# Supplementary material for: Amino acids biosynthesis and nitrogen assimilation pathways: a great genomic deletion during eukaryotes evolution
Source: PubMed Central journal article supplement (PMC3287585; doi:10.1186/1471-2164-12-s4-s2), 2011-12-22
Supplement: 1471-2164-12-S4-S2-S1.pdf [file 1471-2164-12-S4-S2-S1.pdf]

| Kingdom               | Phylum<br>Status    | Genomes    |                |            | Sequences |                |            |         |
|-----------------------|---------------------|------------|----------------|------------|-----------|----------------|------------|---------|
|                       |                     | Complete   | Draft/Progress | Incomplete | Complete  | Draft/Progress | Incomplete |         |
| Archaea               | Euryarchaeota       | 36         | 18             | 241        | 43736     | 6309           | 101270     |         |
|                       | Crenarchaeota       | 14         | 4              | 81         | 12739     | 20             | 46514      |         |
|                       | Thaumarchaeota      | 0          | 0              | 67         | 0         | 0              | 6588       |         |
|                       | Korarchaeota        | 0          | 0              | 1          | 0         | 0              | 1602       |         |
|                       | Nanoarchaeota       | 0          | 0              | 1          | 0         | 0              | 536        |         |
| Bacteria              | Proteobacteria      | 260        | 217            | 3378       | 409449    | 313468         | 2787726    |         |
|                       | Firmicutes          | 101        | 120            | 1404       | 120564    | 87088          | 1645424    |         |
|                       | Actinobacteria      | 72         | 48             | 1133       | 193954    | 56153          | 487490     |         |
|                       | Cyanobacteria       | 27         | 20             | 695        | 70476     | 37473          | 113079     |         |
|                       | Tenericutes         | 23         | 15             | 201        | 8410      | 5431           | 22797      |         |
|                       | Bacteroidetes       | 19         | 51             | 148        | 46888     | 100788         | 231833     |         |
|                       | Spirochaetes        | 15         | 9              | 140        | 10249     | 2850           | 46771      |         |
|                       | Chloroflexi         | 11         | 0              | 24         | 13653     | 0              | 38614      |         |
|                       | Chlamydiae          | 6          | 2              | 25         | 5736      | 67             | 21562      |         |
|                       | Aquificae           | 6          | 2              | 11         | 4977      | 3050           | 10287      |         |
|                       | Chlorobi            | 6          | 0              | 13         | 2296      | 0              | 25167      |         |
|                       | Deinococcus-Thermus | 5          | 4              | 51         | 9775      | 105            | 16464      |         |
|                       | Fusobacteria        | 4          | 11             | 14         | 7812      | 17164          | 21627      |         |
|                       | Thermotogae         | 4          | 1              | 26         | 2032      | 3              | 20820      |         |
|                       | Planctomycetes      | 2          | 0              | 13         | 11528     | 0              | 21677      |         |
|                       | Verrucomicrobia     | 1          | 6              | 11         | 4         | 15585          | 19169      |         |
|                       | Synergistetes       | 1          | 3              | 4          | 1737      | 3864           | 8561       |         |
|                       | Acidobacteria       | 1          | 1              | 7          | 2         | 4873           | 16318      |         |
|                       | Deferribacteres     | 1          | 1              | 1          | 2901      | 1              | 2338       |         |
|                       | Dictyoglomi         | 1          | 0              | 3          | 5         | 0              | 3658       |         |
|                       | Fibrobacteres       | 1          | 0              | 2          | 13        | 0              | 3099       |         |
|                       | Nitrospirae         | 0          | 1              | 7          | 0         | 144            | 9664       |         |
|                       | Elusimicrobia       | 0          | 1              | 2          | 0         | 8              | 2295       |         |
|                       | Lentisphaerae       | 0          | 0              | 2          | 0         | 0              | 8863       |         |
|                       | Gemmatimonadetes    | 0          | 0              | 1          | 0         | 0              | 3932       |         |
|                       | Eukaryota           | Ascomycota | 13             | 82         | 863       | 50653          | 132052     | 377064  |
| Alveolata             |                     | 5          | 21             | 307        | 6340      | 74820          | 75161      |         |
| Apicomplexa           |                     | 5          | 14             | 146        | 6340      | 34770          | 40162      |         |
| Streptophyta          |                     | 3          | 65             | 15248      | 91651     | 282174         | 134334     |         |
| Chlorophyta           |                     | 3          | 6              | 176        | 16067     | 10378          | 17496      |         |
| Euglenozoa            |                     | 3          | 5              | 100        | 22568     | 26141          | 12956      |         |
| Chordata              |                     | 2          | 93             | 14054      | 5180      | 256829         | 107078     |         |
| Arthropoda            |                     | 2          | 47             | 3390       | 30323     | 248453         | 30723      |         |
| Microsporidia         |                     | 2          | 3              | 8          | 1926      | 149            | 4714       |         |
| Nematoda              |                     | 1          | 23             | 152        | 23947     | 29205          | 1863       |         |
| Basidiomycota         |                     | 1          | 14             | 222        | 9784      | 7287           | 44142      |         |
| Rhodophyta            |                     | 1          | 1              | 131        | 276       | 97             | 1415       |         |
| Amoebozoa             |                     | 0          | 10             | 24         | 0         | 21310          | 20727      |         |
| Ciliophora            |                     | 0          | 7              | 104        | 0         | 39989          | 16005      |         |
| Heterokontophyta      |                     | 0          | 6              | 300        | 0         | 441            | 40114      |         |
| Platyhelminthes       |                     | 0          | 5              | 96         | 0         | 17402          | 1369       |         |
| Fornicata             |                     | 0          | 5              | 7          | 0         | 396            | 11652      |         |
| Mollusca              |                     | 0          | 4              | 474        | 0         | 410            | 5121       |         |
| Rhizaria              |                     | 0          | 3              | 9          | 0         | 1342           | 94         |         |
| Cnidaria              |                     | 0          | 2              | 301        | 0         | 13310          | 1663       |         |
| Choanozoa             |                     | 0          | 2              | 2          | 0         | 8323           | 10         |         |
| Parabasalia           |                     | 0          | 1              | 14         | 0         | 44596          | 73         |         |
| Haptophyta            |                     | 0          | 1              | 13         | 0         | 177            | 93         |         |
| Placozoa              |                     | 0          | 1              | 11         | 0         | 9640           | 70         |         |
| Cryptophyta           |                     | 0          | 0              | 17         | 0         | 0              | 1485       |         |
| Neocallimastigomycota |                     | 0          | 0              | 12         | 0         | 0              | 90         |         |
| Glaucophyta           |                     | 0          | 0              | 3          | 0         | 0              | 175        |         |
| <b>Total</b>          |                     |            | 658            | 956        | 43891     | 1243991        | 1914135    | 6691594 |
|                       |                     |            |                | 45505      |           |                | 9849720    |         |
