# Supplementary material for: Amino acids biosynthesis and nitrogen assimilation pathways: a great genomic deletion during eukaryotes evolution
Source: PubMed Central journal article supplement (PMC3287585; doi:10.1186/1471-2164-12-s4-s2), 2011-12-22

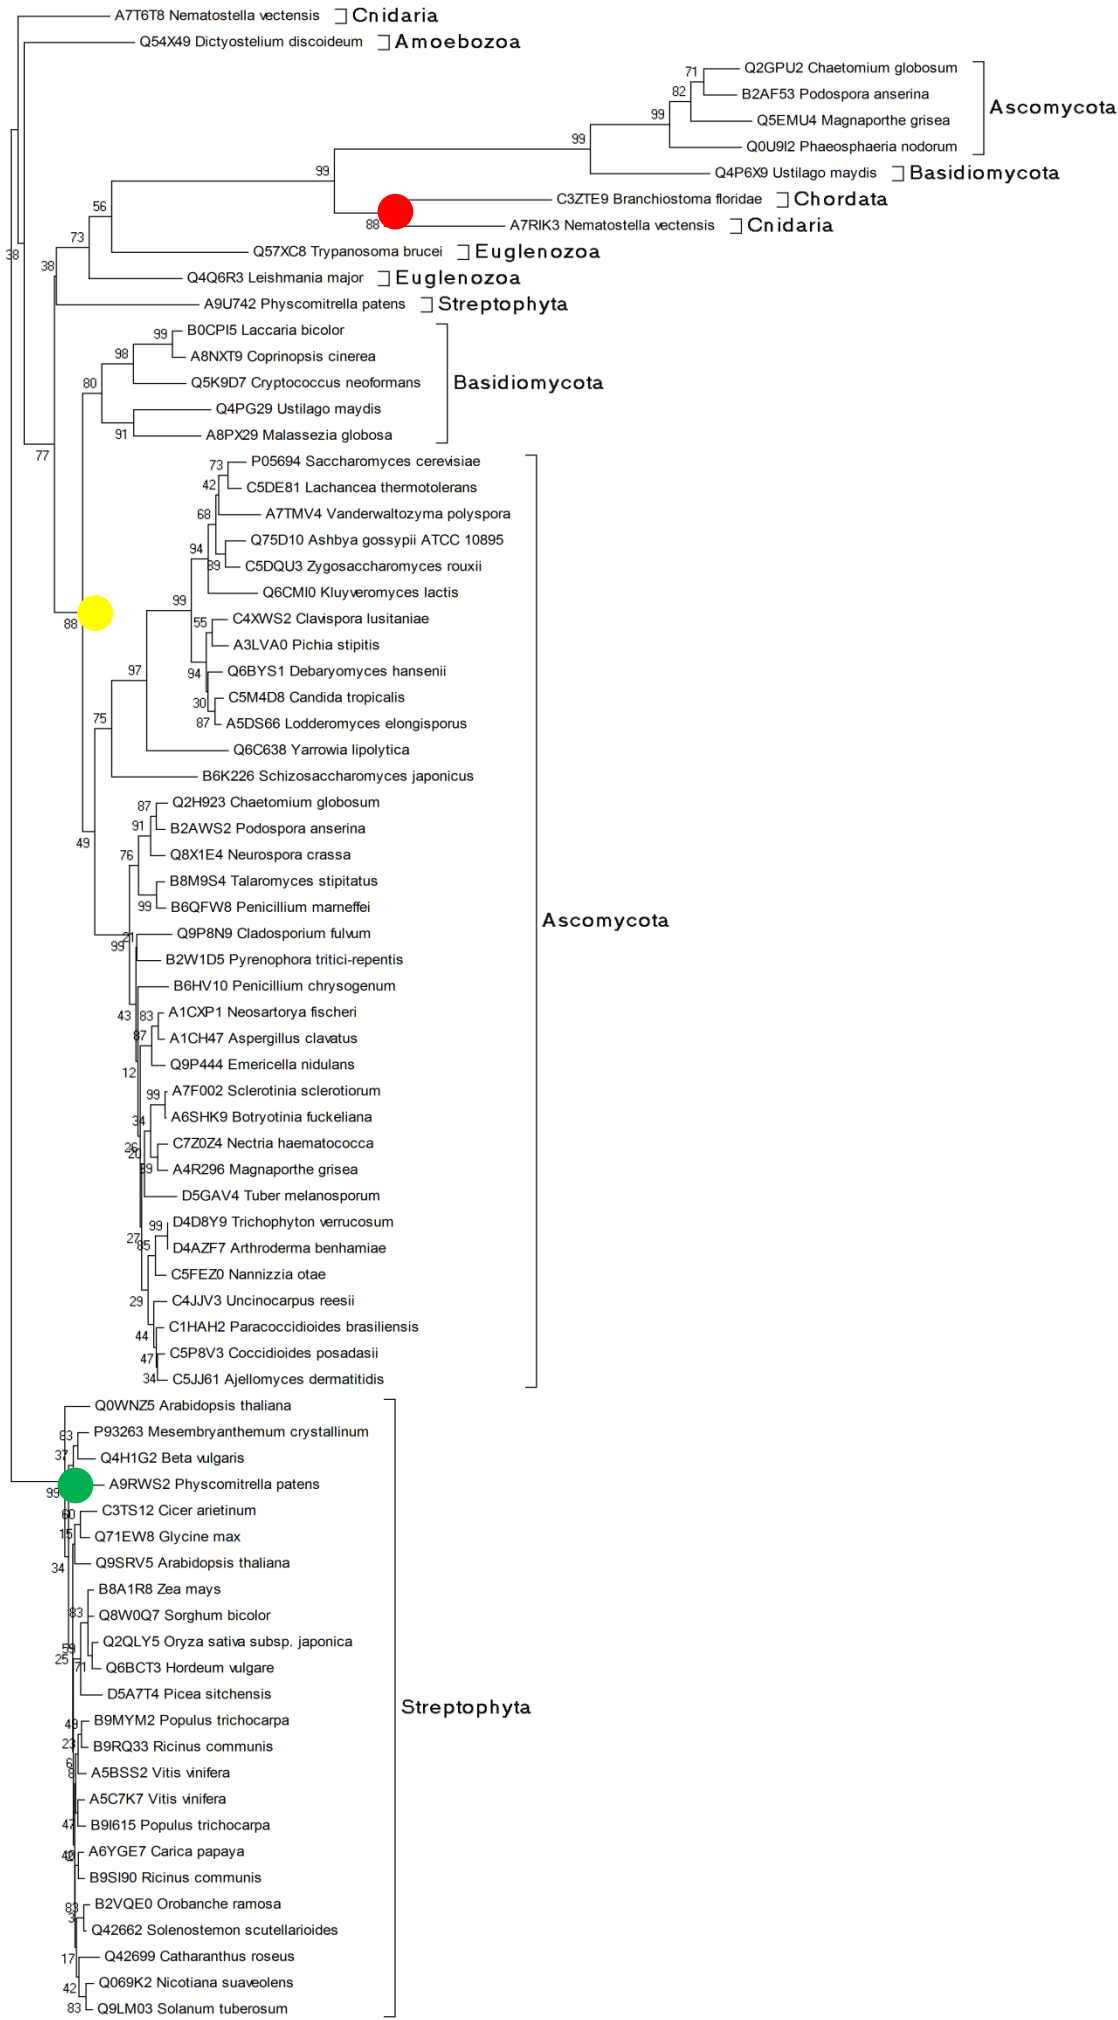

Supplement: 1471-2164-12-S4-S2-S2.pdf [file 1471-2164-12-S4-S2-S2.pdf]
