# Supplementary material for: Amino acids biosynthesis and nitrogen assimilation pathways: a great genomic deletion during eukaryotes evolution
Source: PubMed Central journal article supplement (PMC3287585; doi:10.1186/1471-2164-12-s4-s2), 2011-12-22
Supplement: 1471-2164-12-S4-S2-S3.pdf [file 1471-2164-12-S4-S2-S3.pdf]

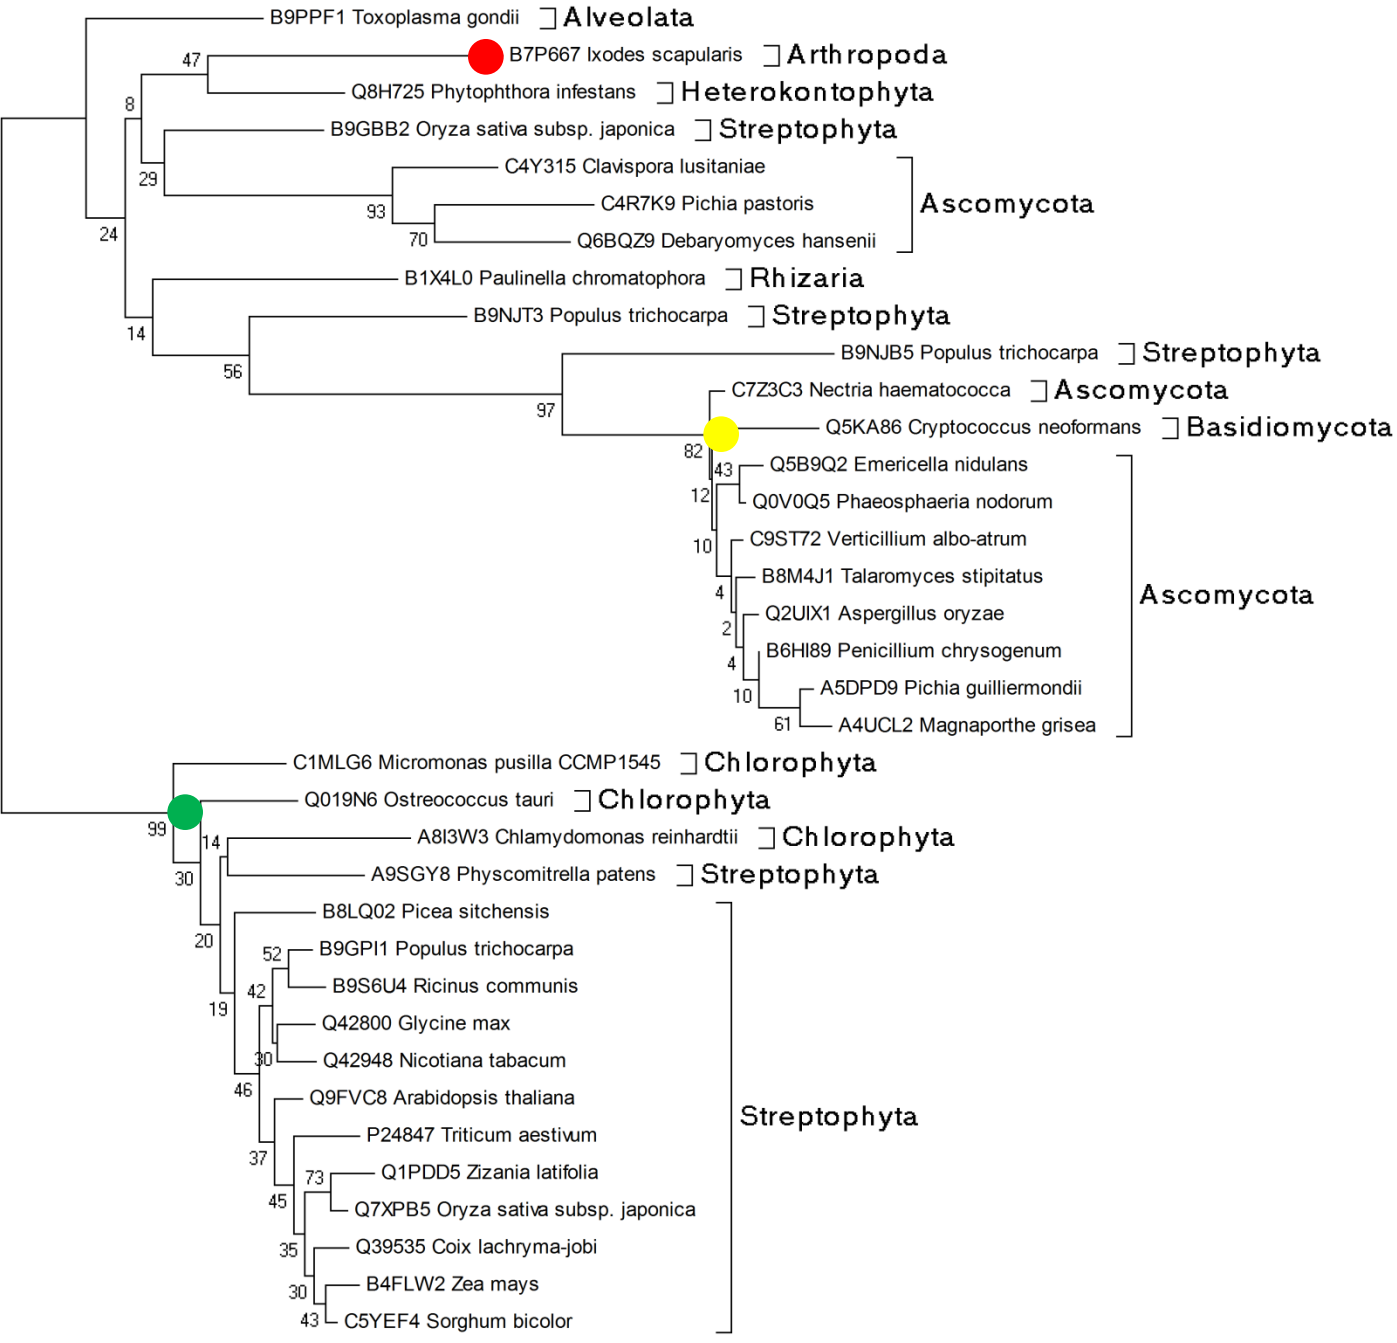

B9PPF1 *Toxoplasma gondii* □ Alveolata

47 B7P667 *Ixodes scapularis* □ Arthropoda

8 Q8H725 *Phytophthora infestans* □ Heterokontophyta

B9GBB2 *Oryza sativa* subsp. japonica □ Streptophyta

29 C4Y315 *Clavispora lusitanae*

93 C4R7K9 *Pichia pastoris*

70 Q6BQZ9 *Debaryomyces hansenii*

Ascomycota

B1X4L0 *Paulinella chromatophora* □ Rhizaria

14 B9NJT3 *Populus trichocarpa* □ Streptophyta

56 B9NJB5 *Populus trichocarpa* □ Streptophyta

97 C7Z3C3 *Nectria haematococca* □ Ascomycota

82 Q5KA86 *Cryptococcus neoformans* □ Basidiomycota

43 Q5B9Q2 *Emericella nidulans*

12 Q0V0Q5 *Phaeosphaeria nodorum*

10 C9ST72 *Verticillium albo-atrum*

4 B8M4J1 *Talaromyces stipitatus*

2 Q2UIX1 *Aspergillus oryzae*

4 B6HI89 *Penicillium chrysogenum*

10 A5DPD9 *Pichia guilliermondii*

61 A4UCL2 *Magnaporthe grisea*

Ascomycota

99 C1MLG6 *Micromonas pusilla* CCMP1545 □ Chlorophyta

30 Q019N6 *Ostreococcus tauri* □ Chlorophyta

14 A8I3W3 *Chlamydomonas reinhardtii* □ Chlorophyta

30 A9SGY8 *Physcomitrella patens* □ Streptophyta

20 B8LQ02 *Picea sitchensis*

52 B9GP11 *Populus trichocarpa*

42 B9S6U4 *Ricinus communis*

19 Q42800 *Glycine max*

30 Q42948 *Nicotiana tabacum*

46 Q9FVC8 *Arabidopsis thaliana*

37 P24847 *Triticum aestivum*

73 Q1PDD5 *Zizania latifolia*

45 Q7XPB5 *Oryza sativa* subsp. japonica

35 Q39535 *Coix lachryma-jobi*

30 B4FLW2 *Zea mays*

43 C5YEF4 *Sorghum bicolor*

Streptophyta

0.2
