# Supplementary material for: Amino acids biosynthesis and nitrogen assimilation pathways: a great genomic deletion during eukaryotes evolution
Source: PubMed Central journal article supplement (PMC3287585; doi:10.1186/1471-2164-12-s4-s2), 2011-12-22
Supplement: 1471-2164-12-S4-S2-S4.pdf [file 1471-2164-12-S4-S2-S4.pdf]

| Enzyme                                                                   | Seed(s)                                        | Taxonomy                             | E.C.                                                   |
|--------------------------------------------------------------------------|------------------------------------------------|--------------------------------------|--------------------------------------------------------|
| ATP phosphoribosyltransferase                                            | Q8GSJ1<br>P00498                               | 3702<br>4932                         | 2.4.2.17                                               |
| oribosyl-ATP pyrophosphohydrolase / phosphoribosyl-AMP<br>cyclohydrolase | O82768                                         | 3702                                 | 3.6.1.31/3.5.4.19                                      |
| 5 proFAR isomerase                                                       | P40545<br>O82782                               | 4932<br>3702                         | 5.3.1.16                                               |
| glutamine amidotransferase                                               | P33734<br>Q9SZ30                               | 4932<br>3702                         | 2.4.2.-                                                |
| imidazoleglycerol-phosphate dehydratase                                  | A8MQQ8<br>P06633                               | 3702<br>4932                         | 4.2.1.19                                               |
| histidinol-phosphate aminotransferase                                    | Q949X3<br>B9DHD3<br>P07172                     | 3702<br>3702<br>4932                 | 2.6.1.9                                                |
| histidinol-phosphatase                                                   | P38635                                         | 4932                                 | 3.1.3.15                                               |
| histidinol dehydrogenase                                                 | P00815<br>Q9C5U8                               | 4932<br>3702                         | 1.1.1.23                                               |
| 3-deoxy-7-phosphoheptulonate synthase                                    | Q9SK84<br>P32449                               | 3702<br>4932                         | 2.5.1.54                                               |
| Pentafunctional AROM polypeptide                                         | P08566                                         | 3702                                 | 4.2.3.4 / 4.2.1.10/<br>1.1.1.25 /2.7.1.71/<br>2.5.1.19 |
| 3-dehydroquinate synthase                                                | Q8VYV7                                         | 3702                                 | 4.2.3.4                                                |
| hydroquinatase I/shikimate 5-dehydrogenase                               | Q9SQT8                                         | 3702                                 | 4.2.1.10 / 1.1.1.25                                    |
| shikimate kinase                                                         | A8MRG1                                         | 3702                                 | 2.7.1.71                                               |
| 3-phosphoshikimate 1-carboxyvinyltransferase                             | Q9FVP6                                         | 3702                                 | 2.5.1.19                                               |
| chorismate synthase                                                      | P28777<br>Q2V4I0                               | 4932<br>3702                         | 4.2.3.5                                                |
| chorismate mutase                                                        | P32178<br>Q9C544                               | 4932<br>3702                         | 5.4.99.5                                               |
| prephenate dehydratase                                                   | P32452                                         | 4932                                 | 4.2.1.51                                               |
| aspartate aminotransferase                                               | Q01802<br>P46646                               | 4932<br>3702                         | 2.6.1.1                                                |
| histidinol-phosphate aminotransferase                                    | P07172<br>Q949X3<br>B9DHD3                     | 4932<br>3702<br>3702                 | 2.6.1.9                                                |
| aromatic amino acid aminotransferase                                     | P53090<br>P38840                               | 4932<br>4932                         | 2.6.1.57                                               |
| tyrosine aminotransferase                                                | Q9LVY1                                         | 3702                                 | 2.6.1.5                                                |
| anthranilate synthase                                                    | P00899<br>Q9FXK1                               | 3702<br>4932                         | 4.1.3.27                                               |
| functional indole-3-glycerol phosphate synthase/anthranilate<br>synthase | P00937                                         | 3702                                 | 4.1.3.27<br>4.1.1.48                                   |
| anthranilate phosphoribosyltransferase                                   | Q02166<br>P07285<br>Q02166                     | 3702<br>4932<br>3702                 | 2.4.2.18                                               |
| N (5-Phosphoribosyl) anthranilate isomerase                              | B3H4J9<br>P00912                               | 3702<br>4932                         | 4.3.1.24                                               |
| indole-3-glycerol phosphate synthase                                     | P49572<br>Q1EBW5                               | 3702<br>3702                         | 4.1.1.48                                               |
| tryptophan synthase                                                      | Q42529<br>P00931<br>P25269<br>Q0WS13<br>Q9FFW8 | 3702<br>4932<br>3702<br>3702<br>3702 | 4.2.1.20                                               |
| acetolactate synthase                                                    | P17597<br>P07342<br>P25605                     | 3702<br>4932<br>4932                 | 2.2.1.6                                                |
| ketol-acid reductoisomerase                                              | Q05758<br>P06168                               | 3702<br>4932                         | 1.1.1.86                                               |
| dihydroxy-acid dehydratase                                               | P39522<br>Q9LIR4                               | 4932<br>3702                         | 4.2.1.9                                                |
| branched-chain amino acid aminotransferase                               | Q9M439<br>B9DHH5<br>P38991<br>P47176           | 3702<br>3702<br>4932<br>4932         | 2.6.1.42                                               |
| threonine dehydratase                                                    | Q9ZSS6                                         | 3702                                 | 4.3.1.19                                               |

|                                                                       |                                                          |                                              |                  |
|-----------------------------------------------------------------------|----------------------------------------------------------|----------------------------------------------|------------------|
|                                                                       | P00927                                                   | 4932                                         |                  |
| Pyruvate dehydrogenase                                                | O24457<br>Q8HIY0<br>Q9C6Z3<br>P52901<br>O64688<br>Q38799 | 4932<br>4932<br>4932<br>4932<br>4932<br>4932 | 1.2.4.1          |
| 2-isopropylmalate synthase                                            | Q9LPR4<br>Q9C550<br>P06208                               | 3702<br>3702<br>4932                         | 2.3.3.13         |
| 3-isopropylmalate dehydratase                                         | P07264<br>Q94AR8<br>Q9ZW85                               | 4932<br>3702<br>3702                         | 4.2.1.33         |
| 3-isopropylmalate dehydrogenase                                       | Q9SA14<br>P04173                                         | 3702<br>4932                                 | 1.1.1.85         |
| homocitrate synthase                                                  | Q12122                                                   | 4932                                         | 2.3.3.14         |
| homoaconitate hydratase                                               | P49367                                                   | 4932                                         | 4.2.1.36         |
| homoisocitrate dehydrogenase                                          | P40495                                                   | 4932                                         | 1.1.1.87         |
| aminoadipate-semialdehyde dehydrogenase                               | P07702<br>P50113                                         | 4932<br>4932                                 | 1.2.1.31         |
| tharopine dehydrogenase (NADP+, L-glutamate forming)                  | P38999                                                   | 4932                                         | 1.5.1.10         |
| accharopine dehydrogenase (NAD+, L-lysine forming)                    | P38998                                                   | 4932                                         | 1.5.1.17         |
| aspartate kinase                                                      | Q9S702<br>Q9LYU8<br>O23653                               | 3702<br>3702<br>3702                         | 2.7.2.4          |
| bifunctional aspartokinase/homoserine dehydrogenase                   | Q9SA18                                                   | 4932                                         | 2.7.2.4/ 1.1.1.3 |
| aspartate-semialdehyde dehydrogenase                                  | Q8VYI4                                                   | 3702                                         | 1.2.1.11         |
|                                                                       | Q9FVC8<br>Q0WSN6                                         | 3702<br>3702                                 | 4.2.1.52         |
| dihydrodipicolinate synthase                                          | Q9FJ82                                                   | 3702                                         | 1.3.1.26         |
| dihydrodipicolinate reductase                                         | Q93ZN9                                                   | 3702                                         | 2.6.1.83         |
| LL-diaminopimelate aminotransferase                                   | Q9LFG2                                                   | 3702                                         | 5.1.1.7          |
| diaminopimelate epimerase                                             | Q949X7                                                   | 3702                                         | 4.1.1.20         |
| diaminopimelate decarboxylase                                         | P31116                                                   | 4932                                         | 1.1.1.3          |
| homoserine dehydrogenase                                              | P08465                                                   | 4932                                         | 2.3.1.31         |
| homoserine O-acetyltransferase                                        | P55217<br>P47164                                         | 3702<br>4932                                 | 2.5.1.48         |
| cystathionine gamma-synthase                                          | P53780<br>B9DGA0<br>P43623                               | 3702<br>3702<br>4932                         | 4.4.1.8          |
| cystathionine beta-lyase                                              | Q0WNZ5<br>P05694                                         | 3702<br>4932                                 | 2.1.1.14         |
| 5-methyltetrahydropteroyltriglutamate--homocysteine methyltransferase | Q8LAX0                                                   | 3702                                         | 2.1.1.10         |
| homocysteine S-methyltransferase                                      | Q93088                                                   | 9606                                         | 2.1.1.5          |
| betaine-homocysteine methyltransferase                                | Q99707                                                   | 9606                                         | 2.1.1.13         |
| nethyltetrahydrofolate--homocysteine methyltransferase                | Q42588<br>Q42538                                         | 3702<br>3702                                 | 2.3.1.30         |
| serine O-acetyltransferase                                            | P53206<br>P06106                                         | 4932<br>4932                                 | 2.5.1.47         |
| cysteine synthase A                                                   | P31373                                                   | 4932                                         | 4.4.1.1          |
| cystathionine gamma-lyase                                             | Q8L7R2<br>P17423                                         | 3702<br>4932                                 | 2.7.1.39         |
| homoserine kinase                                                     | Q9SSP5<br>P16120                                         | 3702<br>4932                                 | 4.2.3.1          |
| threonine synthase                                                    | O04130<br>Q9LT69<br>O49485<br>P40054<br>P40510           | 3702<br>3702<br>3702<br>4932<br>4932         | 1.1.1.95         |
| D-3-phosphoglycerate dehydrogenase                                    | P33330<br>Q9SHP0<br>Q96255<br>Q1EBU1                     | 4932<br>3702<br>3702<br>3702                 | 2.6.1.52         |
| phosphoserine aminotransferase                                        |                                                          |                                              |                  |

|                                                                           |        |      |                     |
|---------------------------------------------------------------------------|--------|------|---------------------|
| phosphoserine phosphatase                                                 | O82796 | 3702 | 3.1.3.3             |
|                                                                           | P42941 | 4932 |                     |
| Serine/<br>threonine dehydratase                                          | P25379 | 4932 | 4.3.1.17 / 4.3.1.19 |
|                                                                           | P00927 | 4932 |                     |
|                                                                           | Q9ZSS6 | 3702 |                     |
| Serine-glyoxylate / Alanine—glyoxylate /<br>serine-pyruvate transaminases | P43567 | 4932 | 2.6.1.45            |
|                                                                           | Q56YA5 | 3702 |                     |
| glycine hydroxymethyltransferase                                          | Q9LM59 | 3702 | 2.1.2.1             |
|                                                                           | P37292 | 4932 |                     |
|                                                                           | P37291 | 4932 |                     |
| threonine aldolase                                                        | P37303 | 4932 | 4.1.2.5             |
|                                                                           | Q8RXU4 | 3702 |                     |
| glutamate dehydrogenase, NAD-specific                                     | P33327 | 4932 | 1.4.1.2             |
| glutamate dehydrogenase, NAD(P)                                           | Q38946 | 3702 | 1.4.1.3             |
|                                                                           | Q43314 | 3702 |                     |
|                                                                           | Q9S7A0 | 3702 |                     |
| glutamate dehydrogenase, NADP-specific                                    | P39708 | 4932 | 1.4.1.4             |
|                                                                           | P07262 | 4932 |                     |
|                                                                           | Q9C8I0 | 3702 |                     |
