# Supplementary material for: Amino acids biosynthesis and nitrogen assimilation pathways: a great genomic deletion during eukaryotes evolution
Source: PubMed Central journal article supplement (PMC3287585; doi:10.1186/1471-2164-12-s4-s2), 2011-12-22
Supplement: 1471-2164-12-S4-S2-S5.pdf [file 1471-2164-12-S4-S2-S5.pdf]

| <b>ATP<br/>phosphoribosyltransferase</b> |             | <b>phosphoribosyl-ATP<br/>pyrophosphohydrolase<br/>/ phosphoribosyl-AMP<br/>cyclohydrolase</b> |             | <b>phosphoribosylformimino-<br/>5-aminoimidazole<br/>carboxamide ribotide<br/>isomerase</b> |             |
|------------------------------------------|-------------|------------------------------------------------------------------------------------------------|-------------|---------------------------------------------------------------------------------------------|-------------|
| <b>UniProt</b>                           | <b>TXID</b> | <b>UniProt</b>                                                                                 | <b>TXID</b> | <b>UniProt</b>                                                                              | <b>TXID</b> |
| A1CDD6                                   | 5057        | O82768                                                                                         | 3702        | P40545                                                                                      | 4932        |
| A1DCB4                                   | 331117      | D7KGN4                                                                                         | 81972       | D6VVQ9                                                                                      | 559292      |
| A2R1F8                                   | 425011      | B9N630                                                                                         | 3694        | C8ZAN0                                                                                      | 643680      |
| A2XC59                                   | 39946       | A9PAQ7                                                                                         | 3694        | C7GPW8                                                                                      | 574961      |
| A3ADU6                                   | 39947       | C6TGF5                                                                                         | 3847        | B5VKS1                                                                                      | 545124      |
| A3LQN3                                   | 4924        | C5XH91                                                                                         | 4558        | B3LTM8                                                                                      | 285006      |
| A4RN67                                   | 148305      | C5YRI4                                                                                         | 4558        | A6ZVP7                                                                                      | 307796      |
| A4RQW7                                   | 436017      | B6TR63                                                                                         | 4577        | C5DHI6                                                                                      | 559295      |
| A5DB59                                   | 4929        | B4FTI8                                                                                         | 4577        | C5DWL4                                                                                      | 559307      |
| A5E3B2                                   | 36914       | Q5NBQ1                                                                                         | 39947       | Q6FPN5                                                                                      | 5478        |
| A6R7R9                                   | 339724      | A2WNF2                                                                                         | 39946       | Q6CQL7                                                                                      | 28985       |
| A6RIQ7                                   | 332648      | A9NSD7                                                                                         | 3332        | Q75AP1                                                                                      | 33169       |
| A6ZR07                                   | 307796      | C1FFV9                                                                                         | 296587      | Q6C2U0                                                                                      | 4952        |
| A6ZXA7                                   | 307796      | C1MQ66                                                                                         | 564608      | C4XY51                                                                                      | 306902      |
| A7EFF7                                   | 665079      | A4RVN0                                                                                         | 436017      | Q595W2                                                                                      | 4922        |
| A7TGA4                                   | 436907      | A9TNG9                                                                                         | 145481      | C4R7L1                                                                                      | 644223      |
| A8NRN1                                   | 240176      | A8HTA8                                                                                         | 3055        | A5DQ45                                                                                      | 4929        |
| A8PXL8                                   | 425265      | Q01BC3                                                                                         | 70448       | Q6BUV9                                                                                      | 4959        |
| A9RE17                                   | 145481      | B1X3F5                                                                                         | 39717       | C5MDV0                                                                                      | 294747      |
| A9TKG9                                   | 145481      |                                                                                                |             | C4YGS6                                                                                      | 5476        |
| A9V418                                   | 81824       |                                                                                                |             | Q5A461                                                                                      | 5476        |
| B0CV00                                   | 486041      |                                                                                                |             | Q9HFV5                                                                                      | 5476        |
| B0YCF8                                   | 451804      |                                                                                                |             | Q0TVM2                                                                                      | 13684       |
| B1X5W0                                   | 39717       |                                                                                                |             | B9WGL6                                                                                      | 573826      |
| B2AYV5                                   | 5145        |                                                                                                |             | C7YQZ0                                                                                      | 660122      |
| B2CNY2                                   | 37727       |                                                                                                |             | A3GF99                                                                                      | 4924        |
| B2VZY6                                   | 426418      |                                                                                                |             | A5E4R0                                                                                      | 36914       |
| B3LS69                                   | 285006      |                                                                                                |             | A8NXH0                                                                                      | 240176      |
| B4FED7                                   | 4577        |                                                                                                |             | Q5KMJ6                                                                                      | 5207        |
| B5VHI8                                   | 545124      |                                                                                                |             | Q4WTU8                                                                                      | 5085        |
| B6K7N1                                   | 402676      |                                                                                                |             | B0Y3C5                                                                                      | 451804      |
| B6QDW1                                   | 441960      |                                                                                                |             | A4QTQ4                                                                                      | 148305      |
| B7FG77                                   | 3880        |                                                                                                |             | B2AVV1                                                                                      | 5145        |
| B7FKJ6                                   | 3880        |                                                                                                |             | A1C9V9                                                                                      | 5057        |
| B7FST0                                   | 556484      |                                                                                                |             | A1CZF2                                                                                      | 331117      |
| B8C4E1                                   | 35128       |                                                                                                |             | B0DEY9                                                                                      | 486041      |
| B8LKY9                                   | 3332        |                                                                                                |             | A7F4D3                                                                                      | 665079      |
| B8MAE4                                   | 441959      |                                                                                                |             | Q0CA71                                                                                      | 341663      |
| B8MW29                                   | 332952      |                                                                                                |             | C1G297                                                                                      | 502780      |
| B9IQ50                                   | 3694        |                                                                                                |             | Q7RXQ8                                                                                      | 5141        |
| B9N0B8                                   | 3694        |                                                                                                |             | B6K0F2                                                                                      | 402676      |
| B9TB20                                   | 3988        |                                                                                                |             | Q2HA31                                                                                      | 38033       |

|        |        |        |        |
|--------|--------|--------|--------|
| B9WI74 | 573826 | Q10184 | 4896   |
| C0NWV6 | 447093 | A2R9J4 | 425011 |
| C0PKL2 | 4577   | C0SG53 | 482561 |
| C0SJH4 | 482561 | D1ZBG9 | 5147   |
| C1E526 | 296587 | C5P783 | 222929 |
| C1FD92 | 296587 | B8MBV5 | 441959 |
| C1GN18 | 502780 | B2VV69 | 426418 |
| C1HE96 | 502779 | B6QGA6 | 441960 |
| C1MKU1 | 564608 | B6H0P4 | 500485 |
| C1N2F4 | 564608 | D5GEF5 | 39416  |
| C4JZZ0 | 336963 | C1GPG6 | 502779 |
| C4QXU6 | 644223 | C5FVZ9 | 554155 |
| C4Y1R3 | 306902 | A6RU76 | 332648 |
| C4YS40 | 5476   | A9UW68 | 81824  |
| C5DBN7 | 559295 | C5JMG9 | 559298 |
| C5DWQ6 | 559307 | C5GAK6 | 559297 |
| C5FYG9 | 554155 | C0NQY6 | 447093 |
| C5GR28 | 559297 | Q2UTQ1 | 5062   |
| C5K2L1 | 559298 | D4DCL9 | 663202 |
| C5MJ95 | 294747 | D4AII3 | 663331 |
| C5PBG2 | 222929 | A6RFY4 | 339724 |
| C6HBE9 | 544712 | C6HPY0 | 544712 |
| C6TAE9 | 3847   | D0NQR0 | 403677 |
| C7GX46 | 574961 | B8CDV9 | 35128  |
| C7YJX1 | 660122 | D7LIP8 | 81972  |
| C8V7A0 | 227321 | Q5TKS8 | 3702   |
| C8Z760 | 643680 | O82782 | 3702   |
| C9SJI6 | 526221 | C0Z2T9 | 3702   |
| D0NCB8 | 403677 | B9FPI1 | 39947  |
| D1ZGP9 | 5147   | B7GE60 | 556484 |
| D3DLV8 | 559292 | A8JDM6 | 3055   |
| D4B1U9 | 663331 | B7FHU9 | 3880   |
| D4D7Y3 | 663202 | C1MIV3 | 564608 |
| D5GKQ7 | 39416  | C1MIV2 | 564608 |
| D7KJU4 | 81972  | C6TJR8 | 3847   |
| D7KY77 | 81972  | B6TRF8 | 4577   |
| D7KY80 | 81972  | C4IYN8 | 4577   |
| O46887 | 60913  | B4FIP2 | 4577   |
| P00498 | 4932   | C0PFD1 | 4577   |
| P40373 | 4896   | B6UEA7 | 4577   |
| P46586 | 5476   | C5WWI2 | 4558   |
| Q01GN6 | 70448  | C5YXM8 | 4558   |
| Q0CPP7 | 341663 | D7G369 | 2880   |
| Q0UWH6 | 13684  | A4RZJ6 | 436017 |
| Q10S55 | 39947  | B8AY22 | 39946  |
| Q2HG71 | 38033  | Q015Z9 | 70448  |

|        |        |        |        |
|--------|--------|--------|--------|
| Q2UT69 | 5062   | C9SVG4 | 526221 |
| Q4P1J6 | 5270   | C1E011 | 296587 |
| Q4WGB9 | 5085   | Q5BAY7 | 162425 |
| Q56US4 | 226036 | C8VN40 | 227321 |
| Q56US5 | 226036 | A8Q0I1 | 425265 |
| Q56UT2 | 226033 | B9SRY4 | 3988   |
| Q56UT3 | 226033 | A5ASH5 | 29760  |
| Q595W5 | 4922   | A9STZ1 | 145481 |
| Q5B6T2 | 162425 | C4JNC3 | 336963 |
| Q5F0I1 | 42374  | C7J278 | 39947  |
| Q5KIW5 | 5207   |        |        |
| Q6BRU4 | 4959   |        |        |
| Q6CID6 | 28985  |        |        |
| Q6FLT7 | 5478   |        |        |
| Q75AK8 | 33169  |        |        |
| Q7SDF1 | 5141   |        |        |
| Q8GSJ1 | 3702   |        |        |
| Q8H8D3 | 39947  |        |        |
| Q8L9K8 | 3702   |        |        |
| Q99145 | 4952   |        |        |
| Q9S762 | 3702   |        |        |
| Q9SLW4 | 3702   |        |        |

**glutamine  
amidotransferase**

| UniProt | TXID   |
|---------|--------|
| P33734  | 4932   |
| D6VQP4  | 559292 |
| D3UEZ5  | 643680 |
| B3LMR4  | 285006 |
| C7GMY3  | 574961 |
| A6ZLI7  | 307796 |
| C5E1L7  | 559307 |
| Q6FX00  | 5478   |
| C5E2I9  | 559295 |
| Q6CL11  | 28985  |
| Q754W3  | 33169  |
| C4R8P0  | 644223 |
| Q0CL18  | 341663 |
| Q2UMI6  | 5062   |
| A7EIH3  | 665079 |
| Q6CCR8  | 4952   |
| A6SEB1  | 332648 |
| Q870Y9  | 5141   |
| Q0TX23  | 13684  |
| D1ZSZ1  | 5147   |
| A1DG44  | 331117 |

**imidazoleglycerol-  
phosphate dehydratase**

| UniProt | TXID   |
|---------|--------|
| A0JJW7  | 100272 |
| A0JJW8  | 100272 |
| A1CM65  | 5057   |
| A1DLV8  | 331117 |
| A2R4J2  | 425011 |
| A4S3Y5  | 436017 |
| A5DCL8  | 4929   |
| A5DUG7  | 36914  |
| A6P4B5  | 135859 |
| A6P4B6  | 5599   |
| A6R119  | 339724 |
| A6RJP8  | 332648 |
| A6ZP46  | 307796 |
| A7E563  | 665079 |
| A7TQC3  | 436907 |
| A8I4F6  | 3055   |
| A8MQQ8  | 3702   |
| A8NGC3  | 240176 |
| A8Q9P0  | 425265 |
| A9P0A9  | 3332   |
| B0D3S7  | 486041 |

**histidinol-phosphate  
aminotransferase**

| UniProt | TXID   |
|---------|--------|
| A1CP53  | 5057   |
| A1D207  | 331117 |
| A2QAL3  | 425011 |
| A3LSV4  | 4924   |
| A4R5D4  | 148305 |
| A4RSZ6  | 436017 |
| A5DDL3  | 4929   |
| A5E3V6  | 36914  |
| A6R8T8  | 339724 |
| A6RQF2  | 332648 |
| A6ZVG1  | 307796 |
| A7E9J3  | 665079 |
| A7THE9  | 436907 |
| A8J3D3  | 3055   |
| A8MRI5  | 3702   |
| A8P5U9  | 240176 |
| A8PCL5  | 240176 |
| A8Q8A0  | 425265 |
| A9NX10  | 3332   |
| A9T6Y6  | 145481 |
| A9VDN0  | 81824  |

|        |        |        |        |        |        |
|--------|--------|--------|--------|--------|--------|
| C7YRY8 | 660122 | B0YCY2 | 451804 | B0DTT8 | 486041 |
| C1GP40 | 502779 | B1X4R8 | 39717  | B0XMN9 | 451804 |
| C0SFE2 | 482561 | B2VVA2 | 426418 | B1X4B7 | 39717  |
| A1C5W0 | 5057   | B4F8F3 | 4577   | B2AS75 | 5145   |
| Q4WH91 | 5085   | B4FI45 | 4577   | B2VYI8 | 426418 |
| B0XW23 | 451804 | B5VS85 | 545124 | B3LTW3 | 285006 |
| B6HK56 | 500485 | B6HGA3 | 500485 | B4FAW7 | 4577   |
| B5VEJ8 | 545124 | B6JW23 | 402676 | B5VKJ3 | 545124 |
| Q9P4P9 | 162425 | B6QVE9 | 441960 | B6HAF7 | 500485 |
| C8VBA3 | 227321 | B6TC53 | 4577   | B6K373 | 402676 |
| C1GL59 | 502780 | B8AUF4 | 39946  | B6QBB4 | 441960 |
| B6Q367 | 441960 | B8MS43 | 441959 | B6TRS1 | 4577   |
| C5FFA9 | 554155 | B8ND57 | 332952 | B7G747 | 556484 |
| C0NQK4 | 447093 | B9P9G9 | 3694   | B8AHA9 | 39946  |
| Q2GYU2 | 38033  | B9RTS0 | 3988   | B8BPZ8 | 296543 |
| B2AC63 | 5145   | B9WBE6 | 573826 | B8M3C4 | 441959 |
| A6QXC8 | 339724 | C0NQI6 | 447093 | B8N6W4 | 332952 |
| A2QFK7 | 425011 | C0PA62 | 4577   | B8P2C7 | 561896 |
| C6HQA9 | 544712 | C0SGZ0 | 482561 | B9DHD3 | 3702   |
| C5K3V3 | 559298 | C1GG64 | 502780 | B9SB59 | 3988   |
| C5GYK0 | 559297 | C1GXF3 | 502779 | B9WFD8 | 573826 |
| B8LT94 | 441959 | C4JNN5 | 336963 | C0NL35 | 447093 |
| D5GBP0 | 39416  | C4R5K6 | 644223 | C0S401 | 482561 |
| O94303 | 4896   | C4XVR0 | 306902 | C1FED0 | 296587 |
| A4RFT8 | 148305 | C5DET9 | 559295 | C1FYG5 | 502780 |
| C5P669 | 222929 | C5FW12 | 554155 | C1GUI5 | 502779 |
| D4B2A2 | 663331 | C5GCN7 | 559297 | C1ML32 | 564608 |
| D4D7G4 | 663202 | C5JW68 | 559298 | C3SA65 | 15368  |
| B6K508 | 402676 | C5M6Z5 | 294747 | C4JYD9 | 336963 |
| C4JT92 | 336963 | C5P226 | 222929 | C4R1F7 | 644223 |
| A5DAA2 | 4929   | C5YG33 | 4558   | C4XWD3 | 306902 |
| A3LSB3 | 4924   | C6HSB7 | 544712 | C4YI23 | 5476   |
| Q6BZ52 | 4959   | C6T988 | 3847   | C5DMK2 | 559295 |
| C4XX45 | 306902 | C6YXH4 | 39947  | C5DPA3 | 559307 |
| A5E679 | 36914  | C6YXL2 | 39947  | C5FC63 | 554155 |
| Q00ZE6 | 70448  | C7GWH9 | 574961 | C5G7N6 | 559297 |
| B9WJS1 | 573826 | C7YUB2 | 660122 | C5JKH7 | 559298 |
| A4S499 | 436017 | C8V0L8 | 227321 | C5M214 | 294747 |
| A9UYA3 | 81824  | C8ZGV8 | 643680 | C5PAB2 | 222929 |
| C1FJN8 | 296587 | C9S945 | 526221 | C5Y092 | 4558   |
| C4YT06 | 5476   | D0NH24 | 403677 | C6TN17 | 3847   |
| Q9HFV7 | 5476   | D0P2W5 | 403677 | C7Z4V1 | 660122 |
| C1N0H6 | 564608 | D1ZHS3 | 5147   | C8VRC2 | 227321 |
| B2VVH1 | 426418 | D4AIG9 | 663331 | C8ZAC8 | 643680 |
| D0N3W2 | 403677 | D4DCK2 | 663202 | C9S832 | 526221 |
| A9S2M5 | 145481 | D4NXF8 | 318829 | D0MY30 | 403677 |

|        |        |        |        |        |        |
|--------|--------|--------|--------|--------|--------|
| Q10NW0 | 39947  | D5GDC8 | 39416  | D1ZCJ6 | 5147   |
| B9F6U6 | 39947  | D6W2Q9 | 559292 | D4AV67 | 663331 |
| B8AKB1 | 39946  | D7FNK5 | 2880   | D4D1H8 | 663202 |
| A8N1B5 | 240176 | D7MBA2 | 81972  | D5GI57 | 39416  |
| Q9SZ30 | 3702   | O23346 | 3702   | D6VVH1 | 559292 |
| Q8GX14 | 3702   | O42621 | 148305 | D7FPJ8 | 2880   |
| D7MEL3 | 81972  | O94126 | 4903   | D7KZ00 | 81972  |
| C4J411 | 4577   | O94153 | 5421   | O82030 | 4097   |
| C5WQU1 | 4558   | P06633 | 4932   | P07172 | 4932   |
| B9SVA2 | 3988   | P28624 | 4792   | P36605 | 4896   |
| B9GFE9 | 3694   | P34041 | 5544   | P56099 | 5479   |
| B9HNP1 | 3694   | P34047 | 3702   | Q0D0C3 | 341663 |
| B0CPN4 | 486041 | P40374 | 4896   | Q0DY86 | 39947  |
| Q4P7Q5 | 5270   | P40919 | 5207   | Q0UQ19 | 13684  |
| B8LDL7 | 296543 | P56090 | 5476   | Q27GM5 | 3702   |
| B7FVQ7 | 556484 | Q02986 | 4934   | Q2H2S0 | 38033  |
| Q5KNA0 | 5207   | Q0CH64 | 341663 | Q2UCT8 | 5062   |
| A7SPR8 | 45351  | Q0UFU5 | 13684  | Q4P634 | 5270   |
| A8PRW0 | 425265 | Q12578 | 5478   | Q4WS41 | 5085   |
| C9S5S7 | 526221 | Q25AR2 | 4530   | Q595W3 | 4922   |
| B8NPG7 | 332952 | Q2HAY0 | 38033  | Q59SJ5 | 5476   |
| A2XM35 | 39946  | Q2U9D6 | 5062   | Q5BFG3 | 162425 |
| C0HF10 | 4577   | Q43072 | 3888   | Q5KM46 | 5207   |
| P48262 | 2762   | Q4PFJ4 | 5270   | Q6BMG0 | 4959   |
| Q7Y020 | 39947  | Q4WDG8 | 5085   | Q6C7F4 | 4952   |
|        |        | Q58FL5 | 5061   | Q6CLF0 | 28985  |
|        |        | Q59LL5 | 5476   | Q6FX16 | 5478   |
|        |        | Q5AYU4 | 162425 | Q6MY81 | 5085   |
|        |        | Q67YN9 | 3702   | Q6YV10 | 39947  |
|        |        | Q67YZ9 | 3702   | Q75B26 | 33169  |
|        |        | Q682C0 | 3702   | Q7S9U6 | 5141   |
|        |        | Q6BTY3 | 4959   | Q8S3S8 | 39947  |
|        |        | Q6C3L0 | 4952   | Q949X3 | 3702   |
|        |        | Q6CLR6 | 28985  | Q9FEW2 | 4092   |
|        |        | Q6JV40 | 4911   |        |        |
|        |        | Q6XD66 | 4950   |        |        |
|        |        | Q75B47 | 33169  |        |        |
|        |        | Q7LV87 | 5478   |        |        |
|        |        | Q7XTN6 | 39947  |        |        |
|        |        | Q92447 | 4922   |        |        |
|        |        | Q96UK2 | 4954   |        |        |
|        |        | Q9C1D4 | 4924   |        |        |
|        |        | Q9C1R3 | 162425 |        |        |
|        |        | Q9HEG3 | 5141   |        |        |
|        |        | Q9UVE1 | 559307 |        |        |

| <b>histidinol-phosphatase</b> |             | <b>histidinol dehydrogenase</b> |             | <b>threonine dehydratase</b> |             |
|-------------------------------|-------------|---------------------------------|-------------|------------------------------|-------------|
| <b>UniProt</b>                | <b>TXID</b> | <b>UniProt</b>                  | <b>TXID</b> | <b>UniProt</b>               | <b>TXID</b> |
| P38635                        | 4932        | P00815                          | 4932        | A0BE77                       | 5888        |
| D6VTQ5                        | 559292      | D6VQY5                          | 559292      | A0CM66                       | 5888        |
| B3LUN4                        | 285006      | C7GSY7                          | 574961      | A0D3F4                       | 5888        |
| C8Z7W0                        | 643680      | B5VES8                          | 545124      | A0D573                       | 5888        |
| B5VI52                        | 545124      | B3LU52                          | 285006      | A0DHM0                       | 5888        |
| C7GYD0                        | 574961      | A6ZTG0                          | 307796      | A0E6U7                       | 5888        |
| A7A262                        | 307796      | Q12670                          | 4931        | A0FKE6                       | 4081        |
| C5E1R2                        | 559307      | Q6FX86                          | 5478        | A1CH94                       | 5057        |
| A7TDX0                        | 436907      | C5DZ21                          | 559307      | A1CHC6                       | 5057        |
| Q6FQ56                        | 5478        | B2G433                          | 4956        | A1CLE7                       | 5057        |
| C5E3F8                        | 559295      | O13471                          | 28985       | A1CR51                       | 5057        |
| Q757N4                        | 33169       | C5DK34                          | 559295      | A1CXG1                       | 331117      |
| Q6CXG5                        | 28985       | A7TFF6                          | 436907      | A1CXJ1                       | 331117      |
| B5RTB4                        | 4959        | Q751X2                          | 33169       | A1D414                       | 331117      |
| A3LY67                        | 4924        | A1BPP9                          | 27317       | A1D5X3                       | 331117      |
| C5MGD3                        | 294747      | C4QXL7                          | 644223      | A2FA06                       | 5722        |
| B9WKJ5                        | 573826      | P45353                          | 4922        | A2FH13                       | 5722        |
| C4YSZ9                        | 5476        | Q12201                          | 4922        | A2FRC0                       | 5722        |
| Q59R21                        | 5476        | C5M233                          | 294747      | A2QI44                       | 425011      |
| A5DQT0                        | 4929        | B9WF89                          | 573826      | A2QI80                       | 425011      |
| C4Y0D4                        | 306902      | O74712                          | 5476        | A2QU10                       | 425011      |
| A5E6D7                        | 36914       | Q59UT2                          | 5476        | A2XWA9                       | 39946       |
| Q6C6Z5                        | 4952        | C4YI61                          | 5476        | A3LW23                       | 4924        |
| B0D579                        | 486041      | A5E3Y9                          | 36914       | A4H4N7                       | 5660        |
| B0DA81                        | 486041      | A3LSS5                          | 4924        | A4HSW5                       | 5671        |
| B6JV46                        | 402676      | Q6CGV2                          | 4952        | A4QUE4                       | 148305      |
| D5GJN0                        | 39416       | A5DE04                          | 4929        | A4RI26                       | 148305      |
| A8NZG4                        | 240176      | Q6BM15                          | 4959        | A4S5M8                       | 436017      |
| Q2PIQ9                        | 5062        | C4Y9Q9                          | 306902      | A5B3Z7                       | 29760       |
| Q2TW36                        | 5062        | C5JU56                          | 559298      | A5DG69                       | 4929        |
| B8NYT7                        | 332952      | C5GK98                          | 559297      | A5DWY6                       | 36914       |
| B8NX22                        | 332952      | C5PAF1                          | 222929      | A5HUN0                       | 4513        |
| B8PEW0                        | 561896      | C5FCK3                          | 554155      | A6RBB5                       | 339724      |
| Q0CVP7                        | 341663      | D4AV25                          | 663331      | A6RGX2                       | 339724      |
| A8Q7S5                        | 425265      | A1DRJ2                          | 13684       | A6RUK3                       | 332648      |
| A9UY93                        | 81824       | A2IBN3                          | 13684       | A6SSX5                       | 332648      |
| Q595W4                        | 4922        | Q2PPB3                          | 13684       | A6ZR41                       | 307796      |
| C4QX01                        | 644223      | Q0UA12                          | 13684       | A6ZTD3                       | 307796      |
| A2R2I3                        | 425011      | A1DRK4                          | 13684       | A7A071                       | 307796      |
| O14059                        | 4896        | D1ZH00                          | 5147        | A7EEW4                       | 665079      |
| Q4W9R1                        | 5085        | B2W4V9                          | 426418      | A7F680                       | 665079      |
| B0YEF3                        | 451804      | P07685                          | 5141        | A7RTQ7                       | 45351       |
| Q0U6E0                        | 13684       | A1DRK5                          | 54790       | A7TFC2                       | 436907      |
| A1D9M3                        | 331117      | A1DRK6                          | 54790       | A7TKZ0                       | 436907      |

|        |        |        |        |        |        |
|--------|--------|--------|--------|--------|--------|
| A7ETF6 | 665079 | A6QYA0 | 339724 | A8BFR5 | 184922 |
| A6RSI8 | 332648 | B8M2Z5 | 441959 | A8I9R1 | 3055   |
| B6H3B9 | 500485 | C0NEX3 | 447093 | A8J977 | 3055   |
| B6QGE8 | 441960 | A6RN57 | 332648 | A8N6Z1 | 240176 |
| B2W097 | 426418 | C1H3R3 | 502779 | A8PY36 | 425265 |
| C4JH85 | 336963 | A1DRK7 | 289418 | A8WNC1 | 6238   |
| A1C968 | 5057   | C1GHM0 | 502780 | A9NZE1 | 3332   |
| C9SUM3 | 526221 | A1DRJ7 | 215456 | A9PI64 | 3694   |
| C5P3X8 | 222929 | A1DRJ8 | 215456 | A9T7L7 | 145481 |
| Q5AXD6 | 162425 | A7F2X1 | 665079 | A9TYA8 | 145481 |
| C8VB59 | 227321 | C0SE67 | 482561 | B0D0M2 | 486041 |
| Q5KJZ9 | 5207   | B2AYL5 | 5145   | B0E7X3 | 370354 |
| Q55W98 | 5207   | C7YID0 | 660122 | B0EJK9 | 370354 |
| C7YYF4 | 660122 | B6QAZ4 | 441960 | B0EK81 | 370354 |
| A4QWC7 | 148305 | A4RL35 | 148305 | B0WUZ1 | 7176   |
| C0SJ61 | 482561 | A1D1W0 | 331117 | B0XPH8 | 451804 |
| C1GMX2 | 502780 | A1CP07 | 5057   | B0XZX9 | 451804 |
| B2ASC1 | 5145   | A8NXP9 | 240176 | B0Y5X4 | 451804 |
| Q4P8I0 | 5270   | Q4WRZ4 | 5085   | B0Y607 | 451804 |
| C1HCC3 | 502779 | B0XMT5 | 451804 | B1N2N4 | 5759   |
| C5JX61 | 559298 | A2QAS4 | 425011 | B1X3V5 | 39717  |
| C5GRN2 | 559297 | C4JY90 | 336963 | B2WAH4 | 426418 |
| C0NVK0 | 447093 | Q0D075 | 341663 | B2WP86 | 426418 |
| C5FG56 | 554155 | B6H9W1 | 500485 | B3LQP1 | 285006 |
| D1ZBW9 | 5147   | Q5BF83 | 162425 | B3LRK3 | 285006 |
| C6HH95 | 544712 | C8VQH9 | 227321 | B3LU22 | 285006 |
| Q7SAH5 | 5141   | Q2ULB1 | 5062   | B3M069 | 7217   |
| D4D1N0 | 663202 | B8N416 | 332952 | B3P1R0 | 7220   |
| D4B512 | 663331 | B0CYG3 | 486041 | B4FIW6 | 4577   |
| B3RWH6 | 10228  | Q7ZA54 | 76867  | B4GP49 | 7234   |
| A6REF8 | 339724 | C6HNT6 | 544712 | B4HKF1 | 7238   |
|        |        | A8Q4R2 | 425265 | B4JI58 | 7222   |
|        |        | Q4P7D9 | 5270   | B4K4Y7 | 7230   |
|        |        | Q5KHK8 | 5207   | B4LW10 | 7244   |
|        |        | Q2HFX2 | 38033  | B4NAJ0 | 7260   |
|        |        | D5GLU8 | 39416  | B4PUM3 | 7245   |
|        |        | Q9P777 | 4896   | B4QWN7 | 7240   |
|        |        | B6JZU7 | 402676 | B5VHL2 | 545124 |
|        |        | C9SQK1 | 526221 | B5VLU7 | 545124 |
|        |        | A4RS01 | 436017 | B6GW79 | 500485 |
|        |        | A9RLK5 | 145481 | B6H312 | 500485 |
|        |        | A9THQ4 | 145481 | B6H3S9 | 500485 |
|        |        | C1N4U9 | 564608 | B6H461 | 500485 |
|        |        | C1EJ66 | 296587 | B6H8Y6 | 500485 |
|        |        | P24226 | 3716   | B6JWQ1 | 402676 |
|        |        | Q9C5U8 | 3702   | B6QHL6 | 441960 |

|        |        |        |        |
|--------|--------|--------|--------|
| D7MQI7 | 81972  | B6QVU8 | 441960 |
| B9GH07 | 3694   | B7FKK4 | 3880   |
| B9N5Q4 | 3694   | B7FV67 | 556484 |
| B7FNC7 | 3880   | B7G9B5 | 556484 |
| B9SBW3 | 3988   | B8C651 | 35128  |
| A8IA89 | 3055   | B8CA45 | 35128  |
| Q5NAY4 | 39947  | B8LQZ5 | 3332   |
| Q0JPA8 | 39947  | B8LR80 | 3332   |
| A2WMG4 | 39946  | B8M831 | 441959 |
| B8A2L1 | 4577   | B8MJJ4 | 441959 |
| C0HDR0 | 4577   | B8MTE8 | 441959 |
| B6TZ66 | 4577   | B8N9L9 | 332952 |
| A9NV24 | 3332   | B8N9Q5 | 332952 |
| A9VA77 | 81824  | B8NEE4 | 332952 |
| A1D0Y3 | 331117 | B8NST7 | 332952 |
| A2R4B4 | 425011 | B8NXW6 | 332952 |
| B8MW43 | 332952 | B8P126 | 561896 |
| O59667 | 4896   | B8PIK6 | 561896 |
| Q0UK43 | 13684  | B9FB69 | 39947  |
| Q2UT59 | 5062   | B9GKJ4 | 3694   |
| Q4WR38 | 5085   | B9MTL7 | 3694   |
| A1DRJ3 | 215456 | B9P9D4 | 3694   |
| A1DRJ6 | 215456 | B9RC97 | 3988   |
| A1DRK0 | 13684  | B9SRK6 | 3988   |
| A1DRK1 | 13684  | B9TLI3 | 3988   |
| A1DRK2 | 54790  | B9WBR7 | 573826 |
| A1DRK3 | 54790  | C0NUL1 | 447093 |
| A9QVF0 | 13684  | C0NZL1 | 447093 |
| A9QVF1 | 13684  | C0RYW0 | 482561 |
| A9QVF3 | 13684  | C0SHC7 | 482561 |
| A9QVF6 | 478522 | C1E7U4 | 296587 |
| B0XPL0 | 451804 | C1G792 | 502780 |
| B2WPW7 | 426418 | C1GGJ3 | 502780 |
| B6K2D2 | 402676 | C1GX28 | 502779 |
| C7ZNF3 | 660122 | C1GYL4 | 502779 |
| C8VK05 | 227321 | C1MX69 | 564608 |
| C9SN00 | 526221 | C1MZ44 | 564608 |
| C9SNW0 | 526221 | C3Y9T1 | 7739   |
| D0NQD1 | 403677 | C4JHR3 | 336963 |
| D5GLU9 | 39416  | C4JWT5 | 336963 |
| Q5B9Q7 | 162425 | C4LUI9 | 5759   |
|        |        | C4LVZ3 | 5759   |
|        |        | C4Q4Y7 | 6183   |
|        |        | C4QXV5 | 644223 |
|        |        | C4Y8M5 | 306902 |
|        |        | C4YIT5 | 5476   |



|        |        |
|--------|--------|
| C5DCQ0 | 559295 |
| C5DJY9 | 559295 |
| C5DQT2 | 559307 |
| C5FMW6 | 554155 |
| C5FSQ8 | 554155 |
| C5GDJ4 | 559297 |
| C5GRI2 | 559297 |
| C5JIT2 | 559298 |
| C5JRJ5 | 559298 |
| C5M6K9 | 294747 |
| C5P446 | 222929 |
| C5PCI1 | 222929 |
| C5WN25 | 4558   |
| C6H216 | 544712 |
| C6HPI2 | 544712 |
| C6LRX6 | 598745 |
| C7GIZ5 | 574961 |
| C7GRR8 | 574961 |
| C7GT17 | 574961 |
| C7YIV4 | 660122 |
| C7YRV2 | 660122 |
| C7ZH37 | 660122 |
| C8V6G4 | 227321 |
| C8V6Q6 | 227321 |
| C8VPK7 | 227321 |
| C8Z427 | 643680 |
| C8Z799 | 643680 |
| C8ZBW2 | 643680 |
| C9SF28 | 526221 |
| D0MT19 | 403677 |
| D0N7P9 | 403677 |
| D1ZRE9 | 5147   |
| D2VDG8 | 5762   |
| D3B961 | 670386 |
| D3DLZ2 | 559292 |
| D4AVK5 | 663331 |
| D4DDK1 | 663202 |
| D5GA40 | 39416  |
| D6VQV4 | 559292 |
| D6VWY5 | 559292 |
| D6WSN2 | 7070   |
| D7L8V0 | 81972  |
| D7LZN3 | 81972  |
| O42615 | 37620  |
| O59791 | 4896   |
| O94634 | 4896   |

|        |        |
|--------|--------|
| P00927 | 4932   |
| P25306 | 4081   |
| P25379 | 4932   |
| P36007 | 4932   |
| Q0CLL4 | 341663 |
| Q0CLP5 | 341663 |
| Q0CS26 | 341663 |
| Q0CTG7 | 341663 |
| Q0U0P1 | 13684  |
| Q0V4E4 | 13684  |
| Q10DZ5 | 39947  |
| Q17F43 | 7159   |
| Q17F44 | 7159   |
| Q21080 | 6239   |
| Q22B57 | 312017 |
| Q23ML3 | 312017 |
| Q23WP3 | 312017 |
| Q29BL4 | 46245  |
| Q2GMH0 | 38033  |
| Q2HGP8 | 38033  |
| Q2PGG3 | 3702   |
| Q2TYD7 | 5062   |
| Q2U839 | 5062   |
| Q2UGM2 | 5062   |
| Q2UGQ4 | 5062   |
| Q2UUE9 | 5062   |
| Q39469 | 3827   |
| Q4P450 | 5270   |
| Q4QJ04 | 5664   |
| Q4WJF6 | 5085   |
| Q4WP28 | 5085   |
| Q4WP60 | 5085   |
| Q4WYW2 | 5085   |
| Q55JX2 | 5207   |
| Q59P56 | 5476   |
| Q5B5G3 | 162425 |
| Q5B6G4 | 162425 |
| Q5B6K0 | 162425 |
| Q5BAA5 | 162425 |
| Q5K9M8 | 5207   |
| Q6BMV7 | 4959   |
| Q6CAI4 | 4952   |
| Q6CE17 | 4952   |
| Q6CMJ3 | 28985  |
| Q6CPW0 | 28985  |
| Q6FQM1 | 5478   |

|        |       |
|--------|-------|
| Q6JAG1 | 4558  |
| Q751S7 | 33169 |
| Q75BN9 | 33169 |
| Q7PQF6 | 7165  |
| Q7S456 | 5141  |
| Q7XSN8 | 39947 |
| Q86AP7 | 44689 |
| Q86QZ7 | 5741  |
| Q86ZL8 | 5145  |
| Q8GUG5 | 3702  |
| Q8GW70 | 3702  |
| Q8W314 | 39947 |
| Q8X0J0 | 5141  |
| Q95XY8 | 6239  |
| Q9AUQ1 | 4530  |
| Q9AXU4 | 49451 |
| Q9T0D1 | 3702  |
| Q9VHF0 | 7227  |
| Q9ZSS6 | 3702  |

| <b>acetolactate synthase</b> |             | <b>ketol-acid reductoisomerase</b> |             | <b>dihydroxy-acid dehydratase</b> |             |
|------------------------------|-------------|------------------------------------|-------------|-----------------------------------|-------------|
| <b>UniProt</b>               | <b>TXID</b> | <b>UniProt</b>                     | <b>TXID</b> | <b>UniProt</b>                    | <b>TXID</b> |
| A0A174                       | 3702        | Q05758                             | 3702        | P39522                            | 4932        |
| A0PCE4                       | 44972       | D7LW57                             | 81972       | D6VWJ2                            | 559292      |
| A1CH32                       | 5057        | A5AGN5                             | 29760       | D3UF79                            | 643680      |
| A1CKD6                       | 5057        | B9H2U7                             | 3694        | B3LQB4                            | 285006      |
| A1CMZ4                       | 5057        | B9N3F9                             | 3694        | A6ZPY4                            | 307796      |
| A1CXQ6                       | 331117      | O82043                             | 3888        | C7GWK6                            | 574961      |
| A1D0U4                       | 331117      | Q9SM58                             | 3888        | A7TET1                            | 436907      |
| A1D735                       | 331117      | B9S999                             | 3988        | Q6FXQ1                            | 5478        |
| A1L0T0                       | 9606        | B9SGJ6                             | 3988        | Q6CJ26                            | 28985       |
| A1Z0Y7                       | 277990      | D6QSY0                             | 4058        | C5DCB1                            | 559295      |
| A1Z0Y8                       | 277990      | B5LAT1                             | 4072        | C5DSB2                            | 559307      |
| A1Z0Y9                       | 277990      | D2DKE6                             | 3847        | C5E0C7                            | 559307      |
| A1Z0Z0                       | 277990      | Q01292                             | 3562        | Q75CN6                            | 33169       |
| A2Q4R2                       | 3880        | C5XF87                             | 4558        | A5DB65                            | 4929        |
| A2QFR5                       | 425011      | C5YW13                             | 4558        | B9WI83                            | 573826      |
| A2R7N6                       | 425011      | B6TF69                             | 4577        | C5MJA4                            | 294747      |
| A2XSS8                       | 39946       | B4FFZ2                             | 4577        | C4YS49                            | 5476        |
| A2XST3                       | 39946       | C0PC62                             | 4577        | Q5AJY2                            | 5476        |
| A3BBP3                       | 39947       | Q65XK0                             | 39947       | A5E395                            | 36914       |
| A3GGC4                       | 4924        | B9FLQ7                             | 39947       | A3LQP2                            | 4924        |
| A3LUG6                       | 4924        | A2ZW27                             | 39947       | Q6BRS8                            | 4959        |
| A4R1P9                       | 148305      | Q5VPB9                             | 39947       | C4QYI7                            | 644223      |
| A4R4K6                       | 148305      | B8AWV4                             | 39946       | Q6CAY2                            | 4952        |
| A4S4D9                       | 436017      | A9TGX1                             | 145481      | B2WHE3                            | 426418      |

|        |        |        |        |        |        |
|--------|--------|--------|--------|--------|--------|
| A4S8I1 | 436017 | A9TQQ1 | 145481 | B6K5X3 | 402676 |
| A4SAU4 | 436017 | C1E3E5 | 296587 | A7EU45 | 665079 |
| A4UYK6 | 63789  | Q01CQ3 | 70448  | Q0U5T0 | 13684  |
| A5AAL4 | 425011 | A8IAT4 | 3055   | A2QGU4 | 425011 |
| A5AT84 | 29760  | C1N3E5 | 564608 | A2RAB2 | 425011 |
| A5BKL2 | 29760  | A4RUC7 | 436017 | A2R373 | 425011 |
| A5DBM1 | 4929   | D7FQZ4 | 2880   | D5GLK3 | 39416  |
| A5DED0 | 4929   | B8C486 | 35128  | B8M7R3 | 441959 |
| A5DYQ1 | 36914  | B7GDA6 | 556484 | A6SA17 | 332648 |
| A5E3P3 | 36914  | B7S3L8 | 556484 | A1D0V8 | 331117 |
| A5X2Z8 | 39946  | B8LR30 | 3332   | A1D5V5 | 331117 |
| A5X2Z9 | 39946  | D0MXI4 | 403677 | A1DHX3 | 331117 |
| A5X300 | 39946  | Q5KFA0 | 5207   | B6Q502 | 441960 |
| A5X301 | 39946  | Q96VZ5 | 5207   | Q0CPG9 | 341663 |
| A5X302 | 39946  | A8NTG0 | 240176 | Q0CZ04 | 341663 |
| A6MVU2 | 52970  | B0D9T8 | 486041 | Q2UBS1 | 5062   |
| A6MW39 | 52970  | C5PCI0 | 222929 | Q2UIB0 | 5062   |
| A6QQT9 | 9913   | Q2U860 | 5062   | B8N7B7 | 332952 |
| A6QRU8 | 339724 | B8NEC1 | 332952 | B8N7W8 | 332952 |
| A6R7H6 | 339724 | C1L3C1 | 5127   | Q872F8 | 5141   |
| A6RUW4 | 332648 | C5GRI3 | 559297 | C7Z247 | 660122 |
| A6RW42 | 332648 | C7YRV3 | 660122 | A4RNV7 | 148305 |
| A6ZMG5 | 307796 | Q75CW4 | 33169  | Q2GXE7 | 38033  |
| A6ZTH5 | 307796 | C4JWT6 | 336963 | B6HUP3 | 500485 |
| A7EF35 | 665079 | B2B4E9 | 5145   | Q10318 | 4896   |
| A7EMK2 | 665079 | C6HPI3 | 544712 | B2B590 | 5145   |
| A7LIU5 | 28502  | B2VW72 | 426418 | B0XTT1 | 451804 |
| A7TQ79 | 436907 | A1CLE8 | 5057   | Q4X099 | 5085   |
| A7TSL6 | 436907 | D1ZDQ2 | 5147   | C5FMZ6 | 554155 |
| A8J1U3 | 3055   | P38674 | 5141   | C5PC55 | 222929 |
| A8N6M2 | 240176 | C5M977 | 294747 | C4JX57 | 336963 |
| A8NDY7 | 240176 | A6RUK2 | 332648 | A1C7D3 | 5057   |
| A8NDZ1 | 240176 | C0NZL2 | 447093 | Q5AZD4 | 162425 |
| A8PUD2 | 425265 | A7EEW5 | 665079 | C8V0Z3 | 227321 |
| A8PX99 | 425265 | A2QU08 | 425011 | C5JSR5 | 559298 |
| A9RF63 | 145481 | P78827 | 4896   | C5GDN4 | 559297 |
| A9RWH6 | 145481 | B6QVU9 | 441960 | D0MU74 | 403677 |
| A9S0R7 | 145481 | C1GGJ2 | 502780 | D0P3A5 | 403677 |
| A9T869 | 145481 | C0SHC8 | 482561 | C1GNB9 | 502779 |
| B0D8X6 | 486041 | Q4P572 | 5270   | A6R2Z2 | 339724 |
| B0DQ58 | 486041 | Q0CS25 | 341663 | C0NA31 | 447093 |
| B0FBK3 | 75626  | B6H313 | 500485 | C1GJ05 | 502780 |
| B0FBK4 | 75626  | Q5BAA4 | 162425 | A8QAI2 | 425265 |
| B0FBK5 | 3880   | C8VPK8 | 227321 | D4DK18 | 663202 |
| B0FBK6 | 3880   | A4RJJ1 | 148305 | A9SVA5 | 145481 |
| B0JZX6 | 8364   | Q59WW5 | 5476   | A8NSD6 | 240176 |

|        |        |        |        |        |        |
|--------|--------|--------|--------|--------|--------|
| B0XXW9 | 451804 | Q59XR8 | 5476   | C6HKE7 | 544712 |
| B0Y5R3 | 451804 | D4AX03 | 663331 | Q5KCL8 | 5207   |
| B1X3H1 | 39717  | D4CZD1 | 663202 | C5YN64 | 4558   |
| B1X5T2 | 39717  | B9WIG8 | 573826 | A4RUR5 | 436017 |
| B2AZC0 | 5145   | C9S595 | 526221 | Q6YZH8 | 39947  |
| B2B064 | 5145   | D5GPG5 | 39416  | A2YY43 | 39946  |
| B2G4B6 | 4956   | A8Q731 | 425265 | B9RWL5 | 3988   |
| B2W1S1 | 426418 | Q6CAF8 | 4952   | B8C011 | 35128  |
| B2WES1 | 426418 | O94135 | 73868  | D2DKF0 | 3847   |
| B2XT33 | 536047 | B6JVI5 | 402676 | B0CVQ3 | 486041 |
| B2XT40 | 536047 | A3LUW4 | 4924   | C0P869 | 4577   |
| B2XTI9 | 536046 | C4XZU7 | 306902 | B4FWX5 | 4577   |
| B2XTJ6 | 536046 | A5E4Z1 | 36914  | B9H085 | 3694   |
| B3LLZ9 | 285006 | Q6CY71 | 28985  | B9GMG3 | 3694   |
| B3LU66 | 285006 | C4QX36 | 644223 | C1MJD7 | 564608 |
| B3RKI2 | 10228  | C5DNI3 | 559295 | Q9LIR4 | 3702   |
| B3U3M8 | 39946  | B5VNP5 | 545124 | Q94BS6 | 3702   |
| B4G0C6 | 4577   | Q0UNT9 | 13684  | D7L507 | 81972  |
| B5A9S4 | 50193  | P06168 | 4932   | C1DZG4 | 296587 |
| B5A9S5 | 50193  | D6VYZ3 | 559292 | Q4P2C3 | 5270   |
| B5LAT2 | 4072   | C8ZDW2 | 643680 | A8IX80 | 3055   |
| B5VPN3 | 545124 | B3RHM4 | 285006 | B8PA25 | 561896 |
| B5X226 | 8030   | A7A1N3 | 307796 | C0SBK0 | 482561 |
| B6H4R2 | 500485 | C7GRY0 | 574961 | D4AJM2 | 663331 |
| B6HUL3 | 500485 | A7THN4 | 436907 | D1ZAT5 | 5147   |
| B6HVF8 | 500485 | Q6BLZ4 | 4959   | Q5K661 | 121759 |
| B6K5L0 | 402676 | B8MTE6 | 441959 | C9SSD1 | 526221 |
| B6Q1J9 | 441960 | A6RGX3 | 339724 | A8N737 | 240176 |
| B6Q3W1 | 441960 | Q4WYW4 | 5085   | Q01CC3 | 70448  |
| B6QBQ1 | 441960 | B0XZX8 | 451804 | A1C7W6 | 5057   |
| B6TXK4 | 4577   | A1D5X2 | 331117 | A1CQT3 | 5057   |
| B6U4G3 | 4577   | B4FA74 | 4577   | A1CRV3 | 5057   |
| B7G2T9 | 556484 | C5DRF8 | 559307 | A1D3P6 | 331117 |
| B7T1U0 | 109269 | Q6FXG6 | 5478   | A1D4R0 | 331117 |
| B7T1Y6 | 109269 | A2WTA6 | 39946  | A1DII9 | 331117 |
| B7ZZM4 | 4577   | B1X3L2 | 39717  | A2QPL6 | 425011 |
| B8AFH3 | 39946  | B7FLH4 | 3880   | A2R655 | 425011 |
| B8BJX9 | 39946  | B9DH71 | 3702   | A2RAS2 | 425011 |
| B8C663 | 35128  | C1GX30 | 502779 | A4R3M5 | 148305 |
| B8LK99 | 3332   | C4J776 | 4577   | A7EU65 | 665079 |
| B8LTV0 | 441959 | C5FMW7 | 554155 | A7RMM9 | 45351  |
| B8M3I0 | 441959 | Q02340 | 4932   | B2AEH4 | 5145   |
| B8M7J7 | 441959 | Q02341 | 4932   | B6H1J6 | 500485 |
| B8N1U6 | 332952 | Q56WU3 | 3702   | B6HQ90 | 500485 |
| B8N9W8 | 332952 |        |        | B8NQW9 | 332952 |
| B8NE74 | 332952 |        |        | B8NRS2 | 332952 |

|        |        |        |        |
|--------|--------|--------|--------|
| B8NPM9 | 332952 | B8NVE1 | 332952 |
| B8QGD3 | 83154  | C4JJJ2 | 336963 |
| B8QGD4 | 83154  | C4Y276 | 306902 |
| B8QGD5 | 83154  | C8VCJ2 | 227321 |
| B8QGD8 | 83154  | C8VF01 | 227321 |
| B8QGD9 | 83154  | Q0V613 | 13684  |
| B8QGE2 | 83154  | Q2TXQ3 | 5062   |
| B8QGE4 | 83154  | Q2UAU5 | 5062   |
| B8QGE6 | 83154  | Q2UU88 | 5062   |
| B8QGE9 | 83154  | Q4WJ40 | 5085   |
| B8QGF0 | 83154  | Q4WK65 | 5085   |
| B8QGF5 | 83154  | Q4WZN7 | 5085   |
| B8QGF7 | 83154  | Q5KEP2 | 5207   |
| B8QGF8 | 83154  | Q7SBQ5 | 5141   |
| B8QGF9 | 83154  | A2QXK2 | 425011 |
| B8QGG2 | 83154  | A4RCZ6 | 148305 |
| B8QGG3 | 83154  | A4UBS4 | 148305 |
| B8QGG4 | 83154  | A6R4L9 | 339724 |
| B8QGG6 | 83154  | A6S9Z9 | 332648 |
| B9DFL8 | 3702   | A9V147 | 81824  |
| B9F068 | 39947  | B0D0Q9 | 486041 |
| B9F104 | 39947  | B0XN07 | 451804 |
| B9FEW3 | 39947  | B0XPV2 | 451804 |
| B9HGI0 | 3694   | B0XUZ5 | 451804 |
| B9HYF8 | 3694   | B1X452 | 39717  |
| B9IFC5 | 3694   | B2WL59 | 426418 |
| B9NI63 | 3694   | B6Q2T5 | 441960 |
| B9RAF1 | 3988   | B6QIE5 | 441960 |
| B9RM03 | 3988   | B6QKY2 | 441960 |
| B9SV00 | 3988   | B8MKQ3 | 441959 |
| B9WDK1 | 573826 | B8MPX6 | 441959 |
| B9WFK0 | 573826 | B9P5K9 | 3694   |
| C0HIZ0 | 4577   | C0NBL4 | 447093 |
| C0L093 | 4097   | C0SF90 | 482561 |
| C0LL34 | 89411  | C1GK23 | 502780 |
| C0NIU4 | 447093 | C1H4T6 | 502779 |
| C0NU24 | 447093 | C5FT56 | 554155 |
| C0PJP3 | 4577   | C5GD80 | 559297 |
| C0PKS4 | 4577   | C5JQP4 | 559298 |
| C0S393 | 482561 | C5P1G6 | 222929 |
| C0SIR4 | 482561 | C6H9W2 | 544712 |
| C1EI66 | 296587 | C7Z2V6 | 660122 |
| C1FJR3 | 296587 | C7Z808 | 660122 |
| C1G117 | 502780 | C7Z9A5 | 660122 |
| C1GLR3 | 502780 | C8V5I0 | 227321 |
| C1GTN7 | 502779 | C9SCM6 | 526221 |

|        |        |        |        |
|--------|--------|--------|--------|
| C1HAF1 | 502779 | D4AWX6 | 663331 |
| C1N612 | 564608 | D5GG74 | 39416  |
| C3Y067 | 7739   | Q0C814 | 341663 |
| C4B808 | 258217 | Q0CC82 | 341663 |
| C4JW49 | 336963 | Q0CT86 | 341663 |
| C4JYW2 | 336963 | Q0CVG7 | 341663 |
| C4R141 | 644223 | Q2H7J0 | 38033  |
| C4R783 | 644223 | Q2HCA1 | 38033  |
| C4Y185 | 306902 | Q2TV70 | 4905   |
| C4Y297 | 306902 | Q4PA83 | 5270   |
| C4YHU4 | 5476   | Q5AWH2 | 162425 |
| C5DGD9 | 559295 | Q5B2U2 | 162425 |
| C5E1C8 | 559307 | Q5B5X2 | 162425 |
| C5E3D1 | 559295 |        |        |
| C5E4D3 | 559307 |        |        |
| C5FDR2 | 554155 |        |        |
| C5FF05 | 554155 |        |        |
| C5G9R2 | 559297 |        |        |
| C5GE50 | 559297 |        |        |
| C5H4D6 | 316505 |        |        |
| C5H4D7 | 316505 |        |        |
| C5H4D9 | 316505 |        |        |
| C5JJ85 | 559298 |        |        |
| C5JY03 | 559298 |        |        |
| C5KW14 | 423536 |        |        |
| C5L187 | 423536 |        |        |
| C5LR47 | 423536 |        |        |
| C5M292 | 294747 |        |        |
| C5MA99 | 294747 |        |        |
| C5P8T8 | 222929 |        |        |
| C5P9U4 | 222929 |        |        |
| C5XSM1 | 4558   |        |        |
| C5XX95 | 4558   |        |        |
| C5Y7K7 | 4558   |        |        |
| C6H1H6 | 544712 |        |        |
| C6H869 | 544712 |        |        |
| C6KIN9 | 44056  |        |        |
| C6KIS8 | 44056  |        |        |
| C6KIX7 | 44058  |        |        |
| C6KJ25 | 44058  |        |        |
| C7GQK9 | 574961 |        |        |
| C7GWA1 | 574961 |        |        |
| C7YPF2 | 660122 |        |        |
| C7Z3H6 | 660122 |        |        |
| C7ZKR1 | 660122 |        |        |
| C8V8Q9 | 227321 |        |        |

|        |        |
|--------|--------|
| C8V916 | 227321 |
| C8Z476 | 643680 |
| C8ZEW1 | 643680 |
| C9E7B6 | 3885   |
| C9K5V0 | 309978 |
| C9S7Q1 | 526221 |
| C9SAN7 | 526221 |
| D0MX38 | 403677 |
| D0N068 | 403677 |
| D1ZA93 | 5147   |
| D1ZFR7 | 5147   |
| D2IS67 | 2898   |
| D3JJ57 | 3708   |
| D3K640 | 29788  |
| D4ACG2 | 10116  |
| D4AMM1 | 663331 |
| D4AZH5 | 663331 |
| D4D5L6 | 663202 |
| D4D8X1 | 663202 |
| D5G405 | 39416  |
| D5GK65 | 39416  |
| D6VR03 | 559292 |
| D6VZT1 | 559292 |
| D7LDP8 | 81972  |
| D7LRY3 | 81972  |
| D7M833 | 81972  |
| D7QYK8 | 29788  |
| D7RPJ7 | 4113   |
| O13331 | 148305 |
| O19929 | 2771   |
| O22026 | 45157  |
| O22035 | 2771   |
| O22547 | 3055   |
| O22578 | 3067   |
| O49210 | 3067   |
| O49229 | 3055   |
| O60086 | 4896   |
| O61856 | 6239   |
| O63181 | 77580  |
| O78451 | 55529  |
| O78518 | 55529  |
| P07342 | 4932   |
| P09114 | 4097   |
| P09342 | 4097   |
| P14874 | 3708   |
| P17597 | 3702   |



|        |        |
|--------|--------|
| P25605 | 4932   |
| P27818 | 3708   |
| P27819 | 3708   |
| P36620 | 4896   |
| P51230 | 2787   |
| P69683 | 2787   |
| P69684 | 2786   |
| P78995 | 27292  |
| Q00U23 | 70448  |
| Q00WB5 | 70448  |
| Q00ZA1 | 70448  |
| Q01154 | 148305 |
| Q01LD9 | 4530   |
| Q05767 | 3708   |
| Q0CD88 | 341663 |
| Q0CLE4 | 341663 |
| Q0CP19 | 341663 |
| Q0CTB6 | 341663 |
| Q0E0Z3 | 39947  |
| Q0TZT5 | 13684  |
| Q0UJB2 | 13684  |
| Q0USR1 | 13684  |
| Q14TG2 | 280076 |
| Q14TG4 | 280076 |
| Q1XDF6 | 2788   |
| Q1XDQ7 | 2788   |
| Q2GNZ0 | 38033  |
| Q2GZN0 | 38033  |
| Q2PDK3 | 81473  |
| Q2U9N8 | 5062   |
| Q2UGG1 | 5062   |
| Q2UL29 | 5062   |
| Q2WFB4 | 44972  |
| Q2WFB5 | 44972  |
| Q2WFB8 | 44972  |
| Q2WFB9 | 44972  |
| Q38795 | 47306  |
| Q3E6W5 | 3702   |
| Q3EBQ7 | 3702   |
| Q41716 | 36591  |
| Q41717 | 36591  |
| Q41768 | 4577   |
| Q41769 | 4577   |
| Q42767 | 3635   |
| Q42768 | 3635   |
| Q4P4E2 | 5270   |

|        |        |
|--------|--------|
| Q4P9H4 | 5270   |
| Q4WNW7 | 5085   |
| Q4WXQ3 | 5085   |
| Q53L28 | 39947  |
| Q560J9 | 5207   |
| Q5AJI0 | 5476   |
| Q5AJV7 | 5476   |
| Q5AMJ6 | 5476   |
| Q5AN02 | 5476   |
| Q5B3C4 | 162425 |
| Q5B4V0 | 162425 |
| Q5K716 | 5207   |
| Q5KPJ5 | 5207   |
| Q5VB42 | 4232   |
| Q5VB43 | 4232   |
| Q5VB44 | 4232   |
| Q5VB45 | 4232   |
| Q5VB46 | 4232   |
| Q5VB47 | 4232   |
| Q5VB48 | 4232   |
| Q5VB49 | 4232   |
| Q6B8N6 | 285951 |
| Q6B8Z2 | 285951 |
| Q6BJI8 | 4959   |
| Q6BNH8 | 4959   |
| Q6CCG2 | 4952   |
| Q6CDI5 | 4952   |
| Q6CKA0 | 28985  |
| Q6CVE8 | 28985  |
| Q6FN19 | 5478   |
| Q6FS30 | 5478   |
| Q6K1X7 | 39947  |
| Q6K2E8 | 39947  |
| Q6NV04 | 7955   |
| Q6T858 | 71324  |
| Q6T859 | 71324  |
| Q6T860 | 71324  |
| Q758Q8 | 33169  |
| Q75ET7 | 33169  |
| Q7RVY3 | 5141   |
| Q7X9G4 | 33128  |
| Q7XKQ8 | 39947  |
| Q85FZ7 | 45157  |
| Q85G80 | 45157  |
| Q8BU33 | 10090  |
| Q8L7Y7 | 3702   |

|        |        |
|--------|--------|
| Q8NJ49 | 4944   |
| Q93XN5 | 158579 |
| Q93XN6 | 124763 |
| Q93YZ7 | 3702   |
| Q94B64 | 3702   |
| Q96V04 | 148305 |
| Q96VZ6 | 5207   |
| Q9FFF4 | 3702   |
| Q9FUD0 | 4521   |
| Q9MS98 | 130081 |
| Q9P6B4 | 5141   |
| Q9SKB9 | 3702   |
| Q9SMC2 | 4092   |
| Q9TLY1 | 2771   |
| Q9ZSU3 | 83154  |

**branched-chain amino acid aminotransferase**

| UniProt | TXID   |
|---------|--------|
| A0CQD8  | 5888   |
| A0CWV8  | 5888   |
| A0DHX8  | 5888   |
| A0DP04  | 5888   |
| A0DQ59  | 5888   |
| A0E905  | 5888   |
| A0E931  | 5888   |
| A1C693  | 5057   |
| A1CCC2  | 5057   |
| A1CFM6  | 5057   |
| A1CGS8  | 5057   |
| A1CSC6  | 5057   |
| A1CY02  | 331117 |
| A1D591  | 331117 |
| A1DGW8  | 331117 |
| A2DZ77  | 5722   |
| A2E498  | 5722   |
| A2Q939  | 425011 |
| A2QD81  | 425011 |
| A2QHM8  | 425011 |
| A2QTG2  | 425011 |
| A2QV14  | 425011 |
| A2WML4  | 39946  |
| A2XBJ1  | 39946  |
| A2XE78  | 39946  |
| A2Y2A9  | 39946  |
| A2ZA03  | 39946  |
| A3AD92  | 39947  |

**2-isopropylmalate synthase**

| UniProt | TXID   |
|---------|--------|
| A1CHY9  | 5057   |
| A1CNV7  | 5057   |
| A1CWS1  | 331117 |
| A1D1R7  | 331117 |
| A2QAX8  | 425011 |
| A2QJ88  | 425011 |
| A3GFB4  | 4924   |
| A3GGR1  | 4924   |
| A3LU20  | 4924   |
| A3LUA5  | 4924   |
| A4QR67  | 148305 |
| A4RD53  | 148305 |
| A4RRV6  | 436017 |
| A5DCX1  | 4929   |
| A5DDX9  | 4929   |
| A5DEU6  | 4929   |
| A5DK19  | 4929   |
| A5DUL2  | 36914  |
| A5DVS2  | 36914  |
| A5DWR8  | 36914  |
| A5DYI7  | 36914  |
| A6QYH1  | 339724 |
| A6RAW0  | 339724 |
| A6S6B4  | 332648 |
| A6SEV6  | 332648 |
| A6ZNV6  | 307796 |
| A6ZRX6  | 307796 |
| A6ZXE9  | 307796 |

**3-isopropylmalate dehydrogenase**

| UniProt | TXID   |
|---------|--------|
| A1CNN3  | 5057   |
| A1CUK0  | 5057   |
| A1D1I2  | 331117 |
| A1DP80  | 331117 |
| A2QB74  | 425011 |
| A2QKC6  | 425011 |
| A2XK82  | 39946  |
| A3AL03  | 39947  |
| A4QSZ8  | 148305 |
| A4QUQ9  | 148305 |
| A4SBH9  | 436017 |
| A4Z4U6  | 4911   |
| A5DLX7  | 4929   |
| A5E7H0  | 36914  |
| A6QY03  | 339724 |
| A6RDC6  | 339724 |
| A6SPE0  | 332648 |
| A6ZTG8  | 307796 |
| A7EP53  | 665079 |
| A7TGM5  | 436907 |
| A8DWH8  | 45351  |
| A8I7N4  | 3055   |
| A8I7N8  | 3055   |
| A8NYJ8  | 240176 |
| A8PVM0  | 425265 |
| A9RIX2  | 145481 |
| A9YTV4  | 119927 |
| B0CXS4  | 486041 |

|        |        |        |        |        |        |
|--------|--------|--------|--------|--------|--------|
| A3C731 | 39947  | A6ZXJ7 | 307796 | B0XM71 | 451804 |
| A3LNY1 | 4924   | A7F9C4 | 665079 | B0XN19 | 451804 |
| A3LVU4 | 4924   | A7F9M5 | 665079 | B2AWZ1 | 5145   |
| A4HFX0 | 5660   | A7TF22 | 436907 | B2WKF7 | 426418 |
| A4I2W8 | 5671   | A7TNA0 | 436907 | B2ZBW4 | 27301  |
| A4IFQ7 | 9913   | A8NEF9 | 240176 | B5LAV1 | 4072   |
| A4R037 | 148305 | A8NU10 | 240176 | B5VET6 | 545124 |
| A4R2M4 | 148305 | A8PWG4 | 425265 | B6HAM6 | 500485 |
| A4RDL3 | 148305 | A8QCA5 | 425265 | B6HPJ8 | 500485 |
| A4RWN3 | 436017 | A9S4K9 | 145481 | B6K4K0 | 402676 |
| A4S1G0 | 436017 | A9T9B8 | 145481 | B6QBS6 | 441960 |
| A4SB33 | 436017 | B0D9Z2 | 486041 | B6THR9 | 4577   |
| A5DGQ7 | 4929   | B0XN47 | 451804 | B6TVD6 | 4577   |
| A5DUJ5 | 36914  | B0Y6N3 | 451804 | B7FHQ0 | 3880   |
| A5DY11 | 36914  | B1X5H2 | 39717  | B7G1X8 | 556484 |
| A6R0Z5 | 339724 | B2AQI3 | 5145   | B8C2I2 | 35128  |
| A6RH28 | 339724 | B2AUM7 | 5145   | B8M1Y5 | 441959 |
| A6RI10 | 332648 | B2D157 | 3712   | B8M3W0 | 441959 |
| A6S587 | 332648 | B2WGW9 | 426418 | B8MZ75 | 332952 |
| A6SCW1 | 332648 | B2WKN1 | 426418 | B8NXT4 | 332952 |
| A6SP39 | 332648 | B3LH22 | 285006 | B8PNS1 | 561896 |
| A6ZQA4 | 307796 | B3LH66 | 285006 | B9GG50 | 3694   |
| A6ZTB5 | 307796 | B3LJF1 | 285006 | B9SWT3 | 3988   |
| A7ENI6 | 665079 | B3LNW3 | 285006 | B9WJH1 | 573826 |
| A7EYY1 | 665079 | B5KJ60 | 51350  | C0NEM8 | 447093 |
| A7F5D9 | 665079 | B5KJ62 | 51351  | C0NYY5 | 447093 |
| A7SLW1 | 45351  | B5LAV3 | 4072   | C0PD04 | 4577   |
| A7TPV1 | 436907 | B5VF91 | 545124 | C0SED7 | 482561 |
| A7TT81 | 436907 | B5VRZ8 | 545124 | C1EFQ3 | 296587 |
| A8BLB2 | 184922 | B6HIA0 | 500485 | C1GHD5 | 502780 |
| A8HT91 | 3055   | B6K1B6 | 402676 | C1H3I5 | 502779 |
| A8I0S9 | 3055   | B6K7H6 | 402676 | C1L3C2 | 5127   |
| A8I7X6 | 3055   | B6QAU4 | 441960 | C1MWL6 | 564608 |
| A8N0V2 | 240176 | B6QAU5 | 441960 | C4JGP0 | 336963 |
| A8PXF5 | 6279   | B6QPX9 | 441960 | C4JIA5 | 336963 |
| A8PZH7 | 425265 | B6SH97 | 4577   | C4R3D0 | 644223 |
| A8WM75 | 6238   | B6SWM0 | 4577   | C4YB62 | 306902 |
| A8X039 | 6238   | B6SWN1 | 4577   | C4YTB1 | 5476   |
| A9JS68 | 8355   | B7FFB9 | 3880   | C5E3C4 | 559295 |
| A9NN10 | 3332   | B7FLQ1 | 3880   | C5FBH4 | 554155 |
| A9RS79 | 145481 | B7FUP6 | 556484 | C5GME9 | 559297 |
| A9SPS3 | 145481 | B7G5N8 | 556484 | C5GYE1 | 559297 |
| A9SY36 | 145481 | B8A2E9 | 4577   | C5JY74 | 559298 |
| A9SZC8 | 145481 | B8BJ19 | 39946  | C5K2Z8 | 559298 |
| A9T3K1 | 145481 | B8BLZ1 | 39946  | C5MFT1 | 294747 |
| A9U6P0 | 145481 | B8BRI7 | 296543 | C5P3K3 | 222929 |

|        |        |        |        |        |        |
|--------|--------|--------|--------|--------|--------|
| A9UZ24 | 81824  | B8C732 | 35128  | C5P893 | 222929 |
| B0CPH7 | 486041 | B8LWR9 | 441959 | C5YB10 | 4558   |
| B0E9E9 | 370354 | B8M2U2 | 441959 | C6H5A5 | 544712 |
| B0X8N7 | 7176   | B8MZH6 | 332952 | C6HNJ4 | 544712 |
| B0XR4D | 451804 | B8N0W8 | 332952 | C6TGV1 | 3847   |
| B0XS77 | 451804 | B8NK98 | 332952 | C6TKN3 | 3847   |
| B0Y5G1 | 451804 | B8PD45 | 561896 | C7GQK2 | 574961 |
| B1X3T0 | 39717  | B9SX30 | 3988   | C7ZET2 | 660122 |
| B2AAZ8 | 5145   | B9W6H7 | 573826 | C7ZPF5 | 660122 |
| B2AR54 | 5145   | B9W7P6 | 573826 | C8VJK4 | 227321 |
| B2B756 | 5145   | B9WBB7 | 573826 | C8VUR0 | 227321 |
| B2DBI4 | 66420  | B9WCP0 | 573826 | C8Z469 | 643680 |
| B2KFA0 | 10090  | C0NF36 | 447093 | C9K7B7 | 5599   |
| B2KFA1 | 10090  | C0NMX2 | 447093 | C9SV85 | 526221 |
| B2KFA2 | 10090  | C0P8I4 | 4577   | C9SYQ0 | 526221 |
| B2VTC9 | 426418 | C0S541 | 482561 | D0N196 | 403677 |
| B2VZK6 | 426418 | C0SDV3 | 482561 | D0V7M9 | 199306 |
| B2W177 | 426418 | C1FID7 | 296587 | D1ZPB1 | 5147   |
| B2WPB1 | 426418 | C1G3U9 | 502780 | D4B107 | 663331 |
| B3H658 | 3702   | C1GHU8 | 502780 | D4DIX5 | 663202 |
| B3KSI3 | 9606   | C1H3Y8 | 502779 | D5GE49 | 39416  |
| B3KY27 | 9606   | C1H8B2 | 502779 | D6VQZ6 | 559292 |
| B3LQM7 | 285006 | C1N4J5 | 564608 | D7KM07 | 81972  |
| B3LSW9 | 285006 | C4J3S6 | 4577   | D7KX44 | 81972  |
| B3MXN6 | 7217   | C4JRR1 | 336963 | D7KX45 | 81972  |
| B3NWN8 | 7220   | C4JY82 | 336963 | D7M613 | 81972  |
| B3SBH7 | 10228  | C4QWR7 | 644223 | O14429 | 5478   |
| B4F9X9 | 4577   | C4QYE7 | 644223 | O59930 | 5306   |
| B4FA16 | 4577   | C4R0L2 | 644223 | O60027 | 33169  |
| B4FB06 | 4577   | C4XX33 | 306902 | O94114 | 4924   |
| B4FD32 | 4577   | C4XZ37 | 306902 | P04173 | 4932   |
| B4FQ91 | 4577   | C4Y5K7 | 306902 | P07139 | 5479   |
| B4H2W7 | 7234   | C4YAG2 | 306902 | P08791 | 4903   |
| B4IGS4 | 7238   | C4YFW0 | 5476   | P18120 | 4952   |
| B4JLQ2 | 7222   | C4YKP2 | 5476   | P18869 | 4896   |
| B4L1S1 | 7230   | C5DGX9 | 559295 | P23390 | 28985  |
| B4MEI3 | 7244   | C5DII8 | 559295 | P29102 | 3708   |
| B4NEH1 | 7260   | C5DP09 | 559307 | P34733 | 4905   |
| B4NVP8 | 7240   | C5DRM6 | 559307 | P34738 | 5141   |
| B4Q2B4 | 7245   | C5DT42 | 559307 | P41766 | 4911   |
| B5VLT5 | 545124 | C5DTL1 | 559307 | P41926 | 34356  |
| B5X837 | 8030   | C5E265 | 559295 | P87186 | 5476   |
| B6GY28 | 500485 | C5FUR8 | 554155 | P87256 | 5061   |
| B6HJE5 | 500485 | C5FUW4 | 554155 | P87257 | 5061   |
| B6HR72 | 500485 | C5GFR2 | 559297 | P93832 | 3702   |
| B6HRY8 | 500485 | C5GKV1 | 559297 | Q00VM0 | 70448  |

|        |        |        |        |        |        |
|--------|--------|--------|--------|--------|--------|
| B6HU88 | 500485 | C5H9M9 | 51351  | Q01987 | 5477   |
| B6K620 | 402676 | C5J4N7 | 3707   | Q0CM68 | 341663 |
| B6KTN2 | 508771 | C5J4N9 | 3707   | Q0CSC7 | 341663 |
| B6Q223 | 441960 | C5J4P1 | 3707   | Q0DPW7 | 39947  |
| B6QES1 | 441960 | C5JII3 | 559298 | Q12545 | 5044   |
| B6QEX8 | 441960 | C5K0P5 | 559298 | Q12590 | 5479   |
| B6QEX9 | 441960 | C5M530 | 294747 | Q12591 | 5479   |
| B6QUE3 | 441960 | C5M6W3 | 294747 | Q12592 | 5479   |
| B6RFK8 | 4100   | C5MDZ9 | 294747 | Q2HAA2 | 38033  |
| B6STR2 | 4577   | C5MF43 | 294747 | Q2TYA5 | 5062   |
| B6THP1 | 4577   | C5PAF9 | 222929 | Q2UQS4 | 5062   |
| B7FJP0 | 3880   | C5PCV6 | 222929 | Q2V379 | 3702   |
| B7FT57 | 556484 | C5Y4G6 | 4558   | Q2V380 | 3702   |
| B7FTZ3 | 556484 | C5YQI8 | 4558   | Q4PF68 | 5270   |
| B7P5K8 | 6945   | C6H2L0 | 544712 | Q4WLG7 | 5085   |
| B7Z2M5 | 9606   | C6HP01 | 544712 | Q4WRM6 | 5085   |
| B7Z5L0 | 9606   | C7GMM8 | 574961 | Q5AFI8 | 5476   |
| B8AFD4 | 39946  | C7YJ23 | 660122 | Q5B9I7 | 162425 |
| B8ASX0 | 39946  | C7YV47 | 660122 | Q5BEW8 | 162425 |
| B8AWI0 | 39946  | C8VL66 | 227321 | Q5F0I0 | 5479   |
| B8AZW6 | 39946  | C8VQ30 | 227321 | Q5KP37 | 5207   |
| B8BY53 | 35128  | C8Z6C2 | 643680 | Q5XF32 | 3702   |
| B8LQL0 | 3332   | C8Z6H2 | 643680 | Q6B458 | 4959   |
| B8LUG0 | 441959 | C8ZGC6 | 643680 | Q6PY58 | 51915  |
| B8LZT6 | 441959 | C8ZI69 | 643680 | Q6TWC4 | 5147   |
| B8MBA9 | 441959 | C9SFE9 | 526221 | Q7Y096 | 39947  |
| B8MBB0 | 441959 | C9SML8 | 526221 | Q877A9 | 5062   |
| B8MIC4 | 441959 | C9SR17 | 526221 | Q8GXH6 | 3702   |
| B8MQ34 | 441959 | D0MYD7 | 403677 | Q8LB97 | 3702   |
| B8MYP9 | 332952 | D0VY45 | 34305  | Q8LEF4 | 3702   |
| B8N7W4 | 332952 | D1ZKQ0 | 5147   | Q8NKB8 | 37620  |
| B8NA84 | 332952 | D2UXY9 | 5762   | Q96WI0 | 559307 |
| B8NB44 | 332952 | D4B0A2 | 663331 | Q96WT9 | 34358  |
| B8NC67 | 332952 | D4D4U1 | 663202 | Q9FMT1 | 3702   |
| B9DHH5 | 3702   | D4DIY3 | 663202 | Q9HDQ1 | 4927   |
| B9EUL1 | 39947  | D5GJ82 | 39416  | Q9HDQ5 | 5481   |
| B9F6M2 | 39947  | D5GJS6 | 39416  | Q9P3Y0 | 4954   |
| B9FBX6 | 39947  | D5KUG5 | 4932   | Q9P8C1 | 13684  |
| B9FNG3 | 39947  | D6VRH0 | 559292 | Q9SA14 | 3702   |
| B9FNG4 | 39947  | D6VRL8 | 559292 | Q9Y897 | 54734  |
| B9GNK4 | 3694   | D6W175 | 559292 |        |        |
| B9HFT9 | 3694   | D6W2G7 | 559292 |        |        |
| B9HN46 | 3694   | D7KGE8 | 81972  |        |        |
| B9HZQ8 | 3694   | D7KRQ1 | 81972  |        |        |
| B9IKL7 | 3694   | D7MIL9 | 81972  |        |        |
| B9Q185 | 5811   | O04973 | 28526  |        |        |

|        |        |        |        |
|--------|--------|--------|--------|
| B9QHR5 | 432359 | O04974 | 28526  |
| B9R6T8 | 3988   | O59736 | 4896   |
| B9R6T9 | 3988   | O94225 | 500485 |
| B9R6U0 | 3988   | P06208 | 4932   |
| B9RS41 | 3988   | P48570 | 4932   |
| B9S7U2 | 3988   | Q01FR2 | 70448  |
| B9SBB9 | 3988   | Q0CZH8 | 341663 |
| B9SX80 | 3988   | Q0CZN6 | 341663 |
| B9TIE0 | 3988   | Q0IUQ0 | 39947  |
| B9WB98 | 573826 | Q0UH08 | 13684  |
| B9WEE3 | 573826 | Q0V1B4 | 13684  |
| C0HAX7 | 8030   | Q12122 | 4932   |
| C0HF14 | 4577   | Q12166 | 4932   |
| C0LAM2 | 5341   | Q12726 | 4952   |
| C0NIH3 | 447093 | Q1JRZ0 | 81972  |
| C0NQG3 | 447093 | Q1JRZ1 | 81972  |
| C0P6R1 | 4577   | Q1JRZ2 | 81972  |
| C0P886 | 4577   | Q1JRZ3 | 115915 |
| C0PA18 | 4577   | Q1JRZ4 | 115915 |
| C0PTG0 | 3332   | Q1JRZ5 | 115915 |
| C0S9L5 | 482561 | Q1JRZ6 | 97979  |
| C0SFX8 | 482561 | Q1JRZ7 | 97979  |
| C1EDP6 | 296587 | Q1JRZ8 | 97979  |
| C1GC48 | 502780 | Q1JRZ9 | 59691  |
| C1GL38 | 502780 | Q1JS00 | 59691  |
| C1H0V7 | 502779 | Q1JS01 | 59691  |
| C1H5W2 | 502779 | Q2H478 | 38033  |
| C1MRQ3 | 564608 | Q2QXY9 | 39947  |
| C1MXY2 | 564608 | Q2RAP8 | 39947  |
| C3Z1L6 | 7739   | Q2U786 | 5062   |
| C4JP84 | 336963 | Q2UJL3 | 5062   |
| C4JT41 | 336963 | Q2UQI7 | 5062   |
| C4JUC0 | 336963 | Q30DX9 | 69183  |
| C4LSR8 | 5759   | Q39891 | 3847   |
| C4R7A4 | 644223 | Q4P6V7 | 5270   |
| C4XWX3 | 306902 | Q4P6Z8 | 5270   |
| C4YIA7 | 5476   | Q4WPU2 | 5085   |
| C5DFQ6 | 559295 | Q4WRV1 | 5085   |
| C5E1Q1 | 559307 | Q59TC4 | 5476   |
| C5FF64 | 554155 | Q59VG1 | 5476   |
| C5FWI3 | 554155 | Q59YF1 | 5476   |
| C5G0G2 | 554155 | Q5AB86 | 5476   |
| C5G9D5 | 559297 | Q5BBU0 | 162425 |
| C5GC46 | 559297 | Q5BF40 | 162425 |
| C5H9M5 | 51351  | Q5FAL5 | 3712   |
| C5H9M6 | 51351  | Q5KCL7 | 5207   |

|        |        |        |       |
|--------|--------|--------|-------|
| C5JN83 | 559298 | Q5KIZ5 | 5207  |
| C5JPW9 | 559298 | Q60D83 | 3712  |
| C5KPI8 | 423536 | Q60D84 | 3712  |
| C5LAN6 | 423536 | Q6B1Y9 | 4932  |
| C5LE91 | 423536 | Q6BM39 | 4959  |
| C5LSR3 | 423536 | Q6BRX1 | 4959  |
| C5M6U4 | 294747 | Q6BW96 | 4959  |
| C5MJG1 | 294747 | Q6BY18 | 4959  |
| C5NZB0 | 222929 | Q6CFF6 | 4952  |
| C5P8J6 | 222929 | Q6CIW1 | 28985 |
| C5XJI9 | 4558   | Q6CL60 | 28985 |
| C5YDX1 | 4558   | Q6CM17 | 28985 |
| C5YVA1 | 4558   | Q6CQU3 | 28985 |
| C6H7T8 | 544712 | Q6FNT3 | 5478  |
| C6HS95 | 544712 | Q6FP59 | 5478  |
| C6M0D6 | 598745 | Q6FSZ1 | 5478  |
| C6T8V8 | 3847   | Q6FT78 | 5478  |
| C6TLT9 | 3847   | Q71QG1 | 3712  |
| C7GN93 | 574961 | Q755P2 | 33169 |
| C7GPU1 | 574961 | Q75A20 | 33169 |
| C7YVH8 | 660122 | Q75AD2 | 33169 |
| C7Z035 | 660122 | Q7RVT2 | 5141  |
| C7Z586 | 660122 | Q7SFM2 | 5141  |
| C7Z616 | 660122 | Q8VX04 | 3702  |
| C8V3E5 | 227321 | Q9C550 | 3702  |
| C8V3Y1 | 227321 | Q9FG67 | 3702  |
| C8V3Y3 | 227321 | Q9FN52 | 3702  |
| C8V969 | 227321 | Q9LPR4 | 3702  |
| C8VTP8 | 227321 | Q9Y823 | 4896  |
| C8ZA09 | 643680 |        |       |
| C8ZBU8 | 643680 |        |       |
| C9STB5 | 526221 |        |       |
| C9ZJG3 | 679716 |        |       |
| C9ZJG4 | 679716 |        |       |
| D0NRA1 | 403677 |        |       |
| D1Z3T0 | 5147   |        |       |
| D2VAR7 | 5762   |        |       |
| D3BSA4 | 670386 |        |       |
| D3DLF7 | 559292 |        |       |
| D4B2E4 | 663331 |        |       |
| D4B2S3 | 663331 |        |       |
| D4DG90 | 663202 |        |       |
| D5GAR6 | 39416  |        |       |
| D5GAR7 | 39416  |        |       |
| D5GD45 | 39416  |        |       |
| D5GN05 | 39416  |        |       |



|        |        |
|--------|--------|
| D6VWW6 | 559292 |
| D6WAG1 | 7070   |
| D7Kfv4 | 81972  |
| D7Kfv6 | 81972  |
| D7Kfv8 | 81972  |
| D7KKL8 | 81972  |
| D7LA26 | 81972  |
| D7LSM8 | 81972  |
| D7Mnw6 | 81972  |
| D7MUM0 | 81972  |
| O14370 | 4896   |
| O15382 | 9606   |
| O35854 | 10116  |
| O35855 | 10090  |
| O88374 | 10090  |
| P24288 | 10090  |
| P38891 | 4932   |
| P47176 | 4932   |
| P54687 | 9606   |
| P54688 | 6239   |
| P54690 | 10116  |
| Q013H3 | 70448  |
| Q01AA4 | 70448  |
| Q01H95 | 4530   |
| Q0CHM6 | 341663 |
| Q0CN11 | 341663 |
| Q0CPA6 | 341663 |
| Q0DJP6 | 39947  |
| Q0E243 | 39947  |
| Q0P4T8 | 8364   |
| Q0UGM1 | 13684  |
| Q0UN77 | 13684  |
| Q0UT06 | 13684  |
| Q0UX59 | 13684  |
| Q0V7U6 | 3702   |
| Q0WQT2 | 3702   |
| Q0WUX7 | 3702   |
| Q0WW34 | 3702   |
| Q0WW83 | 3702   |
| Q10PK7 | 39947  |
| Q10PK8 | 39947  |
| Q10PL0 | 39947  |
| Q170J5 | 7159   |
| Q29IR8 | 46245  |
| Q2GSR0 | 38033  |
| Q2HEX6 | 38033  |

|        |        |
|--------|--------|
| Q2U042 | 5062   |
| Q2U1F9 | 5062   |
| Q2UG50 | 5062   |
| Q2UIB4 | 5062   |
| Q2UR77 | 5062   |
| Q2V4P2 | 3702   |
| Q3TJN1 | 10090  |
| Q3TKJ1 | 10090  |
| Q3ULU3 | 10090  |
| Q4FYB5 | 347515 |
| Q4P2X7 | 5270   |
| Q4PAT0 | 5270   |
| Q4PIE8 | 5270   |
| Q4WKQ2 | 5085   |
| Q4WNL4 | 5085   |
| Q4X1C8 | 5085   |
| Q54N47 | 44689  |
| Q55HM3 | 5207   |
| Q586R0 | 5691   |
| Q586R1 | 5691   |
| Q59YS9 | 5476   |
| Q5AHJ9 | 5476   |
| Q5AHX4 | 5476   |
| Q5AV02 | 162425 |
| Q5AV04 | 162425 |
| Q5B0H3 | 162425 |
| Q5B557 | 162425 |
| Q5BGE5 | 162425 |
| Q5DQ95 | 4081   |
| Q5E9U7 | 9913   |
| Q5EA40 | 9913   |
| Q5K761 | 5207   |
| Q5NAM3 | 39947  |
| Q5REP0 | 9601   |
| Q5RHB8 | 7955   |
| Q5W706 | 39947  |
| Q640F5 | 8355   |
| Q68DQ7 | 9606   |
| Q6AT43 | 39947  |
| Q6BSQ6 | 4959   |
| Q6CAN4 | 4952   |
| Q6CX88 | 28985  |
| Q6DG83 | 7955   |
| Q6DIN6 | 8364   |
| Q6FK92 | 5478   |
| Q6FTS6 | 5478   |

|        |       |
|--------|-------|
| Q6K7U8 | 39947 |
| Q6P784 | 10116 |
| Q6PC10 | 7955  |
| Q70KX9 | 4513  |
| Q75BE8 | 33169 |
| Q7QEI9 | 7165  |
| Q7S699 | 5141  |
| Q7SFT9 | 5141  |
| Q7XPR5 | 39947 |
| Q86QZ8 | 5741  |
| Q8CAX1 | 10090 |
| Q8CBC8 | 10090 |
| Q8GRH8 | 39947 |
| Q8H7T7 | 39947 |
| Q8L493 | 3702  |
| Q94CF8 | 4072  |
| Q94LV4 | 39947 |
| Q99JD5 | 10116 |
| Q9CXX6 | 10090 |
| Q9FYA6 | 3702  |
| Q9GKM4 | 9940  |
| Q9HEB7 | 5141  |
| Q9LE06 | 3702  |
| Q9LPM8 | 3702  |
| Q9LPM9 | 3702  |
| Q9M401 | 3702  |
| Q9M439 | 3702  |
| Q9SNY8 | 4113  |
| Q9SNY9 | 4113  |
| Q9VYD5 | 7227  |
| Q9XXD8 | 6239  |

| <b>3-isopropylmalate dehydratase</b> |             | <b>3-isopropylmalate dehydratase/(R)-2-methylmalate dehydratase large subunit</b> |             | <b>3-isopropylmalate dehydratase/(R)-2-methylmalate dehydratase small subunit</b> |             |
|--------------------------------------|-------------|-----------------------------------------------------------------------------------|-------------|-----------------------------------------------------------------------------------|-------------|
| <b>UniProt</b>                       | <b>TXID</b> | <b>UniProt</b>                                                                    | <b>TXID</b> | <b>UniProt</b>                                                                    | <b>TXID</b> |
| P07264                               | 4932        | Q94AR8                                                                            | 3702        | Q9ZW85                                                                            | 3702        |
| D6VUC8                               | 559292      | D7MV68                                                                            | 81972       | D7LJX7                                                                            | 81972       |
| B3LIM4                               | 285006      | B9SQS5                                                                            | 3988        | B9SXE3                                                                            | 3988        |
| A6ZUY4                               | 307796      | B9HSU8                                                                            | 3694        | B5LAV2                                                                            | 4072        |
| C8Z8N4                               | 643680      | B9HKV5                                                                            | 3694        | A9PJA7                                                                            | 3695        |
| C7GK64                               | 574961      | Q6Z702                                                                            | 39947       | A5B9M3                                                                            | 29760       |
| Q6FXV1                               | 5478        | B8AGY8                                                                            | 39946       | A9NMS1                                                                            | 3332        |
| A7TKW5                               | 436907      | C5XT62                                                                            | 4558        | C0PQ56                                                                            | 3332        |
| C5DHW7                               | 559295      | C4JBG7                                                                            | 4577        | B6SZA5                                                                            | 4577        |
| Q6CXX1                               | 28985       | C4IZQ5                                                                            | 4577        | B6UGK8                                                                            | 4577        |

|         |        |        |        |         |        |
|---------|--------|--------|--------|---------|--------|
| C4R0G5  | 644223 | B6TYJ6 | 4577   | A8HYG8  | 3055   |
| C5E063  | 559307 | B6U6T6 | 4577   | D5LB14  | 3055   |
| B9WKN6  | 573826 | B4FG11 | 4577   | Q4PLC1  | 33097  |
| Q6BUD7  | 4959   | A9TGU1 | 145481 | C5XRZ8  | 4558   |
| Q74ZM9  | 33169  | B8LQY6 | 3332   | Q949D1  | 4530   |
| C4Y AQ8 | 306902 | B8LQ24 | 3332   | Q6URQ0  | 39947  |
| Q5AAJ1  | 5476   | A8JG03 | 3055   | Q6H6I1  | 39947  |
| C4YND7  | 5476   | Q6B920 | 285951 | A2X7X9  | 39946  |
| C5M4Q5  | 294747 | D7G5W8 | 2880   | A1C6H0  | 5057   |
| A5DCZ2  | 4929   | A1C6H0 | 5057   | A1DH42  | 331117 |
| A3GH13  | 4924   | A1DH42 | 331117 | A2QCE1  | 425011 |
| Q00464  | 5479   | A2QCE1 | 425011 | A3GH13  | 4924   |
| Q6CG29  | 4952   | A3GH13 | 4924   | A4RKB1  | 148305 |
| A5DRP1  | 36914  | A4RKB1 | 148305 | A4RQI6  | 436017 |
| B8M3Q6  | 441959 | A4RQI6 | 436017 | A5DCZ2  | 4929   |
| B6QPH5  | 441960 | A5DCZ2 | 4929   | A5DRP1  | 36914  |
| Q7RZ87  | 5141   | A5DRP1 | 36914  | A6RBU6  | 339724 |
| B2AZG8  | 5145   | A6RBU6 | 339724 | A6ZUY4  | 307796 |
| C5JE09  | 559298 | A6SLR4 | 332648 | A7TKW5  | 436907 |
| C5GPC4  | 559297 | A6ZUY4 | 307796 | A8NY17  | 240176 |
| P55251  | 4840   | A7EWS8 | 665079 | A8PWL7  | 425265 |
| D1ZFL4  | 5147   | A7TKW5 | 436907 | B0CYV1  | 486041 |
| Q5B0P4  | 162425 | A8NY17 | 240176 | B0XSF6  | 451804 |
| C8UZW6  | 227321 | A8PWL7 | 425265 | B1X4T5  | 39717  |
| Q0U3J2  | 13684  | A9PBQ8 | 3694   | B2AZG8  | 5145   |
| B6H6J7  | 500485 | B0CYV1 | 486041 | B2WMF3  | 426418 |
| C6H331  | 544712 | B0E3H5 | 486041 | B3LIM4  | 285006 |
| C0NNE2  | 447093 | B0XSF6 | 451804 | B6H6J7  | 500485 |
| Q2UEQ5  | 5062   | B1X4T4 | 39717  | B6K3Q2  | 402676 |
| B8NG70  | 332952 | B2AZG8 | 5145   | B6QPH5  | 441960 |
| C5PJM4  | 222929 | B2WMF3 | 426418 | B7FPZ8  | 556484 |
| C1G7L2  | 502780 | B3LIM4 | 285006 | B8CEE0  | 35128  |
| B6K3Q2  | 402676 | B6H6J7 | 500485 | B8M3Q6  | 441959 |
| C5FFF4  | 554155 | B6K3Q2 | 402676 | B8NG70  | 332952 |
| Q0CXY4  | 341663 | B6QPH5 | 441960 | B9WKN6  | 573826 |
| B2WMF3  | 426418 | B7FPZ8 | 556484 | C0NNE2  | 447093 |
| Q4X144  | 5085   | B8CEE0 | 35128  | C1FEI6  | 296587 |
| B0XSF6  | 451804 | B8M3Q6 | 441959 | C1G7L2  | 502780 |
| C9S7W0  | 526221 | B8NG70 | 332952 | C1GY13  | 502779 |
| O14289  | 4896   | B9WKN6 | 573826 | C1MKS1  | 564608 |
| C7Z4P2  | 660122 | C0NNE2 | 447093 | C4JG58  | 336963 |
| A1DH42  | 331117 | C1FEI6 | 296587 | C4R0G5  | 644223 |
| A2QCE1  | 425011 | C1G7L2 | 502780 | C4Y AQ8 | 306902 |
| D4AYR1  | 663331 | C1GY13 | 502779 | C4YND7  | 5476   |
| D4DJK6  | 663202 | C1MKS1 | 564608 | C5DHW7  | 559295 |
| D5GE77  | 39416  | C4JG58 | 336963 | C5E063  | 559307 |

|        |        |        |        |        |        |
|--------|--------|--------|--------|--------|--------|
| A1C6H0 | 5057   | C4R0G5 | 644223 | C5FFF4 | 554155 |
| A4RKB1 | 148305 | C4YAQ8 | 306902 | C5GPC4 | 559297 |
| C4JG58 | 336963 | C4YND7 | 5476   | C5JE09 | 559298 |
| P18250 | 4837   | C5DHW7 | 559295 | C5M4Q5 | 294747 |
| A8NY17 | 240176 | C5E063 | 559307 | C5PJM4 | 222929 |
| Q2H013 | 38033  | C5FFF4 | 554155 | C6H331 | 544712 |
| Q5KPM3 | 5207   | C5GPC4 | 559297 | C7GK64 | 574961 |
| P55811 | 4844   | C5JE09 | 559298 | C7Z4P2 | 660122 |
| C1GY13 | 502779 | C5M4Q5 | 294747 | C8UZW6 | 227321 |
| P49601 | 5270   | C5PJM4 | 222929 | C8Z8N4 | 643680 |
| B0CYV1 | 486041 | C6H331 | 544712 | C9S7W0 | 526221 |
| A8PWL7 | 425265 | C7GK64 | 574961 | D4AYR1 | 663331 |
| A4RQI6 | 436017 | C7Z4P2 | 660122 | D4DJK6 | 663202 |
| C1FEI6 | 296587 | C8UZW6 | 227321 | D5GE77 | 39416  |
| C1MKS1 | 564608 | C8Z8N4 | 643680 | D6VUC8 | 559292 |
| A6RBU6 | 339724 | C9S7W0 | 526221 | D7LW92 | 81972  |
| B8CEE0 | 35128  | D4AYR1 | 663331 | O14289 | 4896   |
| B7FPZ8 | 556484 | D4DJK6 | 663202 | P07264 | 4932   |
| P17279 | 4841   | D5GE77 | 39416  | P17279 | 4841   |
| Q01CM0 | 70448  | D6VUC8 | 559292 | P18250 | 4837   |
| A6SLR4 | 332648 | O14289 | 4896   | P49601 | 5270   |
| A6SLR5 | 332648 | P07264 | 4932   | P55251 | 4840   |
| A7EWS8 | 665079 | P17279 | 4841   | P55811 | 4844   |
| A7EWS9 | 665079 | P18250 | 4837   | Q00464 | 5479   |
| B0DTJ7 | 486041 | P49601 | 5270   | Q0CXY4 | 341663 |
| B0E3H5 | 486041 | P55251 | 4840   | Q0U3J2 | 13684  |
| Q2GMU0 | 38033  | P55811 | 4844   | Q2GMU0 | 38033  |
| A8JG03 | 3055   | Q00464 | 5479   | Q2H013 | 38033  |
| A9TGU1 | 145481 | Q01CM0 | 70448  | Q2UEQ5 | 5062   |
| B4FG11 | 4577   | Q0CXY4 | 341663 | Q4X144 | 5085   |
| B6TYJ6 | 4577   | Q0U3J2 | 13684  | Q5AAJ1 | 5476   |
| B9HKV5 | 3694   | Q2GMU0 | 38033  | Q5B0P4 | 162425 |
| B9HSU8 | 3694   | Q2H013 | 38033  | Q5KPM3 | 5207   |
| B9SQS5 | 3988   | Q2UEQ5 | 5062   | Q6B919 | 285951 |
| C5XT62 | 4558   | Q4X144 | 5085   | Q6BUD7 | 4959   |
| Q6Z702 | 39947  | Q5AAJ1 | 5476   | Q6CG29 | 4952   |
| Q94AR8 | 3702   | Q5B0P4 | 162425 | Q6CXX1 | 28985  |
| A9PBQ8 | 3694   | Q5KPM3 | 5207   | Q6FXV1 | 5478   |
| B1X4T4 | 39717  | Q6BUD7 | 4959   | Q74ZM9 | 33169  |
| B6U6T6 | 4577   | Q6CG29 | 4952   | Q7RZ87 | 5141   |
| B8AGY8 | 39946  | Q6CXX1 | 28985  | Q9LYT7 | 3702   |
| B8LQ24 | 3332   | Q6FXV1 | 5478   |        |        |
| B8LQY6 | 3332   | Q74ZM9 | 33169  |        |        |
| C4IZQ5 | 4577   | Q7RZ87 | 5141   |        |        |
| C4JBG7 | 4577   |        |        |        |        |
| D7MV68 | 81972  |        |        |        |        |

|        |        |
|--------|--------|
| Q6B920 | 285951 |
| A5B9M3 | 29760  |
| A8HYG8 | 3055   |
| B6SZA5 | 4577   |
| B9SXE3 | 3988   |
| C5XRZ8 | 4558   |
| Q6H6I1 | 39947  |
| Q9ZW85 | 3702   |
| A2X7X9 | 39946  |
| A9NMS1 | 3332   |
| A9PJA7 | 3695   |
| B1X4T5 | 39717  |
| B5LAV2 | 4072   |
| B6UGK8 | 4577   |
| C0PQ56 | 3332   |
| D5LB14 | 3055   |
| D7LJX7 | 81972  |
| D7LW92 | 81972  |
| Q4PLC1 | 33097  |
| Q6B919 | 285951 |
| Q6URQ0 | 39947  |
| Q949D1 | 4530   |
| Q9LYT7 | 3702   |

| <b>homocitrate synthase</b> |             | <b>homoaconitate hydratase</b> |             | <b>homoisocitrate dehydrogenase</b> |             |
|-----------------------------|-------------|--------------------------------|-------------|-------------------------------------|-------------|
| <b>UniProt</b>              | <b>TXID</b> | <b>UniProt</b>                 | <b>TXID</b> | <b>UniProt</b>                      | <b>TXID</b> |
| Q12122                      | 4932        | P49367                         | 4932        | P40495                              | 4932        |
| D6VRL8                      | 559292      | D6VSL5                         | 559292      | D6VVJ3                              | 559292      |
| C8Z6H2                      | 643680      | C7GVB9                         | 574961      | C8ZAF6                              | 643680      |
| B3LH22                      | 285006      | B3LG54                         | 285006      | C7GKM1                              | 574961      |
| A6ZXJ7                      | 307796      | C8Z5E5                         | 643680      | B5VKL3                              | 545124      |
| Q6CL60                      | 28985       | A6ZYL7                         | 307796      | B3LTU1                              | 285006      |
| Q6FNT3                      | 5478        | C5DI88                         | 559295      | Q6FTG9                              | 5478        |
| C5E265                      | 559295      | Q6CT61                         | 28985       | C5DPB3                              | 559307      |
| A7TF22                      | 436907      | Q6FM51                         | 5478        | C5DMN7                              | 559295      |
| C5DTL1                      | 559307      | A7THY8                         | 436907      | Q6CP13                              | 28985       |
| Q75A20                      | 33169       | C5DQB1                         | 559307      | A7TLZ7                              | 436907      |
| A5DWR8                      | 36914       | A3LS85                         | 4924        | Q75AY4                              | 33169       |
| A5DUL2                      | 36914       | C4R8Y9                         | 644223      | A6ZVI3                              | 307796      |
| B9W7P6                      | 573826      | A5DDR9                         | 4929        | Q6BTP8                              | 4959        |
| B9WBB7                      | 573826      | Q5A644                         | 5476        | C5M4F5                              | 294747      |
| C4XZ37                      | 306902      | C4YH28                         | 5476        | Q5A9D9                              | 5476        |
| C4YAG2                      | 306902      | C5MCG0                         | 294747      | C4YNM9                              | 5476        |
| A5DDX9                      | 4929        | B9WGA9                         | 573826      | B9WKX4                              | 573826      |
| C5M6W3                      | 294747      | Q2HZ33                         | 5480        | A5DS53                              | 36914       |
| C5MF43                      | 294747      | Q6BM98                         | 4959        | A3M0H4                              | 4924        |

|        |        |        |        |        |        |
|--------|--------|--------|--------|--------|--------|
| Q6BM39 | 4959   | Q6C791 | 4952   | C4R2N2 | 644223 |
| Q6BRX1 | 4959   | C4XXK3 | 306902 | D5GNF9 | 39416  |
| Q59VG1 | 5476   | A5E7S0 | 36914  | Q0CRJ3 | 341663 |
| Q59TC4 | 5476   | Q75DX9 | 33169  | A1DME0 | 331117 |
| C4QWR7 | 644223 | Q9UT74 | 4896   | D1Z7V4 | 5147   |
| C4QYE7 | 644223 | D5GP05 | 39416  | C4JF94 | 336963 |
| A3LUA5 | 4924   | B2B627 | 5145   | Q6C9K0 | 4952   |
| B6K7H6 | 402676 | C8V0K3 | 227321 | A2R529 | 425011 |
| D5GJS6 | 39416  | B6JYB3 | 402676 | Q7SH15 | 5141   |
| Q9Y823 | 4896   | Q870W1 | 5141   | C0S5V1 | 482561 |
| Q5BBU0 | 162425 | Q92412 | 162425 | C1G2X0 | 502780 |
| C8VL66 | 227321 | C5P2A9 | 222929 | B6HCD5 | 500485 |
| A2QJ88 | 425011 | A4QU78 | 148305 | B0Y7C8 | 451804 |
| Q4WPU2 | 5085   | D4D9Z3 | 663202 | C5FFW5 | 554155 |
| B0Y6N3 | 451804 | D4AIQ8 | 663331 | C5PJ88 | 222929 |
| A1CWS1 | 331117 | Q2U9G3 | 5062   | Q4WN70 | 5085   |
| Q0CZH8 | 341663 | B6H7G0 | 500485 | B8MWA5 | 332952 |
| C6H2L0 | 544712 | B1P2N4 | 5076   | B6QLL4 | 441960 |
| C0NMX2 | 447093 | C0SGP6 | 482561 | C1H6J6 | 502779 |
| A1CHY9 | 5057   | Q58FL6 | 425011 | C0NXP5 | 447093 |
| C5PCV6 | 222929 | B8ND30 | 332952 | Q2UPP6 | 5062   |
| Q2UJL3 | 5062   | C1GXN8 | 502779 | B8MGT9 | 441959 |
| Q2U786 | 5062   | C1GGZ6 | 502780 | B2WQ48 | 426418 |
| C4JRR1 | 336963 | Q2GN26 | 38033  | C5K3H3 | 559298 |
| B8LWR9 | 441959 | C5FRR7 | 554155 | C5GWA1 | 559297 |
| C5GFR2 | 559297 | Q4HVQ9 | 5518   | O14104 | 4896   |
| C5JII3 | 559298 | B2W2S7 | 426418 | C6H8L2 | 544712 |
| B8N0W8 | 332952 | A6SLA2 | 332648 | B2AB72 | 5145   |
| B8NK98 | 332952 | Q0V4D3 | 13684  | A6RDS7 | 339724 |
| O94225 | 500485 | A7E6V1 | 665079 | Q6DTN1 | 162425 |
| B2AQI3 | 5145   | C6HGU3 | 544712 | C8VF81 | 227321 |
| B6QPX9 | 441960 | C0NZQ0 | 447093 | A1CT29 | 5057   |
| A6RAW0 | 339724 | A6R963 | 339724 | Q0V4L7 | 13684  |
| C0S541 | 482561 | B6QV43 | 441960 | A4RK98 | 148305 |
| C1H8B2 | 502779 | A1CAH1 | 5057   | B6JVT5 | 402676 |
| Q0UH08 | 13684  | B8MSQ2 | 441959 | A6RLD8 | 332648 |
| B2WGW9 | 426418 | Q4WUL6 | 5085   | A7EB51 | 665079 |
| D4D4U1 | 663202 | B0Y440 | 451804 | Q2HEK1 | 38033  |
| D1ZBU6 | 5147   | A1DEU5 | 331117 | D4APM6 | 663331 |
| D4B0E9 | 663331 | D1ZLH5 | 5147   | D4D3K3 | 663202 |
| C5FUR8 | 554155 | Q0CKV7 | 341663 | Q4P4U0 | 5270   |
| D2JWV4 | 5208   | D6RM87 | 240176 | Q55U60 | 5207   |
| Q7RVT2 | 5141   | B0D9W3 | 486041 | Q5KI84 | 5207   |
| B4VKF4 | 118168 | C9S550 | 526221 | A8NWK9 | 240176 |
| D1CIS7 | 525904 | Q5K9V9 | 5207   | B0CUW7 | 486041 |
| Q2IHS7 | 290397 | A8Q727 | 425265 | A8Q6L7 | 425265 |

|        |        |        |        |        |        |
|--------|--------|--------|--------|--------|--------|
| B8JCA9 | 455488 | Q4P521 | 5270   | C9SEZ4 | 526221 |
| B4UFB7 | 447217 | C7Z6F8 | 660122 | D2VFR4 | 5762   |
| Q9RUZ2 | 1299   | C7ZFG6 | 660122 | D7BEI7 | 526227 |
| B8G9T8 | 326427 | D2VQI0 | 5762   | Q8RQU4 | 274    |
| B9LI57 | 480224 | Q1IMD4 | 204669 | Q72IW9 | 262724 |
| A9WD10 | 324602 | C5GXJ3 | 559297 | Q5SIJ1 | 300852 |
| Q1IYY1 | 319795 | C5K3L0 | 559298 | B7A5P1 | 498848 |
| A9B804 | 316274 | A9UZ48 | 81824  | B5U8Z6 | 271    |
| Q4J989 | 2285   | C4JP58 | 336963 | Q8TX93 | 2320   |
| Q4JA78 | 2285   | D1B6F6 | 525903 | Q8TW22 | 2320   |
| A0B9D1 | 349307 | D1B740 | 525903 | D7CVN0 | 649638 |
| A0B8Q2 | 349307 | D1B6F4 | 525903 | D3PNU1 | 504728 |
| A0B5D7 | 349307 | B8E2Q9 | 515635 | D5E914 | 547558 |
| A4YHL8 | 399549 | B8E2X0 | 515635 | D5VRX3 | 573063 |
| A4YEE6 | 399549 | B5IEF0 | 439481 | D5VQV4 | 573063 |
| C7P6A0 | 573064 | B5IER5 | 439481 | C7P8K1 | 573064 |
| C7P602 | 573064 | B5I9M1 | 439481 | C7P893 | 573064 |
| C7P7J6 | 573064 | C0WAT0 | 563191 | D3S5L2 | 644281 |
| A6UVA9 | 419665 | C0WBH9 | 563191 | D3S6U8 | 644281 |
| A6UUT7 | 419665 | B5YA67 | 309799 | A5US63 | 357808 |
| A6UVQ0 | 419665 | B5YEF5 | 309799 | Q8PZ52 | 2209   |
| C4KGW9 | 426118 | C9RD99 | 429009 | Q58130 | 2190   |
| C4KKB2 | 426118 | C9RAX0 | 429009 | Q58991 | 2190   |
| C3NHU6 | 419942 | Q6L0K5 | 263820 | Q2NE99 | 339860 |
| C3NMC8 | 419942 | Q6KZ03 | 263820 | Q2NGI1 | 339860 |
| C3NDV7 | 439386 | D4KGT7 | 657316 | C9RFZ3 | 579137 |
| C3N935 | 439386 | D4KG72 | 657316 | C9RGA8 | 579137 |
| C3N5A3 | 427318 | C8X2U8 | 485915 | A9B807 | 316274 |
| C3N144 | 427318 | D3SL46 | 638303 | A0B7H0 | 349307 |
| C3MYM1 | 427317 | D3SQ81 | 638303 | O29627 | 2234   |
| C3MU56 | 427317 | D4UP39 | 246199 | Q6LYV7 | 39152  |
| C3MPM7 | 429572 | D4UJU7 | 246199 | Q6LZT4 | 39152  |
| D2PJS1 | 425944 | D6SS75 | 555779 | O26286 | 187420 |
| D2PEP7 | 425944 | Q1Q122 | 174633 | O27441 | 187420 |
| A4G035 | 402880 | B4U7U5 | 380749 | A6VFH2 | 426368 |
| A4FXB6 | 402880 | B4U832 | 380749 | A6VJJ0 | 426368 |
| A4FXG1 | 402880 | C2KW91 | 585501 | B9LI60 | 480224 |
| Q6M0W5 | 39152  | A1HLS2 | 401526 | A9WD13 | 324602 |
| Q6LYC8 | 39152  | D1Z2Z1 | 304371 | A9AB63 | 444158 |
| Q6LYH3 | 39152  | D1Z011 | 304371 | A9A765 | 444158 |
| D3E1C0 | 634498 | D1YYL1 | 304371 | D3E2X3 | 634498 |
| D3E403 | 634498 | A8UWH6 | 392423 | D3DYN5 | 634498 |
| D3E0J1 | 634498 | A8UUM9 | 392423 | A4FXR5 | 402880 |
| B5YA66 | 309799 | C0EDN6 | 537013 | A4FYT7 | 402880 |
| B5YEF4 | 309799 | C0EH67 | 537013 | D7E7V1 | 644295 |
| A9A8E1 | 444158 | D4MII6 | 717961 | B8G9T5 | 326427 |



|        |        |        |        |        |        |
|--------|--------|--------|--------|--------|--------|
| A9AAN5 | 444158 | B0MLF2 | 428128 | C7NTB6 | 519442 |
| A9AAT0 | 444158 | C0R088 | 565034 | A6UX38 | 419665 |
| B8E2Q8 | 515635 | D3LVK7 | 699218 | A6UWX0 | 419665 |
| B8E2W9 | 515635 | D3RWK9 | 589924 | A6UN83 | 406327 |
| D4TDM3 | 533240 | D3S2A2 | 589924 | A6USW3 | 406327 |
| D2RHN2 | 572546 | D5U4B3 | 526224 | D1Z013 | 304371 |
| D2RHQ3 | 572546 | D4JF94 | 717960 | A7NPM5 | 383372 |
| A6TMV5 | 293826 | D4JEG8 | 717960 | Q46FW0 | 269797 |
| A6TTX4 | 293826 | D4JQP8 | 657319 | B9AH59 | 483214 |
| A6TTR8 | 293826 | D4XYJ8 | 552811 | B9AFU0 | 483214 |
| A6VIE3 | 426368 | D4XXV9 | 552811 | Q8TJN2 | 2214   |
| A6VG10 | 426368 | A8ABG2 | 453591 | Q1IYD1 | 319795 |
| A6VJV4 | 426368 | A8AB09 | 453591 | D2RGM3 | 572546 |
| Q97ZE0 | 2287   | D1C1T4 | 479434 | D2ZMH5 | 521002 |
| Q97W36 | 2287   | D1C5D4 | 479434 | D2ZNT2 | 521002 |
| D0KTU9 | 555311 | A0B7V1 | 349307 | Q2FKU1 | 323259 |
| D0KMX5 | 555311 | A0B7A3 | 349307 | A5UK50 | 420247 |
| D3T718 | 580331 | D1U9X6 | 643562 | A5UMS5 | 420247 |
| D3T543 | 580331 | D1U8I0 | 643562 | Q0W1Q6 | 351160 |
| A5CZ95 | 370438 | C9LTJ0 | 546271 | D7DTJ0 | 456320 |
| A5D4W0 | 370438 | Q9WYC7 | 2336   | D2RXB1 | 543526 |
| Q8RCF9 | 119072 | Q9WZ24 | 2336   | A8AB60 | 453591 |
| Q8RDK3 | 119072 | Q9UZ07 | 29292  | B3TCK6 | 455613 |
| B8CW93 | 373903 | Q9V1J0 | 29292  | C1D1S7 | 546414 |
| B8CX21 | 373903 | D3L1B9 | 592015 | B3T5X6 | 455578 |
| D7ASQ9 | 583358 | D3L117 | 592015 | B8GDU3 | 521011 |
| D7AQD3 | 583358 | D3L5P1 | 592015 | Q9RTT2 | 1299   |
| D7DQU6 | 456320 | D3L0J8 | 592015 | Q4JB37 | 2285   |
| D7DTR3 | 456320 | B7RDD0 | 443254 | A8MDZ3 | 397948 |
| D7DS06 | 456320 | B7RB96 | 443254 | A9A4I7 | 436308 |
| D5XD93 | 635013 | A5IKB8 | 390874 | A4YCW3 | 399549 |
| D5XCE4 | 635013 | A5IJM1 | 390874 | Q028N1 | 234267 |
| D5XAF0 | 635013 | D2C7S7 | 590168 | P50455 | 111955 |
| O27525 | 187420 | D2C651 | 590168 | A8TZR8 | 331869 |
| O26819 | 187420 | B1L9K1 | 126740 | A8TLN2 | 331869 |
| O27667 | 187420 | B1L8U1 | 126740 | A7I5V9 | 456442 |
| C7IRR0 | 589861 | D2RHT2 | 572546 | A2SQ05 | 410358 |
| C7IRE6 | 589861 | D2RHD9 | 572546 | Q9UXB2 | 2287   |
| C7HMQ2 | 588857 | D3E0J0 | 634498 | D0KTC8 | 555311 |
| C7HNL3 | 588857 | D3DYN7 | 634498 | D2PC68 | 425944 |
| C5UBV2 | 509193 | O27668 | 187420 | C4KHF3 | 426118 |
| C5UAT5 | 509193 | O27439 | 187420 | C3NHB2 | 419942 |
| C5RRT7 | 573062 | B9KC23 | 309803 | C3NEE0 | 439386 |
| C5RSG9 | 573062 | B9KB94 | 309803 | C3MVH5 | 427317 |
| B0KCA2 | 340099 | B1I3K5 | 477974 | C3MQ57 | 429572 |
| B0KAH4 | 340099 | B1I1Y2 | 477974 | Q3IRQ6 | 348780 |

|        |        |        |        |        |        |
|--------|--------|--------|--------|--------|--------|
| B0K353 | 399726 | D4RX38 | 511680 | B1L5I7 | 374847 |
| B0K0Y1 | 399726 | Q0QLE2 | 1528   | C3N5S4 | 427318 |
| Q64A78 | 286720 | A4J6Z5 | 349161 | Q8U299 | 2261   |
| C9RD98 | 429009 | A4J182 | 349161 | A3CT70 | 368407 |
| C9RAW9 | 429009 | B2V844 | 436114 | A5DKS4 | 4929   |
| Q8THA5 | 2214   | C0QS35 | 123214 | A5DKS5 | 4929   |
| Q8TJJ1 | 2214   | A9BIA6 | 403833 |        |        |
| Q8TKQ6 | 2214   | A9BGP4 | 403833 |        |        |
| P58968 | 2209   | Q30WD3 | 207559 |        |        |
| P58966 | 2209   | B2KBD7 | 445932 |        |        |
| P58967 | 2209   | O28084 | 2234   |        |        |
| Q74EM5 | 35554  | O28316 | 2234   |        |        |
| Q74BX2 | 35554  | Q8TQZ3 | 2214   |        |        |
| D7AH81 | 663917 | Q8TLF1 | 2214   |        |        |
| D7AKA3 | 663917 | A5CZ94 | 370438 |        |        |
| Q46DX8 | 269797 | A5D4W1 | 370438 |        |        |
| Q46FZ1 | 269797 | Q2NE97 | 339860 |        |        |
| Q46AH2 | 269797 | Q2NFC0 | 339860 |        |        |
| Q2RH53 | 264732 | C1DUH4 | 204536 |        |        |
| Q2RG97 | 264732 | C7LW15 | 525897 |        |        |
| A0AK92 | 386043 | D4LZ50 | 657313 |        |        |
| A0AWZ9 | 331272 | D4LZ48 | 657313 |        |        |
| A0JX36 | 290399 | C6PDK3 | 580327 |        |        |
| A0K933 | 331272 | C4V4K3 | 638302 |        |        |
| A0KAN5 | 331272 | D4S5Q9 | 585503 |        |        |
| A0KGM9 | 380703 | D6TDR7 | 485913 |        |        |
| A0KLS9 | 380703 | D6TMS0 | 485913 |        |        |
| A0L1R0 | 94122  | C4FI11 | 432331 |        |        |
| A0L629 | 156889 | D5E9U8 | 547558 |        |        |
| A0L692 | 156889 | D5E882 | 547558 |        |        |
| A0LBW3 | 156889 | D2BHR4 | 311424 |        |        |
| A0LF05 | 335543 | D2BGU6 | 311424 |        |        |
| A0LSS5 | 351607 | Q46AJ7 | 269797 |        |        |
| A0LT07 | 351607 | Q46B45 | 269797 |        |        |
| A0M365 | 411154 | C4FRW1 | 546273 |        |        |
| A0PVE6 | 362242 | D6KKJ9 | 457416 |        |        |
| A0Q408 | 401614 | C8WM14 | 479437 |        |        |
| A0Q9T9 | 243243 | A4XJ48 | 351627 |        |        |
| A0R5Q2 | 246196 | A4XHI4 | 351627 |        |        |
| A0RBL2 | 412694 | Q3Z894 | 243164 |        |        |
| A0RQK7 | 360106 | Q3Z9A7 | 243164 |        |        |
| A0ZZP3 | 367928 | C3XG48 | 613026 |        |        |
| A1A7C2 | 405955 | B9MLV4 | 521460 |        |        |
| A1AL90 | 338966 | B9MNX1 | 521460 |        |        |
| A1AWA1 | 413404 | D1BQH1 | 479436 |        |        |
| A1B9A2 | 318586 | D4L5N8 | 657321 |        |        |

|        |        |        |        |
|--------|--------|--------|--------|
| A1B9D4 | 318586 | D4L7L8 | 657321 |
| A1BES0 | 290317 | D2ZNG5 | 521002 |
| A1BES3 | 290317 | D2ZNT0 | 521002 |
| A1BJ89 | 290317 | B9AG62 | 483214 |
| A1CNV7 | 5057   | B9AFU3 | 483214 |
| A1D1R7 | 331117 | C6LJ75 | 478749 |
| A1JJH7 | 393305 | Q7M9Z9 | 844    |
| A1KAC3 | 62928  | C5EVL2 | 457421 |
| A1KBD3 | 62928  | C5EE69 | 457421 |
| A1KQ42 | 410289 | C5EK99 | 457421 |
| A1KTV6 | 272831 | C5EVU7 | 457421 |
| A1R6V4 | 290340 | D1YNY3 | 686660 |
| A1REY0 | 351745 | Q8PUG1 | 2209   |
| A1RU85 | 384616 | Q8PZT3 | 2209   |
| A1RVH5 | 384616 | A7VNU8 | 428125 |
| A1RVII | 384616 | A7VWI4 | 428125 |
| A1S2E0 | 326297 | C0CLF7 | 476272 |
| A1SI02 | 196162 | A5UL50 | 420247 |
| A1SM31 | 196162 | A5UMS7 | 420247 |
| A1SRG8 | 357804 | C4G1B4 | 592010 |
| A1SZX5 | 357804 | Q8TVF2 | 2320   |
| A1TGI1 | 350058 | Q8TW29 | 2320   |
| A1TI48 | 397945 | B8J4F9 | 525146 |
| A1TRT4 | 397945 | D2RND4 | 591001 |
| A1U1E7 | 351348 | D2RMM0 | 591001 |
| A1U3I3 | 351348 | D6KRX7 | 450749 |
| A1UMW8 | 189918 | D5EGY8 | 572547 |
| A1UZQ2 | 320388 | D5ECG6 | 572547 |
| A1V2K5 | 320388 | D6E7M6 | 657308 |
| A1VAE8 | 391774 | C6PQI2 | 536227 |
| A1VCV3 | 391774 | Q2RG98 | 264732 |
| A1VN06 | 365044 | Q2RHA7 | 264732 |
| A1W1X2 | 354242 | C0B4V9 | 470146 |
| A1W6T6 | 232721 | C0B4W1 | 470146 |
| A1W6T7 | 232721 | D2L8F5 | 644968 |
| A1WNY5 | 391735 | D2L2I7 | 644968 |
| A1WUW0 | 349124 | Q18AJ2 | 272563 |
| A2BRP4 | 146891 | Q18A28 | 272563 |
| A2BX52 | 167542 | A4FW44 | 402880 |
| A2C3L7 | 167555 | A4FZC1 | 402880 |
| A2C859 | 59922  | A6UQC3 | 406327 |
| A2QAX8 | 425011 | A6URZ3 | 406327 |
| A2S698 | 412022 | A6UUR4 | 419665 |
| A2SHL8 | 420662 | A6VH65 | 426368 |
| A2SQ02 | 410358 | A6VJ16 | 426368 |
| A2SR21 | 410358 | A9A6R8 | 444158 |

|        |        |        |        |
|--------|--------|--------|--------|
| A3CMI9 | 388919 | A9A9I4 | 444158 |
| A3CT66 | 368407 | C7P5Q8 | 573064 |
| A3CW48 | 368407 | C7P908 | 573064 |
| A3CZK5 | 325240 | C9RG34 | 579137 |
| A3DF94 | 203119 | C9RHV4 | 579137 |
| A3DIE2 | 203119 | D3S8I8 | 644281 |
| A3GFB4 | 4924   | Q58409 | 2190   |
| A3M1Y3 | 400667 | Q58667 | 2190   |
| A3MQ98 | 320389 | Q6LX72 | 39152  |
| A3MVJ7 | 410359 | Q6M090 | 39152  |
| A3MWJ6 | 410359 | A2SR25 | 410358 |
| A3MWK4 | 410359 | A3CWX5 | 368407 |
| A3MZB1 | 416269 | A4XJ49 | 351627 |
| A3N5I3 | 320373 | A4YF02 | 399549 |
| A3N7K7 | 320373 | A5FS16 | 216389 |
| A3NR79 | 357348 | A5IKB7 | 390874 |
| A3NT94 | 357348 | A6DBJ4 | 391592 |
| A3PDH0 | 167546 | A6Q2Y1 | 387092 |
| A3PJH5 | 349101 | A6UTS7 | 419665 |
| A3Q7A2 | 164757 | A7IA28 | 456442 |
| A3QIP0 | 323850 | A8A985 | 453591 |
| A4CLQ7 | 313596 | A8UYD4 | 392423 |
| A4F6E9 | 405948 | B0A9M6 | 445973 |
| A4FLG7 | 405948 | B0MLF0 | 428128 |
| A4FMP9 | 405948 | B1H0A5 | 471821 |
| A4G3X8 | 204773 | B1L5I8 | 374847 |
| A4G4I1 | 204773 | B1L9K0 | 126740 |
| A4IRH8 | 420246 | B1YDA5 | 444157 |
| A4J025 | 418136 | B2KBD8 | 445932 |
| A4J181 | 349161 | B4U7M0 | 380749 |
| A4J185 | 349161 | B5IBC3 | 439481 |
| A4JGE0 | 269482 | B5ICW9 | 439481 |
| A4JI05 | 269482 | B5YA68 | 309799 |
| A4QAP0 | 340322 | B5YEF6 | 309799 |
| A4QR67 | 148305 | B5YHE5 | 289376 |
| A4RRV6 | 436017 | B7RDC9 | 443254 |
| A4SCL9 | 290318 | B8E2R0 | 515635 |
| A4SFC7 | 290318 | B8E2X1 | 515635 |
| A4SFD0 | 290318 | B8I4G1 | 394503 |
| A4SLG1 | 382245 | B9KC21 | 309803 |
| A4SR62 | 382245 | B9L5K2 | 598659 |
| A4SXR0 | 312153 | B9MLV3 | 521460 |
| A4T617 | 350054 | C3MKR6 | 429572 |
| A4TQA2 | 386656 | C3MUB4 | 427317 |
| A4VNV6 | 379731 | C3N1A2 | 427318 |
| A4VPH4 | 379731 | C3N992 | 439386 |

|        |        |        |        |
|--------|--------|--------|--------|
| A4VXS6 | 391295 | C3NMW1 | 419942 |
| A4W423 | 391296 | C3XFH7 | 613026 |
| A4W6H9 | 399742 | C4KKU5 | 426118 |
| A4WDP9 | 399742 | C5CJ09 | 521045 |
| A4WMI8 | 340102 | C7II83 | 588581 |
| A4WMJ2 | 340102 | C9RDA0 | 429009 |
| A4WMM6 | 340102 | D0KN35 | 555311 |
| A4WSX7 | 349102 | D2BGU7 | 311424 |
| A4WU99 | 349102 | D2C7S8 | 590168 |
| A4X1F9 | 369723 | D2PF89 | 425944 |
| A4X4B3 | 369723 | D2RD58 | 572546 |
| A4XIL8 | 351627 | D2RE08 | 572546 |
| A4XIL9 | 351627 | D3DH48 | 608538 |
| A4XQZ1 | 399739 | D3LIC0 | 592015 |
| A4XY24 | 399739 | D3MYU5 | 547146 |
| A4Y2M0 | 319224 | D3S0L5 | 589924 |
| A4YII3 | 399549 | D3S625 | 644281 |
| A4YX00 | 114615 | D3SHV0 | 633145 |
| A4YZ76 | 114615 | D3SMX6 | 638303 |
| A5CRB9 | 443906 | D3TBK5 | 439481 |
| A5CWZ3 | 412965 | D4XYJ9 | 552811 |
| A5D4W4 | 370438 | D5VRI3 | 573063 |
| A5DK19 | 4929   | D7DR01 | 456320 |
| A5DVS2 | 36914  | O67399 | 63363  |
| A5DYI7 | 36914  | Q0W1Q4 | 351160 |
| A5EHF0 | 288000 | Q0W5L6 | 351160 |
| A5EP79 | 288000 | Q12TV2 | 259564 |
| A5FR43 | 216389 | Q12UW0 | 259564 |
| A5FR51 | 216389 | Q2FSZ6 | 323259 |
| A5FVX6 | 349163 | Q3Z9A6 | 243164 |
| A5G3X8 | 351605 | Q3ZZJ9 | 255470 |
| A5G7V0 | 351605 | Q46FW4 | 269797 |
| A5GM47 | 32051  | Q703X7 | 2271   |
| A5GRZ0 | 316278 | Q97EE1 | 1488   |
| A5IJM2 | 390874 | Q97VY3 | 2287   |
| A5IJM3 | 390874 | Q9WYC8 | 2336   |
| A5IRF4 | 359786 |        |        |
| A5IUK3 | 359786 |        |        |
| A5MZ76 | 431943 |        |        |
| A5N495 | 431943 |        |        |
| A5U936 | 419947 |        |        |
| A5UD85 | 374930 |        |        |
| A5UMM3 | 420247 |        |        |
| A5UUP7 | 357808 |        |        |
| A5UUP9 | 357808 |        |        |
| A5V3R3 | 392499 |        |        |

|        |        |
|--------|--------|
| A5VPL4 | 444178 |
| A5VRU2 | 444178 |
| A5VZB6 | 351746 |
| A5WE78 | 349106 |
| A5WTS8 | 336982 |
| A6L1V7 | 435590 |
| A6LDN1 | 435591 |
| A6LPX3 | 290402 |
| A6LVG2 | 290402 |
| A6Q4V5 | 387092 |
| A6QBP1 | 387093 |
| A6QIQ3 | 426430 |
| A6S6B4 | 332648 |
| A6SX91 | 375286 |
| A6SZY8 | 375286 |
| A6T4L9 | 272620 |
| A6TCV1 | 272620 |
| A6U083 | 359787 |
| A6U3E2 | 359787 |
| A6U7E4 | 366394 |
| A6UBT9 | 366394 |
| A6UP71 | 406327 |
| A6V0X2 | 381754 |
| A6V355 | 381754 |
| A6VQK8 | 339671 |
| A6VSA9 | 400668 |
| A6VWW7 | 400668 |
| A6WDF2 | 266940 |
| A6WIB5 | 402882 |
| A6WZB1 | 439375 |
| A6X268 | 439375 |
| A7F9C4 | 665079 |
| A7FM84 | 349747 |
| A7GMU1 | 315749 |
| A7GWY5 | 360105 |
| A7H667 | 360109 |
| A7HB60 | 404589 |
| A7HB11 | 404589 |
| A7HP03 | 402881 |
| A7HS43 | 402881 |
| A7I0N8 | 360107 |
| A7I5V5 | 456442 |
| A7I9C0 | 456442 |
| A7IEY5 | 78245  |
| A7IP18 | 78245  |
| A7K4A1 | 150340 |

|        |        |
|--------|--------|
| A7MIC5 | 290339 |
| A7MWC1 | 338187 |
| A7NJH4 | 383372 |
| A7NJH6 | 383372 |
| A7TNA0 | 436907 |
| A7X4N1 | 418127 |
| A7Z7B8 | 326423 |
| A7ZES2 | 360104 |
| A7ZHG6 | 331111 |
| A7ZW25 | 331112 |
| A8AA75 | 453591 |
| A8AB61 | 453591 |
| A8ABX3 | 453591 |
| A8ALM5 | 290338 |
| A8ES07 | 367737 |
| A8EV45 | 367737 |
| A8F3U8 | 416591 |
| A8FAK7 | 315750 |
| A8FFW5 | 315750 |
| A8FP35 | 407148 |
| A8FQ83 | 425104 |
| A8G5D5 | 93060  |
| A8G9R1 | 399741 |
| A8GCY8 | 399741 |
| A8H9A1 | 398579 |
| A8I4Y2 | 438753 |
| A8IEW7 | 438753 |
| A8L551 | 298653 |
| A8L558 | 298653 |
| A8LLR0 | 398580 |
| A8LPL9 | 398580 |
| A8LYI4 | 391037 |
| A8M5G7 | 391037 |
| A8MB07 | 397948 |
| A8MCN2 | 397948 |
| A8MDZ2 | 397948 |
| A8NEF9 | 240176 |
| A8PWG4 | 425265 |
| A8Z4W0 | 451516 |
| A8Z5S1 | 444179 |
| A8ZTR1 | 96561  |
| A8ZTR2 | 96561  |
| A9A1L0 | 436308 |
| A9A4I8 | 436308 |
| A9AEW4 | 395019 |
| A9AJN4 | 395019 |

|        |        |
|--------|--------|
| A9AZ36 | 316274 |
| A9AZM4 | 316274 |
| A9BB43 | 93059  |
| A9BGP1 | 403833 |
| A9BME6 | 398578 |
| A9BME7 | 398578 |
| A9BNM7 | 398578 |
| A9FJU5 | 448385 |
| A9FMN1 | 448385 |
| A9GW82 | 448385 |
| A9GW85 | 448385 |
| A9HMA2 | 272568 |
| A9HW07 | 340100 |
| A9KIN4 | 357809 |
| A9KRN2 | 357809 |
| A9KY13 | 399599 |
| A9LYZ1 | 374833 |
| A9M6X7 | 483179 |
| A9MA52 | 483179 |
| A9MZK0 | 272994 |
| A9R142 | 349746 |
| A9S4K9 | 145481 |
| A9T9B8 | 145481 |
| A9VLG7 | 315730 |
| A9WC27 | 324602 |
| A9WML8 | 288705 |
| B0BTP8 | 434271 |
| B0C3D3 | 329726 |
| B0CEB7 | 329726 |
| B0CI01 | 470137 |
| B0CL04 | 470137 |
| B0JFN2 | 449447 |
| B0JGK2 | 449447 |
| B0K6M2 | 399726 |
| B0K7V2 | 340099 |
| B0KRD9 | 76869  |
| B0RCQ8 | 31964  |
| B0RP28 | 509169 |
| B0S9H2 | 355278 |
| B0SF06 | 355278 |
| B0SN40 | 456481 |
| B0SS61 | 456481 |
| B0T0G9 | 366602 |
| B0TCR1 | 498761 |
| B0TCR5 | 498761 |
| B0TQM0 | 458817 |



|         |        |
|---------|--------|
| B0TW82  | 484022 |
| B0U2S5  | 405440 |
| B0UKW3  | 426117 |
| B0USF6  | 228400 |
| B0V4R9  | 509173 |
| B0VL50  | 509170 |
| B1GYX1  | 471821 |
| B1H0A7  | 471821 |
| B1HR98  | 444177 |
| B1II Y1 | 477974 |
| B1II Y4 | 477974 |
| B1IC50  | 487214 |
| B1IRA4  | 481805 |
| B1JDI2  | 390235 |
| B1JK98  | 502800 |
| B1JVQ1  | 406425 |
| B1JYQ9  | 406425 |
| B1K7V8  | 406425 |
| B1K8B2  | 406425 |
| B1KKZ4  | 392500 |
| B1L3C4  | 374847 |
| B1L8U2  | 126740 |
| B1L8U3  | 126740 |
| B1LG11  | 439855 |
| B1M239  | 426355 |
| B1MF23  | 561007 |
| B1MFN6  | 561007 |
| B1MVR2  | 349519 |
| B1VIR4  | 504474 |
| B1VY56  | 455632 |
| B1VZ53  | 455632 |
| B1WQQ4  | 43989  |
| B1X098  | 43989  |
| B1XHY4  | 32049  |
| B1XLQ9  | 32049  |
| B1XUJ3  | 452638 |
| B1XYA8  | 395495 |
| B1XYA9  | 395495 |
| B1YBE0  | 444157 |
| B1YDA0  | 444157 |
| B1YDA6  | 444157 |
| B1YN62  | 398577 |
| B1YTR7  | 398577 |
| B1ZDN3  | 441620 |
| B1ZZJ0  | 452637 |
| B2A0B6  | 452637 |

|        |        |
|--------|--------|
| B2AHM5 | 164546 |
| B2AUM7 | 5145   |
| B2FT78 | 522373 |
| B2GHT7 | 378753 |
| B2HKD3 | 216594 |
| B2I3B7 | 405416 |
| B2I596 | 405441 |
| B2IED9 | 395963 |
| B2IFN7 | 395963 |
| B2IU89 | 63737  |
| B2J7J8 | 63737  |
| B2JCD3 | 391038 |
| B2JDN6 | 391038 |
| B2K4C9 | 502801 |
| B2S4T8 | 430066 |
| B2S726 | 430066 |
| B2SNG9 | 360094 |
| B2SXZ9 | 398527 |
| B2T2D7 | 398527 |
| B2TJA4 | 508765 |
| B2U281 | 344609 |
| B2U7S0 | 402626 |
| B2UJY9 | 402626 |
| B2ULC1 | 349741 |
| B2V4X2 | 508767 |
| B2V7D9 | 436114 |
| B2V9M9 | 436114 |
| B2VDA7 | 338565 |
| B3DUA5 | 205913 |
| B3DX88 | 481448 |
| B3DYI6 | 481448 |
| B3E3D5 | 398767 |
| B3EBJ2 | 398767 |
| B3EH10 | 290315 |
| B3EHN6 | 290315 |
| B3EKI8 | 331678 |
| B3EKV3 | 331678 |
| B3EKV6 | 331678 |
| B3H0Q7 | 537457 |
| B3PEP5 | 498211 |
| B3PUR8 | 491916 |
| B3PV47 | 491916 |
| B3QB91 | 395960 |
| B3QCS7 | 395960 |
| B3QCX5 | 395960 |
| B3QM95 | 517417 |

|        |        |
|--------|--------|
| B3QRE0 | 517417 |
| B3QSN5 | 517418 |
| B3QSN8 | 517418 |
| B3R3V8 | 164546 |
| B4E5N2 | 216591 |
| B4EAQ3 | 216591 |
| B4EHL9 | 216591 |
| B4F194 | 529507 |
| B4RFC9 | 450851 |
| B4RLF0 | 521006 |
| B4RVU7 | 314275 |
| B4S3P6 | 290512 |
| B4S6M8 | 290512 |
| B4S6N1 | 290512 |
| B4SBC0 | 324925 |
| B4SDK9 | 324925 |
| B4SDL2 | 324925 |
| B4SI67 | 391008 |
| B4SU36 | 423368 |
| B4TJ72 | 454169 |
| B4TWW1 | 439843 |
| B4U9Q7 | 380749 |
| B4U9S8 | 380749 |
| B4UAM9 | 447217 |
| B4UL75 | 447217 |
| B4UML4 | 447217 |
| B5BLB5 | 554290 |
| B5E4Z4 | 512566 |
| B5EHU7 | 404380 |
| B5EI20 | 404380 |
| B5EJU9 | 380394 |
| B5EMT9 | 380394 |
| B5F7U9 | 454166 |
| B5FGH4 | 388396 |
| B5FI58 | 439851 |
| B5R2K9 | 550537 |
| B5RGE4 | 550538 |
| B5XVC6 | 507522 |
| B5Y1W2 | 507522 |
| B5YEF8 | 309799 |
| B5YJS7 | 289376 |
| B5YK61 | 289376 |
| B5YZB0 | 444450 |
| B5ZWA7 | 395492 |
| B5ZY91 | 395492 |
| B6ELK0 | 316275 |

|        |        |
|--------|--------|
| B6HIA0 | 500485 |
| B6HZ24 | 409438 |
| B6ISG5 | 414684 |
| B6ITR2 | 414684 |
| B6JB87 | 504832 |
| B6JHT5 | 504832 |
| B6SH97 | 4577   |
| B6SWM0 | 4577   |
| B6YRN0 | 511995 |
| B7FUP6 | 556484 |
| B7G5N8 | 556484 |
| B7GH19 | 491915 |
| B7GT76 | 391904 |
| B7H097 | 557600 |
| B7HHF5 | 405532 |
| B7HKC4 | 405534 |
| B7I4X5 | 480119 |
| B7IN93 | 405531 |
| B7J7R3 | 243159 |
| B7JC84 | 243159 |
| B7JFY5 | 405535 |
| B7JUG5 | 41431  |
| B7JYP4 | 41431  |
| B7KF92 | 65393  |
| B7KJX8 | 65393  |
| B7KQH6 | 440085 |
| B7LFU5 | 585055 |
| B7LWE2 | 585054 |
| B7M119 | 585034 |
| B7MAJ9 | 585035 |
| B7MNT2 | 585397 |
| B7N7U9 | 585056 |
| B7NHI2 | 585057 |
| B7UIC4 | 574521 |
| B7UWV9 | 557722 |
| B7UXH6 | 557722 |
| B7VIF2 | 575788 |
| B8A2E9 | 4577   |
| B8BRI7 | 296543 |
| B8C732 | 35128  |
| B8CM39 | 225849 |
| B8CX25 | 373903 |
| B8DBU4 | 552536 |
| B8DM91 | 883    |
| B8DPE5 | 883    |
| B8DVK8 | 442563 |

|        |        |
|--------|--------|
| B8E2X3 | 515635 |
| B8E4K4 | 407976 |
| B8EMY4 | 395965 |
| B8EP66 | 395965 |
| B8F7W2 | 557723 |
| B8FHI2 | 439235 |
| B8FHI3 | 439235 |
| B8FYI5 | 272564 |
| B8G7X2 | 326427 |
| B8GDQ8 | 521011 |
| B8GDT9 | 521011 |
| B8GUB3 | 396588 |
| B8H607 | 565050 |
| B8H8Q9 | 452863 |
| B8HST9 | 395961 |
| B8I1T6 | 394503 |
| B8I1T7 | 394503 |
| B8IHS8 | 460265 |
| B8J4F8 | 525146 |
| B8J737 | 455488 |
| B8J824 | 455488 |
| B8JGT3 | 455488 |
| B8MZH6 | 332952 |
| B8ZT16 | 561304 |
| B9DMJ6 | 396513 |
| B9DXW3 | 583346 |
| B9E371 | 583346 |
| B9IUZ0 | 361100 |
| B9J7D4 | 311403 |
| B9JCA0 | 311403 |
| B9JHD2 | 311403 |
| B9JUR0 | 311402 |
| B9JZ80 | 311402 |
| B9KB95 | 309803 |
| B9KB96 | 309803 |
| B9KPM0 | 557760 |
| B9KRV9 | 557760 |
| B9KY22 | 309801 |
| B9L0Y0 | 309801 |
| B9L7G8 | 598659 |
| B9LGM8 | 480224 |
| B9LUZ7 | 416348 |
| B9M2T5 | 316067 |
| B9M5A8 | 316067 |
| B9MA32 | 535289 |
| B9MA33 | 535289 |

|        |        |
|--------|--------|
| B9MNV2 | 521460 |
| B9MNV4 | 521460 |
| B9SX30 | 3988   |
| B9W6H7 | 573826 |
| B9WCP0 | 573826 |
| C0Q5H1 | 476213 |
| C0QDD0 | 177437 |
| C0QDD1 | 177437 |
| C0QM22 | 177437 |
| C0QPV4 | 123214 |
| C0QQB9 | 123214 |
| C0R089 | 565034 |
| C0REK0 | 546272 |
| C0RI20 | 546272 |
| C0Z635 | 358681 |
| C0Z7H0 | 358681 |
| C0Z9C8 | 358681 |
| C0ZI85 | 358681 |
| C0ZN67 | 234621 |
| C0ZRN0 | 234621 |
| C1AIG4 | 561275 |
| C1AUX2 | 632772 |
| C1B9P5 | 632772 |
| C1C7N7 | 488221 |
| C1CWU2 | 546414 |
| C1DA11 | 557598 |
| C1DE40 | 322710 |
| C1DFH2 | 322710 |
| C1DUG8 | 204536 |
| C1DWG8 | 204536 |
| C1EMA9 | 572264 |
| C1F702 | 240015 |
| C3K1K7 | 216595 |
| C3L9Q7 | 568206 |
| C3LR32 | 579112 |
| C3M992 | 394    |
| C3MFP8 | 394    |
| C3MJ64 | 429572 |
| C3MYV6 | 427317 |
| C3N004 | 427318 |
| C3N887 | 439386 |
| C3NF24 | 419942 |
| C3NVB2 | 593588 |
| C3P4Z6 | 592021 |
| C3PJR0 | 548476 |
| C4JY82 | 336963 |

|        |        |
|--------|--------|
| C4KAF1 | 85643  |
| C4KJ45 | 426118 |
| C4KPJ3 | 536230 |
| C4KU56 | 536230 |
| C4LAV7 | 595494 |
| C4LGL7 | 645127 |
| C4R0L2 | 644223 |
| C4X378 | 484021 |
| C4XCF1 | 484021 |
| C4XPA8 | 573370 |
| C4XQB4 | 573370 |
| C4XX33 | 306902 |
| C4Y5K7 | 306902 |
| C4Z0W1 | 515620 |
| C4ZDA3 | 515619 |
| C4ZPZ7 | 595496 |
| C5AAL9 | 626418 |
| C5ADL5 | 626418 |
| C5AHP0 | 626418 |
| C5AK37 | 626418 |
| C5AUL0 | 272630 |
| C5B7R4 | 634503 |
| C5BQI9 | 377629 |
| C5BQS2 | 377629 |
| C5C2J4 | 471853 |
| C5C4P2 | 471853 |
| C5CCC3 | 465515 |
| C5CYP1 | 543728 |
| C5CYP2 | 543728 |
| C5D5M0 | 471223 |
| C5DGX9 | 559295 |
| C5DRM6 | 559307 |
| C5DT42 | 559307 |
| C5M530 | 294747 |
| C5MDZ9 | 294747 |
| C5VVA9 | 218494 |
| C5Y4G6 | 4558   |
| C5YQI8 | 4558   |
| C6A662 | 580050 |
| C6AGS0 | 555970 |
| C6APR9 | 634176 |
| C6AT55 | 395491 |
| C6ATJ8 | 395491 |
| C6BJQ8 | 428406 |
| C6BLN0 | 428406 |
| C6BSG8 | 526222 |

|        |        |
|--------|--------|
| C6BV83 | 526222 |
| C6C9J2 | 579405 |
| C6CD53 | 579405 |
| C6CJV8 | 561229 |
| C6CWB7 | 324057 |
| C6CYA6 | 324057 |
| C6DEV8 | 561230 |
| C6DJY7 | 561230 |
| C6DNF0 | 478434 |
| C6E2T7 | 443144 |
| C6E526 | 443144 |
| C6GSE1 | 568813 |
| C6GXA3 | 568814 |
| C6S6Y5 | 662598 |
| C6SPV9 | 511691 |
| C6UM38 | 413997 |
| C6UVR1 | 544404 |
| C6VV52 | 471854 |
| C6WF52 | 446462 |
| C6WG56 | 446462 |
| C6WYB6 | 583345 |
| C6X713 | 582744 |
| C6X7K6 | 582744 |
| C6XN10 | 582402 |
| C6XSQ5 | 485917 |
| C7BQ10 | 553480 |
| C7C7H0 | 661410 |
| C7JAV8 | 634452 |
| C7LAY8 | 568815 |
| C7LDF9 | 568815 |
| C7LK15 | 595499 |
| C7LRJ6 | 525897 |
| C7LW16 | 525897 |
| C7M0E4 | 525909 |
| C7M0F3 | 525909 |
| C7MD85 | 446465 |
| C7MDN4 | 446465 |
| C7MNU3 | 469378 |
| C7MQR7 | 471857 |
| C7MXE9 | 471857 |
| C7N750 | 471855 |
| C7NBT9 | 523794 |
| C7NTA3 | 519442 |
| C7NZI9 | 485914 |
| C7PC99 | 485918 |
| C7Q5A2 | 479433 |



|        |        |
|--------|--------|
| C7QE20 | 479433 |
| C7QJN7 | 479433 |
| C7QKV4 | 395962 |
| C7QUU4 | 395962 |
| C7QYV9 | 471856 |
| C7R518 | 471856 |
| C7RAA1 | 523791 |
| C7RNH2 | 522306 |
| C7RP33 | 522306 |
| C7RRT0 | 522306 |
| C8TGK5 | 573235 |
| C8U1E6 | 585395 |
| C8UGU5 | 585396 |
| C8VYG5 | 485916 |
| C8W660 | 485916 |
| C8W663 | 485916 |
| C8WB59 | 622759 |
| C8WI89 | 479437 |
| C8WKR4 | 479437 |
| C8WRC1 | 521098 |
| C8WUC8 | 521098 |
| C8X2U9 | 485915 |
| C8X3J3 | 485915 |
| C8X8C8 | 479431 |
| C8XEL4 | 479431 |
| C9RAX2 | 429009 |
| C9RGX2 | 579137 |
| C9RKZ6 | 59374  |
| C9RN88 | 59374  |
| C9RU47 | 544556 |
| C9XME2 | 645462 |
| C9XVN1 | 413502 |
| C9YJU2 | 645463 |
| C9Z581 | 680198 |
| C9ZAQ8 | 680198 |
| D0FPG3 | 79967  |
| D0J5D5 | 688245 |
| D0J5D6 | 688245 |
| D0J7V6 | 688245 |
| D0J9Z9 | 600809 |
| D0JAB2 | 331104 |
| D0K6U4 | 681288 |
| D0KMH9 | 561231 |
| D0L133 | 555778 |
| D0LDG8 | 526226 |
| D0LGL9 | 502025 |

|        |        |
|--------|--------|
| D0LNR8 | 502025 |
| D0MG82 | 518766 |
| D0MG85 | 518766 |
| D0ZC67 | 498217 |
| D1A9T8 | 471852 |
| D1ABQ4 | 471852 |
| D1AJT5 | 526218 |
| D1AJT6 | 526218 |
| D1B3V3 | 525898 |
| D1B739 | 525903 |
| D1BDG4 | 446469 |
| D1BEZ8 | 446469 |
| D1BQH0 | 479436 |
| D1BUW1 | 446471 |
| D1BVS8 | 446471 |
| D1C1T3 | 479434 |
| D1CDV6 | 525904 |
| D1CDV9 | 525904 |
| D1Z010 | 304371 |
| D1Z2F8 | 304371 |
| D2AVP7 | 479432 |
| D2AZP6 | 479432 |
| D2BHR1 | 311424 |
| D2BHR6 | 311424 |
| D2BQX0 | 684738 |
| D2BRQ8 | 590409 |
| D2BWM4 | 590409 |
| D2C649 | 590168 |
| D2C650 | 590168 |
| D2NT82 | 680646 |
| D2NVH1 | 653938 |
| D2P6U6 | 637381 |
| D2PE76 | 425944 |
| D2PW56 | 479435 |
| D2Q0U4 | 479435 |
| D2Q7U5 | 401473 |
| D2QSS8 | 504472 |
| D2QX79 | 530564 |
| D2R560 | 530564 |
| D2RKU9 | 591001 |
| D2RXB9 | 543526 |
| D2S666 | 526225 |
| D2SEJ5 | 526225 |
| D2TGD2 | 637910 |
| D2UCH0 | 380358 |
| D3DHH1 | 608538 |

|        |        |
|--------|--------|
| D3DJ10 | 608538 |
| D3EA49 | 481743 |
| D3EBC1 | 481743 |
| D3EER3 | 481743 |
| D3F0A4 | 469383 |
| D3F0B7 | 469383 |
| D3FWD7 | 398511 |
| D3H9B8 | 365659 |
| D3HCJ2 | 637909 |
| D3NWT9 | 137722 |
| D3NXD0 | 137722 |
| D3P8S8 | 639282 |
| D3PDH5 | 639282 |
| D3PT79 | 504728 |
| D3PT80 | 504728 |
| D3PZI9 | 446470 |
| D3Q5Q6 | 446470 |
| D3QIN4 | 698737 |
| D3QVG0 | 701177 |
| D3RBN0 | 640131 |
| D3RJH6 | 640131 |
| D3RN33 | 572477 |
| D3RT05 | 572477 |
| D3S1E8 | 589924 |
| D3S3U6 | 644281 |
| D3SAZ5 | 396595 |
| D3SIR4 | 633145 |
| D3SIR9 | 633145 |
| D3SLJ2 | 638303 |
| D3SLM7 | 638303 |
| D3SQK2 | 547559 |
| D3T3R9 | 580331 |
| D3UIF2 | 679897 |
| D3UPT7 | 683837 |
| D3V4N2 | 406818 |
| D3V8R4 | 406817 |
| D4GEB2 | 706191 |
| D4GJR3 | 706191 |
| D4GYF6 | 309800 |
| D4H3V8 | 522772 |
| D4H837 | 522772 |
| D4HDA0 | 553199 |
| D4I011 | 665029 |
| D4IFX8 | 716540 |
| D4Z111 | 452662 |
| D4ZDW0 | 637905 |

|        |        |
|--------|--------|
| D5AT02 | 272942 |
| D5AU62 | 272942 |
| D5B0U3 | 637386 |
| D5BLR2 | 655815 |
| D5BRM3 | 488538 |
| D5BT69 | 488538 |
| D5BWV8 | 472759 |
| D5C8G8 | 716541 |
| D5CH57 | 716541 |
| D5CNR5 | 580332 |
| D5CUG7 | 580332 |
| D5D8H8 | 641892 |
| D5DLN1 | 592022 |
| D5DTM4 | 545693 |
| D5E8E5 | 547558 |
| D5EBW6 | 547558 |
| D5ECG7 | 572547 |
| D5EJA6 | 583355 |
| D5EJL6 | 583355 |
| D5EYZ7 | 264731 |
| D5SN19 | 521674 |
| D5SYW5 | 521674 |
| D5T3U8 | 762051 |
| D5TUA6 | 714359 |
| D5U4B2 | 526224 |
| D5UG58 | 446466 |
| D5ULN2 | 446466 |
| D5UN64 | 521096 |
| D5V2E3 | 572480 |
| D5V4I8 | 572480 |
| D5VCR0 | 749219 |
| D5VFU9 | 509190 |
| D5W5W9 | 640511 |
| D5W9H9 | 640511 |
| D5WW56 | 562970 |
| D5X0W9 | 75379  |
| D5XAF4 | 635013 |
| D6W175 | 559292 |
| D6XXJ0 | 439292 |
| D6Y692 | 469371 |
| D6Y8J0 | 469371 |
| D6Z0M0 | 589865 |
| D6Z1T6 | 589865 |
| D6ZCA8 | 640132 |
| D6ZGP8 | 548479 |
| D6ZGQ2 | 548479 |

|        |        |
|--------|--------|
| D6ZS81 | 525381 |
| D6ZXJ9 | 759350 |
| D7A2B8 | 639283 |
| D7AQ76 | 583358 |
| D7AU69 | 446468 |
| D7AYI6 | 446468 |
| D7BHS1 | 526227 |
| D7BHS2 | 526227 |
| D7CJ19 | 643648 |
| D7CJ23 | 643648 |
| D7CXY7 | 649638 |
| D7CXY8 | 649638 |
| D7D291 | 691437 |
| D7DM18 | 666681 |
| D7DWL3 | 551115 |
| D7DY92 | 551115 |
| D7E0I5 | 551115 |
| D7E5V1 | 644295 |
| D7E808 | 644295 |
| D7GD07 | 754252 |
| D7GE89 | 754252 |
| O30020 | 2234   |
| O31046 | 1902   |
| O59390 | 53953  |
| O66682 | 63363  |
| O67862 | 63363  |
| O86511 | 1902   |
| P42455 | 1718   |
| P43861 | 727    |
| P48575 | 103690 |
| P48576 | 1148   |
| P58899 | 196620 |
| P63476 | 158878 |
| P63477 | 158879 |
| P74269 | 1148   |
| P94565 | 1423   |
| P96420 | 1773   |
| Q01UL9 | 234267 |
| Q02J53 | 208963 |
| Q02RU6 | 208963 |
| Q02YX5 | 272622 |
| Q03KB0 | 322159 |
| Q03UM0 | 203120 |
| Q04DA4 | 203123 |
| Q04QM8 | 355277 |
| Q04T27 | 355277 |

|        |        |
|--------|--------|
| Q051E9 | 355276 |
| Q054A1 | 355276 |
| Q05FR2 | 387662 |
| Q07PI3 | 316055 |
| Q07Q38 | 316055 |
| Q07WG9 | 318167 |
| Q0AB82 | 187272 |
| Q0AGN5 | 335283 |
| Q0AV20 | 335541 |
| Q0AV24 | 335541 |
| Q0BBP5 | 339670 |
| Q0BDB9 | 339670 |
| Q0BS32 | 391165 |
| Q0C523 | 228405 |
| Q0HZT4 | 60481  |
| Q0I2G1 | 205914 |
| Q0IBI3 | 64471  |
| Q0K537 | 381666 |
| Q0KCT8 | 381666 |
| Q0RDJ1 | 326424 |
| Q0RDJ9 | 326424 |
| Q0S690 | 101510 |
| Q0S8X0 | 101510 |
| Q0T8C4 | 373384 |
| Q0TLR5 | 362663 |
| Q0V1B4 | 13684  |
| Q0VLR3 | 393595 |
| Q0VRW2 | 393595 |
| Q0W1Q3 | 351160 |
| Q0W3Q1 | 351160 |
| Q0W6C5 | 351160 |
| Q10Y65 | 203124 |
| Q112U2 | 203124 |
| Q119Q8 | 203124 |
| Q11G93 | 266779 |
| Q11JQ9 | 266779 |
| Q11NN9 | 269798 |
| Q12B47 | 296591 |
| Q12B48 | 296591 |
| Q12SE7 | 318161 |
| Q12V56 | 259564 |
| Q12XM1 | 259564 |
| Q138Z2 | 316057 |
| Q139D5 | 316057 |
| Q13WM0 | 266265 |
| Q142I2 | 266265 |

|        |        |
|--------|--------|
| Q14JJ0 | 393115 |
| Q15QR4 | 342610 |
| Q15VT6 | 342610 |
| Q164A5 | 375451 |
| Q16AY3 | 375451 |
| Q18AI7 | 272563 |
| Q1ARE0 | 266117 |
| Q1ARE2 | 266117 |
| Q1B282 | 164756 |
| Q1BKJ9 | 331271 |
| Q1BTF6 | 331271 |
| Q1BV03 | 331271 |
| Q1C1Z6 | 360102 |
| Q1CMP5 | 377628 |
| Q1DCT2 | 246197 |
| Q1GEA2 | 292414 |
| Q1GHH9 | 292414 |
| Q1GUI1 | 117207 |
| Q1H3C1 | 265072 |
| Q1H400 | 265072 |
| Q1I5K2 | 384676 |
| Q1J0T3 | 319795 |
| Q1LAT0 | 266264 |
| Q1LPX2 | 266264 |
| Q1MDH6 | 216596 |
| Q1MJ27 | 216596 |
| Q1QBL0 | 335284 |
| Q1QJV3 | 323097 |
| Q1QN85 | 323097 |
| Q1QUH6 | 290398 |
| Q1QUJ6 | 290398 |
| Q1RGC3 | 364106 |
| Q212A9 | 316056 |
| Q216P3 | 316056 |
| Q21HP6 | 203122 |
| Q21IC1 | 203122 |
| Q21VZ1 | 338969 |
| Q24PE3 | 138119 |
| Q28L52 | 290400 |
| Q2A5S3 | 376619 |
| Q2A5S4 | 376619 |
| Q2FWK3 | 93061  |
| Q2FZS6 | 93061  |
| Q2G619 | 279238 |
| Q2IDZ9 | 290397 |
| Q2IJC1 | 290397 |

|        |        |
|--------|--------|
| Q2IUL5 | 290397 |
| Q2IUP3 | 316058 |
| Q2IUT4 | 316058 |
| Q2J6V5 | 106370 |
| Q2J6W2 | 106370 |
| Q2JLJ8 | 321332 |
| Q2JLX0 | 321332 |
| Q2JSL4 | 321327 |
| Q2JWS4 | 321327 |
| Q2K5Q2 | 347834 |
| Q2KAB4 | 347834 |
| Q2KTP9 | 360910 |
| Q2L077 | 360910 |
| Q2LU50 | 56780  |
| Q2LWJ3 | 56780  |
| Q2NAV6 | 314225 |
| Q2NFC1 | 339860 |
| Q2NHL7 | 339860 |
| Q2NVW3 | 343509 |
| Q2P761 | 342109 |
| Q2QXY9 | 39947  |
| Q2RGA1 | 264732 |
| Q2RT17 | 269796 |
| Q2RUD3 | 269796 |
| Q2RWJ6 | 269796 |
| Q2S0M2 | 309807 |
| Q2S0M7 | 309807 |
| Q2S9W6 | 349521 |
| Q2SBZ8 | 349521 |
| Q2SZP5 | 271848 |
| Q2T1D2 | 271848 |
| Q2UQI7 | 5062   |
| Q2W1F9 | 342108 |
| Q2W1K3 | 342108 |
| Q2W5E1 | 342108 |
| Q2YBW0 | 323848 |
| Q2YN18 | 359391 |
| Q2YRT1 | 359391 |
| Q2YUF2 | 273036 |
| Q30PB7 | 326298 |
| Q30WD4 | 207559 |
| Q30ZQ0 | 207559 |
| Q31AF9 | 74546  |
| Q31EF5 | 317025 |
| Q31II6 | 317025 |
| Q31NC9 | 1140   |



|        |        |
|--------|--------|
| Q326G1 | 300268 |
| Q32K20 | 300267 |
| Q390S3 | 269483 |
| Q39CT0 | 269483 |
| Q39ED5 | 269483 |
| Q39UG6 | 269799 |
| Q39W73 | 269799 |
| Q3A3A9 | 338963 |
| Q3A5U9 | 338963 |
| Q3AEQ1 | 246194 |
| Q3AEQ5 | 246194 |
| Q3AIA2 | 110662 |
| Q3APC7 | 340177 |
| Q3AQ00 | 340177 |
| Q3AYY2 | 316279 |
| Q3B596 | 319225 |
| Q3B599 | 319225 |
| Q3B6K3 | 319225 |
| Q3BPJ9 | 316273 |
| Q3IIS2 | 326442 |
| Q3IQK7 | 348780 |
| Q3IV11 | 272943 |
| Q3J2V6 | 272943 |
| Q3J3Z9 | 272943 |
| Q3J877 | 323261 |
| Q3JUB9 | 320372 |
| Q3JWA5 | 320372 |
| Q3K7C3 | 205922 |
| Q3M862 | 240292 |
| Q3MBA3 | 240292 |
| Q3SHE7 | 292415 |
| Q3SQ49 | 323098 |
| Q3ST98 | 323098 |
| Q3Z5T6 | 300269 |
| Q3Z892 | 243164 |
| Q3Z897 | 243164 |
| Q3ZXI3 | 255470 |
| Q3ZXI8 | 255470 |
| Q46K01 | 59920  |
| Q470Y1 | 264198 |
| Q473V1 | 264198 |
| Q47BI0 | 159087 |
| Q47IR3 | 159087 |
| Q47RM9 | 269800 |
| Q47SB2 | 269800 |
| Q47WG4 | 167879 |

|        |        |
|--------|--------|
| Q48LY5 | 264730 |
| Q493R0 | 291272 |
| Q49Z12 | 342451 |
| Q4FKW1 | 198252 |
| Q4FLI8 | 198252 |
| Q4FSC9 | 259536 |
| Q4J6H1 | 2285   |
| Q4JSM3 | 306537 |
| Q4K6V7 | 220664 |
| Q4K963 | 220664 |
| Q4L7U0 | 279808 |
| Q4P6V7 | 5270   |
| Q4QLS4 | 281310 |
| Q4UYG1 | 314565 |
| Q4WRV1 | 5085   |
| Q4ZX14 | 205918 |
| Q57BV2 | 235    |
| Q57E61 | 235    |
| Q57TE6 | 28901  |
| Q58595 | 2190   |
| Q5BF40 | 162425 |
| Q5E856 | 312309 |
| Q5F8D4 | 242231 |
| Q5FQ74 | 442    |
| Q5HEE4 | 93062  |
| Q5HMF9 | 176279 |
| Q5HS76 | 195099 |
| Q5JFV5 | 311400 |
| Q5KCL7 | 5207   |
| Q5KWJ3 | 1462   |
| Q5LAB0 | 272559 |
| Q5LRJ7 | 89184  |
| Q5LWC0 | 89184  |
| Q5LZF2 | 299768 |
| Q5M404 | 264199 |
| Q5N341 | 269084 |
| Q5N5T3 | 269084 |
| Q5NI38 | 119856 |
| Q5NP33 | 542    |
| Q5NXN2 | 76114  |
| Q5SJ04 | 300852 |
| Q5SJ06 | 300852 |
| Q5V523 | 2238   |
| Q5WEN3 | 66692  |
| Q5WQ01 | 372461 |
| Q5YVA5 | 37329  |

|        |        |
|--------|--------|
| Q5Z341 | 37329  |
| Q605K7 | 414    |
| Q62FA8 | 13373  |
| Q63DX8 | 288681 |
| Q63VP3 | 28450  |
| Q63XN2 | 28450  |
| Q64QP0 | 817    |
| Q65GI8 | 279010 |
| Q65V04 | 221988 |
| Q66EM1 | 633    |
| Q67KX4 | 2734   |
| Q67MX0 | 2734   |
| Q6A972 | 1747   |
| Q6AED3 | 59736  |
| Q6AJI3 | 84980  |
| Q6AQI4 | 84980  |
| Q6CFF6 | 4952   |
| Q6CQU3 | 28985  |
| Q6D0G8 | 29471  |
| Q6FEQ2 | 62977  |
| Q6FSZ1 | 5478   |
| Q6G7Q1 | 282459 |
| Q6GF16 | 282458 |
| Q6KZ01 | 263820 |
| Q6L0K4 | 263820 |
| Q6LV24 | 74109  |
| Q6N0U6 | 1076   |
| Q6N858 | 1076   |
| Q6N8A4 | 1076   |
| Q6NJX5 | 1717   |
| Q71Y35 | 265669 |
| Q726X5 | 882    |
| Q72AS7 | 882    |
| Q72JC9 | 262724 |
| Q72JD1 | 262724 |
| Q73BA0 | 222523 |
| Q744M9 | 1770   |
| Q74C76 | 35554  |
| Q755P2 | 33169  |
| Q75AD2 | 33169  |
| Q7M9W4 | 844    |
| Q7MP77 | 196600 |
| Q7N129 | 141679 |
| Q7NI93 | 33072  |
| Q7NNJ0 | 33072  |
| Q7P0H2 | 536    |

|        |        |
|--------|--------|
| Q7SFM2 | 5141   |
| Q7TUV5 | 74547  |
| Q7TVV6 | 1765   |
| Q7U892 | 84588  |
| Q7UI51 | 265606 |
| Q7UXI0 | 265606 |
| Q7V121 | 59919  |
| Q7VBG1 | 1219   |
| Q7VH30 | 32025  |
| Q7VQJ6 | 203907 |
| Q7W071 | 520    |
| Q7W0I9 | 520    |
| Q7W2R5 | 519    |
| Q7WCA0 | 519    |
| Q7WDR3 | 518    |
| Q7WQA4 | 518    |
| Q81G12 | 226900 |
| Q81T68 | 1392   |
| Q820M0 | 915    |
| Q82BV3 | 33903  |
| Q82JP4 | 33903  |
| Q83SP0 | 623    |
| Q87CL8 | 183190 |
| Q87SS7 | 670    |
| Q88P28 | 160488 |
| Q89A49 | 224915 |
| Q89GB0 | 375    |
| Q89NP6 | 375    |
| Q8A6L6 | 818    |
| Q8CNL3 | 176280 |
| Q8DEE1 | 672    |
| Q8DJ32 | 197221 |
| Q8DKK9 | 197221 |
| Q8DPJ2 | 171101 |
| Q8DTG2 | 1309   |
| Q8E9N2 | 70863  |
| Q8EN67 | 182710 |
| Q8F445 | 173    |
| Q8F8T4 | 173    |
| Q8FL75 | 217992 |
| Q8FU05 | 152794 |
| Q8FZC4 | 29461  |
| Q8G1N3 | 29461  |
| Q8G6Z2 | 216816 |
| Q8GA98 | 1140   |
| Q8KAP9 | 1097   |

|         |        |
|---------|--------|
| Q8KES0  | 1097   |
| Q8TW28  | 2320   |
| Q8TYB1  | 2320   |
| Q8U0C1  | 2261   |
| Q8U298  | 2261   |
| Q8U2A2  | 2261   |
| Q8UD63  | 176299 |
| Q8XSZ5  | 305    |
| Q8XXP1  | 305    |
| Q8Y5R9  | 1639   |
| Q8YG91  | 29459  |
| Q8YIJ3  | 29459  |
| Q8YRC6  | 103690 |
| Q8ZIG8  | 632    |
| Q8ZW35  | 13773  |
| Q8ZW39  | 13773  |
| Q8ZXD7  | 13773  |
| Q92A28  | 1642   |
| Q92R15  | 382    |
| Q96YG8  | 111955 |
| Q971S5  | 111955 |
| Q974X3  | 111955 |
| Q97A78  | 273116 |
| Q97ED9  | 1488   |
| Q97MC5  | 1488   |
| Q97QF7  | 1313   |
| Q980Z1  | 2287   |
| Q984X3  | 381    |
| Q98HN3  | 381    |
| Q9A823  | 155892 |
| Q9C550  | 3702   |
| Q9CB76  | 1769   |
| Q9CJN5  | 747    |
| Q9FG67  | 3702   |
| Q9FN52  | 3702   |
| Q9H XK5 | 287    |
| Q9I4C1  | 287    |
| Q9K8E8  | 86665  |
| Q9KP83  | 666    |
| Q9PCG3  | 2371   |
| Q9PLV9  | 197    |
| Q9RUA9  | 1299   |
| Q9UZ04  | 29292  |
| Q9UZ08  | 29292  |
| Q9V1J1  | 29292  |
| Q9WZ22  | 2336   |

|        |        |
|--------|--------|
| Q9WZ23 | 2336   |
| Q9X7L2 | 382    |
| A0B606 | 349307 |
| A0LKA4 | 335543 |
| A0NKT1 | 379360 |
| A0NMQ8 | 384765 |
| A0NVJ4 | 384765 |
| A0RV79 | 46770  |
| A0RWW4 | 46770  |
| A0Y448 | 156578 |
| A0YAU0 | 247633 |
| A0YCU0 | 247633 |
| A0YYJ6 | 313612 |
| A0Z321 | 247639 |
| A0ZGD0 | 313624 |
| A0ZJV5 | 313624 |
| A1ARF0 | 338966 |
| A1ER46 | 345076 |
| A1F8B2 | 412614 |
| A1HLS3 | 401526 |
| A2PBC5 | 412966 |
| A2PVK0 | 412883 |
| A2TTX6 | 313590 |
| A2TXI5 | 313598 |
| A2UXP4 | 399804 |
| A2VVB3 | 350702 |
| A2VWP4 | 350702 |
| A2W1G1 | 350702 |
| A2W1I4 | 350702 |
| A2W7B3 | 350701 |
| A2W8P5 | 350701 |
| A3ELP4 | 345075 |
| A3EQC8 | 419542 |
| A3EV91 | 419542 |
| A3GGR1 | 4924   |
| A3GR24 | 417399 |
| A3H155 | 417400 |
| A3I6Q3 | 388400 |
| A3IEM3 | 388400 |
| A3IRU3 | 391612 |
| A3IY86 | 391612 |
| A3JAB7 | 270374 |
| A3JMT2 | 388401 |
| A3JTY8 | 388401 |
| A3JYN8 | 388399 |
| A3K8V5 | 388399 |

|        |        |
|--------|--------|
| A3KRG0 | 350704 |
| A3KY57 | 350704 |
| A3L9L4 | 350703 |
| A3LEP3 | 350703 |
| A3LU20 | 4924   |
| A3PIF0 | 349101 |
| A3RQN7 | 342110 |
| A3RYN0 | 342110 |
| A3SB79 | 52598  |
| A3SGB0 | 52598  |
| A3SI82 | 89187  |
| A3SJK8 | 89187  |
| A3SVG7 | 314267 |
| A3SWK6 | 314267 |
| A3TM83 | 313589 |
| A3TR71 | 313589 |
| A3TTT5 | 252305 |
| A3U3L9 | 252305 |
| A3UY16 | 314291 |
| A3V1U0 | 314232 |
| A3V4F0 | 314232 |
| A3V9K5 | 314271 |
| A3VJU0 | 314271 |
| A3VR94 | 314260 |
| A3VXD2 | 314264 |
| A3VYC0 | 314264 |
| A3WCN4 | 237727 |
| A3WU66 | 314253 |
| A3WWD4 | 314253 |
| A3XAZ2 | 314262 |
| A3XD03 | 314262 |
| A3XM62 | 398720 |
| A3Y2P4 | 314290 |
| A3YF22 | 314277 |
| A3YF59 | 314277 |
| A3YN73 | 360111 |
| A3YTB2 | 360108 |
| A3YY55 | 69042  |
| A3Z7T3 | 221360 |
| A3ZFU8 | 360112 |
| A3ZKI5 | 360110 |
| A3ZTL4 | 314230 |
| A4A900 | 314285 |
| A4AGE3 | 312284 |
| A4AUW5 | 313603 |
| A4BJ60 | 314283 |

|        |        |
|--------|--------|
| A4BLL9 | 314278 |
| A4BVJ0 | 314278 |
| A4BY79 | 313594 |
| A4CER5 | 87626  |
| A4CVP9 | 59931  |
| A4EEV9 | 391593 |
| A4EKK2 | 391593 |
| A4EQL7 | 388739 |
| A4ERG8 | 388739 |
| A4GJN5 | 415444 |
| A4KPE7 | 412422 |
| A4LJH5 | 425067 |
| A4LUK2 | 425067 |
| A4MW40 | 374927 |
| A4MW41 | 374927 |
| A4N1S5 | 375432 |
| A4N870 | 375177 |
| A4NDG2 | 374928 |
| A4NLZ9 | 374932 |
| A4NQ55 | 374933 |
| A4NW92 | 375063 |
| A4RD53 | 148305 |
| A4TZ97 | 55518  |
| A4U0T7 | 55518  |
| A4U2F2 | 55518  |
| A5DCX1 | 4929   |
| A5DEU6 | 4929   |
| A5F5F1 | 345073 |
| A5FFY8 | 376686 |
| A5J666 | 334802 |
| A5KHS7 | 398000 |
| A5KLA4 | 411460 |
| A5L188 | 391574 |
| A5LDK0 | 406556 |
| A5LMW4 | 406557 |
| A5LXG9 | 406558 |
| A5M3I2 | 406559 |
| A5M7L2 | 406560 |
| A5MGP7 | 406561 |
| A5MP83 | 406562 |
| A5MP84 | 406562 |
| A5MSR5 | 406563 |
| A5P8D1 | 161528 |
| A5TIF1 | 370895 |
| A5TSK7 | 393480 |
| A5UL49 | 420247 |



|        |        |
|--------|--------|
| A5XS50 | 334803 |
| A5Z8D6 | 411463 |
| A5ZLQ7 | 411901 |
| A5ZYM6 | 411459 |
| A6A6F8 | 417398 |
| A6AGG0 | 417397 |
| A6AS64 | 410291 |
| A6B5R4 | 419109 |
| A6BIJ6 | 411462 |
| A6BUX3 | 412420 |
| A6CAS9 | 344747 |
| A6CEN2 | 344747 |
| A6D7A5 | 391591 |
| A6DDK1 | 391592 |
| A6DPR2 | 313628 |
| A6DY52 | 391613 |
| A6E667 | 391613 |
| A6EQE9 | 50743  |
| A6F2W3 | 443152 |
| A6F536 | 443152 |
| A6FCC4 | 58051  |
| A6FIS1 | 58051  |
| A6FRB8 | 351016 |
| A6FU82 | 351016 |
| A6GEH6 | 391625 |
| A6GIC5 | 391625 |
| A6GJ21 | 391625 |
| A6GM55 | 391597 |
| A6GS69 | 391597 |
| A6NZF3 | 411467 |
| A6QFI7 | 426430 |
| A6QYH1 | 339724 |
| A6SEV6 | 332648 |
| A6URD4 | 406327 |
| A6Y082 | 404974 |
| A6Y6N0 | 345074 |
| A6ZNV6 | 307796 |
| A6ZRX6 | 307796 |
| A6ZXE9 | 307796 |
| A7A3F7 | 411481 |
| A7AK39 | 411477 |
| A7AYH5 | 411470 |
| A7BE59 | 411466 |
| A7BY33 | 422289 |
| A7F9M5 | 665079 |
| A7HCZ9 | 404589 |

|        |        |
|--------|--------|
| A7JDJ9 | 430557 |
| A7JFD9 | 430558 |
| A7JPC3 | 442346 |
| A7JU64 | 272629 |
| A7M3B6 | 411476 |
| A7V0M4 | 411479 |
| A7VC76 | 411489 |
| A7VNV2 | 428125 |
| A7VT64 | 428125 |
| A7X0J5 | 418127 |
| A7YR14 | 430556 |
| A8E983 | 360118 |
| A8EG84 | 360118 |
| A8KJ50 | 331978 |
| A8KTW7 | 331978 |
| A8NU10 | 240176 |
| A8QCA5 | 425265 |
| A8RY41 | 411902 |
| A8S7H2 | 411485 |
| A8SX95 | 411474 |
| A8T8G6 | 314289 |
| A8TMZ9 | 331869 |
| A8TTA3 | 331869 |
| A8UJQ1 | 391603 |
| A8US86 | 392423 |
| A8USM2 | 392423 |
| A8YAL3 | 267872 |
| A8YBI6 | 267872 |
| A8Z082 | 451516 |
| A9BGP5 | 403833 |
| A9D229 | 411684 |
| A9DB92 | 411684 |
| A9DLH7 | 391587 |
| A9DV85 | 391624 |
| A9E5V6 | 391624 |
| A9EKZ7 | 314608 |
| A9F8P0 | 383629 |
| A9FHR3 | 383629 |
| A9FPS3 | 391619 |
| A9FTR1 | 391619 |
| A9HS14 | 391595 |
| A9HVF8 | 391595 |
| A9JZR6 | 412021 |
| A9W659 | 419610 |
| A9Z8J8 | 373665 |
| B0A519 | 404214 |

|        |        |
|--------|--------|
| B0A9M8 | 445973 |
| B0AQJ5 | 486624 |
| B0D9Z2 | 486041 |
| B0G5U5 | 411461 |
| B0GJ33 | 404218 |
| B0GX24 | 404217 |
| B0H9V1 | 404216 |
| B0HGZ1 | 404215 |
| B0HRQ3 | 360099 |
| B0MIX5 | 411490 |
| B0MPI7 | 428128 |
| B0N940 | 445974 |
| B0ND18 | 411468 |
| B0NQ62 | 449673 |
| B0NXP5 | 411484 |
| B0PBC1 | 445972 |
| B0PBH3 | 445972 |
| B0Q2H2 | 486619 |
| B0QJ14 | 486621 |
| B0QT16 | 456298 |
| B0XN47 | 451804 |
| B1C4Q1 | 428126 |
| B1C9W0 | 445971 |
| B1EMJ2 | 502347 |
| B1EXN2 | 486623 |
| B1FB32 | 396596 |
| B1FJC7 | 396596 |
| B1FYA3 | 396598 |
| B1G9D2 | 396598 |
| B1GHA0 | 486620 |
| B1HBR0 | 320374 |
| B1HG31 | 320374 |
| B1HZL8 | 444177 |
| B1HZL9 | 444177 |
| B1QZX4 | 447214 |
| B1R1D5 | 447214 |
| B1S7G1 | 473819 |
| B1SFI4 | 471872 |
| B1SZA1 | 396597 |
| B1T9X4 | 396597 |
| B1UPR6 | 486622 |
| B1X5H2 | 39717  |
| B2D157 | 3712   |
| B2DNJ4 | 453363 |
| B2EB00 | 486409 |
| B2H1I3 | 331109 |

|        |        |
|--------|--------|
| B2H2D4 | 331109 |
| B2IPM2 | 516950 |
| B2J7L4 | 63737  |
| B2ND11 | 344610 |
| B2NWU1 | 444451 |
| B2PAZ8 | 444452 |
| B2PN01 | 444453 |
| B2Q2B0 | 471874 |
| B2SXF3 | 398527 |
| B2UP78 | 349741 |
| B2WKN1 | 426418 |
| B3A7L3 | 478004 |
| B3AUP6 | 478005 |
| B3B7S0 | 478006 |
| B3BN80 | 478008 |
| B3C1M9 | 478007 |
| B3CIP9 | 471870 |
| B3HFJ5 | 340184 |
| B3HY42 | 340197 |
| B3IBE3 | 340185 |
| B3IQ54 | 340186 |
| B3J961 | 405536 |
| B3JN27 | 470145 |
| B3LH66 | 285006 |
| B3LJF1 | 285006 |
| B3LNW3 | 285006 |
| B3T3A6 | 455568 |
| B3T4B1 | 455574 |
| B3T5X7 | 455578 |
| B3TAF1 | 455603 |
| B3TCF0 | 455612 |
| B3TCK7 | 455613 |
| B3V5P6 | 526639 |
| B3WR77 | 344601 |
| B3X4W1 | 358708 |
| B3XIL4 | 358709 |
| B3YL65 | 439842 |
| B3YX14 | 405917 |
| B3ZGF8 | 451707 |
| B3ZVW1 | 451709 |
| B4A3M5 | 454168 |
| B4AM30 | 536229 |
| B4ARV6 | 545422 |
| B4AWS2 | 497965 |
| B4B3Y2 | 497965 |
| B4B7I5 | 497965 |

|        |        |
|--------|--------|
| B4BQE3 | 495036 |
| B4D232 | 497964 |
| B4DBF9 | 497964 |
| B4V4A9 | 465541 |
| B4V574 | 465541 |
| B4VQW7 | 118168 |
| B4VRZ4 | 118168 |
| B4WG76 | 91464  |
| B4WMH5 | 91464  |
| B4WQ98 | 91464  |
| B4WXC9 | 236097 |
| B4X4L7 | 236097 |
| B5C202 | 439846 |
| B5C8P5 | 454165 |
| B5CS19 | 471875 |
| B5CXZ4 | 484018 |
| B5GJ39 | 465543 |
| B5H0F3 | 443255 |
| B5H3M9 | 443255 |
| B5H722 | 457429 |
| B5HJW6 | 457429 |
| B5HM74 | 463191 |
| B5ING5 | 180281 |
| B5J4W8 | 391626 |
| B5J9E5 | 391626 |
| B5JEF9 | 382464 |
| B5JEX9 | 382464 |
| B5JSG5 | 391615 |
| B5K8F6 | 391616 |
| B5K8N4 | 391616 |
| B5KJ60 | 51350  |
| B5KJ62 | 51351  |
| B5LAV3 | 4072   |
| B5ML48 | 439847 |
| B5MV75 | 440534 |
| B5N7Y2 | 454167 |
| B5NMC6 | 454231 |
| B5P5S8 | 454164 |
| B5PHV2 | 465518 |
| B5PV90 | 465516 |
| B5Q229 | 465517 |
| B5QFV5 | 478547 |
| B5S2B7 | 564065 |
| B5S9M5 | 305    |
| B5SA89 | 305    |
| B5SIJ0 | 564066 |

|        |        |
|--------|--------|
| B5UIC4 | 405533 |
| B5VAX9 | 451708 |
| B5VF91 | 545124 |
| B5VRZ8 | 545124 |
| B5W5P9 | 513049 |
| B5W9X5 | 513049 |
| B5W9X6 | 513049 |
| B5WFC3 | 516466 |
| B5WKI7 | 516466 |
| B5WNP7 | 516466 |
| B6AN22 | 419541 |
| B6ANX8 | 419541 |
| B6AXP6 | 314270 |
| B6AYN7 | 314270 |
| B6B711 | 439496 |
| B6BE88 | 439496 |
| B6BHX8 | 439483 |
| B6BQR8 | 439493 |
| B6BT71 | 439493 |
| B6BWJ2 | 314607 |
| B6C685 | 473788 |
| B6FS23 | 500632 |
| B6K1B6 | 402676 |
| B6QAU4 | 441960 |
| B6QAU5 | 441960 |
| B6R018 | 439495 |
| B6R7V7 | 439495 |
| B6SWN1 | 4577   |
| B6W1C7 | 483217 |
| B6WXT0 | 411464 |
| B6XKC9 | 520999 |
| B6XXL2 | 566552 |
| B6ZSE5 | 502346 |
| B7A8W7 | 498848 |
| B7A9U4 | 498848 |
| B7A9U6 | 498848 |
| B7AHE0 | 483216 |
| B7AQK9 | 483218 |
| B7CHH2 | 557724 |
| B7CJI2 | 557724 |
| B7DMS5 | 543302 |
| B7DVI5 | 543302 |
| B7FFB9 | 3880   |
| B7FLQ1 | 3880   |
| B7KIJ7 | 65393  |
| B7QRX7 | 439497 |
| B7QYF0 | 439497 |
| B7R898 | 391606 |
| B7RB76 | 443254 |
| B7RB77 | 443254 |
| B7RGZ1 | 391589 |
| B7RQ06 | 391589 |
| B7S2H6 | 247634 |
| B7WWN3 | 399795 |

|        |        |
|--------|--------|
| B7X0V2 | 399795 |
| B7X0V3 | 399795 |
| B8BLZ1 | 39946  |
| B8KCX2 | 391586 |
| B8KLW0 | 566466 |
| B8KUK0 | 565045 |
| B8L930 | 391601 |
| B8M2U2 | 441959 |
| B8PD45 | 561896 |
| B9AFN1 | 483214 |
| B9AG63 | 483214 |
| B9B3J6 | 513051 |
| B9B536 | 513051 |
| B9BQ31 | 513052 |
| B9BU44 | 513052 |
| B9CBJ7 | 513053 |
| B9CBW1 | 513053 |
| B9CVH3 | 553212 |
| B9D596 | 553218 |
| B9NRA6 | 467661 |
| B9NRD8 | 467661 |
| B9P2F2 | 93058  |
| B9QW62 | 244592 |
| B9R0E4 | 244592 |
| B9WX02 | 286604 |
| B9XB18 | 320771 |
| B9XNF8 | 320771 |
| B9YY96 | 279714 |
| C0A256 | 278957 |
| C0AEA7 | 278957 |
| C0AWH7 | 471881 |
| C0B728 | 470146 |
| C0BKB1 | 487796 |
| C0BR44 | 547043 |
| C0BWJ9 | 553973 |
| C0CLH8 | 476272 |
| C0CU78 | 518636 |
| C0DRR9 | 546274 |
| C0DZP7 | 566549 |
| C0EF38 | 537013 |
| C0ENH9 | 546264 |
| C0EU60 | 411469 |
| C0FPY7 | 622312 |
| C0G560 | 595497 |
| C0G7I7 | 595497 |
| C0GDS3 | 555088 |
| C0GHP2 | 555088 |
| C0N6S5 | 637616 |
| C0N9N4 | 637616 |
| C0NF36 | 447093 |
| C0P8I4 | 4577   |
| C0SDV3 | 482561 |
| C0VNQ1 | 525244 |
| C0VRK7 | 548477 |

|        |        |
|--------|--------|
| C0W316 | 525246 |
| C0WAT1 | 563191 |
| C0WHW2 | 525260 |
| C0WPK2 | 525318 |
| C0XN12 | 525327 |
| C0XU51 | 525263 |
| C0Y2R1 | 595498 |
| C0YEE7 | 595498 |
| C0YKN4 | 525257 |
| C1CVX4 | 546414 |
| C1FID7 | 296587 |
| C1G3U9 | 502780 |
| C1GHU8 | 502780 |
| C1H3Y8 | 502779 |
| C1HPN3 | 469598 |
| C1HXJ6 | 528345 |
| C1I926 | 457396 |
| C1IA85 | 457396 |
| C1MCI7 | 469595 |
| C1N4J5 | 564608 |
| C1NC19 | 457400 |
| C1PE06 | 345219 |
| C1V8I3 | 469382 |
| C2BKT1 | 525264 |
| C2BZ04 | 525367 |
| C2C529 | 592313 |
| C2CS87 | 525268 |
| C2D0W1 | 525310 |
| C2DN10 | 525281 |
| C2FX06 | 525372 |
| C2FX07 | 525372 |
| C2G5S5 | 548473 |
| C2GJE6 | 548478 |
| C2GSR6 | 548480 |
| C2HWQ0 | 593585 |
| C2I5B5 | 593586 |
| C2IJN0 | 593589 |
| C2IS56 | 593590 |
| C2JFB9 | 593587 |
| C2KM53 | 586220 |
| C2LIM8 | 525369 |
| C2LR08 | 596322 |
| C2LWA8 | 629742 |
| C2MI66 | 526973 |
| C2MY93 | 526980 |
| C2NF10 | 526970 |
| C2NWA2 | 526967 |
| C2PCC0 | 526971 |
| C2PTD5 | 526972 |
| C2Q9D7 | 526968 |
| C2QQE6 | 526977 |
| C2R5H9 | 526969 |
| C2RKH6 | 526974 |
| C2S169 | 526975 |



|        |        |
|--------|--------|
| C2SHQ0 | 526976 |
| C2SYD1 | 526978 |
| C2TDY2 | 526979 |
| C2TUP8 | 526981 |
| C2UBA1 | 526982 |
| C2USS2 | 526983 |
| C2V970 | 526984 |
| C2VR31 | 526985 |
| C2W5R9 | 526986 |
| C2WJV1 | 526987 |
| C2WM62 | 526987 |
| C2WZ79 | 526988 |
| C2X981 | 526989 |
| C2XRD6 | 526990 |
| C2Y7Z3 | 526991 |
| C2YP22 | 526992 |
| C2Z5A5 | 526993 |
| C2ZLX1 | 526994 |
| C3A3F6 | 526997 |
| C3AJE5 | 526998 |
| C3APH1 | 526998 |
| C3B0T0 | 526999 |
| C3B6W5 | 526999 |
| C3BHX6 | 527000 |
| C3BNV9 | 527000 |
| C3BZQ7 | 527024 |
| C3CG67 | 527021 |
| C3CZ23 | 527025 |
| C3DH90 | 527026 |
| C3E0Y9 | 527027 |
| C3EI82 | 527023 |
| C3EZ10 | 527022 |
| C3FHK3 | 527031 |
| C3G0C8 | 527032 |
| C3GG76 | 527029 |
| C3GYF3 | 527030 |
| C3HFW0 | 527028 |
| C3HXT8 | 527019 |
| C3IGW0 | 527020 |
| C3IY03 | 550542 |
| C3JNY6 | 596309 |
| C3JVJ3 | 596309 |
| C3Q6F9 | 457395 |
| C3QJC9 | 556258 |
| C3QP42 | 469590 |
| C3RF70 | 556260 |
| C3RJS4 | 556270 |
| C3TQV7 | 562    |
| C3X6V7 | 556268 |
| C3X7A0 | 556269 |
| C3XFW7 | 613026 |
| C3XKT5 | 556267 |
| C4APL4 | 320390 |
| C4ATU4 | 320390 |

|        |        |
|--------|--------|
| C4EY09 | 521005 |
| C4F2E8 | 521004 |
| C4FCH7 | 518635 |
| C4FJA6 | 432331 |
| C4FK94 | 432331 |
| C4FRW0 | 546273 |
| C4G7I2 | 592010 |
| C4GA07 | 626523 |
| C4GLX0 | 629741 |
| C4H2I2 | 547047 |
| C4HJG8 | 547046 |
| C4IEY6 | 632245 |
| C4IG98 | 632245 |
| C4IPX7 | 641140 |
| C4IR72 | 641140 |
| C4J3S6 | 4577   |
| C4RBA6 | 219305 |
| C4REA0 | 219305 |
| C4S227 | 349968 |
| C4SDX3 | 349967 |
| C4SIZ4 | 349966 |
| C4SW76 | 349965 |
| C4TRZ3 | 527012 |
| C4U060 | 527012 |
| C4UCL7 | 527002 |
| C4ULQ6 | 527005 |
| C4UY78 | 527004 |
| C4V3I3 | 638302 |
| C4WCT2 | 596319 |
| C4WE71 | 641118 |
| C4WFI6 | 641118 |
| C4WMA8 | 641118 |
| C4YFW0 | 5476   |
| C4YKP2 | 5476   |
| C4ZL29 | 85643  |
| C5DII8 | 559295 |
| C5DP09 | 559307 |
| C5E9D9 | 537937 |
| C5EF15 | 457421 |
| C5EZI5 | 537972 |
| C5FUW4 | 554155 |
| C5GKV1 | 559297 |
| C5H9M9 | 51351  |
| C5J4N7 | 3707   |
| C5J4N9 | 3707   |
| C5J4P1 | 3707   |
| C5K0P5 | 559298 |
| C5MZ49 | 450394 |
| C5NC34 | 436115 |
| C5NDS4 | 436115 |
| C5PAF9 | 222929 |
| C5PJU2 | 525373 |
| C5Q4E2 | 548474 |
| C5Q688 | 525374 |

|        |        |
|--------|--------|
| C5QHT0 | 548475 |
| C5QKQ0 | 548475 |
| C5QLP3 | 525378 |
| C5QUK8 | 525376 |
| C5RIH1 | 573061 |
| C5RMR5 | 573061 |
| C5RRZ9 | 573062 |
| C5S0P4 | 637911 |
| C5SI86 | 573065 |
| C5SK24 | 573065 |
| C5T5A8 | 573060 |
| C5TPH5 | 596320 |
| C5TV94 | 573059 |
| C5U2E7 | 573059 |
| C5U936 | 509193 |
| C5UX23 | 536233 |
| C5V3M8 | 395494 |
| C5V678 | 395494 |
| C5VA14 | 553207 |
| C5W368 | 511693 |
| C5ZCI0 | 357347 |
| C5ZJ88 | 357347 |
| C5ZVF3 | 537970 |
| C6EAY0 | 469008 |
| C6HP01 | 544712 |
| C6HYG3 | 412449 |
| C6HZV3 | 412449 |
| C6I7I8 | 457392 |
| C6IRQ7 | 469586 |
| C6IVA3 | 621372 |
| C6J4S5 | 621372 |
| C6J6H4 | 621372 |
| C6J9T8 | 457412 |
| C6KVT5 | 77133  |
| C6LJ70 | 478749 |
| C6M9J2 | 547045 |
| C6MF56 | 153948 |
| C6ML81 | 443143 |
| C6MN13 | 443143 |
| C6NS60 | 637389 |
| C6NS61 | 637389 |
| C6P8Q9 | 580327 |
| C6PQI3 | 536227 |
| C6QGH1 | 582899 |
| C6QIH1 | 582899 |
| C6QKF2 | 581103 |
| C6R4L8 | 553201 |
| C6R7K4 | 553206 |
| C6RIJ5 | 553219 |
| C6RQZ6 | 596318 |
| C6RT17 | 596318 |
| C6S2B7 | 661513 |
| C6SEE8 | 663926 |
| C6SM79 | 295996 |

|        |        |
|--------|--------|
| C6TSP4 | 320371 |
| C6TX44 | 320371 |
| C6YGE6 | 345072 |
| C6YN52 | 543737 |
| C6YTJ0 | 539329 |
| C6Z5G7 | 457394 |
| C7DAW2 | 633131 |
| C7DES7 | 633131 |
| C7GFU8 | 536231 |
| C7GMM8 | 574961 |
| C7H4B8 | 411483 |
| C7HGQ0 | 572545 |
| C7HGY2 | 572545 |
| C7HLI8 | 588857 |
| C7ILY9 | 588581 |
| C7ILZ0 | 588581 |
| C7INP1 | 588581 |
| C7IU29 | 589861 |
| C7JJK8 | 634453 |
| C7JTS6 | 634454 |
| C7K418 | 634455 |
| C7KD87 | 634456 |
| C7KMK3 | 634457 |
| C7KWW8 | 634458 |
| C7L6F5 | 634459 |
| C7XCB2 | 563193 |
| C7YJ23 | 660122 |
| C7YV47 | 660122 |
| C7ZVJ1 | 585143 |
| C7ZYU5 | 585143 |
| C8A327 | 585145 |
| C8A6D4 | 585145 |
| C8AAJ6 | 585146 |
| C8ADS3 | 585146 |
| C8AI70 | 585153 |
| C8ALG0 | 585153 |
| C8AQL2 | 585158 |
| C8ATW3 | 585158 |
| C8JRQ5 | 393124 |
| C8K2H1 | 393125 |
| C8KBS3 | 393128 |
| C8KNL2 | 452948 |
| C8KTD4 | 455227 |
| C8KX84 | 591023 |
| C8L3G4 | 553565 |
| C8L6G1 | 553565 |
| C8LCD6 | 553567 |
| C8LD70 | 553567 |
| C8LFX4 | 553568 |
| C8LPQ1 | 553571 |
| C8LUT2 | 553571 |
| C8LWV7 | 553573 |
| C8M2A4 | 553573 |
| C8M5C6 | 553581 |

|        |        |
|--------|--------|
| C8M6D8 | 553581 |
| C8MBT6 | 553583 |
| C8MIP8 | 553588 |
| C8MPJ2 | 553588 |
| C8MRC1 | 553592 |
| C8MWR7 | 553592 |
| C8MYW5 | 553596 |
| C8N4R0 | 553596 |
| C8N7F2 | 638300 |
| C8NR86 | 196164 |
| C8NXJ3 | 585529 |
| C8PLJ2 | 553220 |
| C8PZZ0 | 553217 |
| C8Q572 | 592316 |
| C8QAB0 | 592316 |
| C8RV49 | 525262 |
| C8RZN6 | 371731 |
| C8S015 | 371731 |
| C8SMV9 | 536019 |
| C8SX15 | 536019 |
| C8T8U5 | 667127 |
| C8TBF1 | 667127 |
| C8Z6C2 | 643680 |
| C8ZGC6 | 643680 |
| C8ZI69 | 643680 |
| C8ZY47 | 565653 |
| C9A795 | 565655 |
| C9AVD3 | 565652 |
| C9CJ24 | 565654 |
| C9CV77 | 644076 |
| C9D4A9 | 644076 |
| C9KJ09 | 500635 |
| C9KS70 | 483215 |
| C9L6E1 | 537007 |
| C9LU41 | 546271 |
| C9MB75 | 656913 |
| C9MG28 | 656912 |
| C9MXF8 | 634994 |
| C9MXF9 | 634994 |
| C9N7C9 | 591167 |
| C9NC11 | 591167 |
| C9NMX8 | 675814 |
| C9P1N8 | 675813 |
| C9PF85 | 675811 |
| C9PL75 | 675811 |
| C9PML0 | 667128 |
| C9Q6T2 | 675810 |
| C9QMA2 | 675816 |
| C9QS78 | 536056 |
| C9RDQ0 | 579137 |
| C9SFE9 | 526221 |
| C9SML8 | 526221 |
| C9SR17 | 526221 |
| C9T5D7 | 520459 |

|        |        |
|--------|--------|
| C9T8B9 | 520459 |
| C9TFF6 | 520460 |
| C9THJ4 | 520460 |
| C9TPA6 | 520463 |
| C9TR34 | 520463 |
| C9TUF7 | 520461 |
| C9TY22 | 520461 |
| C9U2S0 | 520454 |
| C9U527 | 520454 |
| C9UBY9 | 520452 |
| C9UE33 | 520452 |
| C9UL65 | 520451 |
| C9UNL5 | 520451 |
| C9UX72 | 520450 |
| C9UZL3 | 520450 |
| C9V9L1 | 520456 |
| C9VCC4 | 520456 |
| C9VGX4 | 520457 |
| C9VHZ0 | 520457 |
| C9VRV6 | 520455 |
| C9VT92 | 520455 |
| C9WZN5 | 604162 |
| C9X6A6 | 568708 |
| C9Y8F0 | 667019 |
| C9YAE3 | 667019 |
| D0AWZ0 | 575591 |
| D0B0W5 | 575591 |
| D0B2B0 | 224914 |
| D0B9M0 | 224914 |
| D0BC68 | 520488 |
| D0BEX9 | 520488 |
| D0BW26 | 575564 |
| D0CAH5 | 575584 |
| D0CH66 | 166314 |
| D0CPN4 | 644107 |
| D0CQ42 | 644107 |
| D0D0T6 | 501479 |
| D0D9X1 | 501479 |
| D0GDV2 | 520465 |
| D0GG81 | 520465 |
| D0GNC2 | 596323 |
| D0GQJ8 | 675806 |
| D0H242 | 675807 |
| D0HHY3 | 675820 |
| D0HTN7 | 675808 |
| D0I2M5 | 675809 |
| D0I8F3 | 675812 |
| D0IMA5 | 675815 |
| D0JEP3 | 637382 |
| D0JP60 | 637385 |
| D0KRH6 | 555311 |
| D0P925 | 520489 |
| D0PC10 | 520489 |
| D0PK01 | 520487 |

|        |        |
|--------|--------|
| D0PLR5 | 520487 |
| D0RGJ9 | 437701 |
| D0RJ59 | 437701 |
| D0RNJ0 | 684719 |
| D0RPU8 | 684719 |
| D0RU58 | 469609 |
| D0S5E6 | 575585 |
| D0SD03 | 575586 |
| D0SMY5 | 575587 |
| D0SSD1 | 575588 |
| D0T6Q2 | 575589 |
| D0TGX7 | 469589 |
| D0TXC5 | 469588 |
| D0VY45 | 34305  |
| D0W1D2 | 546262 |
| D0W7D2 | 546265 |
| D0WHP2 | 649764 |
| D0WN48 | 649743 |
| D0WT23 | 674977 |
| D0X9C1 | 673519 |
| D0XMR0 | 633149 |
| D0Z099 | 675817 |
| D0ZJU2 | 588858 |
| D1CWL8 | 520449 |
| D1CX49 | 520449 |
| D1D5M4 | 528346 |
| D1DD24 | 528352 |
| D1DJ04 | 528354 |
| D1DNV2 | 528356 |
| D1DVS1 | 528355 |
| D1E2H7 | 528358 |
| D1E8T7 | 528359 |
| D1EF95 | 528360 |
| D1ENK7 | 520462 |
| D1ERH3 | 520462 |
| D1EWZ7 | 520464 |
| D1EY96 | 520464 |
| D1F7U6 | 520466 |
| D1FA76 | 520466 |
| D1FEL5 | 520458 |
| D1FJD7 | 520458 |
| D1GQK1 | 663951 |
| D1GRM8 | 663951 |
| D1JEY9 | 115547 |
| D1JS94 | 469587 |
| D1K0G2 | 457391 |
| D1KBM1 | 655186 |
| D1NJJ1 | 492476 |
| D1NNE3 | 492476 |
| D1NVW5 | 561180 |
| D1P451 | 500637 |
| D1PA78 | 537011 |
| D1PMT1 | 411471 |
| D1PZE7 | 585502 |

|        |        |
|--------|--------|
| D1Q4Y8 | 545431 |
| D1Q9L1 | 553594 |
| D1QBP1 | 553594 |
| D1QGK8 | 553601 |
| D1QKM9 | 553601 |
| D1R0D8 | 553574 |
| D1R3Q2 | 553574 |
| D1RPH9 | 682634 |
| D1RX02 | 682634 |
| D1S1G3 | 644283 |
| D1S8Q5 | 644283 |
| D1SQQ4 | 643561 |
| D1SSJ8 | 643561 |
| D1TU26 | 687916 |
| D1U5H1 | 643562 |
| D1U9X7 | 643562 |
| D1URS6 | 640510 |
| D1UTR7 | 640510 |
| D1VNZ8 | 298654 |
| D1VQS3 | 298654 |
| D1WII5 | 596317 |
| D1WZM9 | 649189 |
| D1X323 | 649189 |
| D1XDZ0 | 647653 |
| D1XFE8 | 647653 |
| D1Y9A0 | 679194 |
| D1YNY4 | 686660 |
| D1YVP6 | 304371 |
| D2AHV4 | 591020 |
| D2ALA8 | 510831 |
| D2ATJ4 | 479432 |
| D2CL18 | 54398  |
| D2EQQ9 | 563037 |
| D2ES80 | 585543 |
| D2F5K8 | 585149 |
| D2F8W5 | 585149 |
| D2FFA3 | 585151 |
| D2FNW9 | 585152 |
| D2FU02 | 585159 |
| D2FX95 | 585159 |
| D2FZY3 | 585160 |
| D2G2Z9 | 585160 |
| D2G8D1 | 585161 |
| D2GBG3 | 585161 |
| D2GHZ3 | 585148 |
| D2GP47 | 585150 |
| D2GTH8 | 585150 |
| D2L0J0 | 644968 |
| D2L8F4 | 644968 |
| D2LID2 | 648757 |
| D2LII0 | 648757 |
| D2M5L9 | 652103 |
| D2MBT1 | 652103 |
| D2MK46 | 700750 |



|        |        |
|--------|--------|
| D2MVX9 | 683083 |
| D2N8Y6 | 523796 |
| D2NBN2 | 431946 |
| D2T4H9 | 644651 |
| D2U1R2 | 638    |
| D2UP57 | 585155 |
| D2UQS2 | 585147 |
| D2UTD9 | 585147 |
| D2UXY9 | 5762   |
| D2YDD8 | 671074 |
| D2YRQ7 | 671076 |
| D2Z713 | 469381 |
| D2Z9L2 | 500639 |
| D2ZJG1 | 500639 |
| D2ZNG4 | 521002 |
| D2ZNY5 | 521002 |
| D2ZTU9 | 546266 |
| D3A670 | 546268 |
| D3AIV9 | 566550 |
| D3BWQ2 | 653733 |
| D3BZ11 | 653733 |
| D3C957 | 648999 |
| D3C9C8 | 648999 |
| D3D042 | 102897 |
| D3D049 | 102897 |
| D3EV70 | 703339 |
| D3EY86 | 703339 |
| D3FPI6 | 567106 |
| D3H457 | 216592 |
| D3I0W9 | 575611 |
| D3L3K4 | 592015 |
| D3LBM8 | 655225 |
| D3LLV6 | 596312 |
| D3LVK6 | 699218 |
| D3M3L1 | 656024 |
| D3M3M7 | 656024 |
| D3MCE0 | 679195 |
| D3MKB4 | 686659 |
| D3MUY4 | 547146 |
| D3MV04 | 547146 |
| D3N2S1 | 640512 |
| D3N9M6 | 640512 |
| D3NIE5 | 663278 |
| D3NM44 | 663278 |
| D3R3B7 | 552531 |
| D3RYJ8 | 589924 |
| D3S6J7 | 644281 |
| D3U0T3 | 118101 |
| D4B0A2 | 663331 |
| D4BF67 | 500640 |
| D4BLX3 | 518634 |
| D4C0G4 | 521000 |
| D4CH96 | 411486 |
| D4CNM6 | 608534 |

|        |        |
|--------|--------|
| D4CVW3 | 546275 |
| D4DIY3 | 663202 |
| D4DS42 | 546263 |
| D4DX80 | 667129 |
| D4E7R6 | 667129 |
| D4F239 | 500638 |
| D4FM58 | 525375 |
| D4FTC9 | 655813 |
| D4FZN8 | 645657 |
| D4IX80 | 657324 |
| D4IX81 | 657324 |
| D4JBR9 | 717962 |
| D4JF95 | 717960 |
| D4JH58 | 657317 |
| D4JT95 | 657319 |
| D4K0X5 | 718252 |
| D4K851 | 657322 |
| D4KGT6 | 657316 |
| D4KKZ5 | 657315 |
| D4L445 | 718255 |
| D4L536 | 657321 |
| D4LEP6 | 213810 |
| D4LM70 | 657323 |
| D4M638 | 657313 |
| D4MM93 | 717961 |
| D4N1A6 | 245018 |
| D4PN54 | 393117 |
| D4PV40 | 393131 |
| D4Q362 | 401650 |
| D4S1N7 | 511680 |
| D4S4G1 | 585503 |
| D4SAB8 | 585531 |
| D4SD13 | 585531 |
| D4SYR9 | 427081 |
| D4T7B1 | 427082 |
| D4TE40 | 533240 |
| D4TLB2 | 533240 |
| D4TNH2 | 533247 |
| D4TQP9 | 533247 |
| D4TXB9 | 649742 |
| D4U2J0 | 553590 |
| D4U765 | 553590 |
| D4UDH8 | 553580 |
| D4UHS5 | 553580 |
| D4URP0 | 246199 |
| D4V5Y9 | 702446 |
| D4VF84 | 702447 |
| D4WM24 | 702443 |
| D4WY67 | 702444 |
| D4X5T7 | 742159 |
| D4XTN3 | 707232 |
| D4XXV8 | 552811 |
| D4XXW2 | 552811 |
| D4Y3S6 | 634956 |

|         |        |
|---------|--------|
| D4YKP2  | 585530 |
| D4ZPE6  | 696747 |
| D4ZWG6  | 696747 |
| D5AK53  | 423211 |
| D5AK54  | 423211 |
| D5CV06  | 714962 |
| D5EAA6  | 547558 |
| D5GJ82  | 39416  |
| D5HB86  | 761659 |
| D5HB91  | 761659 |
| D5HHT4  | 751585 |
| D5KUG5  | 4932   |
| D5MF72  | 671143 |
| D5N152  | 703612 |
| D5NDS7  | 243261 |
| D5NJX7  | 243261 |
| D5NVD1  | 649754 |
| D5P919  | 525368 |
| D5PKD7  | 525370 |
| D5Q1E2  | 525259 |
| D5QCA8  | 714995 |
| D5QLC9  | 595536 |
| D5QSZ7  | 595536 |
| D5R4T5  | 642492 |
| D5R5P5  | 642492 |
| D5R5P6  | 642492 |
| D5RIV0  | 525371 |
| D5RW35  | 525258 |
| D5S8A1  | 760570 |
| D5SFP8  | 762948 |
| D5TFC4  | 573236 |
| D5VRC2  | 573063 |
| D5VTV1  | 573063 |
| D5WAV0  | 640511 |
| D5XNL4  | 515617 |
| D5Y9W2  | 520141 |
| D5YLG0  | 520140 |
| D5YXY3  | 515616 |
| D5ZAT5  | 537209 |
| D5ZVU9  | 566461 |
| D6A3U0  | 566461 |
| D6AAAY9 | 457431 |
| D6AQS9  | 457431 |
| D6B052  | 457425 |
| D6B8U3  | 457425 |
| D6CSZ4  | 426114 |
| D6DAL8  | 722911 |
| D6DGK6  | 717608 |
| D6DX46  | 718254 |
| D6DYT4  | 657318 |
| D6E6J3  | 657308 |
| D6E7T8  | 657308 |
| D6EEB7  | 457428 |
| D6ERP4  | 457428 |

|        |        |
|--------|--------|
| D6FTX5 | 611304 |
| D6GI24 | 469608 |
| D6GMK7 | 469608 |
| D6GYG4 | 585156 |
| D6HIR1 | 585156 |
| D6H883 | 528348 |
| D6HFH5 | 585144 |
| D6HIN7 | 585144 |
| D6HR67 | 552396 |
| D6I4X0 | 550672 |
| D6II37 | 550676 |
| D6IJY3 | 656380 |
| D6J254 | 585157 |
| D6J5T7 | 550677 |
| D6JM63 | 528351 |
| D6JVN6 | 575565 |
| D6K047 | 645465 |
| D6K1X7 | 645465 |
| D6KKJ8 | 457416 |
| D6KRX8 | 450749 |
| D6KY17 | 641147 |
| D6LDS9 | 469621 |
| D6LLV7 | 520448 |
| D6LPN6 | 520448 |
| D6LWE3 | 585154 |
| D6LZR8 | 585154 |
| D6M4H6 | 465543 |
| D6SES1 | 548470 |
| D6SFM0 | 548470 |
| D6SQU8 | 555779 |
| D6SS74 | 555779 |
| D6T6U5 | 553577 |
| D6T9R9 | 553577 |
| D6TBI4 | 485913 |
| D6TJ31 | 485913 |
| D6UBW0 | 762962 |
| D6UDK5 | 762962 |
| D6UUE2 | 682795 |
| D6V2N6 | 666684 |
| D6V5Q6 | 666684 |
| D6VJC6 | 596153 |
| D6VJC7 | 596153 |
| D6VRH0 | 559292 |
| D6W2G7 | 559292 |
| D6XBK2 | 463191 |
| D7AJM9 | 663917 |
| D7C5A7 | 749414 |
| D7CCD1 | 749414 |
| D7CX02 | 649638 |
| D7E8M8 | 644295 |
| D7EX23 | 515615 |
| D7GZS5 | 520453 |
| D7H2M2 | 520453 |
| D7HPW6 | 412967 |

|        |        |
|--------|--------|
| D7HX61 | 693985 |
| D7IIG4 | 469585 |
| D7IRY9 | 469592 |
| D7J8R6 | 585544 |
| D7JHP1 | 656379 |
| D7KAE4 | 457390 |
| D7KGE8 | 81972  |
| D7KRQ1 | 81972  |
| D7M1L9 | 81972  |
| D7MZ21 | 641149 |
| O04973 | 28526  |
| O04974 | 28526  |
| O59736 | 4896   |
| O85070 | 118101 |
| O87198 | 262724 |
| P06208 | 4932   |
| P48570 | 4932   |
| P58898 | 98799  |
| P94907 | 1126   |
| Q01FR2 | 70448  |
| Q01Z83 | 234267 |
| Q02141 | 1360   |
| Q05XR9 | 221359 |
| Q065B6 | 313625 |
| Q08ME7 | 378806 |
| Q096Y3 | 378806 |
| Q0CZN6 | 341663 |
| Q0F2J9 | 314345 |
| Q0FCE5 | 367336 |
| Q0FG53 | 367336 |
| Q0FL30 | 314265 |
| Q0FMQ1 | 314265 |
| Q0G5V7 | 314231 |
| Q0HE65 | 60480  |
| Q0IUQ0 | 39947  |
| Q0YPL2 | 377431 |
| Q0YQD3 | 377431 |
| Q0YQD6 | 377431 |
| Q12166 | 4932   |
| Q12726 | 4952   |
| Q12X21 | 259564 |
| Q1IMI1 | 204669 |
| Q1JRZ0 | 81972  |
| Q1JRZ1 | 81972  |
| Q1JRZ2 | 81972  |
| Q1JRZ3 | 115915 |
| Q1JRZ4 | 115915 |
| Q1JRZ5 | 115915 |
| Q1JRZ6 | 97979  |
| Q1JRZ7 | 97979  |
| Q1JRZ8 | 97979  |
| Q1JRZ9 | 59691  |
| Q1JS00 | 59691  |
| Q1JS01 | 59691  |

|        |        |
|--------|--------|
| Q1JY32 | 281689 |
| Q1K340 | 281689 |
| Q1N0C6 | 207949 |
| Q1N6M9 | 207949 |
| Q1NB58 | 314266 |
| Q1NR58 | 262489 |
| Q1NSC1 | 262489 |
| Q1NYU8 | 374675 |
| Q1Q0M4 | 174633 |
| Q1Q5P8 | 174633 |
| Q1UZJ8 | 314261 |
| Q1V0A5 | 314261 |
| Q1V6T3 | 314288 |
| Q1VVM5 | 313595 |
| Q1YLU2 | 287752 |
| Q1YRP0 | 314287 |
| Q1Z4R3 | 314280 |
| Q1ZFE7 | 314282 |
| Q1ZM14 | 314292 |
| Q24M83 | 9      |
| Q28QY6 | 290400 |
| Q2B6M7 | 313627 |
| Q2BKT8 | 207954 |
| Q2BR03 | 207954 |
| Q2BZP9 | 121723 |
| Q2CD25 | 314256 |
| Q2CGZ5 | 314256 |
| Q2FKU8 | 323259 |
| Q2FSZ7 | 323259 |
| Q2H478 | 38033  |
| Q2RAP8 | 39947  |
| Q2VP65 | 115547 |
| Q2Y4F2 | 115547 |
| Q30DX9 | 69183  |
| Q39891 | 3847   |
| Q3EX79 | 339854 |
| Q3R3J5 | 155920 |
| Q3R938 | 155920 |
| Q3RFR8 | 155919 |
| Q46ET8 | 269797 |
| Q4BZE1 | 165597 |
| Q4C7B5 | 165597 |
| Q4EH15 | 267410 |
| Q4EQF2 | 267409 |
| Q4HEA1 | 306254 |
| Q4MSM6 | 269801 |
| Q4P6Z8 | 5270   |
| Q4ZHS8 | 77133  |
| Q57926 | 2190   |
| Q59YF1 | 5476   |
| Q5AB86 | 5476   |
| Q5FAL5 | 3712   |
| Q5HHA8 | 93062  |
| Q5KIZ5 | 5207   |

|        |        |
|--------|--------|
| Q5SH16 | 300852 |
| Q5WQ07 | 261317 |
| Q5XQB0 | 285360 |
| Q60D83 | 3712   |
| Q60D84 | 3712   |
| Q64D65 | 285362 |
| Q6B1Y9 | 4932   |
| Q6BW96 | 4959   |
| Q6BY18 | 4959   |
| Q6CIW1 | 28985  |
| Q6CM17 | 28985  |
| Q6FP59 | 5478   |
| Q6FT78 | 5478   |
| Q6GAU9 | 282459 |
| Q6GIB0 | 282458 |
| Q703X8 | 2271   |
| Q71QG1 | 3712   |
| Q7A1B0 | 196620 |
| Q7A6G4 | 158879 |
| Q847R4 | 35779  |
| Q8PY62 | 2209   |
| Q8RL85 | 1422   |
| Q8TI92 | 2214   |
| Q8TYM1 | 2320   |
| Q8VX04 | 3702   |
| Q99VB3 | 158878 |
| Q9LPR4 | 3702   |
| A0L6V8 | 156889 |
| A1AUN8 | 338966 |
| A1BHQ7 | 290317 |
| A1K2W3 | 62928  |
| A1WTR1 | 349124 |
| A3PLR8 | 349101 |
| A4J6Z6 | 349161 |
| A4JRK9 | 269482 |
| A4SFU4 | 290318 |
| A4VJ96 | 379731 |
| A4WRZ5 | 349102 |
| A4YYU2 | 114615 |
| A5ENS4 | 288000 |
| A5FPD6 | 216389 |
| A5G6V7 | 351605 |
| A5N918 | 431943 |
| A6LPH9 | 290402 |
| A6LV02 | 290402 |
| A7IBL6 | 78245  |
| A8IIC6 | 438753 |
| A8L6W7 | 298653 |
| A9BIA5 | 403833 |
| A9H5Z1 | 272568 |
| B0TAQ1 | 498761 |
| B0TDH7 | 498761 |
| B0UAP6 | 426117 |
| B1I3K4 | 477974 |

|        |        |
|--------|--------|
| B1VMJ5 | 455632 |
| B1WPB8 | 43989  |
| B1Y707 | 395495 |
| B2IEU7 | 395963 |
| B2J701 | 63737  |
| B2JYB9 | 391038 |
| B2KBD6 | 445932 |
| B2THY7 | 508765 |
| B2UXP8 | 508767 |
| B3DXX9 | 481448 |
| B3E299 | 398767 |
| B3EHJ3 | 290315 |
| B3EL77 | 331678 |
| B3QB34 | 395960 |
| B3QQ09 | 517417 |
| B3QSR5 | 517418 |
| B4S9H2 | 290512 |
| B4SC35 | 324925 |
| B5ECQ1 | 404380 |
| B5ER60 | 380394 |
| B5XPG2 | 507522 |
| B5YFP3 | 289376 |
| B6IXL8 | 414684 |
| B6YRB4 | 511995 |
| B7JA83 | 243159 |
| B7JWX3 | 41431  |
| B7KG83 | 65393  |
| B7TB41 | 713887 |
| B8DR73 | 883    |
| B8EJ12 | 395965 |
| B8FAB3 | 439235 |
| B8FP49 | 272564 |
| B8FZP5 | 272564 |
| B8HWE6 | 395961 |
| B9E2F6 | 583346 |
| B9KKS7 | 557760 |
| B9M0S1 | 316067 |
| C0QKL7 | 177437 |
| C1DH20 | 322710 |
| C4L9I8 | 595494 |
| C5BTG0 | 377629 |
| C6BX35 | 526222 |
| C6C8U5 | 579405 |
| C6E9A3 | 443144 |
| C7LNR6 | 525897 |
| C7QV24 | 395962 |
| C7RQK4 | 522306 |
| C8W230 | 485916 |
| C8WE03 | 622759 |
| C9XM62 | 645462 |
| C9YJL2 | 645463 |
| D1KS34 | 640131 |
| D2BJU3 | 311424 |
| D3DID5 | 608538 |



|        |        |
|--------|--------|
| D3NSB3 | 137722 |
| D3RTC3 | 572477 |
| D3SKQ6 | 633145 |
| D3SPG6 | 638303 |
| D4GMW4 | 706191 |
| D4H6W4 | 522772 |
| D5ARX1 | 272942 |
| D5CPA5 | 580332 |
| D5EQN0 | 583355 |
| D5V3P1 | 572480 |
| D5WN34 | 640511 |
| D6Z0A9 | 589865 |
| D7CKQ7 | 643648 |
| D7E3V7 | 551115 |
| P58637 | 103690 |
| Q07HZ4 | 316055 |
| Q0AZZ0 | 335541 |
| Q0RAV3 | 326424 |
| Q13C65 | 316057 |
| Q13N13 | 266265 |
| Q18A29 | 272563 |
| Q20Y13 | 316056 |
| Q24PJ1 | 138119 |
| Q24QM0 | 138119 |
| Q2J1G8 | 316058 |
| Q2J4F7 | 106370 |
| Q2JP75 | 321332 |
| Q2JTM1 | 321327 |
| Q2RS26 | 269796 |
| Q2W709 | 342108 |
| Q39XU0 | 269799 |
| Q3A2Q7 | 338963 |
| Q3AD34 | 246194 |
| Q3AR85 | 340177 |
| Q3B2P8 | 319225 |
| Q3J0I3 | 272943 |
| Q3M5U0 | 240292 |
| Q3M625 | 240292 |
| Q3MEM4 | 240292 |
| Q3Z640 | 243164 |
| Q3ZW76 | 255470 |
| Q44290 | 103690 |
| Q47G84 | 159087 |
| Q60C57 | 414    |
| Q6D300 | 29471  |
| Q6N102 | 1076   |
| Q7M8U7 | 844    |
| Q8KC96 | 1097   |
| Q97MD7 | 1488   |
| Q9RQC0 | 542    |
| A0YP05 | 313612 |
| A0ZAX8 | 313624 |
| A1KYC7 | 43989  |
| A1KYI9 | 309035 |

|        |        |
|--------|--------|
| A1VPP0 | 365044 |
| A2V893 | 167942 |
| A3IL18 | 391612 |
| A4TZW9 | 55518  |
| B0AC54 | 445973 |
| B1R1V6 | 447214 |
| B4AZB2 | 497965 |
| B4WR31 | 91464  |
| B6G170 | 500633 |
| C0GHS8 | 555088 |
| C1IAR6 | 457396 |
| C4IMK3 | 632245 |
| C5RN57 | 573061 |
| C5RQ83 | 573061 |
| C5TI33 | 555217 |
| C5UUQ4 | 536233 |
| C6MRT0 | 443143 |
| C6PCG7 | 580327 |
| C8Q2L5 | 592316 |
| C8S0S2 | 371731 |
| D1WUS8 | 649189 |
| D2M8F4 | 652103 |
| D3BYV3 | 653733 |
| D3DE76 | 102897 |
| D3M538 | 656024 |
| D3MPC2 | 596329 |
| D4TIC9 | 533240 |
| D4Y040 | 552811 |
| D5N782 | 243261 |
| D5Q163 | 525259 |
| D5RWB3 | 525258 |
| D6AQL6 | 457431 |
| D6GAU9 | 469608 |
| P05342 | 354    |
| P05345 | 573    |
| P23122 | 355    |
| P54610 | 1857   |
| Q00853 | 1501   |
| Q01181 | 1063   |
| Q07179 | 1061   |
| Q0YUZ6 | 377431 |
| Q0ZQ46 | 359131 |
| Q1K1F5 | 281689 |
| Q47884 | 1859   |
| Q4C2Z5 | 165597 |
| Q52070 | 549    |
| Q53UA5 | 2698   |
| Q7BKY3 | 1520   |
| Q8RKT1 | 47227  |
| Q9FA12 | 33996  |
| Q9L4J8 | 1172   |
| Q9L4J9 | 1172   |

**saccharopine  
dehydrogenase**

**saccharopine  
dehydrogenase**

**LysW**

**(NADP+, L-glutamate forming)**

| <b>UniProt</b> | <b>TXID</b> |
|----------------|-------------|
| P38999         | 4932        |
| D6W1M5         | 559292      |
| C7GLK7         | 574961      |
| B5VR75         | 545124      |
| B3LPJ3         | 285006      |
| A6ZSC4         | 307796      |
| C8ZFS9         | 643680      |
| Q6FWR8         | 5478        |
| Q6CSQ4         | 28985       |
| A7TFY2         | 436907      |
| C5DWU2         | 559307      |
| B2G4L1         | 4956        |
| B2G3V4         | 4956        |
| B2G3U5         | 4956        |
| C5DC40         | 559295      |
| C4R4U1         | 644223      |
| Q75DA8         | 33169       |
| C4YP33         | 5476        |
| Q5A2W3         | 5476        |
| C4Y7M8         | 306902      |
| C5MI17         | 294747      |
| Q9C2G6         | 5141        |
| Q2HB62         | 38033       |
| Q9P4R4         | 148305      |
| C5PG82         | 222929      |
| A6SQH9         | 332648      |
| Q4WQ27         | 5085        |
| B0Y6W5         | 451804      |
| Q5B1H9         | 162425      |
| C8VG04         | 227321      |
| C0NJU5         | 447093      |
| A6QW18         | 339724      |
| Q2UJT2         | 5062        |
| B8N3C2         | 332952      |
| B8LW01         | 441959      |
| B6QQG5         | 441960      |
| O59711         | 4896        |
| C5JXA5         | 559298      |
| C0S6P3         | 482561      |
| Q0UFZ0         | 13684       |
| C5FUG2         | 554155      |
| A5DLT8         | 4929        |
| B0CXB5         | 486041      |
| Q4P245         | 5270        |

**(NAD+, L-lysine forming)**

| <b>UniProt</b> | <b>TXID</b> |
|----------------|-------------|
| P38998         | 4932        |
| D6VVW5         | 559292      |
| C7GLS2         | 574961      |
| B5VKX1         | 545124      |
| B3LTH6         | 285006      |
| A6ZVV4         | 307796      |
| C8ZAT6         | 643680      |
| C5DUQ8         | 559307      |
| Q6FU27         | 5478        |
| C5DDF5         | 559295      |
| Q6CP29         | 28985       |
| A7TPI1         | 436907      |
| A5E7N5         | 36914       |
| A3GF76         | 4924        |
| Q6BUY2         | 4959        |
| C4Y8H9         | 306902      |
| B9WGI1         | 573826      |
| C4QX51         | 644223      |
| C5MDX3         | 294747      |
| Q75BV4         | 33169       |
| P43065         | 5476        |
| C4YGU8         | 5476        |
| A5DQ14         | 4929        |
| P38997         | 4952        |
| Q7SFX6         | 5141        |
| B6K2C0         | 402676      |
| C9SQX9         | 526221      |
| B2AYG0         | 5145        |
| D5GCD9         | 39416       |
| Q09694         | 4896        |
| D1ZGX9         | 5147        |
| A7ELG9         | 665079      |
| Q0CNM1         | 341663      |
| B2W3J7         | 426418      |
| A6RLN2         | 332648      |
| Q4WY41         | 5085        |
| B0XXB5         | 451804      |
| A1D6Q4         | 331117      |
| B6Q4A4         | 441960      |
| B6HC95         | 500485      |
| Q0U4J1         | 13684       |
| B8N1M4         | 332952      |
| A2QDL3         | 425011      |
| B8M547         | 441959      |

| <b>UniProt</b> | <b>TXID</b> |
|----------------|-------------|
| Q5SH22         | 300852      |
| Q9ZND7         | 274         |
| B7A8X3         | 498848      |
| D3PNS8         | 504728      |
| D7B9U5         | 526227      |
| A1RR75         | 384616      |
| A3MT39         | 410359      |
| A4WJI1         | 340102      |
| A4YD42         | 399549      |
| A5US64         | 357808      |
| A7NPM4         | 383372      |
| A8ACC6         | 453591      |
| A9A1K4         | 436308      |
| A9B808         | 316274      |
| A9WD14         | 324602      |
| A9WD15         | 324602      |
| B1L529         | 374847      |
| B1VMJ6         | 455632      |
| B1YB52         | 444157      |
| B8G9T3         | 326427      |
| B8G9T4         | 326427      |
| B9KZQ2         | 309801      |
| B9LI61         | 480224      |
| B9LI62         | 480224      |
| B9LTZ4         | 416348      |
| C1CVR6         | 546414      |
| C3MJ47         | 429572      |
| C3MYT9         | 427317      |
| C3MZU4         | 427318      |
| C3N869         | 439386      |
| C3NF43         | 419942      |
| C4KJ27         | 426118      |
| C7NPR1         | 519442      |
| C7NZZ4         | 485914      |
| C7QK76         | 479433      |
| D1B8S6         | 525903      |
| D1C6B3         | 479434      |
| D1CE81         | 525904      |
| D2PE56         | 425944      |
| D2RUT7         | 543526      |
| D3SUS8         | 547559      |
| D4GYP2         | 309800      |
| Q05E08         | 56636       |
| Q18E34         | 362976      |

|        |        |        |        |        |        |
|--------|--------|--------|--------|--------|--------|
| D4DC41 | 663202 | A1CKSO | 5057   | Q1IZ85 | 319795 |
| C5GWE1 | 559297 | Q870G1 | 162425 | Q3IME0 | 348780 |
| D2VWF2 | 5762   | C8VJB0 | 227321 | Q4JAQ0 | 2285   |
| Q99K67 | 10090  | A4RKX5 | 148305 | Q5JFV9 | 311400 |
| Q3UEQ9 | 10090  | Q2UKP1 | 5062   | Q5UZ48 | 2238   |
| Q3UWN2 | 10090  | Q2HFZ2 | 38033  | Q6KYZ4 | 263820 |
| D4ACE9 | 10116  | C5JV27 | 559298 | Q72HE5 | 262724 |
| D4A608 | 10116  | C5GPV4 | 559297 | Q88Z74 | 1590   |
| A2VCW9 | 10116  | D4ANC1 | 663331 | Q8U0B8 | 2261   |
| Q5XLU9 | 8022   | C5FBR9 | 554155 | Q8ZU98 | 13773  |
| Q6GN76 | 8355   | C1H506 | 502779 | Q976J8 | 111955 |
| B0W052 | 7176   | Q5KHJ2 | 5207   | Q980W8 | 2287   |
| Q5I0C2 | 8364   | A8N200 | 240176 | A0RXL0 | 46770  |
| D7EHU4 | 7070   | C6HLP4 | 544712 | A8M8Q7 | 397948 |
| Q54NG9 | 44689  | A6QUT9 | 339724 | B3T3B2 | 455568 |
| A7SDG1 | 45351  | C1L3C4 | 5127   | B5GG72 | 465543 |
| Q8H770 | 3635   | A9UYX5 | 81824  | C1V897 | 469382 |
| A3XL75 | 398720 | C7Z0M9 | 660122 | C9N7U4 | 591167 |
| A3HXU2 | 388413 | C5PF70 | 222929 | D0KRK5 | 555311 |
| Q1VW87 | 313595 | B0CQP7 | 486041 | D1WUS7 | 649189 |
| A4AVY8 | 313603 | C0NQ08 | 447093 | D2Z853 | 469381 |
| A5FK66 | 376686 | D4D7C7 | 663202 | D7B9U6 | 526227 |
| A6ES54 | 50743  | C1GFV8 | 502780 |        |        |
| A4BZY1 | 313594 | C0SDQ1 | 482561 |        |        |
| A3U5A5 | 216432 | Q4P6J5 | 5270   |        |        |
| A9DKV3 | 391587 | C4JL09 | 336963 |        |        |
| A8UJ36 | 391603 | A8PQZ8 | 425265 |        |        |
| B7PT93 | 6945   | D4ZD03 | 637905 |        |        |
| C0BLE5 | 487797 | A7S2W5 | 45351  |        |        |
| B9NLJ0 | 467661 | C9CZ35 | 644076 |        |        |
| Q5LNA3 | 89184  | D0CTY5 | 644107 |        |        |
| D4ZD04 | 637905 | A6FLW9 | 351016 |        |        |
| C9CZ34 | 644076 | Q1GKH6 | 292414 |        |        |
| C6WAW5 | 446462 | D2V3E3 | 5762   |        |        |
| B7QSN1 | 439497 | A1B5J9 | 318586 |        |        |
| Q0FRV0 | 314265 | A3XDP7 | 314262 |        |        |
| A6FLW8 | 351016 | B6BEW9 | 439496 |        |        |
| A3K518 | 388399 | B9NLJ1 | 467661 |        |        |
| B4BQN3 | 495036 | A3STM1 | 314267 |        |        |
| A4IK78 | 420246 | A3PND5 | 349101 |        |        |
| A3I843 | 388400 | Q6LIA6 | 74109  |        |        |
| A2QIZ4 | 425011 | B9KP22 | 557760 |        |        |
| A3LQ43 | 4924   | Q3IYW2 | 272943 |        |        |
| Q1GKH7 | 292414 | Q1Z6I5 | 314280 |        |        |
| Q6C844 | 4952   | A3S8Q8 | 52598  |        |        |
| A1C5F9 | 5057   | A3VXP5 | 314264 |        |        |

|        |        |        |        |
|--------|--------|--------|--------|
| A1CI66 | 5057   | A3V2U7 | 314232 |
| A1CWN5 | 331117 | Q2CKD5 | 314256 |
| A2QB21 | 425011 | B7QSN0 | 439497 |
| A5E050 | 36914  | A6E4H9 | 391613 |
| A7F6I4 | 665079 | Q0FFN0 | 367336 |
| A8P1II | 240176 | A4WWR4 | 349102 |
| A8PXU8 | 425265 | A9DXX4 | 391624 |
| A9V958 | 81824  | A9HX34 | 391595 |
| B2B555 | 5145   | Q5LNA5 | 89184  |
| B2VUT2 | 426418 | Q16C99 | 375451 |
| B6HV69 | 500485 | A4ESV1 | 388739 |
| B6JXD3 | 402676 | B6AV24 | 314270 |
| B8NIE7 | 332952 | A3SLD2 | 89187  |
| B9WEP0 | 573826 | A4ELZ0 | 391593 |
| C1G452 | 502780 | B7RKP5 | 391589 |
| C1GVZ8 | 502779 | Q28K30 | 290400 |
| C6HIX0 | 544712 | A9FD76 | 383629 |
| C7YTT0 | 660122 | A9GJL6 | 391619 |
| C9SG84 | 526221 | B5K5L8 | 391616 |
| D0CTY4 | 644107 | Q0FRV1 | 314265 |
| D4B1K0 | 663331 | B5IZ49 | 391626 |
| D5GD57 | 39416  | A3K517 | 388399 |
| Q0D1W0 | 341663 | A3JMZ7 | 388401 |
| Q2UNU0 | 5062   | B5I7U4 | 463191 |
| Q5KEA8 | 5207   | Q82M72 | 33903  |
| Q6B170 | 4932   | C9ZBN4 | 680198 |
| Q6BL02 | 4959   | A8M4N3 | 391037 |
| Q96TW2 | 5076   | C6WAW4 | 446462 |
|        |        | D5WN65 | 640511 |
|        |        | C0BMF0 | 487797 |
|        |        | A4CM31 | 313596 |
|        |        | C3YJJ0 | 7739   |
|        |        | C3ZFX2 | 7739   |
|        |        | Q9UDR5 | 9606   |
|        |        | Q9VLX0 | 7227   |
|        |        | A2VCW9 | 10116  |
|        |        | A4D0W4 | 9606   |
|        |        | A8E657 | 9913   |
|        |        | A8XI56 | 6238   |
|        |        | B0W052 | 7176   |
|        |        | B3MV19 | 7217   |
|        |        | B3N6N9 | 7220   |
|        |        | B4G8F0 | 7234   |
|        |        | B4HYA5 | 7238   |
|        |        | B4JA33 | 7222   |
|        |        | B4KGK4 | 7230   |

|        |       |
|--------|-------|
| B4LSS5 | 7244  |
| B4MWK8 | 7260  |
| B4NZG7 | 7245  |
| B4Q5T6 | 7240  |
| C9K2E7 | 44386 |
| D7EHU4 | 7070  |
| O44503 | 6239  |
| Q16FJ9 | 7159  |
| Q29N04 | 46245 |
| Q3UEQ9 | 10090 |
| Q3UWN2 | 10090 |
| Q5I0C2 | 8364  |
| Q5XLU9 | 8022  |
| Q6GN76 | 8355  |
| Q99K67 | 10090 |

| <b>LysX</b>    |             | <b>LysZ</b>    |             | <b>LysY</b>    |             |
|----------------|-------------|----------------|-------------|----------------|-------------|
| <b>UniProt</b> | <b>TXID</b> | <b>UniProt</b> | <b>TXID</b> | <b>UniProt</b> | <b>TXID</b> |
| Q5SH23         | 300852      | Q5SH27         | 300852      | Q5SH26         | 300852      |
| Q72HE6         | 262724      | O50147         | 262724      | O50146         | 262724      |
| O50144         | 274         | B7A8X6         | 498848      | B7A8X5         | 498848      |
| B7A8X4         | 498848      | D7BIA1         | 526227      | D7BIA2         | 526227      |
| D7B9U4         | 526227      | D3PNS4         | 504728      | D3PNS6         | 504728      |
| D3PNS7         | 504728      | C1CUR7         | 546414      | Q1J0J7         | 319795      |
| Q1IZ86         | 319795      | D7CX13         | 649638      | D7CX09         | 649638      |
| C1CVR5         | 546414      | Q9RUG6         | 1299        | C1CUQ6         | 546414      |
| D7CX06         | 649638      | Q1J0K4         | 319795      | Q9RVQ9         | 1299        |
| D1CE82         | 525904      | B8GBE4         | 326427      | B9KZP8         | 309801      |
| D1CE84         | 525904      | A7NPM0         | 383372      | D1CE85         | 525904      |
| Q9RSD1         | 1299        | B9LAR5         | 480224      | D1C6B7         | 479434      |
| B9LI63         | 480224      | A9WIL8         | 324602      | B9LI64         | 480224      |
| A9WD16         | 324602      | D1CE86         | 525904      | A9WD17         | 324602      |
| B8G9T2         | 326427      | A5US68         | 357808      | A5US66         | 357808      |
| D1C955         | 479434      | B9KZP6         | 309801      | D6TDS1         | 485913      |
| A7NPM3         | 383372      | A9B811         | 316274      | B8G9T1         | 326427      |
| A5US65         | 357808      | D1C6B9         | 479434      | A9B810         | 316274      |
| D6TDS2         | 485913      | D6TDS0         | 485913      | A7NPM2         | 383372      |
| A9B809         | 316274      | Q3IMD7         | 348780      | D4GYP0         | 309800      |
| B9L301         | 309801      | Q5UZ51         | 2238        | B5HTW4         | 463191      |
| D3SUS7         | 547559      | C7NP88         | 519442      | D6K9G9         | 645465      |
| D2RUT6         | 543526      | B5GG75         | 465543      | D2RUT5         | 543526      |
| D6K9H0         | 645465      | D3SUS5         | 547559      | B9LTZ2         | 416348      |
| D4GYP1         | 309800      | D2RUT4         | 543526      | D3SUS6         | 547559      |
| C1V898         | 469382      | Q18E31         | 362976      | D1XEU1         | 647653      |
| B9LTZ3         | 416348      | C7NZZ7         | 485914      | Q3IMD8         | 348780      |
| C7NP90         | 519442      | D4GYN9         | 309800      | C7NP89         | 519442      |

|        |        |        |        |        |        |
|--------|--------|--------|--------|--------|--------|
| Q3IMD9 | 348780 | B3T3A9 | 455568 | Q5UZ50 | 2238   |
| D3L663 | 592015 | C1V8A0 | 469382 | Q18E32 | 362976 |
| D3L1N9 | 592015 | A9A1K7 | 436308 | A4YD39 | 399549 |
| D1B8S7 | 525903 | B9LTZ1 | 416348 | Q980X1 | 2287   |
| Q5UZ49 | 2238   | C7QK85 | 479433 | D0KRK2 | 555311 |
| C7NZZ5 | 485914 | D3LIP1 | 592015 | D2PE59 | 425944 |
| B5GG73 | 465543 | A0RWW1 | 46770  | C3NF40 | 419942 |
| Q18E33 | 362976 | C9N7U1 | 591167 | C3N872 | 439386 |
| B1L530 | 374847 | B4XYB4 | 285525 | C3MJ50 | 429572 |
| D2Z854 | 469381 | B5HTW3 | 463191 | Q8ZUA0 | 13773  |
| Q8U482 | 2261   | D2Z856 | 469381 | C4KJ30 | 426118 |
| Q8U0B7 | 2261   | A1RR74 | 384616 | C3MZY9 | 427318 |
| Q5JFW0 | 311400 | A3MT40 | 410359 | C3MYU2 | 427317 |
| A9A1L2 | 436308 | Q2RG64 | 264732 | B5GG74 | 465543 |
| A9A1K5 | 436308 | B1L528 | 374847 | Q9V1I6 | 29292  |
| O59396 | 53953  | A8M8Q8 | 397948 | C7QK84 | 479433 |
| C7QK69 | 479433 | D4L5Y8 | 657321 | Q976J5 | 111955 |
| Q9V1I7 | 29292  | Q4JAQ2 | 2285   | Q8U0B6 | 2261   |
| B3TAF0 | 455603 | Q2NGV4 | 339860 | Q5JFW1 | 311400 |
| B3T4B0 | 455574 | B1YB53 | 444157 | B3T3B0 | 455568 |
| A0RTV2 | 46770  | D5XAD7 | 635013 | C7NZZ6 | 485914 |
| A0RW42 | 46770  | Q8ZU99 | 13773  | O59397 | 53953  |
| B3T3B1 | 455568 | A4YD40 | 399549 | A1RR73 | 384616 |
| C9N7U3 | 591167 | Q8TUX2 | 2320   | Q4JAQ3 | 2285   |
| B4XYC2 | 285525 | C6PAB9 | 580327 | B1YB54 | 444157 |
| B5HTZ2 | 463191 | B9RYI2 | 3988   | C1V899 | 469382 |
| C3MZU3 | 427318 | B9T9H8 | 3988   | A3MT41 | 410359 |
| C3MYT8 | 427317 | D4UJF2 | 246199 | A9A1K6 | 436308 |
| D2PE55 | 425944 | Q5JFW2 | 311400 | A4WJH9 | 340102 |
| C4KJ26 | 426118 | C9KK90 | 500635 | A0RWW0 | 46770  |
| C3N868 | 439386 | O28988 | 2234   | A8M8Q9 | 397948 |
| C3MJ46 | 429572 | A4WJI0 | 340102 | C9N7U2 | 591167 |
| C3NF44 | 419942 | D2RDX4 | 572546 | D2Z855 | 469381 |
| D1XEU0 | 647653 | A6UR56 | 406327 | B1L527 | 374847 |
| A8A8I9 | 453591 | D3S0X1 | 589924 | D3LIP0 | 592015 |
| D0KRK6 | 555311 | O26285 | 187420 | A8AAF8 | 453591 |
| A4YD43 | 399549 | D1B8T2 | 525903 | Q6KYZ5 | 263820 |
| Q976J9 | 111955 | D5RZU8 | 525258 | B4XYB3 | 285525 |
| Q7SI95 | 2287   | D5Q3T6 | 525259 | D0LU59 | 502025 |
| A1RU22 | 384616 | D5EC30 | 547558 | Q096B0 | 378806 |
| A1RTS1 | 384616 | A9A8M9 | 444158 | Q9YBY8 | 56636  |
| A4WHN7 | 340102 | D7ASW6 | 583358 | D1WUS5 | 649189 |
| A4WH93 | 340102 | C7HLW6 | 588857 | D1B8T1 | 525903 |
| A3MVG3 | 410359 | C5RRN9 | 573062 | B1VMJ8 | 455632 |
| A3MSD6 | 410359 | B0K4D4 | 399726 | D1NAS7 | 340101 |
| B1YB81 | 444157 | C5UCF4 | 509193 | D0MH57 | 518766 |

|        |        |        |        |        |        |
|--------|--------|--------|--------|--------|--------|
| B1YAL4 | 444157 | B0KBW1 | 340099 | A5CSI9 | 443906 |
| Q8ZXK1 | 13773  | Q8U0B5 | 2261   | B0RHD0 | 31964  |
| Q8ZY47 | 13773  | C9YMY6 | 645463 | C2CPJ6 | 525268 |
| Q6KYZ8 | 263820 | C9XJQ3 | 645462 |        |        |
| Q4JAP9 | 2285   | Q188A2 | 272563 |        |        |
| A8M8Q6 | 397948 | Q6B8Z0 | 285951 |        |        |
| Q9YBY7 | 56636  | Q46D93 | 269797 |        |        |
| A0B877 | 349307 | A4G0C7 | 402880 |        |        |
| Q8TKX5 | 2214   | Q6M154 | 39152  |        |        |
| Q466V5 | 269797 | D3T5L2 | 580331 |        |        |
| Q6LZC7 | 39152  | D2RIT8 | 591001 |        |        |
| D7DS28 | 456320 | A6VI50 | 426368 |        |        |
| Q8Q0M5 | 2209   | A7VCH7 | 411489 |        |        |
| D1JIG7 | 115547 | Q0AUM4 | 335541 |        |        |
| A6UUH7 | 419665 | Q8PXJ8 | 2209   |        |        |
| A6USK0 | 406327 | Q8THJ9 | 2214   |        |        |
| B3TCF1 | 455612 | C6MF16 | 153948 |        |        |
| C7P665 | 573064 | O59398 | 53953  |        |        |
| D5E7D9 | 547558 | B6C5S6 | 473788 |        |        |
| A6VK09 | 426368 | Q3J6V9 | 323261 |        |        |
| A4FY98 | 402880 | A9KHN3 | 357809 |        |        |
| A9A7Q7 | 444158 | Q97GH8 | 1488   |        |        |
| Q58037 | 2190   | C7IT19 | 589861 |        |        |
| B5HEI5 | 457429 | A8AA51 | 453591 |        |        |
| D5MJV6 | 671143 | Q1GZ15 | 265072 |        |        |
| Q12WH9 | 259564 | B8GTE7 | 396588 |        |        |
| B1VMJ7 | 455632 | B8GLR6 | 396588 |        |        |
| D1WUS6 | 649189 | Q7NR63 | 536    |        |        |
| C9RGE7 | 579137 | Q7NSR5 | 536    |        |        |
| Q1YFX7 | 287752 | C1EFW2 | 296587 |        |        |
| Q4JIT4 | 333425 | A8SYH7 | 411474 |        |        |
| D5C3I2 | 472759 | A6UT97 | 419665 |        |        |
| D7A5F6 | 639283 | C0QYU9 | 565034 |        |        |
| D7E6J7 | 644295 | C4KJ29 | 426118 |        |        |
| D2QWP6 | 530564 | C3N871 | 439386 |        |        |
| Q4JIN4 | 333372 | C3MZY8 | 427318 |        |        |
| D3S0R0 | 589924 | C3MYU1 | 427317 |        |        |
| D5SQ35 | 521674 | C3MJ49 | 429572 |        |        |
| Q1DFE7 | 246197 | D2PE58 | 425944 |        |        |
| Q1D7V4 | 246197 | D2ZMH7 | 521002 |        |        |
| Q88Z73 | 1590   | B9AH57 | 483214 |        |        |
| D5VR43 | 573063 | A5UK52 | 420247 |        |        |
| C0N3H5 | 637616 | C8W633 | 485916 |        |        |
| D6SMD0 | 555779 | D5HH43 | 751585 |        |        |
| D6SMI0 | 555779 | D7E9X1 | 644295 |        |        |
| A2SJ25 | 420662 | Q0ADI4 | 335283 |        |        |



|        |        |        |        |
|--------|--------|--------|--------|
| D3S4E9 | 644281 | Q980X0 | 2287   |
| A7JPP7 | 272629 | D0KRK3 | 555311 |
| A2BIU1 | 415426 | C5RKJ3 | 573061 |
| A9KNJ7 | 357809 | C7N8R2 | 523794 |
| Q4BZD1 | 165597 | C6X9A3 | 582744 |
| Q1ZUU0 | 314292 | D5U6S6 | 526224 |
| Q1ZKN6 | 314292 | D0KWP5 | 555778 |
| Q099S1 | 378806 | C3NF41 | 419942 |
| Q08SZ3 | 378806 | A9BEC0 | 93059  |
| Q65UJ6 | 221988 | B9NA36 | 3694   |
| B1XQE7 | 32049  | B9P734 | 3694   |
| D5CFE9 | 716541 | C5UXM5 | 536233 |
| C9NNL8 | 675814 | A8RJD5 | 411902 |
| D2ZAA9 | 500639 | Q9V1I5 | 29292  |
| Q30PW7 | 326298 | C6WYH2 | 583345 |
| B8KAC1 | 391586 | Q3A9W2 | 246194 |
| B8KB21 | 391586 | A5KJM5 | 411460 |
| Q3JEF7 | 323261 | Q2JHF7 | 321332 |
| B6C344 | 473788 | C4IM51 | 632245 |
| A8AIR5 | 290338 | B1QZ98 | 447214 |
| D5QL58 | 595536 | B2UYI4 | 508767 |
| P45241 | 727    | D3RRI4 | 572477 |
| C9MGR4 | 656912 | D1YZV3 | 304371 |
| C9QMM9 | 675816 | A7VYH2 | 428125 |
| A4C713 | 87626  | D7CJG3 | 643648 |
| A4C7D6 | 87626  | B0TCA8 | 498761 |
| A4CEZ0 | 87626  | B1C853 | 445971 |
| B3GX62 | 537457 | C0WEM3 | 563191 |
| A3MZK2 | 416269 | Q0VT62 | 393595 |
| C6MY82 | 658187 | D3AQH7 | 566550 |
| B7LN16 | 585054 | D1PRJ4 | 411471 |
| B1ZIC6 | 441620 | Q2YA02 | 323848 |
| C9PBD2 | 675811 | A6M1Z8 | 290402 |
| D7DAJ8 | 591019 | C3MF41 | 394    |
| A4NRJ0 | 374933 | D4DPG2 | 546263 |
| B7KXE0 | 440085 | B0CAM3 | 329726 |
| A9W3S5 | 419610 | Q1WLF7 | 382    |
| B4B4R3 | 497965 | Q92SG0 | 382    |
| Q8KMJ4 | 661410 | D7DV65 | 456320 |
| A0Y2F4 | 156578 | Q1XDF8 | 2788   |
| C4F183 | 521005 | P59299 | 173    |
| C5B143 | 272630 | D5C3A9 | 472759 |
| A4NMR8 | 374932 | B9J8D8 | 311403 |
| A5Z789 | 411463 | B7K814 | 65393  |
| A5Z784 | 411463 | D7DMJ3 | 666681 |
| Q3IG57 | 326442 | D1KDM1 | 655186 |

|        |        |        |        |
|--------|--------|--------|--------|
| Q9HTZ2 | 287    | B2IX33 | 63737  |
| Q02EG7 | 208963 | Q2JXF5 | 321327 |
| B7V3U4 | 557722 | D5VSU2 | 573063 |
| A6VDX3 | 381754 | Q1MM66 | 216596 |
| A3LIT0 | 350703 | Q2KD36 | 347834 |
| A3L267 | 350704 | B0MCG0 | 411490 |
| D4BC08 | 500640 | C4FP41 | 546273 |
| C9Y013 | 413502 | Q12ZP8 | 259564 |
| A7H686 | 404589 | A4J169 | 349161 |
| A7HCI8 | 404589 | C6AZ71 | 395491 |
| A7HC70 | 404589 | Q2FTZ8 | 323259 |
| B5FBB1 | 388396 | B3Q031 | 491916 |
| A7MF38 | 290339 | Q31ED4 | 317025 |
| A4N9R9 | 375177 | D1JER2 | 115547 |
| D2TQG7 | 637910 | P69366 | 2786   |
| B0BU89 | 434271 | P69365 | 2787   |
| C4F348 | 521004 | D1AJ75 | 526218 |
| A3DMI7 | 399550 | A5ZVL7 | 411459 |
| A5UEH4 | 374931 | D4LUR6 | 657314 |
| D6DUS5 | 718254 | Q7NEE9 | 33072  |
| C8MFP6 | 553583 | C7RK63 | 522306 |
| D0KB49 | 561231 | C5XRY3 | 4558   |
| A4NFG1 | 374928 | C5YDH0 | 4558   |
| Q9FA40 | 408    | Q976J6 | 111955 |
| D1MX69 | 288    | B0G879 | 411461 |
| A5UCC6 | 374930 | D3A7K9 | 546268 |
| Q9CMJ8 | 747    | B4X0G7 | 236097 |
| Q5E743 | 312309 | Q8R7C0 | 119072 |
| C9MF42 | 656913 | B7R645 | 391606 |
| B3PCD4 | 498211 | B1IIC7 | 477974 |
| A6CF71 | 344747 | B1BZS8 | 428126 |
| Q6R3H8 | 107634 | C9LRW1 | 546271 |
| Q4QKP3 | 281310 | B0SU21 | 456481 |
| Q0G4J6 | 314231 | B0SIF3 | 355278 |
| A1U360 | 351348 | B8GFN4 | 521011 |
| C1M9F6 | 469595 | Q603M3 | 414    |
| B8GEE4 | 521011 | Q606D4 | 414    |
| A5KT07 | 443342 | A4SBC5 | 436017 |
| D4E8J2 | 667129 | B0PD03 | 445972 |
| Q2C0C6 | 121723 | C5EPV7 | 457421 |
| A4W8L7 | 399742 | B9Z8B8 | 279714 |
| A4N0R1 | 374927 | B9Z6H2 | 279714 |
| D3HLC6 | 661367 | B4FSD4 | 4577   |
| D1RJG4 | 638315 | B6U787 | 4577   |
| C6DEP6 | 561230 | B6TEB2 | 4577   |
| C9Q698 | 675810 | C0N8P6 | 637616 |

|        |        |        |        |
|--------|--------|--------|--------|
| Q6D3R5 | 29471  | A6U5K5 | 366394 |
| C6VRW5 | 471854 | C5TNA2 | 596320 |
| Q9KPT1 | 666    | D3E2W9 | 634498 |
| D7HQB5 | 412967 | A8UV02 | 392423 |
| D7HE67 | 345074 | A8V071 | 392423 |
| D0HXJ9 | 675809 | B6FJL5 | 500632 |
| D0H4U1 | 675807 | B2TQ27 | 508765 |
| C6S2V0 | 661513 | D4S8Q5 | 585503 |
| A8ACC7 | 453591 | B8I8A5 | 394503 |
| B9KZP9 | 309801 | B4VRU9 | 118168 |
| C3MQE2 | 429572 | A0NSE3 | 384765 |
| C3MW20 | 427317 | C6PQM1 | 536227 |
| C3N663 | 427318 | C9L6Z0 | 537007 |
| C3NEL9 | 439386 | D4TUK4 | 533247 |
| C3NH24 | 419942 | D4THV1 | 533240 |
| C4KHM6 | 426118 | Q60382 | 2190   |
| D1C6B6 | 479434 | D3S7W9 | 644281 |
| D2PCE1 | 425944 | Q5KSL5 | 39947  |
| Q970U6 | 111955 | Q6H6G1 | 39947  |
| A4YI79 | 399549 | A3A9S7 | 39947  |
| D0KT52 | 555311 | Q7XU28 | 39947  |
| Q4J8E7 | 2285   | C8PVS4 | 553217 |
| Q9UX35 | 2287   | Q949B4 | 4530   |

| <b>LysJ</b>    |             | <b>LysK</b>    |             | <b>dihydrodipicolinate synthase</b> |             |
|----------------|-------------|----------------|-------------|-------------------------------------|-------------|
| <b>UniProt</b> | <b>TXID</b> | <b>UniProt</b> | <b>TXID</b> | <b>UniProt</b>                      | <b>TXID</b> |
| Q5SHH5         | 300852      | Q5SHH3         | 300852      | Q9FVC8                              | 3702        |
| Q93R93         | 262724      | Q8VUS5         | 262724      | Q0WSN6                              | 3702        |
| B7A5Y2         | 498848      | B7A5Y1         | 498848      | Q9LZX6                              | 3702        |
| D7BI15         | 526227      | D3PKC7         | 504728      | D7LCJ3                              | 81972       |
| Q1IYH3         | 319795      | D7BI14         | 526227      | B9S6U4                              | 3988        |
| Q9RW75         | 1299        | D7CX18         | 649638      | B9GPI1                              | 3694        |
| C1CWU6         | 546414      | Q1IYJ8         | 319795      | B9IC12                              | 3694        |
| A9B812         | 316274      | A7NPL3         | 383372      | Q42948                              | 4097        |
| D7CX15         | 649638      | A5UWU3         | 357808      | C6TM29                              | 3847        |
| B9LF89         | 480224      | Q9RUH3         | 1299        | C6TG34                              | 3847        |
| A9WB46         | 324602      | C1CX65         | 546414      | Q42800                              | 3847        |
| D1CE87         | 525904      | B9LBG7         | 480224      | B8LQ02                              | 3332        |
| B8GCW9         | 326427      | A9WJY2         | 324602      | P24846                              | 4565        |
| D6TDR9         | 485913      | B8GCL9         | 326427      | P24847                              | 4565        |
| A5UWU2         | 357808      | B9KZQ0         | 309801      | Q0JEK1                              | 39947       |
| B9KZP5         | 309801      | D1CE83         | 525904      | Q7XM43                              | 39947       |
| A7NPL4         | 383372      | D1C6B5         | 479434      | A3ARP8                              | 39947       |
| D1C6C0         | 479434      | A9B813         | 316274      | Q7XPB5                              | 39947       |
| Q3IMD6         | 348780      | Q8U0B3         | 2261        | Q01HC8                              | 4530        |
| Q976K0         | 111955      | C9N7U0         | 591167      | Q9LWB9                              | 4530        |

|        |        |        |        |         |        |
|--------|--------|--------|--------|---------|--------|
| Q12U07 | 259564 | Q9V1I3 | 29292  | A2XWN2  | 39946  |
| A4YD44 | 399549 | O59402 | 53953  | B8ARJ0  | 39946  |
| Q4JAP8 | 2285   | Q5JFW4 | 311400 | Q1PDD5  | 58934  |
| A9A1K8 | 436308 | D6XAH2 | 463191 | A9SGY8  | 145481 |
| D3S5L1 | 644281 | C1V8A2 | 469382 | A9RR71  | 145481 |
| D7EBQ7 | 644295 | C7QK68 | 479433 | A8I3W3  | 3055   |
| Q8PX16 | 2209   | B4XYB5 | 285525 | A4RX84  | 436017 |
| C7NZZ8 | 485914 | C7NZZ9 | 485914 | C1MLG6  | 564608 |
| C9RFZ2 | 579137 | Q3IMD5 | 348780 | A0XYC9  | 156578 |
| Q0W469 | 351160 | Q18E29 | 362976 | A4C4H7  | 87626  |
| C7NP87 | 519442 | A9A1L3 | 436308 | C6X6Q1  | 582744 |
| A0RWW2 | 46770  | D4GYN7 | 309800 | Q2KQWY6 | 360910 |
| Q7SI94 | 2287   | C8MFP2 | 553583 | D3PAV3  | 639282 |
| D0KRK7 | 555311 | B3T4A9 | 455574 | A1U1A6  | 351348 |
| Q58131 | 2190   | B3TAE9 | 455603 | B5YKK4  | 289376 |
| Q8TUE8 | 2214   | B3TCE9 | 455612 | D0CFC3  | 575584 |
| C4KJ25 | 426118 | Q5UZ53 | 2238   | B7I287  | 480119 |
| C3NF45 | 419942 | B9LTY9 | 416348 | B7GV32  | 557600 |
| D2PE54 | 425944 | D6K9G7 | 645465 | B2I2E1  | 405416 |
| C3N867 | 439386 | B5GG76 | 465543 | B0VPX3  | 509170 |
| C3MYT7 | 427317 | C7NP86 | 519442 | B0VA02  | 509173 |
| C3MJ45 | 429572 | D2RUT2 | 543526 | A3MA68  | 400667 |
| C3MZU2 | 427318 | B5HEI1 | 457429 | D0C463  | 575564 |
| Q1PX83 | 174633 | A0RTV3 | 46770  | Q3ACY3  | 246194 |
| B3T3A8 | 455568 | Q88Z70 | 1590   | Q60B13  | 414    |
| D5VSV8 | 573063 | D3SUS3 | 547559 | C9RDP4  | 579137 |
| Q46E47 | 269797 | D1XET4 | 647653 | D0S542  | 575585 |
| Q5UZ52 | 2238   | D3LIP3 | 592015 | A7VTW0  | 428125 |
| D1YVL2 | 304371 | Q6KYZ9 | 263820 | A7VX17  | 428125 |
| D4GYN8 | 309800 | D2Z858 | 469381 | C4L2D2  | 360911 |
| B9LTZ0 | 416348 | D1B8T4 | 525903 | C8WA08  | 521095 |
| C7P8K0 | 573064 | A8MAC2 | 397948 | C7TFE5  | 568704 |
| Q18E30 | 362976 | B1L532 | 374847 | C2JTM0  | 525361 |
| D5E9X0 | 547558 | Q4JAP7 | 2285   | Q76E52  | 17     |
| A0B5Y4 | 349307 | Q9YBY3 | 56636  | D6JW95  | 575565 |
| D3FVI6 | 398511 | A8AA94 | 453591 | C1DQP7  | 322710 |
| Q8R7C1 | 119072 | Q980W5 | 2287   | D4EGM7  | 694569 |
| B7R646 | 391606 | D0KRK8 | 555311 | C9R4Y0  | 668336 |
| A9AAK5 | 444158 | A4WJ85 | 340102 | B5QQ65  | 486408 |
| D3SUS4 | 547559 | Q8ZUG2 | 13773  | Q82SD7  | 915    |
| D2RUT3 | 543526 | Q976K1 | 111955 | C7T8R1  | 568703 |
| O30156 | 2234   | C3NF46 | 419942 | C7NIU8  | 478801 |
| O27392 | 187420 | C3N866 | 439386 | Q2BHH0  | 207954 |
| Q9K8V5 | 86665  | C3MYT6 | 427317 | Q2Y8S8  | 323848 |
| A8MCU6 | 397948 | C3MJ44 | 429572 | D3RNG1  | 572477 |
| A6UPB2 | 406327 | C3MZU1 | 427318 | D5R626  | 642492 |

|        |        |        |        |        |        |
|--------|--------|--------|--------|--------|--------|
| A6VG46 | 426368 | D2PE53 | 425944 | D5R2T4 | 642492 |
| B5YJU8 | 289376 | C4KJ24 | 426118 | D3L1V3 | 592015 |
| C1V8A1 | 469382 | A4YD45 | 399549 | Q88NH2 | 160488 |
| A4FX68 | 402880 | A1RUC2 | 384616 | C6BSH4 | 526222 |
| A9VG69 | 315730 | B1YBH4 | 444157 | A5VZW8 | 351746 |
| D6UNY1 | 682795 | Q0W5T9 | 351160 | Q1I6H5 | 384676 |
| Q67KD4 | 2734   | B5E9K5 | 404380 | C5NUT8 | 546270 |
| A6UUQ2 | 419665 | A3MVL6 | 410359 | D0T7Y7 | 575589 |
| A3HVZ0 | 388413 | C6E2X3 | 443144 | C6RJF3 | 596318 |
| C9RY11 | 544556 | C6MVA5 | 443143 | C6LFD1 | 478749 |
| C3J1U5 | 550542 | D5WWB0 | 562970 | C6LB88 | 478749 |
| A7GSF1 | 315749 | D5WQV4 | 562970 | A8RZS7 | 411902 |
| Q731G6 | 222523 | C8NVI2 | 585529 | A8RUZ7 | 411902 |
| B4BII4 | 495036 | A4QD73 | 340322 | A3CVI7 | 368407 |
| A4IL49 | 420246 | Q59284 | 1718   | B0KSY3 | 76869  |
| Q8ZV07 | 13773  | D0WNP3 | 649743 | Q3KJ2  | 205922 |
| A4WKP7 | 340102 | C0VT95 | 548477 | A9DKW4 | 314608 |
| A6TTJ0 | 293826 | D1Z2T1 | 304371 | C3KED4 | 216595 |
| Q6LY90 | 39152  | A5G9L2 | 351605 | C6MBX7 | 153948 |
| B5V757 | 451708 | C2GIV4 | 548478 | A7B7M3 | 411470 |
| D7DIS9 | 691437 | C0WFI4 | 525260 | Q8F132 | 173    |
| A3MSV3 | 410359 | D5NZC4 | 649754 | A3VB56 | 314271 |
| D2C831 | 590168 | D0MJ50 | 518766 | D5CLS3 | 580332 |
| O66442 | 63363  | Q093A1 | 378806 | D1U3I3 | 643562 |
| Q4MMY1 | 269801 | Q09E40 | 378806 | A3IT21 | 391612 |
| A8ZW63 | 96561  | D6Z638 | 589865 | D3SNF3 | 638303 |
| A1RVT8 | 384616 | Q1D263 | 246197 | D7HxD8 | 693985 |
| D7DTP3 | 456320 | C0D6K6 | 518636 | D7I2D1 | 693985 |
| C9R9D7 | 429009 | C0D7V9 | 518636 | D3DIN3 | 608538 |
| C5CHX0 | 521045 | B1MLJ7 | 561007 | B3PC19 | 498211 |
| C7ITJ0 | 589861 | A5DDR6 | 4929   | D4ZJN9 | 637905 |
| B6FJL4 | 500632 | D7HUX0 | 693985 | D2LZH9 | 649639 |
| D7AM62 | 663917 | D7I6V5 | 693985 | D2LSB9 | 649639 |
| C7HLW7 | 588857 | D7HVL8 | 693985 | D4L875 | 657321 |
| C5RRP0 | 573062 | Q2LXL7 | 56780  | C4FJZ6 | 432331 |
| B0K4D5 | 399726 | Q4ZZU6 | 205918 | Q48LD5 | 264730 |
| D2ZNL7 | 521002 | Q500E9 | 205918 | D0SP20 | 575587 |
| Q74GU3 | 35554  | Q4ZYE3 | 205918 | A1WZ50 | 349124 |
| B1Y8L7 | 444157 |        |        | Q1WU86 | 362948 |
| C0GH80 | 555088 |        |        | C2EEY0 | 525364 |
| Q2LT99 | 56780  |        |        | B0PB24 | 445972 |
| C5UCF3 | 509193 |        |        | D7LRV3 | 81972  |
| B0KBW2 | 340099 |        |        | C5Z796 | 4558   |
| Q97GH9 | 1488   |        |        | C5YEF4 | 4558   |
| B9IXC6 | 361100 |        |        | B4F8D4 | 4577   |
| A5UMZ5 | 420247 |        |        | P26259 | 4577   |

|        |        |        |        |
|--------|--------|--------|--------|
| Q5L1V2 | 1462   | Q39535 | 4505   |
| D4YA57 | 634956 | Q019N6 | 70448  |
| C6QLP0 | 581103 | Q3IC52 | 326442 |
| B9AG10 | 483214 | Q47XX2 | 167879 |
| Q9X2A5 | 2336   | A3WKW6 | 314276 |
| B7REP3 | 443254 | Q3SJU8 | 292415 |
| A5ILL6 | 390874 | D3G0R4 | 398511 |
| Q3A9W3 | 246194 | D3FTZ0 | 398511 |
| B7HNP6 | 405534 | Q5QU03 | 135577 |
| Q8U0B4 | 2261   | D4XGH7 | 742159 |
| B5YAL6 | 309799 | A8U9V9 | 333990 |
| A3CWS7 | 368407 | B4BIY4 | 495036 |
| D2RDX8 | 572546 | B4BN30 | 495036 |
| A5KJM6 | 411460 | A4IMF1 | 420246 |
| B5USS9 | 405533 | A4ISN1 | 420246 |
| Q2NI52 | 339860 | C9S0E0 | 544556 |
| Q6GKC1 | 282458 | C9RV39 | 544556 |
| Q6GID1 | 282458 | C3J5C2 | 550542 |
| D6SE09 | 548470 | C3J5R4 | 550542 |
| D6SFP0 | 548470 | D7CZH8 | 691437 |
| D6LUB8 | 585154 | D7D0J3 | 691437 |
| D6LW47 | 585154 | A9HXM3 | 340100 |
| D6J403 | 585157 | D4Y4Q2 | 634956 |
| D6IYV1 | 585157 | D4YCI7 | 634956 |
| D6HDI3 | 585144 | C6QMF0 | 581103 |
| D6HFF6 | 585144 | C6QUA5 | 581103 |
| D6H2X8 | 585156 | Q2B0K6 | 313627 |
| D6GYE5 | 585156 | D2Z760 | 469381 |
| D2UW78 | 585147 | B4ADT3 | 536229 |
| D2UQQ3 | 585147 | C6WYD7 | 583345 |
| D2GN00 | 585150 | A8FDE6 | 315750 |
| D2GP27 | 585150 | A8FHB5 | 315750 |
| D2GIL4 | 585148 | A4G724 | 204773 |
| D2GES0 | 585148 | B2UMF2 | 349741 |
| D2G691 | 585161 | C6NYU0 | 637389 |
| D2G8B2 | 585161 | Q7W884 | 519    |
| D2G595 | 585160 | Q7VXZ8 | 520    |
| D2FZW4 | 585160 | D3SDV5 | 396595 |
| D2FRZ7 | 585159 | Q5MZT3 | 269084 |
| D2FTY2 | 585159 | Q31M42 | 1140   |
| D2FHM8 | 585151 | C5V6T0 | 395494 |
| D2FBQ1 | 585151 | Q7WLT9 | 518    |
| D2F3K4 | 585149 | C5D9E4 | 471223 |
| D2F572 | 585149 | D7DM41 | 666681 |
| D1GM11 | 663951 | Q93RJ8 | 406    |
| D1GRD1 | 663951 | B2JIV8 | 391038 |

|        |        |        |        |
|--------|--------|--------|--------|
| C8ALT2 | 585158 | A6EWS7 | 443152 |
| C8AQJ3 | 585158 | B1XL16 | 32049  |
| C8AG34 | 585153 | B3DY26 | 481448 |
| C8AI51 | 585153 | A5GD89 | 351605 |
| C8A7K3 | 585146 | Q5L0H4 | 1462   |
| C8AAH7 | 585146 | Q5KVG9 | 1462   |
| C8A170 | 585145 | B0JL91 | 449447 |
| C8A308 | 585145 | A7Z4U8 | 326423 |
| C7ZTI9 | 585143 | Q9KC32 | 86665  |
| C7ZVH0 | 585143 | Q9KA91 | 86665  |
| C2G705 | 548473 | Q2SCM7 | 349521 |
| C2G977 | 548473 | Q2S9K4 | 349521 |
| C3JQR6 | 596309 | C7RSI3 | 522306 |
| D7ASW5 | 583358 | Q0AI27 | 335283 |
| D3T5L1 | 580331 | Q1H2N2 | 265072 |
| D2N3P0 | 523796 | B8Y632 | 1471   |
| D2N5R9 | 523796 | D6Z6B7 | 589865 |
| C1A054 | 234621 | D4FWS6 | 645657 |
| C5D767 | 471223 | B7GG61 | 491915 |
| A4J170 | 349161 | A6SXH5 | 375286 |
| D2PM78 | 479435 | D5MZ25 | 703612 |
| C5QEC1 | 548475 | D0WHJ0 | 649764 |
| C5QHR0 | 548475 | A0ZER9 | 313624 |
| C4Z4C5 | 515620 | Q04796 | 1423   |
| Q8NYM5 | 196620 | C4G2G1 | 592010 |
| P60299 | 196620 | A1ATI8 | 338966 |
| Q6GCU1 | 282459 | B0SL58 | 456481 |
| Q6GAW9 | 282459 | B0SCT0 | 355278 |
| Q5HJI8 | 93062  | Q8DJK4 | 197221 |
| Q5HHC8 | 93062  | A1US27 | 360095 |
| Q2GIH3 | 93061  | B9Z1L2 | 279714 |
| Q2FZU6 | 93061  | C5CHX9 | 521045 |
| D4U5U0 | 553590 | Q2SXB3 | 271848 |
| D4U8Z6 | 553590 | Q65JG7 | 279010 |
| D1Q8E3 | 553594 | Q65F34 | 279010 |
| D1Q9J1 | 553594 | Q65EJ2 | 279010 |
| D1P0J6 | 500637 | A6CQ70 | 161544 |
| C8KQE4 | 455227 | D3BWB3 | 653733 |
| C8KUA7 | 455227 | A6DKZ4 | 313628 |
| C8KIW3 | 452948 | Q21HE7 | 203122 |
| C8KLW2 | 452948 | B1YSQ0 | 398577 |
| C5Q443 | 548474 | B1Z3T9 | 398577 |
| C5PY84 | 548474 | B1TEF9 | 396597 |
| D2UIW2 | 585155 | B1FEF0 | 396596 |
| D2UKS2 | 585155 | Q8YQY1 | 103690 |
| D2FIN0 | 585152 | D5W928 | 640511 |

|        |        |        |        |
|--------|--------|--------|--------|
| D2FKI0 | 585152 | C7QW46 | 395962 |
| D6UEF0 | 762962 | B7JW78 | 41431  |
| D6UBX9 | 762962 | B1JDB7 | 390235 |
| A8Z0F0 | 451516 | Q0VRH4 | 393595 |
| A8Z063 | 451516 | A4JFX3 | 269482 |
| D1AJ76 | 526218 | D1MH64 | 208964 |
| C6D4U8 | 324057 | B6BWH8 | 314607 |
| C6CWH2 | 324057 | B5WST8 | 516466 |
| D2LY46 | 649639 | Q9I4W3 | 287    |
| Q07907 | 1422   | Q02IH5 | 208963 |
| B8GIB1 | 521011 | B7UXT3 | 557722 |
| C8LB01 | 553567 | A3LMP3 | 350703 |
| C8LCF5 | 553567 | A3L5Q8 | 350704 |
| Q635F3 | 288681 | A8YMD4 | 267872 |
| B8E0N6 | 515635 | Q13X19 | 266265 |
| B7JLY4 | 405535 | D3HPZ3 | 661367 |
| Q2RG65 | 264732 | D1RH55 | 638315 |
| B3ZVK7 | 451709 | Q0A5S1 | 187272 |
| C6PAB8 | 580327 | B9C7S5 | 513053 |
| A0RIC9 | 412694 | B9BZY0 | 513052 |
| D5WRY7 | 562970 | B9BE04 | 513051 |
| C5N161 | 450394 | A9AHL4 | 395019 |
| C5N437 | 450394 | Q0BDT5 | 339670 |
| D4FUZ0 | 645657 | C6AK98 | 634176 |
| D5SR97 | 521674 | Q1ZCA3 | 314282 |
| Q3Z729 | 243164 | Q67P59 | 2734   |
| B7HB01 | 405532 | A6V9K4 | 381754 |
| C0BVS9 | 553973 | Q3M723 | 240292 |
| C0C3U3 | 553973 | A2VX57 | 350702 |
| A6QDG9 | 426430 | D5EC78 | 572547 |
| A6QFG7 | 426430 | Q1BHQ8 | 331271 |
| B1LAN9 | 126740 | Q1BVB3 | 331271 |
| B3Z662 | 451707 | A0K8L9 | 331272 |
| B3YVY5 | 405917 | A0KCW1 | 331272 |
| A9BIA0 | 403833 | B1JUX4 | 406425 |
| P60296 | 158879 | B1K9V2 | 406425 |
| P60298 | 158879 | C5EGS9 | 457421 |
| P60295 | 158878 | C5EU98 | 457421 |
| P60297 | 158878 | D0WAK2 | 546265 |
| D6T5F7 | 553577 | D3UN22 | 683837 |
| D6T6S4 | 553577 | Q1QTP6 | 290398 |
| D4UCC9 | 553580 | A6D078 | 391591 |
| D4UDF7 | 553580 | D1DVH8 | 528355 |
| D3ES13 | 703339 | D1D8X1 | 528352 |
| D3EV50 | 703339 | D6DIN8 | 717608 |
| D1QYH8 | 553574 | D4CA91 | 411486 |



|        |        |        |        |
|--------|--------|--------|--------|
| D1R0B9 | 553574 | C4KQI4 | 536230 |
| D1QEC3 | 553601 | C6SF52 | 663926 |
| D1QG19 | 553601 | A1KTJ9 | 272831 |
| D0K7U2 | 681288 | Q63SR2 | 28450  |
| D0K3M5 | 681288 | Q62J21 | 13373  |
| C8N122 | 553596 | Q3JQR8 | 320372 |
| C8N4S9 | 553596 | C6TTP0 | 320371 |
| C8MTK6 | 553592 | C5ZJN1 | 357347 |
| C8MRE0 | 553592 | C5NFJ2 | 436115 |
| C8MMH3 | 553588 | C4AR21 | 320390 |
| C8MPL1 | 553588 | B7CLW6 | 557724 |
| C8M968 | 553581 | B2H9U2 | 331109 |
| C8M6F7 | 553581 | B1HDV3 | 320374 |
| C8M1I2 | 553573 | A9K9G1 | 412021 |
| C8LWX6 | 553573 | A8KVU3 | 331978 |
| C8LUB4 | 553571 | A8EC25 | 360118 |
| C8LUV1 | 553571 | A5XYN5 | 334803 |
| C8LHV6 | 553568 | A5XH85 | 334802 |
| C8LM31 | 553568 | A5TJS9 | 370895 |
| C8L756 | 553565 | A4LDD6 | 425067 |
| C8L6I0 | 553565 | A3NX01 | 357348 |
| A7WXH6 | 418127 | A3NB70 | 320373 |
| A7X0H0 | 418127 | A3ML64 | 320389 |
| A6TXW9 | 359787 | A2SAV9 | 412022 |
| A6U064 | 359787 | A1V5I9 | 320388 |
| A5IP54 | 359786 | Q72AX2 | 882    |
| A5IRD5 | 359786 | C5TVE0 | 573059 |
| O59401 | 53953  | A1VCZ9 | 391774 |
| Q81M98 | 1392   | C4GKY1 | 629741 |
| C8MFZ0 | 553583 | Q1N0S5 | 207949 |
| C8MG49 | 553583 | Q1MPX7 | 363253 |
| C3P7R5 | 592021 | B4W098 | 118168 |
| C3LJQ6 | 568206 | B4WY53 | 236097 |
| B3J2X8 | 405536 | A2W938 | 350701 |
| B1US03 | 486622 | Q473F1 | 264198 |
| B1GIN4 | 486620 | P0A6L3 | 623    |
| B1EWQ2 | 486623 | D2AGS4 | 591020 |
| B0QH41 | 486621 | C9QPU6 | 536056 |
| B0Q342 | 486619 | C8UE47 | 585396 |
| B0ASS2 | 486624 | C8TVH4 | 573235 |
| Q4HNL7 | 306264 | C4ZX53 | 595496 |
| D5TWX0 | 714359 | B7M7I1 | 585034 |
| P36839 | 1423   | B1XAF0 | 316385 |
| Q2YUZ5 | 273036 | B1IW11 | 481805 |
| Q2YWS9 | 273036 | D1E285 | 528358 |
| C1ER03 | 572264 | C9RB84 | 429009 |

|        |        |
|--------|--------|
| C6M311 | 547045 |
| A5GDA2 | 351605 |
| Q0SI55 | 101510 |
| A3TLW8 | 313589 |
| A4T9W7 | 350054 |
| D4LZ95 | 657313 |
| D0KB91 | 561231 |
| A8RJD7 | 411902 |
| B7IWP3 | 405531 |
| Q3EYI4 | 339854 |
| Q818W2 | 226900 |
| A8AB22 | 453591 |
| B1L531 | 374847 |
| Q5JFW3 | 311400 |
| Q6KYZ7 | 263820 |
| Q9V1I4 | 29292  |
| Q9YBY6 | 56636  |

|        |        |
|--------|--------|
| D0W0Y0 | 546262 |
| D1DIR0 | 528354 |
| C1HXA4 | 528345 |
| C6S6J8 | 662598 |
| D1E8J7 | 528359 |
| D1D5D3 | 528346 |
| C6CC66 | 579405 |
| B9K865 | 309803 |
| Q0KCC6 | 381666 |
| B4RL41 | 521006 |
| B2IT87 | 63737  |
| A0AIN8 | 386043 |
| A0AX47 | 331272 |
| A0AZP9 | 331272 |
| A0B3X0 | 331272 |
| A0B4G1 | 331272 |
| A0B7E1 | 349307 |
| A0JRB5 | 290399 |
| A0JTV2 | 290399 |
| A0JUX6 | 290399 |
| A0KB17 | 331272 |
| A0KCE3 | 331272 |
| A0KCT3 | 331272 |
| A0KGP3 | 380703 |
| A0KPP8 | 380703 |
| A0KVS0 | 94122  |
| A0LDB5 | 156889 |
| A0LEA7 | 335543 |
| A0LV15 | 351607 |
| A0LZ30 | 411154 |
| A0PPF2 | 362242 |
| A0PQH1 | 362242 |
| A0PZM3 | 386415 |
| A0Q8L5 | 401614 |
| A0QD34 | 243243 |
| A0QI95 | 243243 |
| A0QIT3 | 243243 |
| A0QQU1 | 246196 |
| A0QRL2 | 246196 |
| A0QVT1 | 246196 |
| A0RF35 | 412694 |
| A0RHH0 | 412694 |
| A0RP26 | 360106 |
| A0RPU1 | 360106 |
| A1A2Z5 | 367928 |
| A1A8U2 | 405955 |

|        |        |
|--------|--------|
| A1ADY3 | 405955 |
| A1AGZ7 | 405955 |
| A1AVV3 | 413404 |
| A1AZX2 | 318586 |
| A1B7K1 | 318586 |
| A1BBC0 | 318586 |
| A1BBN3 | 318586 |
| A1BBP2 | 318586 |
| A1BE04 | 290317 |
| A1JL07 | 393305 |
| A1K4F8 | 62928  |
| A1KM94 | 410289 |
| A1R311 | 290340 |
| A1R3Q3 | 290340 |
| A1R540 | 290340 |
| A1RBM7 | 290340 |
| A1RKF2 | 351745 |
| A1RRA5 | 384616 |
| A1SON5 | 368408 |
| A1S0T1 | 368408 |
| A1S5T2 | 326297 |
| A1S6V7 | 326297 |
| A1SCP8 | 196162 |
| A1SCU6 | 196162 |
| A1SJ35 | 196162 |
| A1SVX2 | 357804 |
| A1T2A0 | 350058 |
| A1T2K0 | 350058 |
| A1T7Q1 | 350058 |
| A1TLJ6 | 397945 |
| A1TLU0 | 397945 |
| A1TLZ6 | 397945 |
| A1TPD7 | 397945 |
| A1UDL8 | 189918 |
| A1UEV2 | 189918 |
| A1UG95 | 189918 |
| A1V243 | 320388 |
| A1VLI3 | 365044 |
| A1VSV6 | 365044 |
| A1VZF4 | 354242 |
| A1W4S3 | 232721 |
| A1WFU7 | 391735 |
| A1WGR5 | 391735 |
| A1WH64 | 391735 |
| A1WKF7 | 391735 |
| A1WLE2 | 391735 |

|        |        |
|--------|--------|
| A1WLH4 | 391735 |
| A1WNQ3 | 391735 |
| A1WQB1 | 391735 |
| A1WRX6 | 391735 |
| A2BTN4 | 146891 |
| A2BZ39 | 167542 |
| A2C5B7 | 167555 |
| A2C5R9 | 59922  |
| A2QW51 | 425011 |
| A2RJL6 | 416870 |
| A2S216 | 412022 |
| A2S4J0 | 412022 |
| A2SIX7 | 420662 |
| A2SQU8 | 410358 |
| A3CN43 | 388919 |
| A3D5N2 | 325240 |
| A3DE17 | 203119 |
| A3LZU9 | 4924   |
| A3M186 | 400667 |
| A3M354 | 400667 |
| A3M4A6 | 400667 |
| A3MCU2 | 320389 |
| A3MHW8 | 320389 |
| A3MT18 | 410359 |
| A3N0Q9 | 416269 |
| A3N4Z9 | 320373 |
| A3N6S9 | 320373 |
| A3NGV3 | 320373 |
| A3NQP4 | 357348 |
| A3NSG6 | 357348 |
| A3P2F4 | 357348 |
| A3PFE1 | 167546 |
| A3PMS8 | 349101 |
| A3PX37 | 164757 |
| A3PYB2 | 164757 |
| A3PZU7 | 164757 |
| A3QE16 | 323850 |
| A3QFI0 | 323850 |
| A3U8W0 | 216432 |
| A4CLV4 | 313596 |
| A4CNW0 | 313596 |
| A4F953 | 405948 |
| A4FA73 | 405948 |
| A4FCR4 | 405948 |
| A4FEQ1 | 405948 |
| A4FIJ8 | 405948 |

|        |        |
|--------|--------|
| A4FK27 | 405948 |
| A4FM07 | 405948 |
| A4FYQ3 | 402880 |
| A4IPG7 | 420246 |
| A4J5V5 | 349161 |
| A4JDT0 | 269482 |
| A4JIC5 | 269482 |
| A4JT68 | 269482 |
| A4QEX8 | 340322 |
| A4QH46 | 340322 |
| A4SG05 | 290318 |
| A4SIE4 | 382245 |
| A4SR49 | 382245 |
| A4SW25 | 312153 |
| A4SX51 | 312153 |
| A4T3J4 | 350054 |
| A4TCJ3 | 350054 |
| A4TDQ0 | 350054 |
| A4TMN2 | 386656 |
| A4UCL2 | 148305 |
| A4VN86 | 379731 |
| A4VU96 | 391295 |
| A4W0I7 | 391296 |
| A4W612 | 399742 |
| A4WD58 | 399742 |
| A4WJK5 | 340102 |
| A4WNS1 | 349102 |
| A4WU69 | 349102 |
| A4X4Q6 | 369723 |
| A4XDX9 | 279238 |
| A4XJU0 | 351627 |
| A4XSW1 | 399739 |
| A4Y644 | 319224 |
| A4YIF1 | 399549 |
| A4YMT9 | 114615 |
| A4YN22 | 114615 |
| A4YP59 | 114615 |
| A4YVY2 | 114615 |
| A4YWD9 | 114615 |
| A5CCM7 | 357244 |
| A5CP49 | 443906 |
| A5CSM7 | 443906 |
| A5CXB6 | 412965 |
| A5D2Q5 | 370438 |
| A5DPD9 | 4929   |
| A5EB71 | 288000 |

|        |        |
|--------|--------|
| A5EDS6 | 288000 |
| A5EKM8 | 288000 |
| A5ELG2 | 288000 |
| A5EQ17 | 288000 |
| A5ER01 | 288000 |
| A5ERA1 | 288000 |
| A5EXM4 | 246195 |
| A5FE82 | 376686 |
| A5FQT5 | 216389 |
| A5FUZ2 | 349163 |
| A5FZS7 | 349163 |
| A5G1C8 | 349163 |
| A5G247 | 349163 |
| A5GHT4 | 32051  |
| A5GQ13 | 316278 |
| A5I6N2 | 441771 |
| A5IEB3 | 400673 |
| A5IM62 | 390874 |
| A5ISS7 | 359786 |
| A5N263 | 431943 |
| A5U6A6 | 419947 |
| A5UAN5 | 374930 |
| A5UG62 | 374931 |
| A5ULF8 | 420247 |
| A5UZA6 | 357808 |
| A5V3L9 | 392499 |
| A5V6L4 | 392499 |
| A5VJ58 | 557436 |
| A5VPI5 | 444178 |
| A5VTX7 | 444178 |
| A5VU88 | 444178 |
| A5VZY5 | 351746 |
| A5W2B9 | 351746 |
| A5W6S0 | 351746 |
| A5WB90 | 351746 |
| A5WHC3 | 349106 |
| A5WR04 | 336982 |
| A6H0M8 | 402612 |
| A6L420 | 435590 |
| A6L5G7 | 435590 |
| A6LA57 | 435591 |
| A6LP58 | 391009 |
| A6LUD7 | 290402 |
| A6M0V8 | 290402 |
| A6M2Q3 | 290402 |
| A6M3G3 | 290402 |

|        |        |
|--------|--------|
| A6Q2V4 | 387092 |
| A6Q8F8 | 387093 |
| A6QGU6 | 426430 |
| A6SYZ5 | 375286 |
| A6TB61 | 272620 |
| A6TCA1 | 272620 |
| A6TJU6 | 293826 |
| A6TT17 | 293826 |
| A6U1L6 | 359787 |
| A6U799 | 366394 |
| A6UFH8 | 366394 |
| A6UGA5 | 366394 |
| A6UGL7 | 366394 |
| A6UH42 | 366394 |
| A6UKQ2 | 366394 |
| A6US71 | 406327 |
| A6UVG7 | 419665 |
| A6UY20 | 381754 |
| A6V8V7 | 381754 |
| A6VJM9 | 426368 |
| A6VKA2 | 339671 |
| A6VQQ5 | 339671 |
| A6VRB6 | 400668 |
| A6VX86 | 400668 |
| A6VYR7 | 400668 |
| A6VZF5 | 400668 |
| A6W3Q5 | 400668 |
| A6W828 | 266940 |
| A6W9L0 | 266940 |
| A6WPI6 | 402882 |
| A6WVT6 | 439375 |
| A6X2A0 | 439375 |
| A6X302 | 439375 |
| A6X446 | 439375 |
| A6X488 | 439375 |
| A6X799 | 439375 |
| A7FG49 | 349747 |
| A7FYA1 | 441770 |
| A7GI19 | 441772 |
| A7GMD7 | 315749 |
| A7GRC9 | 315749 |
| A7GYB0 | 360105 |
| A7H443 | 360109 |
| A7H4Q4 | 360109 |
| A7H773 | 404589 |
| A7HJ56 | 381764 |

|        |        |
|--------|--------|
| A7HX36 | 402881 |
| A7I0Y0 | 360107 |
| A7I853 | 456442 |
| A7IE29 | 78245  |
| A7IIB6 | 78245  |
| A7IM10 | 78245  |
| A7K0D0 | 150340 |
| A7MP70 | 290339 |
| A7MRG1 | 290339 |
| A7MY41 | 338187 |
| A7NRX2 | 383372 |
| A7X271 | 418127 |
| A7Z1T0 | 326423 |
| A7ZDQ5 | 360104 |
| A7ZPS4 | 331111 |
| A8A2X1 | 331112 |
| A8ADA9 | 290338 |
| A8AL19 | 290338 |
| A8ARR9 | 290338 |
| A8ET60 | 367737 |
| A8EYZ4 | 293613 |
| A8F1K3 | 416276 |
| A8F364 | 416591 |
| A8F565 | 416591 |
| A8F9S2 | 315750 |
| A8FLL9 | 407148 |
| A8FU50 | 425104 |
| A8FW16 | 425104 |
| A8G7F8 | 93060  |
| A8G9M3 | 399741 |
| A8GCV1 | 399741 |
| A8GDY3 | 399741 |
| A8GHL7 | 399741 |
| A8GNF1 | 293614 |
| A8GS25 | 392021 |
| A8GWS1 | 391896 |
| A8H343 | 398579 |
| A8H415 | 398579 |
| A8I0D2 | 438753 |
| A8I8D6 | 438753 |
| A8I8N7 | 438753 |
| A8I8Q6 | 438753 |
| A8IA87 | 438753 |
| A8ICX7 | 438753 |
| A8IH60 | 438753 |
| A8IQ17 | 438753 |



|        |        |
|--------|--------|
| A8L6H1 | 298653 |
| A8LKQ5 | 398580 |
| A8LS87 | 398580 |
| A8M766 | 391037 |
| A8MDB1 | 397948 |
| A8MF40 | 350688 |
| A8YUT3 | 405566 |
| A8Z3X3 | 451516 |
| A8Z624 | 444179 |
| A8ZX91 | 96561  |
| A9A656 | 444158 |
| A9AK76 | 395019 |
| A9AQW8 | 395019 |
| A9ASX4 | 395019 |
| A9AZJ7 | 316274 |
| A9BD97 | 93059  |
| A9BHR8 | 403833 |
| A9BMR7 | 398578 |
| A9BN23 | 398578 |
| A9BNE7 | 398578 |
| A9BYA8 | 398578 |
| A9BZS2 | 398578 |
| A9CFV4 | 176299 |
| A9CGZ4 | 176299 |
| A9CHR2 | 176299 |
| A9CL94 | 176299 |
| A9CL97 | 176299 |
| A9FHA5 | 448385 |
| A9HIW2 | 272568 |
| A9HQ09 | 272568 |
| A9I9W9 | 340100 |
| A9IDS5 | 340100 |
| A9IHG0 | 340100 |
| A9IRK3 | 382640 |
| A9KFS0 | 434922 |
| A9KHY6 | 357809 |
| A9L573 | 399599 |
| A9M4C8 | 374833 |
| A9MA21 | 483179 |
| A9MDZ3 | 483179 |
| A9MEF3 | 483179 |
| A9MTU8 | 272994 |
| A9N2Z3 | 272994 |
| A9NDT3 | 360115 |
| A9NGC2 | 441768 |
| A9R2G8 | 349746 |

|        |        |
|--------|--------|
| A9VIH7 | 315730 |
| A9VS41 | 315730 |
| A9VYY6 | 419610 |
| A9W0K2 | 419610 |
| A9WE23 | 324602 |
| A9WN30 | 288705 |
| A9WNM3 | 288705 |
| A9WP00 | 288705 |
| A9WQ22 | 288705 |
| A9WXU1 | 470137 |
| A9WY94 | 470137 |
| B0B7T0 | 471472 |
| B0BBZ5 | 471473 |
| B0BPI4 | 434271 |
| B0BXJ1 | 452659 |
| B0C142 | 329726 |
| B0CKX2 | 470137 |
| B0K4I3 | 399726 |
| B0KAL7 | 340099 |
| B0KG52 | 76869  |
| B0KHK3 | 76869  |
| B0KR34 | 76869  |
| B0KSR4 | 76869  |
| B0KST8 | 76869  |
| B0RGX9 | 31964  |
| B0RHT4 | 31964  |
| B0RRM1 | 509169 |
| B0RTW6 | 509169 |
| B0T1M4 | 366602 |
| B0THT2 | 498761 |
| B0TK92 | 458817 |
| B0TVJ5 | 458817 |
| B0TWJ4 | 484022 |
| B0U4J6 | 405440 |
| B0U7H2 | 426117 |
| B0U9P8 | 426117 |
| B0UPL4 | 426117 |
| B0UQL9 | 426117 |
| B0UVZ8 | 228400 |
| B0V931 | 509173 |
| B0VB24 | 509173 |
| B0VCE3 | 509173 |
| B1GYN1 | 471821 |
| B1HR20 | 444177 |
| B1HSZ5 | 444177 |
| B1I383 | 477974 |

|        |        |
|--------|--------|
| B1IBH4 | 487214 |
| B1IMW8 | 498213 |
| B1JSG5 | 502800 |
| B1JZR4 | 406425 |
| B1K2U3 | 406425 |
| B1K8Y4 | 406425 |
| B1K9G9 | 406425 |
| B1KAV7 | 406425 |
| B1KBX4 | 406425 |
| B1KCA6 | 406425 |
| B1KDR2 | 392500 |
| B1KJ77 | 392500 |
| B1LOV1 | 498214 |
| B1L3S1 | 374847 |
| B1L3T8 | 374847 |
| B1LBR1 | 126740 |
| B1LNC8 | 439855 |
| B1LT14 | 426355 |
| B1LTD9 | 426355 |
| B1LTL8 | 426355 |
| B1M0Q9 | 426355 |
| B1M5D2 | 426355 |
| B1MD41 | 561007 |
| B1MJI1 | 561007 |
| B1MZM8 | 349519 |
| B1VDC4 | 504474 |
| B1VNL4 | 455632 |
| B1VXI9 | 455632 |
| B1VXY9 | 455632 |
| B1W126 | 455632 |
| B1W5U4 | 455632 |
| B1W5V3 | 455632 |
| B1X104 | 43989  |
| B1XE11 | 316385 |
| B1XES2 | 316385 |
| B1XUZ8 | 452638 |
| B1Y7F0 | 395495 |
| B1YB29 | 444157 |
| B1YFC4 | 262543 |
| B1YJ39 | 262543 |
| B1YNT2 | 398577 |
| B1YNZ9 | 398577 |
| B1YY77 | 398577 |
| B1YY96 | 398577 |
| B1Z2C4 | 398577 |
| B1Z3J3 | 398577 |

|        |        |
|--------|--------|
| B1ZJQ2 | 441620 |
| B1ZN19 | 452637 |
| B2A3B2 | 457570 |
| B2AI21 | 164546 |
| B2FL61 | 522373 |
| B2G6M9 | 557433 |
| B2GC11 | 334390 |
| B2GH95 | 378753 |
| B2GKH9 | 378753 |
| B2HKZ1 | 216594 |
| B2HNA5 | 216594 |
| B2HV62 | 405416 |
| B2HXN6 | 405416 |
| B2I8G2 | 405441 |
| B2IBL5 | 395963 |
| B2IDQ5 | 395963 |
| B2IPH2 | 516950 |
| B2JR13 | 391038 |
| B2JRB0 | 391038 |
| B2JRS1 | 391038 |
| B2JTH4 | 391038 |
| B2K995 | 502801 |
| B2KAQ5 | 445932 |
| B2RMB9 | 431947 |
| B2SAC4 | 430066 |
| B2SBL1 | 430066 |
| B2SBZ3 | 430066 |
| B2SUG9 | 360094 |
| B2SV49 | 360094 |
| B2SXT7 | 398527 |
| B2T2T6 | 398527 |
| B2TAX4 | 398527 |
| B2TD18 | 398527 |
| B2TD34 | 398527 |
| B2TFX8 | 398527 |
| B2TR83 | 508765 |
| B2TS68 | 508765 |
| B2TXQ4 | 344609 |
| B2U6L4 | 402626 |
| B2U6Q6 | 402626 |
| B2U9D8 | 402626 |
| B2UB44 | 402626 |
| B2USR7 | 512562 |
| B2V104 | 508767 |
| B2V5A8 | 508767 |
| B2V6F1 | 436114 |

|        |        |
|--------|--------|
| B2VE56 | 338565 |
| B3CM06 | 570417 |
| B3CQP2 | 334380 |
| B3DTC8 | 205913 |
| B3E936 | 398767 |
| B3EH29 | 290315 |
| B3EMS4 | 331678 |
| B3GXP5 | 537457 |
| B3PPG3 | 491916 |
| B3PQ74 | 491916 |
| B3PTP6 | 491916 |
| B3PUM9 | 491916 |
| B3PW83 | 491916 |
| B3Q3A0 | 491916 |
| B3Q3G8 | 491916 |
| B3Q4S7 | 491916 |
| B3Q5C0 | 491916 |
| B3Q5M4 | 491916 |
| B3Q7F3 | 395960 |
| B3Q8S5 | 395960 |
| B3QAY0 | 395960 |
| B3QF89 | 395960 |
| B3QJG3 | 395960 |
| B3QM33 | 517417 |
| B3QUT2 | 517418 |
| B3R4G0 | 164546 |
| B3W7E5 | 543734 |
| B4E967 | 216591 |
| B4ED89 | 216591 |
| B4EGM8 | 216591 |
| B4EHE5 | 216591 |
| B4ELG9 | 216591 |
| B4ETW3 | 529507 |
| B4EY78 | 529507 |
| B4EZP1 | 529507 |
| B4FK44 | 4577   |
| B4RCW4 | 450851 |
| B4RZW5 | 314275 |
| B4S5J5 | 290512 |
| B4SE03 | 324925 |
| B4SRX7 | 391008 |
| B4STK9 | 391008 |
| B4SVM9 | 423368 |
| B4T0L6 | 423368 |
| B4T864 | 454169 |
| B4TD64 | 454169 |

|        |        |
|--------|--------|
| B4TR62 | 439843 |
| B4U7D7 | 380749 |
| B4UHY1 | 447217 |
| B5BB16 | 554290 |
| B5E4D5 | 512566 |
| B5EGX4 | 404380 |
| B5ELM5 | 380394 |
| B5ESB0 | 388396 |
| B5F0L5 | 454166 |
| B5F8P8 | 454166 |
| B5FGX4 | 388396 |
| B5FKF1 | 439851 |
| B5FQH9 | 439851 |
| B5R391 | 550537 |
| B5R4J6 | 550537 |
| B5R7I3 | 550538 |
| B5RCV9 | 550538 |
| B5XNR4 | 507522 |
| B5XPX2 | 507522 |
| B5XQV8 | 507522 |
| B5Y2B8 | 507522 |
| B5Y2Y6 | 507522 |
| B5Y9P1 | 309798 |
| B5YEB3 | 309799 |
| B5Z015 | 444450 |
| B5Z6I0 | 563041 |
| B5ZFF8 | 272568 |
| B5ZSP3 | 395492 |
| B5ZVU7 | 395492 |
| B5ZW64 | 395492 |
| B6A0A0 | 395492 |
| B6A0C9 | 395492 |
| B6A0E6 | 395492 |
| B6A0Z3 | 395492 |
| B6A110 | 395492 |
| B6A1H6 | 395492 |
| B6A1Y8 | 395492 |
| B6A210 | 395492 |
| B6A4N5 | 395492 |
| B6A4U8 | 395492 |
| B6EJT2 | 316275 |
| B6HI89 | 500485 |
| B6I548 | 409438 |
| B6IN13 | 414684 |
| B6IZQ6 | 434923 |
| B6J7N2 | 434924 |

|        |        |
|--------|--------|
| B6JF33 | 504832 |
| B6JGA4 | 504832 |
| B6JL09 | 570508 |
| B6YQ20 | 511995 |
| B6YU51 | 523850 |
| B7GNP0 | 391904 |
| B7GNQ1 | 391904 |
| B7GPM8 | 391904 |
| B7GUF5 | 391904 |
| B7GYH4 | 557600 |
| B7H1R3 | 557600 |
| B7H4G7 | 557600 |
| B7HA53 | 405532 |
| B7HDS2 | 405532 |
| B7HLD2 | 405534 |
| B7HUE3 | 405534 |
| B7I214 | 480119 |
| B7I2F0 | 480119 |
| B7I7Z1 | 480119 |
| B7IF13 | 484019 |
| B7IJQ6 | 405531 |
| B7ITP9 | 405531 |
| B7J6C4 | 243159 |
| B7JJ76 | 405535 |
| B7JRU9 | 405535 |
| B7KG19 | 65393  |
| B7KVC7 | 440085 |
| B7KZ98 | 440085 |
| B7LCL6 | 585055 |
| B7LKG3 | 585054 |
| B7LWE4 | 585054 |
| B7MDV0 | 585035 |
| B7MFU2 | 585035 |
| B7MHX1 | 585035 |
| B7MMI3 | 585035 |
| B7MYB7 | 585397 |
| B7N660 | 585056 |
| B7NGU5 | 585056 |
| B7NQL6 | 585057 |
| B7UGM8 | 574521 |
| B7UIB2 | 574521 |
| B7UKV6 | 574521 |
| B7UWS4 | 557722 |
| B7V2D6 | 557722 |
| B7V6B8 | 557722 |
| B7VAY6 | 557722 |

|        |        |
|--------|--------|
| B7VIM2 | 575788 |
| B8CLL5 | 225849 |
| B8CMS5 | 225849 |
| B8CNA7 | 225849 |
| B8CWF6 | 373903 |
| B8D5P3 | 490899 |
| B8D702 | 561501 |
| B8D8P8 | 563178 |
| B8DE74 | 552536 |
| B8DKU0 | 883    |
| B8DWI2 | 442563 |
| B8E2S8 | 515635 |
| B8E724 | 407976 |
| B8ESC8 | 395965 |
| B8F3R4 | 557723 |
| B8FAR9 | 439235 |
| B8FM58 | 439235 |
| B8FQY8 | 272564 |
| B8GB87 | 326427 |
| B8GKG7 | 521011 |
| B8GN57 | 396588 |
| B8H481 | 565050 |
| B8H6L6 | 452863 |
| B8HG81 | 452863 |
| B8HGK2 | 452863 |
| B8HGR8 | 452863 |
| B8HGT2 | 452863 |
| B8HYL7 | 395961 |
| B8I0P6 | 394503 |
| B8I2H0 | 394503 |
| B8I6L6 | 394503 |
| B8IEW0 | 460265 |
| B8INC9 | 460265 |
| B8INF0 | 460265 |
| B8IPM2 | 460265 |
| B8IQH1 | 460265 |
| B8ISM1 | 460265 |
| B8IW08 | 460265 |
| B8J1F6 | 525146 |
| B8J2R9 | 525146 |
| B8JAN5 | 455488 |
| B8N0F3 | 332952 |
| B8ZPG7 | 561276 |
| B8ZRR3 | 561304 |
| B9DP23 | 396513 |
| B9DS79 | 218495 |



|        |        |
|--------|--------|
| B9E5W5 | 583346 |
| B9EBZ6 | 458233 |
| B9IV88 | 361100 |
| B9J360 | 361100 |
| B9JC65 | 311403 |
| B9JDW8 | 311403 |
| B9JHT9 | 311403 |
| B9JJ86 | 311403 |
| B9JJX3 | 311403 |
| B9JL23 | 311403 |
| B9JLK6 | 311403 |
| B9JLL7 | 311403 |
| B9JLY0 | 311403 |
| B9JNI0 | 311403 |
| B9JNQ3 | 311403 |
| B9JUM8 | 311402 |
| B9JXZ4 | 311402 |
| B9K0G4 | 311402 |
| B9K1C6 | 311402 |
| B9K1Y2 | 311402 |
| B9K4Z4 | 311402 |
| B9KFX0 | 306263 |
| B9KI57 | 320483 |
| B9KMM3 | 557760 |
| B9KTQ5 | 557760 |
| B9KTV4 | 557760 |
| B9KY71 | 309801 |
| B9L9Q7 | 598659 |
| B9LGR9 | 480224 |
| B9LTM4 | 416348 |
| B9LUB2 | 416348 |
| B9M380 | 316067 |
| B9MER6 | 535289 |
| B9MRD1 | 521460 |
| C0PYR9 | 476213 |
| C0Q0K6 | 476213 |
| C0QD66 | 177437 |
| C0QT41 | 123214 |
| C0R176 | 565034 |
| C0R398 | 66084  |
| C0RHY8 | 546272 |
| C0RKH4 | 546272 |
| C0RKV1 | 546272 |
| C0ZF35 | 358681 |
| C0ZJG4 | 358681 |
| C0ZMA0 | 234621 |

|        |        |
|--------|--------|
| C0ZRA5 | 234621 |
| C0ZYK5 | 234621 |
| C1A0Q0 | 234621 |
| C1A409 | 379066 |
| C1AFL5 | 561275 |
| C1ARW0 | 632772 |
| C1ASP1 | 632772 |
| C1B2L1 | 632772 |
| C1B363 | 632772 |
| C1B513 | 632772 |
| C1C6Z0 | 488221 |
| C1CE08 | 488222 |
| C1CK93 | 488223 |
| C1CRD6 | 487213 |
| C1D1Y8 | 546414 |
| C1D3H3 | 546414 |
| C1D433 | 546414 |
| C1DD55 | 557598 |
| C1DXN1 | 204536 |
| C1EP21 | 572264 |
| C1EXW3 | 572264 |
| C1F5T7 | 240015 |
| C1F658 | 240015 |
| C1FL29 | 536232 |
| C3K6P5 | 216595 |
| C3KCC5 | 216595 |
| C3KCV2 | 216595 |
| C3KD56 | 216595 |
| C3KL84 | 394    |
| C3KMD1 | 394    |
| C3KQJ0 | 394    |
| C3KTL4 | 515621 |
| C3L7C8 | 568206 |
| C3LG19 | 568206 |
| C3LPG2 | 579112 |
| C3M951 | 394    |
| C3MBN0 | 394    |
| C3MHP5 | 394    |
| C3MJG0 | 429572 |
| C3MKQ5 | 429572 |
| C3ML51 | 429572 |
| C3MS79 | 427317 |
| C3MSA8 | 427317 |
| C3MTU2 | 427317 |
| C3N0F2 | 427318 |
| C3N1K0 | 427318 |

|        |        |
|--------|--------|
| C3N1M9 | 427318 |
| C3N8E0 | 439386 |
| C3NA77 | 439386 |
| C3NAA9 | 439386 |
| C3NJB5 | 419942 |
| C3NL95 | 419942 |
| C3NLC2 | 419942 |
| C3NNM5 | 593588 |
| C3P5K2 | 592021 |
| C3PD58 | 592021 |
| C3PEF2 | 548476 |
| C3PH04 | 548476 |
| C3PNF5 | 347255 |
| C4K288 | 562019 |
| C4K791 | 572265 |
| C4KB29 | 85643  |
| C4KJK0 | 426118 |
| C4KKN0 | 426118 |
| C4KKR1 | 426118 |
| C4KNL7 | 536230 |
| C4KRY6 | 536230 |
| C4LB09 | 595494 |
| C4LDF6 | 595494 |
| C4LJ67 | 645127 |
| C4LL82 | 645127 |
| C4PR36 | 580049 |
| C4X871 | 484021 |
| C4XAH9 | 484021 |
| C4XBU9 | 484021 |
| C4XUG2 | 573370 |
| C4Z2K5 | 515620 |
| C4Z902 | 515619 |
| C4ZG60 | 515619 |
| C4ZHF4 | 515619 |
| C4ZRG0 | 595496 |
| C5A8D5 | 626418 |
| C5A9S9 | 626418 |
| C5ADX3 | 626418 |
| C5AHB8 | 626418 |
| C5AIY9 | 626418 |
| C5AIZ6 | 626418 |
| C5ALP8 | 626418 |
| C5AU72 | 272630 |
| C5AY41 | 272630 |
| C5B7A2 | 634503 |
| C5BE76 | 634503 |

|        |        |
|--------|--------|
| C5BQD1 | 377629 |
| C5BWQ0 | 471853 |
| C5BZF7 | 471853 |
| C5BZP0 | 471853 |
| C5C2K7 | 471853 |
| C5C3V4 | 471853 |
| C5C541 | 471853 |
| C5C5P2 | 471853 |
| C5C6J0 | 471853 |
| C5C9U5 | 465515 |
| C5CAU0 | 465515 |
| C5CFI2 | 521045 |
| C5CPI2 | 543728 |
| C5CRE8 | 543728 |
| C5CSU2 | 543728 |
| C5CUQ8 | 543728 |
| C5CZ39 | 543728 |
| C5CZG3 | 543728 |
| C5D0U0 | 543728 |
| C5D0X0 | 543728 |
| C5D1Q7 | 543728 |
| C5VVH7 | 218494 |
| C5ZZZ4 | 604354 |
| C6A4E2 | 604354 |
| C6A980 | 580050 |
| C6ACI7 | 634504 |
| C6AFC2 | 555970 |
| C6ARM9 | 395491 |
| C6ATG1 | 395491 |
| C6ATS4 | 395491 |
| C6AVE9 | 395491 |
| C6AY49 | 395491 |
| C6B4B0 | 395491 |
| C6B4Q5 | 395491 |
| C6B5M5 | 395491 |
| C6B5P6 | 395491 |
| C6BA02 | 395491 |
| C6BB07 | 395491 |
| C6BCF4 | 428406 |
| C6BDC7 | 428406 |
| C6BG76 | 428406 |
| C6C2X7 | 579405 |
| C6C501 | 579405 |
| C6C663 | 579405 |
| C6C7K0 | 579405 |
| C6CA25 | 579405 |

|        |        |
|--------|--------|
| C6CDL4 | 579405 |
| C6CK12 | 561229 |
| C6CQL0 | 561229 |
| C6D2D9 | 324057 |
| C6D630 | 324057 |
| C6DBS0 | 561230 |
| C6DEB8 | 561230 |
| C6DGJ2 | 561230 |
| C6DLF4 | 478434 |
| C6E9Q9 | 443144 |
| C6GS15 | 568813 |
| C6GTM8 | 568814 |
| C6SQR7 | 511691 |
| C6UB86 | 413997 |
| C6UQM8 | 544404 |
| C6V639 | 434131 |
| C6VJ20 | 644042 |
| C6VR51 | 644042 |
| C6VS77 | 471854 |
| C6VYY4 | 471854 |
| C6W118 | 471854 |
| C6WDI3 | 446462 |
| C6WN40 | 446462 |
| C6X0P9 | 531844 |
| C6XDF4 | 582744 |
| C6XHK6 | 537021 |
| C6XJY7 | 582402 |
| C6XTJ4 | 485917 |
| C6Y0I5 | 485917 |
| C6Y1M1 | 485917 |
| C6Y470 | 485917 |
| C7BGW6 | 553480 |
| C7BK04 | 553480 |
| C7BYI2 | 592205 |
| C7CBF3 | 661410 |
| C7CC66 | 661410 |
| C7JH79 | 634452 |
| C7LAV8 | 568815 |
| C7LH83 | 568815 |
| C7LHP8 | 568815 |
| C7LKC0 | 595499 |
| C7LN00 | 525897 |
| C7LXZ2 | 525909 |
| C7M875 | 521097 |
| C7M9Z3 | 446465 |
| C7MB37 | 446465 |

|        |        |
|--------|--------|
| C7MBC1 | 446465 |
| C7MN92 | 469378 |
| C7MNH1 | 469378 |
| C7MZF2 | 471857 |
| C7N471 | 471855 |
| C7NAR3 | 523794 |
| C7NV35 | 519442 |
| C7NV78 | 519442 |
| C7NWM0 | 485914 |
| C7P2G1 | 485914 |
| C7P6S9 | 573064 |
| C7PAP9 | 485918 |
| C7PMD2 | 485918 |
| C7QF16 | 479433 |
| C7QFA5 | 479433 |
| C7QI35 | 479433 |
| C7R3F2 | 471856 |
| C7R3Y7 | 471856 |
| C7RCP7 | 523791 |
| C7TGH3 | 568704 |
| C8U801 | 585395 |
| C8VJZ9 | 227321 |
| C8W4M0 | 485916 |
| C8W7B8 | 521095 |
| C8W8B5 | 521095 |
| C8WBL5 | 622759 |
| C8WDY8 | 622759 |
| C8WHK3 | 479437 |
| C8WJI4 | 479437 |
| C8WRJ5 | 521098 |
| C8WWK4 | 521098 |
| C8X411 | 485915 |
| C8X840 | 479431 |
| C8XJF3 | 479431 |
| C9RKP4 | 59374  |
| C9XQ20 | 645462 |
| C9XRH2 | 645462 |
| C9XRH4 | 645462 |
| C9XST0 | 645462 |
| C9XVII | 413502 |
| C9XXL1 | 413502 |
| C9Y5E4 | 413502 |
| C9YQH0 | 645463 |
| C9YR65 | 645463 |
| C9YR67 | 645463 |
| C9YSC0 | 645463 |

|        |        |
|--------|--------|
| C9YYA9 | 680198 |
| C9YYD5 | 680198 |
| C9Z234 | 680198 |
| C9Z6M9 | 680198 |
| C9Z7W8 | 680198 |
| C9ZAR0 | 680198 |
| D0B673 | 224914 |
| D0FNJ5 | 79967  |
| D0FQB5 | 79967  |
| D0FQH7 | 79967  |
| D0IX32 | 688245 |
| D0J2D8 | 688245 |
| D0J602 | 688245 |
| D0J9L9 | 600809 |
| D0JAP4 | 331104 |
| D0K4X0 | 681288 |
| D0KBI2 | 561231 |
| D0KCD2 | 561231 |
| D0KIX6 | 561231 |
| D0KLW1 | 561231 |
| D0KLW5 | 561231 |
| D0KYK6 | 555778 |
| D0LBM4 | 526226 |
| D0LJC8 | 502025 |
| D0M0B9 | 150340 |
| D0MEU6 | 518766 |
| D0MJ86 | 518766 |
| D0R4B4 | 633699 |
| D0ZEY7 | 498217 |
| D1AAD5 | 471852 |
| D1ANM6 | 526218 |
| D1ASG1 | 574556 |
| D1AYT8 | 519441 |
| D1B1W3 | 525898 |
| D1BJ50 | 446469 |
| D1BMK4 | 479436 |
| D1C071 | 446471 |
| D1C5L0 | 479434 |
| D1C8S2 | 479434 |
| D1CAQ9 | 479434 |
| D1YV26 | 304371 |
| D1YWA9 | 304371 |
| D2AV88 | 479432 |
| D2AXY0 | 479432 |
| D2AYJ0 | 479432 |
| D2B182 | 479432 |

|        |        |
|--------|--------|
| D2B2X1 | 479432 |
| D2BFP3 | 479432 |
| D2BI24 | 311424 |
| D2BKQ5 | 684738 |
| D2BQY9 | 684738 |
| D2BUR9 | 590409 |
| D2BVR9 | 590409 |
| D2BWH3 | 590409 |
| D2BY70 | 590409 |
| D2BZ30 | 590409 |
| D2BZN5 | 590409 |
| D2C301 | 590409 |
| D2C3R9 | 590168 |
| D2NNS6 | 680646 |
| D2P260 | 653938 |
| D2P4Z6 | 637381 |
| D2PE01 | 425944 |
| D2PFU0 | 425944 |
| D2PFW3 | 425944 |
| D2PLV8 | 479435 |
| D2PWS2 | 479435 |
| D2PYI2 | 479435 |
| D2Q1Q5 | 479435 |
| D2Q5X9 | 401473 |
| D2QG66 | 504472 |
| D2QGP8 | 504472 |
| D2QN45 | 504472 |
| D2QUR4 | 504472 |
| D2QW61 | 530564 |
| D2R485 | 530564 |
| D2R9F4 | 530564 |
| D2RDF8 | 572546 |
| D2RKF2 | 591001 |
| D2RMZ3 | 591001 |
| D2RW27 | 543526 |
| D2RX78 | 543526 |
| D2RZP5 | 543526 |
| D2S0Y4 | 543526 |
| D2S1K0 | 543526 |
| D2S1M1 | 543526 |
| D2S4C0 | 526225 |
| D2SD07 | 526225 |
| D2SDU6 | 526225 |
| D2TIF2 | 637910 |
| D2TK04 | 637910 |
| D2TTB3 | 637910 |



|        |        |
|--------|--------|
| D2TU27 | 637910 |
| D2TU80 | 637910 |
| D2TUM2 | 637910 |
| D2U8E6 | 380358 |
| D2UEC0 | 380358 |
| D3DYX1 | 634498 |
| D3E6N4 | 481743 |
| D3EEF0 | 481743 |
| D3EIE3 | 481743 |
| D3EJZ4 | 481743 |
| D3EL06 | 481743 |
| D3EMT9 | 713887 |
| D3EZY8 | 469383 |
| D3FDP9 | 469383 |
| D3FE39 | 469383 |
| D3H934 | 365659 |
| D3HDJ4 | 637909 |
| D3HGD9 | 637909 |
| D3NUF4 | 137722 |
| D3P161 | 137722 |
| D3P2I0 | 137722 |
| D3P6D4 | 137722 |
| D3P7S9 | 137722 |
| D3PRL4 | 504728 |
| D3Q111 | 446470 |
| D3Q1E3 | 446470 |
| D3Q2I9 | 446470 |
| D3QCX6 | 698737 |
| D3QM57 | 701177 |
| D3R8S4 | 640131 |
| D3RCU8 | 640131 |
| D3REW3 | 640131 |
| D3RFW7 | 640131 |
| D3RKF1 | 640131 |
| D3RY72 | 589924 |
| D3S6L2 | 644281 |
| D3SJ26 | 633145 |
| D3SSE1 | 547559 |
| D3SZP0 | 547559 |
| D3T7X5 | 580331 |
| D3UJI0 | 679897 |
| D3V7E2 | 406818 |
| D3VFM1 | 406817 |
| D3VH41 | 406817 |
| D3VI77 | 406817 |
| D4G7V5 | 515618 |

|        |        |
|--------|--------|
| D4GCS7 | 706191 |
| D4GEP2 | 706191 |
| D4GIJ4 | 706191 |
| D4GIW6 | 706191 |
| D4GK06 | 706191 |
| D4GP99 | 309800 |
| D4GPZ5 | 309800 |
| D4GW28 | 309800 |
| D4H4C2 | 522772 |
| D4HAE1 | 553199 |
| D4HCG6 | 553199 |
| D4HY75 | 665029 |
| D4HYD7 | 665029 |
| D4I8B5 | 716540 |
| D4I8H1 | 716540 |
| D4Z688 | 452662 |
| D4ZJ32 | 637905 |
| D4ZKI7 | 637905 |
| D5AM74 | 272942 |
| D5B1C1 | 637386 |
| D5BIF1 | 655815 |
| D5BK41 | 655815 |
| D5BNX6 | 488538 |
| D5BR88 | 488538 |
| D5BWV0 | 472759 |
| D5C6Z8 | 716541 |
| D5C8V4 | 716541 |
| D5CBB0 | 716541 |
| D5CF43 | 716541 |
| D5D8T2 | 641892 |
| D5DDJ9 | 592022 |
| D5DKV8 | 592022 |
| D5DQ48 | 545693 |
| D5E1Y2 | 545693 |
| D5EC21 | 547558 |
| D5EH49 | 572547 |
| D5EJ55 | 583355 |
| D5ESD5 | 264731 |
| D5H2T9 | 748671 |
| D5SQS5 | 521674 |
| D5SVD4 | 521674 |
| D5T5I1 | 762051 |
| D5T7I7 | 423212 |
| D5TNQ9 | 714359 |
| D5TUT4 | 714359 |
| D5UAX2 | 526224 |

|        |        |
|--------|--------|
| D5UD90 | 446466 |
| D5UMA0 | 521096 |
| D5UPJ0 | 521096 |
| D5V0G9 | 572480 |
| D5V3A6 | 572480 |
| D5V3H2 | 572480 |
| D5VA07 | 749219 |
| D5VKW2 | 509190 |
| D5WE15 | 640511 |
| D5WGB0 | 640511 |
| D5WI55 | 640511 |
| D5WIR3 | 640511 |
| D5WLV7 | 640511 |
| D5WPM0 | 562970 |
| D5WPM5 | 562970 |
| D5WY73 | 75379  |
| D5XF37 | 635013 |
| D6XU19 | 439292 |
| D6Y7Y3 | 469371 |
| D6YVH1 | 716544 |
| D6Z916 | 640132 |
| D6ZLC6 | 525381 |
| D6ZSW1 | 759350 |
| D6ZWJ9 | 759350 |
| D6ZY10 | 759350 |
| D6ZZ88 | 639283 |
| D7A0U5 | 639283 |
| D7A0Y5 | 639283 |
| D7A101 | 639283 |
| D7A5B9 | 639283 |
| D7AAC5 | 639283 |
| D7AMY7 | 583358 |
| D7AYA7 | 446468 |
| D7B664 | 446468 |
| D7BIJ2 | 526227 |
| D7BP32 | 644284 |
| D7CM70 | 643648 |
| D7CQM5 | 649638 |
| D7D631 | 691437 |
| D7DRN6 | 456320 |
| D7E164 | 551115 |
| D7EB04 | 644295 |
| D7FES9 | 693745 |
| D7GF03 | 754252 |
| O05969 | 782    |
| O25657 | 210    |

|        |        |
|--------|--------|
| O26892 | 187420 |
| O29352 | 2234   |
| O58577 | 53953  |
| O67216 | 63363  |
| O84366 | 813    |
| O86841 | 1902   |
| P19808 | 1718   |
| P43797 | 727    |
| P49423 | 1219   |
| P58207 | 381    |
| P63943 | 217992 |
| P63945 | 1773   |
| P63946 | 1765   |
| P63947 | 158878 |
| P63948 | 158879 |
| Q01R27 | 234267 |
| Q024Z1 | 234267 |
| Q02D66 | 234267 |
| Q02T10 | 208963 |
| Q02UL2 | 208963 |
| Q02XU7 | 272622 |
| Q03CW3 | 321967 |
| Q03HT2 | 278197 |
| Q03K16 | 322159 |
| Q03YE2 | 203120 |
| Q04FS1 | 203123 |
| Q04KR9 | 373153 |
| Q04U80 | 355277 |
| Q053P3 | 355276 |
| Q058B1 | 372461 |
| Q05FN5 | 387662 |
| Q07KS7 | 316055 |
| Q07M65 | 316055 |
| Q082V3 | 318167 |
| Q0APB2 | 394221 |
| Q0AXH6 | 335541 |
| Q0B2H2 | 339670 |
| Q0B5F4 | 339670 |
| Q0B5Y2 | 339670 |
| Q0BBC4 | 339670 |
| Q0BG20 | 339670 |
| Q0BSV9 | 391165 |
| Q0BYG4 | 228405 |
| Q0HHQ6 | 60480  |
| Q0HU08 | 60481  |
| Q0I260 | 205914 |

|        |        |
|--------|--------|
| Q0IE16 | 64471  |
| Q0K061 | 381666 |
| Q0K2U1 | 381666 |
| Q0K4R0 | 381666 |
| Q0PB32 | 197    |
| Q0RDU6 | 326424 |
| Q0RXH3 | 101510 |
| Q0S0T5 | 101510 |
| Q0S1R7 | 101510 |
| Q0S5X0 | 101510 |
| Q0SCP1 | 101510 |
| Q0SCQ5 | 101510 |
| Q0SJ38 | 101510 |
| Q0SRS5 | 289380 |
| Q0T239 | 373384 |
| Q0TEZ8 | 362663 |
| Q0TK08 | 362663 |
| Q0TP55 | 195103 |
| Q0V0Q5 | 13684  |
| Q0W314 | 351160 |
| Q0W675 | 351160 |
| Q118P2 | 203124 |
| Q11AT3 | 266779 |
| Q11BU9 | 266779 |
| Q11DL4 | 266779 |
| Q11F73 | 266779 |
| Q11JT7 | 266779 |
| Q11VI2 | 269798 |
| Q125T0 | 296591 |
| Q128F8 | 296591 |
| Q129P0 | 296591 |
| Q12BF6 | 296591 |
| Q12BH0 | 296591 |
| Q12NF7 | 318161 |
| Q12ZG2 | 259564 |
| Q132Q2 | 316057 |
| Q135A1 | 316057 |
| Q136X0 | 316057 |
| Q13DE3 | 316057 |
| Q13J43 | 266265 |
| Q13LF8 | 266265 |
| Q13MZ2 | 266265 |
| Q13PW0 | 266265 |
| Q146P4 | 266265 |
| Q15SZ4 | 342610 |
| Q16BK4 | 375451 |

|        |        |
|--------|--------|
| Q16C65 | 375451 |
| Q17WU7 | 382638 |
| Q17ZW8 | 272563 |
| Q17ZX0 | 272563 |
| Q181M9 | 272563 |
| Q184J1 | 272563 |
| Q18HQ1 | 362976 |
| Q18K17 | 362976 |
| Q1ATU0 | 266117 |
| Q1AZ77 | 266117 |
| Q1AZV1 | 266117 |
| Q1B8R2 | 164756 |
| Q1BA60 | 164756 |
| Q1BBC9 | 164756 |
| Q1BIC8 | 331271 |
| Q1BJT5 | 331271 |
| Q1BKC4 | 331271 |
| Q1BKP7 | 331271 |
| Q1BMP2 | 331271 |
| Q1BT22 | 331271 |
| Q1BV84 | 331271 |
| Q1C5Q4 | 360102 |
| Q1CK27 | 377628 |
| Q1CU72 | 357544 |
| Q1CXM5 | 246197 |
| Q1CZ39 | 246197 |
| Q1CZV8 | 246197 |
| Q1GG89 | 292414 |
| Q1GME4 | 292414 |
| Q1GSC8 | 117207 |
| Q1I6I8 | 384676 |
| Q1IAX8 | 384676 |
| Q1IEM7 | 384676 |
| Q1INQ6 | 204669 |
| Q1LCR5 | 266264 |
| Q1LD20 | 266264 |
| Q1LPH2 | 266264 |
| Q1LQM4 | 266264 |
| Q1M341 | 216596 |
| Q1M3T7 | 216596 |
| Q1M4D2 | 216596 |
| Q1M599 | 216596 |
| Q1M709 | 216596 |
| Q1M7N5 | 216596 |
| Q1M8Q7 | 216596 |
| Q1MAR8 | 216596 |

|        |        |
|--------|--------|
| Q1MAX6 | 216596 |
| Q1MD94 | 216596 |
| Q1ME92 | 216596 |
| Q1MIA4 | 216596 |
| Q1MJ63 | 216596 |
| Q1QBF5 | 335284 |
| Q1QEG1 | 335284 |
| Q1QL43 | 323097 |
| Q1QU05 | 290398 |
| Q1R5G0 | 364106 |
| Q1R8P9 | 364106 |
| Q1REP2 | 364106 |
| Q1RIJ3 | 336407 |
| Q20Y81 | 316056 |
| Q211L1 | 316056 |
| Q214K7 | 316056 |
| Q216I5 | 316056 |
| Q21A63 | 316056 |
| Q21WN2 | 338969 |
| Q21XY7 | 338969 |
| Q21ZN5 | 338969 |
| Q221U8 | 338969 |
| Q24UK5 | 138119 |
| Q255G0 | 264202 |
| Q28JT1 | 290400 |
| Q28SB0 | 290400 |
| Q28SE2 | 290400 |
| Q2FNR0 | 323259 |
| Q2G8D6 | 279238 |
| Q2GCK3 | 222891 |
| Q2GG09 | 205920 |
| Q2IGX5 | 290397 |
| Q2IRF2 | 316058 |
| Q2IT09 | 316058 |
| Q2IWV5 | 316058 |
| Q2IXK2 | 316058 |
| Q2J746 | 106370 |
| Q2JQ67 | 321332 |
| Q2JWL7 | 321327 |
| Q2JYP8 | 347834 |
| Q2JZ58 | 347834 |
| Q2JZJ9 | 347834 |
| Q2K187 | 347834 |
| Q2K1W0 | 347834 |
| Q2K3G4 | 347834 |
| Q2K5H1 | 347834 |

|        |        |
|--------|--------|
| Q2K6H5 | 347834 |
| Q2KAF2 | 347834 |
| Q2KCL4 | 347834 |
| Q2KXD5 | 360910 |
| Q2L1M0 | 360910 |
| Q2LTA1 | 56780  |
| Q2N9J7 | 314225 |
| Q2NHW2 | 339860 |
| Q2NS74 | 343509 |
| Q2P143 | 342109 |
| Q2P1P8 | 342109 |
| Q2RJK7 | 264732 |
| Q2RKS9 | 264732 |
| Q2RP09 | 269796 |
| Q2RT80 | 269796 |
| Q2S2M2 | 309807 |
| Q2S3M1 | 309807 |
| Q2SHE8 | 349521 |
| Q2T0E0 | 271848 |
| Q2T1R8 | 271848 |
| Q2T3J3 | 271848 |
| Q2UIX1 | 5062   |
| Q2W478 | 342108 |
| Q2W4Y2 | 342108 |
| Q2YJT0 | 359391 |
| Q2YK64 | 359391 |
| Q2YMY1 | 359391 |
| Q2YXX4 | 273036 |
| Q30R77 | 326298 |
| Q310Q2 | 207559 |
| Q317Y9 | 74546  |
| Q31FC9 | 317025 |
| Q31Y13 | 300268 |
| Q32D87 | 300267 |
| Q390E9 | 269483 |
| Q394V7 | 269483 |
| Q396X5 | 269483 |
| Q39BG6 | 269483 |
| Q39CC4 | 269483 |
| Q39EX1 | 269483 |
| Q39LG7 | 269483 |
| Q39LK1 | 269483 |
| Q39Z67 | 269799 |
| Q3A1U7 | 338963 |
| Q3ACIO | 246194 |
| Q3ANI5 | 110662 |



|        |        |
|--------|--------|
| Q3APU0 | 340177 |
| Q3B0T8 | 316279 |
| Q3B2G4 | 319225 |
| Q3BRY8 | 316273 |
| Q3BUP1 | 316273 |
| Q3IJ34 | 326442 |
| Q3ISQ0 | 348780 |
| Q3IVH2 | 272943 |
| Q3IWM4 | 272943 |
| Q3IWS2 | 272943 |
| Q3IZG9 | 272943 |
| Q3J869 | 323261 |
| Q3JHB0 | 320372 |
| Q3JV31 | 320372 |
| Q3JWT2 | 320372 |
| Q3KGQ6 | 205922 |
| Q3KLZ5 | 315277 |
| Q3SRA2 | 323098 |
| Q3SU94 | 323098 |
| Q3YSK1 | 269484 |
| Q3YZ74 | 300269 |
| Q3Z7V3 | 243164 |
| Q3ZXV3 | 255470 |
| Q46DC4 | 269797 |
| Q46ID7 | 59920  |
| Q47HS9 | 159087 |
| Q47RT8 | 269800 |
| Q485S4 | 167879 |
| Q48L68 | 264730 |
| Q492F5 | 291272 |
| Q49XJ7 | 342451 |
| Q4FLS1 | 198252 |
| Q4FP92 | 198252 |
| Q4FVD6 | 259536 |
| Q4JC96 | 2285   |
| Q4JV64 | 306537 |
| Q4KBF7 | 220664 |
| Q4KGP8 | 220664 |
| Q4KGU1 | 220664 |
| Q4KGV9 | 220664 |
| Q4L6A0 | 279808 |
| Q4QNT3 | 281310 |
| Q4ULR2 | 42862  |
| Q4UTT0 | 314565 |
| Q4UW06 | 314565 |
| Q4W8W3 | 5085   |

|        |        |
|--------|--------|
| Q4ZW06 | 205918 |
| Q4ZW75 | 205918 |
| Q55513 | 1148   |
| Q57695 | 2190   |
| Q577J6 | 235    |
| Q57E96 | 235    |
| Q57IU4 | 28901  |
| Q57LM2 | 28901  |
| Q5E3I3 | 312309 |
| Q5F849 | 242231 |
| Q5FE59 | 254945 |
| Q5FHF1 | 302409 |
| Q5FKQ9 | 1579   |
| Q5FUW9 | 442    |
| Q5GT73 | 292805 |
| Q5HBR0 | 254945 |
| Q5HG25 | 93062  |
| Q5HPE7 | 176279 |
| Q5HUY6 | 195099 |
| Q5HVY5 | 195099 |
| Q5JGK8 | 311400 |
| Q5KA86 | 5207   |
| Q5KYJ0 | 1462   |
| Q5L5G7 | 83555  |
| Q5L8P3 | 272559 |
| Q5LCH9 | 272559 |
| Q5LKW2 | 89184  |
| Q5LMK7 | 89184  |
| Q5LPG6 | 89184  |
| Q5LSR5 | 89184  |
| Q5LZ67 | 299768 |
| Q5M3S2 | 264199 |
| Q5NLD3 | 542    |
| Q5NPL6 | 542    |
| Q5P838 | 76114  |
| Q5PB64 | 234826 |
| Q5SJQ1 | 300852 |
| Q5V3H1 | 2238   |
| Q5V5D4 | 2238   |
| Q5WBX0 | 66692  |
| Q5WDL1 | 66692  |
| Q5WFV6 | 66692  |
| Q5WGE0 | 66692  |
| Q5WJ04 | 66692  |
| Q5WLJ0 | 66692  |
| Q5WUD4 | 297245 |

|        |        |
|--------|--------|
| Q5X183 | 297246 |
| Q5X2X5 | 297246 |
| Q5YSX4 | 37329  |
| Q5YWC2 | 37329  |
| Q5ZT51 | 272624 |
| Q62BA2 | 13373  |
| Q62IC0 | 13373  |
| Q636M7 | 288681 |
| Q63AC1 | 288681 |
| Q63NG8 | 28450  |
| Q63WF2 | 28450  |
| Q63Y42 | 28450  |
| Q64TM6 | 817    |
| Q65VX1 | 221988 |
| Q65VY8 | 221988 |
| Q65WI6 | 221988 |
| Q668F7 | 633    |
| Q6A699 | 1747   |
| Q6AA18 | 1747   |
| Q6AFF4 | 59736  |
| Q6AR63 | 84980  |
| Q6CYT0 | 29471  |
| Q6D0N5 | 29471  |
| Q6D7R3 | 29471  |
| Q6D8H2 | 29471  |
| Q6F6U2 | 62977  |
| Q6G091 | 803    |
| Q6G468 | 38323  |
| Q6G9G6 | 282459 |
| Q6GH13 | 282458 |
| Q6KZI8 | 263820 |
| Q6LN85 | 74109  |
| Q6LZP8 | 39152  |
| Q6MDD9 | 264201 |
| Q6MRM9 | 959    |
| Q6N4Z3 | 1076   |
| Q6N5H6 | 1076   |
| Q6N6D1 | 1076   |
| Q6N9H8 | 1076   |
| Q6NBD0 | 1076   |
| Q6NGP4 | 1717   |
| Q6NJA1 | 1717   |
| Q719I7 | 235    |
| Q71ZN5 | 265669 |
| Q72K27 | 262724 |
| Q732S4 | 222523 |
| Q736N9 | 222523 |
| Q73H02 | 163164 |
| Q73VZ7 | 1770   |
| Q73XB7 | 1770   |
| Q741N1 | 1770   |
| Q74GT6 | 35554  |
| Q7CU96 | 176299 |
| Q7D0E8 | 176299 |

|        |        |
|--------|--------|
| Q7D313 | 176299 |
| Q7D3Z9 | 176299 |
| Q7M7L6 | 844    |
| Q7MC05 | 196600 |
| Q7MIL2 | 196600 |
| Q7MTB9 | 837    |
| Q7N3H1 | 141679 |
| Q7N4S4 | 141679 |
| Q7N6L9 | 141679 |
| Q7NLV1 | 33072  |
| Q7NS49 | 536    |
| Q7NU78 | 536    |
| Q7NWE2 | 536    |
| Q7UA33 | 84588  |
| Q7UGE1 | 265606 |
| Q7UMJ1 | 265606 |
| Q7USB5 | 265606 |
| Q7UVB1 | 265606 |
| Q7UXD2 | 265606 |
| Q7UZK9 | 59919  |
| Q7V990 | 74547  |
| Q7VFP9 | 32025  |
| Q7VM87 | 730    |
| Q7VRT1 | 203907 |
| Q7VS12 | 520    |
| Q7VT65 | 520    |
| Q7W1K7 | 519    |
| Q7W287 | 519    |
| Q7WEB4 | 518    |
| Q7WND2 | 518    |
| Q7WPJ8 | 518    |
| Q7WR54 | 518    |
| Q819Z9 | 226900 |
| Q81CD9 | 226900 |
| Q81PH3 | 1392   |
| Q81WN7 | 1392   |
| Q822H0 | 83557  |
| Q829P3 | 33903  |
| Q829R6 | 33903  |
| Q82BU7 | 33903  |
| Q82K87 | 33903  |
| Q82MC9 | 33903  |
| Q836D1 | 1351   |
| Q83CA6 | 777    |
| Q87AT3 | 183190 |
| Q87MI2 | 670    |
| Q87Q15 | 670    |
| Q88JL0 | 160488 |
| Q88L99 | 160488 |
| Q88NF4 | 160488 |
| Q88U46 | 1590   |
| Q88VD7 | 1590   |
| Q89IS3 | 1513   |
| Q89AY0 | 224915 |

|        |        |
|--------|--------|
| Q89C29 | 375    |
| Q89C45 | 375    |
| Q89DQ7 | 375    |
| Q89E15 | 375    |
| Q89FB7 | 375    |
| Q89JF2 | 375    |
| Q89LX0 | 375    |
| Q89NF6 | 375    |
| Q89Q23 | 375    |
| Q89Q28 | 375    |
| Q8A3Z0 | 818    |
| Q8A9C0 | 818    |
| Q8CP96 | 176280 |
| Q8D2M3 | 36870  |
| Q8DBB0 | 672    |
| Q8DPZ9 | 171101 |
| Q8DUE5 | 1309   |
| Q8EFT7 | 70863  |
| Q8EMH5 | 182710 |
| Q8EMJ7 | 182710 |
| Q8EQJ1 | 182710 |
| Q8FJW9 | 217992 |
| Q8FWP0 | 29461  |
| Q8FX50 | 29461  |
| Q8G1R0 | 29461  |
| Q8G527 | 216816 |
| Q8KC06 | 1097   |
| Q8NMD2 | 1718   |
| Q8NWS5 | 196620 |
| Q8PXL7 | 2209   |
| Q8RB15 | 119072 |
| Q8RQM8 | 152794 |
| Q8THP1 | 2214   |
| Q8TUZ4 | 2320   |
| Q8U319 | 2261   |
| Q8UGL3 | 176299 |
| Q8XJ56 | 1502   |
| Q8XXK2 | 305    |
| Q8Y099 | 305    |
| Q8Y1M5 | 305    |
| Q8Y766 | 1639   |
| Q8YBN7 | 29459  |
| Q8YG60 | 29459  |
| Q8ZCD0 | 632    |
| Q8ZU75 | 13773  |
| Q92BS0 | 1642   |
| Q92I25 | 781    |
| Q92LF2 | 382    |
| Q92R55 | 382    |
| Q92U05 | 382    |
| Q92WT0 | 382    |
| Q92X22 | 382    |
| Q92ZS6 | 382    |
| Q93RY0 | 1902   |

|        |        |
|--------|--------|
| Q96YD3 | 111955 |
| Q979B0 | 273116 |
| Q97D80 | 1488   |
| Q97GI9 | 1488   |
| Q97R25 | 1313   |
| Q97UF0 | 2287   |
| Q97UI2 | 2287   |
| Q97WF2 | 2287   |
| Q988B6 | 381    |
| Q989L2 | 381    |
| Q989T0 | 381    |
| Q98F18 | 381    |
| Q98LI3 | 381    |
| Q9A900 | 155892 |
| Q9AKE4 | 785    |
| Q9CBW4 | 1769   |
| Q9CF61 | 1360   |
| Q9CLZ7 | 747    |
| Q9EZ12 | 93061  |
| Q9HJ17 | 2303   |
| Q9HWJ3 | 287    |
| Q9I490 | 287    |
| Q9I6R5 | 287    |
| Q9KQ47 | 666    |
| Q9PER5 | 2371   |
| Q9PK33 | 83560  |
| Q9PPB4 | 197    |
| Q9RH76 | 375    |
| Q9UZ94 | 29292  |
| Q9X1K9 | 2336   |
| Q9X9W0 | 1902   |
| Q9X9Y3 | 1902   |
| Q9YD89 | 56636  |
| Q9Z6K9 | 83558  |
| Q9ZM13 | 85963  |
| A0B400 | 331272 |
| A0KDT3 | 331272 |
| A0KDV3 | 331272 |
| A0NJU4 | 379360 |
| A0NM70 | 384765 |
| A0NMA5 | 384765 |
| A0NP47 | 384765 |
| A0NXQ6 | 384765 |
| A0P144 | 384765 |
| A0XX40 | 156578 |
| A0YE32 | 247633 |
| A0YKN3 | 313612 |
| A0Z8V0 | 247639 |
| A1BB33 | 318586 |
| A1ELC2 | 345076 |
| A1F3Z4 | 412614 |
| A1HSD2 | 401526 |
| A1ZPG2 | 313606 |
| A1ZYV5 | 313606 |

|         |        |
|---------|--------|
| A2P5L0  | 412966 |
| A2PS52  | 412883 |
| A2TC91  | 13690  |
| A2TRQ1  | 313590 |
| A2TSZ4  | 313590 |
| A2U4B1  | 313598 |
| A2V5G2  | 399804 |
| A2VL89  | 348776 |
| A2VUX9  | 350702 |
| A2W1Q2  | 350702 |
| A2W277  | 350702 |
| A2W2A4  | 350702 |
| A2W4I7  | 350702 |
| A2W520  | 350702 |
| A2W5N6  | 350702 |
| A2W702  | 350701 |
| A2WAR3  | 350701 |
| A2WEE9  | 350701 |
| A2WH12  | 350701 |
| A2WH36  | 350701 |
| A2WJ95  | 350701 |
| A3ENF8  | 345075 |
| A3EQW5  | 419542 |
| A3GPI5  | 417399 |
| A3H0F0  | 417400 |
| A3HVZ6  | 388413 |
| A3I2H3  | 388413 |
| A3I9D5  | 388400 |
| A3ICC5  | 388400 |
| A3J098  | 391598 |
| A3J824  | 270374 |
| A3JGP4  | 270374 |
| A3JI71  | 270374 |
| A3JRQ3  | 388401 |
| A3K1H8  | 388399 |
| A3K3V8  | 388399 |
| A3K8S9  | 388399 |
| A3KHZ7  | 278992 |
| A3KT92  | 350704 |
| A3L0K0  | 350704 |
| A3L5Z2  | 350703 |
| A3LFT1  | 350703 |
| A3LH34  | 350703 |
| A3PP87  | 349101 |
| A3PPD5  | 349101 |
| A3RTG3  | 342110 |
| A3RW68  | 342110 |
| A3R XR3 | 342110 |
| A3RYI1  | 342110 |
| A3S025  | 342110 |
| A3SG05  | 52598  |
| A3SIA3  | 89187  |
| A3SJ32  | 89187  |
| A3SLP3  | 89187  |

|        |        |
|--------|--------|
| A3SQ55 | 89187  |
| A3SQV4 | 89187  |
| A3SV61 | 314267 |
| A3TMG3 | 313589 |
| A3TT45 | 252305 |
| A3TWJ5 | 252305 |
| A3UC80 | 314254 |
| A3UUQ4 | 314291 |
| A3V206 | 314232 |
| A3V529 | 314232 |
| A3VCB4 | 314271 |
| A3VUG8 | 314260 |
| A3VYD1 | 314264 |
| A3W5D0 | 314264 |
| A3W8S6 | 314264 |
| A3WBB4 | 237727 |
| A3WVY4 | 314253 |
| A3XD47 | 314262 |
| A3XEW9 | 314262 |
| A3XKJ8 | 398720 |
| A3XZB3 | 314290 |
| A3Y578 | 314277 |
| A3Y8A4 | 314277 |
| A3YE11 | 314277 |
| A3YFI5 | 314277 |
| A3YIX7 | 360111 |
| A3YM52 | 360111 |
| A3YSL6 | 360108 |
| A3YWM7 | 69042  |
| A3Z412 | 221360 |
| A3ZE51 | 360112 |
| A3ZJ06 | 360110 |
| A3ZKB8 | 360110 |
| A3ZUS3 | 314230 |
| A3ZV89 | 314230 |
| A3ZZV5 | 314230 |
| A4ACJ4 | 314285 |
| A4AHI3 | 312284 |
| A4AHS6 | 312284 |
| A4ARE1 | 313603 |
| A4AV15 | 313603 |
| A4BHX5 | 314283 |
| A4BPN1 | 314278 |
| A4BRP0 | 314278 |
| A4C204 | 313594 |
| A4C7V1 | 87626  |
| A4CCE4 | 87626  |
| A4CYI2 | 59931  |
| A4E7M5 | 411903 |
| A4ECP0 | 411903 |
| A4EHQ9 | 391593 |
| A4EMG3 | 391593 |
| A4ENS4 | 388739 |
| A4EWP5 | 388739 |



|        |        |
|--------|--------|
| A4JKL4 | 269482 |
| A4KK27 | 395095 |
| A4LK20 | 425067 |
| A4LVD2 | 425067 |
| A4MG82 | 425067 |
| A4MXJ0 | 374927 |
| A4N4L0 | 375432 |
| A4N8J6 | 375177 |
| A4NG05 | 374928 |
| A4NLT4 | 374932 |
| A4NU55 | 374933 |
| A4NVH7 | 375063 |
| A4U1M6 | 55518  |
| A4U2H4 | 55518  |
| A4ZH45 | 326425 |
| A5DJY9 | 4929   |
| A5F699 | 345073 |
| A5J3T9 | 334802 |
| A5J7P2 | 334802 |
| A5KF36 | 398000 |
| A5KI83 | 398000 |
| A5KPW2 | 411460 |
| A5L605 | 391574 |
| A5LD17 | 406556 |
| A5LKR5 | 406557 |
| A5LW41 | 406558 |
| A5M3X4 | 406559 |
| A5MAU9 | 406560 |
| A5MEL3 | 406561 |
| A5MQJ4 | 406562 |
| A5MTN1 | 406563 |
| A5P744 | 161528 |
| A5TMI5 | 370895 |
| A5XKV7 | 334803 |
| A5XTM6 | 334803 |
| A5ZAT0 | 411463 |
| A5ZCG9 | 411901 |
| A5ZN98 | 411459 |
| A6A2I8 | 417398 |
| A6AB47 | 417397 |
| A6ARV9 | 410291 |
| A6AYY2 | 419109 |
| A6B040 | 419109 |
| A6BDM6 | 411462 |
| A6BHQ5 | 411462 |
| A6BN72 | 412420 |
| A6C7C0 | 344747 |
| A6CKS9 | 161544 |
| A6CZS2 | 391591 |
| A6DCI4 | 391592 |
| A6E1D4 | 391613 |
| A6E2Y6 | 391613 |
| A6E795 | 391596 |
| A6EST7 | 50743  |

|        |        |
|--------|--------|
| A6FEJ1 | 58051  |
| A6FT56 | 351016 |
| A6FYB9 | 391625 |
| A6GJN0 | 391625 |
| A6GV02 | 391597 |
| A6XY86 | 404974 |
| A6Y3V2 | 345074 |
| A7A7E6 | 411481 |
| A7AES8 | 411477 |
| A7JF57 | 430558 |
| A7JP23 | 442346 |
| A7JTU4 | 272629 |
| A7K0J5 | 150340 |
| A7LXQ1 | 411476 |
| A7V359 | 411479 |
| A7VCL5 | 411489 |
| A8E8R7 | 360118 |
| A8EIR4 | 360118 |
| A8H391 | 398579 |
| A8KJN4 | 331978 |
| A8KPI4 | 331978 |
| A8KTN1 | 331978 |
| A8PKT2 | 59196  |
| A8RF55 | 428127 |
| A8RLY9 | 411902 |
| A8S1Q9 | 411902 |
| A8S9N9 | 411485 |
| A8SFA5 | 411485 |
| A8STN4 | 411474 |
| A8T4X4 | 314289 |
| A8TK78 | 331869 |
| A8TLV0 | 331869 |
| A8TLW4 | 331869 |
| A8U3A2 | 331869 |
| A8UMX2 | 391603 |
| A8UTD8 | 392423 |
| A9AKX4 | 395019 |
| A9CW65 | 411684 |
| A9D0X1 | 411684 |
| A9DBF7 | 411684 |
| A9DSY7 | 391624 |
| A9DTL9 | 391624 |
| A9DWX7 | 391624 |
| A9E4Z0 | 391587 |
| A9ECC1 | 391587 |
| A9EEV2 | 391624 |
| A9EFY5 | 391624 |
| A9EIR3 | 383629 |
| A9ER44 | 383629 |
| A9FWL0 | 391619 |
| A9GAY4 | 391619 |
| A9H3K8 | 391595 |
| A9K2B6 | 412021 |
| A9K345 | 412021 |

|        |        |
|--------|--------|
| A9Z339 | 373665 |
| A9ZIP8 | 360117 |
| B0A1A7 | 404214 |
| B0A7C6 | 445973 |
| B0ACU3 | 445973 |
| B0AK64 | 486624 |
| B0AWN2 | 486624 |
| B0G383 | 411461 |
| B0GD00 | 404218 |
| B0GYZ7 | 404217 |
| B0H4L3 | 404216 |
| B0HHL2 | 404215 |
| B0HY28 | 360099 |
| B0M935 | 411490 |
| B0MFE5 | 411490 |
| B0MPQ8 | 428128 |
| B0NJJ8 | 411468 |
| B0NPT1 | 449673 |
| B0NXE4 | 411484 |
| B0PDA9 | 445972 |
| B0PYH7 | 486619 |
| B0Q499 | 486619 |
| B0QC30 | 486621 |
| B0QN01 | 486621 |
| B0QU22 | 456298 |
| B0UFW5 | 426117 |
| B0YE04 | 451804 |
| B1BDZ1 | 445337 |
| B1BIV8 | 445334 |
| B1BYB2 | 451755 |
| B1EJ32 | 502347 |
| B1ETN6 | 486623 |
| B1EZ83 | 486623 |
| B1F7T9 | 396596 |
| B1FAB9 | 396596 |
| B1FAF0 | 396596 |
| B1FBJ7 | 396596 |
| B1FCA2 | 396596 |
| B1FK30 | 396596 |
| B1FQE8 | 396596 |
| B1FVL2 | 396598 |
| B1G033 | 396598 |
| B1G5U5 | 396598 |
| B1G6J3 | 396598 |
| B1G9W2 | 396598 |
| B1G9X7 | 396598 |
| B1GE13 | 486620 |
| B1GKS7 | 486620 |
| B1HBZ0 | 320374 |
| B1HEW5 | 320374 |
| B1HGJ5 | 320374 |
| B1K2R5 | 406425 |
| B1KAT7 | 406425 |
| B1QA87 | 445335 |

|        |        |
|--------|--------|
| B1QLX9 | 445336 |
| B1QSR0 | 447214 |
| B1QWQ3 | 447214 |
| B1QXJ9 | 447214 |
| B1R337 | 451754 |
| B1RHP0 | 451756 |
| B1RL46 | 451757 |
| B1RZX9 | 453362 |
| B1S575 | 473819 |
| B1SEP8 | 471872 |
| B1SXE7 | 396597 |
| B1SXW5 | 396597 |
| B1SZ87 | 396597 |
| B1T3Y4 | 396597 |
| B1T569 | 396597 |
| B1T8F9 | 396597 |
| B1TAF4 | 396597 |
| B1UJC2 | 486622 |
| B1UR08 | 486622 |
| B1V7F8 | 488537 |
| B1X4L0 | 39717  |
| B1XVT2 | 452638 |
| B1Z2G0 | 398577 |
| B2DL35 | 453361 |
| B2DMZ5 | 453363 |
| B2DV69 | 453364 |
| B2E197 | 453365 |
| B2E5X9 | 453366 |
| B2EAC1 | 486409 |
| B2H202 | 331109 |
| B2H3J4 | 331109 |
| B2H5H9 | 331109 |
| B2JT32 | 391038 |
| B2MUB4 | 1927   |
| B2N3D7 | 344610 |
| B2NNP0 | 444451 |
| B2P3S5 | 444452 |
| B2PE96 | 444453 |
| B2PYK0 | 471874 |
| B2Q0U5 | 471874 |
| B2UCC4 | 402626 |
| B3A8X0 | 478004 |
| B3AMW7 | 478005 |
| B3B0F4 | 478006 |
| B3BIW2 | 478008 |
| B3BV53 | 478007 |
| B3C8T9 | 471870 |
| B3G1D0 | 287    |
| B3HF54 | 340184 |
| B3HUI0 | 340197 |
| B3HXE7 | 340197 |
| B3I872 | 340185 |
| B3II87 | 340186 |
| B3J111 | 405536 |

|        |        |
|--------|--------|
| B3JAA6 | 405536 |
| B3JJD8 | 470145 |
| B3Q4L3 | 491916 |
| B3WKD4 | 344601 |
| B3WYA3 | 358708 |
| B3XDN3 | 358709 |
| B3XRK5 | 349123 |
| B3YCM1 | 439842 |
| B3YEV5 | 439842 |
| B3YNY5 | 405917 |
| B3YTX0 | 405917 |
| B3Z5U0 | 451707 |
| B3ZKE9 | 451709 |
| B3ZMV9 | 451709 |
| B4A5P6 | 454168 |
| B4A9F8 | 454168 |
| B4AIZ8 | 536229 |
| B4ARI7 | 545422 |
| B4AWT9 | 497965 |
| B4BM42 | 495036 |
| B4CW35 | 497964 |
| B4CZA6 | 497964 |
| B4D5G4 | 497964 |
| B4ELJ8 | 216591 |
| B4EPL9 | 216591 |
| B4FLW2 | 4577   |
| B4RZW6 | 314275 |
| B4V207 | 465541 |
| B4VGT1 | 465541 |
| B4W7G2 | 391600 |
| B4W8Y7 | 391600 |
| B4WRF7 | 91464  |
| B5BX60 | 439846 |
| B5C2M7 | 439846 |
| B5CGS2 | 454165 |
| B5CTH5 | 471875 |
| B5CVS8 | 484018 |
| B5GIM4 | 465543 |
| B5GYM1 | 443255 |
| B5H1S3 | 443255 |
| B5HEV1 | 457429 |
| B5HF22 | 457429 |
| B5HH16 | 457429 |
| B5HK97 | 457429 |
| B5HR40 | 463191 |
| B5HRE3 | 463191 |
| B5HXJ9 | 463191 |
| B5I6V3 | 463191 |
| B5IJE1 | 180281 |
| B5ITB9 | 391623 |
| B5J1L6 | 391626 |
| B5J651 | 391626 |
| B5JGR0 | 382464 |
| B5JRZ9 | 391615 |

|        |        |
|--------|--------|
| B5JTB9 | 391615 |
| B5K0E3 | 391616 |
| B5KE45 | 391616 |
| B5MHP0 | 439847 |
| B5MI96 | 439847 |
| B5MWS9 | 440534 |
| B5MZE3 | 440534 |
| B5NFU1 | 454167 |
| B5NRG3 | 454231 |
| B5NSY7 | 454231 |
| B5P1Z5 | 454164 |
| B5P592 | 454164 |
| B5PA51 | 465518 |
| B5PR36 | 465516 |
| B5PTH2 | 465516 |
| B5Q1P1 | 465517 |
| B5Q7W2 | 465517 |
| B5QIT6 | 478547 |
| B5QP82 | 486408 |
| B5RVX5 | 305    |
| B5RZJ9 | 305    |
| B5S3R7 | 305    |
| B5S5X2 | 305    |
| B5S916 | 305    |
| B5SDP9 | 305    |
| B5SH52 | 564066 |
| B5SHD8 | 564066 |
| B5SHS7 | 564066 |
| B5SM69 | 564066 |
| B5UUN0 | 405533 |
| B5UWV6 | 405533 |
| B5V0N4 | 451708 |
| B5VCI4 | 451708 |
| B5WDG7 | 516466 |
| B5WE31 | 516466 |
| B5WKB8 | 516466 |
| B5WN74 | 516466 |
| B5WQ23 | 516466 |
| B5WS27 | 516466 |
| B6AKG1 | 419541 |
| B6AV07 | 314270 |
| B6AY12 | 314270 |
| B6B1V6 | 314270 |
| B6BCI7 | 439496 |
| B6BND2 | 439483 |
| B6BPE7 | 439493 |
| B6BS33 | 439493 |
| B6C693 | 473788 |
| B6FRG4 | 500632 |
| B6FY66 | 500633 |
| B6JA54 | 504832 |
| B6KFM9 | 508771 |
| B6QX39 | 439495 |
| B6R7G0 | 439495 |

|        |        |
|--------|--------|
| B6VZH1 | 483217 |
| B6W4A4 | 483217 |
| B6WR23 | 411464 |
| B6XF15 | 520999 |
| B6XVB1 | 566552 |
| B6Y6C0 | 569881 |
| B6YY53 | 439495 |
| B6ZWZ8 | 502346 |
| B7A769 | 498848 |
| B7AJW3 | 483216 |
| B7ALN9 | 483216 |
| B7B920 | 537006 |
| B7CIA2 | 557724 |
| B7CS30 | 557724 |
| B7D091 | 557724 |
| B7DM57 | 543302 |
| B7DS76 | 543302 |
| B7P667 | 6945   |
| B7QQY7 | 439497 |
| B7QYR3 | 439497 |
| B7R6L6 | 391606 |
| B7RE49 | 443254 |
| B7RLX2 | 391589 |
| B7RLX3 | 391589 |
| B7RMR3 | 391589 |
| B7RNB7 | 391589 |
| B7RTH2 | 247634 |
| B7WVE3 | 399795 |
| B7X5U7 | 399795 |
| B8IIG9 | 460265 |
| B8IIJ4 | 460265 |
| B8ISI9 | 460265 |
| B8ISK7 | 460265 |
| B8ITG9 | 460265 |
| B8IX71 | 460265 |
| B8IY15 | 460265 |
| B8K4H7 | 391586 |
| B8KE08 | 391586 |
| B8KF22 | 566466 |
| B8KQB5 | 565045 |
| B8L258 | 391601 |
| B8LB00 | 391601 |
| B8M4J1 | 441959 |
| B9AEG4 | 483214 |
| B9B0R3 | 513051 |
| B9B353 | 513051 |
| B9B5Z7 | 513051 |
| B9BLF1 | 513052 |
| B9BLW4 | 513052 |
| B9BP73 | 513052 |
| B9BUB6 | 513052 |
| B9BVX7 | 513052 |
| B9C5F6 | 513053 |
| B9C5X0 | 513053 |

|        |        |
|--------|--------|
| B9C9G3 | 513053 |
| B9CCW8 | 513053 |
| B9CEK7 | 513053 |
| B9CKR8 | 553184 |
| B9CP57 | 553184 |
| B9CRV3 | 553212 |
| B9D2Z5 | 553218 |
| B9GBB2 | 39947  |
| B9NJB5 | 3694   |
| B9NJT3 | 3694   |
| B9NLW1 | 467661 |
| B9NVW9 | 467661 |
| B9NXJ3 | 467661 |
| B9NY47 | 467661 |
| B9NYZ6 | 93058  |
| B9PPF1 | 5811   |
| B9QJ99 | 432359 |
| B9QUZ4 | 244592 |
| B9QYU8 | 244592 |
| B9R3Q0 | 244592 |
| B9R4E2 | 244592 |
| B9WTD3 | 286604 |
| B9XSF8 | 320771 |
| B9XT90 | 544405 |
| B9XY66 | 544406 |
| B9Z075 | 279714 |
| C0AQE1 | 471881 |
| C0AUB0 | 471881 |
| C0B3H1 | 471881 |
| C0BAM6 | 470146 |
| C0BHS2 | 487796 |
| C0BN46 | 487797 |
| C0BRF6 | 547043 |
| C0BRW0 | 547043 |
| C0BYQ8 | 553973 |
| C0BYZ0 | 553973 |
| C0C033 | 553973 |
| C0CGR1 | 476272 |
| C0CJV0 | 476272 |
| C0CV47 | 518636 |
| C0D119 | 518636 |
| C0D2X4 | 518636 |
| C0D4B5 | 518636 |
| C0DTL3 | 546274 |
| C0E2J0 | 566549 |
| C0EF08 | 537013 |
| C0EFH2 | 537013 |
| C0EZF7 | 411469 |
| C0F8S4 | 77037  |
| C0FNL6 | 622312 |
| C0G532 | 595497 |
| C0G9H7 | 595497 |
| C0G9Y2 | 595497 |
| C0GIY1 | 555088 |



|        |        |
|--------|--------|
| C0N9M4 | 637616 |
| C0VLX6 | 525244 |
| C0VUB8 | 548477 |
| C0VVI6 | 548477 |
| C0W1Z6 | 525245 |
| C0W2G3 | 525246 |
| C0WGE4 | 525260 |
| C0WKP2 | 525260 |
| C0WYW7 | 525325 |
| C0X4N2 | 491074 |
| C0XSG0 | 525263 |
| C0Y028 | 595498 |
| C0Y073 | 595498 |
| C0YCU3 | 595498 |
| C0YGJ3 | 595498 |
| C0YKU0 | 525257 |
| C0YSG8 | 525257 |
| C0Z0S5 | 585517 |
| C1HG39 | 469598 |
| C1HNX4 | 469598 |
| C1HRE8 | 469598 |
| C1HS33 | 469598 |
| C1I601 | 457396 |
| C1M7V6 | 469595 |
| C1MC25 | 469595 |
| C1MFW1 | 469595 |
| C1V4A0 | 469382 |
| C2BNZ8 | 525264 |
| C2C225 | 525367 |
| C2CB94 | 592313 |
| C2CNY6 | 525268 |
| C2DDP5 | 525278 |
| C2DLG5 | 525281 |
| C2DV56 | 525281 |
| C2E692 | 525330 |
| C2E8G3 | 525362 |
| C2EML3 | 525365 |
| C2ESS4 | 525366 |
| C2EWS6 | 491077 |
| C2F3S4 | 548485 |
| C2FAU8 | 525337 |
| C2FHV1 | 525338 |
| C2FK34 | 525338 |
| C2G407 | 525372 |
| C2GC85 | 548473 |
| C2GIA0 | 548478 |
| C2GJT4 | 548478 |
| C2GQH5 | 525341 |
| C2GUU8 | 548480 |
| C2H5V1 | 525271 |
| C2HNU7 | 525306 |
| C2HUK8 | 593585 |
| C2I6X3 | 593586 |
| C2IIN0 | 593589 |

|        |        |
|--------|--------|
| C2IR98 | 593590 |
| C2JG78 | 593587 |
| C2JJ22 | 491075 |
| C2K0T9 | 525361 |
| C2KC71 | 491076 |
| C2KKV3 | 586220 |
| C2KQM6 | 585199 |
| C2KVM1 | 585501 |
| C2LEQ3 | 525369 |
| C2LG14 | 525369 |
| C2LH50 | 525369 |
| C2LTG1 | 596322 |
| C2M0I2 | 629742 |
| C2M8Q9 | 553178 |
| C2MLU8 | 526973 |
| C2MPC9 | 526973 |
| C2N218 | 526980 |
| C2N4U0 | 526980 |
| C2NIT2 | 526970 |
| C2NLK2 | 526970 |
| C2NZP6 | 526967 |
| C2P2E3 | 526967 |
| C2PG44 | 526971 |
| C2PIW4 | 526971 |
| C2PW69 | 526972 |
| C2PZE9 | 526972 |
| C2QCX1 | 526968 |
| C2QFL3 | 526968 |
| C2QU71 | 526977 |
| C2QWX0 | 526977 |
| C2R9A1 | 526969 |
| C2RBZ3 | 526969 |
| C2RP57 | 526974 |
| C2RRV2 | 526974 |
| C2S4I3 | 526975 |
| C2S7J6 | 526975 |
| C2SLC1 | 526976 |
| C2SNU8 | 526976 |
| C2T260 | 526978 |
| C2T4Q2 | 526978 |
| C2TH89 | 526979 |
| C2TKB9 | 526979 |
| C2TYP0 | 526981 |
| C2U135 | 526981 |
| C2UEZ9 | 526982 |
| C2UHR6 | 526982 |
| C2UWH6 | 526983 |
| C2UZ38 | 526983 |
| C2VD14 | 526984 |
| C2VFL9 | 526984 |
| C2VUW6 | 526985 |
| C2VXL0 | 526985 |
| C2WAU3 | 526986 |
| C2WDH4 | 526986 |

|        |        |
|--------|--------|
| C2WFB7 | 526986 |
| C2WFN4 | 526986 |
| C2WNL5 | 526987 |
| C2WRH7 | 526987 |
| C2XCP4 | 526989 |
| C2XFF7 | 526989 |
| C2XV81 | 526990 |
| C2XXQ9 | 526990 |
| C2YBK8 | 526991 |
| C2YE49 | 526991 |
| C2YSQ1 | 526992 |
| C2YV81 | 526992 |
| C2Z910 | 526993 |
| C2ZBI8 | 526993 |
| C2ZQQ4 | 526994 |
| C2ZT21 | 526994 |
| C3A711 | 526997 |
| C3A9I8 | 526997 |
| C3AM36 | 526998 |
| C3AVI7 | 526998 |
| C3B4C2 | 526999 |
| C3BDU2 | 526999 |
| C3BL56 | 527000 |
| C3BNI6 | 527000 |
| C3C3H8 | 527024 |
| C3C6C2 | 527024 |
| C3CJU3 | 527021 |
| C3CME6 | 527021 |
| C3D2U6 | 527025 |
| C3D5H8 | 527025 |
| C3DKW3 | 527026 |
| C3DNJ9 | 527026 |
| C3E4I5 | 527027 |
| C3E741 | 527027 |
| C3ELS9 | 527023 |
| C3EPB0 | 527023 |
| C3F2R5 | 527022 |
| C3F5R1 | 527022 |
| C3FLB0 | 527031 |
| C3FW65 | 527031 |
| C3G418 | 527032 |
| C3G6U9 | 527032 |
| C3GK03 | 527029 |
| C3GMQ3 | 527029 |
| C3H219 | 527030 |
| C3H4W0 | 527030 |
| C3HJM9 | 527028 |
| C3HMG1 | 527028 |
| C3I1W2 | 527019 |
| C3I4R8 | 527019 |
| C3IKF9 | 527020 |
| C3IN05 | 527020 |
| C3JIX1 | 596309 |
| C3JKE1 | 596309 |

|        |        |
|--------|--------|
| C3JV64 | 596309 |
| C3JX61 | 596309 |
| C3M8R5 | 394    |
| C3PYN1 | 457395 |
| C3Q2D9 | 457395 |
| C3QKN0 | 556258 |
| C3R413 | 469590 |
| C3R4Z1 | 556260 |
| C3RAU6 | 556260 |
| C3T0C7 | 562    |
| C3WAI9 | 469616 |
| C3WBV1 | 469616 |
| C3X4S5 | 556268 |
| C3XAX8 | 556269 |
| C3XHS0 | 613026 |
| C3XNE8 | 556267 |
| C4AMM2 | 320390 |
| C4AQ56 | 320390 |
| C4EYX7 | 521005 |
| C4F596 | 521004 |
| C4FBG3 | 521003 |
| C4FDZ4 | 518635 |
| C4FQU2 | 546273 |
| C4G894 | 626523 |
| C4GRS9 | 377628 |
| C4H8W5 | 547047 |
| C4HL61 | 547046 |
| C4HXA4 | 545431 |
| C4I7K0 | 536230 |
| C4ID44 | 632245 |
| C4IIZ4 | 632245 |
| C4IN57 | 632245 |
| C4IPU6 | 641140 |
| C4IW29 | 641140 |
| C4IWF8 | 641140 |
| C4PML7 | 672161 |
| C4R7K9 | 644223 |
| C4RD90 | 219305 |
| C4S006 | 349968 |
| C4SGQ6 | 349967 |
| C4SMZ5 | 349966 |
| C4SYW3 | 349965 |
| C4TXU6 | 527012 |
| C4UDS5 | 527002 |
| C4UMN5 | 527005 |
| C4UX83 | 527004 |
| C4V3M9 | 638302 |
| C4VF92 | 553209 |
| C4WAV5 | 596319 |
| C4WE40 | 641118 |
| C4WI29 | 641118 |
| C4WLR1 | 641118 |
| C4WMW4 | 641118 |
| C4Y315 | 306902 |

|        |        |
|--------|--------|
| C4YZ54 | 444612 |
| C5AGF9 | 626418 |
| C5E841 | 537937 |
| C5ELY3 | 457421 |
| C5F0V4 | 537972 |
| C5F625 | 537973 |
| C5F759 | 537973 |
| C5N5F5 | 450394 |
| C5NB39 | 436115 |
| C5NLH6 | 436115 |
| C5PQA8 | 525373 |
| C5Q054 | 548474 |
| C5Q930 | 525374 |
| C5QJ26 | 548475 |
| C5QSC9 | 525378 |
| C5QX05 | 525376 |
| C5RGJ0 | 573061 |
| C5RQP4 | 573061 |
| C5RTN8 | 573062 |
| C5S2F4 | 637911 |
| C5SLY5 | 573065 |
| C5T3W8 | 573060 |
| C5TEI4 | 555217 |
| C5TII7 | 555217 |
| C5UBF4 | 509193 |
| C5URK8 | 536233 |
| C5UZK0 | 536233 |
| C5VCP3 | 553207 |
| C5VKH9 | 553174 |
| C5VTQ4 | 592027 |
| C5W7I2 | 511693 |
| C5ZAJ3 | 357347 |
| C5ZIB6 | 357347 |
| C5ZMD4 | 357347 |
| C5ZYB2 | 537970 |
| C6BDT2 | 428406 |
| C6EKN3 | 469008 |
| C6I8P2 | 457392 |
| C6IG30 | 469586 |
| C6IJM9 | 469586 |
| C6IW19 | 621372 |
| C6JE56 | 457412 |
| C6JJI2 | 469618 |
| C6JNE5 | 469618 |
| C6M9W2 | 547045 |
| C6MVY6 | 443143 |
| C6N3Z7 | 658187 |
| C6PQF9 | 536227 |
| C6QAV1 | 582899 |
| C6R2H4 | 553201 |
| C6RAG4 | 553206 |
| C6RF87 | 553219 |
| C6RXD8 | 661513 |
| C6TRR9 | 320371 |

|        |        |
|--------|--------|
| C6TVH2 | 320371 |
| C6U7Q0 | 320371 |
| C6YDJ4 | 345072 |
| C6YTA2 | 539329 |
| C6Z2K3 | 457394 |
| C6Z7M4 | 457394 |
| C7CTQ7 | 565636 |
| C7D4D7 | 565637 |
| C7D5L6 | 633131 |
| C7D606 | 633131 |
| C7GAJ1 | 536231 |
| C7H7M9 | 411483 |
| C7HHP4 | 572545 |
| C7HL88 | 588857 |
| C7IFT8 | 588581 |
| C7IGT3 | 588581 |
| C7ILN9 | 588581 |
| C7IQ79 | 589861 |
| C7JMQ9 | 634453 |
| C7JWX5 | 634454 |
| C7K769 | 634455 |
| C7KGD8 | 634456 |
| C7KQQ2 | 634457 |
| C7L017 | 634458 |
| C7L2B6 | 634459 |
| C7S9X0 | 562    |
| C7U9W9 | 565638 |
| C7UIL1 | 565642 |
| C7UQS1 | 565641 |
| C7UUE4 | 565650 |
| C7V4U9 | 565640 |
| C7VBV0 | 565644 |
| C7VP77 | 565646 |
| C7VWU5 | 565649 |
| C7W3H3 | 565647 |
| C7W6R4 | 565648 |
| C7WJU6 | 565643 |
| C7WNB1 | 565651 |
| C7X2S3 | 565645 |
| C7X796 | 563193 |
| C7XGG2 | 575595 |
| C7XU15 | 575594 |
| C7Y2G6 | 575596 |
| C7Y9W5 | 565639 |
| C7Z3C3 | 660122 |
| C7ZX03 | 585143 |
| C8A3U0 | 585145 |
| C8ABR9 | 585146 |
| C8AKS9 | 585153 |
| C8ART5 | 585158 |
| C8JTE7 | 393124 |
| C8K0L5 | 393125 |
| C8K8R6 | 393128 |
| C8KPG9 | 452948 |

|        |        |
|--------|--------|
| C8KW83 | 455227 |
| C8KXB4 | 591023 |
| C8L4M4 | 553565 |
| C8LCL6 | 553567 |
| C8LK18 | 553568 |
| C8LVE7 | 553571 |
| C8M342 | 553573 |
| C8M624 | 553581 |
| C8ME59 | 553583 |
| C8MKP2 | 553588 |
| C8MVR4 | 553592 |
| C8N5H1 | 553596 |
| C8NA86 | 638300 |
| C8NPH1 | 196164 |
| C8NU12 | 585529 |
| C8P7R0 | 525309 |
| C8PFV3 | 553220 |
| C8PXT2 | 553217 |
| C8Q4E6 | 592316 |
| C8Q9D6 | 592316 |
| C8Q9X8 | 592316 |
| C8QAG6 | 592316 |
| C8QBH3 | 592316 |
| C8QFB9 | 592316 |
| C8QFR5 | 592316 |
| C8RTN7 | 525262 |
| C8S4E5 | 371731 |
| C8SMC7 | 536019 |
| C8SNR4 | 536019 |
| C8SU66 | 536019 |
| C8T3U9 | 667127 |
| C8T7J2 | 667127 |
| C8T9Y7 | 667127 |
| C9A3J6 | 565653 |
| C9CSV2 | 644076 |
| C9CTU5 | 644076 |
| C9CY43 | 644076 |
| C9D1N4 | 644076 |
| C9D1U1 | 644076 |
| C9KK83 | 500635 |
| C9KXD0 | 483215 |
| C9L415 | 537007 |
| C9LHF9 | 626522 |
| C9LRX0 | 546271 |
| C9M0D4 | 585520 |
| C9M5X3 | 645512 |
| C9MDU0 | 656913 |
| C9MIA8 | 656912 |
| C9MQE7 | 649761 |
| C9MWZ1 | 634994 |
| C9NF41 | 591167 |
| C9NF51 | 591167 |
| C9NGX2 | 591167 |
| C9NH48 | 591167 |

|        |        |
|--------|--------|
| C9NL43 | 591167 |
| C9NT73 | 675814 |
| C9NZA0 | 675814 |
| C9P393 | 675813 |
| C9PB15 | 675811 |
| C9PMD2 | 667128 |
| C9PZI9 | 619693 |
| C9Q202 | 675810 |
| C9QEL3 | 675816 |
| C9QLI4 | 675816 |
| C9QRC9 | 536056 |
| C9QT20 | 536056 |
| C9ST72 | 526221 |
| C9T077 | 520459 |
| C9TOP2 | 520459 |
| C9T5A6 | 520459 |
| C9T9H4 | 520460 |
| C9T9Y6 | 520460 |
| C9TFI7 | 520460 |
| C9TKI1 | 520463 |
| C9TKX1 | 520463 |
| C9TPD7 | 520463 |
| C9TUC5 | 520461 |
| C9U0P8 | 520461 |
| C9U142 | 520461 |
| C9U2N9 | 520454 |
| C9UA93 | 520454 |
| C9UAN6 | 520454 |
| C9UBV8 | 520452 |
| C9UH40 | 520452 |
| C9UJV5 | 520452 |
| C9UL34 | 520451 |
| C9UT01 | 520451 |
| C9UTE7 | 520451 |
| C9UX41 | 520450 |
| C9V2U5 | 520450 |
| C9V391 | 520450 |
| C9V676 | 520456 |
| C9V6N2 | 520456 |
| C9V9I0 | 520456 |
| C9VEC3 | 520457 |
| C9VET0 | 520457 |
| C9VHV9 | 520457 |
| C9VQC4 | 520455 |
| C9VQM4 | 520455 |
| C9VRT0 | 520455 |
| C9X004 | 604162 |
| C9X6V5 | 568708 |
| C9XC11 | 568708 |
| C9Y6K4 | 667019 |
| C9YCK6 | 667019 |
| C9YGB2 | 667019 |
| D0AUB2 | 575591 |
| D0AUP1 | 575591 |



|        |        |
|--------|--------|
| D0AX20 | 575591 |
| D0B282 | 224914 |
| D0B6K4 | 224914 |
| D0BC98 | 520488 |
| D0BHB8 | 520488 |
| D0BHR7 | 520488 |
| D0C1R3 | 575564 |
| D0C1U3 | 575564 |
| D0C8L8 | 575584 |
| D0C9Y4 | 575584 |
| D0CB82 | 575584 |
| D0CM56 | 166314 |
| D0CP12 | 644107 |
| D0CUC6 | 644107 |
| D0D6K7 | 501479 |
| D0DAY5 | 501479 |
| D0DEW8 | 575597 |
| D0DRF3 | 575599 |
| D0GBG0 | 520465 |
| D0GBU8 | 520465 |
| D0GGB2 | 520465 |
| D0GLI5 | 596323 |
| D0GRY8 | 675806 |
| D0H2N3 | 675807 |
| D0HJM0 | 675820 |
| D0HLU7 | 675808 |
| D0IIF6 | 675809 |
| D0ICG7 | 675812 |
| D0ILG5 | 675815 |
| D0IRT9 | 290847 |
| D0JFN3 | 637382 |
| D0JPQ4 | 637385 |
| D0JYX6 | 684950 |
| D0KQP5 | 555311 |
| D0KUS0 | 555311 |
| D0N460 | 403677 |
| D0P5V8 | 520489 |
| D0P6A1 | 520489 |
| D0PBX9 | 520489 |
| D0PEV4 | 520487 |
| D0PFB8 | 520487 |
| D0PJW9 | 520487 |
| D0RD86 | 437701 |
| D0RDP8 | 437701 |
| D0RGG8 | 437701 |
| D0RNT5 | 684719 |
| D0RUY2 | 469609 |
| D0S0J1 | 575585 |
| D0S5W6 | 575585 |
| D0SFH3 | 575586 |
| D0SYA0 | 575588 |
| D0T9B5 | 469589 |
| D0TPY0 | 469588 |
| D0WKMO | 649743 |

|        |        |
|--------|--------|
| D0X0V3 | 674977 |
| D0X3W7 | 674977 |
| D0X8I1 | 673519 |
| D0XD03 | 673519 |
| D0XKL1 | 633149 |
| D0YQT8 | 596328 |
| D0YWF7 | 675817 |
| D0ZJG6 | 588858 |
| D0ZRQ3 | 588858 |
| D0ZYW8 | 406984 |
| D1CX18 | 520449 |
| D1CZZ0 | 520449 |
| D1D1N9 | 520449 |
| D1DNL0 | 528356 |
| D1EF03 | 528360 |
| D1EIR1 | 520462 |
| D1EJ51 | 520462 |
| D1ERE2 | 520462 |
| D1ETF8 | 520464 |
| D1ETU5 | 520464 |
| D1EY64 | 520464 |
| D1F4B0 | 520466 |
| D1F4Q2 | 520466 |
| D1F7R4 | 520466 |
| D1FCX9 | 520458 |
| D1FDD4 | 520458 |
| D1FEI5 | 520458 |
| D1GU92 | 663951 |
| D1J9N6 | 115547 |
| D1JB00 | 115547 |
| D1JNN6 | 469587 |
| D1JXU3 | 457391 |
| D1K4Q6 | 457391 |
| D1KCJ7 | 655186 |
| D1NIR9 | 492476 |
| D1NTB9 | 561180 |
| D1NX47 | 561180 |
| D1P519 | 500637 |
| D1P9U6 | 537011 |
| D1PKT2 | 411471 |
| D1PYS3 | 585502 |
| D1QDL6 | 553594 |
| D1QLX6 | 553601 |
| D1QUX6 | 649760 |
| D1QX77 | 553574 |
| D1RPE5 | 682634 |
| D1RQF2 | 682634 |
| D1RRN9 | 682634 |
| D1RYG4 | 682634 |
| D1RYZ9 | 682634 |
| D1SAA0 | 644283 |
| D1SDC5 | 644283 |
| D1SR75 | 643561 |
| D1SUI8 | 643561 |

|        |        |
|--------|--------|
| D1SUT1 | 643561 |
| D1SXY1 | 643561 |
| D1TUX2 | 687916 |
| D1UCQ2 | 640510 |
| D1UCR7 | 640510 |
| D1UIC4 | 640510 |
| D1UJD7 | 640510 |
| D1USN3 | 640510 |
| D1UTB2 | 640510 |
| D1VB94 | 298654 |
| D1VX50 | 679189 |
| D1W4U4 | 679190 |
| D1WNM6 | 596317 |
| D1WRH7 | 649189 |
| D1WW05 | 649189 |
| D1WX68 | 649189 |
| D1X0Q7 | 649189 |
| D1X0R6 | 649189 |
| D1X910 | 649189 |
| D1XFW4 | 647653 |
| D1XFX9 | 647653 |
| D1XNX6 | 647653 |
| D1XNY7 | 647653 |
| D1XUY9 | 647653 |
| D1XYB8 | 553171 |
| D1YBB7 | 679194 |
| D1YDX4 | 679194 |
| D1YR94 | 686660 |
| D2EQY3 | 563037 |
| D2F2G6 | 585543 |
| D2F6V3 | 585149 |
| D2FCZ9 | 585151 |
| D2FLT0 | 585152 |
| D2FV84 | 585159 |
| D2G1Q6 | 585160 |
| D2GAK5 | 585161 |
| D2GG36 | 585148 |
| D2GRE5 | 585150 |
| D2L037 | 644968 |
| D2LCQ4 | 648757 |
| D2M6M5 | 652103 |
| D2M9A2 | 652103 |
| D2MCT0 | 652103 |
| D2MDM1 | 652103 |
| D2MRX7 | 683082 |
| D2MVK7 | 683082 |
| D2MXU0 | 683083 |
| D2N722 | 523796 |
| D2NB24 | 431946 |
| D2NF47 | 431946 |
| D2NGW4 | 431946 |
| D2NL47 | 431946 |
| D2T2R3 | 644651 |
| D2T6K7 | 644651 |

|        |        |
|--------|--------|
| D2T6S6 | 644651 |
| D2U224 | 638    |
| D2UM16 | 585155 |
| D2US13 | 585147 |
| D2YFK7 | 671074 |
| D2YN29 | 671076 |
| D2ZA74 | 500639 |
| D2ZAS9 | 500639 |
| D2ZFA0 | 500639 |
| D2ZQ43 | 521002 |
| D2ZSD4 | 546266 |
| D3AD93 | 566550 |
| D3AGU3 | 566550 |
| D3AI99 | 566550 |
| D3AN10 | 566550 |
| D3C5L7 | 648999 |
| D3CGG7 | 648999 |
| D3CGL5 | 648999 |
| D3D7A1 | 102897 |
| D3EWD7 | 703339 |
| D3FKV9 | 567106 |
| D3FM27 | 567106 |
| D3H2X1 | 216592 |
| D3HVY4 | 575611 |
| D3I4B2 | 575612 |
| D3IAH5 | 575614 |
| D3IH03 | 575615 |
| D3KQ00 | 393121 |
| D3L182 | 592015 |
| D3L8Q6 | 655225 |
| D3LMY6 | 596312 |
| D3LPF4 | 596312 |
| D3M8A9 | 656024 |
| D3MBB2 | 679195 |
| D3MEB4 | 679195 |
| D3MM18 | 686659 |
| D3MM67 | 686659 |
| D3MXG3 | 547146 |
| D3N143 | 640512 |
| D3N1H9 | 640512 |
| D3N4E0 | 640512 |
| D3N9Z3 | 640512 |
| D3NKY6 | 663278 |
| D3R6I6 | 552531 |
| D3UUH5 | 634464 |
| D4B6U7 | 500640 |
| D4B9P1 | 500640 |
| D4BA44 | 500640 |
| D4BDK1 | 500640 |
| D4BDK7 | 500640 |
| D4BEF1 | 500640 |
| D4BGK5 | 500640 |
| D4BLW2 | 518634 |
| D4BMW3 | 518634 |

|        |        |
|--------|--------|
| D4BQE4 | 518634 |
| D4BRN9 | 518634 |
| D4BT26 | 521000 |
| D4C3E3 | 521000 |
| D4CDN2 | 411486 |
| D4DTJ0 | 546263 |
| D4E351 | 667129 |
| D4E489 | 667129 |
| D4E6U5 | 667129 |
| D4EK55 | 699185 |
| D4EUB8 | 699186 |
| D4F3A3 | 500638 |
| D4FGR2 | 679188 |
| D4FIV0 | 525375 |
| D4FSR3 | 655813 |
| D4IXD8 | 657324 |
| D4IZM0 | 657324 |
| D4J4Q0 | 717962 |
| D4JC29 | 717962 |
| D4JIW4 | 657317 |
| D4JL1  | 657317 |
| D4JM28 | 657317 |
| D4JSV1 | 657319 |
| D4K4E3 | 718252 |
| D4K6B9 | 657322 |
| D4KAX2 | 657322 |
| D4KIB7 | 657316 |
| D4KNP2 | 657315 |
| D4KVB4 | 718255 |
| D4LEM2 | 213810 |
| D4LKN1 | 657323 |
| D4LQA0 | 657314 |
| D4LRH7 | 657314 |
| D4M2V1 | 657313 |
| D4MH88 | 657310 |
| D4MMF7 | 717961 |
| D4MPE8 | 245012 |
| D4MSX6 | 245012 |
| D4MZG2 | 245018 |
| D4PK83 | 393117 |
| D4PTT6 | 393131 |
| D4Q520 | 401650 |
| D4S162 | 511680 |
| D4S4K8 | 585503 |
| D4SCG6 | 585531 |
| D4SVX7 | 427081 |
| D4SX75 | 427081 |
| D4T7N5 | 427082 |
| D4TAZ9 | 427082 |
| D4THW7 | 533240 |
| D4TUI7 | 533247 |
| D4UAC7 | 553590 |
| D4UEW3 | 553580 |
| D4USQ6 | 246199 |

|        |        |
|--------|--------|
| D4V1I7 | 791166 |
| D4V7F0 | 702446 |
| D4V9C5 | 702446 |
| D4W5Y0 | 702450 |
| D4WHH9 | 702443 |
| D4WQI7 | 702444 |
| D4X3Q8 | 742159 |
| D4X524 | 742159 |
| D4X7E6 | 742159 |
| D4XFS7 | 742159 |
| D4XKS0 | 707232 |
| D4XZ18 | 552811 |
| D4YHE6 | 655812 |
| D4YRI1 | 585524 |
| D4ZX95 | 696747 |
| D5AH50 | 423211 |
| D5AX19 | 449216 |
| D5CWS0 | 714962 |
| D5CXB5 | 714962 |
| D5D333 | 714962 |
| D5H844 | 761659 |
| D5H943 | 761659 |
| D5HHC8 | 751585 |
| D5MIK9 | 671143 |
| D5N760 | 243261 |
| D5N823 | 243261 |
| D5NCB4 | 243261 |
| D5NED2 | 243261 |
| D5NFC0 | 243261 |
| D5NUE5 | 649754 |
| D5NXN3 | 649754 |
| D5NZ89 | 649754 |
| D5NZS8 | 649754 |
| D5PGP9 | 525368 |
| D5PI22 | 525368 |
| D5PJJ1 | 525368 |
| D5PMP8 | 525370 |
| D5PZ19 | 525370 |
| D5Q7R2 | 525259 |
| D5Q7R4 | 525259 |
| D5Q8F2 | 525259 |
| D5Q9T9 | 525259 |
| D5QEC5 | 714995 |
| D5QFJ4 | 714995 |
| D5QFT4 | 714995 |
| D5QL76 | 595536 |
| D5QW73 | 595536 |
| D5RB61 | 525283 |
| D5RJU6 | 525371 |
| D5RMX3 | 525371 |
| D5RPW9 | 525371 |
| D5RS03 | 525371 |
| D5RV08 | 525258 |
| D5SON8 | 525258 |

|        |        |
|--------|--------|
| D5S0P0 | 525258 |
| D5S1S2 | 525258 |
| D5SCL8 | 762948 |
| D5SPZ8 | 521674 |
| D5TIE8 | 573236 |
| D5VSK6 | 573063 |
| D5VVU8 | 758678 |
| D5XX86 | 515617 |
| D5Y7M9 | 520141 |
| D5YI53 | 520140 |
| D5YUM5 | 515616 |
| D5Z6T2 | 537209 |
| D5ZJT3 | 537210 |
| D5ZNJ8 | 566461 |
| D5ZNL7 | 566461 |
| D5ZT51 | 566461 |
| D6AM04 | 457431 |
| D6AQ53 | 457431 |
| D6AS43 | 457431 |
| D6AU82 | 457431 |
| D6BA16 | 457425 |
| D6CKX1 | 426114 |
| D6D6S6 | 657309 |
| D6D9P4 | 722911 |
| D6DH14 | 717608 |
| D6DNH5 | 718254 |
| D6DS90 | 718254 |
| D6E154 | 657318 |
| D6E3Z6 | 657318 |
| D6E6Q4 | 657308 |
| D6E9R8 | 657308 |
| D6EJK7 | 457428 |
| D6ELA7 | 457428 |
| D6ELD1 | 457428 |
| D6EQ51 | 457428 |
| D6FJX7 | 611303 |
| D6FNF9 | 611304 |
| D6GB51 | 469608 |
| D6GC73 | 469608 |
| D6GDH9 | 469608 |
| D6GEP3 | 469608 |
| D6GLK4 | 469608 |
| D6GMZ2 | 469608 |
| D6GYT4 | 585156 |
| D6H8H7 | 528348 |
| D6HGP5 | 585144 |
| D6HJH1 | 552396 |
| D6HZP2 | 550672 |
| D6IAA5 | 550676 |
| D6IJD8 | 656380 |
| D6ISJ4 | 656380 |
| D6J058 | 585157 |
| D6JCT2 | 550677 |
| D6JME6 | 528351 |

|        |        |
|--------|--------|
| D6JRZ5 | 575565 |
| D6JUZ1 | 575565 |
| D6K2V4 | 645465 |
| D6KAD4 | 645465 |
| D6KHS8 | 457416 |
| D6KMY7 | 450749 |
| D6KUZ1 | 641146 |
| D6L160 | 641147 |
| D6LLS7 | 520448 |
| D6LS38 | 520448 |
| D6LTL8 | 520448 |
| D6LXN9 | 585154 |
| D6RZB8 | 525284 |
| D6S0F5 | 525284 |
| D6SH16 | 548470 |
| D6SM00 | 555779 |
| D6T4M7 | 553577 |
| D6UAM3 | 762962 |
| D6UHI6 | 585535 |
| D6VA00 | 666684 |
| D6VAA2 | 666684 |
| D6VCX4 | 596153 |
| D6VFA7 | 596153 |
| D6VK15 | 596153 |
| D6XP48 | 637913 |
| D6XUK6 | 439292 |
| D6YDC5 | 707184 |
| D6YFG8 | 707185 |
| D6YI34 | 707186 |
| D6YKQ9 | 707187 |
| D6YMH3 | 707183 |
| D6YY45 | 718219 |
| D7ADC8 | 663917 |
| D7C0P5 | 749414 |
| D7C6Q4 | 749414 |
| D7CAC5 | 749414 |
| D7CGU8 | 749414 |
| D7DDI3 | 759363 |
| D7DGV8 | 759364 |
| D7EV93 | 515615 |
| D7H2J1 | 520453 |
| D7H4M6 | 520453 |
| D7H508 | 520453 |
| D7HLP4 | 412967 |
| D7HXK7 | 693985 |
| D7IDG5 | 469585 |
| D7IEN5 | 469585 |
| D7IQ94 | 469592 |
| D7JAG8 | 585544 |
| D7JIX3 | 656379 |
| D7JRP4 | 656379 |
| D7JZU4 | 457390 |
| D7MYX6 | 641149 |
| D7N9B9 | 563008 |



|        |        |
|--------|--------|
| O85839 | 48935  |
| Q02J95 | 208963 |
| Q05UM7 | 221359 |
| Q062N4 | 313625 |
| Q07607 | 382    |
| Q09C54 | 378806 |
| Q0ASZ7 | 394221 |
| Q0B3G8 | 339670 |
| Q0B5V1 | 339670 |
| Q0BA71 | 339670 |
| Q0CZA4 | 341663 |
| Q0EYP1 | 314345 |
| Q0FEF6 | 367336 |
| Q0FHL3 | 314265 |
| Q0FKR4 | 314265 |
| Q0FMG1 | 314265 |
| Q0FPQ1 | 314265 |
| Q0FSQ4 | 314265 |
| Q0FT89 | 314265 |
| Q0FX00 | 314265 |
| Q0G1X1 | 314231 |
| Q0G2A1 | 314231 |
| Q0G4M0 | 314231 |
| Q0G5L1 | 314231 |
| Q0YU46 | 377431 |
| Q11B87 | 266779 |
| Q12FP7 | 296591 |
| Q1BG19 | 331271 |
| Q1BGK9 | 331271 |
| Q1BJW5 | 331271 |
| Q1GKD3 | 292414 |
| Q1JUQ0 | 192    |
| Q1K3A8 | 281689 |
| Q1NP13 | 262489 |
| Q1NRT8 | 262489 |
| Q1PYF4 | 174633 |
| Q1UZB4 | 314261 |
| Q1V0T0 | 314261 |
| Q1VDQ0 | 314288 |
| Q1VEU7 | 314288 |
| Q1VSL1 | 313595 |
| Q1VV29 | 313595 |
| Q1YEJ2 | 287752 |
| Q1YEZ7 | 287752 |
| Q1YHC4 | 287752 |
| Q1YHR3 | 287752 |
| Q1YIT8 | 287752 |
| Q1YKR5 | 287752 |
| Q1YTD8 | 314287 |
| Q1YYP2 | 314280 |
| Q1ZJN8 | 314292 |
| Q26BR2 | 156586 |
| Q28WG2 | 290400 |
| Q2C1A4 | 121723 |

|        |        |
|--------|--------|
| Q2CDL0 | 314256 |
| Q2CGC0 | 314256 |
| Q2CII8 | 314256 |
| Q2RSM9 | 269796 |
| Q2T4S5 | 271848 |
| Q39BK2 | 269483 |
| Q3EJB0 | 339854 |
| Q3KDV6 | 205922 |
| Q3R3L8 | 155920 |
| Q3R810 | 155920 |
| Q3RCS7 | 155919 |
| Q40KG7 | 332415 |
| Q4C2C6 | 165597 |
| Q4E8D5 | 77038  |
| Q4EIP4 | 267410 |
| Q4ETU1 | 267409 |
| Q4HE01 | 306254 |
| Q4HIA4 | 306254 |
| Q4HQN7 | 306264 |
| Q4JMV0 | 332980 |
| Q4MK96 | 269801 |
| Q4MP68 | 269801 |
| Q546B6 | 1718   |
| Q54A52 | 1360   |
| Q573K6 | 77133  |
| Q5B9Q2 | 162425 |
| Q5J5B7 | 615    |
| Q5LKY5 | 89184  |
| Q5NVU8 | 115547 |
| Q5PXM6 | 666    |
| Q5UCH7 | 29486  |
| Q5XQ83 | 285359 |
| Q647W4 | 285356 |
| Q648S7 | 285368 |
| Q64BW6 | 285387 |
| Q64D46 | 285362 |
| Q6BQZ9 | 4959   |
| Q6W269 | 394    |
| Q732S5 | 222523 |
| Q7PBV3 | 272951 |
| Q7VVK3 | 520    |
| Q7W621 | 519    |
| Q7WHY6 | 518    |
| Q7X387 | 562    |
| Q89Q18 | 375    |
| Q8H725 | 4787   |
| Q8KJM5 | 381    |
| Q8RKE9 | 28223  |
| Q8YB94 | 29459  |
| Q93IH0 | 630    |
| Q93IK7 | 161725 |
| Q977P8 | 2265   |
| Q9AKJ9 | 783    |
| Q9AKQ3 | 33991  |

| <b>dihydrodipicolinate reductase</b> |             | <b>LL-diaminopimelate aminotransferase</b> |             | <b>diaminopimelate epimerase</b> |             |
|--------------------------------------|-------------|--------------------------------------------|-------------|----------------------------------|-------------|
| <b>UniProt</b>                       | <b>TXID</b> | <b>UniProt</b>                             | <b>TXID</b> | <b>UniProt</b>                   | <b>TXID</b> |
| Q9FJ82                               | 3702        | Q93ZN9                                     | 3702        | Q9LFG2                           | 3702        |
| D7MRM8                               | 81972       | D7MGH0                                     | 81972       | D7LUJ8                           | 81972       |
| B9ID05                               | 3694        | A9PAK9                                     | 3694        | B9T434                           | 3988        |
| B9R9G4                               | 3988        | B9S7T6                                     | 3988        | C6T990                           | 3847        |
| A5BWJ3                               | 29760       | C5WNE7                                     | 4558        | D2DKE8                           | 3847        |
| B8ALW1                               | 39946       | Q10MQ2                                     | 39947       | C6TKD3                           | 3847        |
| Q10SL6                               | 39947       | Q6VMN8                                     | 39947       | B9HCY9                           | 3694        |
| Q10SL7                               | 39947       | Q10MQ1                                     | 39947       | Q2QNF7                           | 39947       |
| Q8H053                               | 39947       | B8AM24                                     | 39946       | A2ZLS4                           | 39946       |
| B6TCY5                               | 4577        | C0PB44                                     | 4577        | B4F833                           | 4577        |
| B6TVJ6                               | 4577        | B6TIG6                                     | 4577        | B4FV18                           | 4577        |
| C5X107                               | 4558        | B8LPM3                                     | 3332        | C4J3L7                           | 4577        |
| B8HRK9                               | 395961      | A9RZ64                                     | 145481      | B8LLS8                           | 3332        |
| Q8YU19                               | 103690      | A8IW39                                     | 3055        | A8J8B3                           | 3055        |
| Q3MFY8                               | 240292      | C1FDC5                                     | 296587      | P74667                           | 1148        |
| B4AZ18                               | 497965      | C1ML22                                     | 564608      | A4RTF7                           | 436017      |
| Q9S3W8                               | 83541       | A4RTW6                                     | 436017      | Q8YVD0                           | 103690      |
| B2J0A9                               | 63737       | Q8F814                                     | 173         | Q01DU1                           | 70448       |
| B7FJZ3                               | 3880        | B2URC5                                     | 349741      | Q3M8I9                           | 240292      |
| Q10YI1                               | 203124      | Q04UL5                                     | 355277      | Q116P1                           | 203124      |
| A8YA16                               | 267872      | Q4BZ78                                     | 165597      | Q5N013                           | 269084      |
| B4VQ48                               | 118168      | C9KJX2                                     | 500635      | Q31LW2                           | 1140        |
| A0YTJ0                               | 313612      | D4LU96                                     | 657314      | B1WRQ3                           | 43989       |
| D7DW84                               | 551115      | D4TD09                                     | 533240      | Q4C9K0                           | 165597      |
| D4ZRB5                               | 696747      | Q3MAL4                                     | 240292      | A0ZFP0                           | 313624      |
| A0ZBM1                               | 313624      | D4TN53                                     | 533247      | C1E847                           | 296587      |
| P72642                               | 1148        | A2C4T7                                     | 167555      | D7E3Y4                           | 551115      |
| D3ER31                               | 713887      | A5ZXT2                                     | 411459      | A3IPP9                           | 391612      |
| C7QT35                               | 395962      | Q46IX2                                     | 59920       | B2J3A7                           | 63737       |
| B7JW41                               | 41431       | D4LJ76                                     | 657323      | D4ZQS6                           | 696747      |
| B7KBV6                               | 65393       | A8YN93                                     | 267872      | B7K1E7                           | 41431       |
| Q4C722                               | 165597      | C6JBM2                                     | 457412      | C7QMM0                           | 395962      |
| B0JU93                               | 449447      | A0ZK97                                     | 313624      | B1XP39                           | 32049       |
| B5VUP2                               | 513049      | D3LWE8                                     | 699218      | B5W4D7                           | 513049      |
| B1WVV1                               | 43989       | Q55828                                     | 1148        | A0YIC3                           | 313612      |
| A3IP23                               | 391612      | B0JUM0                                     | 449447      | D7G034                           | 2880        |
| D4TJK8                               | 533240      | A3PEY9                                     | 167546      | D4TCL8                           | 533240      |
| D4TPX1                               | 533247      | Q7VA14                                     | 1219        | B0JJ58                           | 449447      |
| Q8DHH2                               | 197221      | Q05QI0                                     | 221359      | B7KH06                           | 65393       |
| Q31LA3                               | 1140        | B5JK20                                     | 382464      | B0C312                           | 329726      |
| Q5N0M4                               | 269084      | C0B4X7                                     | 470146      | A1KYM7                           | 309035      |
| B1XIL4                               | 32049       | C6LHV7                                     | 478749      | C1MZF9                           | 564608      |

|        |        |        |        |        |        |
|--------|--------|--------|--------|--------|--------|
| B0CE31 | 329726 | B8IZX8 | 525146 | B4WKJ6 | 91464  |
| Q2JUX2 | 321327 | C7LN57 | 525897 | A8YK88 | 267872 |
| Q7NLC0 | 33072  | Q01D71 | 70448  | B8HU20 | 395961 |
| Q2JMX5 | 321332 | B2A0D8 | 452637 | Q2JLR0 | 321332 |
| Q0IAU2 | 64471  | C8X2J2 | 485915 | D3EP27 | 713887 |
| A2BWF3 | 167542 | D4J5D6 | 717962 | Q8DGM2 | 197221 |
| Q7V1N1 | 59919  | A0LEA5 | 335543 | Q2JUV6 | 321327 |
| B4WJU3 | 91464  | A1ATI6 | 338966 | D4TMN5 | 533247 |
| A5GLQ0 | 32051  | A1VDD3 | 391774 | B7FV89 | 556484 |
| Q05SII | 221359 | A2BT75 | 146891 | Q7NMF1 | 33072  |
| A3ZAN8 | 221360 | A2BYM6 | 167542 | B8LBN1 | 296543 |
| A5GSL5 | 316278 | A2CC97 | 59922  | A4CUI5 | 59931  |
| A2C9I1 | 59922  | A3DK17 | 203119 | A5GT84 | 316278 |
| B9P225 | 93058  | A4J569 | 349161 | C9KKR6 | 500635 |
| A8G504 | 93060  | A5D192 | 370438 | A5GL73 | 32051  |
| A4CVA2 | 59931  | A5FRC5 | 216389 | B5IJR7 | 180281 |
| Q7V7D4 | 74547  | A5GD93 | 351605 | C9LXX1 | 546271 |
| Q3AYN5 | 316279 | A5GIN1 | 32051  | A3YZK9 | 69042  |
| B5IMN8 | 180281 | A5GW23 | 316278 | Q24TW0 | 138119 |
| C9RB80 | 429009 | A5UN82 | 420247 | C5YPW9 | 4558   |
| A2BRB1 | 146891 | A6L7E4 | 435590 | D1NN49 | 492476 |
| Q7VC38 | 1219   | A6L8U2 | 435591 | C7HJ64 | 572545 |
| Q31AR7 | 74546  | A8G700 | 93060  | A3DK16 | 203119 |
| Q7U807 | 84588  | A9BCJ1 | 93059  | B7FIP6 | 3880   |
| Q065M4 | 313625 | A9KJ19 | 357809 | B8FSD4 | 272564 |
| A3PD36 | 167546 | B0B7W0 | 471472 | A6VFK8 | 426368 |
| B1X5K1 | 39717  | B0BC25 | 471473 | B0TGR9 | 498761 |
| Q3AIK8 | 110662 | B0CDH5 | 329726 | C8W080 | 485916 |
| A3Z0A9 | 69042  | B0SEH8 | 355278 | A9AB27 | 444158 |
| D0CKU0 | 166314 | B0SMK7 | 456481 | Q6LYS1 | 39152  |
| A2C2A9 | 167555 | B0TA38 | 498761 | C9LLL5 | 592028 |
| Q46KV7 | 59920  | B1GYM9 | 471821 | A4FXV0 | 402880 |
| D5WPZ0 | 562970 | B1I544 | 477974 | Q067B7 | 313625 |
| C9LLD1 | 592028 | B1WSG7 | 43989  | Q0IAE7 | 64471  |
| D5XF32 | 635013 | B1XKF6 | 32049  | Q7U6T2 | 84588  |
| C8W4M5 | 485916 | B2A250 | 457570 | A3Z6S8 | 221360 |
| B1I379 | 477974 | B2J2U3 | 63737  | D5X7U3 | 635013 |
| A5D2T4 | 370438 | B2KDH1 | 445932 | C7IDA2 | 588581 |
| Q24UK0 | 138119 | B3E933 | 398767 | Q05SY3 | 221359 |
| B8FQZ3 | 272564 | B4U7R3 | 380749 | B1X3T5 | 39717  |
| A3CMU3 | 388919 | B5EGX2 | 404380 | A1HMY7 | 401526 |
| D0RTK6 | 469609 | B5YE44 | 309799 | C6D4H0 | 324057 |
| C7V5N1 | 565640 | B5YHG6 | 289376 | Q3AJV7 | 110662 |
| B0THS7 | 498761 | B6YRL2 | 511995 | Q3AXV6 | 316279 |
| Q8EQD3 | 182710 | B7G959 | 556484 | A6UN47 | 406327 |
| D5S7G9 | 760570 | B7JVL5 | 41431  | D2R217 | 530564 |

|        |        |        |        |        |        |
|--------|--------|--------|--------|--------|--------|
| D3UPL1 | 683837 | B7KL61 | 65393  | B1C3N1 | 428126 |
| C7W2L8 | 565647 | B8BT02 | 296543 | B0N3X2 | 445974 |
| D4MBC3 | 657310 | B8CX89 | 373903 | C3RLM7 | 556270 |
| C7VCN7 | 565644 | B8DJJ6 | 883    | A2C9T8 | 59922  |
| Q834S6 | 1351   | B8E282 | 515635 | C4V4G3 | 638302 |
| D4ETL6 | 699186 | B8FH35 | 439235 | B1I545 | 477974 |
| D4EQD6 | 699185 | B8HJY4 | 395961 | D0CJ51 | 166314 |
| C7YBB4 | 565639 | B9M384 | 316067 | D4S5H7 | 585503 |
| C7X1X8 | 565645 | B9T7N8 | 3988   | A7AZS1 | 411470 |
| C7WKP6 | 565643 | C0QFJ4 | 177437 | Q2RK34 | 264732 |
| C7WA99 | 565648 | C4PR66 | 580049 | Q7V7M5 | 74547  |
| C7UV05 | 565650 | C4XSJ5 | 573370 | C6J2A7 | 621372 |
| C7UNT8 | 565641 | C4Z4Y1 | 515620 | B8IZX7 | 525146 |
| C7UGU3 | 565642 | C4ZG66 | 515619 | D3E5S4 | 481743 |
| C7CSV9 | 565636 | C5WUP9 | 4558   | A7VC93 | 411489 |
| C2JK61 | 491075 | C6BUK3 | 526222 | A5D193 | 370438 |
| C2H4Z5 | 525271 | C6E9Q7 | 443144 | A6CA20 | 344747 |
| C2DCT5 | 525278 | C7NIU7 | 478801 | D4IXE0 | 657324 |
| C0X5E5 | 491074 | C7QUY5 | 395962 | B9MLW7 | 521460 |
| C7VVS6 | 565649 | C8W082 | 485916 | Q3AC09 | 246194 |
| C7D3K6 | 565637 | C9R854 | 429009 | A3ZPZ9 | 314230 |
| A4J5W0 | 349161 | C9RS70 | 59374  | D3NM52 | 663278 |
| D3KQF3 | 393121 | D2BHI6 | 311424 | B5CS56 | 471875 |
| B8DC19 | 552536 | D2RNW3 | 591001 | A4J568 | 349161 |
| D4Q2V0 | 401650 | D3DG71 | 608538 | C0EZ50 | 411469 |
| C4VH41 | 553209 | D3E2N1 | 634498 | D4M005 | 657313 |
| Q71YA8 | 265669 | D3EQB9 | 713887 | A4XJ32 | 351627 |
| Q4EFL4 | 267410 | D3FE59 | 469383 | B0SJ91 | 456481 |
| D4PND0 | 393117 | D3SIJ0 | 633145 | B0SC36 | 355278 |
| Q92AA1 | 1642   | D3SN17 | 638303 | B8CX90 | 373903 |
| C8JRY6 | 393124 | D5EUE6 | 264731 | C4G3I1 | 592010 |
| A9BAK4 | 93059  | D5SY13 | 521674 | C0C049 | 553973 |
| C7VNE0 | 565646 | D5X7U2 | 635013 | B6FUM8 | 500632 |
| A0AK12 | 386043 | D6YVH0 | 716544 | B0G1Z4 | 411461 |
| C7WP49 | 565651 | D6Z5R9 | 589865 | B3EJB0 | 398767 |
| C7U826 | 565638 | D7CLP6 | 643648 | A6BDH2 | 411462 |
| C6J791 | 621372 | D7E3Y9 | 551115 | B7ASA9 | 483218 |
| D6KHS6 | 457416 | O26158 | 187420 | C4Z900 | 515619 |
| D4V320 | 791166 | O66630 | 63363  | A5Z6H7 | 411463 |
| Q8Y5Z6 | 1639   | O84395 | 813    | D5SNB0 | 521674 |
| Q4EQT8 | 267409 | Q04YV8 | 355276 | C9R855 | 429009 |
| D4PUV5 | 393131 | Q0ID68 | 64471  | D1N121 | 340101 |
| D2P6L5 | 637381 | Q10ZC3 | 203124 | D4JIW6 | 657317 |
| D2NV90 | 653938 | Q118Y1 | 203124 | C4Z3I0 | 515620 |
| C8KBJ1 | 393128 | Q18T09 | 272564 | B6YS11 | 511995 |
| C0GGI1 | 555088 | Q1MR87 | 363253 | B5YL43 | 289376 |

|        |        |        |        |        |        |
|--------|--------|--------|--------|--------|--------|
| B4BKX2 | 495036 | Q24S01 | 138119 | D4MWP8 | 245018 |
| A4IQ67 | 420246 | Q253K9 | 264202 | C6LHV8 | 478749 |
| D6KMY5 | 450749 | Q2JLL9 | 321332 | B0P3K7 | 411484 |
| D5AHF0 | 423211 | Q2JS04 | 321327 | D3AG19 | 566550 |
| C6GTD5 | 568814 | Q2LYC4 | 56780  | D6E3Z8 | 657318 |
| C6GRR1 | 568813 | Q2NFU1 | 339860 | B2KDH2 | 445932 |
| C5VW49 | 218494 | Q2RK33 | 264732 | A4CFE1 | 87626  |
| A4W0U7 | 391296 | Q30ZX9 | 207559 | B9M4N3 | 316067 |
| A4VUK5 | 391295 | Q318P3 | 74546  | A5G8E2 | 351605 |
| B9WSD6 | 286604 | Q31PY6 | 1140   | D7CLP5 | 643648 |
| C9S0M7 | 544556 | Q39Z65 | 269799 | Q39ZZ8 | 338963 |
| C3IYW1 | 550542 | Q3A1U5 | 338963 | C0GG15 | 555088 |
| D3LUA6 | 699218 | Q3AC10 | 246194 | B0NK22 | 411468 |
| C3BIB4 | 527000 | Q3AMU5 | 110662 | Q3IEW3 | 326442 |
| D1YR92 | 686660 | Q3AW44 | 316279 | A0Y0F0 | 156578 |
| C4FQU4 | 546273 | Q3KLW3 | 315277 | Q74FS5 | 35554  |
| Q2B3W1 | 313627 | Q3MDN5 | 240292 | C6MV42 | 443143 |
| D1BMK2 | 479436 | Q3Z8H5 | 243164 | A9BAE5 | 93059  |
| B5YEB2 | 309799 | Q3ZXC8 | 255470 | Q2SQ64 | 349521 |
| C3B1K3 | 526999 | Q5L6M0 | 83555  | A1AUI6 | 338966 |
| Q5KXW6 | 1462   | Q5LC03 | 272559 | C0QAP3 | 177437 |
| D7D4X4 | 691437 | Q5N492 | 269084 | B0ME98 | 411490 |
| B6J2F3 | 434923 | Q64SY6 | 817    | B5EAT0 | 404380 |
| D3HE35 | 637909 | Q6AL81 | 84980  | D4LKA8 | 657323 |
| A9ZGK8 | 360117 | Q6MDE0 | 264201 | D4RZ76 | 511680 |
| A1HSC9 | 401526 | Q72BI1 | 882    | C5BUL6 | 377629 |
| B1HTF0 | 444177 | Q74GT3 | 35554  | Q39RB7 | 269799 |
| D2RKF5 | 591001 | Q7NDX4 | 33072  | B3PEI8 | 498211 |
| A7GN70 | 315749 | Q7U4C3 | 84588  | B6WRE7 | 411464 |
| D2EQ55 | 563037 | Q7UZZ3 | 59919  | B9P1W1 | 93058  |
| D3G0K0 | 398511 | Q7V4Z3 | 74547  | C6DYE5 | 443144 |
| D4FU46 | 655813 | Q824A4 | 83557  | A5ZMM8 | 411459 |
| P24703 | 777    | Q8AAB8 | 818    | A5KLX2 | 411460 |
| B6J4U6 | 434924 | Q8DH57 | 197221 | Q46L14 | 59920  |
| A9NA71 | 360115 | Q8YM38 | 103690 | A2C243 | 167555 |
| A9KC25 | 434922 | Q8YP73 | 103690 | D3LTT0 | 699218 |
| Q4MSU5 | 269801 | Q9PK04 | 83560  | Q7V1I3 | 59919  |
| C8K292 | 393125 | Q9Z856 | 83558  | D7AF85 | 663917 |
| B1SCD8 | 471872 | A0B7B6 | 349307 | Q04X60 | 355276 |
| Q63DK0 | 288681 | A0YL74 | 313612 | Q04W97 | 355277 |
| C2W655 | 526986 | A0YXK2 | 313612 | A2BR46 | 146891 |
| Q73AW1 | 222523 | A1HSP1 | 401526 | Q0ACL9 | 187272 |
| Q8DUL9 | 1309   | A2SR50 | 410358 | A8G4T8 | 93060  |
| C2QQS5 | 526977 | A3CWU1 | 368407 | Q8F9V5 | 173    |
| C3HG81 | 527028 | A3EPN1 | 419542 | D4XXY4 | 552811 |
| C3GGK4 | 527029 | A3INN1 | 391612 | Q7VBZ4 | 1219   |

|        |        |        |        |        |        |
|--------|--------|--------|--------|--------|--------|
| C3G0Q9 | 527032 | A3YX64 | 69042  | A8GZG9 | 398579 |
| C3EZD9 | 527022 | A3Z2H0 | 69042  | C6Z1D8 | 457394 |
| C3C042 | 527024 | A3Z8Q5 | 221360 | Q31AX3 | 74546  |
| C2S1H6 | 526975 | A4CST4 | 59931  | A1TXX7 | 351348 |
| B9IVQ5 | 361100 | A5BGZ4 | 29760  | A3JE40 | 270374 |
| B7HL46 | 405534 | A5Z615 | 411463 | A3Q9P7 | 323850 |
| B5V2V4 | 451708 | A5ZC45 | 411901 | D4LQR2 | 657314 |
| C3IH91 | 527020 | A6BDH3 | 411462 | A7JUW9 | 272629 |
| C3HY69 | 527019 | A6C2S7 | 344747 | D4V4I9 | 702446 |
| C3DHM5 | 527026 | A6NZA0 | 411467 | A6L7E5 | 435590 |
| B7GHS4 | 491915 | A7AFG3 | 411477 | B8F878 | 557723 |
| Q02Y20 | 272622 | A7B080 | 411470 | B0QSW6 | 456298 |
| A3IG33 | 388400 | A7IA49 | 456442 | A6F216 | 443152 |
| C2MIJ6 | 526973 | A7M0Y2 | 411476 | Q1K3Q6 | 281689 |
| D3HA89 | 365659 | A7V2U1 | 411479 | Q8R9S4 | 119072 |
| Q81FP4 | 226900 | A7VC94 | 411489 | C0N8U7 | 637616 |
| D5TV19 | 714359 | A8RQU9 | 411902 | Q21P78 | 203122 |
| C3E1B9 | 527027 | A8S7U3 | 411485 | Q2BRG0 | 207954 |
| C2UBN0 | 526982 | A8SUI4 | 411474 | Q0AIP0 | 335283 |
| C2SYR0 | 526978 | A8UWT7 | 392423 | C5S4E6 | 637911 |
| C2RKV5 | 526974 | A8ZXV5 | 96561  | C9L533 | 537007 |
| C2BZ67 | 525367 | B0G1W3 | 411461 | A3PCW9 | 167546 |
| C2VRG3 | 526985 | B0M8Z2 | 411490 | D4LE47 | 213810 |
| C2TEB2 | 526979 | B0MN95 | 428128 | B7S2B6 | 247634 |
| C2NFD8 | 526970 | B0NK21 | 411468 | C8KY75 | 591023 |
| C1EN29 | 572264 | B0NTM8 | 449673 | C6PE47 | 580327 |
| B7JH17 | 405535 | B0NXC1 | 411484 | B2A663 | 457570 |
| B3ZTX3 | 451709 | B0PBH5 | 445972 | Q0BAY6 | 339670 |
| B3Z7I6 | 451707 | B1X4W1 | 39717  | A3N2H9 | 416269 |
| B3YRE5 | 405917 | B3C8K3 | 471870 | B9Z0T9 | 279714 |
| A0RBY6 | 412694 | B3JFW8 | 470145 | A2BWL6 | 167542 |
| C3FHY1 | 527031 | B3JK42 | 470145 | C6AQB3 | 634176 |
| C3CZF2 | 527025 | B4AW92 | 497965 | B0TJ49 | 458817 |
| C3CGJ9 | 527021 | B4CY42 | 497964 | P57962 | 747    |
| C3GYT4 | 527030 | B4VUN1 | 118168 | B4S2D9 | 314275 |
| C3EIW9 | 527023 | B4WNA0 | 91464  | Q0HQJ2 | 60481  |
| C2X9L2 | 526989 | B5CQ88 | 471875 | Q0HN95 | 60480  |
| C2WK80 | 526987 | B5CZ47 | 484018 | B3GYL3 | 537457 |
| C2R5V6 | 526969 | B5D1T9 | 484018 | Q8E9H5 | 70863  |
| C2MYM4 | 526980 | B5IPW6 | 180281 | C0CQW1 | 476272 |
| B7IPB0 | 405531 | B5W7X0 | 513049 | C1D8Q0 | 557598 |
| B7HHT6 | 405532 | B5W8E7 | 513049 | B9BGP9 | 513051 |
| B5URT8 | 405533 | B6AM89 | 419541 | B3CVY6 | 395019 |
| C2NWN4 | 526967 | B6FUM7 | 500632 | A9AC26 | 395019 |
| B1S145 | 453362 | B6W4A0 | 483217 | D4EES7 | 694569 |
| B5E6K0 | 512566 | B6WRE6 | 411464 | A3N4H9 | 320373 |

|        |        |        |        |        |        |
|--------|--------|--------|--------|--------|--------|
| A2RJS9 | 416870 | B7AKB1 | 483216 | C7ITQ2 | 589861 |
| C6SR04 | 511691 | B7ASB1 | 483218 | C7HR72 | 588857 |
| C2YPF3 | 526992 | B7BAG4 | 537006 | C5UAG1 | 509193 |
| C2PCQ0 | 526971 | B8AQ26 | 39946  | A0KS65 | 94122  |
| C2Y8G8 | 526991 | B8GI82 | 521011 | Q5FQZ4 | 442    |
| Q5WGQ4 | 66692  | B9AE27 | 483214 | Q39BY7 | 269483 |
| B8E2S7 | 515635 | B9HFK8 | 3694   | D0KXR5 | 555778 |
| B2IR75 | 516950 | B9MXH8 | 3694   | Q1PZ14 | 174633 |
| B2DMV4 | 453363 | B9NYK1 | 93058  | D5C3E8 | 472759 |
| A5LSC2 | 406558 | B9RJE0 | 3988   | C5V604 | 395494 |
| C1C8E8 | 488221 | C0C048 | 553973 | B0BRC5 | 434271 |
| B2DUA2 | 453364 | C0CJ66 | 476272 | C9R2C0 | 668336 |
| B2DJ43 | 453361 | C0CXE4 | 518636 | C7R6T0 | 523791 |
| B1ICX7 | 487214 | C0EAG2 | 537013 | A8KK52 | 331978 |
| C2UT52 | 526983 | C0EZ51 | 411469 | A4YBF7 | 319224 |
| B2E398 | 453366 | C0FNL3 | 622312 | A2UYN5 | 399804 |
| A0B7E0 | 349307 | C0GG14 | 555088 | A1RPD2 | 351745 |
| A0JUX2 | 290399 | C0WB45 | 563191 | D0Z0U1 | 675817 |
| A0K4H7 | 331272 | C2KW99 | 585501 | Q0BS04 | 391165 |
| A0KLT2 | 380703 | C3PYN4 | 457395 | B8CHW4 | 225849 |
| A0KTT2 | 94122  | C3QJF9 | 556258 | B1K0F5 | 406425 |
| A0L4Z4 | 156889 | C3QYL3 | 469590 | D1BPE4 | 479436 |
| A0LEA6 | 335543 | C3R4Z4 | 556260 | A0AKC4 | 386043 |
| A0LV18 | 351607 | C4FSJ0 | 546273 | A0B3V6 | 331272 |
| A0LZI4 | 411154 | C4G914 | 626523 | A0B6C1 | 349307 |
| A0PQF7 | 362242 | C4PMP7 | 672161 | A0JUY8 | 290399 |
| A0PQF8 | 362242 | C5EHK7 | 457421 | A0KBF6 | 331272 |
| A0PZM2 | 386415 | C5TVY7 | 573059 | A0KFI1 | 380703 |
| A0Q8L6 | 401614 | C6HWT7 | 412449 | A0LE31 | 156889 |
| A0Q9R9 | 243243 | C6ICR6 | 457392 | A0LEA8 | 335543 |
| A0QBL2 | 243243 | C6IH47 | 469586 | A0LUZ5 | 351607 |
| A0QDJ4 | 243243 | C6MVY8 | 443143 | A0LZ07 | 411154 |
| A0QDR5 | 243243 | C6PMM1 | 536227 | A0PT80 | 362242 |
| A0QEP8 | 243243 | C6TCD0 | 3847   | A0Q076 | 386415 |
| A0QIV1 | 243243 | C6Z1D9 | 457394 | A0QIQ8 | 243243 |
| A0QIV4 | 243243 | C7GD62 | 536231 | A0QVY0 | 246196 |
| A0QMI2 | 243243 | C7H522 | 411483 | A0RKC7 | 412694 |
| A0QPY3 | 246196 | C7HJ63 | 572545 | A0RRQ3 | 360106 |
| A0QQF1 | 246196 | C7IDA1 | 588581 | A1A2L5 | 367928 |
| A0QVR3 | 246196 | C7XE85 | 563193 | A1AHX7 | 405955 |
| A0QXI7 | 246196 | C9KW44 | 483215 | A1AWJ5 | 413404 |
| A0R0D7 | 246196 | C9L460 | 537007 | A1AZ15 | 318586 |
| A0R2Z5 | 246196 | C9LFU6 | 626522 | A1BD08 | 290317 |
| A0RMR7 | 360106 | C9LL97 | 592028 | A1JI90 | 393305 |
| A1A301 | 367928 | C9LSX6 | 546271 | A1K306 | 62928  |
| A1A780 | 405955 | D0CL43 | 166314 | A1KM64 | 410289 |



|        |        |        |        |        |        |
|--------|--------|--------|--------|--------|--------|
| A1ATI7 | 338966 | D0TIE2 | 469589 | A1KT22 | 272831 |
| A1AU34 | 338966 | D0TNY6 | 469588 | A1R552 | 290340 |
| A1AX89 | 413404 | D1A0J5 | 406984 | A1SAP5 | 326297 |
| A1B5T8 | 318586 | D1BR52 | 479436 | A1SNF4 | 196162 |
| A1BI80 | 290317 | D1JPF0 | 469587 | A1SQZ9 | 357804 |
| A1JJE5 | 393305 | D1JXU6 | 457391 | A1SZV6 | 357804 |
| A1K8N8 | 62928  | D1N122 | 340101 | A1T7U8 | 350058 |
| A1KMB5 | 410289 | D1NN50 | 492476 | A1TKA9 | 397945 |
| A1KRN3 | 272831 | D1PHW5 | 537011 | A1UEZ9 | 189918 |
| A1R536 | 290340 | D1PNX9 | 411471 | A1UQV5 | 360095 |
| A1RGQ6 | 351745 | D1U3Q1 | 643562 | A1V7L3 | 320388 |
| A1S8K1 | 326297 | D1YNA0 | 686660 | A1VD00 | 391774 |
| A1SDT3 | 196162 | D1YWW0 | 304371 | A1VSV4 | 365044 |
| A1SLI4 | 196162 | D2F273 | 585543 | A1W1D0 | 354242 |
| A1T0R6 | 357804 | D2L7V1 | 644968 | A1WC24 | 232721 |
| A1T7N8 | 350058 | D2RDI5 | 572546 | A1WRJ4 | 391735 |
| A1TBK3 | 350058 | D2ZQH7 | 521002 | A1WWB3 | 349124 |
| A1TEU5 | 350058 | D3AG20 | 566550 | A2S862 | 412022 |
| A1TVV2 | 397945 | D3MWB4 | 547146 | A2SKV9 | 420662 |
| A1U612 | 351348 | D3NM51 | 663278 | A2SQX8 | 410358 |
| A1UEU3 | 189918 | D3RWW4 | 589924 | A3CXI3 | 368407 |
| A1UII6 | 189918 | D3UUK5 | 634464 | A3D9Q0 | 325240 |
| A1ULD2 | 189918 | D4C7W9 | 411486 | A3M804 | 400667 |
| A1UTM3 | 360095 | D4CM94 | 608534 | A3MRQ6 | 320389 |
| A1V0H0 | 320388 | D4IZ77 | 657324 | A3NQ71 | 357348 |
| A1VDM6 | 391774 | D4JM32 | 657317 | A3PMY1 | 349101 |
| A1VTV7 | 365044 | D4JQX4 | 657319 | A3PYF9 | 164757 |
| A1VXS5 | 354242 | D4JYF2 | 718252 | A3UAS7 | 216432 |
| A1WCQ3 | 232721 | D4KBN2 | 657322 | A4CLX3 | 313596 |
| A1WGT9 | 391735 | D4KDG0 | 657316 | A4FAJ6 | 405948 |
| A1WX29 | 349124 | D4KN13 | 657315 | A4G980 | 204773 |
| A2S5J7 | 412022 | D4KZK4 | 718255 | A4ISE8 | 420246 |
| A2SC94 | 420662 | D4L4P5 | 657321 | A4JIQ6 | 269482 |
| A2SQU7 | 410358 | D4LE48 | 213810 | A4QEV1 | 340322 |
| A3CVI6 | 368407 | D4MID7 | 717961 | A4SGM1 | 290318 |
| A3D7S3 | 325240 | D4MZD8 | 245018 | A4SRW9 | 382245 |
| A3DE18 | 203119 | D4RZ75 | 511680 | A4T0F3 | 312153 |
| A3DEM3 | 203119 | D4UR02 | 246199 | A4TCN3 | 350054 |
| A3DKP5 | 399550 | D4V4J0 | 702446 | A4TRA3 | 386656 |
| A3MA87 | 400667 | D4VH64 | 702447 | A4VGW5 | 379731 |
| A3MPI2 | 320389 | D4WM69 | 702443 | A4WG08 | 399742 |
| A3N048 | 416269 | D4WYW4 | 702444 | A4WWV1 | 349102 |
| A3NDK8 | 320373 | D4YDS2 | 655812 | A4X4W2 | 369723 |
| A3NZB9 | 357348 | D4ZR68 | 696747 | A4XNX4 | 399739 |
| A3PNF3 | 349101 | D4ZUW6 | 696747 | A4YKA5 | 114615 |
| A3PYA0 | 164757 | D5E6U9 | 547558 | A5CSL3 | 443906 |

|        |        |        |        |        |        |
|--------|--------|--------|--------|--------|--------|
| A3Q2C7 | 164757 | D5HHF3 | 751585 | A5CWN5 | 412965 |
| A3Q2H3 | 164757 | D5MIK6 | 671143 | A5E915 | 288000 |
| A3Q5T1 | 164757 | D5R8I6 | 642492 | A5EWY0 | 246195 |
| A3QGV8 | 323850 | D6D4K6 | 657309 | A5FP09 | 376686 |
| A3U8E2 | 216432 | D6DI91 | 717608 | A5FRC6 | 216389 |
| A4CQ00 | 313596 | D6E150 | 657318 | A5G1F7 | 349163 |
| A4FM20 | 405948 | D6E6I8 | 657308 | A5I336 | 441771 |
| A4FXV6 | 402880 | D6KL85 | 457416 | A5IHM9 | 400673 |
| A4G8E2 | 204773 | D6KR81 | 450749 | A5IM61 | 390874 |
| A4JBH8 | 269482 | D6SLY7 | 555779 | A5N7G4 | 431943 |
| A4QEY0 | 340322 | D6YDF3 | 707184 | A5U678 | 419947 |
| A4S841 | 436017 | D6YFJ7 | 707185 | A5UDX5 | 374930 |
| A4SD53 | 290318 | D6YI63 | 707186 | A5UHQ4 | 374931 |
| A4SLF8 | 382245 | D6YKT8 | 707187 | A5UMZ9 | 420247 |
| A4SVD8 | 312153 | D6YMK1 | 707183 | A5VAG4 | 392499 |
| A4T266 | 350054 | D6YY75 | 718219 | A5VJ53 | 557436 |
| A4T275 | 350054 | D7ADD0 | 663917 | A5VSQ7 | 444178 |
| A4T700 | 350054 | D7EAR9 | 644295 | A5W425 | 351746 |
| A4TCI6 | 350054 | D7II92 | 469585 | A5WAU5 | 351746 |
| A4TQE9 | 386656 | D7IVX4 | 469592 | A5WCB3 | 349106 |
| A4VPQ3 | 379731 | D7J761 | 585544 | A5WQX7 | 336982 |
| A4W6E7 | 399742 | D7JF59 | 575590 | A6GYX5 | 402612 |
| A4WWP7 | 349102 | D7K9E0 | 457390 | A6L8U3 | 435591 |
| A4X4Q0 | 369723 | O29838 | 2234   | A6LP57 | 391009 |
| A4XJT9 | 351627 | Q061A0 | 313625 | A6LTU4 | 290402 |
| A4XYF4 | 399739 | Q0W3B8 | 351160 | A6Q160 | 387092 |
| A4Y9M3 | 319224 | Q12X74 | 259564 | A6QCY7 | 387093 |
| A4YJP9 | 114615 | Q1K3A6 | 281689 | A6T2Z4 | 375286 |
| A5CCS0 | 357244 | Q1NV23 | 262489 | A6TGJ2 | 272620 |
| A5CSN2 | 443906 | Q2FU41 | 323259 | A6TRX5 | 293826 |
| A5CW12 | 412965 | Q469C7 | 269797 | A6UE39 | 366394 |
| A5E8K0 | 288000 | Q647Q2 | 285401 | A6UTH4 | 419665 |
| A5EVH3 | 246195 | Q6VMN7 | 39947  | A6VE52 | 381754 |
| A5FEM3 | 376686 | Q8H7W8 | 39947  | A6VQR8 | 339671 |
| A5FNI0 | 376686 | Q8PTR4 | 2209   | A6VT35 | 400668 |
| A5FQT3 | 216389 | Q8TQ40 | 2214   | A6W1B0 | 400668 |
| A5FXD9 | 349163 |        |        | A6W850 | 266940 |
| A5GD90 | 351605 |        |        | A6WTF5 | 402882 |
| A5HZY4 | 441771 |        |        | A6WXE4 | 439375 |
| A5I6N3 | 441771 |        |        | A7FD74 | 349747 |
| A5I9V1 | 400673 |        |        | A7FUW7 | 441770 |
| A5IM63 | 390874 |        |        | A7GEM4 | 441772 |
| A5ISS8 | 359786 |        |        | A7GUE1 | 315749 |
| A5N115 | 431943 |        |        | A7H5P5 | 360109 |
| A5N262 | 431943 |        |        | A7H7Y0 | 404589 |
| A5U6C6 | 419947 |        |        | A7HJ55 | 381764 |

|        |        |        |        |
|--------|--------|--------|--------|
| A5UCB3 | 374930 | A7HT02 | 402881 |
| A5UF10 | 374931 | A7HZM9 | 360107 |
| A5ULF7 | 420247 | A7IB34 | 456442 |
| A5UY21 | 357808 | A7ICC6 | 78245  |
| A5V2Q9 | 392499 | A7K5A2 | 150340 |
| A5V819 | 392499 | A7MQK2 | 290339 |
| A5VJ59 | 557436 | A7N0W0 | 338187 |
| A5VVV4 | 444178 | A7Z8D3 | 326423 |
| A5W9A1 | 351746 | A7ZAX9 | 360104 |
| A5WBG0 | 349106 | A7ZU14 | 331111 |
| A5WR24 | 336982 | A8A6R7 | 331112 |
| A6GYP2 | 402612 | A8ACV7 | 290338 |
| A6KZT3 | 435590 | A8ER55 | 367737 |
| A6LFU6 | 435591 | A8EZ08 | 293613 |
| A6LLG5 | 391009 | A8F1I9 | 416276 |
| A6LP59 | 391009 | A8F8L9 | 416591 |
| A6LUD6 | 290402 | A8FH15 | 315750 |
| A6LXJ7 | 290402 | A8FNJ1 | 407148 |
| A6Q596 | 387092 | A8G0W0 | 425104 |
| A6Q6T6 | 387093 | A8G852 | 399741 |
| A6QGU7 | 426430 | A8GND7 | 293614 |
| A6T235 | 375286 | A8GS10 | 392021 |
| A6T4H8 | 272620 | A8GWH4 | 391896 |
| A6TQQ3 | 293826 | A8IN67 | 438753 |
| A6TT16 | 293826 | A8L6K2 | 298653 |
| A6U1L7 | 359787 | A8LMN6 | 398580 |
| A6UEW2 | 366394 | A8M7X0 | 391037 |
| A6UNQ4 | 406327 | A8MH77 | 350688 |
| A6UUT2 | 419665 | A8YUS7 | 405566 |
| A6VCL6 | 381754 | A8Z693 | 444179 |
| A6VFL4 | 426368 | A9A044 | 96561  |
| A6VPE4 | 339671 | A9BUI9 | 398578 |
| A6VUF0 | 400668 | A9FMF9 | 448385 |
| A6W817 | 266940 | A9HM33 | 272568 |
| A6WRU0 | 402882 | A9IH28 | 340100 |
| A6WYJ3 | 439375 | A9IZW1 | 382640 |
| A7FMD2 | 349747 | A9KGY8 | 434922 |
| A7FS48 | 441770 | A9KJ18 | 357809 |
| A7FYA2 | 441770 | A9KKW6 | 357809 |
| A7GBI9 | 441772 | A9L5F5 | 399599 |
| A7GI20 | 441772 | A9M3J3 | 374833 |
| A7GWC2 | 360105 | A9M8R8 | 483179 |
| A7H1R4 | 360109 | A9MY70 | 272994 |
| A7H774 | 404589 | A9N9J6 | 360115 |
| A7H7A8 | 404589 | A9R8K5 | 349746 |
| A7HJ57 | 381764 | A9VN01 | 315730 |

|        |        |        |        |
|--------|--------|--------|--------|
| A7HNJ8 | 381764 | A9W6A5 | 419610 |
| A7HZ36 | 402881 | A9WQ49 | 288705 |
| A7I316 | 360107 | B0B802 | 471472 |
| A7I854 | 456442 | B0BC67 | 471473 |
| A7IC74 | 78245  | B0BXH3 | 452659 |
| A7K451 | 150340 | B0CIT6 | 470137 |
| A7MI96 | 290339 | B0K299 | 399726 |
| A7MXR0 | 338187 | B0KA18 | 340099 |
| A7NN21 | 383372 | B0KQ41 | 76869  |
| A7X273 | 418127 | B0RHB0 | 31964  |
| A7Z600 | 326423 | B0RNK1 | 509169 |
| A7ZB70 | 360104 | B0T542 | 366602 |
| A7ZHC0 | 331111 | B0U6U5 | 405440 |
| A7ZVX9 | 331112 | B0UCI8 | 426117 |
| A8ALS4 | 290338 | B0UWU6 | 228400 |
| A8EWI3 | 367737 | B0VDN4 | 509173 |
| A8EXL6 | 293613 | B0VT30 | 509170 |
| A8F0Q6 | 416276 | B1GYN2 | 471821 |
| A8F564 | 416591 | B1IMS5 | 498213 |
| A8FEI3 | 315750 | B1IW95 | 481805 |
| A8FJZ8 | 407148 | B1J1W0 | 390235 |
| A8FYT6 | 425104 | B1JPE1 | 502800 |
| A8G9M8 | 399741 | B1K2V7 | 406425 |
| A8GMB6 | 293614 | B1KQD0 | 392500 |
| A8GQX3 | 392021 | B1KTZ0 | 498214 |
| A8GV42 | 391896 | B1LBR2 | 126740 |
| A8H756 | 398579 | B1LLY0 | 439855 |
| A8IH01 | 438753 | B1LY98 | 426355 |
| A8J8G6 | 3055   | B1MD00 | 561007 |
| A8L6G3 | 298653 | B1VXU0 | 455632 |
| A8L9J9 | 298653 | B1XAH6 | 316385 |
| A8LL24 | 398580 | B1XSI3 | 452638 |
| A8M760 | 391037 | B1Y6S6 | 395495 |
| A8MDJ0 | 397948 | B1YPQ6 | 398577 |
| A8MF41 | 350688 | B1ZDT1 | 441620 |
| A8MGL6 | 350688 | B1ZZ82 | 452637 |
| A8YUT4 | 405566 | B2AGE5 | 164546 |
| A8Z3X4 | 451516 | B2FUW0 | 522373 |
| A8Z627 | 444179 | B2G6M4 | 557433 |
| A9AB21 | 444158 | B2GC06 | 334390 |
| A9AHB2 | 395019 | B2GKG8 | 378753 |
| A9B6A5 | 316274 | B2HL16 | 216594 |
| A9BHR7 | 403833 | B2HX82 | 405416 |
| A9C1H2 | 398578 | B2IA16 | 405441 |
| A9FHA9 | 448385 | B2IEM1 | 395963 |
| A9HE99 | 272568 | B2JY4  | 391038 |

|        |        |        |        |
|--------|--------|--------|--------|
| A9IGA9 | 340100 | B2K072 | 502801 |
| A9IXE5 | 382640 | B2S885 | 430066 |
| A9KHY5 | 357809 | B2SMW6 | 360094 |
| A9L0Q8 | 399599 | B2T1P5 | 398527 |
| A9M3H7 | 374833 | B2TRP9 | 508765 |
| A9MCX7 | 483179 | B2TUW5 | 344609 |
| A9MYI6 | 272994 | B2UD25 | 402626 |
| A9NGC1 | 441768 | B2ULA2 | 349741 |
| A9R003 | 349746 | B2UTR2 | 512562 |
| A9T9L2 | 145481 | B2V4U0 | 508767 |
| A9VME3 | 315730 | B2V734 | 436114 |
| A9W5P6 | 419610 | B2VI49 | 338565 |
| A9WK53 | 324602 | B3CME7 | 570417 |
| A9WQ18 | 288705 | B3DQ52 | 205913 |
| A9WW61 | 470137 | B3DY27 | 481448 |
| B0B7T3 | 471472 | B3EEP7 | 290315 |
| B0BBZ8 | 471473 | B3EL46 | 331678 |
| B0BNW4 | 434271 | B3PR12 | 491916 |
| B0BWB9 | 452659 | B3Q277 | 491916 |
| B0K0N9 | 399726 | B3Q862 | 395960 |
| B0K4I4 | 399726 | B3QL52 | 517417 |
| B0K982 | 340099 | B3QXC3 | 517418 |
| B0KAL8 | 340099 | B3W7F0 | 543734 |
| B0KIS3 | 76869  | B4E7Z8 | 216591 |
| B0RGX5 | 31964  | B4ELE6 | 216591 |
| B0RSP5 | 509169 | B4F1X7 | 529507 |
| B0SCT1 | 355278 | B4RCE2 | 450851 |
| B0SL59 | 456481 | B4RK32 | 521006 |
| B0T684 | 366602 | B4S482 | 290512 |
| B0TQB8 | 458817 | B4SGB7 | 324925 |
| B0TWJ3 | 484022 | B4SJN4 | 391008 |
| B0U565 | 405440 | B4SZ51 | 423368 |
| B0UBD3 | 426117 | B4TB37 | 454169 |
| B0UU27 | 228400 | B4TNV9 | 439843 |
| B0VA26 | 509173 | B4U9P0 | 380749 |
| B0VPZ8 | 509170 | B4UCM0 | 447217 |
| B1GYN0 | 471821 | B5BIV6 | 554290 |
| B1IFB1 | 498213 | B5ENS1 | 380394 |
| B1IMW9 | 498213 | B5EZS3 | 454166 |
| B1IRE5 | 481805 | B5FCR0 | 388396 |
| B1J256 | 390235 | B5FNU5 | 439851 |
| B1JKZ4 | 502800 | B5QW52 | 550537 |
| B1JVG6 | 406425 | B5RFP9 | 550538 |
| B1KRS8 | 392500 | B5XWW5 | 507522 |
| B1KWZ3 | 498214 | B5XYK7 | 507522 |
| B1L0V2 | 498214 | B5YD87 | 309799 |

|        |        |        |        |
|--------|--------|--------|--------|
| B1LBR0 | 126740 | B5YY56 | 444450 |
| B1LFW1 | 439855 | B5Z6T7 | 563041 |
| B1M6A6 | 426355 | B5ZD84 | 272568 |
| B1MD52 | 561007 | B5ZTH4 | 395492 |
| B1MI01 | 561007 | B6EP85 | 316275 |
| B1MZM7 | 349519 | B6I4F0 | 409438 |
| B1VDC2 | 504474 | B6IP82 | 414684 |
| B1VXZ4 | 455632 | B6J395 | 434923 |
| B1XBF6 | 316385 | B6J630 | 434924 |
| B1XT71 | 452638 | B6JAP3 | 504832 |
| B1XXY2 | 395495 | B6JLE8 | 570508 |
| B1YJ40 | 262543 | B6VLR4 | 553480 |
| B1YT08 | 398577 | B7GKM1 | 491915 |
| B1ZA87 | 441620 | B7GPZ2 | 391904 |
| B1ZN18 | 452637 | B7GY71 | 557600 |
| B2A1K9 | 457570 | B7HBI0 | 405532 |
| B2FQ70 | 522373 | B7HUS8 | 405534 |
| B2G6N0 | 557433 | B7I5Y5 | 480119 |
| B2GC12 | 334390 | B7IF12 | 484019 |
| B2GKI1 | 378753 | B7IMV5 | 405531 |
| B2HHT7 | 216594 | B7J8H2 | 243159 |
| B2HKW4 | 216594 | B7JDJ2 | 405535 |
| B2HKW6 | 216594 | B7KQM2 | 440085 |
| B2I2G4 | 405416 | B7L969 | 585055 |
| B2I841 | 405441 | B7LU47 | 585054 |
| B2IBR8 | 395963 | B7M611 | 585034 |
| B2JGX9 | 391038 | B7MH73 | 585035 |
| B2K3N1 | 502801 | B7MR29 | 585397 |
| B2KAQ8 | 445932 | B7NFB1 | 585056 |
| B2RM71 | 431947 | B7NTD3 | 585057 |
| B2SC36 | 430066 | B7UNC6 | 574521 |
| B2SV83 | 360094 | B7V5G9 | 557722 |
| B2SYN9 | 398527 | B7VMD4 | 575788 |
| B2TS69 | 508765 | B8D8A8 | 561501 |
| B2U250 | 344609 | B8D8F1 | 563178 |
| B2UCA2 | 402626 | B8DBR3 | 552536 |
| B2UMF1 | 349741 | B8DKT9 | 883    |
| B2UTX8 | 512562 | B8DT02 | 442563 |
| B2V5A9 | 508767 | B8DZX7 | 515635 |
| B2V6A7 | 436114 | B8E690 | 407976 |
| B2VH06 | 338565 | B8EM14 | 395965 |
| B3CN84 | 570417 | B8FH34 | 439235 |
| B3CQD8 | 334380 | B8GJ70 | 521011 |
| B3DS96 | 205913 | B8GT89 | 396588 |
| B3DTC9 | 205913 | B8GVW2 | 565050 |
| B3DY25 | 481448 | B8HG93 | 452863 |

|        |        |        |        |
|--------|--------|--------|--------|
| B3E935 | 398767 | B8I9H6 | 460265 |
| B3EG74 | 290315 | B8JC32 | 455488 |
| B3EN04 | 331678 | B8ZQU1 | 561304 |
| B3ER88 | 452471 | B9E0X7 | 583346 |
| B3H1A7 | 537457 | B9J3D8 | 361100 |
| B3PBC1 | 498211 | B9JCL3 | 311403 |
| B3PSH1 | 491916 | B9JUB9 | 311402 |
| B3PXX4 | 491916 | B9K864 | 309803 |
| B3Q978 | 395960 | B9KED6 | 306263 |
| B3QKY9 | 517417 | B9KHB4 | 320483 |
| B3QYM8 | 517418 | B9KN64 | 557760 |
| B3R6R4 | 164546 | B9L726 | 598659 |
| B3R731 | 164546 | B9LUB6 | 416348 |
| B3W7E4 | 543734 | B9MFT0 | 535289 |
| B4EEW4 | 216591 | C0Q3B8 | 476213 |
| B4F2T9 | 529507 | C0QQ59 | 123214 |
| B4RC37 | 450851 | C0QZX1 | 565034 |
| B4RR35 | 521006 | C0R4N2 | 66084  |
| B4S0T3 | 314275 | C0RFH7 | 546272 |
| B4S4K2 | 290512 | C0ZDI1 | 358681 |
| B4SEU9 | 324925 | C0ZH35 | 358681 |
| B4SHT7 | 391008 | C0ZYN8 | 234621 |
| B4T6J1 | 423368 | C1A8U3 | 379066 |
| B4TIG4 | 454169 | C1AFI5 | 561275 |
| B4TWQ6 | 439843 | C1B393 | 632772 |
| B4U6J3 | 380749 | C1DJ56 | 322710 |
| B4UHB6 | 447217 | C1DV08 | 204536 |
| B4UHF2 | 447217 | C1EX98 | 572264 |
| B5BL41 | 554290 | C1F6C9 | 240015 |
| B5EGX3 | 404380 | C1FPD9 | 536232 |
| B5ENA1 | 380394 | C3K436 | 216595 |
| B5F744 | 454166 | C3K7V6 | 216595 |
| B5FA64 | 388396 | C3KXG8 | 515621 |
| B5FHF8 | 439851 | C3LC72 | 568206 |
| B5R1Q4 | 550537 | C3LPW8 | 579112 |
| B5RG99 | 550538 | C3MAG8 | 394    |
| B5Y210 | 507522 | C3NUA6 | 593588 |
| B5YGJ4 | 289376 | C3PDH0 | 592021 |
| B5YYC3 | 444450 | C3PGX6 | 548476 |
| B5Z6N2 | 563041 | C3PNE1 | 347255 |
| B5ZTW4 | 395492 | C4K2A3 | 562019 |
| B5ZWT3 | 395492 | C4K4D9 | 572265 |
| B6ENC8 | 316275 | C4KD15 | 85643  |
| B6HYX9 | 409438 | C4KMC0 | 536230 |
| B6IW52 | 414684 | C4LDU8 | 595494 |
| B6JCI8 | 504832 | C4LJ46 | 645127 |

|        |        |        |        |
|--------|--------|--------|--------|
| B6JL92 | 570508 | C4PRA8 | 580049 |
| B6SNS9 | 4577   | C4WZT7 | 484021 |
| B6YQZ6 | 511995 | C4XHA3 | 573370 |
| B7GUF6 | 391904 | C4ZZ73 | 595496 |
| B7GV10 | 557600 | C5AEZ7 | 626418 |
| B7I2B0 | 480119 | C5AUQ9 | 272630 |
| B7IF14 | 484019 | C5BBD4 | 634503 |
| B7IHP8 | 484019 | C5BWM2 | 471853 |
| B7J7X7 | 243159 | C5C9V7 | 465515 |
| B7KNY0 | 440085 | C5CHY0 | 521045 |
| B7L4F3 | 585055 | C5CND4 | 543728 |
| B7LWM1 | 585054 | C5D729 | 471223 |
| B7M0C7 | 585034 | C6A919 | 580050 |
| B7MAF2 | 585035 | C6AB14 | 634504 |
| B7MNN7 | 585397 | C6AF61 | 555970 |
| B7N7Q5 | 585056 | C6AZ03 | 395491 |
| B7NHD5 | 585057 | C6BK76 | 428406 |
| B7UI76 | 574521 | C6BU44 | 526222 |
| B7V1H1 | 557722 | C6C7D1 | 579405 |
| B7VJ13 | 575788 | C6CGK6 | 561229 |
| B8C5E0 | 35128  | C6DHB7 | 561230 |
| B8CKF7 | 225849 | C6DLI2 | 478434 |
| B8CWF1 | 373903 | C6S628 | 662598 |
| B8D005 | 373903 | C6UIQ4 | 413997 |
| B8D751 | 561501 | C6UZU7 | 544404 |
| B8D8U7 | 563178 | C6VRA1 | 644042 |
| B8DJT5 | 883    | C6W7U7 | 471854 |
| B8DT87 | 442563 | C6WAC3 | 446462 |
| B8DWI3 | 442563 | C6WT34 | 583345 |
| B8E4S9 | 407976 | C6X3R8 | 531844 |
| B8EIQ3 | 395965 | C6X8F3 | 582744 |
| B8F8Q1 | 557723 | C6XFN0 | 537021 |
| B8FI97 | 439235 | C6XKY1 | 582402 |
| B8GKG6 | 521011 | C6XYG7 | 485917 |
| B8GNX3 | 396588 | C7C055 | 592205 |
| B8H668 | 565050 | C7C8I1 | 661410 |
| B8HG77 | 452863 | C7JG03 | 634452 |
| B8I6K9 | 394503 | C7LEG1 | 568815 |
| B8I6L5 | 394503 | C7LKJ5 | 595499 |
| B8IC99 | 460265 | C7LN01 | 525897 |
| B8J0P9 | 525146 | C7LY03 | 525909 |
| B8J4D1 | 525146 | C7M779 | 521097 |
| B8JAK0 | 455488 | C7MBD3 | 446465 |
| B8JAN4 | 455488 | C7MVB6 | 471857 |
| B8ZLL9 | 561276 | C7NAR4 | 523794 |
| B9DP24 | 396513 | C7P6F3 | 573064 |



|        |        |        |        |
|--------|--------|--------|--------|
| B9DRX8 | 218495 | C7PKR5 | 485918 |
| B9E4W6 | 583346 | C7QBG7 | 479433 |
| B9E5W4 | 583346 | C7R3G9 | 471856 |
| B9EBZ7 | 458233 | C7RPB8 | 522306 |
| B9J6R4 | 311403 | C7T8R6 | 568703 |
| B9JYQ3 | 311402 | C7TFG1 | 568704 |
| B9K866 | 309803 | C8TL08 | 573235 |
| B9KDT6 | 306263 | C8TYP7 | 585395 |
| B9KJ33 | 320483 | C8UJJ1 | 585396 |
| B9KP40 | 557760 | C8WV8  | 622759 |
| B9KY70 | 309801 | C8WXU3 | 521098 |
| B9KZJ1 | 309801 | C8X410 | 485915 |
| B9L6C6 | 598659 | C8XH43 | 479431 |
| B9LC21 | 480224 | C9RGT5 | 579137 |
| B9LUB3 | 416348 | C9RS69 | 59374  |
| B9M381 | 316067 | C9RUH8 | 544556 |
| B9MH71 | 535289 | C9XMV9 | 645462 |
| B9MRD0 | 521460 | C9Y4V6 | 413502 |
| B9N8M7 | 3694   | C9YPG3 | 645463 |
| C0Q4K5 | 476213 | C9Z0N1 | 680198 |
| C0QFZ5 | 177437 | D0FMZ4 | 79967  |
| C0QU79 | 123214 | D0J7E6 | 688245 |
| C0R175 | 565034 | D0J951 | 600809 |
| C0R2S2 | 66084  | D0JB68 | 331104 |
| C0RMJ0 | 546272 | D0KBL9 | 561231 |
| C0ZCG4 | 358681 | D0LBP8 | 526226 |
| C0ZYG3 | 234621 | D0LTS4 | 502025 |
| C1A410 | 379066 | D0MG97 | 518766 |
| C1AFN6 | 561275 | D0R4B9 | 633699 |
| C1B356 | 632772 | D0Z995 | 498217 |
| C1B6H2 | 632772 | D1AAA7 | 471852 |
| C1CFE0 | 488222 | D1ANM8 | 526218 |
| C1CLQ6 | 488223 | D1ATB2 | 574556 |
| C1CSH7 | 487213 | D1AYT7 | 519441 |
| C1D7H9 | 557598 | D1AYX2 | 525898 |
| C1DFM1 | 322710 | D1B7Q0 | 525903 |
| C1DWF3 | 204536 | D1BJ30 | 446469 |
| C1F656 | 240015 | D1C095 | 446471 |
| C1FL30 | 536232 | D1C945 | 479434 |
| C1FUM4 | 536232 | D1YWV8 | 304371 |
| C3KTL5 | 515621 | D2AZH2 | 479432 |
| C3L287 | 515621 | D2BHI7 | 311424 |
| C3L8Q7 | 568206 | D2BYP5 | 590409 |
| C3LQT6 | 579112 | D2C3R8 | 590168 |
| C3MBY7 | 394    | D2NNR0 | 680646 |
| C3NVK7 | 593588 | D2NVY8 | 653938 |

|        |        |        |        |
|--------|--------|--------|--------|
| C3P5Q2 | 592021 | D2P6X7 | 637381 |
| C3PH06 | 548476 | D2PZC1 | 479435 |
| C3PMI6 | 347255 | D2Q5K6 | 401473 |
| C4K0R8 | 562019 | D2QN21 | 504472 |
| C4K485 | 572265 | D2RGB0 | 572546 |
| C4KV80 | 536230 | D2RNW2 | 591001 |
| C4L2D3 | 360911 | D2RX74 | 543526 |
| C4LCQ1 | 595494 | D2SDR0 | 526225 |
| C4LCT8 | 595494 | D2TV21 | 637910 |
| C4LJ69 | 645127 | D2UF95 | 380358 |
| C4PR39 | 580049 | D3DK68 | 608538 |
| C4T9D7 | 573    | D3DYT5 | 634498 |
| C4XRI5 | 573370 | D3FE58 | 469383 |
| C4Z2K4 | 515620 | D3FYZ9 | 398511 |
| C4ZG59 | 515619 | D3HPP4 | 661367 |
| C4ZPV7 | 595496 | D3NSZ4 | 137722 |
| C5AAZ6 | 626418 | D3PAV2 | 639282 |
| C5ARE3 | 272630 | D3Q6H1 | 446470 |
| C5B7N2 | 634503 | D3QXA1 | 701177 |
| C5BQ31 | 377629 | D3RDI8 | 640131 |
| C5BWQ6 | 471853 | D3RH88 | 640131 |
| C5C9U2 | 465515 | D3RV79 | 572477 |
| C5CDJ7 | 521045 | D3S0G1 | 589924 |
| C5CHX8 | 521045 | D3S6T6 | 644281 |
| C5CJ71 | 543728 | D3SCB6 | 396595 |
| C5D3B9 | 471223 | D3SIJ1 | 633145 |
| C5WQZ8 | 4558   | D3SMD8 | 638303 |
| C6A981 | 580050 | D3T2Y1 | 580331 |
| C6ADF5 | 634504 | D3UFT0 | 679897 |
| C6AFC3 | 555970 | D3UPW8 | 683837 |
| C6AMN0 | 634176 | D3V6I8 | 406818 |
| C6B275 | 395491 | D3VHZ7 | 406817 |
| C6B2X6 | 395491 | D4G844 | 515618 |
| C6BDR0 | 428406 | D4GGN1 | 706191 |
| C6BTW9 | 526222 | D4GW20 | 309800 |
| C6C9F1 | 579405 | D4H4C1 | 522772 |
| C6CJ56 | 561229 | D4HDH9 | 553199 |
| C6CUF6 | 324057 | D4HUK9 | 665029 |
| C6DF00 | 561230 | D4ICJ0 | 716540 |
| C6DX71 | 478434 | D4Z4Q2 | 452662 |
| C6E3G6 | 443144 | D4ZCR3 | 637905 |
| C6E9Q8 | 443144 | D5ASV9 | 272942 |
| C6S997 | 662598 | D5B588 | 637386 |
| C6ULD4 | 413997 | D5BKJ9 | 655815 |
| C6UVL5 | 544404 | D5BML2 | 488538 |
| C6VQJ8 | 644042 | D5CFU1 | 716541 |

|        |        |        |        |
|--------|--------|--------|--------|
| C6VX07 | 471854 | D5CU55 | 580332 |
| C6WDJ5 | 446462 | D5D900 | 641892 |
| C6WXG3 | 583345 | D5DM00 | 592022 |
| C6X3R2 | 531844 | D5DV76 | 545693 |
| C6X470 | 531844 | D5ECU4 | 572547 |
| C6X6X9 | 582744 | D5EJL8 | 583355 |
| C6XHK9 | 537021 | D5EUD3 | 264731 |
| C6XII4 | 582402 | D5H2T4 | 748671 |
| C6XTE2 | 485917 | D5T7Z0 | 423212 |
| C7BJY6 | 553480 | D5TN00 | 714359 |
| C7BZY4 | 592205 | D5U513 | 526224 |
| C7CMB1 | 661410 | D5UDP8 | 446466 |
| C7JC27 | 634452 | D5UMD7 | 521096 |
| C7LJG9 | 568815 | D5V4F8 | 572480 |
| C7LKC2 | 595499 | D5V853 | 749219 |
| C7LNT8 | 525897 | D5VQ30 | 509190 |
| C7LXZ1 | 525909 | D5W9V5 | 640511 |
| C7M8H8 | 521097 | D5WP68 | 562970 |
| C7MBB5 | 446465 | D5X3Z2 | 75379  |
| C7MNH3 | 469378 | D6XWT0 | 439292 |
| C7MQW5 | 471857 | D6Y834 | 469371 |
| C7N470 | 471855 | D6YRW3 | 716544 |
| C7N8S9 | 523794 | D6Z6B6 | 589865 |
| C7NIU9 | 478801 | D6ZEP6 | 640132 |
| C7NV79 | 519442 | D6ZVC2 | 759350 |
| C7P2G0 | 485914 | D7A8U5 | 639283 |
| C7P974 | 573064 | D7APG8 | 583358 |
| C7PCE0 | 485918 | D7AYD7 | 446468 |
| C7QF62 | 479433 | D7D0R8 | 691437 |
| C7QFC0 | 479433 | D7DKX7 | 666681 |
| C7R3E7 | 471856 | D7DTY6 | 456320 |
| C7R906 | 523791 | D7E856 | 644295 |
| C7RKR9 | 522306 | D7FDR3 | 693745 |
| C7T8R0 | 568703 | D7GE64 | 754252 |
| C7TFF4 | 568704 | O25290 | 210    |
| C8TGF9 | 573235 | O27389 | 187420 |
| C8U1A4 | 585395 | O29511 | 2234   |
| C8UG03 | 585396 | O32114 | 1423   |
| C8WA09 | 521095 | O67693 | 63363  |
| C8WBM7 | 622759 | O69969 | 1902   |
| C8WHK4 | 479437 | O84437 | 813    |
| C8WLB0 | 479437 | P44859 | 727    |
| C8WX46 | 521098 | P46357 | 632    |
| C8X0Z7 | 485915 | P46814 | 1769   |
| C8XJD9 | 479431 | P54897 | 103690 |
| C9R3J7 | 668336 | P59582 | 224915 |

|        |        |        |        |
|--------|--------|--------|--------|
| C9RI57 | 579137 | P63897 | 1773   |
| C9RPN4 | 59374  | P63898 | 1765   |
| C9XKA1 | 645462 | Q01XQ8 | 234267 |
| C9XRH5 | 645462 | Q02E84 | 208963 |
| C9XRH8 | 645462 | Q03CV8 | 321967 |
| C9XVJ2 | 413502 | Q03HS7 | 278197 |
| C9YIJ1 | 645463 | Q056W9 | 372461 |
| C9YR68 | 645463 | Q05FG2 | 387662 |
| C9YR71 | 645463 | Q07UV4 | 316055 |
| C9Z238 | 680198 | Q088K8 | 318167 |
| D0FPD8 | 79967  | Q0BWE3 | 228405 |
| D0IX77 | 688245 | Q0I572 | 205914 |
| D0J8Q2 | 600809 | Q0KF42 | 381666 |
| D0JBL4 | 331104 | Q0RDX7 | 326424 |
| D0K4X1 | 681288 | Q0S1N7 | 101510 |
| D0KMM5 | 561231 | Q0SRX8 | 289380 |
| D0L121 | 555778 | Q0SZ00 | 373384 |
| D0L5Y3 | 526226 | Q0TAR6 | 362663 |
| D0LBK6 | 526226 | Q0TPB1 | 195103 |
| D0LJC9 | 502025 | Q0VM18 | 393595 |
| D0MJ85 | 518766 | Q0W3B6 | 351160 |
| D0R4B3 | 633699 | Q11CW3 | 266779 |
| D0ZC37 | 498217 | Q11YU6 | 269798 |
| D1AAE6 | 471852 | Q12EN2 | 296591 |
| D1ANL6 | 526218 | Q12S90 | 318161 |
| D1AU63 | 574556 | Q13DT7 | 316057 |
| D1AYU4 | 519441 | Q146W2 | 266265 |
| D1AZ73 | 525898 | Q15NG5 | 342610 |
| D1B723 | 525903 | Q16C03 | 375451 |
| D1BJ56 | 446469 | Q17XQ0 | 382638 |
| D1C061 | 446471 | Q182T1 | 272563 |
| D1CED2 | 525904 | Q18K13 | 362976 |
| D1YV25 | 304371 | Q1AZV3 | 266117 |
| D2AXU7 | 479432 | Q1BA13 | 164756 |
| D2BI22 | 311424 | Q1BJS1 | 331271 |
| D2BKJ8 | 684738 | Q1BSN5 | 331271 |
| D2BWR0 | 590409 | Q1CBM6 | 360102 |
| D2C3S0 | 590168 | Q1CNH8 | 377628 |
| D2NNS8 | 680646 | Q1CTW0 | 357544 |
| D2Q1N8 | 479435 | Q1D2B4 | 246197 |
| D2Q5Y5 | 401473 | Q1GCS5 | 292414 |
| D2QD79 | 504472 | Q1GPI7 | 117207 |
| D2R4F5 | 530564 | Q1H4X0 | 265072 |
| D2RG37 | 572546 | Q1I303 | 384676 |
| D2RX77 | 543526 | Q1INC7 | 204669 |
| D2SDV2 | 526225 | Q1LS37 | 266264 |

|        |        |        |        |
|--------|--------|--------|--------|
| D2TGL8 | 637910 | Q1LTX0 | 374463 |
| D2UAC7 | 380358 | Q1MAK9 | 216596 |
| D3DFK6 | 608538 | Q1MPX8 | 363253 |
| D3DYX0 | 634498 | Q1QE99 | 335284 |
| D3E7M7 | 481743 | Q1QHJ3 | 323097 |
| D3FE36 | 469383 | Q1QSV1 | 290398 |
| D3HMN3 | 661367 | Q1R4C5 | 364106 |
| D3P5H5 | 137722 | Q1RIT1 | 336407 |
| D3PAV4 | 639282 | Q1WTU5 | 362948 |
| D3QAU9 | 446470 | Q21CU6 | 316056 |
| D3QCX7 | 698737 | Q21SV0 | 338969 |
| D3QVB5 | 701177 | Q253I6 | 264202 |
| D3RCJ3 | 640131 | Q2G8H7 | 279238 |
| D3RUB7 | 572477 | Q2GI52 | 205920 |
| D3S0A3 | 589924 | Q2ING7 | 290397 |
| D3S698 | 644281 | Q2J390 | 316058 |
| D3SBD0 | 396595 | Q2K386 | 347834 |
| D3SJ24 | 633145 | Q2L1A2 | 360910 |
| D3SLK9 | 638303 | Q2LV89 | 56780  |
| D3SZN9 | 547559 | Q2LYC5 | 56780  |
| D3T7X4 | 580331 | Q2NBR6 | 314225 |
| D3UIA9 | 679897 | Q2NE08 | 339860 |
| D3V283 | 406818 | Q2NQF4 | 343509 |
| D3VB50 | 406817 | Q2NYV5 | 342109 |
| D4G8Y0 | 515618 | Q2RV61 | 269796 |
| D4GJN0 | 706191 | Q2S2P2 | 309807 |
| D4GW26 | 309800 | Q2SG43 | 349521 |
| D4H4C3 | 522772 | Q2T269 | 271848 |
| D4HBK2 | 553199 | Q2WAV6 | 342108 |
| D4HF16 | 553199 | Q2Y5Z0 | 323848 |
| D4I0H2 | 665029 | Q2YLR4 | 359391 |
| D4IF21 | 716540 | Q30NW1 | 326298 |
| D4Z2F5 | 452662 | Q310Q1 | 207559 |
| D4ZB83 | 637905 | Q31IM2 | 317025 |
| D5ALX0 | 272942 | Q31UH9 | 300268 |
| D5B0B5 | 637386 | Q329Y5 | 300267 |
| D5BKC0 | 655815 | Q39BE9 | 269483 |
| D5BUA9 | 488538 | Q3ATR0 | 340177 |
| D5C1C6 | 472759 | Q3B1G2 | 319225 |
| D5CH23 | 716541 | Q3BXU3 | 316273 |
| D5CQQ3 | 580332 | Q3IZB6 | 272943 |
| D5D8T4 | 641892 | Q3JEA2 | 323261 |
| D5DBW5 | 592022 | Q3K4R8 | 205922 |
| D5E0F3 | 545693 | Q3KLS0 | 315277 |
| D5EC22 | 547558 | Q3MBA2 | 240292 |
| D5EC79 | 572547 | Q3SFX7 | 292415 |

|        |        |        |        |
|--------|--------|--------|--------|
| D5EJ56 | 583355 | Q3SNW2 | 323098 |
| D5EWH1 | 264731 | Q3YT78 | 269484 |
| D5H2U0 | 748671 | Q3YVF7 | 300269 |
| D5STR2 | 521674 | Q3Z8H4 | 243164 |
| D5T5I2 | 762051 | Q3ZXC7 | 255470 |
| D5T6E9 | 423212 | Q46185 | 1502   |
| D5UAX3 | 526224 | Q476V3 | 264198 |
| D5UD82 | 446466 | Q47JN0 | 159087 |
| D5UM94 | 521096 | Q47RR3 | 269800 |
| D5V5S9 | 572480 | Q48AR8 | 167879 |
| D5V9G8 | 749219 | Q48C02 | 264730 |
| D5VDV8 | 509190 | Q491Z7 | 291272 |
| D5WD67 | 640511 | Q4FP10 | 198252 |
| D5X2V6 | 75379  | Q4FV85 | 259536 |
| D6XUX6 | 439292 | Q4JV83 | 306537 |
| D6Y7X3 | 469371 | Q4K3W2 | 220664 |
| D6YVH2 | 716544 | Q4KDN7 | 220664 |
| D6Z6B8 | 589865 | Q4QME8 | 281310 |
| D6Z922 | 640132 | Q4ULS7 | 42862  |
| D6ZMA7 | 525381 | Q4UYY2 | 314565 |
| D6ZSW0 | 759350 | Q500B6 | 205918 |
| D7A243 | 639283 | Q51564 | 287    |
| D7A7X5 | 639283 | Q54HH7 | 44689  |
| D7AU45 | 583358 | Q55CJ6 | 44689  |
| D7AYA2 | 446468 | Q55CJ7 | 44689  |
| D7CM63 | 643648 | Q55GS8 | 44689  |
| D7DCF5 | 591019 | Q57AW6 | 235    |
| D7DK14 | 666681 | Q57HR0 | 28901  |
| D7DTZ2 | 456320 | Q58519 | 2190   |
| D7EB03 | 644295 | Q5E1W7 | 312309 |
| D7FDJ4 | 693745 | Q5F9Q4 | 242231 |
| D7GEJ4 | 754252 | Q5FCG3 | 254945 |
| O26891 | 187420 | Q5FF25 | 302409 |
| O29353 | 2234   | Q5FKR4 | 1579   |
| O67061 | 63363  | Q5GSB8 | 292805 |
| O84369 | 813    | Q5HCE3 | 254945 |
| O86836 | 1902   | Q5HSQ5 | 195099 |
| P38103 | 287    | Q5KVP4 | 1462   |
| P40110 | 1718   | Q5L6P2 | 83555  |
| P42976 | 1423   | Q5LC04 | 272559 |
| P45153 | 727    | Q5LX66 | 89184  |
| P57867 | 747    | Q5NNL4 | 542    |
| P58210 | 381    | Q5P2V2 | 76114  |
| P58211 | 381    | Q5P9B8 | 234826 |
| P58326 | 382    | Q5QUS6 | 135577 |
| P59474 | 224915 | Q5WDU2 | 66692  |

|        |        |        |        |
|--------|--------|--------|--------|
| P63893 | 158878 | Q5WZH5 | 297245 |
| P63894 | 158879 | Q5X822 | 297246 |
| P63895 | 1313   | Q5YT14 | 37329  |
| P63896 | 171101 | Q5ZYK6 | 272624 |
| P72024 | 1773   | Q60AJ4 | 414    |
| P94844 | 210    | Q62EZ3 | 13373  |
| Q01R26 | 234267 | Q632C7 | 288681 |
| Q02FR3 | 208963 | Q63YH7 | 28450  |
| Q03CW4 | 321967 | Q64SY7 | 817    |
| Q03HT3 | 278197 | Q65FD6 | 279010 |
| Q03M29 | 322159 | Q65RL9 | 221988 |
| Q03YE1 | 203120 | Q66FZ5 | 633    |
| Q04FS0 | 203123 | Q67SX4 | 2734   |
| Q04JJ1 | 373153 | Q68WW4 | 785    |
| Q04U79 | 355277 | Q6A8Z4 | 1747   |
| Q053P2 | 355276 | Q6AE05 | 59736  |
| Q057Y0 | 372461 | Q6AR62 | 84980  |
| Q05FS6 | 387662 | Q6CZG8 | 29471  |
| Q07UT2 | 316055 | Q6F950 | 62977  |
| Q086I8 | 318167 | Q6FYC7 | 803    |
| Q0A7E5 | 187272 | Q6G1L7 | 38323  |
| Q0AER1 | 335283 | Q6LLN5 | 74109  |
| Q0AKB5 | 394221 | Q6ME33 | 264201 |
| Q0AXH2 | 335541 | Q6MRN0 | 959    |
| Q0BIB8 | 339670 | Q6ND59 | 1076   |
| Q0BPE6 | 391165 | Q6NGR6 | 1717   |
| Q0C526 | 228405 | Q71Y02 | 265669 |
| Q0HLM3 | 60480  | Q72AX3 | 882    |
| Q0HY04 | 60481  | Q72YE7 | 222523 |
| Q0I3N1 | 205914 | Q73FW5 | 163164 |
| Q0K6F4 | 381666 | Q73W21 | 1770   |
| Q0K705 | 381666 | Q7M7Q4 | 844    |
| Q0RDT3 | 326424 | Q7MQC1 | 196600 |
| Q0S1S5 | 101510 | Q7MYN5 | 141679 |
| Q0SRS4 | 289380 | Q7NV18 | 536    |
| Q0T8G3 | 373384 | Q7VFH5 | 32025  |
| Q0TLW0 | 362663 | Q7VPN0 | 730    |
| Q0TP54 | 195103 | Q7VRM5 | 203907 |
| Q0VST4 | 393595 | Q7VUL2 | 520    |
| Q0W676 | 351160 | Q7W203 | 519    |
| Q10P67 | 39947  | Q7WQY1 | 518    |
| Q11CB4 | 266779 | Q816D1 | 226900 |
| Q11RZ8 | 269798 | Q81XR2 | 1392   |
| Q122Q1 | 296591 | Q824C6 | 83557  |
| Q12QJ4 | 318161 | Q82KD0 | 33903  |
| Q12ZG1 | 259564 | Q82U84 | 915    |

|        |        |        |        |
|--------|--------|--------|--------|
| Q13E66 | 316057 | Q838I3 | 1351   |
| Q13U79 | 266265 | Q83AD4 | 777    |
| Q15TQ4 | 342610 | Q83PH3 | 623    |
| Q16CE5 | 375451 | Q87DI4 | 183190 |
| Q17XF1 | 382638 | Q87KJ4 | 670    |
| Q17ZX1 | 272563 | Q88CF3 | 160488 |
| Q17ZX4 | 272563 | Q88GD4 | 160488 |
| Q18K16 | 362976 | Q88V90 | 1590   |
| Q1AZV2 | 266117 | Q89X45 | 375    |
| Q1B3R6 | 164756 | Q8AAB7 | 818    |
| Q1B609 | 164756 | Q8D2T4 | 36870  |
| Q1B655 | 164756 | Q8DD81 | 672    |
| Q1B6I9 | 164756 | Q8ENX2 | 182710 |
| Q1BA69 | 164756 | Q8FBN6 | 217992 |
| Q1BZ73 | 331271 | Q8FPE1 | 152794 |
| Q1C0I8 | 360102 | Q8FYF0 | 29461  |
| Q1CMU5 | 377628 | Q8G7Z7 | 216816 |
| Q1CU21 | 357544 | Q8KAX9 | 1097   |
| Q1CZV9 | 246197 | Q8NP73 | 1718   |
| Q1GKJ6 | 292414 | Q8TY71 | 2320   |
| Q1GPH0 | 117207 | Q8UC03 | 176299 |
| Q1H392 | 265072 | Q8Y344 | 305    |
| Q1IF57 | 384676 | Q8Y5N9 | 1639   |
| Q1INQ7 | 204669 | Q8YJF0 | 29459  |
| Q1LIE4 | 266264 | Q929Z7 | 1642   |
| Q1LJ29 | 266264 | Q92I41 | 781    |
| Q1MEY4 | 216596 | Q92L46 | 382    |
| Q1MMY3 | 216596 | Q93H44 | 33903  |
| Q1MRS7 | 363253 | Q97FV2 | 1488   |
| Q1QET4 | 335284 | Q98EB6 | 381    |
| Q1QRT8 | 323097 | Q9A280 | 155892 |
| Q1QSX7 | 290398 | Q9K7F0 | 86665  |
| Q1RGH0 | 364106 | Q9KVL6 | 666    |
| Q1RHE5 | 336407 | Q9PD98 | 2371   |
| Q1WU20 | 362948 | Q9PJW2 | 83560  |
| Q21CH6 | 316056 | Q9PMD8 | 197    |
| Q21H39 | 203122 | Q9X1L0 | 2336   |
| Q220P8 | 338969 | Q9Z833 | 83558  |
| Q24QU8 | 138119 | Q9ZDB7 | 782    |
| Q255G3 | 264202 | Q9ZLR5 | 85963  |
| Q28K08 | 290400 | A0NX08 | 384765 |
| Q2FNQ9 | 323259 | A0Y9E2 | 247633 |
| Q2GCF7 | 279238 | A0Z3C4 | 247639 |
| Q2GH22 | 205920 | A1EP63 | 345076 |
| Q2IGU5 | 290397 | A1F6L5 | 412614 |
| Q2IGX0 | 290397 | A1ZUT8 | 313606 |



|        |        |        |        |
|--------|--------|--------|--------|
| Q2J314 | 316058 | A2P8C0 | 412966 |
| Q2J737 | 106370 | A2PW90 | 412883 |
| Q2K721 | 347834 | A2TUS9 | 313590 |
| Q2KDU1 | 347834 | A2U473 | 313598 |
| Q2KW85 | 360910 | A2VL64 | 348776 |
| Q2LTA0 | 56780  | A2VUK2 | 350702 |
| Q2N7Y2 | 314225 | A2W2B9 | 350702 |
| Q2NHW0 | 339860 | A2W6M9 | 350701 |
| Q2NVY2 | 343509 | A3EMM0 | 345075 |
| Q2P1T1 | 342109 | A3EPU4 | 419542 |
| Q2RJL2 | 264732 | A3GPX0 | 417399 |
| Q2RY36 | 269796 | A3GZK8 | 417400 |
| Q2S3M0 | 309807 | A3HUK5 | 388413 |
| Q2SMM6 | 349521 | A3J518 | 391598 |
| Q2SZ94 | 271848 | A3JWF3 | 388401 |
| Q2YBT6 | 323848 | A3K5H0 | 388399 |
| Q2YJN7 | 359391 | A3L1Y6 | 350704 |
| Q2YXX3 | 273036 | A3LIJ5 | 350703 |
| Q30PD7 | 326298 | A3RPS1 | 342110 |
| Q30ZK7 | 207559 | A3SA00 | 52598  |
| Q31HA5 | 317025 | A3SII1 | 89187  |
| Q326J2 | 300268 | A3SUW3 | 314267 |
| Q32K66 | 300267 | A3UXP4 | 314291 |
| Q39JM8 | 269483 | A3V2L6 | 314232 |
| Q39TG7 | 269799 | A3VGT7 | 314271 |
| Q39Z66 | 269799 | A3VZH0 | 314264 |
| Q3A1U6 | 338963 | A3W9K3 | 237727 |
| Q3ACY8 | 246194 | A3WKF2 | 314276 |
| Q3APL9 | 340177 | A3WTJ1 | 314253 |
| Q3B619 | 319225 | A3X6Z2 | 314262 |
| Q3BUC6 | 316273 | A3XMA0 | 398720 |
| Q3IKQ7 | 326442 | A3Y2W5 | 314290 |
| Q3ISP9 | 348780 | A3YDJ7 | 314277 |
| Q3IYU4 | 272943 | A3YJM4 | 360111 |
| Q3J7E0 | 323261 | A3YSC4 | 360108 |
| Q3JNM7 | 320372 | A3ZCN1 | 360112 |
| Q3KI98 | 205922 | A3ZGD1 | 360110 |
| Q3KLZ2 | 315277 | A4A9F2 | 314285 |
| Q3SJS2 | 292415 | A4AHJ7 | 312284 |
| Q3SW72 | 323098 | A4AQ09 | 313603 |
| Q3YRP2 | 269484 | A4B9F1 | 314283 |
| Q3Z5X9 | 300269 | A4BTZ5 | 314278 |
| Q3Z7V5 | 243164 | A4C2N1 | 313594 |
| Q3ZXV5 | 255470 | A4EGP7 | 391593 |
| Q46DC3 | 269797 | A4F0J3 | 388739 |
| Q46WS0 | 264198 | A4KK04 | 395095 |

|        |        |        |        |
|--------|--------|--------|--------|
| Q46XD7 | 264198 | A4LTV7 | 425067 |
| Q47HI9 | 159087 | A4MWY3 | 374927 |
| Q47RU3 | 269800 | A4N2Y7 | 375432 |
| Q47YI6 | 167879 | A4N7F2 | 375177 |
| Q48E64 | 264730 | A4NF18 | 374928 |
| Q493S0 | 291272 | A4NPD8 | 374933 |
| Q49XJ8 | 342451 | A4NWV8 | 375063 |
| Q4FNQ1 | 198252 | A4TUU7 | 55518  |
| Q4FVQ6 | 259536 | A5F4I6 | 345073 |
| Q4JV62 | 306537 | A5J6J2 | 334802 |
| Q4KIG9 | 220664 | A5KEL2 | 398000 |
| Q4L6A1 | 279808 | A5L4A6 | 391574 |
| Q4QKM7 | 281310 | A5PE46 | 161528 |
| Q4UKE7 | 42862  | A5TPJ6 | 370895 |
| Q4UU71 | 314565 | A5XSH3 | 334803 |
| Q4ZNP9 | 205918 | A5ZC46 | 411901 |
| Q576R4 | 235    | A6A4H1 | 417398 |
| Q57865 | 2190   | A6AF63 | 417397 |
| Q57TJ7 | 28901  | A6AWH1 | 410291 |
| Q5E7N0 | 312309 | A6B528 | 419109 |
| Q5F5Y7 | 242231 | A6BJ94 | 411462 |
| Q5FFT0 | 302409 | A6BX28 | 412420 |
| Q5FKQ8 | 1579   | A6D6V2 | 391591 |
| Q5FSK8 | 442    | A6DCU0 | 391592 |
| Q5GTA6 | 292805 | A6E6D0 | 391613 |
| Q5HAV4 | 254945 | A6EAU6 | 391596 |
| Q5HG24 | 93062  | A6ESV5 | 50743  |
| Q5HPE6 | 176279 | A6F901 | 58051  |
| Q5HWX1 | 195099 | A6FK80 | 351016 |
| Q5L5G4 | 83555  | A6GU48 | 391597 |
| Q5LIV1 | 272559 | A6NZA1 | 411467 |
| Q5LLT7 | 89184  | A6XZR8 | 404974 |
| Q5M154 | 299768 | A6Y5Y9 | 345074 |
| Q5M5P2 | 264199 | A7A8W1 | 411481 |
| Q5NPM9 | 542    | A7AFG2 | 411477 |
| Q5P1G6 | 76114  | A7B0M4 | 411470 |
| Q5PA93 | 234826 | A7GVX7 | 360105 |
| Q5QXL5 | 135577 | A7I0N9 | 360107 |
| Q5V5D5 | 2238   | A7M0Y1 | 411476 |
| Q5X090 | 297245 | A7V2U2 | 411479 |
| Q5X8U7 | 297246 | A7VVM6 | 428125 |
| Q5YSW2 | 37329  | A8E8B9 | 360118 |
| Q5ZZ80 | 272624 | A8RQV0 | 411902 |
| Q607A7 | 414    | A8RQV5 | 411902 |
| Q62H17 | 13373  | A8S7U5 | 411485 |
| Q63QT3 | 28450  | A8TB81 | 314289 |

|        |        |        |        |
|--------|--------|--------|--------|
| Q64ZZ5 | 817    | A8TYW8 | 331869 |
| Q65I50 | 279010 | A8UBP7 | 333990 |
| Q65TY2 | 221988 | A8UN00 | 391603 |
| Q66ER9 | 633    | A8UU47 | 392423 |
| Q67P64 | 2734   | A9CU05 | 411684 |
| Q68XM0 | 785    | A9CX84 | 314608 |
| Q6A5I1 | 1747   | A9DYX0 | 391587 |
| Q6A7P7 | 1747   | A9DZY2 | 391624 |
| Q6ADZ0 | 59736  | A9F9Y7 | 383629 |
| Q6AR64 | 84980  | A9G5C0 | 391619 |
| Q6D0C7 | 29471  | A9HHQ8 | 391595 |
| Q6F6R2 | 62977  | A9K039 | 412021 |
| Q6FZ13 | 803    | A9V9Z1 | 81824  |
| Q6G2G3 | 38323  | A9ZC25 | 373665 |
| Q6G9G5 | 282459 | A9ZZQ3 | 404214 |
| Q6GH12 | 282458 | B0ARN4 | 486624 |
| Q6LUK7 | 74109  | B0G8B3 | 411461 |
| Q6LYR5 | 39152  | B0GKM8 | 404218 |
| Q6MDD8 | 264201 | B0GUK6 | 404217 |
| Q6MRM8 | 959    | B0H953 | 404216 |
| Q6NCX8 | 1076   | B0HL25 | 404215 |
| Q6NGP2 | 1717   | B0HZE4 | 360099 |
| Q72BM6 | 882    | B0NTM7 | 449673 |
| Q73I13 | 163164 | B0PBH6 | 445972 |
| Q73VY3 | 1770   | B0Q4G0 | 486619 |
| Q74GT5 | 35554  | B0QKD3 | 486621 |
| Q7MA63 | 844    | B1B991 | 445337 |
| Q7MNU2 | 196600 | B1BJ14 | 445334 |
| Q7MTF9 | 837    | B1BT63 | 451755 |
| Q7N8W3 | 141679 | B1ERF6 | 502347 |
| Q7NX34 | 536    | B1EZP7 | 486623 |
| Q7TXX0 | 1765   | B1FII7 | 396596 |
| Q7UJD7 | 265606 | B1G3K4 | 396598 |
| Q7VIW7 | 32025  | B1GF36 | 486620 |
| Q7VLM6 | 730    | B1HH03 | 320374 |
| Q7VQK8 | 203907 | B1QDT3 | 445335 |
| Q7W510 | 519    | B1QQT9 | 445336 |
| Q7WGH5 | 518    | B1QW39 | 447214 |
| Q81SU0 | 1392   | B1R8W4 | 451754 |
| Q822G7 | 83557  | B1RI72 | 451756 |
| Q82K82 | 33903  | B1RKY9 | 451757 |
| Q82WP9 | 915    | B1S6P6 | 473819 |
| Q83SQ9 | 623    | B1TAX6 | 396597 |
| Q84CP9 | 216595 | B1URC5 | 486622 |
| Q87EC0 | 183190 | B1V3U2 | 488537 |
| Q87SF5 | 670    | B2EB16 | 486409 |

|        |        |        |        |
|--------|--------|--------|--------|
| Q88DU4 | 160488 | B2H2N6 | 331109 |
| Q88W01 | 1590   | B2N5E6 | 344610 |
| Q891S2 | 1513   | B2NTP2 | 444451 |
| Q89WK2 | 375    | B2P8D9 | 444452 |
| Q8A2I5 | 818    | B2PK61 | 444453 |
| Q8CP95 | 176280 | B2Q4N0 | 471874 |
| Q8D3H6 | 36870  | B3A0Z3 | 478004 |
| Q8DEM0 | 672    | B3ALM4 | 478005 |
| Q8EHS7 | 70863  | B3B7J6 | 478006 |
| Q8F133 | 173    | B3BGA0 | 478008 |
| Q8FLB4 | 217992 | B3C0S4 | 478007 |
| Q8FV07 | 29461  | B3C8K4 | 471870 |
| Q8G526 | 216816 | B3ESH9 | 452471 |
| Q8KBD8 | 1097   | B3HAU8 | 340184 |
| Q8NWS4 | 196620 | B3HY99 | 340197 |
| Q8PXL6 | 2209   | B3IAW8 | 340185 |
| Q8RBI6 | 119072 | B3IH21 | 340186 |
| Q8RQN0 | 152794 | B3J6N0 | 405536 |
| Q8THP0 | 2214   | B3JK41 | 470145 |
| Q8TVG7 | 2320   | B3RRW0 | 10228  |
| Q8UIV8 | 176299 | B3TCQ1 | 455614 |
| Q8XJ55 | 1502   | B3WQU6 | 344601 |
| Q8XVT2 | 305    | B3X3W8 | 358708 |
| Q8YDC8 | 29459  | B3XGF8 | 358709 |
| Q8ZIL6 | 632    | B3XRK0 | 349123 |
| Q92J79 | 781    | B3YFL6 | 439842 |
| Q97GI8 | 1488   | B3YQY6 | 405917 |
| Q9A2L1 | 155892 | B3ZBK0 | 451707 |
| Q9CFC0 | 1360   | B3ZLH7 | 451709 |
| Q9EZ11 | 93061  | B4ABF7 | 454168 |
| Q9KC93 | 86665  | B4AG10 | 536229 |
| Q9KPH7 | 666    | B4BSF6 | 495036 |
| Q9PEC3 | 2371   | B4CW33 | 497964 |
| Q9PIT2 | 197    | B4FQ56 | 4577   |
| Q9PK30 | 83560  | B4VD84 | 465541 |
| Q9X1K8 | 2336   | B4W5R9 | 391600 |
| Q9X6Y9 | 520    | B4WYX4 | 236097 |
| Q9Z6L2 | 83558  | B5C656 | 439846 |
| Q9ZE14 | 782    | B5CH97 | 454165 |
| Q9ZLW6 | 85963  | B5CZ46 | 484018 |
| A0NJU3 | 379360 | B5G787 | 465543 |
| A0NUK6 | 384765 | B5GY97 | 443255 |
| A0PTZ4 | 362242 | B5HF74 | 457429 |
| A0PVI6 | 362242 | B5J0B4 | 391626 |
| A0Q9Q2 | 243243 | B5JD45 | 382464 |
| A0QMW6 | 243243 | B5JX79 | 391615 |

|        |        |        |        |
|--------|--------|--------|--------|
| A0R3T2 | 246196 | B5JYL7 | 391616 |
| A0Y0B3 | 156578 | B5MTH3 | 439847 |
| A0YHG2 | 247633 | B5N4A4 | 440534 |
| A0Z1I8 | 247639 | B5NHM7 | 454167 |
| A1EM33 | 345076 | B5NVU7 | 454231 |
| A1F959 | 412614 | B5P8H4 | 454164 |
| A1KH58 | 410289 | B5PM52 | 465518 |
| A1KHJ7 | 410289 | B5PXL6 | 465516 |
| A1T1R5 | 350058 | B5Q5I6 | 465517 |
| A1T9F6 | 350058 | B5QIF0 | 478547 |
| A1TBL5 | 350058 | B5QQ70 | 486408 |
| A1TBZ7 | 350058 | B5S7L4 | 305    |
| A1TE67 | 350058 | B5SE92 | 564066 |
| A1TF02 | 350058 | B5UPC0 | 405533 |
| A1TGK4 | 350058 | B5V7M9 | 451708 |
| A1UGJ2 | 189918 | B5WAE8 | 516466 |
| A1UIY1 | 189918 | B5WTK7 | 516466 |
| A1UJ27 | 189918 | B6AMF7 | 419541 |
| A1UKS3 | 189918 | B6AUD3 | 314270 |
| A1UMY4 | 189918 | B6B533 | 439496 |
| A1ZZK8 | 313606 | B6BRV9 | 439493 |
| A2BMP4 | 415426 | B6C3A3 | 473788 |
| A2PCP0 | 412966 | B6FV69 | 500632 |
| A2PT94 | 412883 | B6R1X8 | 439495 |
| A2RPW1 | 964    | B6W4A1 | 483217 |
| A2TT27 | 313590 | B6XD12 | 520999 |
| A2U0H9 | 313598 | B6XT80 | 566552 |
| A2UYC1 | 399804 | B6Y6Q3 | 569881 |
| A2VGM3 | 348776 | B6ZPT7 | 502346 |
| A2VGY7 | 348776 | B7AKB0 | 483216 |
| A2VLA9 | 348776 | B7BAG5 | 537006 |
| A2VSY6 | 350702 | B7CYA6 | 557724 |
| A2WCQ1 | 350701 | B7DN20 | 543302 |
| A3CQD6 | 388919 | B7QTH2 | 439497 |
| A3ELC6 | 345075 | B7RE50 | 443254 |
| A3F361 | 535026 | B7RMJ4 | 391589 |
| A3F364 | 1423   | B7WTE4 | 399795 |
| A3F373 | 1423   | B8KD33 | 391586 |
| A3F382 | 535024 | B8KKH4 | 566466 |
| A3GSX1 | 417399 | B8KSV1 | 565045 |
| A3H2G9 | 417400 | B8L8U4 | 391601 |
| A3HZF5 | 388413 | B9AG14 | 483214 |
| A3J4Z3 | 391598 | B9BW48 | 513052 |
| A3J979 | 270374 | B9CI10 | 513053 |
| A3JWE2 | 388401 | B9NV10 | 467661 |
| A3K3W9 | 388399 | B9TEQ5 | 3988   |

|        |        |        |        |
|--------|--------|--------|--------|
| A3L3B7 | 350704 | B9XTX9 | 544405 |
| A3LK00 | 350703 | B9Y073 | 544406 |
| A3Q045 | 164757 | B9Y074 | 544406 |
| A3Q1Z9 | 164757 | C0AA30 | 278957 |
| A3Q474 | 164757 | C0ARX0 | 471881 |
| A3Q4T9 | 164757 | C0ARX1 | 471881 |
| A3Q7B8 | 164757 | C0B4X8 | 470146 |
| A3RS10 | 342110 | C0BSH9 | 547043 |
| A3S8T3 | 52598  | C0CXE0 | 518636 |
| A3SKM6 | 89187  | C0CXE3 | 518636 |
| A3STP6 | 314267 | C0DT95 | 546274 |
| A3TMH7 | 313589 | C0E2L5 | 566549 |
| A3TW10 | 252305 | C0EAG3 | 537013 |
| A3UWR3 | 314291 | C0EJP0 | 546264 |
| A3V318 | 314232 | C0F9X3 | 77037  |
| A3VCD0 | 314271 | C0G7W2 | 595497 |
| A3VZ71 | 314264 | C0VID7 | 525244 |
| A3WFG8 | 237727 | C0VW53 | 548477 |
| A3WPM2 | 314276 | C0WB46 | 563191 |
| A3WSF7 | 314253 | C0WRR2 | 525318 |
| A3XDM2 | 314262 | C0WYX2 | 525325 |
| A3XPF8 | 398720 | C0X6H4 | 491074 |
| A3Y0Q6 | 314290 | C0XH29 | 525327 |
| A3YCC7 | 314277 | C0YF85 | 595498 |
| A3YKG9 | 360111 | C0YJ58 | 525257 |
| A3YQD5 | 360108 | C0Z0S0 | 585517 |
| A3ZF37 | 360112 | C1HTK1 | 469598 |
| A3ZJS5 | 360110 | C1HW98 | 528345 |
| A3ZUG3 | 314230 | C1I657 | 457396 |
| A4AHH7 | 312284 | C1MG58 | 469595 |
| A4AST4 | 313603 | C1NGC4 | 457400 |
| A4BK75 | 314283 | C1V496 | 469382 |
| A4BRX7 | 314278 | C2BP22 | 525264 |
| A4BZ80 | 313594 | C2BYY0 | 525367 |
| A4C5M4 | 87626  | C2C565 | 592313 |
| A4EN49 | 391593 | C2CP13 | 525268 |
| A4EZX4 | 388739 | C2D2Q2 | 525310 |
| A4F3T8 | 36809  | C2DI06 | 525278 |
| A4KFM8 | 395095 | C2DY94 | 525281 |
| A4KFZ7 | 395095 | C2E687 | 525330 |
| A4KK47 | 395095 | C2EFD5 | 525364 |
| A4MF59 | 425067 | C2EMK8 | 525365 |
| A4MZT9 | 374927 | C2EST0 | 525366 |
| A4N3U8 | 375432 | C2EWS1 | 491077 |
| A4NAL3 | 375177 | C2F3R9 | 548485 |
| A4NFE5 | 374928 | C2FAU3 | 525337 |

|        |        |        |        |
|--------|--------|--------|--------|
| A4NIP8 | 374932 | C2FHM5 | 525338 |
| A4NRC1 | 374933 | C2FRQ3 | 525372 |
| A4NZ18 | 375063 | C2GI63 | 548478 |
| A4T2H3 | 350054 | C2GQI0 | 525341 |
| A4T3W9 | 350054 | C2GW60 | 548480 |
| A4T633 | 350054 | C2H0B3 | 525271 |
| A4T760 | 350054 | C2HNU2 | 525306 |
| A4T9E6 | 350054 | C2HT65 | 593585 |
| A4TAK7 | 350054 | C2IU0  | 593586 |
| A4ZH46 | 326425 | C2IED7 | 593589 |
| A5A9S4 | 1774   | C2IX91 | 593590 |
| A5F5N9 | 345073 | C2IYH6 | 417400 |
| A5J930 | 334802 | C2JI59 | 593587 |
| A5KGI3 | 398000 | C2JLI4 | 491075 |
| A5KKP0 | 411460 | C2JTL3 | 525361 |
| A5L5S6 | 391574 | C2KC66 | 491076 |
| A5LCW4 | 406556 | C2KX10 | 585501 |
| A5LL42 | 406557 | C2LKM8 | 525369 |
| A5M083 | 406559 | C2M7N1 | 553178 |
| A5M957 | 406560 | C2MSM1 | 526973 |
| A5MHW6 | 406561 | C2N8G3 | 526980 |
| A5MN42 | 406562 | C2NPR6 | 526970 |
| A5MW91 | 406563 | C2P5N7 | 526967 |
| A5PCR7 | 161528 | C2PM65 | 526971 |
| A5U0W6 | 419947 | C2Q2P9 | 526972 |
| A5U1A5 | 419947 | C2QJ47 | 526968 |
| A5WKU8 | 336982 | C2R062 | 526977 |
| A5WL81 | 336982 | C2RF53 | 526969 |
| A5XV22 | 334803 | C2RUY9 | 526974 |
| A5ZAT1 | 411463 | C2SAU1 | 526975 |
| A5ZN97 | 411459 | C2SS20 | 526976 |
| A6A3C1 | 417398 | C2T7W0 | 526978 |
| A6ABP3 | 417397 | C2TNL3 | 526979 |
| A6ASX9 | 410291 | C2U4F4 | 526981 |
| A6B462 | 419109 | C2UKZ2 | 526982 |
| A6BFW0 | 411462 | C2V2E8 | 526983 |
| A6BHQ4 | 411462 | C2VIT0 | 526984 |
| A6BV25 | 412420 | C2W0V8 | 526985 |
| A6CFA6 | 344747 | C2W0V9 | 526985 |
| A6CRX4 | 161544 | C2WDT1 | 526986 |
| A6D9G0 | 391591 | C2WUK9 | 526987 |
| A6DB77 | 391592 | C2X3P9 | 526988 |
| A6E2I3 | 391613 | C2XIL4 | 526989 |
| A6EIN7 | 391596 | C2Y131 | 526990 |
| A6EPG2 | 50743  | C2YHB2 | 526991 |
| A6EYL6 | 443152 | C2YYE9 | 526992 |

|        |        |        |        |
|--------|--------|--------|--------|
| A6F9K6 | 58051  | C2ZEN3 | 526993 |
| A6FKV8 | 351016 | C2ZW81 | 526994 |
| A6GNF8 | 391597 | C3ACN8 | 526997 |
| A6NV43 | 411467 | C3ASE3 | 526998 |
| A6XUL7 | 404974 | C3B9Q0 | 526999 |
| A7A7F2 | 411481 | C3BRU0 | 527000 |
| A7A9V9 | 411477 | C3C9T3 | 527024 |
| A7B1V2 | 411470 | C3CR54 | 527021 |
| A7B7M1 | 411470 | C3D900 | 527025 |
| A7BD67 | 411466 | C3DS60 | 527026 |
| A7BR58 | 422289 | C3EAD1 | 527027 |
| A7JF58 | 430558 | C3ESG4 | 527023 |
| A7JP24 | 442346 | C3F8Z3 | 527022 |
| A7JWF3 | 272629 | C3FSD1 | 527031 |
| A7V0E9 | 411479 | C3GA10 | 527032 |
| A7VCL6 | 411489 | C3GQU9 | 527029 |
| A7VSZ0 | 428125 | C3H847 | 527030 |
| A7VX18 | 428125 | C3HQL9 | 527028 |
| A8CF58 | 3711   | C3I856 | 527019 |
| A8EID3 | 360118 | C3IR60 | 527020 |
| A8PKP3 | 59196  | C3IYB8 | 550542 |
| A8RUZ5 | 411902 | C3JKA7 | 596309 |
| A8S283 | 411902 | C3PYN3 | 457395 |
| A8SFA7 | 411485 | C3QJF8 | 556258 |
| A8STN5 | 411474 | C3QYL4 | 469590 |
| A8U063 | 331869 | C3R4Z3 | 556260 |
| A8UAQ6 | 333990 | C3SKE2 | 562    |
| A8UKJ9 | 391603 | C3X748 | 556268 |
| A8USA6 | 392423 | C3XD32 | 556269 |
| A8UZ01 | 392423 | C3XKU6 | 556267 |
| A8ZYU5 | 96561  | C4B3I0 | 320390 |
| A9BHL2 | 403833 | C4EXB2 | 521005 |
| A9CWD4 | 411684 | C4F4B0 | 521004 |
| A9DBS9 | 314608 | C4FJG4 | 432331 |
| A9DXZ5 | 391624 | C4FN33 | 546273 |
| A9EAW0 | 391587 | C4HF22 | 547046 |
| A9FJ29 | 383629 | C4IL55 | 632245 |
| A9GNQ6 | 391619 | C4ITD0 | 641140 |
| A9HI76 | 391595 | C4MCM5 | 326425 |
| A9LB44 | 412021 | C4PMT9 | 672161 |
| A9QPC7 | 481448 | C4RDF5 | 219305 |
| A9Z8C6 | 373665 | C4RIV3 | 219305 |
| B0A2J9 | 404214 | C4S2H1 | 349968 |
| B0AM96 | 486624 | C4SGC0 | 349967 |
| B0G382 | 411461 | C4SRG5 | 349966 |
| B0GJR8 | 404218 | C4T339 | 349965 |



|        |        |        |        |
|--------|--------|--------|--------|
| B0GWX0 | 404217 | C4TXV1 | 527012 |
| B0H8K4 | 404216 | C4UCW3 | 527002 |
| B0HGU0 | 404215 | C4UN76 | 527005 |
| B0HRV7 | 360099 | C4UTB7 | 527004 |
| B0MPQ9 | 428128 | C4VI64 | 553209 |
| B0MSX7 | 445970 | C4WJY3 | 641118 |
| B0N3V7 | 445974 | C4YZ75 | 444612 |
| B0NA59 | 411468 | C5EDZ9 | 537937 |
| B0NJJ9 | 411468 | C5EHK8 | 457421 |
| B0NSI4 | 449673 | C5F630 | 537973 |
| B0NXE5 | 411484 | C5NJD9 | 436115 |
| B0P8I0 | 445972 | C5PKV0 | 525373 |
| B0PB22 | 445972 | C5RFH7 | 573061 |
| B0Q264 | 486619 | C5RXV2 | 573062 |
| B0QG82 | 486621 | C5SIP8 | 573065 |
| B0QUF1 | 456298 | C5TBF1 | 573060 |
| B1BIV7 | 445334 | C5TGG8 | 555217 |
| B1BYB3 | 451755 | C5TP14 | 596320 |
| B1EMN6 | 502347 | C5TVE1 | 573059 |
| B1EYJ8 | 486623 | C5URZ8 | 536233 |
| B1FRY1 | 396596 | C5VCL9 | 553207 |
| B1G7K4 | 396598 | C5VT09 | 592027 |
| B1GFK7 | 486620 | C5WB43 | 511693 |
| B1MFF8 | 561007 | C5ZH24 | 357347 |
| B1ML57 | 561007 | C5ZXM8 | 537970 |
| B1N232 | 320374 | C6EG05 | 469008 |
| B1Q6R7 | 445335 | C6HWR9 | 412449 |
| B1QA86 | 445335 | C6ICR7 | 457392 |
| B1QLY0 | 445336 | C6IH46 | 469586 |
| B1QNF4 | 445336 | C6JEJ3 | 457412 |
| B1QXK0 | 447214 | C6L106 | 77133  |
| B1R338 | 451754 | C6M1B8 | 547045 |
| B1RHN9 | 451756 | C6MFM8 | 153948 |
| B1RL47 | 451757 | C6MY21 | 658187 |
| B1S567 | 473819 | C6NUR4 | 637389 |
| B1TGU3 | 396597 | C6PNU2 | 536227 |
| B1UMV1 | 486622 | C6PNU3 | 536227 |
| B1V7F7 | 488537 | C6PQU3 | 536227 |
| B2DYV6 | 453365 | C6PQU4 | 536227 |
| B2E862 | 486409 | C6QFI0 | 582899 |
| B2EAC2 | 486409 | C6QQE5 | 581103 |
| B2H0F3 | 331109 | C6R2G0 | 553201 |
| B2HEG2 | 216594 | C6RAE2 | 553206 |
| B2HLC3 | 216594 | C6RQS2 | 596318 |
| B2HLF2 | 216594 | C6RTZ2 | 661513 |
| B2HLV4 | 216594 | C6SAH3 | 663926 |

|        |        |        |        |
|--------|--------|--------|--------|
| B2HMD7 | 216594 | C6TQH5 | 320371 |
| B2HT97 | 216594 | C6YLU3 | 345072 |
| B2KCB5 | 445932 | C7CPR6 | 565636 |
| B2ND55 | 344610 | C7CWX9 | 565637 |
| B2NWW9 | 444451 | C7DDL7 | 633131 |
| B2PBP0 | 444452 | C7H523 | 411483 |
| B2PMF6 | 444453 | C7JR95 | 634453 |
| B2Q6T3 | 471874 | C7K0G2 | 634454 |
| B3AAC5 | 478004 | C7K378 | 634455 |
| B3AI81 | 478005 | C7KCE7 | 634456 |
| B3B4R2 | 478006 | C7KLR3 | 634457 |
| B3BBT4 | 478008 | C7KW28 | 634458 |
| B3C2M5 | 478007 | C7L5X3 | 634459 |
| B3CA29 | 471870 | C7U4H1 | 565638 |
| B3HIN7 | 340184 | C7UD17 | 565642 |
| B3HXV7 | 340197 | C7UK90 | 565641 |
| B3ICA4 | 340185 | C7UT59 | 565650 |
| B3IQL2 | 340186 | C7V155 | 565640 |
| B3JAR6 | 405536 | C7V8H8 | 565644 |
| B3JK81 | 470145 | C7VHZ3 | 565646 |
| B3WSK2 | 344601 | C7VR34 | 565649 |
| B3X584 | 358708 | C7VYT0 | 565647 |
| B3XJF1 | 358709 | C7WCX2 | 565648 |
| B3XRK6 | 349123 | C7WGV5 | 565643 |
| B3YKF9 | 439842 | C7WSL0 | 565651 |
| B4A3S6 | 454168 | C7WVF4 | 565645 |
| B4AKL2 | 536229 | C7XE84 | 563193 |
| B4ARI8 | 545422 | C7XGF7 | 575595 |
| B4CW36 | 497964 | C7Y2H1 | 575596 |
| B4FH75 | 4577   | C7Y8S6 | 565639 |
| B4FRB7 | 4577   | C8JRM3 | 393124 |
| B4VF10 | 465541 | C8K6X9 | 393125 |
| B4W6A6 | 391600 | C8KBV5 | 393128 |
| B4X4P6 | 236097 | C8N6K0 | 638300 |
| B5BW65 | 439846 | C8NPE5 | 196164 |
| B5C8J1 | 454165 | C8PV24 | 553217 |
| B5CL60 | 471875 | C8QCW6 | 592316 |
| B5CNW7 | 471875 | C8RTL6 | 525262 |
| B5CTW3 | 484018 | C8RWV3 | 371731 |
| B5GIM9 | 465543 | C8SSI8 | 536019 |
| B5H1S8 | 443255 | C8T0I1 | 667127 |
| B5HE40 | 457429 | C9D144 | 644076 |
| B5HEU6 | 457429 | C9KW45 | 483215 |
| B5I6U8 | 463191 | C9LFU7 | 626522 |
| B5IZ69 | 391626 | C9MEM8 | 656913 |
| B5JGR1 | 382464 | C9MFE2 | 656912 |

|        |        |        |        |
|--------|--------|--------|--------|
| B5JRY5 | 391615 | C9MWZ2 | 634994 |
| B5K5N7 | 391616 | C9NBC7 | 591167 |
| B5MLA1 | 439847 | C9NLU7 | 675814 |
| B5MV26 | 440534 | C9POS0 | 675813 |
| B5N7S8 | 454167 | C9PAI5 | 675811 |
| B5NM76 | 454231 | C9PM03 | 667128 |
| B5P5Y1 | 454164 | C9Q2S5 | 675810 |
| B5PI04 | 465518 | C9QBS4 | 675816 |
| B5PVD9 | 465516 | C9QWE3 | 536056 |
| B5Q2H5 | 465517 | C9T3T3 | 520459 |
| B5QI72 | 478547 | C9TD19 | 520460 |
| B5QQ64 | 486408 | C9TP23 | 520463 |
| B5RVS6 | 305    | C9TVS2 | 520461 |
| B5SI80 | 564066 | C9U641 | 520454 |
| B5WHW2 | 516466 | C9UFB6 | 520452 |
| B6AUZ5 | 314270 | C9UPK4 | 520451 |
| B6BEZ8 | 439496 | C9UUJ6 | 520450 |
| B6BI09 | 439483 | C9VC44 | 520456 |
| B6BRK7 | 439493 | C9VIG1 | 520457 |
| B6BWT4 | 314607 | C9VWA1 | 520455 |
| B6C561 | 473788 | C9X0F3 | 604162 |
| B6FRG5 | 500632 | C9XAF4 | 568708 |
| B6FY63 | 500633 | C9Y7F4 | 667019 |
| B6FY65 | 500633 | D0AY82 | 575591 |
| B6R1W0 | 439495 | D0B3I0 | 224914 |
| B6TBG3 | 4577   | D0BEK7 | 520488 |
| B6TNS3 | 4577   | D0BWM7 | 575564 |
| B6VXM3 | 483217 | D0CBH2 | 575584 |
| B6WT30 | 411464 | D0CRZ0 | 644107 |
| B6XA20 | 520999 | D0D3I1 | 501479 |
| B6XFS4 | 520999 | D0DEW3 | 575597 |
| B6XVB3 | 566552 | D0DRF8 | 575599 |
| B6Y899 | 569881 | D0GCX0 | 520465 |
| B6ZSJ1 | 502346 | D0GLI4 | 596323 |
| B7AM63 | 483216 | D0GWF8 | 675806 |
| B7AS81 | 483218 | D0H1B0 | 675807 |
| B7B5Y2 | 537006 | D0HAY3 | 675820 |
| B7CLK9 | 557724 | D0HKW3 | 675808 |
| B7DPU3 | 543302 | D0HVR7 | 675809 |
| B7EB68 | 39947  | D0I356 | 675812 |
| B7ESW8 | 39947  | D0IMG8 | 675815 |
| B7QSY9 | 439497 | D0ISR4 | 290847 |
| B7R6L7 | 391606 | D0JJK3 | 637382 |
| B7RE48 | 443254 | D0JTM9 | 637385 |
| B7RKS3 | 391589 | D0JZV0 | 684950 |
| B7S1Z6 | 247634 | D0P9D6 | 520489 |

|        |        |        |        |
|--------|--------|--------|--------|
| B7S2E4 | 247634 | D0PM18 | 520487 |
| B7X378 | 399795 | D0RKA5 | 437701 |
| B8AGP3 | 39946  | D0S155 | 575585 |
| B8AK10 | 39946  | D0SBU7 | 575586 |
| B8GKG4 | 521011 | D0SK96 | 575587 |
| B8KAG8 | 391586 | D0SWR1 | 575588 |
| B8KWU8 | 565045 | D0T4W5 | 575589 |
| B8KYP4 | 391601 | D0TIE1 | 469589 |
| B8LM55 | 3332   | D0TNY7 | 469588 |
| B9AEG3 | 483214 | D0W4N6 | 546262 |
| B9B993 | 513051 | D0W824 | 546265 |
| B9BXI4 | 513052 | D0WTN0 | 674977 |
| B9CJL4 | 513053 | D0XB20 | 673519 |
| B9CKR7 | 553184 | D0XJ63 | 633149 |
| B9CRV4 | 553212 | D0ZNS4 | 588858 |
| B9CYY0 | 553218 | D1A0H3 | 406984 |
| B9HGA9 | 3694   | D1CU47 | 520449 |
| B9I4G3 | 3694   | D1D4K7 | 528346 |
| B9NTS8 | 467661 | D1DBI9 | 528352 |
| B9R006 | 244592 | D1DHW1 | 528354 |
| B9XSF7 | 320771 | D1DN03 | 528356 |
| B9XWD0 | 544405 | D1DUT3 | 528355 |
| B9Y1E8 | 544406 | D1E1B7 | 528358 |
| B9Z4Q3 | 279714 | D1E7P4 | 528359 |
| C0AZ29 | 471881 | D1EE37 | 528360 |
| C0BAM7 | 470146 | D1ENY7 | 520462 |
| C0BJJ0 | 487796 | D1F082 | 520464 |
| C0BRV7 | 547043 | D1F565 | 520466 |
| C0BYQ6 | 553973 | D1FGD9 | 520458 |
| C0BZL9 | 553973 | D1JPE9 | 469587 |
| C0CJV1 | 476272 | D1JXU5 | 457391 |
| C0D118 | 518636 | D1KD54 | 655186 |
| C0D1J1 | 518636 | D1P2X2 | 500637 |
| C0DX90 | 546274 | D1PHW6 | 537011 |
| C0EF07 | 537013 | D1Q3G8 | 547047 |
| C0ERH7 | 546264 | D1Q5T5 | 545431 |
| C0EZF8 | 411469 | D1RI90 | 638315 |
| C0FAC7 | 77037  | D1RNA9 | 682634 |
| C0FNL5 | 622312 | D1RXY0 | 682634 |
| C0N5R5 | 637616 | D1SAF7 | 644283 |
| C0VIV4 | 525244 | D1T0B5 | 643561 |
| C0VLV4 | 525244 | D1U0N8 | 687916 |
| C0VVI4 | 548477 | D1UBQ7 | 643562 |
| C0W7E1 | 525246 | D1UFK3 | 640510 |
| C0WKPO | 525260 | D1WVM8 | 649189 |
| C0WRR8 | 525318 | D1XHE5 | 647653 |

|        |        |        |        |
|--------|--------|--------|--------|
| C0WYW6 | 525325 | D1YCN5 | 679194 |
| C0XH35 | 525327 | D1YPZ9 | 686660 |
| C0XSF8 | 525263 | D2ABY2 | 591020 |
| C0Y6N2 | 595498 | D2F274 | 585543 |
| C0Z0S6 | 585517 | D2LAK6 | 644968 |
| C1ALR0 | 561275 | D2LCK1 | 648757 |
| C1AM50 | 561275 | D2M248 | 649639 |
| C1B278 | 632772 | D2MFM5 | 652103 |
| C1B4F2 | 632772 | D2MUQ9 | 683082 |
| C1DCP4 | 557598 | D2MWB4 | 683083 |
| C1HPI3 | 469598 | D2NDM9 | 431946 |
| C1H0A7 | 528345 | D2TCR7 | 644651 |
| C1I600 | 457396 | D2TWV3 | 638    |
| C1MCE0 | 469595 | D2YCP4 | 671074 |
| C1MYX7 | 564608 | D2YT21 | 671076 |
| C1NBX5 | 457400 | D2Z026 | 58340  |
| C1PF16 | 345219 | D2ZMD0 | 500639 |
| C1V499 | 469382 | D2ZNL3 | 521002 |
| C2BNZ6 | 525264 | D2ZUS1 | 546266 |
| C2CAF6 | 592313 | D3A2V0 | 546268 |
| C2CNY4 | 525268 | D3C679 | 648999 |
| C2D2Q9 | 525310 | D3D4N2 | 102897 |
| C2DN61 | 525281 | D3FP06 | 567106 |
| C2E693 | 525330 | D3H421 | 216592 |
| C2E969 | 525362 | D3LQU2 | 596312 |
| C2EF47 | 525364 | D3MCM1 | 679195 |
| C2EML4 | 525365 | D3MKJ6 | 686659 |
| C2ESS3 | 525366 | D3MV28 | 547146 |
| C2EWS7 | 491077 | D3N760 | 640512 |
| C2F3S5 | 548485 | D3R6B5 | 552531 |
| C2FAU9 | 525337 | D3UUP7 | 634464 |
| C2FIE4 | 525338 | D4BE39 | 500640 |
| C2FRS2 | 525372 | D4BND6 | 518634 |
| C2GC84 | 548473 | D4C3Z6 | 521000 |
| C2GIA2 | 548478 | D4CDB6 | 411486 |
| C2GQH4 | 525341 | D4CP29 | 608534 |
| C2GTG2 | 548480 | D4DPB0 | 546263 |
| C2GUU9 | 548480 | D4E035 | 667129 |
| C2HNU8 | 525306 | D4EPC3 | 699185 |
| C2HW00 | 593585 | D4EYP1 | 699186 |
| C2I523 | 593586 | D4F9V4 | 500638 |
| C2IID5 | 593589 | D4FGQ7 | 679188 |
| C2IRW5 | 593590 | D4G0X5 | 645657 |
| C2J789 | 417400 | D4JYF3 | 718252 |
| C2JFL3 | 593587 | D4KBN1 | 657322 |
| C2JTM1 | 525361 | D4MER1 | 657310 |

|        |        |        |        |
|--------|--------|--------|--------|
| C2KC72 | 491076 | D4MSP7 | 245012 |
| C2KKV2 | 586220 | D4PN22 | 393117 |
| C2KNJ1 | 585199 | D4PV74 | 393131 |
| C2LNI8 | 525369 | D4Q330 | 401650 |
| C2LTS7 | 596322 | D4SBJ5 | 585531 |
| C2M0I3 | 629742 | D4SQ79 | 427081 |
| C2M1X7 | 553178 | D4SUH7 | 427081 |
| C2PTS2 | 526972 | D4T8Z4 | 427082 |
| C2Q9R8 | 526968 | D4V0E7 | 791166 |
| C2SHM6 | 526976 | D4V9C3 | 702446 |
| C2TV30 | 526981 | D4VH65 | 702447 |
| C2V9K0 | 526984 | D4WM68 | 702443 |
| C2XRR9 | 526990 | D4WYW5 | 702444 |
| C2Z5N7 | 526993 | D4X4W0 | 742159 |
| C2ZMA3 | 526994 | D4XSH0 | 707232 |
| C3A3T0 | 526997 | D4Y9C0 | 634956 |
| C3AJQ0 | 526998 | D4YMF1 | 585530 |
| C3JKI5 | 596309 | D4YRH5 | 585524 |
| C3JMU0 | 596309 | D5AX04 | 449216 |
| C3Q4J5 | 457395 | D5D586 | 714962 |
| C3REC7 | 556260 | D5H923 | 761659 |
| C3RLL3 | 556270 | D5MIL0 | 671143 |
| C3TRE2 | 562    | D5N1M4 | 703612 |
| C3X6F0 | 556268 | D5NM52 | 243261 |
| C3XCM0 | 556269 | D5NUH2 | 649754 |
| C3XFZ3 | 613026 | D5PIL6 | 525368 |
| C3XJV5 | 556267 | D5PMK7 | 525370 |
| C4AP03 | 320390 | D5Q255 | 525259 |
| C4F1W1 | 521005 | D5QCE4 | 714995 |
| C4F5Q9 | 521004 | D5QPX3 | 595536 |
| C4FDZ3 | 518635 | D5R8I5 | 642492 |
| C4G654 | 592010 | D5RHB4 | 525371 |
| C4G893 | 626523 | D5RX59 | 525258 |
| C4GHW4 | 629741 | D5SCN1 | 762948 |
| C4H1M7 | 547047 | D5TI87 | 573236 |
| C4HJB1 | 547046 | D5W033 | 758678 |
| C4IIZ5 | 632245 | D5XX56 | 515617 |
| C4IWK6 | 641140 | D5Y7K3 | 520141 |
| C4PMM0 | 672161 | D5YKV6 | 520140 |
| C4RD81 | 219305 | D5YUJ7 | 515616 |
| C4RWG3 | 349968 | D5Z6Q4 | 537209 |
| C4SDA1 | 349967 | D5ZJQ4 | 537210 |
| C4SIW2 | 349966 | D5ZT11 | 566461 |
| C4T7L0 | 349965 | D6AS89 | 457431 |
| C4T9G8 | 573    | D6BA75 | 457425 |
| C4U0R7 | 527012 | D6CV77 | 426114 |

|        |        |        |        |
|--------|--------|--------|--------|
| C4U9J1 | 527002 | D6D4K7 | 657309 |
| C4UL35 | 527005 | D6DBA2 | 722911 |
| C4UXT2 | 527004 | D6DEQ4 | 717608 |
| C4V3Y9 | 638302 | D6DP58 | 718254 |
| C4WAV6 | 596319 | D6EP80 | 457428 |
| C4WGN3 | 641118 | D6FJU9 | 611303 |
| C4X337 | 484021 | D6FND2 | 611304 |
| C4ZKG5 | 85643  | D6GCP5 | 469608 |
| C5E842 | 537937 | D6GP91 | 469608 |
| C5EAS9 | 537937 | D6HB90 | 528348 |
| C5EJK6 | 457421 | D6I365 | 550672 |
| C5EU99 | 457421 | D6IG44 | 550676 |
| C5EYX2 | 537972 | D6IWP4 | 656380 |
| C5F624 | 537973 | D6JHC4 | 550677 |
| C5N5F6 | 450394 | D6JNA0 | 528351 |
| C5N7J2 | 436115 | D6JSY3 | 575565 |
| C5NUT9 | 546270 | D6K3D1 | 645465 |
| C5PKT1 | 525373 | D6KJW7 | 457416 |
| C5Q053 | 548474 | D6KQD6 | 450749 |
| C5Q931 | 525374 | D6KXY5 | 641147 |
| C5QJ27 | 548475 | D6LQF3 | 520448 |
| C5QSD0 | 525378 | D6MCC9 | 536227 |
| C5QX06 | 525376 | D6SLZ9 | 555779 |
| C5RCN1 | 585506 | D6UJP4 | 585535 |
| C5RQP3 | 573061 | D6V142 | 666684 |
| C5RTE4 | 573062 | D6VHS1 | 596153 |
| C5RTN9 | 573062 | D6XAV5 | 463191 |
| C5S265 | 637911 | D6XPG0 | 637913 |
| C5TCL1 | 573060 | D6YDJ5 | 707184 |
| C5TEJ6 | 555217 | D6YFN9 | 707185 |
| C5TKI0 | 596320 | D6YIA6 | 707186 |
| C5TW33 | 573059 | D6YKY1 | 707187 |
| C5UA40 | 509193 | D6YMP3 | 707183 |
| C5UBF3 | 509193 | D6YYB8 | 718219 |
| C5URK7 | 536233 | D7CA85 | 749414 |
| C5V752 | 395494 | D7DDQ2 | 759363 |
| C5VCP5 | 553207 | D7DH27 | 759364 |
| C5VGE5 | 553174 | D7EV68 | 515615 |
| C5VTQ5 | 592027 | D7H046 | 520453 |
| C5W1Z3 | 511693 | D7HSL1 | 412967 |
| C5ZCF4 | 357347 | D7I6G6 | 693985 |
| C5ZY79 | 537970 | D7II93 | 469585 |
| C6A8N2 | 580050 | D7IVX5 | 469592 |
| C6AJ90 | 555970 | D7J762 | 585544 |
| C6DVN8 | 478434 | D7JGK6 | 575590 |
| C6DWG4 | 478434 | D7JVR8 | 656379 |

|        |        |        |        |
|--------|--------|--------|--------|
| C6EB22 | 469008 | D7K9E1 | 457390 |
| C6I2T4 | 457392 | D7N1D2 | 641149 |
| C6IIM9 | 469586 | O05322 | 294    |
| C6JE57 | 457412 | Q05KS1 | 1396   |
| C6LB89 | 478749 | Q08NY3 | 378806 |
| C6M3K8 | 547045 | Q0FDI0 | 367336 |
| C6MHN9 | 153948 | Q0FIU2 | 314265 |
| C6MVY7 | 443143 | Q0G537 | 314231 |
| C6MWF2 | 443143 | Q1N419 | 207949 |
| C6N249 | 658187 | Q1NGC0 | 314266 |
| C6PQF8 | 536227 | Q1NP11 | 262489 |
| C6PQL1 | 536227 | Q1NRT7 | 262489 |
| C6PUK4 | 536227 | Q1NYP8 | 374675 |
| C6PZ64 | 536227 | Q1V113 | 314261 |
| C6QFG9 | 582899 | Q1V618 | 314288 |
| C6QSG9 | 581103 | Q1VXI7 | 313595 |
| C6R2H6 | 553201 | Q1YDS2 | 287752 |
| C6RAG6 | 553206 | Q1YSU8 | 314287 |
| C6RHQ9 | 553219 | Q1YY73 | 314280 |
| C6RJC8 | 596318 | Q1ZDC8 | 314282 |
| C6S2K9 | 661513 | Q1ZLA3 | 314292 |
| C6SC11 | 663926 | Q26EQ0 | 156586 |
| C6SHG4 | 295996 | Q28VM7 | 290400 |
| C6TYA7 | 320371 | Q29XU8 | 197    |
| C6YG47 | 345072 | Q2C2Q2 | 121723 |
| C6YTA1 | 539329 | Q2CK90 | 314256 |
| C6YZI3 | 457394 | Q2FSY3 | 323259 |
| C6ZDI8 | 1288   | Q2J775 | 106370 |
| C7DDA5 | 633131 | Q2PY11 | 360423 |
| C7GAJ2 | 536231 | Q3EZF0 | 339854 |
| C7H7M8 | 411483 | Q3RBF8 | 155920 |
| C7HHP5 | 572545 | Q3RHE4 | 155919 |
| C7HIS3 | 572545 | Q40JB0 | 332415 |
| C7HL89 | 588857 | Q4ED36 | 307502 |
| C7HN48 | 588857 | Q4EHD0 | 267410 |
| C7IFT9 | 588581 | Q4EQE1 | 267409 |
| C7IM98 | 588581 | Q4HDX9 | 306254 |
| C7IQ80 | 589861 | Q4HQC0 | 306264 |
| C7JK68 | 634453 | Q4MR97 | 269801 |
| C7JUD6 | 634454 | Q540H4 | 1718   |
| C7K4M8 | 634455 | Q6J694 | 158899 |
| C7KDU7 | 634456 | Q7PBT8 | 272951 |
| C7KN63 | 634457 |        |        |
| C7KXH8 | 634458 |        |        |
| C7L7A2 | 634459 |        |        |
| C7SZQ3 | 668607 |        |        |



|        |        |
|--------|--------|
| C7XFL4 | 563193 |
| C7XGG3 | 575595 |
| C7XU16 | 575594 |
| C7Y2G5 | 575596 |
| C7ZX04 | 585143 |
| C8A3U1 | 585145 |
| C8ABS0 | 585146 |
| C8AKT0 | 585153 |
| C8ART6 | 585158 |
| C8KPH0 | 452948 |
| C8KW82 | 455227 |
| C8KWV7 | 591023 |
| C8L4M3 | 553565 |
| C8LCL5 | 553567 |
| C8LK17 | 553568 |
| C8LVE6 | 553571 |
| C8M343 | 553573 |
| C8M623 | 553581 |
| C8ME60 | 553583 |
| C8MKP3 | 553588 |
| C8MVR3 | 553592 |
| C8N5H0 | 553596 |
| C8N7S6 | 638300 |
| C8NPH3 | 196164 |
| C8NU10 | 585529 |
| C8P351 | 525280 |
| C8PF81 | 553220 |
| C8PZ29 | 553217 |
| C8QA86 | 592316 |
| C8RTN9 | 525262 |
| C8RXG0 | 371731 |
| C8SQA9 | 536019 |
| C8SQI4 | 536019 |
| C8TBJ5 | 667127 |
| C9CZ14 | 644076 |
| C9KK12 | 500635 |
| C9L413 | 537007 |
| C9LH89 | 626522 |
| C9LRG0 | 546271 |
| C9MOD3 | 585520 |
| C9MCR2 | 656913 |
| C9MJN2 | 656912 |
| C9MP29 | 649761 |
| C9MUA8 | 634994 |
| C9NH53 | 591167 |
| C9NNS1 | 675814 |

|        |        |
|--------|--------|
| C9P2D0 | 675813 |
| C9P9W0 | 675811 |
| C9PQP8 | 667128 |
| C9PX53 | 619693 |
| C9Q6I9 | 675810 |
| C9QMS8 | 675816 |
| C9QSC1 | 536056 |
| C9T2F1 | 520459 |
| C9TBN9 | 520460 |
| C9TIQ9 | 520463 |
| C9TZT3 | 520461 |
| C9U8J9 | 520454 |
| C9UH88 | 520452 |
| C9URX6 | 520451 |
| C9V3D9 | 520450 |
| C9V4G3 | 520456 |
| C9VGJ4 | 520457 |
| C9VMR8 | 520455 |
| C9X289 | 604162 |
| C9X5J9 | 568708 |
| C9YDD2 | 667019 |
| D0AUT7 | 575591 |
| D0B887 | 224914 |
| D0BFN3 | 520488 |
| D0C441 | 575564 |
| D0CFA0 | 575584 |
| D0CTV5 | 644107 |
| D0D6L8 | 501479 |
| D0DEW9 | 575597 |
| D0DRF2 | 575599 |
| D0G9Q1 | 520465 |
| D0GLW1 | 596323 |
| D0GQU3 | 675806 |
| D0H536 | 675807 |
| D0HHB1 | 675820 |
| D0HSJ7 | 675808 |
| D0HV70 | 675809 |
| D0I805 | 675812 |
| D0IM13 | 675815 |
| D0ISW9 | 290847 |
| D0JEJ3 | 637382 |
| D0JNN1 | 637385 |
| D0K002 | 684950 |
| D0L3Q3 | 526226 |
| D0L8V6 | 526226 |
| D0P814 | 520489 |
| D0PHB9 | 520487 |
| D0RFL8 | 437701 |
| D0RQL3 | 684719 |

|        |        |
|--------|--------|
| D0RSX4 | 469609 |
| D0S564 | 575585 |
| D0SFF0 | 575586 |
| D0SP42 | 575587 |
| D0SXEO | 575588 |
| D0T811 | 575589 |
| D0TJG8 | 469589 |
| D0W2C5 | 546262 |
| D0W9Z5 | 546265 |
| D0WHJ1 | 649764 |
| D0WR09 | 649743 |
| D0X0B6 | 674977 |
| D0X7E6 | 673519 |
| D0YQH1 | 596328 |
| D0YZY4 | 675817 |
| D0ZJN3 | 588858 |
| D0ZYX1 | 406984 |
| D1CZN5 | 520449 |
| D1D676 | 528346 |
| D1DE05 | 528352 |
| D1DKF3 | 528354 |
| D1DS40 | 528356 |
| D1DYK3 | 528355 |
| D1E524 | 528358 |
| D1E624 | 528359 |
| D1EHW5 | 528360 |
| D1EK63 | 520462 |
| D1EVK8 | 520464 |
| D1F2J5 | 520466 |
| D1FB55 | 520458 |
| D1GU93 | 663951 |
| D1JQH6 | 469587 |
| D1K2J2 | 457391 |
| D1NHD1 | 456482 |
| D1NIS0 | 492476 |
| D1NJ17 | 492476 |
| D1NTB8 | 561180 |
| D1P1P1 | 500637 |
| D1P6N5 | 500637 |
| D1PGA2 | 537011 |
| D1PTF5 | 585502 |
| D1Q548 | 545431 |
| D1QDL7 | 553594 |
| D1QLW5 | 553601 |
| D1QRV9 | 649760 |
| D1QX78 | 553574 |
| D1RDQ3 | 638315 |
| D1RWW9 | 682634 |
| D1SA92 | 644283 |
| D1SVD2 | 643561 |
| D1TUL0 | 687916 |
| D1UAC0 | 643562 |
| D1USU6 | 640510 |
| D1VB83 | 298654 |

|        |        |
|--------|--------|
| D1VCU6 | 298654 |
| D1VJZ2 | 298654 |
| D1VYZ2 | 679189 |
| D1W2X5 | 679190 |
| D1WNM5 | 596317 |
| D1X905 | 649189 |
| D1XUY4 | 647653 |
| D1XWE6 | 553171 |
| D1Y1I3 | 352165 |
| D1Y8U0 | 679194 |
| D1YDS2 | 679194 |
| D2AHR2 | 591020 |
| D2AYE0 | 479432 |
| D2EWN3 | 585543 |
| D2F6V4 | 585149 |
| D2FD00 | 585151 |
| D2FLT1 | 585152 |
| D2FV85 | 585159 |
| D2G1Q7 | 585160 |
| D2GAK6 | 585161 |
| D2GG37 | 585148 |
| D2GRE6 | 585150 |
| D2L1J5 | 644968 |
| D2LAR6 | 648757 |
| D2LTT8 | 649639 |
| D2ME05 | 652103 |
| D2MR57 | 683082 |
| D2N0L2 | 683083 |
| D2N723 | 523796 |
| D2NAY5 | 431946 |
| D2T4F4 | 644651 |
| D2TW83 | 638    |
| D2UM17 | 585155 |
| D2US14 | 585147 |
| D2Y997 | 671074 |
| D2YMI1 | 671076 |
| D2Z5Z0 | 469381 |
| D2Z9P7 | 500639 |
| D2ZQ44 | 521002 |
| D2ZWP3 | 546266 |
| D3AE01 | 566550 |
| D3BWB2 | 653733 |
| D3CGF9 | 648999 |
| D3CVP2 | 102897 |
| D3D7B0 | 102897 |
| D3EWD8 | 703339 |
| D3FLI0 | 567106 |
| D3H3B7 | 216592 |
| D3HX29 | 575611 |
| D3I2Q2 | 575612 |
| D3IC55 | 575614 |
| D3ILZ8 | 575615 |
| D3L8Q7 | 655225 |
| D3LMN9 | 596312 |

|        |        |
|--------|--------|
| D3M5R5 | 656024 |
| D3MCS6 | 679195 |
| D3MGI5 | 679195 |
| D3MIC4 | 686659 |
| D3MP45 | 686659 |
| D3MW04 | 547146 |
| D3N408 | 640512 |
| D3NKY5 | 663278 |
| D3R5W5 | 552531 |
| D3R6I7 | 552531 |
| D3UUH8 | 634464 |
| D4BF18 | 500640 |
| D4BMW2 | 518634 |
| D4C1H7 | 521000 |
| D4CA90 | 411486 |
| D4CSC8 | 546275 |
| D4DMS8 | 546263 |
| D4DXB7 | 667129 |
| D4EBN8 | 694569 |
| D4F213 | 500638 |
| D4FGR3 | 679188 |
| D4FIU9 | 525375 |
| D4FY15 | 645657 |
| D4J0K0 | 657324 |
| D4JC30 | 717962 |
| D4JM27 | 657317 |
| D4JSV0 | 657319 |
| D4K4E2 | 718252 |
| D4K6B8 | 657322 |
| D4KDR2 | 657316 |
| D4KNP3 | 657315 |
| D4KVB5 | 718255 |
| D4L874 | 657321 |
| D4LEM1 | 213810 |
| D4LKN0 | 657323 |
| D4LQA1 | 657314 |
| D4LZ16 | 657313 |
| D4M7J4 | 651822 |
| D4MMF8 | 717961 |
| D4MPE7 | 245012 |
| D4MZG3 | 245018 |
| D4S161 | 511680 |
| D4S502 | 585503 |
| D4SCH2 | 585531 |
| D4SHL4 | 585531 |
| D4SHS1 | 585531 |
| D4SRM6 | 427081 |
| D4T8N0 | 427082 |
| D4U0J4 | 649742 |
| D4UAC8 | 553590 |
| D4UEW4 | 553580 |
| D4V3P4 | 702446 |
| D4X888 | 742159 |
| D4XKU2 | 707232 |

|        |        |
|--------|--------|
| D4XL90 | 707232 |
| D4Y2C7 | 634956 |
| D4YII0 | 655812 |
| D4YMC1 | 585530 |
| D4YRI2 | 585524 |
| D5AW69 | 449216 |
| D5CUW1 | 714962 |
| D5H845 | 761659 |
| D5HHC7 | 751585 |
| D5N528 | 703612 |
| D5NJR0 | 243261 |
| D5NUE3 | 649754 |
| D5P798 | 525368 |
| D5P9C8 | 525368 |
| D5P9F2 | 525368 |
| D5PAK0 | 525368 |
| D5PAP6 | 525368 |
| D5PEZ9 | 525368 |
| D5PHA0 | 525368 |
| D5PJG5 | 525368 |
| D5PJG8 | 525368 |
| D5PMQ6 | 525370 |
| D5PZY0 | 525259 |
| D5Q7Q8 | 525259 |
| D5Q7R1 | 525259 |
| D5QVG7 | 595536 |
| D5R627 | 642492 |
| D5RUA6 | 525371 |
| D5S0P1 | 525258 |
| D5S0P4 | 525258 |
| D5S433 | 525258 |
| D5SCL6 | 762948 |
| D5THU6 | 573236 |
| D5TIE9 | 573236 |
| D5VS27 | 573063 |
| D5VV85 | 758678 |
| D5VVU9 | 758678 |
| D5XRM6 | 515617 |
| D5XS18 | 515617 |
| D5XXA6 | 515617 |
| D5Y1Q4 | 520141 |
| D5Y235 | 520141 |
| D5Y7P9 | 520141 |
| D5YDA3 | 520140 |
| D5YDP3 | 520140 |
| D5YI74 | 520140 |
| D5YPM8 | 515616 |
| D5YQ33 | 515616 |
| D5YUP5 | 515616 |
| D5Z1G7 | 537209 |
| D5Z1V6 | 537209 |
| D5Z6V2 | 537209 |
| D5ZDZ8 | 537210 |
| D5ZEE8 | 537210 |

|        |        |
|--------|--------|
| D5ZJV4 | 537210 |
| D5ZT56 | 566461 |
| D6AS38 | 457431 |
| D6BA11 | 457425 |
| D6BCX0 | 556264 |
| D6CVM2 | 426114 |
| D6D8S9 | 722911 |
| D6D9P5 | 722911 |
| D6DIN9 | 717608 |
| D6DTB7 | 718254 |
| D6E155 | 657318 |
| D6E7P8 | 657308 |
| D6EQ56 | 457428 |
| D6F2K9 | 611302 |
| D6F304 | 611302 |
| D6FJZ8 | 611303 |
| D6FNI0 | 611304 |
| D6FP32 | 611304 |
| D6FQ95 | 611304 |
| D6GMQ3 | 469608 |
| D6GYT5 | 585156 |
| D6H593 | 528348 |
| D6HGP6 | 585144 |
| D6I4S7 | 550672 |
| D6IHZ1 | 550676 |
| D6IJT9 | 656380 |
| D6J059 | 585157 |
| D6J6F8 | 550677 |
| D6JH6  | 528351 |
| D6JW73 | 575565 |
| D6K2U9 | 645465 |
| D6L242 | 641147 |
| D6LTV7 | 520448 |
| D6LXP0 | 585154 |
| D6SH15 | 548470 |
| D6SLT8 | 555779 |
| D6T4M8 | 553577 |
| D6UAM2 | 762962 |
| D6UJV4 | 585535 |
| D6V1M7 | 666684 |
| D6VK41 | 596153 |
| D6XP95 | 637913 |
| D6YDC8 | 707184 |
| D6YFH1 | 707185 |
| D6YI37 | 707186 |
| D6YKR2 | 707187 |
| D6YMH6 | 707183 |
| D6YY48 | 718219 |
| D6ZU23 | 759350 |
| D7ADC9 | 663917 |
| D7CAD0 | 749414 |
| D7DDI6 | 759363 |
| D7DGW1 | 759364 |
| D7EP09 | 515615 |

|        |        |
|--------|--------|
| D7EPE8 | 515615 |
| D7EVB2 | 515615 |
| D7H611 | 520453 |
| D7HEG2 | 345074 |
| D7HQ58 | 412967 |
| D7I3X9 | 693985 |
| D7IHJ1 | 469585 |
| D7IWY7 | 469592 |
| D7JHJ4 | 656379 |
| D7LKV2 | 81972  |
| D7LWI7 | 81972  |
| D7N4B4 | 641149 |
| D7NDI3 | 563008 |
| O05918 | 1773   |
| O29621 | 2234   |
| O53407 | 1773   |
| O80574 | 3702   |
| P46829 | 1765   |
| Q00UJ4 | 70448  |
| Q094T5 | 378806 |
| Q09C55 | 378806 |
| Q0EZ45 | 314345 |
| Q0G5X7 | 314231 |
| Q0RIJ9 | 326424 |
| Q0S194 | 101510 |
| Q0SDQ1 | 101510 |
| Q0YUC5 | 377431 |
| Q188N4 | 272563 |
| Q1B266 | 164756 |
| Q1B4A6 | 164756 |
| Q1B8G5 | 164756 |
| Q1D3D3 | 246197 |
| Q1K3A7 | 281689 |
| Q1N387 | 207949 |
| Q1NAI0 | 314266 |
| Q1NP14 | 262489 |
| Q1NRT9 | 262489 |
| Q1PWY2 | 174633 |
| Q1V1C4 | 314261 |
| Q1V754 | 314288 |
| Q1W0A9 | 313595 |
| Q1YF36 | 287752 |
| Q1YSX3 | 314287 |
| Q1Z376 | 314280 |
| Q1ZHJ8 | 314282 |
| Q1ZMQ6 | 314292 |
| Q26DM1 | 156586 |
| Q2BRA6 | 207954 |
| Q2C7U9 | 121723 |
| Q2CKF6 | 314256 |
| Q3L886 | 246196 |
| Q3R6G7 | 155920 |
| Q3RBB1 | 155920 |
| Q3RDT8 | 155919 |



|        |        |
|--------|--------|
| Q4ECH2 | 307502 |
| Q4HGG1 | 306254 |
| Q4HQ53 | 306264 |
| Q5NVU9 | 115547 |
| Q5YW71 | 37329  |
| Q5YWK8 | 37329  |
| Q5YWX6 | 37329  |
| Q5Z0L8 | 37329  |
| Q67W29 | 39947  |
| Q6VAY4 | 91504  |
| Q6VRJ8 | 210    |
| Q73TU9 | 1770   |
| Q73TZ2 | 1770   |
| Q73VY0 | 1770   |
| Q73XS2 | 1770   |
| Q73YE3 | 1770   |
| Q742G5 | 1770   |
| Q744J2 | 1770   |
| Q744K9 | 1770   |
| Q76D21 | 1590   |
| Q76E50 | 17     |
| Q7D8X3 | 1773   |
| Q7PAT9 | 272951 |
| Q7U0R7 | 1765   |
| Q7U105 | 1765   |
| Q8G614 | 216816 |
| Q8LB01 | 3702   |
| Q8RAI4 | 119072 |

**diaminopimelate  
decarboxylase**

| UniProt | TXID   |
|---------|--------|
| Q949X7  | 3702   |
| D7L343  | 81972  |
| Q6ZG77  | 39947  |
| B7ED21  | 39947  |
| A9SFK1  | 145481 |
| A9U0R2  | 145481 |
| A8HNC0  | 3055   |
| C3ZAT5  | 7739   |
| C1DTF1  | 204536 |
| C6HWT2  | 412449 |
| Q3A1U8  | 338963 |
| B5YL42  | 289376 |
| Q1N418  | 207949 |
| Q2IGX9  | 290397 |
| Q1AZX2  | 266117 |
| D3PAV1  | 639282 |
| D4H4C0  | 522772 |
| B2V8C1  | 436114 |
| B8JAN6  | 455488 |

**aromatic amino acid  
aminotransferase I**

| UniProt | TXID   |
|---------|--------|
| P53090  | 4932   |
| D6VTV2  | 559292 |
| C8Z853  | 643680 |
| C7GWZ3  | 574961 |
| B3LHQ0  | 285006 |
| A6ZTY7  | 307796 |
| A7TT91  | 436907 |
| Q6FTM8  | 5478   |
| C5DT73  | 559307 |
| C5DLN0  | 559295 |
| Q6CKK3  | 28985  |
| Q752M6  | 33169  |
| Q6BYU5  | 4959   |
| A3LMX7  | 4924   |
| C4XXW0  | 306902 |
| B9WA90  | 573826 |
| C4YJ02  | 5476   |
| Q5ADA2  | 5476   |
| Q5ACW9  | 5476   |

**aromatic amino acid  
aminotransferase II**

| UniProt | TXID   |
|---------|--------|
| P38840  | 4932   |
| D3DL86  | 559292 |
| B3LSQ1  | 285006 |
| C8Z9T2  | 643680 |
| A6ZT45  | 307796 |
| C7GTW4  | 574961 |
| Q6FT20  | 5478   |
| A7TKJ5  | 436907 |
| C5DZL2  | 559307 |
| Q6CR82  | 28985  |
| C5DCW2  | 559295 |
| B9WGK8  | 573826 |
| A5DQ29  | 4929   |
| A3GF91  | 4924   |
| A3GGR2  | 4924   |
| C5MDV9  | 294747 |
| C4YGT4  | 5476   |
| Q5A472  | 5476   |
| Q5A4C4  | 5476   |

|        |        |        |        |        |        |
|--------|--------|--------|--------|--------|--------|
| B4UHY2 | 447217 | A5DV12 | 36914  | C4Y8G5 | 306902 |
| Q2BRG1 | 207954 | C5M5E9 | 294747 | A5E7Q6 | 36914  |
| B6AKF9 | 419541 | A5DFM7 | 4929   | C4R6Z7 | 644223 |
| A1TXX6 | 351348 | C4QYZ3 | 644223 | Q6CCZ6 | 4952   |
| D3MWE9 | 547146 | Q6C551 | 4952   | Q9HIY3 | 2303   |
| D2LC45 | 648757 | Q5AZE2 | 162425 | C1B176 | 632772 |
| C4FKX0 | 432331 | Q5B339 | 162425 | C1AWU9 | 632772 |
| A3EQW3 | 419542 | C8V102 | 227321 | D1C6M2 | 479434 |
| D5MIL1 | 671143 | C8V843 | 227321 | D1C6Z3 | 479434 |
| A7H772 | 404589 | Q2UFD9 | 5062   | D1CA43 | 479434 |
| D0LZL7 | 502025 | Q2U485 | 5062   | C6BS59 | 526222 |
| B4U7U8 | 380749 | A2QD20 | 425011 | C6C265 | 526222 |
| Q0HQJ1 | 60481  | A2R526 | 425011 | C3JGE5 | 596309 |
| Q1YSU7 | 314287 | B8NHI9 | 332952 | C3JRF8 | 596309 |
| Q0HN96 | 60480  | B8NTN9 | 332952 | C0ZWQ5 | 234621 |
| Q0VM22 | 393595 | C1H4Q3 | 502779 | C0ZTG6 | 234621 |
| A0KS64 | 94122  | C0SF57 | 482561 | Q125E7 | 296591 |
| B9M379 | 316067 | C1GK60 | 502780 | Q129Y0 | 296591 |
| A3Q9P6 | 323850 | A1C7J1 | 5057   | Q124B0 | 296591 |
| D1U3P2 | 643562 | Q4X0F7 | 5085   | Q129G7 | 296591 |
| B4WYX0 | 236097 | B0XTG0 | 451804 | Q12A65 | 296591 |
| C0QR61 | 123214 | A1DHS0 | 331117 | B5VK71 | 545124 |
| A5GD88 | 351605 | B2WC58 | 426418 |        |        |
| A6F217 | 443152 | B2WP52 | 426418 |        |        |
| D3A0Z3 | 546266 | C5JQK8 | 559298 |        |        |
| A8GZG8 | 398579 | C5GBH3 | 559297 |        |        |
| B5EGX5 | 404380 | B6Q744 | 441960 |        |        |
| B0TJ50 | 458817 | C0NBP4 | 447093 |        |        |
| C6MVY5 | 443143 | B6GY09 | 500485 |        |        |
| D6KZ89 | 641147 | Q0CY85 | 341663 |        |        |
| D4X558 | 742159 | A6R4Q9 | 339724 |        |        |
| A8UQK3 | 392423 | A6S3P7 | 332648 |        |        |
| C8SU06 | 536019 | B8MRR4 | 441959 |        |        |
| C3MHU3 | 394    | B8MRR5 | 441959 |        |        |
| C6M1E7 | 547045 | B8MI34 | 441959 |        |        |
| Q98G34 | 381    | A7EXH0 | 665079 |        |        |
| B7V5G8 | 557722 | C5P1D9 | 222929 |        |        |
| A3LIJ6 | 350703 | C7YK49 | 660122 |        |        |
| Q02E85 | 208963 | C7ZH25 | 660122 |        |        |
| A3L1Y7 | 350704 | C7ZNJ6 | 660122 |        |        |
| A3RW12 | 342110 | C7ZF95 | 660122 |        |        |
| A6UCI8 | 366394 | A4R0K4 | 148305 |        |        |
| P19572 | 287    | C9SIQ8 | 526221 |        |        |
| B8LIU0 | 39645  | Q0UVF5 | 13684  |        |        |
| B8CHW3 | 225849 | B6K3W8 | 402676 |        |        |
| A1SAP6 | 326297 | D5GJ27 | 39416  |        |        |

|        |        |         |        |
|--------|--------|---------|--------|
| A9CFF5 | 176299 | C5FSY7  | 554155 |
| D7N292 | 641149 | D4CYX5  | 663202 |
| A3JE41 | 270374 | D4AYN7  | 663331 |
| C5CQG1 | 543728 | C4JL9   | 336963 |
| A6QBZ0 | 387093 | Q7S0F9  | 5141   |
| D3A1S9 | 546268 | O14192  | 4896   |
| A9M0Q2 | 374833 | Q9Y7S6  | 4896   |
| A6WXL4 | 439375 | O94570  | 4896   |
| Q2L205 | 360910 | C6H9Z4  | 544712 |
| Q2LTA2 | 56780  | Q2H DU3 | 38033  |
| B8DJ18 | 883    | Q5KEQ7  | 5207   |
| Q92MG9 | 382    | Q55XW3  | 5207   |
| Q8XV52 | 305    | Q5KM31  | 5207   |
| B5RWS9 | 305    | B2AY10  | 5145   |
| Q74GT7 | 35554  | D1ZQT4  | 5147   |
| D7ADC7 | 663917 | Q5M8X7  | 8364   |
| D0WD05 | 546265 | Q28I58  | 8364   |
| C5TLQ1 | 596320 | D3B4I4  | 670386 |
| B5SJG8 | 564066 | B0CY75  | 486041 |
| Q5F538 | 242231 | Q6PB16  | 8355   |
| D6JIV7 | 528351 | Q6IR98  | 8355   |
| D6H9R0 | 528348 | Q54K00  | 44689  |
| D1ECU0 | 528360 | Q86AG8  | 44689  |
| D1E681 | 528359 | Q5E9N4  | 9913   |
| D1E011 | 528358 | Q8N5Z0  | 9606   |
| D1DT35 | 528355 | Q4W5N8  | 9606   |
| D1DLQ3 | 528356 | Q9WVM8  | 10090  |
| D1DAB0 | 528352 | Q3UNS8  | 10090  |
| D1D6C7 | 528346 | B7STY2  | 80604  |
| B2UEH9 | 402626 | Q64602  | 10116  |
| C6S4U0 | 662598 | A8NRI2  | 240176 |
| D2L1N1 | 644968 | D6RP20  | 240176 |
| Q21P77 | 203122 | D6RPR8  | 240176 |
| C0EPQ3 | 546264 | Q2KEC9  | 242507 |
| C9X2J8 | 604162 | Q4PDK9  | 5270   |
| C6SDQ9 | 663926 | Q4P8M5  | 5270   |
| A3YDJ6 | 314277 | D6WQD2  | 7070   |
| C4WJB4 | 641118 | C1BQK8  | 217165 |
| B5JSZ4 | 391615 | B8P756  | 561896 |
| Q1NP10 | 262489 | Q8U4G7  | 2261   |
| C6SNL9 | 295996 | A2BJX0  | 415426 |
| B4S2E0 | 314275 | O57946  | 53953  |
| A1KW56 | 272831 | Q9V282  | 29292  |
| Q6G1Q7 | 38323  | D3L4X1  | 592015 |
| A1UQZ1 | 360095 | D3L5H5  | 592015 |
| B9JTJ4 | 311402 | B6YXH1  | 523850 |

|        |        |        |        |
|--------|--------|--------|--------|
| A1TKV2 | 397945 | B6YWH1 | 523850 |
| D1DGM1 | 528354 | A9WLC6 | 288705 |
| C1HV26 | 528345 | C6A1W9 | 604354 |
| B4RRA6 | 521006 | C6A3Y8 | 604354 |
| A6W1B1 | 400668 | A0K277 | 290399 |
| C7LTT9 | 525897 | A0JVT5 | 290399 |
| Q1QSV2 | 290398 | D2Z555 | 469381 |
| Q30ZX1 | 207559 | D2Z554 | 469381 |
| Q11DW3 | 266779 | D2Z551 | 469381 |
| D4DVJ8 | 546263 | A7VP07 | 428125 |
| A0NX43 | 384765 | D1B8E9 | 525903 |
| A4VGW6 | 379731 | D1B975 | 525903 |
| D5V5Q5 | 572480 | D1B793 | 525903 |
| B9QWS7 | 244592 | B8H7W2 | 452863 |
| C9Y829 | 667019 | C8XE84 | 479431 |
| D0W418 | 546262 | C8XDZ4 | 479431 |
| Q88CF4 | 160488 | B5ISJ9 | 391623 |
| A5WAU4 | 351746 | B5IT16 | 391623 |
| Q2YBM2 | 323848 | Q5JFM8 | 311400 |
| Q12S91 | 318161 | B2KBF6 | 445932 |
| Q2K3P1 | 347834 | D1Y263 | 352165 |
| B9JBQ7 | 311403 | D1Y271 | 352165 |
| Q3SUR2 | 323098 | D1Y6G1 | 352165 |
| A7BZP9 | 422289 | C0CQY1 | 476272 |
| C0N8U8 | 637616 | C0CJZ7 | 476272 |
| A9CX82 | 314608 | C0CQB6 | 476272 |
| Q1ZDC7 | 314282 | C0CQU0 | 476272 |
| C6BFD8 | 428406 | C0CJ86 | 476272 |
| B8KD34 | 391586 | A8AAT9 | 453591 |
| D3SCB8 | 396595 | A1RTC0 | 384616 |
| B3PPC3 | 491916 | C7INH2 | 588581 |
| A9D7X2 | 411684 | C7INH3 | 588581 |
| A0Y9E3 | 247633 | C7ICQ2 | 588581 |
| A0LEA9 | 335543 | C4KJ65 | 426118 |
| Q4K3W3 | 220664 | C4KJT5 | 426118 |
| A6F900 | 58051  | C3MYX7 | 427317 |
| A6FHR9 | 58051  | C3MRR9 | 427317 |
| Q1ZLA4 | 314292 | C3N025 | 427318 |
| Q47JL5 | 159087 | C3N0Q8 | 427318 |
| D3BWB5 | 653733 | D3LTA0 | 699218 |
| B5ZRV7 | 395492 | D3LVS5 | 699218 |
| Q0G118 | 314231 | A0LWW4 | 351607 |
| Q2C2Q3 | 121723 | A3MWQ9 | 410359 |
| Q1MB71 | 216596 | D2PE97 | 425944 |
| C6MEQ0 | 153948 | D2PEY3 | 425944 |
| D7I6G7 | 693985 | C3N8A8 | 439386 |

|        |        |        |        |
|--------|--------|--------|--------|
| Q13CL3 | 316057 | C3N8Z4 | 439386 |
| Q8DD82 | 672    | D5U1G5 | 633148 |
| C6AXH9 | 395491 | D5U0R0 | 633148 |
| Q7MQC2 | 196600 | Q9C4M4 | 2265   |
| Q6FYE6 | 803    | Q4J8Q1 | 2285   |
| A4XNX5 | 399739 | Q4JA09 | 2285   |
| A4B9F0 | 314283 | A8MBP7 | 397948 |
| C9VC92 | 520456 | A8MD57 | 397948 |
| D5X6D1 | 75379  | B7R0U3 | 246969 |
| B0CIY6 | 470137 | C3NMS8 | 419942 |
| A4A9F3 | 314285 | C3NMH5 | 419942 |
| A0AK64 | 386043 | C5A5P6 | 593117 |
| A0B1U1 | 331272 | C3MJ85 | 429572 |
| A0B761 | 349307 | C3MJW8 | 429572 |
| A0DDH5 | 5888   | A6VI85 | 426368 |
| A0KC32 | 331272 | Q6M122 | 39152  |
| A0KFI0 | 380703 | A6TJA6 | 293826 |
| A0L1I2 | 94122  | A6TSX6 | 293826 |
| A0LE32 | 156889 | Q9V2W5 | 49899  |
| A0LSJ2 | 351607 | C0WAF8 | 563191 |
| A0LZD1 | 411154 | C5EEF6 | 457421 |
| A0PUL7 | 362242 | C5EEF5 | 457421 |
| A0PYI3 | 386415 | B9DYW0 | 583346 |
| A0Q0N7 | 386415 | B9E558 | 583346 |
| A0Q830 | 401614 | B9E5R4 | 583346 |
| A0Q8L3 | 401614 | B9E3D4 | 583346 |
| A0QBX1 | 243243 | A5N5B2 | 431943 |
| A0QCV9 | 243243 | A5N1C7 | 431943 |
| A0R5H9 | 246196 | A5N212 | 431943 |
| A0RBN1 | 412694 | A5MZE0 | 431943 |
| A0RMP2 | 360106 | D2Q549 | 479435 |
| A1A3B5 | 367928 | D2PT02 | 479435 |
| A1AF49 | 405955 | D2PSN8 | 479435 |
| A1AQI3 | 338966 | C6VLC9 | 644042 |
| A1AVE2 | 413404 | C6VPE9 | 644042 |
| A1B1K1 | 318586 | D7K5E5 | 457390 |
| A1B3L8 | 318586 | A7LYW3 | 411476 |
| A1BH64 | 290317 | A7LYW4 | 411476 |
| A1JPF4 | 393305 | D1YCT0 | 679194 |
| A1KAK8 | 62928  | P95957 | 2287   |
| A1KBR4 | 62928  | Q97TY7 | 2287   |
| A1KI81 | 410289 | D7J839 | 585544 |
| A1R7X1 | 290340 | D7J840 | 585544 |
| A1RP45 | 351745 | D0KRF4 | 555311 |
| A1RPD3 | 351745 | D0KR52 | 555311 |
| A1SHH1 | 196162 | Q88T05 | 1590   |

|        |        |        |        |
|--------|--------|--------|--------|
| A1SR00 | 357804 | Q88X39 | 1590   |
| A1TD76 | 350058 | C2FLB9 | 525338 |
| A1TTR2 | 397945 | C2FJI6 | 525338 |
| A1UK05 | 189918 | D4WXH3 | 702444 |
| A1UZS7 | 320388 | D4WXH2 | 702444 |
| A1V8C7 | 320388 | D4VSS7 | 702447 |
| A1VB88 | 391774 | D4VSS8 | 702447 |
| A1VDE1 | 391774 | D0TQ15 | 469588 |
| A1VK10 | 365044 | D0TQ16 | 469588 |
| A1VY33 | 354242 | C3QK73 | 556258 |
| A1W3Y5 | 232721 | C3QK74 | 556258 |
| A1WS52 | 391735 | D5DH59 | 592022 |
| A1WWB2 | 349124 | D5DI05 | 592022 |
| A1WXB7 | 349124 | D5DZF6 | 545693 |
| A2BRR9 | 146891 | D5DW32 | 545693 |
| A2BX77 | 167542 | D6D823 | 657309 |
| A2C3I7 | 167555 | D6D824 | 657309 |
| A2C8D2 | 59922  | C3R2N5 | 469590 |
| A2FSX2 | 5722   | C3R2N6 | 469590 |
| A2RKG8 | 416870 | D4WDF0 | 702443 |
| A2S1Y0 | 412022 | D4WDF1 | 702443 |
| A2S673 | 412022 | D1BRV3 | 446471 |
| A2S7F3 | 412022 |        |        |
| A2SKI0 | 420662 |        |        |
| A2SR51 | 410358 |        |        |
| A3CPR4 | 388919 |        |        |
| A3CWU2 | 368407 |        |        |
| A3D9B2 | 325240 |        |        |
| A3DD89 | 203119 |        |        |
| A3M805 | 400667 |        |        |
| A3MAA9 | 400667 |        |        |
| A3MCQ5 | 320389 |        |        |
| A3MQ72 | 320389 |        |        |
| A3MRT1 | 320389 |        |        |
| A3N2H3 | 416269 |        |        |
| A3N5F6 | 320373 |        |        |
| A3NEE1 | 320373 |        |        |
| A3NGR2 | 320373 |        |        |
| A3NR54 | 357348 |        |        |
| A3P075 | 357348 |        |        |
| A3P2B4 | 357348 |        |        |
| A3PDJ5 | 167546 |        |        |
| A3PMC0 | 349101 |        |        |
| A3Q3D2 | 164757 |        |        |
| A3UA07 | 216432 |        |        |
| A3UBR4 | 216432 |        |        |

|        |        |
|--------|--------|
| A4CMN0 | 313596 |
| A4FBI8 | 405948 |
| A4FN46 | 405948 |
| A4FWX7 | 402880 |
| A4G9Q1 | 204773 |
| A4IQH6 | 420246 |
| A4IVY8 | 418136 |
| A4IXJ3 | 418136 |
| A4J3L1 | 349161 |
| A4J9J6 | 349161 |
| A4JPW2 | 269482 |
| A4JQY9 | 269482 |
| A4QDE2 | 340322 |
| A4QFJ9 | 340322 |
| A4S9T6 | 436017 |
| A4SE11 | 290318 |
| A4SRW8 | 382245 |
| A4SUZ4 | 312153 |
| A4T8M5 | 350054 |
| A4TLD6 | 386656 |
| A4VX35 | 391295 |
| A4W3D9 | 391296 |
| A4WE18 | 399742 |
| A4WVC2 | 349102 |
| A4X2Q8 | 369723 |
| A4XAY4 | 369723 |
| A4XI14 | 351627 |
| A4Y2U0 | 319224 |
| A4YBF8 | 319224 |
| A4Z1S2 | 114615 |
| A5CQ43 | 443906 |
| A5CXU3 | 412965 |
| A5D2V3 | 370438 |
| A5E9Q7 | 288000 |
| A5EB52 | 288000 |
| A5FHY9 | 376686 |
| A5FRS3 | 216389 |
| A5FWI2 | 349163 |
| A5GLZ4 | 32051  |
| A5GS34 | 316278 |
| A5I760 | 441771 |
| A5IM66 | 390874 |
| A5INZ4 | 359786 |
| A5IST2 | 359786 |
| A5N5T1 | 431943 |
| A5U1Z2 | 419947 |

|        |        |
|--------|--------|
| A5UDZ8 | 374930 |
| A5UHM9 | 374931 |
| A5UMZ8 | 420247 |
| A5UQD4 | 357808 |
| A5V6E2 | 392499 |
| A5VA98 | 392499 |
| A5VDK8 | 392499 |
| A5VJ55 | 557436 |
| A5VSV3 | 444178 |
| A5W6M7 | 351746 |
| A5WCB2 | 349106 |
| A5WLX4 | 336982 |
| A6L6Z6 | 435590 |
| A6L7I0 | 435590 |
| A6LDJ1 | 435591 |
| A6LIK7 | 435591 |
| A6LLV3 | 391009 |
| A6M2R4 | 290402 |
| A6Q1Z2 | 387092 |
| A6Q2A3 | 387092 |
| A6QDA7 | 426430 |
| A6QGV1 | 426430 |
| A6T3G4 | 375286 |
| A6TDH9 | 272620 |
| A6TW43 | 293826 |
| A6TXQ8 | 359787 |
| A6U1M1 | 359787 |
| A6UP95 | 406327 |
| A6UPK0 | 406327 |
| A6UTH7 | 419665 |
| A6V5X0 | 381754 |
| A6VE51 | 381754 |
| A6VGE0 | 426368 |
| A6VKS1 | 339671 |
| A6VWU5 | 400668 |
| A6W7F0 | 266940 |
| A6WTF6 | 402882 |
| A7FFC8 | 349747 |
| A7FYT2 | 441770 |
| A7GIS2 | 441772 |
| A7GMV8 | 315749 |
| A7H086 | 360105 |
| A7H561 | 360109 |
| A7HK57 | 381764 |
| A7HTI6 | 402881 |
| A7I2W1 | 360107 |



|        |        |
|--------|--------|
| A7IA50 | 456442 |
| A7IG42 | 78245  |
| A7JXK4 | 150340 |
| A7K5A1 | 150340 |
| A7MR54 | 290339 |
| A7N0W1 | 338187 |
| A7N9W3 | 458234 |
| A7NEL4 | 458234 |
| A7NI38 | 383372 |
| A7WX79 | 418127 |
| A7X278 | 418127 |
| A7Z683 | 326423 |
| A7ZCF1 | 360104 |
| A7ZQU4 | 331111 |
| A8A3X2 | 331112 |
| A8AP60 | 290338 |
| A8EWM7 | 367737 |
| A8F6N9 | 416591 |
| A8FES1 | 315750 |
| A8FKA3 | 407148 |
| A8G0W1 | 425104 |
| A8G5G0 | 93060  |
| A8GIJ2 | 399741 |
| A8I031 | 438753 |
| A8KYH2 | 298653 |
| A8KYM6 | 298653 |
| A8LL43 | 398580 |
| A8M094 | 391037 |
| A8M2L5 | 391037 |
| A8M854 | 391037 |
| A8MC62 | 397948 |
| A8YUT0 | 405566 |
| A8YZ48 | 451516 |
| A8Z3X8 | 451516 |
| A8Z5Z1 | 444179 |
| A8ZUA7 | 96561  |
| A9A0C7 | 96561  |
| A9AAB3 | 444158 |
| A9B4A8 | 316274 |
| A9BB15 | 93059  |
| A9BFP3 | 403833 |
| A9BUZ8 | 398578 |
| A9G338 | 448385 |
| A9GY99 | 448385 |
| A9HRI0 | 272568 |
| A9IHQ0 | 340100 |

|        |        |
|--------|--------|
| A9IZG4 | 382640 |
| A9KSP5 | 357809 |
| A9M970 | 483179 |
| A9N3I2 | 272994 |
| A9N485 | 272994 |
| A9NGC5 | 441768 |
| A9R2S4 | 349746 |
| A9VLI7 | 315730 |
| A9W3N0 | 419610 |
| A9W7P2 | 419610 |
| A9WER2 | 324602 |
| A9WMT0 | 288705 |
| A9WNA8 | 288705 |
| B0BRB8 | 434271 |
| B0CAX9 | 329726 |
| B0JI64 | 449447 |
| B0K665 | 399726 |
| B0K776 | 340099 |
| B0KG72 | 76869  |
| B0KQ40 | 76869  |
| B0RAP9 | 31964  |
| B0RPV3 | 509169 |
| B0SGT1 | 355278 |
| B0SPX6 | 456481 |
| B0T2T9 | 366602 |
| B0TFB9 | 498761 |
| B0TWJ6 | 484022 |
| B0TX75 | 484022 |
| B0UCU0 | 426117 |
| B0UWI0 | 228400 |
| B0VDN3 | 509173 |
| B0VT29 | 509170 |
| B1GYN3 | 471821 |
| B1HRM7 | 444177 |
| B1I3Y4 | 477974 |
| B1I8T0 | 487214 |
| B1IFH3 | 498213 |
| B1IU06 | 481805 |
| B1J1W1 | 390235 |
| B1JQB8 | 502800 |
| B1K7Y1 | 406425 |
| B1K8I0 | 406425 |
| B1KBM2 | 406425 |
| B1KQC9 | 392500 |
| B1L2I6 | 498214 |
| B1L5D9 | 374847 |

|        |        |
|--------|--------|
| B1LBQ7 | 126740 |
| B1LR36 | 439855 |
| B1M0A5 | 426355 |
| B1MKF2 | 561007 |
| B1MLU3 | 561007 |
| B1MZN1 | 349519 |
| B1VFW4 | 504474 |
| B1VSP8 | 455632 |
| B1W0C3 | 455632 |
| B1W3K3 | 455632 |
| B1WWH7 | 43989  |
| B1XDP4 | 316385 |
| B1XLF3 | 32049  |
| B1XST4 | 452638 |
| B1Y312 | 395495 |
| B1YJ44 | 262543 |
| B1YYI9 | 398577 |
| B1Z7G6 | 441620 |
| B1ZHE8 | 441620 |
| B1ZTL0 | 452637 |
| B2A6F2 | 457570 |
| B2G6M6 | 557433 |
| B2GC08 | 334390 |
| B2GLW9 | 378753 |
| B2HR80 | 216594 |
| B2HX83 | 405416 |
| B2IB09 | 395963 |
| B2IM60 | 516950 |
| B2ITZ1 | 63737  |
| B2J2S8 | 63737  |
| B2JI28 | 391038 |
| B2JZ78 | 502801 |
| B2K220 | 502801 |
| B2KCK2 | 445932 |
| B2RGX4 | 431947 |
| B2S8P0 | 430066 |
| B2SEU5 | 441952 |
| B2SJ64 | 360094 |
| B2T014 | 398527 |
| B2T713 | 398527 |
| B2TA75 | 398527 |
| B2TQL5 | 508765 |
| B2TYQ3 | 344609 |
| B2UQ22 | 349741 |
| B2USC1 | 512562 |
| B2UZA5 | 508767 |

|        |        |
|--------|--------|
| B2VFT7 | 338565 |
| B3DPJ2 | 205913 |
| B3DUY0 | 481448 |
| B3E926 | 398767 |
| B3EDH7 | 290315 |
| B3EPY7 | 331678 |
| B3GYK6 | 537457 |
| B3PEI9 | 498211 |
| B3QCB0 | 395960 |
| B3QMQ0 | 517417 |
| B3QT24 | 517418 |
| B3QUA3 | 517418 |
| B3R7C8 | 164546 |
| B3W7E8 | 543734 |
| B4EFE4 | 216591 |
| B4EUH0 | 529507 |
| B4EUS9 | 529507 |
| B4FT32 | 4577   |
| B4RFG7 | 450851 |
| B4S8Y2 | 290512 |
| B4SAJ9 | 324925 |
| B4SZN2 | 423368 |
| B4T507 | 423368 |
| B4TBM9 | 454169 |
| B4TGR9 | 454169 |
| B4TQ96 | 439843 |
| B4TUN3 | 439843 |
| B5BCI6 | 554290 |
| B5BFH9 | 554290 |
| B5E2G9 | 512566 |
| B5EIG1 | 404380 |
| B5ERL5 | 380394 |
| B5EZP4 | 454166 |
| B5F4V8 | 454166 |
| B5FCR1 | 388396 |
| B5FPK4 | 439851 |
| B5FUC3 | 439851 |
| B5QWU5 | 550537 |
| B5R341 | 550537 |
| B5RCI5 | 550538 |
| B5RDY9 | 550538 |
| B5XUN5 | 507522 |
| B5YEX1 | 309799 |
| B5Z4F6 | 444450 |
| B5ZA56 | 563041 |
| B5ZM03 | 272568 |

|        |        |
|--------|--------|
| B6EP84 | 316275 |
| B6I6W3 | 409438 |
| B6ISK3 | 414684 |
| B6IYR6 | 414684 |
| B6JDJ0 | 504832 |
| B6JKL9 | 570508 |
| B6YR99 | 511995 |
| B7G3A2 | 556484 |
| B7GKH5 | 491915 |
| B7GNL9 | 391904 |
| B7GY70 | 557600 |
| B7HHH4 | 405532 |
| B7HKE3 | 405534 |
| B7I5Y6 | 480119 |
| B7ICP3 | 484019 |
| B7INB2 | 405531 |
| B7JBF7 | 243159 |
| B7JG04 | 405535 |
| B7K1S5 | 41431  |
| B7KH89 | 65393  |
| B7KX28 | 440085 |
| B7KX96 | 440085 |
| B7LF15 | 585055 |
| B7LP52 | 585054 |
| B7LY94 | 585034 |
| B7MM44 | 585035 |
| B7MZD8 | 585397 |
| B7N770 | 585056 |
| B7NVY4 | 585057 |
| B7UHQ6 | 574521 |
| B7VMD5 | 575788 |
| B7VSB3 | 575788 |
| B8BT13 | 296543 |
| B8CGU1 | 225849 |
| B8CW02 | 373903 |
| B8D7W8 | 561501 |
| B8D9L6 | 563178 |
| B8DBX4 | 552536 |
| B8DPQ8 | 883    |
| B8DWQ9 | 442563 |
| B8E0J4 | 515635 |
| B8E691 | 407976 |
| B8EML9 | 395965 |
| B8F6T0 | 557723 |
| B8FA18 | 439235 |
| B8FH33 | 439235 |

|        |        |
|--------|--------|
| B8FLY1 | 439235 |
| B8G0D4 | 272564 |
| B8G8Y4 | 326427 |
| B8GI83 | 521011 |
| B8GT85 | 396588 |
| B8GY54 | 565050 |
| B8HB08 | 452863 |
| B8HLE2 | 395961 |
| B8I674 | 394503 |
| B8I697 | 394503 |
| B8IHN5 | 460265 |
| B8IQX0 | 460265 |
| B8J168 | 525146 |
| B8ZNY2 | 561276 |
| B8ZR25 | 561304 |
| B9DP04 | 396513 |
| B9DTR7 | 218495 |
| B9DZB2 | 583346 |
| B9EC01 | 458233 |
| B9H0T6 | 3694   |
| B9HRK5 | 3694   |
| B9IV09 | 361100 |
| B9JI17 | 311403 |
| B9K1Q3 | 311402 |
| B9K869 | 309803 |
| B9KDN9 | 306263 |
| B9KLS3 | 557760 |
| B9L103 | 309801 |
| B9L907 | 598659 |
| B9LA44 | 598659 |
| B9LJM6 | 480224 |
| B9LUB5 | 416348 |
| B9M393 | 316067 |
| B9MDE3 | 535289 |
| B9MQB3 | 521460 |
| B9RH82 | 3988   |
| C0PXX1 | 476213 |
| C0Q004 | 476213 |
| C0QAL6 | 177437 |
| C0QL78 | 177437 |
| C0QL89 | 177437 |
| C0QPS5 | 123214 |
| C0QZY6 | 565034 |
| C0RFM6 | 546272 |
| C0ZC72 | 358681 |
| C0ZHU8 | 358681 |

|        |        |
|--------|--------|
| C1A1T4 | 234621 |
| C1A1Z6 | 234621 |
| C1A3W9 | 379066 |
| C1AMT7 | 561275 |
| C1AW16 | 632772 |
| C1CA22 | 488221 |
| C1CGQ8 | 488222 |
| C1CMS4 | 488223 |
| C1CTN2 | 487213 |
| C1CVI7 | 546414 |
| C1CZG9 | 546414 |
| C1D9B8 | 557598 |
| C1DJ55 | 322710 |
| C1DMY9 | 322710 |
| C1EMR6 | 572264 |
| C1F969 | 240015 |
| C1FM02 | 536232 |
| C3K435 | 216595 |
| C3KUV0 | 515621 |
| C3L9N8 | 568206 |
| C3LPW7 | 579112 |
| C3NUA5 | 593588 |
| C3P514 | 592021 |
| C3PFN9 | 548476 |
| C3PKL9 | 548476 |
| C4K7C4 | 572265 |
| C4KPG7 | 536230 |
| C4KWT6 | 536230 |
| C4L2D7 | 360911 |
| C4LDU9 | 595494 |
| C4LJN1 | 645127 |
| C4WYS1 | 484021 |
| C4XS91 | 573370 |
| C4XS98 | 573370 |
| C4Z038 | 515620 |
| C4Z1W2 | 515620 |
| C4Z8Y0 | 515619 |
| C4ZGX3 | 515619 |
| C4ZZZ1 | 595496 |
| C5A6G0 | 593117 |
| C5A9J5 | 626418 |
| C5AZ53 | 272630 |
| C5B0Z8 | 272630 |
| C5B900 | 634503 |
| C5BUL5 | 377629 |
| C5C1S2 | 471853 |

|        |        |
|--------|--------|
| C5CA61 | 465515 |
| C5CGJ8 | 521045 |
| C5D3N5 | 471223 |
| C5VZH0 | 218494 |
| C5YS29 | 4558   |
| C6A9G7 | 580050 |
| C6AAX5 | 634504 |
| C6AFK9 | 555970 |
| C6AK40 | 634176 |
| C6BUL1 | 526222 |
| C6C6L3 | 579405 |
| C6CA89 | 579405 |
| C6CCR1 | 579405 |
| C6CG08 | 561229 |
| C6CKW3 | 561229 |
| C6CMX9 | 561229 |
| C6CU63 | 324057 |
| C6DE66 | 561230 |
| C6DGF6 | 561230 |
| C6DU77 | 478434 |
| C6E4B6 | 443144 |
| C6E9R0 | 443144 |
| C6GPR0 | 568813 |
| C6GW44 | 568814 |
| C6SNY5 | 511691 |
| C6UCW4 | 413997 |
| C6USF2 | 544404 |
| C6VQ64 | 644042 |
| C6W5G4 | 471854 |
| C6W8P3 | 446462 |
| C6WHL5 | 446462 |
| C6WTN8 | 583345 |
| C6WZM6 | 531844 |
| C6XB67 | 582744 |
| C6XHV1 | 537021 |
| C6XLN3 | 582402 |
| C6XYQ4 | 485917 |
| C7BI15 | 553480 |
| C7BKN6 | 553480 |
| C7BYN0 | 592205 |
| C7C8B6 | 661410 |
| C7CDU6 | 661410 |
| C7JFI9 | 634452 |
| C7LEL2 | 568815 |
| C7LK87 | 595499 |
| C7M180 | 525909 |



|        |        |
|--------|--------|
| C7M3Q4 | 521097 |
| C7MDU4 | 446465 |
| C7MLU2 | 469378 |
| C7MX58 | 471857 |
| C7N472 | 471855 |
| C7N753 | 471855 |
| C7NAR6 | 523794 |
| C7NIU6 | 478801 |
| C7NQC6 | 519442 |
| C7P2F6 | 485914 |
| C7P7Q9 | 573064 |
| C7PA05 | 485918 |
| C7PRL3 | 485918 |
| C7Q1P8 | 479433 |
| C7Q1Q2 | 479433 |
| C7Q567 | 479433 |
| C7Q626 | 479433 |
| C7QQZ6 | 395962 |
| C7QZD7 | 471856 |
| C7R3M4 | 471856 |
| C7R6Q1 | 523791 |
| C7RKU0 | 522306 |
| C7RTW3 | 522306 |
| C7T8R4 | 568703 |
| C7TFF9 | 568704 |
| C8TG88 | 573235 |
| C8UAI7 | 585395 |
| C8UF47 | 585396 |
| C8VZ05 | 485916 |
| C8WA07 | 521095 |
| C8WE60 | 622759 |
| C8WJL6 | 479437 |
| C8WK38 | 479437 |
| C8WTN4 | 521098 |
| C8X2H8 | 485915 |
| C8XGU3 | 479431 |
| C8XIA2 | 479431 |
| C9R2T9 | 668336 |
| C9R7Y2 | 429009 |
| C9RI02 | 579137 |
| C9RRE8 | 59374  |
| C9RZX8 | 544556 |
| C9XJR8 | 645462 |
| C9XSS6 | 645462 |
| C9XZL8 | 413502 |
| C9YM99 | 645463 |

|        |        |
|--------|--------|
| C9YN01 | 645463 |
| C9YUF6 | 680198 |
| C9YZE3 | 680198 |
| C9Z012 | 680198 |
| C9Z332 | 680198 |
| C9Z8G9 | 680198 |
| D0FVK6 | 79967  |
| D0J5X7 | 688245 |
| D0J9B3 | 600809 |
| D0JB04 | 331104 |
| D0K4X5 | 681288 |
| D0K7A6 | 681288 |
| D0KLN2 | 561231 |
| D0KW89 | 555778 |
| D0L1T4 | 555778 |
| D0L9G7 | 526226 |
| D0R4B7 | 633699 |
| D0Z8R0 | 498217 |
| D0ZDW5 | 498217 |
| D0ZF68 | 498217 |
| D1A870 | 471852 |
| D1AE43 | 471852 |
| D1ANNO | 526218 |
| D1B0D3 | 525898 |
| D1BCT2 | 446469 |
| D1BMV6 | 479436 |
| D1BWD6 | 446471 |
| D1C1P8 | 479434 |
| D1C814 | 479434 |
| D1CFP5 | 525904 |
| D1YWV9 | 304371 |
| D2ARU9 | 479432 |
| D2ATF5 | 479432 |
| D2B0K1 | 479432 |
| D2BFH3 | 479432 |
| D2BH29 | 311424 |
| D2BR53 | 684738 |
| D2BVW0 | 590409 |
| D2C146 | 590409 |
| D2C348 | 590409 |
| D2C3S3 | 590168 |
| D2NU16 | 680646 |
| D2NVD5 | 653938 |
| D2P6R0 | 637381 |
| D2Q3G0 | 479435 |
| D2Q6E3 | 401473 |

|        |        |
|--------|--------|
| D2QCI1 | 504472 |
| D2R0H9 | 530564 |
| D2RI67 | 572546 |
| D2RLN7 | 591001 |
| D2RX75 | 543526 |
| D2SET1 | 526225 |
| D2TJI4 | 637910 |
| D2UCF6 | 380358 |
| D3DFE6 | 608538 |
| D3DYT4 | 634498 |
| D3E7E4 | 481743 |
| D3ENK8 | 713887 |
| D3F242 | 469383 |
| D3FZU0 | 398511 |
| D3H6T3 | 365659 |
| D3HFI6 | 637909 |
| D3P5L0 | 137722 |
| D3PPF4 | 504728 |
| D3PWV4 | 446470 |
| D3PXR2 | 446470 |
| D3QCY1 | 698737 |
| D3QQG9 | 701177 |
| D3RHR6 | 640131 |
| D3RU77 | 572477 |
| D3RV77 | 572477 |
| D3RWW3 | 589924 |
| D3S4Y4 | 644281 |
| D3SEW3 | 396595 |
| D3SI33 | 633145 |
| D3SL32 | 638303 |
| D3SZN6 | 547559 |
| D3T0U5 | 547559 |
| D3T474 | 580331 |
| D3UJ93 | 679897 |
| D3UPQ7 | 683837 |
| D3V470 | 406818 |
| D3VK37 | 406817 |
| D4GLN6 | 706191 |
| D4GW22 | 309800 |
| D4H5F8 | 522772 |
| D4HE67 | 553199 |
| D4HWD8 | 665029 |
| D4IA97 | 716540 |
| D4Z152 | 452662 |
| D4Z519 | 452662 |
| D4ZCR4 | 637905 |

|        |        |
|--------|--------|
| D5AR90 | 272942 |
| D5B338 | 637386 |
| D5BBR6 | 655815 |
| D5BLL2 | 655815 |
| D5BMR6 | 488538 |
| D5C3F0 | 472759 |
| D5C540 | 472759 |
| D5C994 | 716541 |
| D5CMA2 | 580332 |
| D5D8P6 | 641892 |
| D5DFM9 | 592022 |
| D5DL71 | 592022 |
| D5DRL4 | 545693 |
| D5DS07 | 545693 |
| D5EB64 | 547558 |
| D5ECU2 | 572547 |
| D5EK78 | 583355 |
| D5EXM0 | 264731 |
| D5H2T6 | 748671 |
| D5SXX8 | 521674 |
| D5T5H8 | 762051 |
| D5TUC4 | 714359 |
| D5U5R5 | 526224 |
| D5ULB6 | 446466 |
| D5UW53 | 521096 |
| D5UZ09 | 521096 |
| D5V852 | 749219 |
| D5VLD9 | 509190 |
| D5W5L7 | 640511 |
| D5WE19 | 640511 |
| D5WQB9 | 562970 |
| D5WSY6 | 562970 |
| D5X7C0 | 635013 |
| D6XVG1 | 439292 |
| D6Y6N0 | 469371 |
| D6Y7F9 | 469371 |
| D6Z6B5 | 589865 |
| D6ZBD5 | 640132 |
| D6ZD99 | 640132 |
| D6ZDJ1 | 640132 |
| D6ZPC8 | 525381 |
| D6ZWL0 | 759350 |
| D7A9C1 | 639283 |
| D7AQZ2 | 583358 |
| D7AVA4 | 446468 |
| D7BHM1 | 526227 |

|        |        |
|--------|--------|
| D7CKT4 | 643648 |
| D7CXF2 | 649638 |
| D7D019 | 691437 |
| D7D496 | 691437 |
| D7DNH8 | 666681 |
| D7DS01 | 456320 |
| D7DXV4 | 551115 |
| D7EAT6 | 644295 |
| D7FF72 | 693745 |
| D7GDE3 | 754252 |
| O27390 | 187420 |
| O29458 | 2234   |
| O67262 | 63363  |
| P09890 | 1718   |
| P0A5M4 | 1773   |
| P0A5M5 | 1765   |
| P23630 | 1423   |
| P44316 | 727    |
| P55709 | 394    |
| P56129 | 210    |
| Q025Z2 | 234267 |
| Q02YQ1 | 272622 |
| Q03CW0 | 321967 |
| Q03HS9 | 278197 |
| Q03MG4 | 322159 |
| Q03YE5 | 203120 |
| Q04A09 | 321956 |
| Q04FS4 | 203123 |
| Q04IJ1 | 373153 |
| Q04VQ9 | 355277 |
| Q04XR2 | 355276 |
| Q057G6 | 372461 |
| Q05FG3 | 387662 |
| Q07H25 | 316055 |
| Q07XM3 | 318167 |
| Q0AC73 | 187272 |
| Q0ACF6 | 187272 |
| Q0AFA5 | 335283 |
| Q0AG67 | 335283 |
| Q0AIY9 | 335283 |
| Q0AX25 | 335541 |
| Q0B2E0 | 339670 |
| Q0B7S4 | 339670 |
| Q0BK47 | 393011 |
| Q0BNP8 | 393011 |
| Q0BVX5 | 391165 |

|        |        |
|--------|--------|
| Q0BWK8 | 228405 |
| Q0I5V6 | 205914 |
| Q0IBD1 | 64471  |
| Q0K660 | 381666 |
| Q0RBY7 | 326424 |
| Q0RD94 | 326424 |
| Q0SGN2 | 101510 |
| Q0SVG1 | 289380 |
| Q0T126 | 373384 |
| Q0TDZ4 | 362663 |
| Q0TTL1 | 195103 |
| Q0W3B7 | 351160 |
| Q112C4 | 203124 |
| Q11PY5 | 269798 |
| Q121Y1 | 296591 |
| Q12FF9 | 296591 |
| Q12Y77 | 259564 |
| Q13HW4 | 266265 |
| Q13TK7 | 266265 |
| Q14K42 | 393115 |
| Q15EG8 | 264    |
| Q15NG6 | 342610 |
| Q169X1 | 375451 |
| Q17YA6 | 382638 |
| Q187B7 | 272563 |
| Q188C1 | 272563 |
| Q18K14 | 362976 |
| Q1B532 | 164756 |
| Q1BIN8 | 331271 |
| Q1BPS8 | 331271 |
| Q1CAT1 | 360102 |
| Q1CFA3 | 377628 |
| Q1CUL3 | 357544 |
| Q1CZV7 | 246197 |
| Q1D9U5 | 246197 |
| Q1GLJ9 | 292414 |
| Q1GRT1 | 117207 |
| Q1GWP5 | 117207 |
| Q1GYH9 | 265072 |
| Q1I304 | 384676 |
| Q1I7P4 | 384676 |
| Q1IL09 | 204669 |
| Q1J092 | 319795 |
| Q1LI78 | 266264 |
| Q1LPD0 | 266264 |
| Q1MQX0 | 363253 |

|        |        |
|--------|--------|
| Q1QB97 | 335284 |
| Q1QEA0 | 335284 |
| Q1QHU3 | 323097 |
| Q1R7H3 | 364106 |
| Q1WTC4 | 362948 |
| Q20WU1 | 316056 |
| Q21UC6 | 338969 |
| Q220V2 | 338969 |
| Q24CD6 | 312017 |
| Q24MH6 | 138119 |
| Q28V64 | 290400 |
| Q2A1E6 | 376619 |
| Q2A5D5 | 376619 |
| Q2FYN4 | 93061  |
| Q2G1M6 | 93061  |
| Q2G4W2 | 279238 |
| Q2G5U9 | 279238 |
| Q2GGY2 | 205920 |
| Q2IYC6 | 316058 |
| Q2J1X0 | 316058 |
| Q2J5N9 | 106370 |
| Q2J6L4 | 106370 |
| Q2JL19 | 321332 |
| Q2JQX7 | 321327 |
| Q2NA26 | 314225 |
| Q2NCU4 | 314225 |
| Q2NE09 | 339860 |
| Q2NQ25 | 343509 |
| Q2NRG2 | 343509 |
| Q2P628 | 342109 |
| Q2RIR2 | 264732 |
| Q2RPL5 | 269796 |
| Q2RXE4 | 269796 |
| Q2SFZ2 | 349521 |
| Q2SQ65 | 349521 |
| Q2SU64 | 271848 |
| Q2VYN0 | 342108 |
| Q2Y5L5 | 323848 |
| Q2YR85 | 359391 |
| Q2YUV8 | 273036 |
| Q2YY19 | 273036 |
| Q30TD2 | 326298 |
| Q30XY6 | 207559 |
| Q31AD5 | 74546  |
| Q31EI4 | 317025 |
| Q31XE9 | 300268 |

|        |        |
|--------|--------|
| Q32C83 | 300267 |
| Q39M50 | 269483 |
| Q39U26 | 269799 |
| Q39Z59 | 269799 |
| Q3AAR4 | 246194 |
| Q3AJ54 | 110662 |
| Q3ARK4 | 340177 |
| Q3AX85 | 316279 |
| Q3B374 | 319225 |
| Q3BQC1 | 316273 |
| Q3IEW2 | 326442 |
| Q3IJ29 | 326442 |
| Q3ISH2 | 348780 |
| Q3IZX9 | 272943 |
| Q3J9S7 | 323261 |
| Q3JEA4 | 323261 |
| Q3JHE3 | 320372 |
| Q3JMV2 | 320372 |
| Q3JWD0 | 320372 |
| Q3MEQ0 | 240292 |
| Q3SKV2 | 292415 |
| Q3SM71 | 292415 |
| Q3YRS8 | 269484 |
| Q3YY19 | 300269 |
| Q3Z921 | 243164 |
| Q3ZZR5 | 255470 |
| Q46C06 | 269797 |
| Q46K29 | 59920  |
| Q46WI4 | 264198 |
| Q47DB1 | 159087 |
| Q47FI8 | 159087 |
| Q47M64 | 269800 |
| Q47VN2 | 167879 |
| Q480D9 | 167879 |
| Q486N2 | 167879 |
| Q48C01 | 264730 |
| Q48I40 | 264730 |
| Q493E0 | 291272 |
| Q49XK2 | 342451 |
| Q4FNK5 | 198252 |
| Q4FV86 | 259536 |
| Q4JUI2 | 306537 |
| Q4KEA8 | 220664 |
| Q4L6A5 | 279808 |
| Q4QMG9 | 281310 |
| Q4UXQ0 | 314565 |



|        |        |
|--------|--------|
| Q4ZT98 | 205918 |
| Q500B7 | 205918 |
| Q50140 | 1769   |
| Q55484 | 1148   |
| Q57AS1 | 235    |
| Q57KA4 | 28901  |
| Q57LZ4 | 28901  |
| Q58497 | 2190   |
| Q5E1W6 | 312309 |
| Q5FEQ0 | 254945 |
| Q5FFJ9 | 302409 |
| Q5FKR2 | 1579   |
| Q5FPL4 | 442    |
| Q5HAZ7 | 254945 |
| Q5HG20 | 93062  |
| Q5HJP6 | 93062  |
| Q5HPE2 | 176279 |
| Q5HWF7 | 195099 |
| Q5KXK1 | 1462   |
| Q5LBE1 | 272559 |
| Q5LXB8 | 89184  |
| Q5M1I8 | 299768 |
| Q5M630 | 264199 |
| Q5NIN9 | 119856 |
| Q5P2A8 | 76114  |
| Q5P5N4 | 76114  |
| Q5QUS5 | 135577 |
| Q5V5E3 | 2238   |
| Q5WH19 | 66692  |
| Q5Z0Z8 | 37329  |
| Q60AJ5 | 414    |
| Q62B72 | 13373  |
| Q62F85 | 13373  |
| Q62GA0 | 13373  |
| Q63DW0 | 288681 |
| Q63NJ6 | 28450  |
| Q63Q48 | 28450  |
| Q63XQ4 | 28450  |
| Q64RT6 | 817    |
| Q65HV3 | 279010 |
| Q65QR9 | 221988 |
| Q667E8 | 633    |
| Q66B85 | 633    |
| Q67NE8 | 2734   |
| Q6A8A9 | 1747   |
| Q6AG76 | 59736  |

|        |        |
|--------|--------|
| Q6AIZ1 | 84980  |
| Q6CZN7 | 29471  |
| Q6D0Z6 | 29471  |
| Q6F949 | 62977  |
| Q6G9G1 | 282459 |
| Q6GD02 | 282459 |
| Q6GH08 | 282458 |
| Q6GKI2 | 282458 |
| Q6L350 | 263820 |
| Q6LLN4 | 74109  |
| Q6LXZ3 | 39152  |
| Q6M3U1 | 1718   |
| Q6MM66 | 959    |
| Q6N0M1 | 1076   |
| Q6NHU5 | 1717   |
| Q6W1T9 | 394    |
| Q71Y62 | 265669 |
| Q728N7 | 882    |
| Q72BI9 | 882    |
| Q73B78 | 222523 |
| Q73X41 | 1770   |
| Q741V1 | 1770   |
| Q7A0X5 | 196620 |
| Q7A2R9 | 158878 |
| Q7A5P5 | 158879 |
| Q7A862 | 158879 |
| Q7CGZ1 | 632    |
| Q7MAC7 | 844    |
| Q7MT14 | 837    |
| Q7N7F9 | 141679 |
| Q7N8H2 | 141679 |
| Q7NPE5 | 33072  |
| Q7NRM3 | 536    |
| Q7TTP9 | 265606 |
| Q7U7P5 | 84588  |
| Q7ULZ0 | 265606 |
| Q7USP5 | 265606 |
| Q7V104 | 59919  |
| Q7V6T5 | 74547  |
| Q7VBI7 | 1219   |
| Q7VG17 | 32025  |
| Q7VPM5 | 730    |
| Q7VRF4 | 203907 |
| Q7VT97 | 520    |
| Q7W2C0 | 519    |
| Q7WR88 | 518    |

|         |        |
|---------|--------|
| Q7W XK3 | 381666 |
| Q81FZ3  | 226900 |
| Q81T51  | 1392   |
| Q825X0  | 33903  |
| Q82J63  | 33903  |
| Q82PI6  | 33903  |
| Q82TE0  | 915    |
| Q82VG2  | 915    |
| Q834X3  | 1351   |
| Q83QB7  | 623    |
| Q84BW0  | 87883  |
| Q87FL7  | 670    |
| Q87KJ3  | 670    |
| Q88L58  | 160488 |
| Q88WC9  | 1590   |
| Q891C4  | 1513   |
| Q89AC6  | 224915 |
| Q89UN3  | 375    |
| Q8A800  | 818    |
| Q8CP93  | 176280 |
| Q8DI31  | 197221 |
| Q8DND9  | 171101 |
| Q8DSQ3  | 1309   |
| Q8E9H4  | 70863  |
| Q8EQ80  | 182710 |
| Q8F7A1  | 173    |
| Q8FEA2  | 217992 |
| Q8FPS1  | 152794 |
| Q8FYA2  | 29461  |
| Q8G4V1  | 216816 |
| Q8KCP2  | 1097   |
| Q8NNQ3  | 1718   |
| Q8NYS3  | 196620 |
| Q8PVS6  | 2209   |
| Q8R8L4  | 119072 |
| Q8RD37  | 119072 |
| Q8RQM6  | 152794 |
| Q8TSR9  | 2214   |
| Q8TY23  | 2320   |
| Q8X MU3 | 1502   |
| Q8XSP3  | 305    |
| Q8Y5V3  | 1639   |
| Q8YJJ9  | 29459  |
| Q8YST7  | 103690 |
| Q92A56  | 1642   |
| Q94A94  | 3702   |

|        |        |
|--------|--------|
| Q97AJ0 | 273116 |
| Q97LF3 | 1488   |
| Q97NP2 | 1313   |
| Q99X92 | 158878 |
| Q9A681 | 155892 |
| Q9ADB5 | 1902   |
| Q9CG26 | 1360   |
| Q9CL23 | 747    |
| Q9HK20 | 2303   |
| Q9KCM5 | 86665  |
| Q9KVL7 | 666    |
| Q9PII5 | 197    |
| Q9RTK2 | 1299   |
| Q9X1K5 | 2336   |
| Q9X5M1 | 246196 |
| Q9Z661 | 542    |
| Q9ZBH5 | 1902   |
| Q9ZME5 | 85963  |
| A0JY83 | 290399 |
| A0NJU7 | 379360 |
| A0Q8H6 | 401614 |
| A0XX42 | 156578 |
| A0Y0E9 | 156578 |
| A0YPC8 | 313612 |
| A0Z3C3 | 247639 |
| A0ZL18 | 313624 |
| A1EP64 | 345076 |
| A1F6L6 | 412614 |
| A1HSP2 | 401526 |
| A1S2L4 | 326297 |
| A1SUR8 | 357804 |
| A1TWR5 | 351348 |
| A1X4N8 | 663    |
| A2P8B9 | 412966 |
| A2PW91 | 412883 |
| A2TUE7 | 313590 |
| A2U2G1 | 313598 |
| A2UWC1 | 399804 |
| A2UYN6 | 399804 |
| A2VHI9 | 348776 |
| A2W1H3 | 350702 |
| A2W3W5 | 350702 |
| A2W4V3 | 350702 |
| A2WV9  | 350701 |
| A3D9Q1 | 325240 |
| A3EML9 | 345075 |

|        |        |
|--------|--------|
| A3GPW9 | 417399 |
| A3GZK9 | 417400 |
| A3HV93 | 388413 |
| A3I5M2 | 388400 |
| A3ITL5 | 391612 |
| A3J0X7 | 391598 |
| A3JBA8 | 270374 |
| A3JRD4 | 388401 |
| A3K2P4 | 388399 |
| A3L484 | 350704 |
| A3LKX9 | 350703 |
| A3M7U4 | 400667 |
| A3QIG0 | 323850 |
| A3RSX0 | 342110 |
| A3SGH4 | 52598  |
| A3SLW6 | 89187  |
| A3SVN1 | 314267 |
| A3TGG2 | 313589 |
| A3TV61 | 252305 |
| A3UL16 | 314291 |
| A3UQW6 | 314291 |
| A3UXP5 | 314291 |
| A3V518 | 314232 |
| A3VBL3 | 314271 |
| A3VQK4 | 314260 |
| A3W4J8 | 314264 |
| A3W9W4 | 237727 |
| A3WBU7 | 237727 |
| A3WKF0 | 314276 |
| A3WU29 | 314253 |
| A3WUU9 | 314253 |
| A3XCL2 | 314262 |
| A3XMR1 | 398720 |
| A3Y2X4 | 314290 |
| A3YJE5 | 360111 |
| A3YQN3 | 360108 |
| A3Z1N0 | 69042  |
| A3Z7Y6 | 221360 |
| A3ZES6 | 360112 |
| A3ZJH2 | 360110 |
| A3ZKV7 | 314230 |
| A3ZS84 | 314230 |
| A4AVG8 | 313603 |
| A4BTZ6 | 314278 |
| A4C0A8 | 313594 |
| A4C7U9 | 87626  |

|        |        |
|--------|--------|
| A4CFE0 | 87626  |
| A4CVJ0 | 59931  |
| A4E7M5 | 411903 |
| A4EHP2 | 391593 |
| A4EZ79 | 388739 |
| A4KGL4 | 395095 |
| A4KPQ7 | 412422 |
| A4KT88 | 412422 |
| A4LJK5 | 425067 |
| A4LL37 | 425067 |
| A4LT04 | 425067 |
| A4MX08 | 374927 |
| A4MX09 | 374927 |
| A4N2V8 | 375432 |
| A4N7C5 | 375177 |
| A4NEZ3 | 374928 |
| A4NN88 | 374932 |
| A4NPB9 | 374933 |
| A4NWZ0 | 375063 |
| A4NWZ1 | 375063 |
| A4U0A0 | 55518  |
| A4VI90 | 379731 |
| A4XQF3 | 399739 |
| A5EB60 | 288000 |
| A5F4I7 | 345073 |
| A5J3X1 | 334802 |
| A5J559 | 334802 |
| A5J691 | 334802 |
| A5KGN1 | 398000 |
| A5KKF4 | 411460 |
| A5L0U2 | 391574 |
| A5L4A7 | 391574 |
| A5LEK1 | 406556 |
| A5LPK4 | 406557 |
| A5LTS8 | 406558 |
| A5M300 | 406559 |
| A5MAA3 | 406560 |
| A5MHP7 | 406561 |
| A5MPG5 | 406562 |
| A5MWG6 | 406563 |
| A5P7W8 | 161528 |
| A5PBB4 | 161528 |
| A5TIH6 | 370895 |
| A5TMM0 | 370895 |
| A5VYU6 | 351746 |
| A5XKY6 | 334803 |

|        |        |
|--------|--------|
| A5XR52 | 334803 |
| A5XS75 | 334803 |
| A5Z3D4 | 411463 |
| A5ZHY8 | 411901 |
| A5ZY96 | 411459 |
| A6A4H0 | 417398 |
| A6AF64 | 417397 |
| A6B3D2 | 419109 |
| A6B527 | 419109 |
| A6BEF6 | 411462 |
| A6BU78 | 412420 |
| A6CEG9 | 344747 |
| A6CMX8 | 161544 |
| A6D6V1 | 391591 |
| A6DC22 | 391592 |
| A6DEC2 | 391592 |
| A6E0S4 | 391613 |
| A6EJX5 | 391596 |
| A6EP02 | 50743  |
| A6EUN2 | 443152 |
| A6F5E8 | 443152 |
| A6FLT1 | 351016 |
| A6G555 | 391625 |
| A6GPJ4 | 391597 |
| A6GSE4 | 391597 |
| A6P1N2 | 411467 |
| A6VBN6 | 381754 |
| A6VXB8 | 400668 |
| A6WIJ4 | 402882 |
| A6XZR7 | 404974 |
| A6Y5Y8 | 345074 |
| A7A6V4 | 411481 |
| A7AJE9 | 411477 |
| A7AZ25 | 411470 |
| A7JF25 | 430557 |
| A7JF55 | 430558 |
| A7JJE0 | 430558 |
| A7JJS3 | 430558 |
| A7JNJ3 | 442346 |
| A7JNY4 | 442346 |
| A7JP21 | 442346 |
| A7JQU4 | 272629 |
| A7LQZ2 | 411476 |
| A7V9W6 | 411479 |
| A7VDF4 | 411489 |
| A7VUY3 | 428125 |

|        |        |
|--------|--------|
| A7YRW9 | 430556 |
| A7YS29 | 430556 |
| A8E959 | 360118 |
| A8EIU8 | 360118 |
| A8EM67 | 360118 |
| A8EMT0 | 360118 |
| A8KJ75 | 331978 |
| A8KPM9 | 331978 |
| A8KSQ6 | 331978 |
| A8PN39 | 59196  |
| A8S4F7 | 411902 |
| A8SAU4 | 411485 |
| A8SS00 | 411474 |
| A8TB82 | 314289 |
| A8TNR1 | 331869 |
| A8UCI1 | 333990 |
| A8UGH0 | 391603 |
| A8YKN7 | 267872 |
| A9ANZ8 | 395019 |
| A9DSM6 | 391624 |
| A9EQA8 | 383629 |
| A9GFU0 | 391619 |
| A9HH37 | 391595 |
| A9JZU1 | 412021 |
| A9K0L6 | 412021 |
| A9K589 | 412021 |
| A9KYS0 | 399599 |
| A9L5F6 | 399599 |
| A9Z747 | 373665 |
| A9ZVI9 | 404214 |
| B0AC60 | 445973 |
| B0AQL1 | 486624 |
| B0G5A3 | 411461 |
| B0GFA5 | 404218 |
| B0GN15 | 404217 |
| B0H6V3 | 404216 |
| B0HJ07 | 404215 |
| B0HVF1 | 360099 |
| B0KPJ9 | 76869  |
| B0MEI8 | 411490 |
| B0MSA7 | 428128 |
| B0NB28 | 411468 |
| B0NLI0 | 449673 |
| B0NXU3 | 411484 |
| B0P7M2 | 445972 |
| B0Q2E6 | 486619 |



|        |        |
|--------|--------|
| BOQJ43 | 486621 |
| BOQSI4 | 456298 |
| BOVEY4 | 456827 |
| B1B7K6 | 445337 |
| B1B9R6 | 445337 |
| B1BEY0 | 445334 |
| B1BUS5 | 451755 |
| B1EG20 | 502347 |
| B1EXL6 | 486623 |
| B1FER2 | 396596 |
| B1FHY3 | 396596 |
| B1G466 | 396598 |
| B1G8L2 | 396598 |
| B1GH84 | 486620 |
| B1HBV6 | 320374 |
| B1HG54 | 320374 |
| B1HL52 | 320374 |
| B1JBH4 | 390235 |
| B1Q9P7 | 445335 |
| B1QI20 | 445336 |
| B1QWR5 | 447214 |
| B1RB75 | 451754 |
| B1RJB5 | 451756 |
| B1RSS7 | 451757 |
| B1S2U4 | 453362 |
| B1SAL6 | 473819 |
| B1SH80 | 471872 |
| B1TAU8 | 396597 |
| B1UPQ0 | 486622 |
| B1V3V1 | 488537 |
| B1X5I9 | 39717  |
| B2DJT7 | 453361 |
| B2DQR1 | 453363 |
| B2DVI4 | 453364 |
| B2E229 | 453365 |
| B2E6Q5 | 453366 |
| B2ECA2 | 486409 |
| B2GZP2 | 331109 |
| B2H1K8 | 331109 |
| B2HAP8 | 331109 |
| B2NDG0 | 344610 |
| B2NTU1 | 444451 |
| B2P1U0 | 444452 |
| B2PER0 | 444453 |
| B2PU27 | 471874 |
| B3A2K1 | 478004 |

|        |        |
|--------|--------|
| B3AJ43 | 478005 |
| B3AXL3 | 478006 |
| B3BES0 | 478008 |
| B3BXU2 | 478007 |
| B3CB81 | 471870 |
| B3HAH4 | 340184 |
| B3HVB2 | 340197 |
| B3I4K7 | 340185 |
| B3IRT8 | 340186 |
| B3J978 | 405536 |
| B3JMK2 | 470145 |
| B3WHW3 | 344601 |
| B3X0S7 | 358708 |
| B3XK53 | 358709 |
| B3XRK2 | 349123 |
| B3YDC1 | 439842 |
| B3YK29 | 439842 |
| B3YWZ7 | 405917 |
| B3ZGE0 | 451707 |
| B3ZVX8 | 451709 |
| B4A1X1 | 454168 |
| B4A7C9 | 454168 |
| B4ALF6 | 536229 |
| B4APU6 | 545422 |
| B4ARI5 | 545422 |
| B4ASZ2 | 545422 |
| B4B8Q9 | 497965 |
| B4BL88 | 495036 |
| B4EPX7 | 216591 |
| B4F9R7 | 4577   |
| B4V2J2 | 465541 |
| B4V9V1 | 465541 |
| B4VE07 | 465541 |
| B4VWB2 | 118168 |
| B4VYU6 | 118168 |
| B4WEK0 | 391600 |
| B4WRA5 | 91464  |
| B4XMC6 | 210    |
| B5BZJ9 | 439846 |
| B5C7E9 | 439846 |
| B5CB71 | 454165 |
| B5CER2 | 454165 |
| B5CR34 | 471875 |
| B5CZK4 | 484018 |
| B5GAH7 | 465543 |
| B5GL73 | 443255 |

|        |        |
|--------|--------|
| B5GRM0 | 443255 |
| B5GTG4 | 443255 |
| B5GZR7 | 443255 |
| B5H3F3 | 443255 |
| B5H987 | 457429 |
| B5HMS8 | 463191 |
| B5HX53 | 463191 |
| B5INA1 | 180281 |
| B5J0K7 | 391626 |
| B5JFX5 | 382464 |
| B5KDN8 | 391616 |
| B5MIL5 | 439847 |
| B5MIQ8 | 439847 |
| B5N2D1 | 440534 |
| B5N4Q6 | 440534 |
| B5NBY3 | 454167 |
| B5NEZ2 | 454167 |
| B5NKS5 | 454231 |
| B5NP50 | 454231 |
| B5P3C5 | 454164 |
| B5P430 | 454164 |
| B5PAH5 | 465518 |
| B5PGB6 | 465518 |
| B5PTU2 | 465516 |
| B5PV06 | 465516 |
| B5Q2B8 | 465517 |
| B5Q6Z3 | 465517 |
| B5QGQ6 | 478547 |
| B5QQ68 | 486408 |
| B5RXQ9 | 305    |
| B5RXR0 | 305    |
| B5S9Z9 | 305    |
| B5UIE1 | 405533 |
| B5VAZ7 | 451708 |
| B5W5Y6 | 513049 |
| B5W648 | 513049 |
| B5WSN3 | 516466 |
| B6B0R6 | 314270 |
| B6BAW2 | 439496 |
| B6BME5 | 439483 |
| B6BRG3 | 439493 |
| B6BY43 | 473788 |
| B6C3A1 | 473788 |
| B6FN26 | 500632 |
| B6FZT5 | 500633 |
| B6R679 | 439495 |

|        |        |
|--------|--------|
| B6T3H3 | 4577   |
| B6T9Q7 | 4577   |
| B6VUM4 | 483217 |
| B6WRV9 | 411464 |
| B6XAQ2 | 520999 |
| B6XSN3 | 566552 |
| B6ZVW8 | 502346 |
| B7AGZ2 | 483216 |
| B7AS94 | 483218 |
| B7ATX9 | 483218 |
| B7BDF8 | 537006 |
| B7BDF9 | 537006 |
| B7CJK7 | 557724 |
| B7CS75 | 557724 |
| B7CXX4 | 557724 |
| B7DQ73 | 543302 |
| B7QRY8 | 439497 |
| B7R4N6 | 246969 |
| B7R5Y8 | 391606 |
| B7RE46 | 443254 |
| B7RJG9 | 391589 |
| B7S2B5 | 247634 |
| B7V059 | 557722 |
| B7WVG8 | 399795 |
| B8AH36 | 39946  |
| B8E6G0 | 407976 |
| B8KKH3 | 566466 |
| B8KSV0 | 565045 |
| B8LMH4 | 3332   |
| B8LRZ6 | 3332   |
| B9AG13 | 483214 |
| B9AYY7 | 513051 |
| B9BS89 | 513052 |
| B9CE35 | 513053 |
| B9CKR9 | 553184 |
| B9CRV8 | 553212 |
| B9CXD3 | 591023 |
| B9CYR9 | 553218 |
| B9F5G8 | 39947  |
| B9NL48 | 467661 |
| B9P2H6 | 93058  |
| B9XQ08 | 320771 |
| B9XTN7 | 544405 |
| B9XXR4 | 544406 |
| B9Z1R7 | 279714 |
| C0A5W7 | 278957 |

|        |        |
|--------|--------|
| C0AXW5 | 471881 |
| C0AXW6 | 471881 |
| COB5E3 | 470146 |
| COBJE3 | 487796 |
| COBMM9 | 487797 |
| COBUZ9 | 547043 |
| COC3Y7 | 553973 |
| COCHB0 | 476272 |
| COE777 | 566549 |
| COEJ57 | 537013 |
| COETH0 | 411469 |
| COFV71 | 622312 |
| COG813 | 595497 |
| COGG16 | 555088 |
| COPQH1 | 3332   |
| COQL45 | 177437 |
| COVID6 | 525244 |
| COVTF5 | 548477 |
| COWES1 | 563191 |
| COWFN9 | 525260 |
| COWRR4 | 525318 |
| COWYX0 | 525325 |
| COX595 | 491074 |
| COXH31 | 525327 |
| COXPG3 | 525263 |
| COY0S4 | 595498 |
| COYAH0 | 595498 |
| COYE75 | 595498 |
| COYLK8 | 525257 |
| COZ0S2 | 585517 |
| C1DQ07 | 322710 |
| C1E2J1 | 296587 |
| C1HIR6 | 469598 |
| C1IBA2 | 457396 |
| C1MB16 | 469595 |
| C1N8V1 | 564608 |
| C1ND51 | 457400 |
| C1PEU8 | 345219 |
| C1V497 | 469382 |
| C2BKB7 | 525264 |
| C2BQS4 | 525264 |
| C2BZ29 | 525367 |
| C2C566 | 592313 |
| C2CL27 | 525268 |
| C2CPV8 | 525268 |
| C2D2Q4 | 525310 |

|        |        |
|--------|--------|
| C2DCZ1 | 525278 |
| C2DXP2 | 525281 |
| C2E689 | 525330 |
| C2E916 | 525362 |
| C2EFS4 | 525364 |
| C2EML0 | 525365 |
| C2ESS7 | 525366 |
| C2EWS3 | 491077 |
| C2F3S1 | 548485 |
| C2FAU5 | 525337 |
| C2FIS8 | 525338 |
| C2FUS3 | 525372 |
| C2G765 | 548473 |
| C2GC80 | 548473 |
| C2GJ15 | 548478 |
| C2GQH8 | 525341 |
| C2GWM6 | 548480 |
| C2H549 | 525271 |
| C2HNU4 | 525306 |
| C2HT64 | 593585 |
| C2I1U1 | 593586 |
| C2IED8 | 593589 |
| C2IX92 | 593590 |
| C2JI58 | 593587 |
| C2JK10 | 491075 |
| C2JTL6 | 525361 |
| C2KC68 | 491076 |
| C2KKV6 | 586220 |
| C2LMI4 | 525369 |
| C2LMX9 | 525369 |
| C2LPV4 | 596322 |
| C2M0I7 | 629742 |
| C2M4Z7 | 553178 |
| C2MI83 | 526973 |
| C2MYB2 | 526980 |
| C2NF29 | 526970 |
| C2NWC1 | 526967 |
| C2PCD9 | 526971 |
| C2PTF4 | 526972 |
| C2Q9F6 | 526968 |
| C2QQG6 | 526977 |
| C2R5J8 | 526969 |
| C2RKJ5 | 526974 |
| C2S188 | 526975 |
| C2SHR9 | 526976 |
| C2SYF0 | 526978 |

|        |        |
|--------|--------|
| C2TE01 | 526979 |
| C2TUR7 | 526981 |
| C2UBC0 | 526982 |
| C2USU1 | 526983 |
| C2V989 | 526984 |
| C2VR48 | 526985 |
| C2W5T8 | 526986 |
| C2WJX0 | 526987 |
| C2WZ98 | 526988 |
| C2X9A0 | 526989 |
| C2XRG0 | 526990 |
| C2Y812 | 526991 |
| C2YP42 | 526992 |
| C2Z5C4 | 526993 |
| C2ZLZ0 | 526994 |
| C3A3H5 | 526997 |
| C3AJG4 | 526998 |
| C3B0U9 | 526999 |
| C3BHZ5 | 527000 |
| C3BZS6 | 527024 |
| C3CG86 | 527021 |
| C3CZ42 | 527025 |
| C3DHB0 | 527026 |
| C3E108 | 527027 |
| C3EIA1 | 527023 |
| C3EZ29 | 527022 |
| C3FHM2 | 527031 |
| C3G0E7 | 527032 |
| C3GG94 | 527029 |
| C3GYH2 | 527030 |
| C3HFX9 | 527028 |
| C3HXV7 | 527019 |
| C3IGX9 | 527020 |
| C3IYJ7 | 550542 |
| C3JI44 | 596309 |
| C3JU72 | 596309 |
| C3K4N0 | 216595 |
| C3PUW8 | 457395 |
| C3QFQ5 | 556258 |
| C3R1I7 | 469590 |
| C3R725 | 556260 |
| C3SWE2 | 562    |
| C3SWE3 | 562    |
| C3SWE5 | 562    |
| C3WCK4 | 469616 |
| C3X6K1 | 556268 |

|        |        |
|--------|--------|
| C3XCS2 | 556269 |
| C3XP10 | 556267 |
| C4APP0 | 320390 |
| C4AUT1 | 320390 |
| C4B1W1 | 320390 |
| C4EYS3 | 521005 |
| C4F487 | 521004 |
| C4FDJ7 | 518635 |
| C4FQE6 | 546273 |
| C4G7A9 | 592010 |
| C4G9C1 | 626523 |
| C4GL29 | 629741 |
| C4H1T9 | 547047 |
| C4HL01 | 547046 |
| C4HS89 | 545431 |
| C4I721 | 536230 |
| C4I9W1 | 536230 |
| C4ID32 | 632245 |
| C4IT12 | 641140 |
| C4MCM3 | 326425 |
| C4RH45 | 219305 |
| C4RNE3 | 219305 |
| C4RQ99 | 219305 |
| C4RZK2 | 349968 |
| C4SAM9 | 349967 |
| C4SKL4 | 349966 |
| C4T0W3 | 349965 |
| C4U144 | 527012 |
| C4U9A8 | 527002 |
| C4UIA2 | 527005 |
| C4UVM1 | 527004 |
| C4V4W4 | 638302 |
| C4VE38 | 553209 |
| C4WAW0 | 596319 |
| C4ZLI7 | 85643  |
| C4ZNI8 | 85643  |
| C5EDD7 | 537937 |
| C5EEK2 | 457421 |
| C5F203 | 537972 |
| C5F628 | 537973 |
| C5N0Z7 | 450394 |
| C5N5G0 | 450394 |
| C5NAN0 | 436115 |
| C5NE62 | 436115 |
| C5NLS6 | 436115 |
| C5PUM7 | 525373 |



|        |        |
|--------|--------|
| C5Q1C2 | 548474 |
| C5Q935 | 525374 |
| C5QEI3 | 548475 |
| C5QJ31 | 548475 |
| C5QSD5 | 525378 |
| C5QX10 | 525376 |
| C5RCN5 | 585506 |
| C5RHU1 | 573061 |
| C5RSK1 | 573062 |
| C5RYI0 | 637911 |
| C5SPM6 | 573065 |
| C5T915 | 573060 |
| C5TGW6 | 555217 |
| C5TVZ5 | 573059 |
| C5U105 | 573059 |
| C5UBB0 | 509193 |
| C5UWR5 | 536233 |
| C5V146 | 395494 |
| C5VDY6 | 553207 |
| C5VIM1 | 553174 |
| C5W8E0 | 511693 |
| C5ZEG4 | 357347 |
| C5ZJ63 | 357347 |
| C5ZMH3 | 357347 |
| C5ZXT6 | 537970 |
| C6EJ30 | 469008 |
| C6I6B5 | 457392 |
| C6ISS0 | 469586 |
| C6J3Y5 | 621372 |
| C6JBB7 | 457412 |
| C6JKY2 | 469618 |
| C6LBQ5 | 478749 |
| C6MBL4 | 153948 |
| C6MBM0 | 153948 |
| C6MKX0 | 443143 |
| C6NSY6 | 637389 |
| C6PB15 | 580327 |
| C6PNR4 | 536227 |
| C6PQG3 | 536227 |
| C6PQG4 | 536227 |
| C6QHI8 | 582899 |
| C6QPA6 | 581103 |
| C6R264 | 553201 |
| C6R8I6 | 553206 |
| C6R938 | 553206 |
| C6RE63 | 553219 |
| C6RQS3 | 596318 |
| C6RTZ3 | 661513 |
| C6TA11 | 3847   |
| C6TSL8 | 320371 |
| C6TZY4 | 320371 |
| C6U7K7 | 320371 |
| C6YLU2 | 345072 |

|        |        |
|--------|--------|
| C6YMH1 | 543737 |
| C6YR44 | 543737 |
| C6YTA4 | 539329 |
| C6YTY0 | 539329 |
| C6Z1U7 | 457394 |
| C7CT11 | 565636 |
| C7D3Q8 | 565637 |
| C7DCH9 | 633131 |
| C7G8Y6 | 536231 |
| C7G8Y7 | 536231 |
| C7HDU3 | 572545 |
| C7HKU5 | 588857 |
| C7IJ27 | 588581 |
| C7IP24 | 589861 |
| C7JLT4 | 634453 |
| C7JW02 | 634454 |
| C7K694 | 634455 |
| C7KFG3 | 634456 |
| C7KPS9 | 634457 |
| C7KZ44 | 634458 |
| C7L8W8 | 634459 |
| C7U7M3 | 565638 |
| C7UGJ8 | 565642 |
| C7UNZ2 | 565641 |
| C7UV60 | 565650 |
| C7V5H9 | 565640 |
| C7VCI2 | 565644 |
| C7VNI2 | 565646 |
| C7VVX7 | 565649 |
| C7W2R5 | 565647 |
| C7WA47 | 565648 |
| C7WKJ4 | 565643 |
| C7WP03 | 565651 |
| C7X230 | 565645 |
| C7XCF6 | 563193 |
| C7XGF9 | 575595 |
| C7XU12 | 575594 |
| C7Y2G9 | 575596 |
| C7YAT7 | 565639 |
| C7ZTC9 | 585143 |
| C7ZX08 | 585143 |
| C8A109 | 585145 |
| C8A3U5 | 585145 |
| C8A7E3 | 585146 |
| C8ABS4 | 585146 |
| C8AFX4 | 585153 |
| C8AKT4 | 585153 |
| C8AP92 | 585158 |
| C8ARU0 | 585158 |
| C8JRU0 | 393124 |
| C8K2E1 | 393125 |
| C8KBN7 | 393128 |
| C8KLN0 | 452948 |
| C8KPH4 | 452948 |

|        |        |
|--------|--------|
| C8KUK9 | 455227 |
| C8KW78 | 455227 |
| C8L4L9 | 553565 |
| C8L6Z5 | 553565 |
| C8LCL1 | 553567 |
| C8LCT6 | 553567 |
| C8LFN0 | 553568 |
| C8LK13 | 553568 |
| C8LP03 | 553571 |
| C8LVE2 | 553571 |
| C8M0R7 | 553573 |
| C8M347 | 553573 |
| C8M619 | 553581 |
| C8M8R4 | 553581 |
| C8ME64 | 553583 |
| C8MFT1 | 553583 |
| C8MIR7 | 553588 |
| C8MKP7 | 553588 |
| C8MT33 | 553592 |
| C8MVQ9 | 553592 |
| C8N2E4 | 553596 |
| C8N5G6 | 553596 |
| C8NBU4 | 638300 |
| C8NKX1 | 196164 |
| C8NLB5 | 196164 |
| C8NVB0 | 585529 |
| C8P7Q7 | 525309 |
| C8PNW2 | 596324 |
| C8PV25 | 553217 |
| C8QF20 | 592316 |
| C8RPY7 | 525262 |
| C8S2D2 | 371731 |
| C8SXQ4 | 667127 |
| C9CSI7 | 644076 |
| C9KMP8 | 500635 |
| C9KRP7 | 483215 |
| C9LB40 | 537007 |
| C9MOD7 | 585520 |
| C9MEQ0 | 656913 |
| C9MFC0 | 656912 |
| C9MKZ9 | 649761 |
| C9MWZ6 | 634994 |
| C9N540 | 591167 |
| C9NAG3 | 591167 |
| C9NBP0 | 591167 |
| C9NLU8 | 675814 |
| C9P0R9 | 675813 |
| C9PAI4 | 675811 |
| C9PNJ3 | 667128 |
| C9PZB1 | 619693 |
| C9Q2S6 | 675810 |
| C9QBT8 | 675816 |
| C9QZS5 | 536056 |
| C9T3N5 | 520459 |

|        |        |
|--------|--------|
| C9TD67 | 520460 |
| C9TNX6 | 520463 |
| C9TW50 | 520461 |
| C9U690 | 520454 |
| C9UFG5 | 520452 |
| C9UPQ4 | 520451 |
| C9UUP5 | 520450 |
| C9VIK8 | 520457 |
| C9VWE9 | 520455 |
| C9XB49 | 568708 |
| C9XG46 | 568708 |
| D0AYD0 | 575591 |
| D0B3M9 | 224914 |
| D0BEG1 | 520488 |
| D0BWM6 | 575564 |
| D0CBH1 | 575584 |
| D0CK19 | 166314 |
| D0CQ97 | 644107 |
| D0DAH9 | 501479 |
| D0DEW5 | 575597 |
| D0DRF6 | 575599 |
| D0GCS1 | 520465 |
| D0GLI2 | 596323 |
| D0GWF7 | 675806 |
| D0H1B1 | 675807 |
| D0HAY2 | 675820 |
| D0HKW4 | 675808 |
| D0I357 | 675812 |
| D0IMG7 | 675815 |
| D0IRF8 | 290847 |
| D0JGY7 | 637382 |
| D0JRF7 | 637385 |
| D0JYJ1 | 684950 |
| D0P9I5 | 520489 |
| D0PM67 | 520487 |
| D0RKF3 | 437701 |
| D0RWE2 | 469609 |
| D0S154 | 575585 |
| D0SBU6 | 575586 |
| D0SK97 | 575587 |
| D0SWR2 | 575588 |
| D0SXG2 | 575588 |
| D0T4W4 | 575589 |
| D0TGT2 | 469589 |
| D0TW93 | 469588 |
| D0WHI9 | 649764 |
| D0WRR7 | 649743 |
| D0WTM8 | 674977 |
| D0WTM9 | 674977 |
| D0WTR9 | 674977 |
| D0XB21 | 673519 |
| D0XJL9 | 633149 |
| D0Z0U2 | 675817 |
| D0ZQL6 | 588858 |

|        |        |
|--------|--------|
| D0ZVX2 | 588858 |
| D1B959 | 525903 |
| D1CU91 | 520449 |
| D1EP32 | 520462 |
| D1F0C8 | 520464 |
| D1F5B4 | 520466 |
| D1FGI7 | 520458 |
| D1GU97 | 663951 |
| D1GUN4 | 663951 |
| D1JE14 | 115547 |
| D1JTE9 | 469587 |
| D1K0H3 | 457391 |
| D1K122 | 457391 |
| D1N960 | 340101 |
| D1NE24 | 456482 |
| D1NMD4 | 492476 |
| D1P5X3 | 500637 |
| D1P964 | 537011 |
| D1PL49 | 411471 |
| D1PV64 | 585502 |
| D1QAX5 | 553594 |
| D1QDM1 | 553594 |
| D1QJI8 | 553601 |
| D1QLW9 | 553601 |
| D1QMU6 | 649760 |
| D1QX82 | 553574 |
| D1R1C9 | 553574 |
| D1RZM0 | 682634 |
| D1S852 | 644283 |
| D1SFJ6 | 644283 |
| D1STP1 | 643561 |
| D1TRJ9 | 687916 |
| D1USD5 | 640510 |
| D1V7I9 | 298654 |
| D1VJ48 | 298654 |
| D1W172 | 679189 |
| D1W584 | 679190 |
| D1WNM1 | 596317 |
| D1WTQ2 | 649189 |
| D1WZC0 | 649189 |
| D1X416 | 649189 |
| D1XDG0 | 647653 |
| D1XI32 | 647653 |
| D1XTN2 | 647653 |
| D1XXR7 | 553171 |
| D1YBY7 | 679194 |
| D1YRJ4 | 686660 |
| D2A6Z4 | 591020 |
| D2AKM3 | 510831 |
| D2DKE7 | 3847   |
| D2ENA8 | 563037 |
| D2F0K1 | 585543 |
| D2F3E3 | 585149 |
| D2F6V8 | 585149 |

|        |        |
|--------|--------|
| D2FD04 | 585151 |
| D2FHG7 | 585151 |
| D2FIH3 | 585152 |
| D2FRT6 | 585159 |
| D2FV89 | 585159 |
| D2G1R1 | 585160 |
| D2G535 | 585160 |
| D2GAL0 | 585161 |
| D2GDJ9 | 585161 |
| D2GG41 | 585148 |
| D2GIF3 | 585148 |
| D2GMT9 | 585150 |
| D2GRF0 | 585150 |
| D2M0A7 | 649639 |
| D2M0A8 | 649639 |
| D2M823 | 652103 |
| D2MRG4 | 683082 |
| D2N049 | 683083 |
| D2N3H5 | 523796 |
| D2N727 | 523796 |
| D2NM19 | 431946 |
| D2T693 | 644651 |
| D2U064 | 638    |
| D2UIQ5 | 585155 |
| D2UM21 | 585155 |
| D2US18 | 585147 |
| D2UW17 | 585147 |
| D2W6V1 | 5762   |
| D2XE03 | 703222 |
| D2YCP3 | 671074 |
| D2YT22 | 671076 |
| D2Z890 | 469381 |
| D2ZJU8 | 500639 |
| D2ZNL4 | 521002 |
| D3A9H4 | 566550 |
| D3C3P7 | 648999 |
| D3CDG1 | 648999 |
| D3ERG2 | 703339 |
| D3EWE2 | 703339 |
| D3FLR8 | 567106 |
| D3GST5 | 216592 |
| D3HZA7 | 575611 |
| D3I626 | 575612 |
| D3IG37 | 575615 |
| D3KJD2 | 393121 |
| D3L8Q3 | 655225 |
| D3LQM1 | 596312 |
| D3LUB1 | 699218 |
| D3MGB9 | 679195 |
| D3ML93 | 686659 |
| D3NET4 | 640512 |
| D3NMG0 | 663278 |
| D3R6S2 | 552531 |
| D4BGS3 | 500640 |

|        |        |
|--------|--------|
| D4BQC8 | 518634 |
| D4C4J3 | 521000 |
| D4CGN9 | 411486 |
| D4CJS2 | 608534 |
| D4E278 | 667129 |
| D4EDE9 | 694569 |
| D4EQ82 | 699185 |
| D4ERM0 | 699186 |
| D4FGQ9 | 679188 |
| D4FIU5 | 525375 |
| D4FR00 | 655813 |
| D4FYB1 | 645657 |
| D4IWH0 | 657324 |
| D4J9X1 | 717962 |
| D4JIY5 | 657317 |
| D4JMB3 | 657317 |
| D4JUK6 | 657319 |
| D4JZ96 | 718252 |
| D4KBX6 | 657322 |
| D4KHP3 | 657316 |
| D4KKM4 | 657315 |
| D4KUX8 | 718255 |
| D4L842 | 657321 |
| D4LB01 | 213810 |
| D4LSM2 | 657314 |
| D4M510 | 657313 |
| D4MAX0 | 651822 |
| D4MB85 | 657310 |
| D4MMW1 | 717961 |
| D4MRM5 | 245012 |
| D4MY95 | 245018 |
| D4PN82 | 393117 |
| D4PV03 | 393131 |
| D4Q2Q3 | 401650 |
| D4RW46 | 511680 |
| D4SCQ2 | 585531 |
| D4SUC3 | 427081 |
| D4T6T8 | 427082 |
| D4THX9 | 533240 |
| D4TPG0 | 533247 |
| D4TPL2 | 533247 |
| D4U5M9 | 553590 |
| D4UAD2 | 553590 |
| D4UC68 | 553580 |
| D4UEW8 | 553580 |
| D4UKT4 | 246199 |
| D4UVZ3 | 791166 |
| D4V6J6 | 702446 |
| D4VE40 | 702446 |
| D4VTA0 | 702447 |
| D4W5Y3 | 702450 |
| D4WL26 | 702443 |
| D4WSX3 | 702444 |
| D4XFE2 | 742159 |

|        |        |
|--------|--------|
| D4XSH1 | 707232 |
| D4XXX9 | 552811 |
| D4Y2P3 | 634956 |
| D4YHF9 | 655812 |
| D4YKA1 | 585530 |
| D4YRH8 | 585524 |
| D4ZRL6 | 696747 |
| D5A557 | 696747 |
| D5AJI0 | 423211 |
| D5CZR9 | 714962 |
| D5ED53 | 572547 |
| D5HEL0 | 751585 |
| D5N2Z0 | 703612 |
| D5NGU5 | 243261 |
| D5NNG9 | 243261 |
| D5NZH9 | 649754 |
| D5PGH4 | 525368 |
| D5PPX5 | 525370 |
| D5PVI3 | 525370 |
| D5Q3R4 | 525259 |
| D5QDC7 | 714995 |
| D5QMM5 | 595536 |
| D5R473 | 642492 |
| D5RT72 | 525371 |
| D5RZW8 | 525258 |
| D5S6J4 | 760570 |
| D5SGF2 | 762948 |
| D5TIN5 | 573236 |
| D5V9D2 | 749219 |
| D5VR93 | 573063 |
| D5VXB0 | 758678 |
| D5XSS2 | 515617 |
| D5Y2T5 | 520141 |
| D5YEE1 | 520140 |
| D5YQS3 | 515616 |
| D5Z2K5 | 537209 |
| D5ZF55 | 537210 |
| D5ZXE6 | 566461 |
| D5ZXV9 | 566461 |
| D6AH11 | 457431 |
| D6ANM1 | 457431 |
| D6APU5 | 457431 |
| D6B2Y5 | 457425 |
| D6B6T2 | 457425 |
| D6CKT3 | 426114 |
| D6DEY3 | 717608 |
| D6DXG1 | 718254 |
| D6E416 | 657318 |
| D6EIA0 | 457428 |
| D6ETB7 | 457428 |
| D6F3Q0 | 611302 |
| D6FRD7 | 611304 |
| D6GIQ4 | 469608 |
| D6H2R7 | 585156 |



|        |        |
|--------|--------|
| D6HDC3 | 585144 |
| D6HGQ0 | 585144 |
| D6I0F9 | 550672 |
| D6ICR6 | 550676 |
| D6IUH3 | 656380 |
| D6J063 | 585157 |
| D6J3U3 | 585157 |
| D6JEG8 | 550677 |
| D6JSY4 | 575565 |
| D6KFN6 | 645465 |
| D6KFZ4 | 645465 |
| D6KI23 | 457416 |
| D6KN79 | 450749 |
| D6KUZ4 | 641146 |
| D6LQJ9 | 520448 |
| D6LU57 | 585154 |
| D6LXP4 | 585154 |
| D6M569 | 465543 |
| D6MHI8 | 536227 |
| D6SE70 | 548470 |
| D6SH11 | 548470 |
| D6SK87 | 555779 |
| D6T4N2 | 553577 |
| D6T595 | 553577 |
| D6TNL9 | 485913 |
| D6UAL8 | 762962 |
| D6UEL5 | 762962 |
| D6UJ06 | 585535 |
| D6URU4 | 682795 |
| D6V3L9 | 666684 |
| D6VC20 | 596153 |
| D6VG96 | 596153 |
| D6XNQ5 | 637913 |
| D7BR62 | 749414 |
| D7BUY5 | 749414 |
| D7BX85 | 749414 |
| D7C4F7 | 749414 |
| D7C6L9 | 749414 |
| D7CG10 | 749414 |
| D7EQ83 | 515615 |
| D7H090 | 520453 |
| D7HSL2 | 412967 |
| D7I0M9 | 693985 |
| D7I3R2 | 693985 |
| D7IF77 | 469585 |
| D7IN94 | 469592 |
| D7IS37 | 469592 |
| D7J439 | 585544 |
| D7JTD0 | 656379 |
| D7K2K7 | 457390 |
| D7M4D7 | 81972  |
| D7NAV0 | 563008 |
| O05321 | 294    |
| O69203 | 42198  |

|        |        |
|--------|--------|
| P41023 | 1471   |
| Q00SQ4 | 70448  |
| Q02GS2 | 208963 |
| Q05XX0 | 221359 |
| Q05ZQ5 | 313625 |
| Q088K9 | 318167 |
| Q09C53 | 378806 |
| Q0EXI7 | 314345 |
| Q0FD96 | 367336 |
| Q0FQL9 | 314265 |
| Q0HEE4 | 60480  |
| Q0HZK7 | 60481  |
| Q12JM3 | 318161 |
| Q12RQ2 | 318161 |
| Q1AHV3 | 1901   |
| Q1IEG8 | 384676 |
| Q1N7A0 | 314266 |
| Q1N9M1 | 314266 |
| Q1QET2 | 335284 |
| Q1V1H0 | 314261 |
| Q1V617 | 314288 |
| Q1VG54 | 314288 |
| Q1W0J1 | 313595 |
| Q1YG96 | 287752 |
| Q1YY74 | 314280 |
| Q1ZRK8 | 314292 |
| Q26EF7 | 156586 |
| Q2B690 | 313627 |
| Q2BI40 | 207954 |
| Q2CDR0 | 314256 |
| Q2FU42 | 323259 |
| Q2PYI0 | 360423 |
| Q2T3G6 | 271848 |
| Q2YZL0 | 120858 |
| Q31RM5 | 1140   |
| Q399B0 | 269483 |
| Q3EVC5 | 339854 |
| Q3K4R9 | 205922 |
| Q3KI62 | 205922 |
| Q40KA9 | 332415 |
| Q45R97 | 1906   |
| Q46AI7 | 269797 |
| Q46UZ1 | 264198 |
| Q48DZ9 | 264730 |
| Q4C249 | 165597 |
| Q4C4S2 | 165597 |
| Q4EGU3 | 267410 |
| Q4EP55 | 267409 |
| Q4FVQ5 | 259536 |
| Q4HG49 | 306254 |
| Q4HT95 | 306264 |
| Q4KID4 | 220664 |
| Q4LC06 | 63612  |
| Q4MSP6 | 269801 |

|        |        |
|--------|--------|
| Q4ZNJ5 | 205918 |
| Q56ZB3 | 3702   |
| Q5N2M9 | 269084 |
| Q5SEM5 | 305    |
| Q5YQ26 | 37329  |
| Q648W0 | 285373 |
| Q64AF8 | 285379 |
| Q64CN4 | 286721 |
| Q64DW7 | 285367 |
| Q69AA7 | 715    |
| Q6F8V3 | 62977  |
| Q6X7U0 | 1280   |
| Q73NP3 | 158    |
| Q76E49 | 17     |
| Q7CYS1 | 176299 |
| Q82BT8 | 33903  |
| Q82HL1 | 33903  |
| Q88PI6 | 160488 |
| Q8E9X6 | 70863  |
| Q8GRA5 | 670    |
| Q8PS97 | 2209   |
| Q8TMD1 | 2214   |
| Q93AT7 | 556    |
| Q9EV35 | 1280   |
| Q9F0I3 | 380    |
| Q9HVQ3 | 287    |

**aminoadipate-semialdehyde dehydrogenase large subunit**

| UniProt | TXID   |
|---------|--------|
| P07702  | 4932   |
| D6VQB4  | 559292 |
| B5VE77  | 545124 |
| D3UEK8  | 643680 |
| C7GUL2  | 574961 |
| C5DUG5  | 559307 |
| Q6CVV0  | 28985  |
| Q8NJ21  | 28985  |
| Q6FMI5  | 5478   |
| C5DL66  | 559295 |
| A7TQ42  | 436907 |
| Q5AJ13  | 5476   |
| Q5AI83  | 5476   |
| C4YEZ3  | 5476   |
| B9W763  | 573826 |
| C4QXL0  | 644223 |
| A5DVY1  | 36914  |
| A3LX21  | 4924   |
| Q9P3Y3  | 4920   |

**aminoadipate-semialdehyde dehydrogenase small subunit**

| UniProt | TXID   |
|---------|--------|
| P50113  | 4932   |
| D6VTZ7  | 559292 |
| A6ZU31  | 307796 |
| C8Z897  | 643680 |
| C7GPQ2  | 574961 |
| B5VIH5  | 545124 |
| B3LHK7  | 285006 |
| C5DPD8  | 559307 |
| Q6CNY7  | 28985  |
| Q6FV34  | 5478   |
| C5DMR6  | 559295 |
| A7TIP9  | 436907 |
| Q74Z24  | 33169  |
| C4Y3S8  | 306902 |
| B5RUX9  | 4959   |

**bifunctional aspartokinase/homoserine dehydrogenase 1**

| UniProt | TXID   |
|---------|--------|
| Q9SA18  | 3702   |
| D7KK95  | 81972  |
| C1EGY7  | 296587 |
| Q011B0  | 70448  |
| B8LAH8  | 391601 |
| A0M2U0  | 411154 |
| B3EL41  | 331678 |
| A4AQY1  | 313603 |
| Q1VVK5  | 313595 |
| A7JPY9  | 272629 |
| C6C9D2  | 579405 |
| C7PUU9  | 485918 |
| D0ZC11  | 498217 |
| D3V4Q4  | 406818 |
| C5S1U6  | 637911 |
| D4IF04  | 716540 |
| Q493T0  | 291272 |
| B9CWP1  | 591023 |
| B8F6B2  | 557723 |

|        |        |        |        |
|--------|--------|--------|--------|
| C4Y8B8 | 306902 | B0QSA9 | 456298 |
| B5RTF4 | 4959   | D4EGM0 | 694569 |
| A5DNA8 | 4929   | C9R4Y7 | 668336 |
| Q75BB3 | 33169  | Q0I3T2 | 205914 |
| Q6C6T5 | 4952   | A0KMM1 | 380703 |
| A6ZL61 | 307796 | A0KUA5 | 94122  |
| B6JWU4 | 402676 | A0Q5A5 | 401614 |
| Q1W284 | 4944   | A1A755 | 405955 |
| P40976 | 4896   | A1BJF3 | 290317 |
| Q5B1H0 | 162425 | A1JJC6 | 393305 |
| C8VFX8 | 227321 | A1RHH5 | 351745 |
| C4JRL7 | 336963 | A1S406 | 326297 |
| C5FUL3 | 554155 | A1SUD7 | 357804 |
| B6HVV2 | 500485 | A3D1Y2 | 325240 |
| O74298 | 5076   | A3MYX2 | 416269 |
| A1CWM6 | 331117 | A3QBV2 | 323850 |
| Q4WQ17 | 5085   | A3U8K7 | 216432 |
| B0Y6V5 | 451804 | A4CK37 | 313596 |
| Q0CQS7 | 341663 | A4IZJ0 | 418136 |
| Q2UJS3 | 5062   | A4S2Z7 | 436017 |
| C5PGC9 | 222929 | A4SGM7 | 290318 |
| A1CI56 | 5057   | A4SQ69 | 382245 |
| A2QJ10 | 425011 | A4TQH0 | 386656 |
| D4DCW8 | 663202 | A4W6C1 | 399742 |
| D4B1F0 | 663331 | A4Y921 | 319224 |
| B8N3B0 | 332952 | A5FGQ9 | 376686 |
| C5MF39 | 294747 | A5FJU6 | 376686 |
| B2W755 | 426418 | A5IJM8 | 390874 |
| Q0UKD0 | 13684  | A5UB53 | 374930 |
| B0D6R6 | 486041 | A6GW97 | 402612 |
| A7ES80 | 665079 | A6L201 | 435590 |
| Q5KEK6 | 5207   | A6L8N2 | 435591 |
| Q4PDW6 | 5270   | A6T4E2 | 272620 |
| A6SKS3 | 332648 | A6VMH4 | 339671 |
| D5GM33 | 39416  | A6WKT3 | 402882 |
| D6RQF5 | 240176 | A7FMF3 | 349747 |
| B6Q471 | 441960 | A7K433 | 150340 |
| Q9P3Q7 | 5141   | A7MIJ8 | 290339 |
| Q2KGK3 | 242507 | A7MXN1 | 338187 |
| A4RCF1 | 148305 | A7NAJ4 | 458234 |
| C1GLF6 | 502780 | A7ZH91 | 331111 |
| Q2HER4 | 38033  | A7ZVW1 | 331112 |
| D2EBC1 | 31870  | A8ALV5 | 290338 |
| C0SCF5 | 482561 | A8F6Y7 | 416591 |
| C1HB82 | 502779 | A8FSG3 | 425104 |
| C5JVP0 | 559298 | A8G9J9 | 399741 |

|        |        |        |        |
|--------|--------|--------|--------|
| C5GNN8 | 559297 | A8H1F6 | 398579 |
| B2AAT6 | 5145   | A8J1S7 | 3055   |
| D1Z4D9 | 5147   | A8Z601 | 444179 |
| C0NYE7 | 447093 | A9L5R2 | 399599 |
| C6HQN3 | 544712 | A9MXH0 | 272994 |
| A6RHI4 | 339724 | A9R026 | 349746 |
| C9SKY6 | 526221 | A9SKI1 | 145481 |
| C7Z7H8 | 660122 | A9TAK5 | 145481 |
| B8M7P6 | 441959 | B0RSK5 | 509169 |
| A8PSD0 | 425265 | B0TJ92 | 458817 |
| D2UYT1 | 5762   | B0TZ90 | 484022 |
| Q84BC7 | 76335  | B0U3B9 | 405440 |
| Q84BC8 | 76335  | B0UWP5 | 228400 |
| A0ZLL9 | 313624 | B1IRH1 | 481805 |
| A0Z9S0 | 313624 | B1JL14 | 502800 |
| Q70LM4 | 54914  | B1KI84 | 392500 |
| Q70LM5 | 54914  | B1L8U8 | 126740 |
| C0ZDR8 | 358681 | B1LF71 | 439855 |
| A8YL71 | 267872 | B1VJ39 | 529507 |
| A8YH74 | 267872 | B1XBC7 | 316385 |
| B0JHR0 | 449447 | B2FPL2 | 522373 |
| B7KLZ3 | 65393  | B2I5Y7 | 405441 |
| B7KLZ5 | 65393  | B2K3L1 | 502801 |
| B7KM98 | 65393  | B2SFN8 | 441952 |
| Q93TX2 | 41     | B2SLB1 | 360094 |
| Q9F636 | 41     | B2U218 | 344609 |
| A8ZKN8 | 329726 | B2VH19 | 338565 |
| Q5V8A8 | 158786 | B3EHJ1 | 290315 |
| Q1D3T0 | 246197 | B3H092 | 537457 |
| Q1D693 | 246197 | B3QL61 | 517417 |
| D3P854 | 137722 | B3QZD1 | 517418 |
| B9K534 | 311402 | B4RXF4 | 314275 |
| Q50858 | 34     | B4S3X5 | 290512 |
| C2NRS5 | 526970 | B4SGC5 | 324925 |
| C3GUE4 | 527029 | B4STM9 | 391008 |
| A1TW55 | 397945 | B4T6C5 | 423368 |
| C8TER5 | 329562 | B4TIA3 | 454169 |
| D0N1R2 | 403677 | B4TVY4 | 439843 |
| A4XD37 | 369723 | B5BLG8 | 554290 |
| C0YUT9 | 525257 | B5F6C1 | 454166 |
| C0YPM9 | 525257 | B5FAK2 | 388396 |
| A8LVF1 | 391037 | B5FH96 | 439851 |
| B1K8A4 | 406425 | B5R5H4 | 550537 |
| D3NBE6 | 640512 | B5REZ8 | 550538 |
| B0CN27 | 1914   | B5Y255 | 507522 |
| Q1BKK7 | 331271 | B5YNN0 | 35128  |

|        |        |        |        |
|--------|--------|--------|--------|
| A0AX07 | 331272 | B5YY96 | 444450 |
| Q09E86 | 378806 | B6EKY8 | 316275 |
| Q08XI8 | 378806 | B6HYZ9 | 409438 |
| Q2VQ12 | 327382 | B6YRU8 | 511995 |
| D3VBI5 | 406817 | B7L4C7 | 585055 |
| D3VB99 | 406817 | B7LWR0 | 585054 |
| D3VJG1 | 406817 | B7M099 | 585034 |
| B4EHM7 | 216591 | B7M9R5 | 585035 |
| D1XGV9 | 647653 | B7N2U1 | 585397 |
| A7GKR8 | 315749 | B7N7M7 | 585056 |
| A7GPK0 | 315749 | B7NHA5 | 585057 |
| C6N0N1 | 658187 | B7UI47 | 574521 |
| C6MZK3 | 658187 | B7VJ35 | 575788 |
| Q5JCL8 | 294    | B8CSE2 | 225849 |
| B1HQ62 | 444177 | B8D798 | 561501 |
| B5STA5 | 443925 | B8D8Z3 | 563178 |
| A9CFI7 | 176299 | B8EB29 | 407976 |
| Q9RAH2 | 76334  | B9IQ92 | 3694   |
| Q9RAH4 | 76334  | B9KBA1 | 309803 |
| A7IZW2 | 329558 | B9SHP2 | 3988   |
| B7IJ64 | 405531 | C0Q4E2 | 476213 |
| B7IVT2 | 405531 | C1A849 | 379066 |
| COLTS3 | 67255  | C3LQD6 | 579112 |
| C4SU96 | 349966 | C3NVN1 | 593588 |
| A4Z4I7 | 59625  | C4K7E7 | 572265 |
| C3AUX9 | 526998 | C4LAP6 | 595494 |
| C3AVQ4 | 526998 | C4X311 | 484021 |
| C3AKA4 | 526998 | C4ZPS9 | 595496 |
| C9ZGA0 | 680198 | C5B7K4 | 634503 |
| B2HPM8 | 216594 | C5X893 | 4558   |
| B2JBV4 | 63737  | C6CJ36 | 561229 |
| B2J682 | 63737  | C6DF19 | 561230 |
| A3I9A7 | 388400 | C6ULA0 | 413997 |
| C6SSJ2 | 511691 | C6UVI7 | 544404 |
| C3H9Z8 | 527030 | C6W787 | 471854 |
| C3HA00 | 527030 | C6XUY7 | 485917 |
| C3H168 | 527030 | C7BJV9 | 553480 |
| C6D408 | 324057 | C7LK98 | 595499 |
| B9X1I0 | 600778 | C7M6I6 | 521097 |
| C2U7I8 | 526981 | C8TGD3 | 573235 |
| C2STM5 | 526976 | C8U177 | 585395 |
| C2SIR2 | 526976 | C8UFX7 | 585396 |
| Q9K5M2 | 46234  | C9XVF4 | 413502 |
| Q9K5M1 | 46234  | D0FPC1 | 79967  |
| C3HSB5 | 527028 | D0J8U6 | 600809 |
| C3AE78 | 526997 | D0JBH0 | 331104 |

|        |        |        |        |
|--------|--------|--------|--------|
| C5RP77 | 573061 | D0KMP5 | 561231 |
| A9VUL4 | 315730 | D0MDV7 | 518766 |
| A9VQN3 | 315730 | D2BX58 | 590409 |
| B9XAW2 | 320771 | D2C644 | 590168 |
| B9XJE5 | 320771 | D2QMT1 | 504472 |
| B9XIK9 | 320771 | D2TGQ2 | 637910 |
| B9X9N1 | 320771 | D2UA20 | 380358 |
| B4W3U5 | 118168 | D3QUG7 | 701177 |
| B4W3U1 | 118168 | D3RCN5 | 640131 |
| Q3M5N4 | 240292 | D3VJK7 | 406817 |
| Q3M1M7 | 240292 | D4G8W9 | 515618 |
| D7DWA7 | 551115 | D4GJL2 | 706191 |
| C2WM97 | 526987 | D4I0J0 | 665029 |
| C3EKM3 | 527023 | D4ZGZ7 | 637905 |
| C2Y3X7 | 526990 | D5B095 | 637386 |
| C2XKD9 | 526989 | D5BBZ2 | 655815 |
| B5UTF6 | 405533 | D5CG97 | 716541 |
| B9TTF3 | 1406   | D5D8Q6 | 641892 |
| B9TTF7 | 1406   | D5ERU4 | 264731 |
| C2NYV7 | 526967 | O81852 | 3702   |
| C4TZF3 | 527012 | P44505 | 727    |
| C3I0Y2 | 527019 | P49079 | 4577   |
| C3FVB0 | 527031 | P49080 | 4577   |
| C3FW25 | 527031 | Q057U6 | 372461 |
| C3DBJ5 | 527025 | Q07Z19 | 318167 |
| C3DAI1 | 527025 | Q0HXE7 | 60481  |
| C2YJP6 | 526991 | Q0T8I6 | 373384 |
| Q5D6C9 | 5016   | Q0TLY7 | 362663 |
| C3DWM3 | 527026 | Q0WJK7 | 632    |
| C3DJP6 | 527026 | Q11YZ9 | 269798 |
| C3DKL0 | 527026 | Q12KK7 | 318161 |
| D5TKP2 | 714359 | Q15PV6 | 342610 |
| C2RNA0 | 526974 | Q1C0L0 | 360102 |
| B7H7R5 | 405532 | Q1CMW7 | 377628 |
| C2T1D0 | 526978 | Q1DA24 | 246197 |
| C2UMF6 | 526982 | Q1DDP1 | 246197 |
| C2R8B3 | 526969 | Q1RGK2 | 364106 |
| A3IP47 | 391612 | Q2NVZ6 | 343509 |
| C3BDU6 | 526999 | Q2P3L5 | 342109 |
| C3E3N5 | 527027 | Q2S4Q2 | 309807 |
| C2N0R0 | 526980 | Q2S5A4 | 309807 |
| C2NB23 | 526980 | Q326M0 | 300268 |
| C2NB24 | 526980 | Q32KB6 | 300267 |
| C2NB42 | 526980 | Q3AUA5 | 340177 |
| B8I982 | 394503 | Q3B1F6 | 319225 |
| B8I5D1 | 394503 | Q3BUG6 | 316273 |

|        |        |        |        |
|--------|--------|--------|--------|
| A6P624 | 1126   | Q3I20  | 326442 |
| D4TRQ6 | 533247 | Q3Z612 | 300269 |
| C3CIZ6 | 527021 | Q47W81 | 167879 |
| C3CVA4 | 527021 | Q4QP95 | 281310 |
| C3CIM3 | 527021 | Q4UU31 | 314565 |
| C3CJJ1 | 527021 | Q57TQ3 | 28901  |
| Q2XP40 | 1423   | Q5E2Y3 | 312309 |
| Q2XP38 | 1423   | Q5LHR8 | 272559 |
| D3V3G3 | 406818 | Q64YR9 | 817    |
| D3V3G2 | 406818 | Q65RV0 | 221988 |
| B4B5I8 | 497965 | Q66ET9 | 633    |
| B4B5I6 | 497965 | Q69LG7 | 39947  |
| B4B5I7 | 497965 | Q6D0A8 | 29471  |
| C3IJN6 | 527020 | Q6LUQ0 | 74109  |
| C3IWG6 | 527020 | Q7MNR5 | 196600 |
| C3IJC7 | 527020 | Q7N8Z6 | 141679 |
| C3IVW9 | 527020 | Q7VQL7 | 203907 |
| C3IK59 | 527020 | Q83MI0 | 623    |
| D3EB42 | 481743 | Q87SD0 | 670    |
| D3EA29 | 481743 | Q89AR4 | 224915 |
| A5A9R5 | 1774   | Q8A541 | 818    |
| A5A9R4 | 1774   | Q8D1W5 | 36870  |
| O68006 | 1402   | Q8DEP2 | 672    |
| O68008 | 1402   | Q8EBT4 | 70863  |
| Q81DB7 | 226900 | Q8FLD9 | 217992 |
| Q81DB4 | 226900 | Q8KAX1 | 1097   |
| Q81DQ0 | 226900 | Q9CPD4 | 747    |
| Q8YTS1 | 103690 | Q9KPK3 | 666    |
| A9FNK4 | 448385 | Q9PBB9 | 2371   |
| A9FNI5 | 448385 | Q9WZ17 | 2336   |
| A9G1U1 | 448385 | A0LY59 | 411154 |
| A9FNH7 | 448385 | A0Y5M3 | 156578 |
| A9EPS4 | 448385 | A1EM59 | 345076 |
| Q110E8 | 203124 | A1FAN1 | 412614 |
| Q4ZQ18 | 205918 | A1ZLX2 | 313606 |
| A6ZL60 | 307796 | A2PCA5 | 412966 |
| Q12572 | 5476   | A2PWB8 | 412883 |
|        |        | A2TPL3 | 313590 |
|        |        | A2TXI3 | 313598 |
|        |        | A2TZS9 | 313598 |
|        |        | A2V048 | 399804 |
|        |        | A2YZH8 | 39946  |
|        |        | A3C5X9 | 39947  |
|        |        | A3H4W8 | 417400 |
|        |        | A3I255 | 388413 |
|        |        | A3J2B4 | 391598 |



|        |        |
|--------|--------|
| A3UWT6 | 314291 |
| A3XKM8 | 398720 |
| A3XM14 | 398720 |
| A3Y0N4 | 314290 |
| A4ATS2 | 313603 |
| A4BWA7 | 313594 |
| A4BY77 | 313594 |
| A4C6Q1 | 87626  |
| A4CPR7 | 313596 |
| A4KQ81 | 412422 |
| A4MYU6 | 374927 |
| A4N5X2 | 375432 |
| A4N5X3 | 375432 |
| A4NBZ4 | 375177 |
| A4NH10 | 374928 |
| A4NN27 | 374932 |
| A4NT79 | 374933 |
| A4POB9 | 375063 |
| A5APD8 | 29760  |
| A5F5S0 | 345073 |
| A5FJU4 | 376686 |
| A5L837 | 391574 |
| A6A3E4 | 417398 |
| A6ABR7 | 417397 |
| A6BV47 | 412420 |
| A6D3N0 | 391591 |
| A6EBG6 | 391596 |
| A6EME0 | 50743  |
| A6EME4 | 50743  |
| A6F9I2 | 58051  |
| A6XUN9 | 404974 |
| A7JGM5 | 430558 |
| A7JKT1 | 442346 |
| A8TAE4 | 314289 |
| A8UJS7 | 391603 |
| A9DAP5 | 314608 |
| A9DJH2 | 391587 |
| A9E3R4 | 391587 |
| A9SKH8 | 145481 |
| A9Z4W1 | 373665 |
| B0A2H5 | 404214 |
| B0GJP4 | 404218 |
| B0GNF9 | 404217 |
| B0H8M8 | 404216 |
| B0HGR7 | 404215 |
| B0HRY0 | 360099 |

|        |        |
|--------|--------|
| B1EMR5 | 502347 |
| B2N0A0 | 344610 |
| B2NW37 | 444451 |
| B2P9V5 | 444452 |
| B2PMC9 | 444453 |
| B2Q6N9 | 471874 |
| B3AA99 | 478004 |
| B3AI54 | 478005 |
| B3BBQ7 | 478008 |
| B3BSW2 | 478007 |
| B3HEK5 | 340184 |
| B3HV43 | 340197 |
| B3IAR0 | 340185 |
| B3IPJ3 | 340186 |
| B3WQQ0 | 344601 |
| B3X452 | 358708 |
| B3XIB2 | 358709 |
| B3YK95 | 439842 |
| B4A3Y8 | 454168 |
| B4AQ93 | 545422 |
| B5BVJ7 | 439846 |
| B5C8C3 | 454165 |
| B5MPN9 | 439847 |
| B5MUW4 | 440534 |
| B5N9Q1 | 454167 |
| B5NM12 | 454231 |
| B5P861 | 454164 |
| B5PKT6 | 465518 |
| B5PVK2 | 465516 |
| B5Q2N5 | 465517 |
| B5Y6I9 | 309798 |
| B6W1M1 | 483217 |
| B6X9Z6 | 520999 |
| B6ZSL9 | 502346 |
| B7RB92 | 443254 |
| B8A1Q6 | 4577   |
| B8B9V9 | 39946  |
| B8K9E0 | 391586 |
| B9G0G2 | 39947  |
| B9G2N4 | 39947  |
| C0AZ70 | 471881 |
| C0AZ71 | 471881 |
| C0AZ72 | 471881 |
| C0AZ73 | 471881 |
| C0BH86 | 487796 |
| C0BMV9 | 487797 |

|        |        |
|--------|--------|
| C0PFV7 | 4577   |
| C0YN60 | 525257 |
| C0YW15 | 525257 |
| C1HPF2 | 469598 |
| C1MCB5 | 469595 |
| C1NBU4 | 457400 |
| C2CAH9 | 592313 |
| C2DN92 | 525281 |
| C2FT78 | 525372 |
| C2HVX8 | 593585 |
| C2I4Z9 | 593586 |
| C2IJB1 | 593589 |
| C2IRU2 | 593590 |
| C2J710 | 417400 |
| C2JFN7 | 593587 |
| C2LNK8 | 525369 |
| C2M454 | 553178 |
| C3Q6K7 | 457395 |
| C3RFB5 | 556260 |
| C3TRR2 | 562    |
| C3TRR5 | 562    |
| C4F0K4 | 521005 |
| C4F6Q0 | 521004 |
| C4H1K4 | 547047 |
| C4HJ88 | 547046 |
| C4RWI4 | 349968 |
| C4SDC5 | 349967 |
| C4SIU2 | 349966 |
| C4T737 | 349965 |
| C4U0P8 | 527012 |
| C4U9H1 | 527002 |
| C4UL16 | 527005 |
| C4UXR4 | 527004 |
| C5PP68 | 525373 |
| C5VKG7 | 553174 |
| C5W226 | 511693 |
| C6EBG7 | 469008 |
| C6I1L5 | 457392 |
| C6IS94 | 469586 |
| C6S2N1 | 661513 |
| C6YG19 | 345072 |
| C6YNG7 | 543737 |
| C6YWY8 | 539329 |
| C6Z5L4 | 457394 |
| C7XEF7 | 563193 |
| C8QA67 | 592316 |

|        |        |
|--------|--------|
| C8TBM1 | 667127 |
| C9LIC7 | 483215 |
| C9MBD5 | 656913 |
| C9MHK5 | 656912 |
| C9NMS3 | 675814 |
| C9P6K7 | 675813 |
| C9P9Y7 | 675811 |
| C9PPY1 | 667128 |
| C9PYZ7 | 619693 |
| C9Q6G9 | 675810 |
| C9QN00 | 675816 |
| C9QSR6 | 536056 |
| C9X5D6 | 568708 |
| D0GQW3 | 675806 |
| D0H513 | 675807 |
| D0HH93 | 675820 |
| D0HSH4 | 675808 |
| D0I1I4 | 675809 |
| D0I847 | 675812 |
| D0ILZ3 | 675815 |
| D0JEH3 | 637382 |
| D0JEH4 | 637382 |
| D0JNL1 | 637385 |
| D0TIL4 | 469589 |
| D0WSM4 | 674977 |
| D0X5M7 | 673519 |
| D0Z019 | 675817 |
| D0ZIQ1 | 588858 |
| D1JRM0 | 469587 |
| D1K0B4 | 457391 |
| D1P6E1 | 500637 |
| D1PFP6 | 537011 |
| D1PV40 | 585502 |
| D1Q570 | 545431 |
| D1QUK8 | 649760 |
| D1RWU7 | 682634 |
| D1TUN5 | 687916 |
| D1VXQ7 | 679189 |
| D1W2I1 | 679190 |
| D1XYV0 | 553171 |
| D2AHN6 | 591020 |
| D2ALT6 | 510831 |
| D2NAV4 | 431946 |
| D2T4D4 | 644651 |
| D2TW52 | 638    |
| D2Y9B8 | 671074 |

|        |        |
|--------|--------|
| D2YMK1 | 671076 |
| D2Z9T1 | 500639 |
| D3H385 | 216592 |
| D3HVV1 | 575611 |
| D3I4C6 | 575612 |
| D3IGI4 | 575615 |
| D4BEY9 | 500640 |
| D4C1L0 | 521000 |
| D4DXE1 | 667129 |
| D4F1Y5 | 500638 |
| D4SSY2 | 427081 |
| D4T3K9 | 427082 |
| D4V870 | 702446 |
| D4WDD5 | 702443 |
| D5BKM1 | 655815 |
| D5CUT5 | 714962 |
| D5H628 | 761659 |
| D5H6Y3 | 761659 |
| D6DT91 | 718254 |
| D6GMS9 | 469608 |
| D6I4Q1 | 550672 |
| D6IHW3 | 550676 |
| D6IJR0 | 656380 |
| D6J6C9 | 550677 |
| D7HED7 | 345074 |
| D7HQ84 | 412967 |
| D7IK30 | 469585 |
| D7IVR4 | 469592 |
| D7J824 | 585544 |
| D7JHG5 | 656379 |
| D7MG88 | 81972  |
| D7N9H5 | 563008 |
| O63067 | 3847   |
| P27725 | 615    |
| P93402 | 4530   |
| Q0HL49 | 60480  |
| Q0WRP9 | 3702   |
| Q0YTN6 | 377431 |
| Q1V779 | 314288 |
| Q1Z189 | 314280 |
| Q1ZCV7 | 314282 |
| Q1ZMJ9 | 314292 |
| Q2C7Y8 | 121723 |
| Q3R3T0 | 155920 |
| Q3R9F6 | 155920 |
| Q3RIE3 | 155919 |

|        |        |
|--------|--------|
| Q6ZD09 | 39947  |
| Q6ZD10 | 39947  |
| Q74Q04 | 632    |
| Q87C23 | 183190 |
| Q8CZP2 | 632    |
| Q8RMX0 | 562    |

**aspartate kinase**

| UniProt | TXID   |
|---------|--------|
| A0AHX6  | 386043 |
| A0AIN9  | 386043 |
| A0AL59  | 386043 |
| A0B8K8  | 349307 |
| A0JSD1  | 290399 |
| A0K8J8  | 331272 |
| A0KLC9  | 380703 |
| A0KPG0  | 380703 |
| A0KSX1  | 94122  |
| A0KU95  | 94122  |
| A0L691  | 156889 |
| A0LKA3  | 335543 |
| A0LWH4  | 351607 |
| A0M1M8  | 411154 |
| A0M761  | 411154 |
| A0NKI3  | 379360 |
| A0NNX3  | 384765 |
| A0PVE4  | 362242 |
| A0Q0P9  | 386415 |
| A0Q239  | 386415 |
| A0Q8L7  | 401614 |
| A0Q9U0  | 243243 |
| A0R5N8  | 246196 |
| A0RCH9  | 412694 |
| A0RHH1  | 412694 |
| A0RPZ1  | 360106 |
| A0RXH8  | 46770  |
| A0Y5U6  | 156578 |
| A0YHT2  | 247633 |
| A0YJJ7  | 313612 |
| A0YY20  | 313612 |
| A0Z876  | 247639 |
| A0ZDZ8  | 313624 |
| A0ZZN7  | 367928 |
| A0ZZN8  | 367928 |
| A1AIK2  | 405955 |

**aspartate kinase**

| UniProt | TXID   |
|---------|--------|
| P10869  | 4932   |
| D3DLV4  | 559292 |
| C7GSK1  | 574961 |
| C8Z756  | 643680 |
| B3LS65  | 285006 |
| A6ZR03  | 307796 |
| Q6FPL5  | 5478   |
| A7TNL6  | 436907 |
| C5DWQ0  | 559307 |
| C5DBN1  | 559295 |
| Q6CID1  | 28985  |
| Q75AL3  | 33169  |
| Q6BUX0  | 4959   |
| A3GF89  | 4924   |
| C4Y8G7  | 306902 |
| C5MDW1  | 294747 |
| A5DQ27  | 4929   |
| B9WGK6  | 573826 |
| Q5A474  | 5476   |
| C4YGT6  | 5476   |
| Q59ME9  | 5476   |
| C4R700  | 644223 |
| A5E7Q4  | 36914  |
| O60163  | 4896   |
| A1C9Q1  | 5057   |
| Q5AS71  | 162425 |
| C8V9C0  | 227321 |
| C5P7Y6  | 222929 |
| C4JMH7  | 336963 |
| C1GF52  | 502780 |
| B6JWV6  | 402676 |
| Q0CA14  | 341663 |
| A2R9Q7  | 425011 |
| Q2UTJ9  | 5062   |
| C5FIE4  | 554155 |
| B6HG11  | 500485 |

**aspartate-semialdehyde dehydrogenase**

| UniProt | TXID   |
|---------|--------|
| A1CJF2  | 5057   |
| A1D827  | 331117 |
| A2QXM6  | 425011 |
| A3LUL1  | 4924   |
| A4RAZ2  | 148305 |
| A4RR15  | 436017 |
| A5AHX9  | 29760  |
| A5DBS5  | 4929   |
| A5DTR6  | 36914  |
| A6QXL7  | 339724 |
| A6SS50  | 332648 |
| A6ZYB6  | 307796 |
| A7F6D3  | 665079 |
| A7TTV1  | 436907 |
| A8J173  | 3055   |
| A8P6J3  | 240176 |
| A8QAI1  | 425265 |
| A9TM50  | 145481 |
| A9V5G9  | 81824  |
| B0CZF4  | 486041 |
| B0XYV5  | 451804 |
| B1X4K9  | 39717  |
| B2AT83  | 5145   |
| B2WBK5  | 426418 |
| B3LGC6  | 285006 |
| B4F8G4  | 4577   |
| B5VG51  | 545124 |
| B6HF52  | 500485 |
| B6JV33  | 402676 |
| B6KIC8  | 508771 |
| B6Q SX9 | 441960 |
| B6TWW1  | 4577   |
| B8AK88  | 39946  |
| B8MMS3  | 441959 |
| B8MN42  | 441959 |
| B8NUP8  | 332952 |

|         |        |        |        |        |        |
|---------|--------|--------|--------|--------|--------|
| A1AR99  | 338966 | Q6C9F1 | 4952   | B9F5U0 | 39947  |
| A1AWM9  | 413404 | B6QGS4 | 441960 | B9HJH4 | 3694   |
| A1B0C9  | 318586 | B8MBY8 | 441959 | B9HVU3 | 3694   |
| A1BJJ4  | 290317 | C5JYP2 | 559298 | B9P5X5 | 3694   |
| A1C9Q1  | 5057   | C5GM03 | 559297 | B9QF78 | 432359 |
| A1CZK2  | 331117 | Q4WTP2 | 5085   | B9T4M3 | 3988   |
| A1ELH7  | 345076 | B0Y369 | 451804 | B9WAT0 | 573826 |
| A1F694  | 412614 | D4AXF4 | 663331 | C0NEA4 | 447093 |
| A1F7V9  | 412614 | A1CZK2 | 331117 | C0SI01 | 482561 |
| A1HRY3  | 401526 | D4DL49 | 663202 | C1FDY1 | 296587 |
| A1HSD1  | 401526 | B8NSE7 | 332952 | C1GLY5 | 502780 |
| A1JRW0  | 393305 | Q0UFQ9 | 13684  | C1HBC4 | 502779 |
| A1KA76  | 62928  | C0NE81 | 447093 | C1MKQ2 | 564608 |
| A1KQ41  | 410289 | A6R0E4 | 339724 | C4JN68 | 336963 |
| A1KUT8  | 272831 | B2VS61 | 426418 | C4R4N4 | 644223 |
| A1R2K3  | 290340 | B0DWL9 | 486041 | C4XW14 | 306902 |
| A1RHG6  | 351745 | Q8NIW0 | 5141   | C4YJJ0 | 5476   |
| A1RNQ8  | 351745 | A6S199 | 332648 | C5DMV0 | 559295 |
| A1RR70  | 384616 | Q2GXM2 | 38033  | C5DYK4 | 559307 |
| A1S355  | 326297 | A7E5J9 | 665079 | C5FPC3 | 554155 |
| A1S4F0  | 326297 | D1ZV99 | 5147   | C5GC63 | 559297 |
| A1SDI0  | 196162 | C7YTI1 | 660122 | C5JN67 | 559298 |
| A1T000  | 357804 | A4R1N1 | 148305 | C5M6A4 | 294747 |
| A1TGH0  | 350058 | B8P2F0 | 561896 | C5PIU4 | 222929 |
| A1TPL2  | 397945 | Q55N96 | 5207   | C5X054 | 4558   |
| A1TWY7  | 351348 | Q5KBM8 | 5207   | C6HN59 | 544712 |
| A1TZ93  | 351348 | Q4PG91 | 5270   | C7GX38 | 574961 |
| A1UMV9  | 189918 | A8QDH2 | 425265 | C7YLT4 | 660122 |
| A1URT6  | 360095 | A8P5G4 | 240176 | C7YWU0 | 660122 |
| A1V5G3  | 320388 | A8PCQ5 | 240176 | C8VAM5 | 227321 |
| A1VCV4  | 391774 | C9SG47 | 526221 | C8Z573 | 643680 |
| A1VRB0  | 365044 | C1H9E9 | 502779 | C9SC07 | 526221 |
| A1VYU2  | 354242 | C6HG88 | 544712 | D0MXD8 | 403677 |
| A1W6E5  | 232721 | A9UQW7 | 81824  | D1Z4H6 | 5147   |
| A1WSM0  | 391735 | C0SD16 | 482561 | D3B6X7 | 670386 |
| A1W XK4 | 349124 | B7G5H9 | 556484 | D4AM80 | 663331 |
| A1ZLK8  | 313606 | B8C772 | 35128  | D4DGR6 | 663202 |
| A2BN07  | 415426 | A8I0V1 | 3055   | D5A9F9 | 3332   |
| A2BTM9  | 146891 | Q6YS33 | 39947  | D5GMF0 | 39416  |
| A2BZ34  | 167542 | Q6YS32 | 39947  | D6VSD8 | 559292 |
| A2C5B2  | 167555 | B9EW03 | 39947  | D7KCK0 | 81972  |
| A2C5S9  | 59922  | A9TQ86 | 145481 | P13663 | 4932   |
| A2P9B5  | 412966 | A9T456 | 145481 | P78780 | 4896   |
| A2P9X5  | 412966 | B4FA80 | 4577   | Q01GI9 | 70448  |
| A2PTS2  | 412883 | C4IZ68 | 4577   | Q0CC47 | 341663 |
| A2PV45  | 412883 | A3RL74 | 4577   | Q0V6X4 | 13684  |

|         |        |        |        |        |        |
|---------|--------|--------|--------|--------|--------|
| A2Q1Y6  | 3880   | D7M5Z6 | 81972  | Q2H525 | 38033  |
| A2R9Q7  | 425011 | D7L9I8 | 81972  | Q2KF40 | 242507 |
| A2RM64  | 416870 | D7M587 | 81972  | Q2U4J7 | 5062   |
| A2SAY3  | 412022 | Q9LYU8 | 3702   | Q4P4R4 | 5270   |
| A2SIL8  | 420662 | Q9S702 | 3702   | Q4WWR8 | 5085   |
| A2SPR3  | 410358 | O23653 | 3702   | Q560L0 | 5207   |
| A2TRG8  | 313590 | B9Q868 | 432359 | Q5ALM0 | 5476   |
| A2TUZ9  | 313590 | B9PMV9 | 5811   | Q5B3T7 | 162425 |
| A2TYX2  | 313598 | B6KET9 | 508771 | Q5KPK7 | 5207   |
| A2UWR4  | 399804 | C5WSV9 | 4558   | Q6BS59 | 4959   |
| A2UZ62  | 399804 | C5XH02 | 4558   | Q6C968 | 4952   |
| A2VM92  | 348776 | C5X492 | 4558   | Q6CQJ0 | 28985  |
| A2VX76  | 350702 | A9NUI1 | 3332   | Q6FVK7 | 5478   |
| A2W955  | 350701 | B8A8I6 | 39946  | Q750W4 | 33169  |
| A3CQ63  | 388919 | B8ANP4 | 39946  | Q7SF95 | 5141   |
| A3CS06  | 368407 | D7FGV8 | 2880   | Q8VYI4 | 3702   |
| A3D0Q0  | 325240 | Q9XHC5 | 3847   | Q93Y73 | 39947  |
| A3D782  | 325240 | B9RGY9 | 3988   | Q99103 | 5270   |
| A3DF78  | 203119 | C1FDY8 | 296587 | Q9LQU9 | 3702   |
| A3EL14  | 345075 | D0NKQ0 | 403677 |        |        |
| A3ENB0  | 345075 | D0NN44 | 403677 |        |        |
| A3EV90  | 419542 | A4RQT3 | 436017 |        |        |
| A3GF89  | 4924   | B7ZYQ0 | 4577   |        |        |
| A3GMZ4  | 417399 | Q5JK18 | 39947  |        |        |
| A3GZD2  | 417400 | A2Q1Y6 | 3880   |        |        |
| A3H4N9  | 417400 | B1X4L4 | 39717  |        |        |
| A3HVVH3 | 388413 | B7ZZJ1 | 4577   |        |        |
| A3ICN2  | 388400 | B8AKZ6 | 39946  |        |        |
| A3IKB3  | 391612 | B8ANP3 | 39946  |        |        |
| A3J2M8  | 391598 | B9F9Y5 | 39947  |        |        |
| A3JB05  | 270374 | B9H1N5 | 3694   |        |        |
| A3JGQ4  | 270374 | B9NDG6 | 3694   |        |        |
| A3JR41  | 388401 | C0PTM7 | 3332   |        |        |
| A3K071  | 388399 | C4J2N3 | 4577   |        |        |
| A3K8R5  | 388399 | Q10AJ5 | 39947  |        |        |
| A3KLD2  | 1390   | Q851Z6 | 39947  |        |        |
| A3L5G7  | 350704 | Q852E4 | 39947  |        |        |
| A3LMF0  | 350703 |        |        |        |        |
| A3M3S8  | 400667 |        |        |        |        |
| A3ML38  | 320389 |        |        |        |        |
| A3MT45  | 410359 |        |        |        |        |
| A3N074  | 416269 |        |        |        |        |
| A3NB45  | 320373 |        |        |        |        |
| A3NWX3  | 357348 |        |        |        |        |
| A3PFD6  | 167546 |        |        |        |        |
| A3PGZ8  | 349101 |        |        |        |        |



|        |        |
|--------|--------|
| A3Q793 | 164757 |
| A3QB03 | 323850 |
| A3RL74 | 4577   |
| A3RW41 | 342110 |
| A3S7C9 | 52598  |
| A3SHR7 | 89187  |
| A3SJD3 | 89187  |
| A3SS91 | 314267 |
| A3TI68 | 313589 |
| A3TST3 | 252305 |
| A3TZ70 | 252305 |
| A3U5N4 | 216432 |
| A3UGH9 | 314254 |
| A3UHE7 | 314254 |
| A3UV44 | 314291 |
| A3UZX6 | 314291 |
| A3V784 | 314232 |
| A3VAQ5 | 314271 |
| A3VFP4 | 314271 |
| A3VUX3 | 314260 |
| A3W4E5 | 314264 |
| A3W8G6 | 314264 |
| A3WF70 | 237727 |
| A3WKY2 | 314276 |
| A3WR07 | 314253 |
| A3X4H9 | 314262 |
| A3XH83 | 398720 |
| A3XHB5 | 398720 |
| A3XSQ5 | 314290 |
| A3XXN2 | 314290 |
| A3Y1V9 | 314290 |
| A3YL18 | 360111 |
| A3YRL8 | 360108 |
| A3YWN5 | 69042  |
| A3Z426 | 221360 |
| A3ZDM7 | 360112 |
| A3ZIQ7 | 360110 |
| A4A2N2 | 314230 |
| A4ACW7 | 314285 |
| A4AKA7 | 312284 |
| A4AN99 | 313603 |
| A4BA98 | 314283 |
| A4BCJ3 | 314283 |
| A4BKP3 | 314283 |
| A4BU40 | 314278 |
| A4BWM5 | 313594 |

|        |        |
|--------|--------|
| A4CCF9 | 87626  |
| A4CFG7 | 87626  |
| A4CH35 | 313596 |
| A4CYH4 | 59931  |
| A4E939 | 411903 |
| A4EED8 | 391593 |
| A4EY38 | 388739 |
| A4F6F7 | 405948 |
| A4FXG2 | 402880 |
| A4G4M6 | 204773 |
| A4IMF0 | 420246 |
| A4IT05 | 420246 |
| A4J3P8 | 349161 |
| A4J5V6 | 349161 |
| A4JFC6 | 269482 |
| A4KMH7 | 395095 |
| A4LD52 | 425067 |
| A4NFS3 | 374928 |
| A4QAP5 | 340322 |
| A4R1N1 | 148305 |
| A4RQT3 | 436017 |
| A4SGV3 | 290318 |
| A4SNY2 | 382245 |
| A4SSA0 | 382245 |
| A4SX66 | 312153 |
| A4T601 | 350054 |
| A4TH38 | 386656 |
| A4TYG9 | 55518  |
| A4Vfy3 | 379731 |
| A4VJB4 | 379731 |
| A4VXD8 | 391295 |
| A4W3N4 | 391296 |
| A4W5D9 | 399742 |
| A4WJH1 | 340102 |
| A4WQ78 | 349102 |
| A4X1G1 | 369723 |
| A4XI70 | 351627 |
| A4XJT8 | 351627 |
| A4XWE1 | 399739 |
| A4Y377 | 319224 |
| A4Y930 | 319224 |
| A4YHF2 | 399549 |
| A4YKT4 | 114615 |
| A5CEL9 | 357244 |
| A5CPE1 | 443906 |
| A5CWK6 | 412965 |

|        |        |
|--------|--------|
| A5D1T6 | 370438 |
| A5D2Q4 | 370438 |
| A5DQ27 | 4929   |
| A5E7Q4 | 36914  |
| A5ETF5 | 288000 |
| A5EWA4 | 246195 |
| A5F0I0 | 345073 |
| A5F8T6 | 345073 |
| A5F9B9 | 345073 |
| A5FMJ7 | 376686 |
| A5FPB7 | 216389 |
| A5FX93 | 349163 |
| A5G2X0 | 349163 |
| A5G3X9 | 351605 |
| A5GHU2 | 32051  |
| A5GQ19 | 316278 |
| A5I2B0 | 441771 |
| A5I4I4 | 441771 |
| A5I761 | 441771 |
| A5ICW8 | 400673 |
| A5IM65 | 390874 |
| A5ISK9 | 359786 |
| A5ISS5 | 359786 |
| A5KFB7 | 398000 |
| A5KLH8 | 411460 |
| A5L289 | 391574 |
| A5L311 | 391574 |
| A5L9Y3 | 406556 |
| A5LJX9 | 406557 |
| A5LVH5 | 406558 |
| A5LYY5 | 406559 |
| A5M9Y2 | 406560 |
| A5MJ05 | 406561 |
| A5MNX4 | 406562 |
| A5MX81 | 406563 |
| A5N5T0 | 431943 |
| A5N851 | 431943 |
| A5P8N4 | 161528 |
| A5TJV1 | 370895 |
| A5U935 | 419947 |
| A5ULF9 | 420247 |
| A5UW3  | 357808 |
| A5UXT9 | 357808 |
| A5VEX5 | 392499 |
| A5VJ54 | 557436 |
| A5VSK2 | 444178 |

|        |        |
|--------|--------|
| A5W0E0 | 351746 |
| A5WFW2 | 349106 |
| A5WTS7 | 336982 |
| A5XH62 | 334802 |
| A5XYL4 | 334803 |
| A5Z523 | 411463 |
| A5ZHY7 | 411901 |
| A5ZN67 | 411459 |
| A5ZX96 | 411459 |
| A6A2L1 | 417398 |
| A6A6C7 | 417398 |
| A6A7C1 | 417398 |
| A6AD32 | 417397 |
| A6AFJ3 | 417397 |
| A6ARL0 | 410291 |
| A6AW08 | 410291 |
| A6AXY6 | 419109 |
| A6BE05 | 411462 |
| A6BHP7 | 411462 |
| A6BXE9 | 412420 |
| A6CCL9 | 344747 |
| A6CQ71 | 161544 |
| A6CSE9 | 161544 |
| A6D492 | 391591 |
| A6DC58 | 391592 |
| A6DZ35 | 391613 |
| A6E4Q6 | 391613 |
| A6EJC9 | 391596 |
| A6EJX7 | 391596 |
| A6ELU0 | 50743  |
| A6F3M2 | 443152 |
| A6F5K2 | 443152 |
| A6FG66 | 58051  |
| A6FTB0 | 351016 |
| A6FVL0 | 351016 |
| A6FXK7 | 391625 |
| A6GNX5 | 391597 |
| A6GWE2 | 402612 |
| A6H562 | 1718   |
| A6L6Z5 | 435590 |
| A6LDJ0 | 435591 |
| A6LIV2 | 435591 |
| A6LKZ7 | 391009 |
| A6LP61 | 391009 |
| A6LSR3 | 290402 |
| A6M137 | 290402 |

|        |        |
|--------|--------|
| A6P129 | 411467 |
| A6Q440 | 387092 |
| A6Q7F7 | 387093 |
| A6QGM9 | 426430 |
| A6QGU4 | 426430 |
| A6R0E4 | 339724 |
| A6S199 | 332648 |
| A6SZU7 | 375286 |
| A6TGT3 | 272620 |
| A6TLT7 | 293826 |
| A6TT14 | 293826 |
| A6TTL7 | 293826 |
| A6U1E7 | 359787 |
| A6U1L4 | 359787 |
| A6UCF4 | 366394 |
| A6UP33 | 406327 |
| A6UUT8 | 419665 |
| A6VA70 | 381754 |
| A6V3V3 | 426368 |
| A6VMU6 | 339671 |
| A6VUG2 | 400668 |
| A6W1F0 | 400668 |
| A6W564 | 266940 |
| A6WR15 | 402882 |
| A6WSQ2 | 402882 |
| A6WXQ1 | 439375 |
| A6XQC5 | 404974 |
| A6XXZ2 | 404974 |
| A6Y3J9 | 345074 |
| A6Y6F5 | 345074 |
| A6ZR03 | 307796 |
| A7A3F1 | 411481 |
| A7A3F2 | 411481 |
| A7AJF1 | 411477 |
| A7ALK7 | 411477 |
| A7B7L2 | 411470 |
| A7BA97 | 411466 |
| A7C2B7 | 422289 |
| A7E5J9 | 665079 |
| A7FDG7 | 349747 |
| A7FUE6 | 441770 |
| A7FVY4 | 441770 |
| A7FYT3 | 441770 |
| A7GDW7 | 441772 |
| A7GFZ7 | 441772 |
| A7GIS3 | 441772 |

|        |        |
|--------|--------|
| A7GNP1 | 315749 |
| A7GRD0 | 315749 |
| A7GXR9 | 360105 |
| A7H3U8 | 360109 |
| A7HBV8 | 404589 |
| A7HGP3 | 404589 |
| A7HJ59 | 381764 |
| A7HMJ6 | 381764 |
| A7HTX9 | 402881 |
| A7I219 | 360107 |
| A7I4F0 | 456442 |
| A7IIM4 | 78245  |
| A7JF59 | 430558 |
| A7JP25 | 442346 |
| A7JRW3 | 272629 |
| A7K083 | 150340 |
| A7K2W3 | 150340 |
| A7LQZ3 | 411476 |
| A7MPC0 | 290339 |
| A7MU63 | 338187 |
| A7MVY6 | 338187 |
| A7MYT4 | 338187 |
| A7NNC9 | 383372 |
| A7NNU7 | 383372 |
| A7TNL6 | 436907 |
| A7UXV0 | 411479 |
| A7V9W7 | 411479 |
| A7VEN4 | 411489 |
| A7VVX2 | 428125 |
| A7X1X8 | 418127 |
| A7X268 | 418127 |
| A7Z1C7 | 326423 |
| A7Z4U7 | 326423 |
| A7Z7D6 | 326423 |
| A7ZEE3 | 360104 |
| A7ZUP2 | 331111 |
| A8A7C3 | 331112 |
| A8A8Y1 | 453591 |
| A8ANA7 | 290338 |
| A8EC50 | 360118 |
| A8EU35 | 367737 |
| A8EZV3 | 293613 |
| A8F2N8 | 416276 |
| A8F563 | 416591 |
| A8F6Y7 | 416591 |
| A8F9Y4 | 315750 |

|        |        |
|--------|--------|
| A8FDE5 | 315750 |
| A8FG00 | 315750 |
| A8FL06 | 407148 |
| A8FRF5 | 425104 |
| A8G7F3 | 93060  |
| A8GKD3 | 399741 |
| A8GPP7 | 293614 |
| A8GTK8 | 392021 |
| A8GYB2 | 391896 |
| A8H0H5 | 398579 |
| A8HYR1 | 438753 |
| A8I0V1 | 3055   |
| A8KVV7 | 331978 |
| A8KYC0 | 298653 |
| A8LPU4 | 398580 |
| A8LYI6 | 391037 |
| A8M9I2 | 397948 |
| A8MLJ3 | 350688 |
| A8P5G4 | 240176 |
| A8PCQ5 | 240176 |
| A8QDH2 | 425265 |
| A8RFV4 | 428127 |
| A8RKF7 | 411902 |
| A8RPC8 | 411902 |
| A8SAP6 | 411485 |
| A8SVF6 | 411474 |
| A8SWN4 | 411474 |
| A8T920 | 314289 |
| A8T9C1 | 314289 |
| A8TN89 | 331869 |
| A8U5B0 | 333990 |
| A8U8Z2 | 333990 |
| A8UF44 | 391603 |
| A8UQW2 | 392423 |
| A8YNK2 | 267872 |
| A8YUS9 | 405566 |
| A8Z209 | 451516 |
| A8Z3X1 | 451516 |
| A8Z5R6 | 444179 |
| A8ZVC2 | 96561  |
| A8ZWG1 | 96561  |
| A9A2X3 | 436308 |
| A9AAT1 | 444158 |
| A9AHP0 | 395019 |
| A9AZT6 | 316274 |
| A9BD92 | 93059  |

|        |        |
|--------|--------|
| A9BHR5 | 403833 |
| A9BZ49 | 398578 |
| A9CG68 | 176299 |
| A9CV01 | 314608 |
| A9D7Q9 | 411684 |
| A9DLD8 | 391587 |
| A9DXS7 | 391624 |
| A9E1D4 | 391624 |
| A9EKH3 | 383629 |
| A9G265 | 391619 |
| A9G6H5 | 448385 |
| A9GE28 | 448385 |
| A9GH52 | 448385 |
| A9HBT2 | 391595 |
| A9HJ44 | 272568 |
| A9HXJ3 | 340100 |
| A9IQF8 | 382640 |
| A9K9D9 | 412021 |
| A9KG29 | 434922 |
| A9KIT6 | 357809 |
| A9KKY1 | 357809 |
| A9KYF7 | 399599 |
| A9L371 | 399599 |
| A9M0T4 | 374833 |
| A9M8K7 | 483179 |
| A9N1J4 | 272994 |
| A9NCN8 | 360115 |
| A9NGC4 | 441768 |
| A9NUII | 3332   |
| A9R537 | 349746 |
| A9T456 | 145481 |
| A9TQ86 | 145481 |
| A9UQW7 | 81824  |
| A9VPK3 | 315730 |
| A9VS42 | 315730 |
| A9W1A7 | 419610 |
| A9WE20 | 324602 |
| A9WV49 | 288705 |
| A9ZDY0 | 373665 |
| A9ZH60 | 360117 |
| B0A466 | 404214 |
| B0AAJ7 | 445973 |
| B0AC61 | 445973 |
| B0AMV6 | 486624 |
| B0AWN3 | 486624 |
| B0B7T1 | 471472 |



|        |        |
|--------|--------|
| BOBBZ6 | 471473 |
| B0BV45 | 452659 |
| B0CFC7 | 329726 |
| B0CIC5 | 470137 |
| B0DWL9 | 486041 |
| B0G375 | 411461 |
| B0G5N1 | 411461 |
| B0GIZ4 | 404218 |
| B0GSQ6 | 404217 |
| B0HB27 | 404216 |
| B0HKQ7 | 404215 |
| B0I0J0 | 360099 |
| B0JW35 | 449447 |
| B0K1C5 | 399726 |
| B0K9N9 | 340099 |
| B0KR42 | 76869  |
| B0MH07 | 411490 |
| B0MQZ2 | 428128 |
| B0N3M5 | 445974 |
| B0NAL0 | 411468 |
| B0NJL0 | 411468 |
| B0NL25 | 449673 |
| B0NLI1 | 449673 |
| B0P2P4 | 411484 |
| B0PHG2 | 445972 |
| B0Q157 | 486619 |
| B0Q4A0 | 486619 |
| B0QFI6 | 486621 |
| B0QN02 | 486621 |
| B0R7Q7 | 478009 |
| B0RIH0 | 31964  |
| B0S3W1 | 334413 |
| B0SA46 | 355278 |
| B0SK85 | 456481 |
| B0SW83 | 366602 |
| B0TFR7 | 498761 |
| B0THT1 | 498761 |
| B0TTM0 | 458817 |
| B0TWJ2 | 484022 |
| B0UAV2 | 426117 |
| B0VAI4 | 509173 |
| B0VL28 | 509170 |
| B0Y369 | 451804 |
| B1BA09 | 445337 |
| B1BG33 | 445334 |
| B1BWW7 | 451755 |

|        |        |
|--------|--------|
| B1BZW6 | 428126 |
| B1EQI2 | 502347 |
| B1EZ82 | 486623 |
| B1F0J1 | 486623 |
| B1FKJ7 | 396596 |
| B1G6I2 | 396598 |
| B1GG61 | 486620 |
| B1GKS8 | 486620 |
| B1GYX2 | 471821 |
| B1HKT6 | 320374 |
| B1HW85 | 444177 |
| B1HX07 | 444177 |
| B1I3M6 | 477974 |
| B1I9K7 | 487214 |
| B1IFH4 | 498213 |
| B1II40 | 498213 |
| B1ILR1 | 498213 |
| B1IUM8 | 481805 |
| B1JCG8 | 390235 |
| B1JJM6 | 502800 |
| B1JUK4 | 406425 |
| B1KEK8 | 392500 |
| B1KS26 | 498214 |
| B1KWJ8 | 498214 |
| B1L217 | 498214 |
| B1L7E2 | 374847 |
| B1L7R4 | 374847 |
| B1LBQ8 | 126740 |
| B1LPI8 | 439855 |
| B1M764 | 426355 |
| B1MFP2 | 561007 |
| B1MYF1 | 349519 |
| B1Q9P6 | 445335 |
| B1QD88 | 445335 |
| B1QED8 | 445335 |
| B1QI19 | 445336 |
| B1QQ19 | 445336 |
| B1QQA6 | 445336 |
| B1QUX2 | 447214 |
| B1QXV2 | 447214 |
| B1RAI4 | 451754 |
| B1RIJ0 | 451756 |
| B1RQ46 | 451757 |
| B1RYZ5 | 453362 |
| B1S7G7 | 473819 |
| B1S7G8 | 473819 |

|        |        |
|--------|--------|
| B1SBX6 | 471872 |
| B1T5V9 | 396597 |
| B1UM92 | 486622 |
| B1UR09 | 486622 |
| B1V5N7 | 488537 |
| B1VI49 | 504474 |
| B1VM91 | 455632 |
| B1WUK6 | 43989  |
| B1X4L4 | 39717  |
| B1XC23 | 316385 |
| B1XL09 | 32049  |
| B1XUY4 | 452638 |
| B1XY40 | 395495 |
| B1YBF5 | 444157 |
| B1YJ37 | 262543 |
| B1YSM4 | 398577 |
| B1Z916 | 441620 |
| B1ZVC9 | 452637 |
| B2A3B1 | 457570 |
| B2DG78 | 453361 |
| B2DLU1 | 453363 |
| B2DRR0 | 453364 |
| B2E1H5 | 453365 |
| B2E7A0 | 453366 |
| B2EAZ6 | 486409 |
| B2EAZ7 | 486409 |
| B2G6M5 | 557433 |
| B2GC07 | 334390 |
| B2GFE8 | 378753 |
| B2H9W6 | 331109 |
| B2HKD0 | 216594 |
| B2HWK6 | 405416 |
| B2IHL9 | 395963 |
| B2ILV9 | 516950 |
| B2IWV0 | 63737  |
| B2JIR7 | 391038 |
| B2K4Y7 | 502801 |
| B2KAQ6 | 445932 |
| B2N308 | 344610 |
| B2NQI0 | 444451 |
| B2P9L0 | 444452 |
| B2PJ63 | 444453 |
| B2Q557 | 471874 |
| B2RGX0 | 431947 |
| B2S827 | 430066 |
| B2SXP5 | 398527 |

|        |        |
|--------|--------|
| B2TJ64 | 508765 |
| B2TN16 | 508765 |
| B2TX49 | 344609 |
| B2U9Q2 | 402626 |
| B2UNR2 | 349741 |
| B2UUZ1 | 512562 |
| B2V362 | 508767 |
| B2V4H8 | 508767 |
| B2V9P0 | 436114 |
| B2VKB2 | 338565 |
| B2VS61 | 426418 |
| B3A628 | 478004 |
| B3AH24 | 478005 |
| B3AZW5 | 478006 |
| B3BBY1 | 478008 |
| B3BTU6 | 478007 |
| B3C6K3 | 471870 |
| B3CB82 | 471870 |
| B3CM91 | 570417 |
| B3CRW7 | 334380 |
| B3DUB0 | 205913 |
| B3DUB1 | 205913 |
| B3DZ52 | 481448 |
| B3E389 | 398767 |
| B3E698 | 398767 |
| B3EI31 | 290315 |
| B3EPV0 | 331678 |
| B3ERE0 | 452471 |
| B3GXE5 | 537457 |
| B3HEP7 | 340184 |
| B3HRP9 | 340197 |
| B3I357 | 340185 |
| B3IGL5 | 340186 |
| B3J3Z5 | 405536 |
| B3JAA7 | 405536 |
| B3JMK1 | 470145 |
| B3LS65 | 285006 |
| B3PCZ7 | 498211 |
| B3PP82 | 491916 |
| B3QCF4 | 395960 |
| B3QLQ6 | 517417 |
| B3QZB7 | 517418 |
| B3R4D5 | 164546 |
| B3T3S9 | 455570 |
| B3TAR4 | 455605 |
| B3W7E9 | 543734 |

|        |        |
|--------|--------|
| B3W9N2 | 543734 |
| B3WJ86 | 344601 |
| B3WYM4 | 358708 |
| B3XCA1 | 358709 |
| B3XRK1 | 349123 |
| B3YH84 | 439842 |
| B3YRS1 | 405917 |
| B3YTW9 | 405917 |
| B3Z5U1 | 451707 |
| B3ZDS3 | 451707 |
| B3ZMW0 | 451709 |
| B3ZPL9 | 451709 |
| B4A9S5 | 454168 |
| B4ADT4 | 536229 |
| B4AIT7 | 536229 |
| B4AM64 | 536229 |
| B4ARI9 | 545422 |
| B4AVB2 | 497965 |
| B4BIY5 | 495036 |
| B4BNE7 | 495036 |
| B4CYH0 | 497964 |
| B4ED69 | 216591 |
| B4EYR9 | 529507 |
| B4FA80 | 4577   |
| B4R983 | 450851 |
| B4RGD1 | 450851 |
| B4RL30 | 521006 |
| B4RXP4 | 314275 |
| B4S677 | 290512 |
| B4SGX9 | 324925 |
| B4T1R4 | 423368 |
| B4TDK3 | 454169 |
| B4TQN7 | 439843 |
| B4U547 | 552526 |
| B4U8L3 | 380749 |
| B4UC42 | 447217 |
| B4UD69 | 447217 |
| B4VBV4 | 465541 |
| B4VQZ0 | 118168 |
| B4W759 | 391600 |
| B4WSH8 | 91464  |
| B4X4V9 | 236097 |
| B5BJU3 | 554290 |
| B5BVW1 | 439846 |
| B5CLV9 | 471875 |
| B5CZK5 | 484018 |

|        |        |
|--------|--------|
| B5E7F4 | 512566 |
| B5EI19 | 404380 |
| B5EME6 | 380394 |
| B5EVR3 | 388396 |
| B5F1N9 | 454166 |
| B5FAD2 | 388396 |
| B5FGL5 | 388396 |
| B5FQP4 | 439851 |
| B5GJ96 | 465543 |
| B5H3B4 | 443255 |
| B5HA41 | 457429 |
| B5HKD1 | 457429 |
| B5HVP8 | 463191 |
| B5ITZ0 | 391623 |
| B5IXZ5 | 391626 |
| B5JEX7 | 382464 |
| B5JV97 | 391615 |
| B5K6K3 | 391616 |
| B5MQJ9 | 439847 |
| B5MYF8 | 440534 |
| B5N7P8 | 454167 |
| B5NPR7 | 454231 |
| B5P649 | 454164 |
| B5PIY7 | 465518 |
| B5PYA3 | 465516 |
| B5Q4N1 | 465517 |
| B5QF05 | 478547 |
| B5QKT0 | 486408 |
| B5QQ69 | 486408 |
| B5QYI3 | 550537 |
| B5R7R9 | 550538 |
| B5RZM6 | 305    |
| B5SM42 | 564066 |
| B5UR66 | 405533 |
| B5UWV7 | 405533 |
| B5V3G4 | 451708 |
| B5VCI3 | 451708 |
| B5W4M6 | 513049 |
| B5WJ98 | 516466 |
| B5XY04 | 507522 |
| B5Y6I9 | 309798 |
| B5YEX6 | 309799 |
| B5YGC1 | 289376 |
| B5Z0C3 | 444450 |
| B5Z8M4 | 563041 |
| B5ZJZ3 | 272568 |

|        |        |
|--------|--------|
| B5ZRR6 | 395492 |
| B6ANX7 | 419541 |
| B6B1B3 | 314270 |
| B6B8G8 | 439496 |
| B6BIN7 | 439483 |
| B6BWK1 | 314607 |
| B6BZW5 | 473788 |
| B6C0I4 | 473788 |
| B6ENI0 | 316275 |
| B6FNG8 | 500632 |
| B6FRH4 | 500632 |
| B6FZC6 | 500633 |
| B6FZT4 | 500633 |
| B6G839 | 445975 |
| B6HG11 | 500485 |
| B6I5N6 | 409438 |
| B6IUT9 | 414684 |
| B6J045 | 434923 |
| B6J6Z0 | 434924 |
| B6JA03 | 504832 |
| B6JN69 | 570508 |
| B6KET9 | 508771 |
| B6QGS4 | 441960 |
| B6R5C2 | 439495 |
| B6VUM5 | 483217 |
| B6WTF7 | 411464 |
| B6XE58 | 520999 |
| B6XXL9 | 566552 |
| B6XXM0 | 566552 |
| B6Y6J9 | 569881 |
| B6YRS7 | 511995 |
| B6ZVK1 | 502346 |
| B7AGZ1 | 483216 |
| B7AMN6 | 483216 |
| B7ANB7 | 483218 |
| B7BA50 | 537006 |
| B7BDF7 | 537006 |
| B7C765 | 518637 |
| B7CLT8 | 557724 |
| B7DRK9 | 543302 |
| B7DS75 | 543302 |
| B7G5H9 | 556484 |
| B7GG62 | 491915 |
| B7GM98 | 491915 |
| B7GM99 | 491915 |
| B7GT70 | 391904 |

|        |        |
|--------|--------|
| B7GT71 | 391904 |
| B7GWX5 | 557600 |
| B7HDS3 | 405532 |
| B7HIG3 | 405532 |
| B7HLD3 | 405534 |
| B7HMJ1 | 405534 |
| B7I9N9 | 480119 |
| B7IF16 | 484019 |
| B7IHJ1 | 484019 |
| B7IRB2 | 405531 |
| B7ITQ0 | 405531 |
| B7J4F0 | 243159 |
| B7JIX6 | 405535 |
| B7JJ77 | 405535 |
| B7K279 | 41431  |
| B7KCU2 | 65393  |
| B7L249 | 440085 |
| B7LAW9 | 585055 |
| B7LKZ7 | 585054 |
| B7M7T3 | 585034 |
| B7MJ14 | 585035 |
| B7N2N1 | 585397 |
| B7NFW7 | 585056 |
| B7NRY9 | 585057 |
| B7QX91 | 439497 |
| B7R8S8 | 391606 |
| B7RE47 | 443254 |
| B7RNK8 | 391589 |
| B7RTN9 | 247634 |
| B7UPI5 | 574521 |
| B7UY30 | 557722 |
| B7VI89 | 575788 |
| B7VK43 | 575788 |
| B7VQ40 | 575788 |
| B7X5P9 | 399795 |
| B7ZYQ0 | 4577   |
| B7ZZJ1 | 4577   |
| B8A8I6 | 39946  |
| B8AKZ6 | 39946  |
| B8ANP3 | 39946  |
| B8ANP4 | 39946  |
| B8C772 | 35128  |
| B8CT83 | 225849 |
| B8CW92 | 373903 |
| B8CWF5 | 373903 |
| B8DDI0 | 552536 |



|        |        |
|--------|--------|
| B8DE73 | 552536 |
| B8DHZ7 | 552536 |
| B8DPE6 | 883    |
| B8DVK4 | 442563 |
| B8DVK5 | 442563 |
| B8E0J9 | 515635 |
| B8E8U5 | 407976 |
| B8EB85 | 407976 |
| B8EI30 | 395965 |
| B8F9C8 | 439235 |
| B8FJ92 | 439235 |
| B8FQY9 | 272564 |
| B8G1K9 | 272564 |
| B8GB89 | 326427 |
| B8GJX1 | 521011 |
| B8GQV6 | 396588 |
| B8H212 | 565050 |
| B8HBX6 | 452863 |
| B8I6L4 | 394503 |
| B8I6L8 | 394503 |
| B8IUB2 | 460265 |
| B8IZW8 | 525146 |
| B8J6T3 | 455488 |
| B8J949 | 455488 |
| B8K3C0 | 391586 |
| B8KF70 | 566466 |
| B8KTM3 | 565045 |
| B8KY69 | 565045 |
| B8MBY8 | 441959 |
| B8NSE7 | 332952 |
| B8P2F0 | 561896 |
| B8Y631 | 1471   |
| B8Y634 | 1471   |
| B8ZLI0 | 561276 |
| B8ZT15 | 561304 |
| B9AEG5 | 483214 |
| B9BGL6 | 513051 |
| B9C002 | 513052 |
| B9C7Q3 | 513053 |
| B9CKN6 | 553184 |
| B9CRN6 | 553212 |
| B9CRV1 | 553212 |
| B9D1I1 | 553218 |
| B9DP21 | 396513 |
| B9DP88 | 396513 |
| B9DTI9 | 218495 |

|        |        |
|--------|--------|
| B9DZB1 | 583346 |
| B9E1L1 | 583346 |
| B9EBT0 | 458233 |
| B9EBZ4 | 458233 |
| B9EW03 | 39947  |
| B9F9Y5 | 39947  |
| B9H1N5 | 3694   |
| B9IV89 | 361100 |
| B9IX38 | 361100 |
| B9JB77 | 311403 |
| B9JT15 | 311402 |
| B9K868 | 309803 |
| B9KG13 | 306263 |
| B9KGP2 | 320483 |
| B9KM19 | 557760 |
| B9L3Q0 | 309801 |
| B9LAF0 | 598659 |
| B9LGR6 | 480224 |
| B9LUP7 | 416348 |
| B9M2T6 | 316067 |
| B9MAU0 | 535289 |
| B9ML58 | 521460 |
| B9MRC9 | 521460 |
| B9NDG6 | 3694   |
| B9NPL0 | 467661 |
| B9NYZ1 | 93058  |
| B9PMV9 | 5811   |
| B9Q868 | 432359 |
| B9QSN0 | 244592 |
| B9RGY9 | 3988   |
| B9WGK6 | 573826 |
| B9WWV7 | 286604 |
| B9XB17 | 320771 |
| B9XVH8 | 544405 |
| B9XZT6 | 544406 |
| B9YCJ4 | 545696 |
| B9Z6F9 | 279714 |
| C0ARP1 | 471881 |
| C0BAN7 | 470146 |
| C0BCI4 | 470146 |
| C0BI19 | 487796 |
| C0BP82 | 487797 |
| C0BR48 | 547043 |
| C0BR49 | 547043 |
| C0BYP5 | 553973 |
| C0CMH9 | 476272 |

|        |        |
|--------|--------|
| C0D843 | 518636 |
| C0DV21 | 546274 |
| C0DZQ5 | 566549 |
| C0EEV4 | 537013 |
| C0EJK3 | 546264 |
| C0EZ73 | 411469 |
| C0FWA6 | 622312 |
| C0G7Q6 | 595497 |
| C0GCS3 | 555088 |
| C0M8L5 | 553482 |
| C0MFQ0 | 553483 |
| C0N1T9 | 637616 |
| C0N7M2 | 637616 |
| C0NE81 | 447093 |
| C0PTM7 | 3332   |
| C0Q4C5 | 476213 |
| C0Q9T4 | 177437 |
| C0QG57 | 177437 |
| C0QRV4 | 123214 |
| C0R233 | 565034 |
| C0R3Y5 | 66084  |
| C0RFB7 | 546272 |
| C0VK18 | 525244 |
| C0VRK3 | 548477 |
| C0WBE1 | 563191 |
| C0WHW5 | 525260 |
| C0WRR3 | 525318 |
| C0WYX1 | 525325 |
| C0X696 | 491074 |
| C0XBX1 | 525326 |
| C0XH30 | 525327 |
| C0XU53 | 525263 |
| C0YCK9 | 595498 |
| C0YKJ2 | 525257 |
| C0Z0S1 | 585517 |
| C0Z9I8 | 358681 |
| C0ZF36 | 358681 |
| C0ZKZ0 | 358681 |
| C0ZN70 | 234621 |
| C1A411 | 379066 |
| C1AIG3 | 561275 |
| C1B9U9 | 632772 |
| C1C5F0 | 488221 |
| C1CCH9 | 488222 |
| C1CIR4 | 488223 |
| C1CPS3 | 487213 |

|        |        |
|--------|--------|
| C1CV31 | 546414 |
| C1D4K5 | 557598 |
| C1DQF8 | 322710 |
| C1DWH7 | 204536 |
| C1EP22 | 572264 |
| C1EPH7 | 572264 |
| C1F655 | 240015 |
| C1FDY8 | 296587 |
| C1FM03 | 536232 |
| C1FNA6 | 536232 |
| C1FS50 | 536232 |
| C1GF52 | 502780 |
| C1H9E9 | 502779 |
| C1HQ45 | 469598 |
| C1HX96 | 528345 |
| C1I573 | 457396 |
| C1I7H4 | 457396 |
| C1M5C5 | 469595 |
| C1MFF3 | 469595 |
| C1MSF0 | 564608 |
| C1NAP5 | 457400 |
| C1PAD2 | 345219 |
| C1V8K8 | 469382 |
| C2BEW6 | 525254 |
| C2BKS8 | 525264 |
| C2C141 | 525367 |
| C2C224 | 525367 |
| C2C3H4 | 525367 |
| C2C8K2 | 592313 |
| C2CE13 | 592313 |
| C2CED7 | 592313 |
| C2CS84 | 525268 |
| C2D2Q3 | 525310 |
| C2DIA0 | 525278 |
| C2DTK9 | 525281 |
| C2E688 | 525330 |
| C2E8A9 | 525362 |
| C2EE06 | 525362 |
| C2EFX9 | 525364 |
| C2EK91 | 525365 |
| C2EMK9 | 525365 |
| C2ESS9 | 525366 |
| C2EWS2 | 491077 |
| C2F3S0 | 548485 |
| C2FAU4 | 525337 |
| C2FC13 | 525337 |

|        |        |
|--------|--------|
| C2FNC6 | 525338 |
| C2FP75 | 525338 |
| C2FUG1 | 525372 |
| C2FUS4 | 525372 |
| C2GC87 | 548473 |
| C2GCF0 | 548473 |
| C2GJE2 | 548478 |
| C2GQH9 | 525341 |
| C2GSR0 | 548480 |
| C2GSR1 | 548480 |
| C2H019 | 525271 |
| C2HNU3 | 525306 |
| C2HPZ2 | 525306 |
| C2HTK8 | 593585 |
| C2HUC3 | 593585 |
| C2HZW4 | 593585 |
| C2I1Q7 | 593586 |
| C2I4B6 | 593586 |
| C2IGF8 | 593589 |
| C2IK37 | 593589 |
| C2IKT0 | 593589 |
| C2IN69 | 593590 |
| C2INK6 | 593590 |
| C2ISP0 | 593590 |
| C2IY76 | 417400 |
| C2IYN8 | 417400 |
| C2JBD5 | 593587 |
| C2JE88 | 593587 |
| C2JEL6 | 593587 |
| C2JL92 | 491075 |
| C2JTL4 | 525361 |
| C2JZF5 | 525361 |
| C2KC67 | 491076 |
| C2KFR1 | 491076 |
| C2KKI5 | 586220 |
| C2KSX4 | 585199 |
| C2KVF0 | 585501 |
| C2LM14 | 525369 |
| C2LTW1 | 596322 |
| C2LYR1 | 629742 |
| C2M0I0 | 629742 |
| C2M5D0 | 553178 |
| C2MJ68 | 526973 |
| C2MPD0 | 526973 |
| C2MZB1 | 526980 |
| C2N4U1 | 526980 |

|        |        |
|--------|--------|
| C2NG04 | 526970 |
| C2NLK3 | 526970 |
| C2NXH5 | 526967 |
| C2P2E4 | 526967 |
| C2PDD2 | 526971 |
| C2PIW5 | 526971 |
| C2PUE7 | 526972 |
| C2PZF0 | 526972 |
| C2QAE7 | 526968 |
| C2QFL4 | 526968 |
| C2QRF7 | 526977 |
| C2QWX1 | 526977 |
| C2R6I4 | 526969 |
| C2RBZ4 | 526969 |
| C2RLI3 | 526974 |
| C2RRV3 | 526974 |
| C2S244 | 526975 |
| C2S7J7 | 526975 |
| C2SIG4 | 526976 |
| C2SNU9 | 526976 |
| C2SZD0 | 526978 |
| C2T4Q3 | 526978 |
| C2TEY6 | 526979 |
| C2TKC0 | 526979 |
| C2TVP4 | 526981 |
| C2U136 | 526981 |
| C2UCA5 | 526982 |
| C2UHR7 | 526982 |
| C2UTR6 | 526983 |
| C2UZ39 | 526983 |
| C2VA66 | 526984 |
| C2VFM0 | 526984 |
| C2VS39 | 526985 |
| C2VXL1 | 526985 |
| C2W6L1 | 526986 |
| C2WAU4 | 526986 |
| C2WKV4 | 526987 |
| C2WRH8 | 526987 |
| C2WZH3 | 526988 |
| C2XA85 | 526989 |
| C2XFF8 | 526989 |
| C2XSF4 | 526990 |
| C2XXR0 | 526990 |
| C2Y942 | 526991 |
| C2YE50 | 526991 |
| C2YQ26 | 526992 |

|        |        |
|--------|--------|
| C2YV82 | 526992 |
| C2ZBI9 | 526993 |
| C2ZMZ0 | 526994 |
| C2ZT22 | 526994 |
| C3A4E1 | 526997 |
| C3A9I9 | 526997 |
| C3AK76 | 526998 |
| C3AVI6 | 526998 |
| C3B240 | 526999 |
| C3BDU1 | 526999 |
| C3BIU2 | 527000 |
| C3BNI7 | 527000 |
| C3C0S0 | 527024 |
| C3C6C3 | 527024 |
| C3CH72 | 527021 |
| C3CME7 | 527021 |
| C3D029 | 527025 |
| C3D5H9 | 527025 |
| C3DIB2 | 527026 |
| C3DNK0 | 527026 |
| C3E1Z4 | 527027 |
| C3E742 | 527027 |
| C3EJ84 | 527023 |
| C3EPB1 | 527023 |
| C3F016 | 527022 |
| C3F5R2 | 527022 |
| C3FIK7 | 527031 |
| C3FW64 | 527031 |
| C3G1C2 | 527032 |
| C3G6V0 | 527032 |
| C3GMQ4 | 527029 |
| C3GTH6 | 527029 |
| C3GZF3 | 527030 |
| C3H4W1 | 527030 |
| C3HGV1 | 527028 |
| C3HMG2 | 527028 |
| C3HYZ9 | 527019 |
| C3I4R9 | 527019 |
| C3IHW1 | 527020 |
| C3IN06 | 527020 |
| C3J4H1 | 550542 |
| C3J5C1 | 550542 |
| C3JNY9 | 596309 |
| C3JXY0 | 216595 |
| C3KUV1 | 515621 |
| C3KW45 | 515621 |

|        |        |
|--------|--------|
| C3L0A7 | 515621 |
| C3L6T7 | 568206 |
| C3L7C7 | 568206 |
| C3LRC2 | 579112 |
| C3LS37 | 579112 |
| C3LW86 | 579112 |
| C3MHQ7 | 394    |
| C3MPX3 | 429572 |
| C3MVA0 | 427317 |
| C3N5J9 | 427318 |
| C3NE63 | 439386 |
| C3NHK0 | 419942 |
| C3NS49 | 593588 |
| C3NW33 | 593588 |
| C3NWG8 | 593588 |
| C3P5K3 | 592021 |
| C3P6P0 | 592021 |
| C3PJR3 | 548476 |
| C3PLN0 | 347255 |
| C3PUW7 | 457395 |
| C3QFQ4 | 556258 |
| C3R1I6 | 469590 |
| C3R724 | 556260 |
| C3RLD1 | 556270 |
| C3SHV7 | 562    |
| C3X6X8 | 556268 |
| C3X7C3 | 556269 |
| C3XIA9 | 613026 |
| C3XK11 | 556267 |
| C4AQZ6 | 320390 |
| C4FBS6 | 521003 |
| C4FCI1 | 518635 |
| C4FCI2 | 518635 |
| C4FIV0 | 432331 |
| C4FPT6 | 546273 |
| C4FXW4 | 592026 |
| C4G635 | 592010 |
| C4GBQ7 | 626523 |
| C4GHX0 | 629741 |
| C4HAZ3 | 547047 |
| C4HE98 | 547046 |
| C4HRJ3 | 545431 |
| C4IH31 | 632245 |
| C4IJA9 | 632245 |
| C4IT74 | 641140 |
| C4IZ68 | 4577   |



|        |        |
|--------|--------|
| C4J2N3 | 4577   |
| C4JMH7 | 336963 |
| C4K1G5 | 562019 |
| C4KH64 | 426118 |
| C4KPW6 | 536230 |
| C4L2D0 | 360911 |
| C4L8A4 | 595494 |
| C4LGL9 | 645127 |
| C4MCM4 | 326425 |
| C4PML8 | 672161 |
| C4PR37 | 580049 |
| C4R700 | 644223 |
| C4RE98 | 219305 |
| C4RX34 | 349968 |
| C4SHY8 | 349967 |
| C4ST45 | 349966 |
| C4T675 | 349965 |
| C4TZB5 | 527012 |
| C4UDY7 | 527002 |
| C4UIR8 | 527005 |
| C4UXJ0 | 527004 |
| C4V2Z3 | 638302 |
| C4VHX4 | 553209 |
| C4VS19 | 630527 |
| C4WAN8 | 596319 |
| C4WAV3 | 596319 |
| C4WJ76 | 641118 |
| C4X024 | 484021 |
| C4XQB5 | 573370 |
| C4Y8G7 | 306902 |
| C4YGT6 | 5476   |
| C4YYG6 | 444612 |
| C4Z302 | 515620 |
| C4ZHN9 | 515619 |
| C4ZM70 | 85643  |
| C4ZMU8 | 85643  |
| C5A0W1 | 595496 |
| C5A1P0 | 593117 |
| C5A978 | 626418 |
| C5AVJ3 | 272630 |
| C5B6Y8 | 634503 |
| C5B6Y9 | 634503 |
| C5BMP9 | 377629 |
| C5BQN6 | 377629 |
| C5BXS8 | 471853 |
| C5C8L8 | 465515 |

|        |        |
|--------|--------|
| C5CHX6 | 521045 |
| C5CPW6 | 543728 |
| C5D5N5 | 471223 |
| C5D8G2 | 471223 |
| C5D9E3 | 471223 |
| C5DBN1 | 559295 |
| C5DWQ0 | 559307 |
| C5E9E5 | 537937 |
| C5E9E6 | 537937 |
| C5ELE2 | 457421 |
| C5EU25 | 457421 |
| C5EYE1 | 537972 |
| C5F629 | 537973 |
| C5F8N0 | 537973 |
| C5FIE4 | 554155 |
| C5GM03 | 559297 |
| C5JYP2 | 559298 |
| C5MDW1 | 294747 |
| C5N582 | 450394 |
| C5N5F3 | 450394 |
| C5NFL5 | 436115 |
| C5P7Y6 | 222929 |
| C5PUM6 | 525373 |
| C5PUV0 | 525373 |
| C5Q056 | 548474 |
| C5Q0C3 | 548474 |
| C5Q8W7 | 525374 |
| C5Q928 | 525374 |
| C5QIV5 | 548475 |
| C5QJ24 | 548475 |
| C5QS60 | 525378 |
| C5QSC7 | 525378 |
| C5QWU0 | 525376 |
| C5QX03 | 525376 |
| C5RCN7 | 585506 |
| C5RGM8 | 573061 |
| C5RGM9 | 573061 |
| C5RHU0 | 573061 |
| C5RVV3 | 573062 |
| C5S296 | 637911 |
| C5SMM0 | 573065 |
| C5T3D5 | 573060 |
| C5TH79 | 555217 |
| C5TNX7 | 596320 |
| C5TV95 | 573059 |
| C5UB33 | 509193 |

|        |        |
|--------|--------|
| C5UX60 | 536233 |
| C5UYS8 | 536233 |
| C5V5J1 | 395494 |
| C5VA09 | 553207 |
| C5VIM0 | 553174 |
| C5VSK7 | 592027 |
| C5VZX6 | 218494 |
| C5WBQ8 | 511693 |
| C5WEL3 | 486410 |
| C5WSV9 | 4558   |
| C5X492 | 4558   |
| C5XH02 | 4558   |
| C5ZJK3 | 357347 |
| C5ZWN7 | 537970 |
| C6A3H8 | 604354 |
| C6A4V8 | 604354 |
| C6A658 | 580050 |
| C6A659 | 580050 |
| C6AC51 | 634504 |
| C6AGR6 | 555970 |
| C6AGR7 | 555970 |
| C6APJ2 | 634176 |
| C6AXD7 | 395491 |
| C6BG99 | 428406 |
| C6BV82 | 526222 |
| C6C8Q2 | 579405 |
| C6CI16 | 561229 |
| C6CU07 | 324057 |
| C6D2E0 | 324057 |
| C6DFP5 | 561230 |
| C6DNE9 | 478434 |
| C6E2T8 | 443144 |
| C6EE00 | 469008 |
| C6GN14 | 568813 |
| C6GWP0 | 568814 |
| C6HG88 | 544712 |
| C6HZV4 | 412449 |
| C6I1P7 | 457392 |
| C6I6B6 | 457392 |
| C6ISS1 | 469586 |
| C6IW18 | 621372 |
| C6J3S6 | 621372 |
| C6JCT0 | 457412 |
| C6JE71 | 457412 |
| C6JPW0 | 469618 |
| C6LCF7 | 478749 |

|        |        |
|--------|--------|
| C6M9R2 | 547045 |
| C6MFN5 | 153948 |
| C6MN14 | 443143 |
| C6N2R9 | 658187 |
| C6NSA4 | 637389 |
| C6PN65 | 536227 |
| C6PQG2 | 536227 |
| C6QIY0 | 582899 |
| C6QKD6 | 581103 |
| C6QMF1 | 581103 |
| C6QRP3 | 581103 |
| C6R643 | 553201 |
| C6R7K7 | 553206 |
| C6RCV4 | 553219 |
| C6RNV7 | 596318 |
| C6RTL4 | 661513 |
| C6RUV9 | 661513 |
| C6S1R1 | 661513 |
| C6S7V8 | 662598 |
| C6SD68 | 663926 |
| C6SKK1 | 295996 |
| C6SNV9 | 511691 |
| C6TTL4 | 320371 |
| C6UJP8 | 413997 |
| C6V1Y4 | 544404 |
| C6VI55 | 644042 |
| C6VN31 | 644042 |
| C6VWJ0 | 471854 |
| C6WF56 | 446462 |
| C6WY10 | 583345 |
| C6X1M4 | 531844 |
| C6X7H1 | 582744 |
| C6XG43 | 537021 |
| C6XPY2 | 582402 |
| C6XYQ5 | 485917 |
| C6Y1Y1 | 485917 |
| C6YIH3 | 345072 |
| C6YJA6 | 345072 |
| C6YK51 | 345072 |
| C6YTA0 | 539329 |
| C6Z1U8 | 457394 |
| C7BNG6 | 553480 |
| C7C0D3 | 592205 |
| C7CE18 | 661410 |
| C7CPH6 | 565636 |
| C7CWN8 | 565637 |

|        |        |
|--------|--------|
| C7DBA8 | 633131 |
| C7G9N5 | 536231 |
| C7GSK1 | 574961 |
| C7H759 | 411483 |
| C7HGN3 | 572545 |
| C7HKA9 | 588857 |
| C7IFT6 | 588581 |
| C7IFU0 | 588581 |
| C7IPL5 | 589861 |
| C7JGR6 | 634452 |
| C7JMK1 | 634453 |
| C7JWR7 | 634454 |
| C7K711 | 634455 |
| C7KG80 | 634456 |
| C7KQJ4 | 634457 |
| C7KZV9 | 634458 |
| C7L258 | 634459 |
| C7LE98 | 568815 |
| C7LK10 | 595499 |
| C7LN53 | 525897 |
| C7LSQ4 | 525897 |
| C7M1N2 | 525909 |
| C7M5N6 | 521097 |
| C7MHT0 | 446465 |
| C7MMI9 | 469378 |
| C7MQR4 | 471857 |
| C7N6U0 | 471855 |
| C7N9C3 | 523794 |
| C7NAR5 | 523794 |
| C7NGA3 | 478801 |
| C7NKC4 | 478801 |
| C7NN19 | 519442 |
| C7NZY1 | 485914 |
| C7P9D0 | 573064 |
| C7PP97 | 485918 |
| C7PQ37 | 485918 |
| C7Q5M7 | 479433 |
| C7QKA7 | 479433 |
| C7QN85 | 395962 |
| C7QZS8 | 471856 |
| C7RNF3 | 522306 |
| C7T8R5 | 568703 |
| C7TEK8 | 568703 |
| C7TFG0 | 568704 |
| C7TLB8 | 568704 |
| C7U460 | 565638 |

|        |        |
|--------|--------|
| C7UCE0 | 565642 |
| C7UK02 | 565641 |
| C7USX1 | 565650 |
| C7V0W8 | 565640 |
| C7V889 | 565644 |
| C7VHQ2 | 565646 |
| C7VQU4 | 565649 |
| C7VYK2 | 565647 |
| C7WCN6 | 565648 |
| C7WH61 | 565643 |
| C7WSD2 | 565651 |
| C7WV76 | 565645 |
| C7X6K7 | 563193 |
| C7XCF7 | 563193 |
| C7XGF8 | 575595 |
| C7XI43 | 575595 |
| C7XTT4 | 575594 |
| C7XU11 | 575594 |
| C7Y2H0 | 575596 |
| C7Y5E3 | 575596 |
| C7Y8I8 | 565639 |
| C7YTJ1 | 660122 |
| C7ZWT7 | 585143 |
| C7ZX01 | 585143 |
| C8A3M5 | 585145 |
| C8A3T8 | 585145 |
| C8ABK4 | 585146 |
| C8ABR7 | 585146 |
| C8AKL4 | 585153 |
| C8AKS7 | 585153 |
| C8ARM0 | 585158 |
| C8ART3 | 585158 |
| C8JTE8 | 393124 |
| C8JVY8 | 393124 |
| C8JYS1 | 393124 |
| C8K0L6 | 393125 |
| C8K2I5 | 393125 |
| C8K780 | 393125 |
| C8K859 | 393128 |
| C8K8R7 | 393128 |
| C8KG31 | 393128 |
| C8KPG7 | 452948 |
| C8KPZ0 | 455227 |
| C8KW85 | 455227 |
| C8KX06 | 591023 |
| C8L3W2 | 553565 |

|        |        |
|--------|--------|
| C8L4M6 | 553565 |
| C8LBA3 | 553567 |
| C8LCL8 | 553567 |
| C8LK20 | 553568 |
| C8LK85 | 553568 |
| C8LVE9 | 553571 |
| C8LVL4 | 553571 |
| C8M2X6 | 553573 |
| C8M340 | 553573 |
| C8M5N3 | 553581 |
| C8M626 | 553581 |
| C8ME57 | 553583 |
| C8MHF8 | 553583 |
| C8MKH2 | 553588 |
| C8MKP0 | 553588 |
| C8MVR6 | 553592 |
| C8MXL6 | 553592 |
| C8N5H3 | 553596 |
| C8N5N7 | 553596 |
| C8N9W5 | 638300 |
| C8NE69 | 638301 |
| C8NR81 | 196164 |
| C8NXJ0 | 585529 |
| C8P7Q6 | 525309 |
| C8PLG7 | 553220 |
| C8PWG0 | 553217 |
| C8QG07 | 592316 |
| C8RV45 | 525262 |
| C8S594 | 371731 |
| C8SVB8 | 536019 |
| C8TMR7 | 573235 |
| C8TZV3 | 585395 |
| C8UKT1 | 585396 |
| C8V9C0 | 227321 |
| C8VZ36 | 485916 |
| C8W4M1 | 485916 |
| C8WA34 | 521095 |
| C8WEG6 | 622759 |
| C8WMF6 | 479437 |
| C8WVY7 | 521098 |
| C8WWK3 | 521098 |
| C8X3J2 | 485915 |
| C8X8D2 | 479431 |
| C8Z756 | 643680 |
| C9A058 | 565653 |
| C9A556 | 565655 |

|        |        |
|--------|--------|
| C9ATP2 | 565652 |
| C9CHB9 | 565654 |
| C9CWE0 | 644076 |
| C9CZ91 | 644076 |
| C9KIU3 | 500635 |
| C9KRP8 | 483215 |
| C9L843 | 537007 |
| C9L8F7 | 537007 |
| C9LKK5 | 626522 |
| C9LL43 | 592028 |
| C9LTP2 | 546271 |
| C9MKZ8 | 649761 |
| C9MVL8 | 634994 |
| C9MVL9 | 634994 |
| C9MWZ5 | 634994 |
| C9NH17 | 591167 |
| C9NZT0 | 675814 |
| C9P2H6 | 675813 |
| C9P2V7 | 675813 |
| C9P8C3 | 675813 |
| C9P9I5 | 675811 |
| C9P9V3 | 675811 |
| C9PHS5 | 675811 |
| C9PN34 | 667128 |
| C9PZB2 | 619693 |
| C9Q268 | 675810 |
| C9Q2M6 | 675810 |
| C9QAC6 | 675810 |
| C9QF32 | 675816 |
| C9QMF5 | 675816 |
| C9QV55 | 536056 |
| C9RCP5 | 429009 |
| C9RE81 | 579137 |
| C9RQY6 | 59374  |
| C9RVY1 | 544556 |
| C9S0D9 | 544556 |
| C9T3Z2 | 520459 |
| C9TCW1 | 520460 |
| C9TP82 | 520463 |
| C9TVL3 | 520461 |
| C9U5Y5 | 520454 |
| C9UF58 | 520452 |
| C9UPE5 | 520451 |
| C9UUD8 | 520450 |
| C9VBY7 | 520456 |
| C9VIA1 | 520457 |



|        |        |
|--------|--------|
| C9VW43 | 520455 |
| C9WYL4 | 604162 |
| C9XCA5 | 568708 |
| C9XJR9 | 645462 |
| C9XPI4 | 645462 |
| C9Y1H9 | 413502 |
| C9YAV2 | 667019 |
| C9YKR1 | 645463 |
| C9YN02 | 645463 |
| C9Z3Y3 | 680198 |
| D0AY26 | 575591 |
| D0B3C6 | 224914 |
| D0BER3 | 520488 |
| D0BL62 | 626369 |
| D0BYI0 | 575564 |
| D0CE96 | 575584 |
| D0CM52 | 166314 |
| D0CWV3 | 644107 |
| D0D7X0 | 501479 |
| D0D8J7 | 501479 |
| D0DEW4 | 575597 |
| D0DHK9 | 575597 |
| D0DRF7 | 575599 |
| D0FWR8 | 79967  |
| D0GD28 | 520465 |
| D0GJX6 | 596323 |
| D0GTI7 | 675806 |
| D0GUJ3 | 675806 |
| D0GYU1 | 675806 |
| D0H312 | 675807 |
| D0H754 | 675807 |
| D0H9B1 | 675807 |
| D0HBX4 | 675820 |
| D0HCA3 | 675820 |
| D0HCR1 | 675820 |
| D0HKH8 | 675808 |
| D0HM52 | 675808 |
| D0HNV2 | 675808 |
| D0HZF4 | 675809 |
| D0I571 | 675812 |
| D0I9M7 | 675812 |
| D0ICZ1 | 675815 |
| D0IDL6 | 675815 |
| D0ITS5 | 290847 |
| D0J2I6 | 688245 |
| D0JIU6 | 637382 |

|        |        |
|--------|--------|
| D0JSY0 | 637385 |
| D0K0U4 | 684950 |
| D0K4Q1 | 681288 |
| D0K4W8 | 681288 |
| D0KAM2 | 561231 |
| D0KTK5 | 555311 |
| D0KXP8 | 555778 |
| D0LDH5 | 526226 |
| D0LLE6 | 502025 |
| D0LME8 | 502025 |
| D0LQD5 | 502025 |
| D0LU72 | 502025 |
| D0LXY0 | 502025 |
| D0M309 | 150340 |
| D0M6H7 | 150340 |
| D0M7Q5 | 150340 |
| D0MH40 | 518766 |
| D0P977 | 520489 |
| D0PLV8 | 520487 |
| D0R4B8 | 633699 |
| D0RK46 | 437701 |
| D0RWG5 | 469609 |
| D0RZQ6 | 575585 |
| D0SC44 | 575586 |
| D0SMN4 | 575587 |
| D0STI3 | 575588 |
| D0T248 | 575589 |
| D0TCN3 | 469589 |
| D0TGT1 | 469589 |
| D0TW94 | 469588 |
| D0W0K7 | 546262 |
| D0W935 | 546265 |
| D0WJW1 | 649743 |
| D0WUF9 | 674977 |
| D0WXR1 | 674977 |
| D0X0X5 | 674977 |
| D0X0X6 | 674977 |
| D0X7S5 | 673519 |
| D0XAC1 | 673519 |
| D0XI13 | 673519 |
| D0XIR7 | 633149 |
| D0YP70 | 596328 |
| D0YW37 | 675817 |
| D0Z1R7 | 675817 |
| D0Z4G7 | 675817 |
| D0Z9V8 | 498217 |

|        |        |
|--------|--------|
| DOZR31 | 588858 |
| DOZYW9 | 406984 |
| D1A888 | 471852 |
| D1ANM9 | 526218 |
| D1ANQ2 | 526218 |
| D1ATW7 | 574556 |
| D1AYU1 | 519441 |
| D1B2S7 | 525898 |
| D1B629 | 525903 |
| D1BKF9 | 446469 |
| D1BN50 | 479436 |
| D1BUT0 | 446471 |
| D1C8E5 | 479434 |
| D1CFQ4 | 525904 |
| D1CTZ4 | 520449 |
| D1D5C5 | 528346 |
| D1D8Y1 | 528352 |
| D1DIQ2 | 528354 |
| D1DNK3 | 528356 |
| D1DVH0 | 528355 |
| D1E277 | 528358 |
| D1E8J0 | 528359 |
| D1EEZ6 | 528360 |
| D1ENS9 | 520462 |
| D1F025 | 520464 |
| D1F506 | 520466 |
| D1FG80 | 520458 |
| D1GTM3 | 663951 |
| D1GU90 | 663951 |
| D1JRI7 | 469587 |
| D1JTE8 | 469587 |
| D1K0H2 | 457391 |
| D1NJH5 | 492476 |
| D1NVW8 | 561180 |
| D1NVW9 | 561180 |
| D1P754 | 500637 |
| D1P965 | 537011 |
| D1PMY0 | 411471 |
| D1PV65 | 585502 |
| D1Q7K9 | 553594 |
| D1QDL4 | 553594 |
| D1QLD8 | 553601 |
| D1QLX4 | 553601 |
| D1QMU5 | 649760 |
| D1QX06 | 553574 |
| D1QX75 | 553574 |

|        |        |
|--------|--------|
| D1R4Q1 | 159254 |
| D1RG75 | 638315 |
| D1RUY2 | 682634 |
| D1S8Q3 | 644283 |
| D1T2T9 | 643561 |
| D1TXH8 | 687916 |
| D1U5I0 | 643562 |
| D1UI81 | 640510 |
| D1V9Y3 | 298654 |
| D1W171 | 679189 |
| D1W583 | 679190 |
| D1WNM8 | 596317 |
| D1WNU7 | 596317 |
| D1WRU2 | 649189 |
| D1XKT9 | 647653 |
| D1XXR8 | 553171 |
| D1Y8A5 | 352165 |
| D1YEB6 | 679194 |
| D1YIS3 | 679196 |
| D1YRU0 | 686660 |
| D1Z1L3 | 304371 |
| D2ADZ7 | 591020 |
| D2BCV9 | 479432 |
| D2BJW1 | 311424 |
| D2BPM0 | 684738 |
| D2BXE2 | 590409 |
| D2C3S2 | 590168 |
| D2ERT1 | 563037 |
| D2EVT8 | 585543 |
| D2F0K0 | 585543 |
| D2F6N7 | 585149 |
| D2F6V1 | 585149 |
| D2FCT3 | 585151 |
| D2FCZ7 | 585151 |
| D2FLK8 | 585152 |
| D2FLS8 | 585152 |
| D2FV18 | 585159 |
| D2FV82 | 585159 |
| D2G0Z0 | 585160 |
| D2G1Q4 | 585160 |
| D2G9E1 | 585161 |
| D2GAK3 | 585161 |
| D2GFW9 | 585148 |
| D2GG34 | 585148 |
| D2GR78 | 585150 |
| D2GRE3 | 585150 |

|        |        |
|--------|--------|
| D2LFQ0 | 648757 |
| D2LSC0 | 649639 |
| D2LTI3 | 649639 |
| D2M012 | 649639 |
| D2M2Y9 | 652103 |
| D2MHF7 | 700750 |
| D2MK45 | 700750 |
| D2MS67 | 683082 |
| D2MX53 | 683083 |
| D2N6V5 | 523796 |
| D2N720 | 523796 |
| D2NER3 | 431946 |
| D2NPN8 | 680646 |
| D2NXQ8 | 653938 |
| D2P1E4 | 653938 |
| D2P261 | 653938 |
| D2P480 | 637381 |
| D2P4Z7 | 637381 |
| D2P933 | 637381 |
| D2PK17 | 425944 |
| D2PUM8 | 479435 |
| D2Q7U0 | 401473 |
| D2Q7U1 | 401473 |
| D2QRU9 | 504472 |
| D2QS15 | 504472 |
| D2R4Y9 | 530564 |
| D2RHJ7 | 572546 |
| D2RKF3 | 591001 |
| D2RSU3 | 543526 |
| D2S669 | 526225 |
| D2T8N4 | 644651 |
| D2TSP0 | 637910 |
| D2TWH3 | 638    |
| D2ULU5 | 585155 |
| D2UM14 | 585155 |
| D2URU8 | 585147 |
| D2US11 | 585147 |
| D2Y941 | 671074 |
| D2YHU1 | 671074 |
| D2YJ96 | 671074 |
| D2YU32 | 671076 |
| D2YUG1 | 671076 |
| D2YUX7 | 671076 |
| D2Z763 | 469381 |
| D2ZHN1 | 500639 |
| D2ZQ42 | 521002 |
| D2ZZE0 | 546266 |
| D3A2Z7 | 546268 |

|        |        |
|--------|--------|
| D3AK14 | 566550 |
| D3C1C0 | 653733 |
| D3C955 | 648999 |
| D3CZI4 | 102897 |
| D3DGF2 | 608538 |
| D3DLV4 | 559292 |
| D3DYX2 | 634498 |
| D3E6K6 | 481743 |
| D3E6N5 | 481743 |
| D3EQ47 | 713887 |
| D3EW70 | 703339 |
| D3EWD5 | 703339 |
| D3FFA3 | 469383 |
| D3FKA2 | 567106 |
| D3FTZ1 | 398511 |
| D3FWG1 | 398511 |
| D3FZ68 | 398511 |
| D3GT05 | 216592 |
| D3HAM9 | 365659 |
| D3HH74 | 637909 |
| D3HRC9 | 661367 |
| D3HZA6 | 575611 |
| D3I625 | 575612 |
| D3I9Y3 | 575614 |
| D3IG36 | 575615 |
| D3KMP3 | 393121 |
| D3KQ01 | 393121 |
| D3KQ95 | 393121 |
| D3L1V0 | 592015 |
| D3L2V5 | 592015 |
| D3LB41 | 655225 |
| D3LPM3 | 596312 |
| D3LUC6 | 699218 |
| D3M4R6 | 656024 |
| D3MEQ6 | 679195 |
| D3MMX6 | 686659 |
| D3MYQ8 | 547146 |
| D3NA37 | 640512 |
| D3NNU3 | 663278 |
| D3NQS3 | 137722 |
| D3PDH4 | 639282 |
| D3PQK8 | 504728 |
| D3Q5Q9 | 446470 |
| D3QCX4 | 698737 |
| D3QD59 | 698737 |
| D3QK31 | 701177 |
| D3R269 | 699246 |
| D3R3B3 | 552531 |
| D3R3B4 | 552531 |
| D3RG76 | 640131 |
| D3RRY6 | 572477 |
| D3RWV9 | 589924 |
| D3S5V6 | 644281 |
| D3SAQ5 | 396595 |

|        |        |
|--------|--------|
| D3SKS4 | 633145 |
| D3SPA2 | 638303 |
| D3SV98 | 547559 |
| D3T907 | 580331 |
| D3UFY6 | 679897 |
| D3UMD5 | 683837 |
| D3UN23 | 683837 |
| D3UR60 | 683837 |
| D3UUH6 | 634464 |
| D3V642 | 406818 |
| D3VBY0 | 406817 |
| D4AXF4 | 663331 |
| D4B8P4 | 500640 |
| D4BKW4 | 500640 |
| D4BLU7 | 518634 |
| D4BLU8 | 518634 |
| D4BZT7 | 521000 |
| D4CH20 | 411486 |
| D4CHG2 | 411486 |
| D4CQB1 | 608534 |
| D4DL49 | 663202 |
| D4DTA9 | 546263 |
| D4E0J1 | 667129 |
| D4EIK8 | 699185 |
| D4EX33 | 699186 |
| D4F073 | 500638 |
| D4FCL6 | 679188 |
| D4FGQ8 | 679188 |
| D4FIV2 | 525375 |
| D4FJC8 | 525375 |
| D4FRA1 | 655813 |
| D4FWS5 | 645657 |
| D4FZS2 | 645657 |
| D4G551 | 645657 |
| D4GH99 | 706191 |
| D4GYK3 | 309800 |
| D4H838 | 522772 |
| D4HB04 | 553199 |
| D4I2T1 | 665029 |
| D4ID84 | 716540 |
| D4IYV9 | 657324 |
| D4J5I5 | 717962 |
| D4JME0 | 657317 |
| D4JVY5 | 657319 |
| D4K3V9 | 718252 |
| D4KBU6 | 657322 |
| D4KID4 | 657316 |
| D4KLF7 | 657315 |
| D4L4Q9 | 657321 |
| D4LAL9 | 213810 |
| D4LJF8 | 657323 |
| D4LKL9 | 657323 |
| D4LQD9 | 657314 |
| D4LXX7 | 657314 |

|        |        |
|--------|--------|
| D4M5L9 | 657313 |
| D4M5X0 | 657313 |
| D4MAZ8 | 651822 |
| D4MJG1 | 717961 |
| D4MQ89 | 245012 |
| D4MYN6 | 245018 |
| D4PJ42 | 393117 |
| D4PK82 | 393117 |
| D4PQJ4 | 393117 |
| D4PT73 | 393131 |
| D4PTT7 | 393131 |
| D4PZH6 | 393131 |
| D4Q521 | 401650 |
| D4Q5T2 | 401650 |
| D4Q7D3 | 401650 |
| D4RZA5 | 511680 |
| D4S8N3 | 585503 |
| D4SH06 | 585531 |
| D4TEP6 | 533240 |
| D4TQ88 | 533247 |
| D4U0C1 | 649742 |
| D4U3K5 | 553590 |
| D4UAC5 | 553590 |
| D4UEN9 | 553580 |
| D4UEW1 | 553580 |
| D4UR74 | 246199 |
| D4V056 | 791166 |
| D4V6J4 | 702446 |
| D4VT99 | 702447 |
| D4W5Y2 | 702450 |
| D4WL27 | 702443 |
| D4WSX4 | 702444 |
| D4XGB6 | 742159 |
| D4XPC5 | 707232 |
| D4XZF5 | 552811 |
| D4Y3U2 | 634956 |
| D4Y4Q1 | 634956 |
| D4Y861 | 634956 |
| D4YEG4 | 655812 |
| D4YMN5 | 585530 |
| D4YRH6 | 585524 |
| D4Z3Y4 | 452662 |
| D4ZC21 | 637905 |
| D4ZT24 | 696747 |
| D5AJS2 | 423211 |
| D5AMP7 | 272942 |
| D5AY21 | 449216 |
| D5B4I1 | 637386 |
| D5BEE1 | 655815 |
| D5BEU4 | 655815 |
| D5BMX7 | 488538 |
| D5BZJ7 | 472759 |
| D5C3W2 | 472759 |
| D5CBP5 | 716541 |



|        |        |
|--------|--------|
| D5CS07 | 580332 |
| D5D6M2 | 714962 |
| D5D8H3 | 641892 |
| D5DFE2 | 592022 |
| D5DKV9 | 592022 |
| D5DLR0 | 592022 |
| D5DQ49 | 545693 |
| D5DR12 | 545693 |
| D5DTQ3 | 545693 |
| D5E9A3 | 547558 |
| D5EC81 | 572547 |
| D5EPB1 | 583355 |
| D5EXM1 | 264731 |
| D5GY22 | 748671 |
| D5H2T5 | 748671 |
| D5H627 | 761659 |
| D5HJ58 | 751585 |
| D5MES8 | 671143 |
| D5MZ24 | 703612 |
| D5N131 | 703612 |
| D5N4B0 | 703612 |
| D5NF78 | 243261 |
| D5NVD5 | 649754 |
| D5P918 | 525368 |
| D5PKB1 | 525370 |
| D5Q3R3 | 525259 |
| D5Q5X2 | 525259 |
| D5QFW3 | 714995 |
| D5QME0 | 595536 |
| D5R0H6 | 642492 |
| D5RJC4 | 525371 |
| D5RZW9 | 525258 |
| D5S2N4 | 525258 |
| D5S9Q9 | 760570 |
| D5SDJ1 | 762948 |
| D5SVI9 | 521674 |
| D5T4P6 | 762051 |
| D5TE68 | 423212 |
| D5TFC0 | 573236 |
| D5TFC1 | 573236 |
| D5TUT5 | 714359 |
| D5TWJ2 | 714359 |
| D5UAA4 | 526224 |
| D5ULP5 | 446466 |
| D5UN58 | 521096 |
| D5UZ64 | 572480 |
| D5V1F3 | 572480 |
| D5VB02 | 749219 |
| D5VEY2 | 509190 |
| D5VRZ1 | 573063 |
| D5VXB1 | 758678 |
| D5VZE9 | 758678 |
| D5W207 | 758678 |
| D5W8Y7 | 640511 |

|        |        |
|--------|--------|
| D5WPL9 | 562970 |
| D5WUK5 | 562970 |
| D5X513 | 75379  |
| D5XAE4 | 635013 |
| D5XF36 | 635013 |
| D5XNL3 | 515617 |
| D5Y9W1 | 520141 |
| D5YLF9 | 520140 |
| D5YXY2 | 515616 |
| D5ZAT4 | 537209 |
| D5ZMQ5 | 537210 |
| D6A946 | 566461 |
| D6AV84 | 457431 |
| D6AWB1 | 457425 |
| D6CRF5 | 426114 |
| D6D486 | 657309 |
| D6DAM2 | 722911 |
| D6DDK3 | 717608 |
| D6DPS3 | 718254 |
| D6E0T6 | 657318 |
| D6E7I6 | 657308 |
| D6EPL3 | 457428 |
| D6FTX4 | 611304 |
| D6GM48 | 469608 |
| D6GPY6 | 546269 |
| D6GYL8 | 585156 |
| D6GYT2 | 585156 |
| D6H8I6 | 528348 |
| D6HGI0 | 585144 |
| D6HGP3 | 585144 |
| D6I3R4 | 550672 |
| D6IGW4 | 550676 |
| D6IJJ8 | 656380 |
| D6IZZ3 | 585157 |
| D6J056 | 585157 |
| D6J510 | 550677 |
| D6JMF3 | 528351 |
| D6JRB7 | 575565 |
| D6K920 | 645465 |
| D6KIB4 | 457416 |
| D6KNG9 | 450749 |
| D6KVP7 | 641146 |
| D6L1X8 | 641147 |
| D6LQ93 | 520448 |
| D6LXH3 | 585154 |
| D6LXN7 | 585154 |
| D6MHI9 | 536227 |
| D6RYY3 | 525284 |
| D6RYY4 | 525284 |
| D6SH18 | 548470 |
| D6SH82 | 548470 |
| D6SQU7 | 555779 |
| D6SWP1 | 682147 |
| D6T1A1 | 682148 |

|        |        |
|--------|--------|
| D6T481 | 553577 |
| D6T4M5 | 553577 |
| D6UAM5 | 762962 |
| D6UAU1 | 762962 |
| D6UKS3 | 585535 |
| D6UYZ5 | 682795 |
| D6V0F7 | 666684 |
| D6VNV5 | 596153 |
| D6XRA1 | 637913 |
| D6XSX5 | 439292 |
| D6XU18 | 439292 |
| D6Y1G2 | 439292 |
| D6YAG3 | 469371 |
| D6YDC6 | 707184 |
| D6YFG9 | 707185 |
| D6YI35 | 707186 |
| D6YKR0 | 707187 |
| D6YMH4 | 707183 |
| D6YVR7 | 716544 |
| D6YY46 | 718219 |
| D6Z1T7 | 589865 |
| D6ZC84 | 640132 |
| D6ZJS1 | 548479 |
| D6ZQP3 | 525381 |
| D6ZXJ4 | 759350 |
| D6ZXJ5 | 759350 |
| D7A5C4 | 639283 |
| D7AJN0 | 663917 |
| D7AP26 | 583358 |
| D7B0A9 | 446468 |
| D7BFP1 | 526227 |
| D7C517 | 749414 |
| D7CNE5 | 643648 |
| D7CUW5 | 649638 |
| D7CZH9 | 691437 |
| D7D4H0 | 691437 |
| D7DDI4 | 759363 |
| D7DGV9 | 759364 |
| D7DL85 | 666681 |
| D7DTR1 | 456320 |
| D7DXE1 | 551115 |
| D7EBL4 | 644295 |
| D7EX22 | 515615 |
| D7FCA6 | 693745 |
| D7FXQ9 | 2880   |
| D7GIJ9 | 754252 |
| D7GZZ1 | 520453 |
| D7HC03 | 345074 |
| D7HNC1 | 412967 |
| D7HS58 | 412967 |
| D7HSI2 | 412967 |
| D7I350 | 693985 |
| D7IF76 | 469585 |
| D7ING2 | 469592 |

|        |        |
|--------|--------|
| D7IS38 | 469592 |
| D7J440 | 585544 |
| D7JI36 | 656379 |
| D7K2K8 | 457390 |
| D7L9I8 | 81972  |
| D7M587 | 81972  |
| D7M5Z6 | 81972  |
| D7N0C8 | 641149 |
| D7NAV1 | 563008 |
| O23653 | 3702   |
| O25827 | 210    |
| O26893 | 187420 |
| O29558 | 2234   |
| O58588 | 53953  |
| O58813 | 53953  |
| O60163 | 4896   |
| O67221 | 63363  |
| O69077 | 287    |
| O84367 | 813    |
| P08495 | 1423   |
| P0A4Z8 | 1773   |
| P0A4Z9 | 1765   |
| P10869 | 4932   |
| P26512 | 1718   |
| P41398 | 28028  |
| P41403 | 1772   |
| P53553 | 1422   |
| P61488 | 262724 |
| P61489 | 274    |
| P74569 | 1148   |
| P94417 | 1423   |
| Q01GS4 | 70448  |
| Q01R25 | 234267 |
| Q02I64 | 208963 |
| Q030N1 | 272622 |
| Q036H1 | 321967 |
| Q03CV9 | 321967 |
| Q03HS8 | 278197 |
| Q03M59 | 322159 |
| Q03Y29 | 203120 |
| Q043C1 | 324831 |
| Q04795 | 1423   |
| Q049T8 | 321956 |
| Q04DS2 | 203123 |
| Q04M61 | 373153 |
| Q04V37 | 355277 |
| Q04YE0 | 355276 |
| Q05FN2 | 387662 |
| Q05UL7 | 221359 |
| Q062N7 | 313625 |
| Q07VB5 | 316055 |
| Q088B9 | 318167 |
| Q08PK2 | 378806 |
| Q08XR7 | 378806 |

|        |        |
|--------|--------|
| Q0A8K8 | 187272 |
| Q0AEC6 | 335283 |
| Q0AME2 | 394221 |
| Q0AQP6 | 394221 |
| Q0AXC9 | 335541 |
| Q0BDV8 | 339670 |
| Q0BUK4 | 391165 |
| Q0C1P2 | 228405 |
| Q0C4J6 | 228405 |
| Q0CA14 | 341663 |
| Q0EYM5 | 314345 |
| Q0F0P2 | 314345 |
| Q0F3Y6 | 367336 |
| Q0FI20 | 314265 |
| Q0FMZ9 | 314265 |
| Q0G7Y6 | 314231 |
| Q0HL59 | 60480  |
| Q0HMI4 | 60480  |
| Q0HRA4 | 60481  |
| Q0HXF7 | 60481  |
| Q0IE09 | 64471  |
| Q0KCA5 | 381666 |
| Q0KJ33 | 68570  |
| Q0PAT5 | 197    |
| Q0RN33 | 326424 |
| Q0RT24 | 326424 |
| Q0S8Q4 | 101510 |
| Q0SSE2 | 289380 |
| Q0SXP2 | 373384 |
| Q0TA37 | 362663 |
| Q0TPS5 | 195103 |
| Q0UFQ9 | 13684  |
| Q0VNK3 | 393595 |
| Q0W3M8 | 351160 |
| Q0YTF2 | 377431 |
| Q10AJ5 | 39947  |
| Q11A81 | 203124 |
| Q11E02 | 266779 |
| Q11NQ9 | 269798 |
| Q129L7 | 296591 |
| Q12JW6 | 318161 |
| Q12UL7 | 259564 |
| Q13F00 | 316057 |
| Q13X64 | 266265 |
| Q15QA7 | 342610 |
| Q167U1 | 375451 |
| Q17VH3 | 382638 |
| Q188C0 | 272563 |
| Q18BI5 | 272563 |
| Q18DI7 | 362976 |
| Q1AX22 | 266117 |
| Q1AZV0 | 266117 |
| Q1B291 | 164756 |
| Q1BHN7 | 331271 |

|        |        |
|--------|--------|
| Q1CC28 | 360102 |
| Q1CNS5 | 377628 |
| Q1CS34 | 357544 |
| Q1D2T9 | 246197 |
| Q1D6R0 | 246197 |
| Q1G9N2 | 390333 |
| Q1GF99 | 292414 |
| Q1GJ79 | 292414 |
| Q1GNW4 | 117207 |
| Q1GR69 | 117207 |
| Q1H3V0 | 265072 |
| Q1I6Z9 | 384676 |
| Q1INQ8 | 204669 |
| Q1IRL6 | 204669 |
| Q1IZB0 | 319795 |
| Q1JY31 | 281689 |
| Q1LPF1 | 266264 |
| Q1MBB0 | 216596 |
| Q1MPM0 | 363253 |
| Q1MZC2 | 207949 |
| Q1N045 | 207949 |
| Q1NBF6 | 314266 |
| Q1NEV2 | 314266 |
| Q1NSC0 | 262489 |
| Q1Q5R5 | 174633 |
| Q1QA87 | 335284 |
| Q1QQY5 | 323097 |
| Q1QZX0 | 290398 |
| Q1R3R4 | 364106 |
| Q1RGM9 | 336407 |
| Q1V1S8 | 314261 |
| Q1V9B4 | 314288 |
| Q1VDX5 | 314288 |
| Q1VZ05 | 313595 |
| Q1WT92 | 362948 |
| Q1YGE6 | 287752 |
| Q1YHV7 | 287752 |
| Q1YR95 | 314287 |
| Q1Z1U0 | 314280 |
| Q1Z482 | 314280 |
| Q1Z755 | 314280 |
| Q1ZDH4 | 314282 |
| Q1ZN91 | 314292 |
| Q1ZNV7 | 314292 |
| Q21BZ7 | 316056 |
| Q21L67 | 203122 |
| Q21LH5 | 203122 |
| Q21YR6 | 338969 |
| Q24UK4 | 138119 |
| Q24VS6 | 138119 |
| Q255G1 | 264202 |
| Q26E20 | 156586 |
| Q28MF4 | 290400 |
| Q2B0K5 | 313627 |

|        |        |
|--------|--------|
| Q2B6P8 | 313627 |
| Q2BCH7 | 313627 |
| Q2BGE5 | 207954 |
| Q2BQV4 | 207954 |
| Q2C0E2 | 121723 |
| Q2C126 | 121723 |
| Q2CDC1 | 314256 |
| Q2CFH7 | 314256 |
| Q2FT50 | 323259 |
| Q2FYP1 | 93061  |
| Q2FYV5 | 93061  |
| Q2G334 | 279238 |
| Q2GFJ5 | 205920 |
| Q2GXN2 | 38033  |
| Q2IFJ6 | 290397 |
| Q2IIV3 | 290397 |
| Q2J421 | 316058 |
| Q2JB98 | 106370 |
| Q2JGE2 | 106370 |
| Q2JPR1 | 321332 |
| Q2JTT1 | 321327 |
| Q2K3S9 | 347834 |
| Q2KX43 | 360910 |
| Q2LTK0 | 56780  |
| Q2N5P0 | 314225 |
| Q2NHW4 | 339860 |
| Q2NR03 | 343509 |
| Q2RIX2 | 264732 |
| Q2RJK8 | 264732 |
| Q2RWE8 | 269796 |
| Q2S1R8 | 309807 |
| Q2S5A5 | 309807 |
| Q2SBU0 | 349521 |
| Q2SX74 | 271848 |
| Q2UTJ9 | 5062   |
| Q2W6V9 | 342108 |
| Q2Y519 | 115547 |
| Q2Y7N5 | 323848 |
| Q2YLN6 | 359391 |
| Q2YXT9 | 273036 |
| Q2YXX6 | 273036 |
| Q30Q04 | 326298 |
| Q30ZQ1 | 207559 |
| Q317Z4 | 74546  |
| Q31F92 | 317025 |
| Q31IA6 | 317025 |
| Q31PI8 | 1140   |
| Q31TX2 | 300268 |
| Q328X6 | 300267 |
| Q39EZ2 | 269483 |
| Q39UG5 | 269799 |
| Q3A5V0 | 338963 |
| Q3AAV6 | 246194 |
| Q3ACY4 | 246194 |

|        |        |
|--------|--------|
| Q3ANI2 | 110662 |
| Q3AP04 | 340177 |
| Q3B0T2 | 316279 |
| Q3B0T5 | 316279 |
| Q3B179 | 319225 |
| Q3CZ22 | 342615 |
| Q3DA78 | 342616 |
| Q3DEV1 | 342617 |
| Q3DJR2 | 342614 |
| Q3DPN8 | 342613 |
| Q3DT23 | 342613 |
| Q3EXH1 | 339854 |
| Q3IKT4 | 326442 |
| Q3ILF2 | 326442 |
| Q3IU17 | 348780 |
| Q3J5D6 | 272943 |
| Q3JCA9 | 323261 |
| Q3JCK7 | 323261 |
| Q3JQU0 | 320372 |
| Q3K893 | 205922 |
| Q3KLZ4 | 315277 |
| Q3M6Y8 | 240292 |
| Q3SK68 | 292415 |
| Q3SVP5 | 323098 |
| Q3YR16 | 269484 |
| Q3YUW1 | 300269 |
| Q3Z622 | 243164 |
| Q3ZZW8 | 255470 |
| Q46133 | 1718   |
| Q46E57 | 269797 |
| Q46IE2 | 59920  |
| Q473C9 | 264198 |
| Q47D33 | 159087 |
| Q47TY3 | 269800 |
| Q483N2 | 167879 |
| Q48G26 | 264730 |
| Q49XB4 | 342451 |
| Q49XJ5 | 342451 |
| Q4BZN9 | 165597 |
| Q4EAE6 | 307502 |
| Q4EEU1 | 267410 |
| Q4EIP5 | 267410 |
| Q4ENE2 | 267409 |
| Q4ESL2 | 267409 |
| Q4ETU2 | 267409 |
| Q4FNA1 | 198252 |
| Q4FRP9 | 259536 |
| Q4HH89 | 306254 |
| Q4HTE4 | 306264 |
| Q4J8Y8 | 2285   |
| Q4JQJ2 | 95640  |
| Q4JSM7 | 306537 |
| Q4K844 | 220664 |
| Q4L636 | 279808 |



|        |        |
|--------|--------|
| Q4L698 | 279808 |
| Q4MK97 | 269801 |
| Q4MUL1 | 269801 |
| Q4PG91 | 5270   |
| Q4UK84 | 42862  |
| Q4WTP2 | 5085   |
| Q4ZQI5 | 205918 |
| Q55N96 | 5207   |
| Q57991 | 2190   |
| Q57B20 | 235    |
| Q57H07 | 28901  |
| Q59229 | 126782 |
| Q59ME9 | 5476   |
| Q5A474 | 5476   |
| Q5AS71 | 162425 |
| Q5DYF1 | 312309 |
| Q5E7G4 | 312309 |
| Q5E813 | 312309 |
| Q5F842 | 242231 |
| Q5FGC6 | 302409 |
| Q5FJS4 | 1579   |
| Q5FKR3 | 1579   |
| Q5FUT5 | 442    |
| Q5GSJ5 | 292805 |
| Q5HAA9 | 254945 |
| Q5HG27 | 93062  |
| Q5HG94 | 93062  |
| Q5HPE9 | 176279 |
| Q5HPL5 | 176279 |
| Q5HVI8 | 195099 |
| Q5JH52 | 311400 |
| Q5JK18 | 39947  |
| Q5KBM8 | 5207   |
| Q5KV06 | 1462   |
| Q5L0H5 | 1462   |
| Q5L5G6 | 83555  |
| Q5LBE0 | 272559 |
| Q5LHU9 | 272559 |
| Q5LP17 | 89184  |
| Q5M188 | 299768 |
| Q5M5S5 | 264199 |
| Q5N4N5 | 269084 |
| Q5NLY3 | 542    |
| Q5P8A6 | 76114  |
| Q5P9Z2 | 234826 |
| Q5QUY3 | 135577 |
| Q5SKV9 | 300852 |
| Q5UF02 | 295349 |
| Q5UZ62 | 2238   |
| Q5WV5  | 66692  |
| Q5WH57 | 66692  |
| Q5X4A6 | 297246 |
| Q5Z331 | 37329  |
| Q5ZUI7 | 272624 |

|        |        |
|--------|--------|
| Q60BS5 | 414    |
| Q62J41 | 13373  |
| Q636M6 | 288681 |
| Q63D00 | 288681 |
| Q63ST2 | 28450  |
| Q64CS2 | 290244 |
| Q64D96 | 285393 |
| Q64RT5 | 817    |
| Q64YV1 | 817    |
| Q65GF1 | 279010 |
| Q65JG8 | 279010 |
| Q65NE6 | 279010 |
| Q65S40 | 221988 |
| Q664W8 | 633    |
| Q67NS2 | 2734   |
| Q67P60 | 2734   |
| Q68VZ7 | 785    |
| Q6A5V8 | 1747   |
| Q6AGY4 | 59736  |
| Q6AR44 | 84980  |
| Q6BUX0 | 4959   |
| Q6C9F1 | 4952   |
| Q6CID1 | 28985  |
| Q6D020 | 29471  |
| Q6FCT3 | 62977  |
| Q6FPL5 | 5478   |
| Q6G0I0 | 803    |
| Q6G5K2 | 38323  |
| Q6G9G8 | 282459 |
| Q6G9N1 | 282459 |
| Q6GH15 | 282458 |
| Q6GH79 | 282458 |
| Q6KZ99 | 263820 |
| Q6LH77 | 74109  |
| Q6LM79 | 74109  |
| Q6LMU4 | 74109  |
| Q6LYH4 | 39152  |
| Q6MD60 | 264201 |
| Q6MQE3 | 959    |
| Q6MRF3 | 959    |
| Q6NC68 | 1076   |
| Q6NJW6 | 1717   |
| Q6SHD3 | 257390 |
| Q6SHR1 | 257386 |
| Q6YS32 | 39947  |
| Q6YS33 | 39947  |
| Q71X54 | 265669 |
| Q71ZN4 | 265669 |
| Q720J4 | 265669 |
| Q72AS8 | 882    |
| Q732S3 | 222523 |
| Q73A99 | 222523 |
| Q73GJ2 | 163164 |
| Q744N0 | 1770   |

|        |        |
|--------|--------|
| Q74C75 | 35554  |
| Q75AL3 | 33169  |
| Q76E53 | 17     |
| Q7A0Z4 | 196620 |
| Q7A5P9 | 158879 |
| Q7A5T7 | 158879 |
| Q7CLD9 | 632    |
| Q7M8C7 | 844    |
| Q7MHB2 | 196600 |
| Q7MHR7 | 196600 |
| Q7MT13 | 837    |
| Q7MZB3 | 141679 |
| Q7NJQ8 | 33072  |
| Q7NZA4 | 536    |
| Q7P9R4 | 272951 |
| Q7UA30 | 84588  |
| Q7UMB6 | 265606 |
| Q7UZL4 | 59919  |
| Q7V983 | 74547  |
| Q7V9M2 | 1219   |
| Q7VII7 | 32025  |
| Q7VLP7 | 730    |
| Q7VX91 | 520    |
| Q7W858 | 519    |
| Q7WLK6 | 518    |
| Q819Z8 | 226900 |
| Q81F53 | 226900 |
| Q81S62 | 1392   |
| Q81WN6 | 1392   |
| Q822G9 | 83557  |
| Q82EQ5 | 33903  |
| Q82T09 | 915    |
| Q838R7 | 1351   |
| Q83CQ7 | 777    |
| Q83FL3 | 203267 |
| Q83HB4 | 218496 |
| Q83IN8 | 623    |
| Q851Z6 | 39947  |
| Q852E4 | 39947  |
| Q87L96 | 670    |
| Q87LR4 | 670    |
| Q87NZ9 | 670    |
| Q88EI9 | 160488 |
| Q88UY8 | 1590   |
| Q88Y22 | 1590   |
| Q891L5 | 1513   |
| Q895J1 | 1513   |
| Q8A7Z9 | 818    |
| Q8CSM8 | 176280 |
| Q8CSQ3 | 176280 |
| Q8DC48 | 672    |
| Q8DCJ6 | 672    |
| Q8DHW0 | 197221 |
| Q8DR20 | 171101 |

|        |        |
|--------|--------|
| Q8DSM8 | 1309   |
| Q8EAC1 | 70863  |
| Q8EBS2 | 70863  |
| Q8EQ50 | 182710 |
| Q8EQT0 | 182710 |
| Q8F865 | 173    |
| Q8FB45 | 217992 |
| Q8FYK1 | 29461  |
| Q8G6Y6 | 216816 |
| Q8G6Y7 | 216816 |
| Q8GIQ5 | 159599 |
| Q8KG73 | 1097   |
| Q8KQ28 | 1901   |
| Q8KQ29 | 1901   |
| Q8NIW0 | 5141   |
| Q8NWS7 | 196620 |
| Q8PX05 | 2209   |
| Q8RA48 | 119072 |
| Q8RQN1 | 152794 |
| Q8RU02 | 406    |
| Q8TUD6 | 2214   |
| Q8TZ30 | 2320   |
| Q8U200 | 2261   |
| Q8U201 | 2261   |
| Q8XJS6 | 1502   |
| Q8Y073 | 305    |
| Q8Y4R0 | 1639   |
| Q8Y765 | 1639   |
| Q8Y7N9 | 1639   |
| Q8YJ97 | 29459  |
| Q8YR14 | 103690 |
| Q8ZUA3 | 13773  |
| Q928Q9 | 1642   |
| Q92BR9 | 1642   |
| Q92CH4 | 1642   |
| Q92GF9 | 781    |
| Q92MK3 | 382    |
| Q93C54 | 168810 |
| Q93C55 | 168810 |
| Q93C56 | 168810 |
| Q93C57 | 168810 |
| Q93TX4 | 41     |
| Q971Y7 | 111955 |
| Q97I43 | 1488   |
| Q97MC0 | 1488   |
| Q97SF8 | 1313   |
| Q97ZL7 | 2287   |
| Q98G91 | 381    |
| Q99U91 | 158878 |
| Q99UE9 | 158878 |
| Q9A9W8 | 155892 |
| Q9AE84 | 1913   |
| Q9AE85 | 1913   |
| Q9CB77 | 1769   |

|        |       |
|--------|-------|
| Q9CHJ1 | 1360  |
| Q9CM97 | 747   |
| Q9EV19 | 375   |
| Q9EV36 | 1280  |
| Q9EZA8 | 542   |
| Q9HL67 | 2303  |
| Q9HMV1 | 2242  |
| Q9K8B0 | 86665 |
| Q9KA90 | 86665 |
| Q9KCR9 | 86665 |
| Q9KLC4 | 666   |
| Q9KUH4 | 666   |
| Q9KUW8 | 666   |
| Q9LYU8 | 3702  |
| Q9PK32 | 83560 |
| Q9RQ24 | 33910 |
| Q9RQ25 | 33910 |
| Q9RUL9 | 1299  |
| Q9S702 | 3702  |
| Q9UZV5 | 29292 |
| Q9UZV6 | 29292 |
| Q9X1K6 | 2336  |
| Q9XAI7 | 1902  |
| Q9XHC5 | 3847  |
| Q9YCX2 | 56636 |
| Q9Z6L0 | 83558 |
| Q9ZCI7 | 782   |
| Q9ZJZ7 | 85963 |

**homoserine dehydrogenase**

| UniProt | TXID   |
|---------|--------|
| P31116  | 4932   |
| D6VWV8  | 559292 |
| C8ZBT8  | 643680 |
| C7GM73  | 574961 |
| B3LQM1  | 285006 |
| A6ZQ95  | 307796 |
| B5VLS9  | 545124 |
| C5DRI7  | 559307 |
| Q75DV3  | 33169  |
| Q6BN01  | 4959   |
| A3LRB1  | 4924   |
| A5DL31  | 4929   |
| A5DW64  | 36914  |
| C4QXA7  | 644223 |
| C4Y071  | 306902 |
| C9STI6  | 526221 |
| Q0UIN5  | 13684  |
| C7ZBU6  | 660122 |
| C7Z8D8  | 660122 |

**homoserine O-acetyltransferase**

| UniProt | TXID   |
|---------|--------|
| P08465  | 4932   |
| D6W0R8  | 559292 |
| C8ZGP5  | 643680 |
| C7GP87  | 574961 |
| B3LPB5  | 285006 |
| A6ZRG8  | 307796 |
| Q65C71  | 4931   |
| Q7ZA31  | 4931   |
| Q65C69  | 27292  |
| Q65C70  | 27292  |
| Q06736  | 27292  |
| Q65C68  | 230603 |
| Q6FNX4  | 5478   |
| C5DYZ8  | 559307 |
| B2G456  | 4956   |
| A7TF85  | 436907 |
| C5DK61  | 559295 |
| Q6CUV3  | 28985  |
| Q751Z3  | 33169  |

**cystathionine gamma-synthase**

| UniProt | TXID   |
|---------|--------|
| A1C3X3  | 5057   |
| A1CBW5  | 5057   |
| A1CG82  | 5057   |
| A1CJ22  | 5057   |
| A1D8F6  | 331117 |
| A1D936  | 331117 |
| A1DB44  | 331117 |
| A1DDE0  | 331117 |
| A2QA31  | 425011 |
| A2QIU2  | 425011 |
| A2QY34  | 425011 |
| A2QYG1  | 425011 |
| A2R8X8  | 425011 |
| A2Z702  | 39946  |
| A2Z703  | 39946  |
| A2Z705  | 39946  |
| A3LSH7  | 4924   |
| A3LTQ0  | 4924   |
| A3LX62  | 4924   |

|        |        |        |        |        |        |
|--------|--------|--------|--------|--------|--------|
| C7Z5E0 | 660122 | Q6C7H3 | 4952   | A4HMZ0 | 5660   |
| Q2GS85 | 38033  | C9W9H0 | 4905   | A4IBL4 | 5671   |
| D5GJK0 | 39416  | Q96UK3 | 5141   | A4QRH4 | 148305 |
| B8NT37 | 332952 | Q1K8F9 | 5141   | A4RMG5 | 148305 |
| B8N1N2 | 332952 | Q5MCQ5 | 5191   | A4RNB9 | 148305 |
| Q2UUX3 | 5062   | P12917 | 5191   | A4S2B4 | 436017 |
| Q2UKP9 | 5062   | Q5FY74 | 4922   | A4S3Y0 | 436017 |
| O94671 | 4896   | C4R960 | 644223 | A5DN62 | 4929   |
| B8M599 | 441959 | B2ASE7 | 5145   | A5DVE9 | 36914  |
| Q4WY36 | 5085   | C7YYD0 | 660122 | A5E6Z6 | 36914  |
| B0XXC0 | 451804 | Q2U8Z3 | 5062   | A6R1N2 | 339724 |
| B6Q4L3 | 441960 | Q9Y875 | 162425 | A6R497 | 339724 |
| Q5B998 | 162425 | C8VMS1 | 227321 | A6RIC4 | 332648 |
| C8VJA1 | 227321 | B8NDD4 | 332952 | A6S4T4 | 332648 |
| C5G7G1 | 559297 | Q0CAF3 | 341663 | A6SDV0 | 332648 |
| B6K3G8 | 402676 | A1CA53 | 5057   | A6ZLY2 | 307796 |
| B6H4I9 | 500485 | B8Y203 | 35717  | A6ZQ85 | 307796 |
| Q96VZ7 | 5207   | Q4WU51 | 5085   | A7A0F7 | 307796 |
| Q5KAD9 | 5207   | B0Y3M8 | 451804 | A7A0K2 | 307796 |
| A4S2Z7 | 436017 | A1DFA6 | 331117 | A7E8S4 | 665079 |
| B0DNV1 | 486041 | A4RKK0 | 148305 | A7EFY4 | 665079 |
| O63067 | 3847   | A3LR19 | 4924   | A7F083 | 665079 |
| B9IQ92 | 3694   | A2R9A0 | 425011 | A7TG47 | 436907 |
| A5APD8 | 29760  | Q2H2M9 | 38033  | A7TP41 | 436907 |
| C1MP14 | 564608 | B6Q1S6 | 441960 | A7WPD7 | 51657  |
| D7MG88 | 81972  | D1ZDE4 | 5147   | A8J355 | 3055   |
| D7KK95 | 81972  | B8MR86 | 441959 | A8NBT0 | 240176 |
| C5X893 | 4558   | C5JN63 | 559298 | A8PQX0 | 425265 |
| A9SKI1 | 145481 | Q0U2Y1 | 13684  | A9PID6 | 3694   |
| A9TAK5 | 145481 | C5GC66 | 559297 | A9S5H9 | 145481 |
| D3BT16 | 670386 | C0NQJ9 | 447093 | A9T1Q4 | 145481 |
| A1CKR4 | 5057   | C5FW90 | 554155 | B0DAR0 | 486041 |
| A1D6Q9 | 331117 | C6HSC8 | 544712 | B0DFR8 | 486041 |
| A2QDK6 | 425011 | A7EBN8 | 665079 | B0DR59 | 486041 |
| A4H4X1 | 5660   | B6HNU8 | 500485 | B0DR66 | 486041 |
| A4HT44 | 5671   | D4D3Z4 | 663202 | B0EJN7 | 370354 |
| A4RDD3 | 148305 | A6QVN0 | 339724 | B0ELR1 | 370354 |
| A6S8E9 | 332648 | Q6BN89 | 4959   | B0EN45 | 370354 |
| A7F9Z3 | 665079 | O60062 | 4896   | B0XZ86 | 451804 |
| A7TLG4 | 436907 | C5P7A4 | 222929 | B0Y277 | 451804 |
| A8DWA3 | 45351  | D4AKG0 | 663331 | B0YA29 | 451804 |
| A8NBZ4 | 240176 | C4JNA0 | 336963 | B0YBX6 | 451804 |
| A8Q3I6 | 425265 | B6JVI4 | 402676 | B1N417 | 5759   |
| B2AR90 | 5145   | B9WL30 | 573826 | B2AUC6 | 5145   |
| B9W745 | 573826 | A5DNC0 | 4929   | B2AYE2 | 5145   |
| C4JZ21 | 336963 | B0DA11 | 486041 | B2G4B3 | 4956   |

|        |        |        |        |        |        |
|--------|--------|--------|--------|--------|--------|
| C5DFS1 | 559295 | Q2HZ32 | 5480   | B2LXT6 | 162425 |
| C5MEY6 | 294747 | D5GD22 | 39416  | B2VLA4 | 515849 |
| Q4PDV5 | 5270   | Q5A948 | 5476   | B2VXP0 | 426418 |
| Q4QIR8 | 5664   | C1H1Y9 | 502779 | B2WCB8 | 426418 |
| Q5AIA2 | 5476   | A8N0C2 | 240176 | B3LLH3 | 285006 |
| Q6CAP2 | 4952   | A6STB1 | 332648 | B3LQL2 | 285006 |
| Q6CWI3 | 28985  | C1G658 | 502780 | B3LTC0 | 285006 |
| Q6FK85 | 5478   | C5M4B1 | 294747 | B3LUU9 | 285006 |
| Q7RZC2 | 5141   | Q5K8P2 | 5207   | B3MDE6 | 7217   |
| A0SXJ9 | 4932   | B2WIA3 | 426418 | B3NK88 | 7220   |
| A6QRK8 | 339724 | Q4P8Y8 | 5270   | B3S3W7 | 10228  |
| B2WEK6 | 426418 | C9S846 | 526221 | B4F935 | 4577   |
| C0NUY8 | 447093 | Q7LLJ3 | 5044   | B4FJ26 | 4577   |
| C4YF11 | 5476   | P39058 | 5044   | B4FNW6 | 4577   |
| C5JUC3 | 559298 | C0RXV2 | 482561 | B4HNZ0 | 7238   |
| C5P9N4 | 222929 | C1E6A7 | 296587 | B4P4B7 | 7245   |
| C6HRL1 | 544712 | C1DZ30 | 296587 | B4QD03 | 7240   |
| Q0CNN4 | 341663 | C4Y791 | 306902 | B5VDL1 | 545124 |
|        |        | C1N2Q8 | 564608 | B5VMP7 | 545124 |
|        |        | A5DRU6 | 36914  | B5VP46 | 545124 |
|        |        | D0NF03 | 403677 | B6HAD5 | 500485 |
|        |        | Q019D4 | 70448  | B6HEW5 | 500485 |
|        |        | A8Q4H2 | 425265 | B6HMV3 | 500485 |
|        |        | B7GCV4 | 556484 | B6K3B8 | 402676 |
|        |        | A1CAJ8 | 5057   | B6K8Y1 | 508771 |
|        |        | A1CNS2 | 5057   | B6QM86 | 441960 |
|        |        | A1D1N4 | 331117 | B6QTJ7 | 441960 |
|        |        | A1DEX1 | 331117 | B6QUU5 | 441960 |
|        |        | A2QB20 | 425011 | B7GC92 | 556484 |
|        |        | A3LRS6 | 4924   | B8AQ99 | 39946  |
|        |        | A4RAE8 | 148305 | B8B4G5 | 39946  |
|        |        | A5DRD9 | 4929   | B8CCE6 | 35128  |
|        |        | A5E1K9 | 36914  | B8LL39 | 3332   |
|        |        | A6S9Y5 | 332648 | B8MDX9 | 441959 |
|        |        | A7EDB6 | 665079 | B8MNR4 | 441959 |
|        |        | A7EQ10 | 665079 | B8N392 | 332952 |
|        |        | A7TBR2 | 45351  | B8N7B3 | 332952 |
|        |        | A8NX22 | 240176 | B8NK20 | 332952 |
|        |        | A8QBJ7 | 425265 | B8NV95 | 332952 |
|        |        | A9URI4 | 81824  | B8NYK4 | 332952 |
|        |        | A9V9I0 | 81824  | B9F8N9 | 39947  |
|        |        | B0CXX6 | 486041 | B9IK07 | 3694   |
|        |        | B2ATF5 | 5145   | B9PIG1 | 5811   |
|        |        | B6GW62 | 500485 | B9Q9E9 | 432359 |
|        |        | B6HRJ0 | 500485 | B9W7F1 | 573826 |
|        |        | B6KPP7 | 508771 | B9WMM0 | 573826 |

|        |        |        |        |
|--------|--------|--------|--------|
| B8CGK6 | 35128  | B9WMS1 | 573826 |
| B8MZD4 | 332952 | C0NB75 | 447093 |
| B8NKM7 | 332952 | C0NZA4 | 447093 |
| B9W9G2 | 573826 | C0S0K0 | 482561 |
| C3YTV6 | 7739   | C0SD44 | 482561 |
| C4JLJ3 | 336963 | C0Z354 | 3702   |
| C4JY13 | 336963 | C1EHF0 | 296587 |
| C4R0I1 | 644223 | C1GAS0 | 502780 |
| C4YC90 | 306902 | C1GF82 | 502780 |
| C5DHB5 | 559295 | C1H7U4 | 502779 |
| C5DPX0 | 559307 | C1HDT5 | 502779 |
| C5MBP3 | 294747 | C1MNK0 | 564608 |
| C8VET6 | 227321 | C4JJ69 | 336963 |
| C8VPZ5 | 227321 | C4JWP3 | 336963 |
| Q0U5T8 | 13684  | C4MAS9 | 5759   |
| Q0UEF0 | 13684  | C4QYL9 | 644223 |
| Q0V150 | 13684  | C4R1M9 | 644223 |
| Q10341 | 4896   | C4R3L3 | 644223 |
| Q2U6J5 | 5062   | C4Y2M1 | 306902 |
| Q2UQM7 | 5062   | C4Y8G1 | 306902 |
| Q4P1G6 | 5270   | C4YBC9 | 306902 |
| Q4WRR7 | 5085   | C4YEQ7 | 5476   |
| Q4WUI7 | 5085   | C5DFU1 | 559295 |
| Q55SA6 | 5207   | C5DG64 | 559295 |
| Q59TT5 | 5476   | C5DJ03 | 559295 |
| Q5KGQ3 | 5207   | C5DLF9 | 559295 |
| Q6CAU6 | 4952   | C5DRG8 | 559307 |
| Q6CJ47 | 28985  | C5DY28 | 559307 |
| Q757W0 | 33169  | C5DYT7 | 559307 |
| Q7SDK8 | 5141   | C5FSN0 | 554155 |
| A2QTP2 | 425011 | C5G096 | 554155 |
| A4QQH5 | 148305 | C5GQ38 | 559297 |
| A6QTK6 | 339724 | C5GR68 | 559297 |
| A6R0Z4 | 339724 | C5JR79 | 559298 |
| B0XN80 | 451804 | C5JRR5 | 559298 |
| B0Y412 | 451804 | C5KHB3 | 423536 |
| B2WHD7 | 426418 | C5KL47 | 423536 |
| B2WJG2 | 426418 | C5LFG5 | 423536 |
| B2WJM7 | 426418 | C5MAJ9 | 294747 |
| B6K6H3 | 402676 | C5ME56 | 294747 |
| B6QEF8 | 441960 | C5MIQ7 | 294747 |
| B8LWJ3 | 441959 | C5P1R8 | 222929 |
| B8MD92 | 441959 | C5PEF2 | 222929 |
| B9QIH4 | 432359 | C5WYM5 | 4558   |
| C0NQG2 | 447093 | C6H9G8 | 544712 |
| C0P0M1 | 447093 | C6HP80 | 544712 |



|        |        |        |        |
|--------|--------|--------|--------|
| C0S7T0 | 482561 | C7GM83 | 574961 |
| C0SFX7 | 482561 | C7GND7 | 574961 |
| C4YCP2 | 5476   | C7GPM2 | 574961 |
| C5FBM9 | 554155 | C7GW18 | 574961 |
| C5FH78 | 554155 | C7YHE2 | 660122 |
| C5GC45 | 559297 | C7YKF3 | 660122 |
| C5GJL0 | 559297 | C7YP17 | 660122 |
| C5JER7 | 559298 | C8VHB0 | 227321 |
| C5JN65 | 559298 | C8VRR3 | 227321 |
| C5P566 | 222929 | C8Z3L8 | 643680 |
| C5PAM2 | 222929 | C8ZBS8 | 643680 |
| C6HEZ1 | 544712 | C8ZCR8 | 643680 |
| C6HS94 | 544712 | C8ZEC2 | 643680 |
| C7YSW6 | 660122 | C9SXQ4 | 526221 |
| C7Z3S1 | 660122 | C9ZZ26 | 679716 |
| C9S9N2 | 526221 | D1ZTJ9 | 5147   |
| D4B0W4 | 663331 | D2V6M2 | 5762   |
| D4D358 | 663202 | D3BFM3 | 670386 |
| O13389 | 162425 | D4AVM8 | 663331 |
| Q0CKK2 | 341663 | D4B279 | 663331 |
| Q0CM27 | 341663 | D4DDM4 | 663202 |
| Q2KEH4 | 242507 | D4DEE8 | 663202 |
| Q5AT15 | 162425 | D5GJJ5 | 39416  |
| Q5BF05 | 162425 | D6VPK6 | 559292 |
| Q6BVG4 | 4959   | D6VWU8 | 559292 |
|        |        | D6VXV0 | 559292 |
|        |        | D6W0K0 | 559292 |
|        |        | D7LAJ0 | 81972  |
|        |        | O04981 | 4577   |
|        |        | O04982 | 4577   |
|        |        | O23944 | 57918  |
|        |        | O42851 | 4896   |
|        |        | O74314 | 4896   |
|        |        | O81334 | 3544   |
|        |        | O97121 | 7227   |
|        |        | P31373 | 4932   |
|        |        | P32929 | 9606   |
|        |        | P38675 | 5141   |
|        |        | P47164 | 4932   |
|        |        | P55217 | 3702   |
|        |        | Q012C1 | 70448  |
|        |        | Q04533 | 4932   |
|        |        | Q0C8C6 | 341663 |
|        |        | Q0CBE7 | 341663 |
|        |        | Q0CX10 | 341663 |
|        |        | Q0D1Y8 | 341663 |

|        |        |
|--------|--------|
| Q0GC25 | 3879   |
| Q0TXK2 | 13684  |
| Q0TZA5 | 13684  |
| Q10KP2 | 39947  |
| Q10KP3 | 39947  |
| Q10KP4 | 39947  |
| Q12198 | 4932   |
| Q2H5Y9 | 38033  |
| Q2HFS9 | 38033  |
| Q2HH43 | 38033  |
| Q2TYY9 | 5062   |
| Q2U2B2 | 5062   |
| Q2U598 | 5062   |
| Q2UBS4 | 5062   |
| Q2UJR0 | 5062   |
| Q38DH3 | 5691   |
| Q4DUG8 | 5693   |
| Q4FWE7 | 347515 |
| Q4P760 | 5270   |
| Q4WAK1 | 5085   |
| Q4WCI1 | 5085   |
| Q4WVZ1 | 5085   |
| Q4WWD8 | 5085   |
| Q55DV9 | 44689  |
| Q55V77 | 5207   |
| Q59VR0 | 5476   |
| Q59VV6 | 5476   |
| Q5A362 | 5476   |
| Q5A410 | 5476   |
| Q5ARD6 | 162425 |
| Q5B7M4 | 162425 |
| Q5BDD4 | 162425 |
| Q5BFJ9 | 162425 |
| Q5KL05 | 5207   |
| Q5RFI1 | 9601   |
| Q60HG7 | 9541   |
| Q6BSE9 | 4959   |
| Q6BTV4 | 4959   |
| Q6BZI1 | 4959   |
| Q6BZJ6 | 4959   |
| Q6C2Q9 | 4952   |
| Q6C8S4 | 4952   |
| Q6CB42 | 4952   |
| Q6CKV1 | 28985  |
| Q6CMC4 | 28985  |
| Q6CWG2 | 28985  |

|        |       |
|--------|-------|
| Q6FK75 | 5478  |
| Q6FR34 | 5478  |
| Q6FRS2 | 5478  |
| Q6R8F6 | 4081  |
| Q756K4 | 33169 |
| Q756W2 | 33169 |
| Q758U3 | 33169 |
| Q7JXZ2 | 7227  |
| Q7QHF8 | 7165  |
| Q86D27 | 5759  |
| Q86D28 | 5759  |
| Q86ZL4 | 5145  |
| Q8S7G4 | 4530  |
| Q9C816 | 3702  |
| Q9C876 | 3702  |
| Q9MT29 | 4113  |
| Q9MT30 | 4113  |
| Q9P417 | 5044  |
| Q9SPT6 | 4113  |
| Q9XFG0 | 3847  |
| Q9ZPL5 | 4097  |

| cystathionine beta-lyase |        | 5-methyltetrahydropteroyltriglutamate--<br>homocysteine methyltransferase |        | O-acetylhomoserine<br>(thiol)-lyase |        |
|--------------------------|--------|---------------------------------------------------------------------------|--------|-------------------------------------|--------|
| UniProt                  | TXID   | UniProt                                                                   | TXID   | UniProt                             | TXID   |
| A1C977                   | 5057   | A1CH47                                                                    | 5057   | P06106                              | 4932   |
| A1CBW5                   | 5057   | A1CXP1                                                                    | 331117 | D6VYU6                              | 559292 |
| A1CG82                   | 5057   | A2ZMX3                                                                    | 39946  | C8ZDR6                              | 643680 |
| A1D936                   | 331117 | A3LVA0                                                                    | 4924   | B5VVK3                              | 545124 |
| A1D9N1                   | 331117 | A4HIW5                                                                    | 5660   | A7A1I7                              | 307796 |
| A1DDE0                   | 331117 | A4I695                                                                    | 5671   | B3RHI1                              | 285006 |
| A2QIU2                   | 425011 | A4QPX4                                                                    | 148305 | C7GVT7                              | 574961 |
| A2QYG1                   | 425011 | A4R296                                                                    | 148305 | A7TLB1                              | 436907 |
| A2R2J2                   | 425011 | A5AAM9                                                                    | 425011 | Q6FVR1                              | 5478   |
| A3LMX1                   | 4924   | A5BSS2                                                                    | 29760  | Q92441                              | 28985  |
| A3LTQ0                   | 4924   | A5C7K7                                                                    | 29760  | C5DGA4                              | 559295 |
| A4DA77                   | 5085   | A5DFQ0                                                                    | 4929   | C5E1M5                              | 559307 |
| A4H7K6                   | 5660   | A5DS66                                                                    | 36914  | Q75AE8                              | 33169  |
| A4HKQ5                   | 5660   | A6R7F7                                                                    | 339724 | C4XWE8                              | 306902 |
| A4HVV9                   | 5671   | A6SHK9                                                                    | 332648 | Q6BME7                              | 4959   |
| A4I885                   | 5671   | A6YGE7                                                                    | 3649   | C5M1S7                              | 294747 |
| A4RHJ5                   | 148305 | A6ZR47                                                                    | 307796 | B9WF95                              | 573826 |
| A4S2R2                   | 436017 | A7F002                                                                    | 665079 | Q9UVM2                              | 5476   |
| A5DFM4                   | 4929   | A7RIK3                                                                    | 45351  | Q9UR58                              | 5476   |
| A5DV17                   | 36914  | A7T6T8                                                                    | 45351  | Q59US5                              | 5476   |
| A6R497                   | 339724 | A7TMV4                                                                    | 436907 | A3LST3                              | 4924   |
| A6REG4                   | 339724 | A8NXT9                                                                    | 240176 | C4R7J7                              | 644223 |

|        |        |        |        |        |        |
|--------|--------|--------|--------|--------|--------|
| A6RIC4 | 332648 | A8PX29 | 425265 | A5E3W7 | 36914  |
| A6RQY9 | 332648 | A9P805 | 3694   | Q9C123 | 4922   |
| A6ZU04 | 307796 | A9PBM8 | 3694   | A5DDM8 | 4929   |
| A7A294 | 307796 | A9PBU6 | 3694   | Q6C7U9 | 4952   |
| A7EFY4 | 665079 | A9PII3 | 3694   | Q2GNW9 | 38033  |
| A7EX64 | 665079 | A9RT52 | 145481 | C5P7U2 | 222929 |
| A7YVL5 | 4905   | A9RWS2 | 145481 | C4JMM4 | 336963 |
| A8CEI3 | 3866   | A9U0A5 | 145481 | Q9P3D4 | 5141   |
| A8JB47 | 3055   | A9U742 | 145481 | Q1K4Z1 | 5141   |
| A8NU12 | 240176 | B0CPI5 | 486041 | B6GZ70 | 500485 |
| A9SF32 | 145481 | B0CYJ4 | 486041 | B6HWB3 | 500485 |
| B0Y277 | 451804 | B0Y5S8 | 451804 | A2QUT4 | 425011 |
| B0YBX6 | 451804 | B2AF53 | 5145   | D5GKD1 | 39416  |
| B0YEG1 | 451804 | B2AWS2 | 5145   | B2B0Q4 | 5145   |
| B2B313 | 5145   | B2VQE0 | 46066  | C5JTC9 | 559298 |
| B2WMP8 | 426418 | B2W1D5 | 426418 | A8Q079 | 425265 |
| B3LUR6 | 285006 | B3LRK9 | 285006 | P50125 | 162425 |
| B4FU01 | 4577   | B4G1T4 | 4577   | C8V3P9 | 227321 |
| B4FXS6 | 4577   | B6HV10 | 500485 | C1GM15 | 502780 |
| B5VI80 | 545124 | B6K226 | 402676 | C1HBF9 | 502779 |
| B6H390 | 500485 | B6QFW8 | 441960 | Q2U9X2 | 5062   |
| B6HAD5 | 500485 | B6UF55 | 4577   | B8NRD7 | 332952 |
| B6HMV3 | 500485 | B8A1R8 | 4577   | C0SI30 | 482561 |
| B6K4V7 | 402676 | B8BN41 | 39946  | B2W2J7 | 426418 |
| B6QGC7 | 441960 | B8LKF4 | 3332   | A1C4R2 | 5057   |
| B6QUU5 | 441960 | B8LPY2 | 3332   | C7F7S7 | 42251  |
| B8MDQ7 | 441959 | B8LQU7 | 3332   | O13326 | 4896   |
| B8MDQ8 | 441959 | B8M9S4 | 441959 | B0DT91 | 486041 |
| B8N7B3 | 332952 | B8N9V1 | 332952 | A4RHY9 | 148305 |
| B8NCS0 | 332952 | B9HQI3 | 3694   | B6QHT5 | 441960 |
| B8NK20 | 332952 | B9I615 | 3694   | B6K2Z3 | 402676 |
| B9DGA0 | 3702   | B9IPT1 | 3694   | A6R9L3 | 339724 |
| B9FRT6 | 39947  | B9MYM2 | 3694   | Q0V2F1 | 13684  |
| B9NJ56 | 3694   | B9PD83 | 3694   | A8P274 | 240176 |
| B9RGV9 | 3988   | B9RQ33 | 3988   | A6S2U3 | 332648 |
| B9WA95 | 573826 | B9SI90 | 3988   | D1ZA82 | 5147   |
| C0NB75 | 447093 | B9WKZ1 | 573826 | B8MIN1 | 441959 |
| C0NVJ3 | 447093 | C0NIW4 | 447093 | C7YWL1 | 660122 |
| C0S0K0 | 482561 | C0P5Y3 | 4577   | Q4WEU7 | 5085   |
| C0SJG2 | 482561 | C0SIT3 | 482561 | B0Y332 | 451804 |
| C1EH62 | 296587 | C1GLT7 | 502780 | A7EEJ4 | 665079 |
| C1GAS0 | 502780 | C1HAH2 | 502779 | Q4P2T2 | 5270   |
| C1GN02 | 502780 | C3TS12 | 3827   | C0P079 | 447093 |
| C1H7U4 | 502779 | C3ZTE9 | 7739   | A4S765 | 436017 |
| C1HCB4 | 502779 | C4JJV3 | 336963 | A1CZP1 | 331117 |
| C4JH93 | 336963 | C4QZU2 | 644223 | C1EIP1 | 296587 |

|        |        |        |        |        |        |
|--------|--------|--------|--------|--------|--------|
| C4JJ69 | 336963 | C4XWS2 | 306902 | Q00VC8 | 70448  |
| C4R0F4 | 644223 | C4YKZ8 | 5476   | D4ARJ4 | 663331 |
| C4XXW4 | 306902 | C5DE81 | 559295 | D4DLR3 | 663202 |
| C5DG64 | 559295 | C5DQU3 | 559307 | C1N079 | 564608 |
| C5DHS0 | 559295 | C5FEZ0 | 554155 | C7ZGA9 | 660122 |
| C5E197 | 559307 | C5GE72 | 559297 | C7ZGU9 | 660122 |
| C5FG62 | 554155 | C5JJ61 | 559298 | C9SCV3 | 526221 |
| C5FSN0 | 554155 | C5M4D8 | 294747 | Q0CE96 | 341663 |
| C5GQ38 | 559297 | C5P8V3 | 222929 | Q0UQZ1 | 13684  |
| C5GRM3 | 559297 | C6H889 | 544712 | B8BHC6 | 39946  |
| C5JRR5 | 559298 | C7GRS4 | 574961 | C1EFZ8 | 296587 |
| C5JX53 | 559298 | C7Z0Z4 | 660122 | C4YI55 | 5476   |
| C5KH60 | 423536 | C8Z7A8 | 643680 |        |        |
| C5M5H9 | 294747 | C9SLY5 | 526221 |        |        |
| C5P1R8 | 222929 | C9ZV24 | 679716 |        |        |
| C5P3Y5 | 222929 | D3DLZ8 | 559292 |        |        |
| C5Z5C5 | 4558   | D4AZF7 | 663331 |        |        |
| C6H9G8 | 544712 | D4D8Y9 | 663202 |        |        |
| C6HHA1 | 544712 | D5A7T4 | 3332   |        |        |
| C6TAH0 | 3847   | D5GAV4 | 39416  |        |        |
| C6TG29 | 3847   | D7L198 | 81972  |        |        |
| C7GX10 | 574961 | D7LXP0 | 81972  |        |        |
| C7GYF8 | 574961 | D7M065 | 81972  |        |        |
| C7YHE2 | 660122 | O50008 | 3702   |        |        |
| C7ZPP7 | 660122 | P05694 | 4932   |        |        |
| C8VB52 | 227321 | P82610 | 5476   |        |        |
| C8VRR3 | 227321 | P93263 | 3544   |        |        |
| C8Z7Z2 | 643680 | Q069K2 | 200320 |        |        |
| C8Z868 | 643680 | Q0CLG2 | 341663 |        |        |
| C9SJ68 | 526221 | Q0U9I2 | 13684  |        |        |
| D0NLW7 | 403677 | Q0UTW0 | 13684  |        |        |
| D1ZFS7 | 5147   | Q0WNZ5 | 3702   |        |        |
| D3BFM3 | 670386 | Q27JJ6 | 4932   |        |        |
| D4AVM8 | 663331 | Q27JK0 | 4932   |        |        |
| D4B502 | 663331 | Q2GPU2 | 38033  |        |        |
| D4D1Q8 | 663202 | Q2H923 | 38033  |        |        |
| D4DDM4 | 663202 | Q2QLY4 | 39947  |        |        |
| D5GE29 | 39416  | Q2QLY5 | 39947  |        |        |
| D6VTT7 | 559292 | Q2UGH7 | 5062   |        |        |
| D6VTX0 | 559292 | Q42662 | 4142   |        |        |
| D7FL39 | 2880   | Q42699 | 4058   |        |        |
| D7LVN0 | 81972  | Q4H1G2 | 161934 |        |        |
| O94350 | 4896   | Q4LB12 | 4513   |        |        |
| P43623 | 4932   | Q4LB13 | 4513   |        |        |
| P53101 | 4932   | Q4P6X9 | 5270   |        |        |
| P53780 | 3702   | Q4PG29 | 5270   |        |        |

|        |        |        |        |
|--------|--------|--------|--------|
| Q011L0 | 70448  | Q4Q6R3 | 5664   |
| Q0C8C6 | 341663 | Q4WNY2 | 5085   |
| Q0CVN8 | 341663 | Q54X49 | 44689  |
| Q0CX10 | 341663 | Q57XC8 | 5691   |
| Q0U3T3 | 13684  | Q5B4T7 | 162425 |
| Q12607 | 162425 | Q5EMU4 | 148305 |
| Q2H105 | 38033  | Q5K9D7 | 5207   |
| Q2U0S6 | 5062   | Q6BCT3 | 4513   |
| Q2U2B2 | 5062   | Q6BYS1 | 4959   |
| Q2UBS4 | 5062   | Q6C638 | 4952   |
| Q3EAI6 | 3702   | Q6CMI0 | 28985  |
| Q4P317 | 5270   | Q6FQM7 | 5478   |
| Q4Q511 | 5664   | Q6GYJ7 | 4922   |
| Q4QFT8 | 5664   | Q6KCR0 | 3702   |
| Q4WAK1 | 5085   | Q6KCR2 | 3702   |
| Q4WVZ1 | 5085   | Q71EW8 | 3847   |
| Q55DV9 | 44689  | Q75D10 | 33169  |
| Q5ACX5 | 5476   | Q7S0I6 | 5141   |
| Q5AXC9 | 162425 | Q8H162 | 3702   |
| Q5BFJ9 | 162425 | Q8W0Q7 | 4558   |
| Q5K9J3 | 5207   | Q8X1E4 | 5141   |
| Q5K9J4 | 5207   | Q93ZK3 | 3702   |
| Q6BYU9 | 4959   | Q94BN4 | 3702   |
| Q6BZI1 | 4959   | Q9LM03 | 4113   |
| Q6BZJ6 | 4959   | Q9P444 | 162425 |
| Q6CAR4 | 4952   | Q9P8N9 | 5499   |
| Q6CSX8 | 28985  | Q9SRV5 | 3702   |
| Q6FL54 | 5478   | Q9UT19 | 4896   |
| Q756K4 | 33169  |        |        |
| Q75CH8 | 33169  |        |        |
| Q96VU8 | 5141   |        |        |
| Q9LWJ2 | 39947  |        |        |
| Q9LWJ5 | 39947  |        |        |
| Q9MT31 | 4113   |        |        |
| Q9UV02 | 40559  |        |        |

**cystathionine gamma-lyase**

| UniProt | TXID   |
|---------|--------|
| P31373  | 4932   |
| D6VPK6  | 559292 |
| C8Z3L8  | 643680 |
| C7GPM2  | 574961 |
| B5VDL1  | 545124 |
| B3LUU9  | 285006 |
| A7A0F7  | 307796 |
| Q6FRS2  | 5478   |

**homocysteine S-methyltransferase**

| UniProt | TXID  |
|---------|-------|
| Q8LAX0  | 3702  |
| D7L2F0  | 81972 |
| B9RTM3  | 3988  |
| B9HUS6  | 3694  |
| B9HK01  | 3694  |
| C6THI2  | 3847  |
| C6TCM1  | 3847  |
| Q0TXM4  | 13684 |

**betaine-homocysteine methyltransferase**

| UniProt | TXID  |
|---------|-------|
| Q93088  | 9606  |
| Q5RFG2  | 9601  |
| O35490  | 10090 |
| A2ALP9  | 10090 |
| Q5I597  | 9913  |
| O09171  | 10116 |
| Q5M8Z0  | 8364  |
| Q5XGM3  | 8355  |

|        |        |        |        |        |        |
|--------|--------|--------|--------|--------|--------|
| A7TP41 | 436907 | D3TPQ2 | 37546  | Q32LQ4 | 7955   |
| Q6CKV1 | 28985  | D3TRN2 | 37546  | B5DGE7 | 8030   |
| Q758U3 | 33169  | B4MZM7 | 7260   | A7XLV2 | 8167   |
| C5DVD2 | 559307 | B4MZM6 | 7260   | A2TF10 | 8255   |
| C5DG64 | 559295 | Q29LT6 | 46245  | Q1KMD2 | 8175   |
| C5MAJ9 | 294747 | Q29LT7 | 46245  | A7RLS1 | 45351  |
| B9WMM0 | 573826 | B4G7F6 | 7234   | C3KIA2 | 229290 |
| A5E0C2 | 36914  | B4G7F5 | 7234   | B3RR62 | 10228  |
| Q6BTV4 | 4959   | B4Q902 | 7240   | B3RR63 | 10228  |
| Q5A362 | 5476   | B4Q903 | 7240   | C3Y1N2 | 7739   |
| A3LSH7 | 4924   | B4JBY2 | 7222   | B7P2U0 | 6945   |
| C4Y2M1 | 306902 | B4JBY1 | 7222   | A7RIN5 | 45351  |
| Q6C2Q9 | 4952   | A2R696 | 425011 | B2RCQ6 | 9606   |
| B2WCB8 | 426418 | A3LQC9 | 4924   | B2RDF4 | 9606   |
| D5GM51 | 39416  | A4R5G4 | 148305 | B4DPF0 | 9606   |
| Q2TTY9 | 5062   | A8KB71 | 7955   | B7Z516 | 9606   |
| B8NYK4 | 332952 | A8WG15 | 7955   | C3YKD9 | 7739   |
| A4RNB9 | 148305 | B3S7K9 | 10228  | C3YKZ2 | 7739   |
| C5GU28 | 559297 | B6KB25 | 508771 | C3YN42 | 7739   |
| A2R8X8 | 425011 | B9H8B8 | 3694   | C3ZZV0 | 7739   |
| C1H272 | 502779 | B9HWH8 | 3694   | Q3UEP0 | 10090  |
| C5JP51 | 559298 | C3ZEE1 | 7739   | Q5RF32 | 9601   |
| C1G5K1 | 502780 | C8VHP4 | 227321 | Q68FT5 | 10116  |
| C0NFW6 | 447093 | D6WLX1 | 7070   | Q91WS4 | 10090  |
| Q0D1Y8 | 341663 | Q10PU4 | 39947  | Q9H2M3 | 9606   |
| A1C3X3 | 5057   | Q22HI1 | 312017 |        |        |
| C8VM61 | 227321 | Q2TXK9 | 5062   |        |        |
| B2LXT6 | 162425 | Q4CP82 | 5693   |        |        |
| Q5BDD4 | 162425 | Q4DI99 | 5693   |        |        |
| B6HHI9 | 500485 | Q4GZ92 | 5691   |        |        |
| A1DB44 | 331117 | Q4PDM6 | 5270   |        |        |
| B8MDX9 | 441959 | Q4Q0C9 | 5664   |        |        |
| A6S4T4 | 332648 | Q4WE23 | 5085   |        |        |
| C5P2T0 | 222929 | Q5KA93 | 5207   |        |        |
| Q4WC11 | 5085   | Q5ZBZ6 | 39947  |        |        |
| B0YA29 | 451804 | Q6C0D6 | 4952   |        |        |
| A7E8S4 | 665079 | Q6PBE1 | 8364   |        |        |
| B2AYE2 | 5145   | Q753B4 | 33169  |        |        |
| B6QM86 | 441960 | Q7SFT2 | 5141   |        |        |
| C4JIG7 | 336963 | Q7XEH2 | 39947  |        |        |
| C7YKF3 | 660122 | Q9M1W4 | 3702   |        |        |
| C5FX28 | 554155 | Q9SDL7 | 3702   |        |        |
| C4QYL9 | 644223 | A1C5J4 | 5057   |        |        |
| D1ZJF8 | 5147   | A1D0G5 | 331117 |        |        |
| Q96VU7 | 5141   | A2Z7F0 | 39946  |        |        |
| Q0TZA5 | 13684  | A2ZMI7 | 39946  |        |        |

|        |        |        |        |
|--------|--------|--------|--------|
| Q2HFS9 | 38033  | A4HQE8 | 5660   |
| Q9P417 | 5044   | A4IE37 | 5671   |
| C0RXA9 | 482561 | A4ZGQ8 | 36774  |
| C6HL43 | 544712 | A9RGI7 | 145481 |
| D4AQG6 | 663331 | A9RI39 | 145481 |
| C3YTG3 | 7739   | A9SFD6 | 145481 |
| D1FNY6 | 168717 | B0WAH1 | 7176   |
| D2V6M2 | 5762   | B0WQ03 | 7176   |
| Q55DV9 | 44689  | B0Y1P6 | 451804 |
| B5X1V6 | 8030   | B2AAZ0 | 5145   |
| Q4PG01 | 5270   | B3MPE3 | 7217   |
| Q6P849 | 8364   | B3NL78 | 7220   |
| A9Z022 | 8022   | B4FK22 | 4577   |
| D3BFM3 | 670386 | B4I5M7 | 7238   |
| A6QZA3 | 339724 | B4KJP9 | 7230   |
| A7S143 | 45351  | B4LSJ7 | 7244   |
| Q640H4 | 8355   | B4PAD4 | 7245   |
| Q6NWE3 | 7955   | B5X0U2 | 8030   |
| Q6PHI6 | 7955   | B6HVM8 | 500485 |
| Q68EI1 | 7955   | B6TK96 | 4577   |
| C3KJ67 | 229290 | B6TYG7 | 4577   |
| Q4SDU9 | 99883  | B8A042 | 4577   |
| B0DR66 | 486041 | B8AA61 | 39946  |
| B0DR59 | 486041 | B8AQV5 | 39946  |
| B0DFR8 | 486041 | B8NVJ1 | 332952 |
| Q60HG7 | 9541   | B9GSK5 | 3694   |
| Q19QT7 | 9823   | B9PL90 | 5811   |
| B8P570 | 561896 | B9QBQ1 | 432359 |
| Q9EQS4 | 10116  | B9SFH3 | 3988   |
| D3ZQX6 | 10116  | B9T060 | 3988   |
| P18757 | 10116  | C0PRQ1 | 3332   |
| Q17DR0 | 7159   | C5P4X0 | 222929 |
| Q17DR1 | 7159   | C5WSP6 | 4558   |
| D3Z570 | 10090  | C5XLK6 | 4558   |
| Q8VCN5 | 10090  | C5YRH9 | 4558   |
| B3S3W7 | 10228  | C7YSG1 | 660122 |
| B3S3V3 | 10228  | C8CGW4 | 668559 |
| A0BJI2 | 5888   | C8CGW5 | 668558 |
| A0E9Q1 | 5888   | C8CGW6 | 90165  |
| A0D3Z7 | 5888   | C8CGW7 | 668556 |
| Q7QHF8 | 7165   | C8CGW8 | 668557 |
| D0NAM5 | 403677 | C9ZI75 | 679716 |
| Q7JXZ2 | 7227   | D1ZZE7 | 7070   |
| O97121 | 7227   | D7LQW5 | 81972  |
| B7GAW0 | 556484 | D7LTP3 | 81972  |
| B3NK88 | 7220   | P56707 | 20406  |



|        |        |        |        |
|--------|--------|--------|--------|
| P32929 | 9606   | Q0CYN5 | 341663 |
| B4E1R2 | 9606   | Q0WTD0 | 3702   |
| B0W7Q2 | 7176   | Q17C46 | 7159   |
| B0WHB0 | 7176   | Q1HL00 | 4442   |
| B4P4B7 | 7245   | Q2F5Q8 | 7091   |
| B0JYP8 | 9913   | Q2QME6 | 39947  |
| Q58DW2 | 9913   | Q2QME7 | 39947  |
| Q2F6B7 | 7091   | Q2QME8 | 39947  |
| D6X383 | 7070   | Q3EAF5 | 3702   |
| B3MDE6 | 7217   | Q3EB03 | 3702   |
| B4HNZ0 | 7238   | Q4VNK0 | 36774  |
| B4QD03 | 7240   | Q5B7V2 | 162425 |
| B4MG50 | 7244   | Q8H825 | 39947  |
| B4M0Z9 | 7244   | Q8MQN1 | 7227   |
| B4JPP3 | 7222   | Q9FUM7 | 4577   |
| Q5RFI1 | 9601   | Q9FUM8 | 4577   |
| D3TMY0 | 37546  | Q9FUM9 | 4577   |
| A8WLD9 | 6238   | Q9FUN0 | 4577   |
| Q23CV0 | 312017 | Q9VJ32 | 7227   |
| B4MP07 | 7260   |        |        |
| B4N4K0 | 7260   |        |        |
| P55216 | 6239   |        |        |
| O45391 | 6239   |        |        |
| C4WW23 | 7029   |        |        |
| C4WW93 | 7029   |        |        |
| C1C2T8 | 344056 |        |        |
| A9VCT5 | 81824  |        |        |
| C9SMM7 | 526221 |        |        |
| A2QA31 | 425011 |        |        |
| A2QY34 | 425011 |        |        |
| A3LTQ0 | 4924   |        |        |
| A3LX62 | 4924   |        |        |
| A4QRH4 | 148305 |        |        |
| A4S2B4 | 436017 |        |        |
| A4S3Y0 | 436017 |        |        |
| A5DVE9 | 36914  |        |        |
| A7F083 | 665079 |        |        |
| A8J355 | 3055   |        |        |
| A9S5H9 | 145481 |        |        |
| B2VLA4 | 515849 |        |        |
| B6HEW5 | 500485 |        |        |
| B7GC92 | 556484 |        |        |
| B9IK07 | 3694   |        |        |
| B9W7F1 | 573826 |        |        |
| C4MAS9 | 5759   |        |        |
| C4R1M9 | 644223 |        |        |

|        |        |
|--------|--------|
| D6VWU8 | 559292 |
| D6VXV0 | 559292 |
| D6W0K0 | 559292 |
| O42851 | 4896   |
| O74314 | 4896   |
| P38675 | 5141   |
| P55217 | 3702   |
| Q2U598 | 5062   |
| Q2UJR0 | 5062   |
| Q4FWE7 | 347515 |
| Q4P760 | 5270   |
| Q4WWD8 | 5085   |
| Q59VR0 | 5476   |
| Q5A410 | 5476   |
| Q5B7M4 | 162425 |
| Q5KL05 | 5207   |
| Q6C8S4 | 4952   |
| Q6CB42 | 4952   |
| Q6CMC4 | 28985  |
| Q6CWG2 | 28985  |
| Q6FK75 | 5478   |
| Q6FR34 | 5478   |
| Q756W2 | 33169  |
| Q86D27 | 5759   |
| A1CBW5 | 5057   |
| A1CG82 | 5057   |
| A1CJ22 | 5057   |
| A1D8F6 | 331117 |
| A1D936 | 331117 |
| A1DDE0 | 331117 |
| A2QIU2 | 425011 |
| A2QYG1 | 425011 |
| A4HMZ0 | 5660   |
| A4IBL4 | 5671   |
| A4RMG5 | 148305 |
| A5DN62 | 4929   |
| A5E6Z6 | 36914  |
| A6R1N2 | 339724 |
| A6R497 | 339724 |
| A6RIC4 | 332648 |
| A6SDV0 | 332648 |
| A6ZLY2 | 307796 |
| A6ZQ85 | 307796 |
| A7A0K2 | 307796 |
| A7EFY4 | 665079 |
| A7TG47 | 436907 |

|        |        |
|--------|--------|
| A7WPD7 | 51657  |
| A9PID6 | 3694   |
| A9T1Q4 | 145481 |
| B0DAR0 | 486041 |
| B0EJN7 | 370354 |
| B0ELR1 | 370354 |
| B0EN45 | 370354 |
| B0XZ86 | 451804 |
| B0Y277 | 451804 |
| B0YBX6 | 451804 |
| B1N417 | 5759   |
| B2AUC6 | 5145   |
| B2G4B3 | 4956   |
| B3LLH3 | 285006 |
| B3LQL2 | 285006 |
| B3LTC0 | 285006 |
| B4F935 | 4577   |
| B4FJ26 | 4577   |
| B4FNW6 | 4577   |
| B5VMP7 | 545124 |
| B5VP46 | 545124 |
| B6HAD5 | 500485 |
| B6HMV3 | 500485 |
| B6K3B8 | 402676 |
| B6K8Y1 | 508771 |
| B6QTJ7 | 441960 |
| B6QUU5 | 441960 |
| B8AQ99 | 39946  |
| B8CCE6 | 35128  |
| B8LL39 | 3332   |
| B8MNR4 | 441959 |
| B8N392 | 332952 |
| B8N7B3 | 332952 |
| B8NK20 | 332952 |
| B8NV95 | 332952 |
| B9F8N9 | 39947  |
| B9PIG1 | 5811   |
| B9Q9E9 | 432359 |
| B9WMS1 | 573826 |
| C0NB75 | 447093 |
| C0NZA4 | 447093 |
| C0S0K0 | 482561 |
| C0SD44 | 482561 |
| C0Z354 | 3702   |
| C1EHF0 | 296587 |
| C1GAS0 | 502780 |

|        |        |
|--------|--------|
| C1GF82 | 502780 |
| C1H7U4 | 502779 |
| C1HDT5 | 502779 |
| C1MNK0 | 564608 |
| C4JJ69 | 336963 |
| C4JWP3 | 336963 |
| C4R3L3 | 644223 |
| C4Y8G1 | 306902 |
| C4YBC9 | 306902 |
| C4YEQ7 | 5476   |
| C5DFU1 | 559295 |
| C5DJ03 | 559295 |
| C5DLF9 | 559295 |
| C5DRG8 | 559307 |
| C5DY28 | 559307 |
| C5DYT7 | 559307 |
| C5FSN0 | 554155 |
| C5G096 | 554155 |
| C5GQ38 | 559297 |
| C5GR68 | 559297 |
| C5JR79 | 559298 |
| C5JRR5 | 559298 |
| C5KHB3 | 423536 |
| C5KL47 | 423536 |
| C5LFG5 | 423536 |
| C5ME56 | 294747 |
| C5MIQ7 | 294747 |
| C5P1R8 | 222929 |
| C5PEF2 | 222929 |
| C5WYM5 | 4558   |
| C6H9G8 | 544712 |
| C6HP80 | 544712 |
| C7GM83 | 574961 |
| C7GND7 | 574961 |
| C7GW18 | 574961 |
| C7YHE2 | 660122 |
| C7YP17 | 660122 |
| C8VRR3 | 227321 |
| C8ZBS8 | 643680 |
| C8ZCR8 | 643680 |
| C8ZEC2 | 643680 |
| C9SXQ4 | 526221 |
| C9ZZ26 | 679716 |
| D4AVM8 | 663331 |
| D4B279 | 663331 |
| D4DDM4 | 663202 |

|        |        |
|--------|--------|
| D4DEE8 | 663202 |
| D5GJJ5 | 39416  |
| D7LAJ0 | 81972  |
| O04981 | 4577   |
| O04982 | 4577   |
| O23944 | 57918  |
| O81334 | 3544   |
| P47164 | 4932   |
| Q012C1 | 70448  |
| Q04533 | 4932   |
| Q0C8C6 | 341663 |
| Q0CX10 | 341663 |
| Q0GC25 | 3879   |
| Q0TXK2 | 13684  |
| Q10KP2 | 39947  |
| Q10KP3 | 39947  |
| Q10KP4 | 39947  |
| Q12198 | 4932   |
| Q2H5Y9 | 38033  |
| Q2HH43 | 38033  |
| Q2U2B2 | 5062   |
| Q2UBS4 | 5062   |
| Q38DH3 | 5691   |
| Q4DUG8 | 5693   |
| Q4WAK1 | 5085   |
| Q4WVZ1 | 5085   |
| Q55V77 | 5207   |
| Q59VV6 | 5476   |
| Q5ARD6 | 162425 |
| Q5BFJ9 | 162425 |
| Q6BSE9 | 4959   |
| Q6BZI1 | 4959   |
| Q6BZJ6 | 4959   |
| Q6R8F6 | 4081   |
| Q756K4 | 33169  |
| Q86D28 | 5759   |
| Q86ZL4 | 5145   |
| Q8S7G4 | 4530   |
| Q9C816 | 3702   |
| Q9C876 | 3702   |
| Q9MT29 | 4113   |
| Q9MT30 | 4113   |
| Q9SPT6 | 4113   |
| Q9XFG0 | 3847   |
| Q9ZPL5 | 4097   |
| A5JYW2 | 6239   |

|        |       |
|--------|-------|
| C4QJR9 | 6183  |
| Q5K6Y9 | 5207  |
| A2FEV4 | 5722  |
| B1X4E2 | 39717 |
| B4HBA6 | 7234  |
| B4KJJ5 | 7230  |
| B5DS13 | 46245 |
| C1BU59 | 72036 |
| O02215 | 6239  |
| O15564 | 5722  |
| O15565 | 5722  |

**5-  
methyltetrahydrofolate--  
homocysteine  
methyltransferase**

| UniProt | TXID   |
|---------|--------|
| Q99707  | 9606   |
| Q4JIJ3  | 9913   |
| Q9Z2Q4  | 10116  |
| A6H5Y3  | 10090  |
| Q5ZIC7  | 9031   |
| Q8JIY6  | 7955   |
| C3YH00  | 7739   |
| A7SKT1  | 45351  |
| Q09582  | 6239   |
| A8XY95  | 6238   |
| A9V1Z5  | 81824  |
| D3BM55  | 670386 |
| Q54P92  | 44689  |
| D2UYB1  | 5762   |
| C1EAX2  | 296587 |
| A4HT60  | 5671   |
| A8HYR2  | 3055   |
| C1MHB3  | 564608 |
| Q4QIT5  | 5664   |
| A4H4V2  | 5660   |
| A4RUZ2  | 436017 |
| C5K5V1  | 423536 |
| C5KDF9  | 423536 |
| B7GBG7  | 556484 |
| D7FUT0  | 2880   |
| B8C9X1  | 35128  |
| B7ZLW8  | 9606   |
| B9TKY6  | 3988   |
| Q5R872  | 9601   |

**serine O-  
acetyltransferase**

| UniProt | TXID   |
|---------|--------|
| A2WUJ7  | 39946  |
| A2X259  | 39946  |
| A2XC56  | 39946  |
| A2XDJ1  | 39946  |
| A2Y6U9  | 39946  |
| A4IA64  | 5671   |
| A4S0T9  | 436017 |
| A5AZH7  | 29760  |
| A5C9C1  | 29760  |
| A8JDD3  | 3055   |
| A9NXF4  | 3332   |
| A9PJW7  | 3695   |
| A9TE87  | 145481 |
| A9TFY0  | 145481 |
| A9U0K5  | 145481 |
| B0E8A7  | 370354 |
| B0EDF4  | 370354 |
| B0EMQ1  | 370354 |
| B0EPH7  | 370354 |
| B0ETS9  | 370354 |
| B4FLW0  | 4577   |
| B4FRV1  | 4577   |
| B4FU68  | 4577   |
| B6TDM6  | 4577   |
| B6TFX8  | 4577   |
| B7FKI8  | 3880   |
| B8LM71  | 3332   |
| B8LMI3  | 3332   |
| B9F3W8  | 39947  |
| B9FHA5  | 39947  |

**cysteine synthase A**

| UniProt | TXID   |
|---------|--------|
| A0E1N6  | 5888   |
| A1C462  | 5057   |
| A1C4R2  | 5057   |
| A1C5C7  | 5057   |
| A1CZP1  | 331117 |
| A1D097  | 331117 |
| A1D9N4  | 331117 |
| A1DBC7  | 331117 |
| A2DFV0  | 5722   |
| A2E119  | 5722   |
| A2EI82  | 5722   |
| A2EQY3  | 5722   |
| A2EUZ5  | 5722   |
| A2GMG5  | 5722   |
| A2QUT4  | 425011 |
| A2R8L0  | 425011 |
| A2Y9E5  | 39946  |
| A2ZMY2  | 39946  |
| A3AQX8  | 39947  |
| A3BCT7  | 39947  |
| A3CJM0  | 39947  |
| A3LRL7  | 4924   |
| A3LST3  | 4924   |
| A3LWK4  | 4924   |
| A3RM03  | 3847   |
| A3RM04  | 3847   |
| A3RM05  | 3847   |
| A3RM06  | 3847   |
| A4HPM6  | 5660   |
| A4ID39  | 5671   |

|        |        |         |        |
|--------|--------|---------|--------|
| B9G4N2 | 39947  | A4QRE5  | 148305 |
| B9GFK2 | 3694   | A4R8I4  | 148305 |
| B9H655 | 3694   | A4RHY9  | 148305 |
| B9IIJ9 | 3694   | A4R XR0 | 436017 |
| B9IDB2 | 3694   | A4RZI1  | 436017 |
| B9MWB2 | 3694   | A4S621  | 436017 |
| B9P7Y5 | 3694   | A4S765  | 436017 |
| B9RKA6 | 3988   | A5AAI2  | 425011 |
| B9S6T2 | 3988   | A5AEP0  | 29760  |
| C1EAI1 | 296587 | A5AFH5  | 29760  |
| C1MHL4 | 564608 | A5AVW3  | 29760  |
| C5WUP1 | 4558   | A5AXK6  | 29760  |
| C5WZ15 | 4558   | A5B2H2  | 29760  |
| C5XID2 | 4558   | A5BDL2  | 29760  |
| C5YUG1 | 4558   | A5C056  | 29760  |
| D7FYH8 | 2880   | A5C903  | 29760  |
| D7KN39 | 81972  | A5DDM8  | 4929   |
| D7L0N8 | 81972  | A5DIR7  | 4929   |
| D7L9G7 | 81972  | A5DLM4  | 4929   |
| D7MCE5 | 81972  | A5E3W7  | 36914  |
| D7MM67 | 81972  | A5E599  | 36914  |
| P93544 | 3562   | A5E7I6  | 36914  |
| Q014F1 | 70448  | A5HKN4  | 3848   |
| Q0DGG8 | 39947  | A5YT86  | 3847   |
| Q0DUI1 | 39947  | A5YT88  | 3847   |
| Q10QH1 | 39947  | A6N135  | 39946  |
| Q10S58 | 39947  | A6QSN0  | 339724 |
| Q1EP44 | 52838  | A6QZJ2  | 339724 |
| Q39218 | 3702   | A6R9L3  | 339724 |
| Q39533 | 3654   | A6RRM2  | 332648 |
| Q401L4 | 5759   | A6S2U3  | 332648 |
| Q401L5 | 5759   | A6SJC6  | 332648 |
| Q42538 | 3702   | A6ZV03  | 307796 |
| Q42588 | 3702   | A7A1I7  | 307796 |
| Q4D6P5 | 5693   | A7EEJ4  | 665079 |
| Q4Q2Q9 | 5664   | A7ELJ2  | 665079 |
| Q6IWF8 | 60913  | A7EQU1  | 665079 |
| Q6IWF9 | 60913  | A7MBF8  | 9913   |
| Q6IWG0 | 60913  | A7TKV2  | 436907 |
| Q6ZHU3 | 39947  | A7TLB1  | 436907 |
| Q84VU9 | 161934 | A7WQ39  | 2966   |
| Q8GZP7 | 4577   | A7YXT6  | 342587 |
| Q8GZP8 | 4577   | A8IEE5  | 3055   |
| Q8GZP9 | 4577   | A8ISA9  | 3055   |
| Q8LPN9 | 3055   | A8ISB0  | 3055   |
| Q8S895 | 3702   | A8J434  | 3055   |

|        |       |        |        |
|--------|-------|--------|--------|
| Q8W0E4 | 39947 | A8JFA4 | 3055   |
| Q8W199 | 3847  | A8N6U5 | 240176 |
| Q8W2B8 | 3702  | A8P274 | 240176 |
| Q9BKB1 | 5693  | A8PT64 | 425265 |
| Q9MAZ3 | 4683  | A8PY60 | 425265 |
| Q9SDP2 | 4679  | A8Q079 | 425265 |
| Q9SLZ8 | 45157 | A8WP61 | 6238   |
| Q9U8X1 | 46681 | A8XB74 | 6238   |
| Q9U8X2 | 5759  | A9JT04 | 7955   |
| Q9US33 | 4896  | A9JX40 | 13684  |
|        |       | A9NR69 | 3332   |
|        |       | A9NRJ4 | 3332   |
|        |       | A9NS10 | 3332   |
|        |       | A9PA30 | 3694   |
|        |       | A9PGL6 | 3694   |
|        |       | A9PJI4 | 3695   |
|        |       | A9RMD3 | 145481 |
|        |       | A9SEU2 | 145481 |
|        |       | A9SQU9 | 145481 |
|        |       | A9T924 | 145481 |
|        |       | A9TXJ4 | 145481 |
|        |       | A9V9E5 | 81824  |
|        |       | A9VB30 | 81824  |
|        |       | A9VDJ3 | 81824  |
|        |       | A9Y098 | 4182   |
|        |       | B0D0C2 | 486041 |
|        |       | B0D119 | 486041 |
|        |       | B0DT91 | 486041 |
|        |       | B0E5R8 | 370354 |
|        |       | B0E6A6 | 370354 |
|        |       | B0E9N8 | 370354 |
|        |       | B0FTX3 | 3983   |
|        |       | B0Y229 | 451804 |
|        |       | B0Y332 | 451804 |
|        |       | B0Y9U7 | 451804 |
|        |       | B0YEG4 | 451804 |
|        |       | B2AXA0 | 5145   |
|        |       | B2AYH9 | 5145   |
|        |       | B2B0Q4 | 5145   |
|        |       | B2GVN3 | 3702   |
|        |       | B2W2J7 | 426418 |
|        |       | B2WDB4 | 426418 |
|        |       | B2WLZ1 | 426418 |
|        |       | B2Z452 | 328376 |
|        |       | B3LIK5 | 285006 |
|        |       | B3RHI1 | 285006 |



|        |        |
|--------|--------|
| B3RT96 | 10228  |
| B4FF56 | 4577   |
| B4FKU8 | 4577   |
| B4FR08 | 4577   |
| B5RT41 | 4959   |
| B5U9U9 | 3562   |
| B5U9V0 | 3562   |
| B5VIX1 | 545124 |
| B5VNK3 | 545124 |
| B6GZ70 | 500485 |
| B6H387 | 500485 |
| B6HEU9 | 500485 |
| B6HFY6 | 500485 |
| B6HJ05 | 500485 |
| B6HWB3 | 500485 |
| B6JW15 | 402676 |
| B6JZ56 | 402676 |
| B6K2Z3 | 402676 |
| B6KRX1 | 508771 |
| B6QF88 | 441960 |
| B6QHT5 | 441960 |
| B6QLW8 | 441960 |
| B6TBZ1 | 4577   |
| B6U9G4 | 4577   |
| B6V3I4 | 2788   |
| B7F3B0 | 39947  |
| B7FKU7 | 3880   |
| B7G7B7 | 556484 |
| B7S487 | 556484 |
| B7Z2D6 | 9606   |
| B7Z6W5 | 9606   |
| B7ZV69 | 7955   |
| B8A367 | 4577   |
| B8A377 | 4577   |
| B8AA84 | 39946  |
| B8ABA1 | 39946  |
| B8AEL2 | 39946  |
| B8AJV7 | 39946  |
| B8B2R6 | 39946  |
| B8BHC6 | 39946  |
| B8BQD5 | 296543 |
| B8BUL0 | 35128  |
| B8LQB8 | 3332   |
| B8MBE4 | 441959 |
| B8MF97 | 441959 |
| B8MIN1 | 441959 |

|        |        |
|--------|--------|
| B8MXT9 | 332952 |
| B8NCT4 | 332952 |
| B8NR08 | 332952 |
| B8NRD7 | 332952 |
| B8P1T0 | 561896 |
| B9DHF3 | 3702   |
| B9F4C4 | 39947  |
| B9F673 | 39947  |
| B9FBT5 | 39947  |
| B9GFL5 | 3694   |
| B9GQA5 | 3694   |
| B9GQA6 | 3694   |
| B9HJY5 | 3694   |
| B9I8A4 | 3694   |
| B9MZH9 | 3694   |
| B9MZI1 | 3694   |
| B9MZI2 | 3694   |
| B9MZI5 | 3694   |
| B9NJL3 | 3694   |
| B9P570 | 3694   |
| B9RDU1 | 3988   |
| B9RET4 | 3988   |
| B9RET5 | 3988   |
| B9RET6 | 3988   |
| B9RET7 | 3988   |
| B9RET8 | 3988   |
| B9RET9 | 3988   |
| B9RTR4 | 3988   |
| B9RZ17 | 3988   |
| B9S9T9 | 3988   |
| B9SFU8 | 3988   |
| B9SY80 | 3988   |
| B9WF95 | 573826 |
| B9WIY6 | 573826 |
| B9WJY1 | 573826 |
| C0NG61 | 447093 |
| C0NT80 | 447093 |
| C0P079 | 447093 |
| C0P823 | 4577   |
| C0PCX2 | 4577   |
| C0RXJ3 | 482561 |
| C0RY11 | 482561 |
| C0SDA9 | 482561 |
| C0SI30 | 482561 |
| C0Z3K2 | 3702   |
| C1DZ19 | 296587 |

|        |        |
|--------|--------|
| C1DZY8 | 296587 |
| C1ED55 | 296587 |
| C1EFZ8 | 296587 |
| C1EIP1 | 296587 |
| C1G5U2 | 502780 |
| C1G6C1 | 502780 |
| C1GFF5 | 502780 |
| C1GM15 | 502780 |
| C1H1L8 | 502779 |
| C1H5G7 | 502779 |
| C1HA84 | 502779 |
| C1HBF9 | 502779 |
| C1MIX4 | 564608 |
| C1N079 | 564608 |
| C1N0F7 | 564608 |
| C1N5N0 | 564608 |
| C4JIL4 | 336963 |
| C4JMC2 | 336963 |
| C4JMM4 | 336963 |
| C4M0H9 | 5759   |
| C4MAH0 | 5759   |
| C4QVR5 | 644223 |
| C4R122 | 644223 |
| C4R7J7 | 644223 |
| C4XWE8 | 306902 |
| C4Y3V6 | 306902 |
| C4YBX3 | 306902 |
| C4YI55 | 5476   |
| C4YSM3 | 5476   |
| C5DGA4 | 559295 |
| C5DI11 | 559295 |
| C5E0A9 | 559307 |
| C5E1G7 | 559307 |
| C5E1M5 | 559307 |
| C5E370 | 559295 |
| C5FIF7 | 554155 |
| C5FXI1 | 554155 |
| C5FZ17 | 554155 |
| C5GIL6 | 559297 |
| C5GP88 | 559297 |
| C5GU14 | 559297 |
| C5JFV5 | 559298 |
| C5JP42 | 559298 |
| C5JTC9 | 559298 |
| C5JVI7 | 559298 |
| C5LC28 | 423536 |

|        |        |
|--------|--------|
| C5M1S7 | 294747 |
| C5M8Q0 | 294747 |
| C5MFY7 | 294747 |
| C5P096 | 222929 |
| C5P4F3 | 222929 |
| C5P7U2 | 222929 |
| C5WSS1 | 4558   |
| C5XFP1 | 4558   |
| C5XN68 | 4558   |
| C5YC80 | 4558   |
| C6HFC9 | 544712 |
| C6HLE4 | 544712 |
| C6T9Z8 | 3847   |
| C6TDJ4 | 3847   |
| C6TH76 | 3847   |
| C6TIP9 | 3847   |
| C6TJE5 | 3847   |
| C6TMX6 | 3847   |
| C7F7S7 | 42251  |
| C7GK81 | 574961 |
| C7GVT7 | 574961 |
| C7YI90 | 660122 |
| C7YR17 | 660122 |
| C7YWL1 | 660122 |
| C7Z8Q0 | 660122 |
| C7ZGA9 | 660122 |
| C7ZGU9 | 660122 |
| C7ZJ43 | 660122 |
| C8V3P9 | 227321 |
| C8V672 | 227321 |
| C8VMP5 | 227321 |
| C8Z8Q6 | 643680 |
| C8ZDR6 | 643680 |
| C9SCB2 | 526221 |
| C9SCV3 | 526221 |
| C9SGZ8 | 526221 |
| D0N3C1 | 403677 |
| D0N4G9 | 403677 |
| D0NL09 | 403677 |
| D0NL10 | 403677 |
| D0V0B2 | 93385  |
| D0V0B3 | 93385  |
| D1ZA82 | 5147   |
| D1ZN84 | 5147   |
| D2VTF3 | 5762   |
| D3BV85 | 670386 |

|        |        |
|--------|--------|
| D3DSK4 | 9606   |
| D4AQQ5 | 663331 |
| D4ARJ4 | 663331 |
| D4AX74 | 663331 |
| D4D0U1 | 663202 |
| D4DBB4 | 663202 |
| D4DLR3 | 663202 |
| D5G3W6 | 39416  |
| D5GJA2 | 39416  |
| D5GKD1 | 39416  |
| D6QX85 | 4565   |
| D6QX86 | 4513   |
| D6VUE8 | 559292 |
| D6VYU6 | 559292 |
| D7G6V6 | 2880   |
| D7KN34 | 81972  |
| D7L179 | 81972  |
| D7L1Q3 | 81972  |
| D7L305 | 81972  |
| D7L832 | 81972  |
| D7LKI2 | 81972  |
| D7LS98 | 81972  |
| D7LWG7 | 81972  |
| D7M6S7 | 81972  |
| D7M6S9 | 81972  |
| D7MBA7 | 81972  |
| D7MN67 | 81972  |
| O01592 | 6239   |
| O13326 | 4896   |
| O15570 | 5759   |
| O15635 | 5759   |
| O16282 | 6239   |
| O16284 | 6239   |
| O22682 | 3702   |
| O23733 | 3707   |
| O23735 | 3707   |
| O45679 | 6239   |
| O59701 | 4896   |
| O81154 | 4113   |
| O81155 | 4113   |
| O81523 | 3055   |
| P06106 | 4932   |
| P31300 | 4072   |
| P32232 | 10116  |
| P32260 | 3562   |
| P35520 | 9606   |

|        |        |
|--------|--------|
| P38076 | 4565   |
| P47998 | 3702   |
| P47999 | 3702   |
| P50125 | 162425 |
| P50867 | 162425 |
| P53206 | 4932   |
| P80608 | 4577   |
| P87131 | 4896   |
| Q00834 | 3562   |
| Q00VC8 | 70448  |
| Q00XK0 | 70448  |
| Q016B2 | 70448  |
| Q018U5 | 70448  |
| Q0CAW1 | 341663 |
| Q0CE96 | 341663 |
| Q0D1N1 | 341663 |
| Q0TYJ1 | 13684  |
| Q0UQZ1 | 13684  |
| Q0V2F1 | 13684  |
| Q0WLF5 | 3702   |
| Q0WW95 | 3702   |
| Q0WWQ5 | 3702   |
| Q10CX4 | 39947  |
| Q10CX6 | 39947  |
| Q10PZ5 | 39947  |
| Q1K4Z1 | 5141   |
| Q1KLZ1 | 3750   |
| Q1KLZ2 | 3750   |
| Q2GNW9 | 38033  |
| Q2H6K3 | 38033  |
| Q2HFV4 | 38033  |
| Q2I306 | 231512 |
| Q2QLX5 | 39947  |
| Q2U0R3 | 5062   |
| Q2U9X2 | 5062   |
| Q2UAR3 | 5062   |
| Q2URZ7 | 5062   |
| Q3E8Z3 | 3702   |
| Q3EAH2 | 3702   |
| Q3EAH3 | 3702   |
| Q3ECN8 | 3702   |
| Q3L195 | 4682   |
| Q3L196 | 4682   |
| Q3L197 | 4682   |
| Q3LAG5 | 4097   |
| Q401L7 | 5759   |

|        |        |
|--------|--------|
| Q43153 | 3562   |
| Q43317 | 3654   |
| Q43725 | 3702   |
| Q43726 | 3702   |
| Q4CS97 | 5693   |
| Q4CST7 | 5693   |
| Q4POL8 | 5270   |
| Q4P2T2 | 5270   |
| Q4PCE5 | 5270   |
| Q4Q159 | 5664   |
| Q4W9S1 | 5085   |
| Q4WC99 | 5085   |
| Q4WE91 | 5085   |
| Q4WEU7 | 5085   |
| Q54CN7 | 44689  |
| Q55IS7 | 5207   |
| Q570E6 | 3702   |
| Q58EC2 | 7955   |
| Q58H57 | 9541   |
| Q59US5 | 5476   |
| Q5A0E3 | 5476   |
| Q5ABX6 | 5476   |
| Q5AC97 | 5476   |
| Q5BD67 | 162425 |
| Q5EI65 | 7955   |
| Q5JNB0 | 39947  |
| Q5K8F5 | 5207   |
| Q5KCX2 | 5207   |
| Q5N761 | 39947  |
| Q5UJF9 | 39946  |
| Q5VLJ3 | 3981   |
| Q5VLJ4 | 3981   |
| Q5VND2 | 39947  |
| Q5VND3 | 39947  |
| Q640V0 | 8364   |
| Q6BL57 | 4959   |
| Q6BME7 | 4959   |
| Q6C1R7 | 4952   |
| Q6C6L3 | 4952   |
| Q6C7U9 | 4952   |
| Q6CLM7 | 28985  |
| Q6CST5 | 28985  |
| Q6DDN9 | 8355   |
| Q6FTU3 | 5478   |
| Q6FVR1 | 5478   |
| Q6NKY5 | 3702   |

|        |       |
|--------|-------|
| Q750D4 | 33169 |
| Q758B3 | 33169 |
| Q75AE8 | 33169 |
| Q767A2 | 3562  |
| Q76KF8 | 5076  |
| Q76MX2 | 4113  |
| Q7RYW6 | 5141  |
| Q7SHQ1 | 5141  |
| Q7XBB5 | 2787  |
| Q7XS58 | 39947 |
| Q7Y256 | 3505  |
| Q7ZXW6 | 8355  |
| Q86NC5 | 6239  |
| Q86NC6 | 6239  |
| Q8LAQ6 | 3702  |
| Q8LEC3 | 3702  |
| Q8W1A0 | 3847  |
| Q91WT9 | 10090 |
| Q92441 | 28985 |
| Q93244 | 6239  |
| Q9C123 | 4922  |
| Q9C262 | 5141  |
| Q9CAV8 | 3702  |
| Q9FS25 | 4113  |
| Q9FS26 | 4113  |
| Q9FS27 | 4113  |
| Q9FS29 | 4113  |
| Q9FSF5 | 4097  |
| Q9LG24 | 3702  |
| Q9LJA0 | 3702  |
| Q9MAZ2 | 4683  |
| Q9N0V7 | 9986  |
| Q9P3D4 | 5141  |
| Q9S6Z7 | 3702  |
| Q9S757 | 3702  |
| Q9SSV8 | 45157 |
| Q9SSV9 | 45157 |
| Q9SXS7 | 3702  |
| Q9U5E4 | 46681 |
| Q9U5E5 | 46681 |
| Q9UR58 | 5476  |
| Q9UVM2 | 5476  |
| Q9XEA6 | 39947 |
| Q9XEA8 | 39947 |
| Q9XEA9 | 4530  |



**cystathionine beta-synthase**

| <b>UniProt</b> | <b>TXID</b> |
|----------------|-------------|
| P32582         | 4932        |
| D6VUT5         | 559292      |
| C8Z949         | 643680      |
| C7GQ63         | 574961      |
| B5VJ98         | 545124      |
| B3LI75         | 285006      |
| A6ZUG6         | 307796      |
| Q6FVB8         | 5478        |
| A7TNI3         | 436907      |
| C5DGC1         | 559295      |
| Q6CKN5         | 28985       |
| Q750E3         | 33169       |
| C5DZT7         | 559307      |
| C4XVN8         | 306902      |
| A5DW54         | 36914       |
| A5DCN0         | 4929        |
| B2AVE1         | 5145        |
| C4R2R4         | 644223      |
| Q96V35         | 4922        |
| Q59T95         | 5476        |
| C4YF81         | 5476        |
| Q2H8M0         | 38033       |
| C5MEV0         | 294747      |
| A3LRC4         | 4924        |
| B9W6X5         | 573826      |
| Q6BU02         | 4959        |
| Q6C6J2         | 4952        |
| D5GFI0         | 39416       |
| Q8NJZ9         | 148305      |
| A4R9L9         | 148305      |
| C0NMD6         | 447093      |
| C6HT32         | 544712      |
| C7Z7Y2         | 660122      |
| B2LXT5         | 162425      |
| Q5B0W0         | 162425      |
| A7EUA9         | 665079      |
| B6Q8U6         | 441960      |
| B2WMD2         | 426418      |
| C5PHL8         | 222929      |
| A1CSJ1         | 5057        |
| C8V083         | 227321      |
| D1ZVF0         | 5147        |
| B8NBZ9         | 332952      |
| B0XW58         | 451804      |

**chorismate mutase**

| <b>UniProt</b> | <b>TXID</b> |
|----------------|-------------|
| P32178         | 4932        |
| D6W465         | 559292      |
| C8ZJ85         | 643680      |
| C7GY46         | 574961      |
| B3LLB4         | 285006      |
| A6ZWU8         | 307796      |
| A7TRW1         | 436907      |
| C5DUE5         | 559307      |
| Q6CVY3         | 28985       |
| Q6FLZ7         | 5478        |
| C5DIU4         | 559295      |
| Q75BG5         | 33169       |
| A3LWZ3         | 4924        |
| B9W9F0         | 573826      |
| Q59TS4         | 5476        |
| C5MCK6         | 294747      |
| C4R6Q3         | 644223      |
| A5DU51         | 36914       |
| B5RUN3         | 4959        |
| C4Y2Y8         | 306902      |
| A5DB21         | 4929        |
| Q9P4D8         | 4905        |
| Q6C5J7         | 4952        |
| C7Z4Q5         | 660122      |
| Q6L8Q0         | 241238      |
| D5GKL1         | 39416       |
| D1ZMF9         | 5147        |
| A4RJV4         | 148305      |
| Q7S8R4         | 5141        |
| B6Q7S9         | 441960      |
| C9S7U9         | 526221      |
| B8MRH6         | 441959      |
| C5JG06         | 559298      |
| C5GIY2         | 559297      |
| B6HLL8         | 500485      |
| D4B2M3         | 663331      |
| A7ETB4         | 665079      |
| A1DDL7         | 331117      |
| D4D3S7         | 663202      |
| Q0CJD7         | 341663      |
| B0Y1U1         | 451804      |
| Q4WVS3         | 5085        |
| A1CBP7         | 5057        |
| C1H355         | 502779      |

**prephenate dehydratase**

| <b>UniProt</b> | <b>TXID</b> |
|----------------|-------------|
| P32452         | 4932        |
| D6W0M9         | 559292      |
| A6ZSG4         | 307796      |
| C8ZGK9         | 643680      |
| C7GWR3         | 574961      |
| B3LPF0         | 285006      |
| C5DSU3         | 559307      |
| A7THC9         | 436907      |
| Q6FJS1         | 5478        |
| Q6CP67         | 28985       |
| C5DJU5         | 559295      |
| Q75AV0         | 33169       |
| B9WDL3         | 573826      |
| C4R7W3         | 644223      |
| Q6BKZ2         | 4959        |
| B6QGT5         | 441960      |
| C4YQ16         | 5476        |
| Q5AEN4         | 5476        |
| A3LZW3         | 4924        |
| B8MBZ7         | 441959      |
| A2R9Q0         | 425011      |
| Q2UTK6         | 5062        |
| B8NSF5         | 332952      |
| C4JMH0         | 336963      |
| Q30KV5         | 162425      |
| C8V9C8         | 227321      |
| C5P7Z3         | 222929      |
| Q6CEA0         | 4952        |
| A1C9Q8         | 5057        |
| C1GF42         | 502780      |
| C0SD07         | 482561      |
| Q4WTQ1         | 5085        |
| B0Y378         | 451804      |
| B2VUD6         | 426418      |
| D4AXE7         | 663331      |
| D4DL43         | 663202      |
| A6S156         | 332648      |
| B6HG19         | 500485      |
| C4Y7N5         | 306902      |
| C7YYW1         | 660122      |
| C5FIF2         | 554155      |
| Q0CA21         | 341663      |
| C6HG79         | 544712      |
| C0NE70         | 447093      |

|        |        |        |        |        |        |
|--------|--------|--------|--------|--------|--------|
| Q7S3M7 | 5141   | C1GBQ7 | 502780 | C5JYQ4 | 559298 |
| Q4X256 | 5085   | C0SAC6 | 482561 | C5GLZ1 | 559297 |
| A1DG77 | 331117 | C6HF62 | 544712 | C1H9D9 | 502779 |
| B8M103 | 441959 | C0NT20 | 447093 | A6R093 | 339724 |
| C5FCC8 | 554155 | A6S4C4 | 332648 | D5G7A6 | 39416  |
| B6H2J3 | 500485 | A6QSD4 | 339724 | Q0UFM9 | 13684  |
| C4JF01 | 336963 | C5FK82 | 554155 | C9SPD4 | 526221 |
| Q0U679 | 13684  | A2R3Z4 | 425011 | A7E5N7 | 665079 |
| Q0CHH3 | 341663 | B2WGT6 | 426418 | B6K3E0 | 402676 |
| C1GDG5 | 502780 | Q2U5Z9 | 5062   | O14361 | 4896   |
| A2QKG7 | 425011 | B8NLW5 | 332952 | A1CZJ7 | 331117 |
| C5K3P5 | 559298 | C5P6C8 | 222929 | A5DXH5 | 36914  |
| A6RCS6 | 339724 | C4JQB9 | 336963 | A8PZM1 | 425265 |
| C1HDZ3 | 502779 | Q0U2T2 | 13684  | B0CQ85 | 486041 |
| C5G712 | 559297 | Q9Y7B2 | 162425 | C5MAB3 | 294747 |
| D4AU51 | 663331 | C8V2P3 | 227321 | Q55YQ5 | 5207   |
| D4D1T3 | 663202 | D0MV05 | 403677 | Q5KN26 | 5207   |
| D3BRT1 | 670386 | A4S1M4 | 436017 | Q7RYQ1 | 5141   |
| C3XZE8 | 7739   | A8J7L1 | 3055   | Q5AF21 | 5476   |
| Q8H710 | 4787   | C1FGP1 | 296587 | A4RQP2 | 436017 |
| D0NQV7 | 403677 | B9RNW0 | 3988   | Q10N17 | 39947  |
| D0NLJ6 | 403677 | B9RCY0 | 3988   | A2Q4I2 | 3880   |
| B3S7J1 | 10228  | B9T3T6 | 3988   | A2XT43 | 39946  |
| B3RP93 | 10228  | A9S498 | 145481 | A2YQ89 | 39946  |
| B3S262 | 10228  | O13739 | 4896   | A2Z452 | 39946  |
| P46794 | 44689  | C6THT1 | 3847   | A2Z456 | 39946  |
| Q91WT9 | 10090  | C6TEQ5 | 3847   | A3ATK7 | 39947  |
| D3ZPH9 | 10116  | C6TBF4 | 3847   | A3C1L2 | 39947  |
| P32232 | 10116  | B6JVV2 | 402676 | A5BWG3 | 29760  |
| D3ZSC5 | 10116  | Q5K7Y8 | 5207   | A8CF65 | 39947  |
| A7MBF8 | 9913   | Q96VZ8 | 5207   | A8HXC5 | 3055   |
| Q58H57 | 9541   | B5AAU1 | 112509 | A9NXE9 | 3332   |
| C0SAH1 | 482561 | B2B2X4 | 5145   | A9PHG2 | 3694   |
| P35520 | 9606   | Q4P6P3 | 5270   | A9RME6 | 145481 |
| D3DSK4 | 9606   | A5AJI5 | 29760  | A9RP56 | 145481 |
| B7Z2D6 | 9606   | B9VU83 | 29760  | B1X4W3 | 39717  |
| A9Z023 | 8022   | B9IK27 | 3694   | B4FGT4 | 4577   |
| Q9N0V7 | 9986   | B9IK28 | 3694   | B4FQG2 | 4577   |
| Q2TZA8 | 5062   | B9HXM7 | 3694   | B4FSJ7 | 4577   |
| Q16YQ8 | 7159   | B9IL55 | 3694   | B5LAT0 | 4072   |
| Q16YQ7 | 7159   | P42738 | 3702   | B6SYB7 | 4577   |
| B7ZV69 | 7955   | Q29Q24 | 3702   | B7X943 | 3981   |
| A9JT04 | 7955   | B5LAU1 | 4072   | B7X944 | 3981   |
| Q5EI65 | 7955   | B4FNK8 | 4577   | B8A9D0 | 39946  |
| Q58EC2 | 7955   | D7LNU9 | 81972  | B8ALJ8 | 39946  |
| D3TMI8 | 37546  | D7KX08 | 81972  | B8LLZ1 | 3332   |

|        |        |        |        |        |        |
|--------|--------|--------|--------|--------|--------|
| Q6DDN9 | 8355   | D7M3J4 | 81972  | B8LQ85 | 3332   |
| Q7ZXW6 | 8355   | D2CSU4 | 4102   | B9F7Q4 | 39947  |
| Q640V0 | 8364   | D2CSU5 | 4102   | B9FV22 | 39947  |
| B4M0J8 | 7244   | B7FR81 | 556484 | B9G110 | 39947  |
| A7RYI9 | 45351  | B7S3U0 | 556484 | B9G554 | 39947  |
| A7S1D2 | 45351  | Q2QN58 | 39947  | B9H107 | 3694   |
| D2VBK6 | 5762   | B9GDY1 | 39947  | B9HM73 | 3694   |
| B4PYL9 | 7245   | Q5JN19 | 39947  | B9HQT5 | 3694   |
| B0X072 | 7176   | C5XKW2 | 4558   | B9HZ50 | 3694   |
| B0X071 | 7176   | C5XWV4 | 4558   | B9RXK2 | 3988   |
| Q9VRD9 | 7227   | C5YLL7 | 4558   | B9SN95 | 3988   |
| B3NY62 | 7220   | D7FQ27 | 2880   | B9SUJ5 | 3988   |
| B4I6D4 | 7238   | A9V4X1 | 81824  | C0PQ13 | 3332   |
| B4R3C5 | 7240   | A2WVD6 | 39946  | C1FED1 | 296587 |
| Q29FV1 | 46245  | A2X1M3 | 39946  | C5WNL7 | 4558   |
| B7G0B1 | 556484 | A2YVM5 | 39946  | C5X5W2 | 4558   |
| B3N0J1 | 7217   | Q9STB2 | 4081   | C5YFR9 | 4558   |
| B4K570 | 7230   | A8NSD2 | 240176 | D3U715 | 4102   |
| B4JYX7 | 7222   | A8PTC4 | 425265 | D3U716 | 4102   |
| Q9YHU3 | 31033  | Q30CZ6 | 28930  | D3U717 | 4102   |
| Q2V0C9 | 7460   | C5LJG6 | 423536 | D7KI05 | 81972  |
| B4NCR6 | 7260   | C5L754 | 423536 | D7L6M9 | 81972  |
| B4GWP0 | 7234   | B0CVP9 | 486041 | D7LIZ1 | 81972  |
| B9QBC8 | 432359 | Q013A6 | 70448  | D7LML1 | 81972  |
| B6KBE8 | 508771 | Q15FD1 | 4170   | D7M1H4 | 81972  |
| B9PKX0 | 5811   | Q9C544 | 3702   | O22241 | 3702   |
| D6WU53 | 7070   | Q6H819 | 39947  | Q01L56 | 4530   |
| Q9N4K2 | 6239   | Q9S7H4 | 3702   | Q0IZJ9 | 39947  |
| Q23264 | 6239   | A3BTJ8 | 39947  | Q0JDF7 | 39947  |
| C5LTC2 | 423536 | B4G0R4 | 4577   | Q650V6 | 39947  |
| C5K8R7 | 423536 | B5VTL1 | 545124 | Q650W1 | 39947  |
| A0D2L1 | 5888   | B6TF54 | 4577   | Q6JJ29 | 35884  |
| A0D3Z0 | 5888   | B6TU00 | 4577   | Q6Z3Y3 | 39947  |
| A0DFI6 | 5888   | B8A1Z5 | 4577   | Q7XLY2 | 4530   |
| Q9BKB2 | 5693   | C0PPE1 | 4577   | Q9FNJ8 | 3702   |
| Q384R5 | 5691   | Q6Z9E6 | 39947  | Q9SGD6 | 3702   |
| D0A7T9 | 679716 | Q9XF60 | 3702   | Q9SSE7 | 3702   |
| A4HX92 | 5671   |        |        | Q9ZUY3 | 3702   |
| B6RB68 | 91233  |        |        |        |        |
| Q4QEG9 | 5664   |        |        |        |        |
| A8WRM3 | 6238   |        |        |        |        |
| A8PS25 | 6279   |        |        |        |        |
| C4PYD1 | 6183   |        |        |        |        |
| C4PYD2 | 6183   |        |        |        |        |
| Q5KNK5 | 5207   |        |        |        |        |
| A8N8W2 | 240176 |        |        |        |        |

|        |        |
|--------|--------|
| Q9NG81 | 5689   |
| B0CTT6 | 486041 |
| A6SDF3 | 332648 |
| B7QJ62 | 6945   |
| Q4CRW9 | 5693   |
| Q4CXR9 | 5693   |
| Q4CYV4 | 5693   |
| Q4DF37 | 5693   |
| Q4DF38 | 5693   |
| Q4E2W1 | 5693   |
| Q4PAS1 | 5270   |
| Q9BH24 | 5693   |
| A0CDH1 | 5888   |
| A7TZ44 | 72036  |
| A9TXJ4 | 145481 |
| B0D119 | 486041 |
| B7Z6W5 | 9606   |
| C5P7B8 | 222929 |
| C5PCI8 | 222929 |
| C7ZEF7 | 660122 |
| O59701 | 4896   |
| O94073 | 4932   |
| Q4DF36 | 5693   |
| Q55IS7 | 5207   |
| Q5KCX2 | 5207   |
| Q9SSV8 | 45157  |

**aspartate  
aminotransferase**

| UniProt | TXID   |
|---------|--------|
| A0C550  | 5888   |
| A0CRJ1  | 5888   |
| A0CXN8  | 5888   |
| A0CYK9  | 5888   |
| A0E429  | 5888   |
| A0E7H1  | 5888   |
| A1C625  | 5057   |
| A1CHY4  | 5057   |
| A1CMR9  | 5057   |
| A1CRM0  | 5057   |
| A1CWS6  | 331117 |
| A1D4K6  | 331117 |
| A1DGQ3  | 331117 |
| A1DL69  | 331117 |
| A1YQJ2  | 39947  |
| A1ZAA5  | 7227   |
| A2DLF1  | 5722   |

**histidinol-phosphate  
aminotransferase**

| UniProt | TXID   |
|---------|--------|
| A1CP53  | 5057   |
| A1D207  | 331117 |
| A2QAL3  | 425011 |
| A3LSV4  | 4924   |
| A4R5D4  | 148305 |
| A4RSZ6  | 436017 |
| A5DDL3  | 4929   |
| A5E3V6  | 36914  |
| A6R8T8  | 339724 |
| A6RQF2  | 332648 |
| A6ZVG1  | 307796 |
| A7E9J3  | 665079 |
| A7THE9  | 436907 |
| A8J3D3  | 3055   |
| A8MRI5  | 3702   |
| A8P5U9  | 240176 |
| A8PCL5  | 240176 |

**aromatic amino acid  
aminotransferase I**

| UniProt | TXID   |
|---------|--------|
| P53090  | 4932   |
| D6VTV2  | 559292 |
| C8Z853  | 643680 |
| C7GWZ3  | 574961 |
| B3LHQ0  | 285006 |
| A6ZTY7  | 307796 |
| A7TT91  | 436907 |
| Q6FTM8  | 5478   |
| C5DT73  | 559307 |
| C5DLN0  | 559295 |
| Q6CKK3  | 28985  |
| Q752M6  | 33169  |
| Q6BYU5  | 4959   |
| A3LMX7  | 4924   |
| C4XXW0  | 306902 |
| B9WA90  | 573826 |
| C4YJ02  | 5476   |

|        |        |        |        |        |        |
|--------|--------|--------|--------|--------|--------|
| A2F7X5 | 5722   | A8Q8A0 | 425265 | Q5ADA2 | 5476   |
| A2G7J5 | 5722   | A9NX10 | 3332   | Q5ACW9 | 5476   |
| A2QJA6 | 425011 | A9T6Y6 | 145481 | A5DV12 | 36914  |
| A2R099 | 425011 | A9VDN0 | 81824  | C5M5E9 | 294747 |
| A2R823 | 425011 | B0DTT8 | 486041 | A5DFM7 | 4929   |
| A2WVA6 | 39946  | B0XMN9 | 451804 | C4QYZ3 | 644223 |
| A3GGD7 | 4924   | B1X4B7 | 39717  | Q6C551 | 4952   |
| A3GGR0 | 4924   | B2AS75 | 5145   | Q5AZE2 | 162425 |
| A3LZ01 | 4924   | B2VYI8 | 426418 | Q5B339 | 162425 |
| A4HD93 | 5660   | B3LTW3 | 285006 | C8V102 | 227321 |
| A4HMB3 | 5660   | B4FAW7 | 4577   | C8V843 | 227321 |
| A4R592 | 148305 | B5VKJ3 | 545124 | Q2UFD9 | 5062   |
| A4R8A4 | 148305 | B6HAF7 | 500485 | Q2U485 | 5062   |
| A4RX79 | 436017 | B6K373 | 402676 | A2QD20 | 425011 |
| A5A6K8 | 9598   | B6QBB4 | 441960 | A2R526 | 425011 |
| A5AZ93 | 29760  | B6TRS1 | 4577   | B8NHI9 | 332952 |
| A5BPA3 | 29760  | B7G747 | 556484 | B8NTN9 | 332952 |
| A5DH26 | 4929   | B8AHA9 | 39946  | C1H4Q3 | 502779 |
| A5DJN4 | 4929   | B8BPZ8 | 296543 | C0SF57 | 482561 |
| A5DPU3 | 4929   | B8M3C4 | 441959 | C1GK60 | 502780 |
| A5DTD8 | 36914  | B8N6W4 | 332952 | A1C7J1 | 5057   |
| A5E0D3 | 36914  | B8P2C7 | 561896 | Q4X0F7 | 5085   |
| A5E3K7 | 36914  | B9DHD3 | 3702   | B0XTG0 | 451804 |
| A5KBJ3 | 5855   | B9SB59 | 3988   | A1DHS0 | 331117 |
| A6R293 | 339724 | B9WFD8 | 573826 | B2WC58 | 426418 |
| A6RAW4 | 339724 | C0NL35 | 447093 | B2WP52 | 426418 |
| A6RGB2 | 339724 | C0S401 | 482561 | C5JQK8 | 559298 |
| A6SNC6 | 332648 | C1FED0 | 296587 | C5GBH3 | 559297 |
| A6SR37 | 332648 | C1FYG5 | 502780 | B6Q744 | 441960 |
| A6ZZL1 | 307796 | C1GUI5 | 502779 | C0NBP4 | 447093 |
| A7A0T3 | 307796 | C1ML32 | 564608 | B6GY09 | 500485 |
| A7AQ14 | 5865   | C3SA65 | 15368  | Q0CY85 | 341663 |
| A7EET7 | 665079 | C4JYD9 | 336963 | A6R4Q9 | 339724 |
| A7F916 | 665079 | C4R1F7 | 644223 | A6S3P7 | 332648 |
| A7RMR5 | 45351  | C4XWD3 | 306902 | B8MRR4 | 441959 |
| A7SPW2 | 45351  | C4YI23 | 5476   | B8MRR5 | 441959 |
| A7TKU3 | 436907 | C5DMK2 | 559295 | B8MI34 | 441959 |
| A8B1V5 | 184922 | C5DPA3 | 559307 | A7EXH0 | 665079 |
| A8HXW8 | 3055   | C5FC63 | 554155 | C5P1D9 | 222929 |
| A8I263 | 3055   | C5G7N6 | 559297 | C7YK49 | 660122 |
| A8J129 | 3055   | C5JKH7 | 559298 | C7ZH25 | 660122 |
| A8K482 | 9606   | C5M214 | 294747 | C7ZNJ6 | 660122 |
| A8N1I2 | 240176 | C5PAB2 | 222929 | C7ZF95 | 660122 |
| A8NFP4 | 240176 | C5Y092 | 4558   | A4R0K4 | 148305 |
| A8PVH6 | 425265 | C6TN17 | 3847   | C9SIQ8 | 526221 |
| A8Q9P5 | 425265 | C7Z4V1 | 660122 | Q0UVF5 | 13684  |

|        |        |        |        |        |        |
|--------|--------|--------|--------|--------|--------|
| A8WYZ3 | 6238   | C8VRC2 | 227321 | B6K3W8 | 402676 |
| A8XNT6 | 6238   | C8ZAC8 | 643680 | D5GJ27 | 39416  |
| A9NUJ0 | 3332   | C9S832 | 526221 | C5FSY7 | 554155 |
| A9NVA2 | 3332   | D0MY30 | 403677 | D4CYX5 | 663202 |
| A9PHH1 | 3694   | D1ZCJ6 | 5147   | D4AYN7 | 663331 |
| A9SXD7 | 145481 | D4AV67 | 663331 | C4JL9  | 336963 |
| A9TG09 | 145481 | D4D1H8 | 663202 | Q7S0F9 | 5141   |
| A9U4V4 | 145481 | D5GI57 | 39416  | O14192 | 4896   |
| A9UVY5 | 81824  | D6VVH1 | 559292 | Q9Y7S6 | 4896   |
| B0CQ48 | 486041 | D7FPJ8 | 2880   | O94570 | 4896   |
| B0CS62 | 486041 | D7KZ00 | 81972  | C6H9Z4 | 544712 |
| B0WHA4 | 7176   | O82030 | 4097   | Q2HDU3 | 38033  |
| B0WKE5 | 7176   | P07172 | 4932   | Q5KEQ7 | 5207   |
| B0XND0 | 451804 | P36605 | 4896   | Q55XW3 | 5207   |
| B0XS08 | 451804 | P56099 | 5479   | Q5KM31 | 5207   |
| B0Y6M8 | 451804 | Q0D0C3 | 341663 | B2AY10 | 5145   |
| B0YDJ9 | 451804 | Q0DY86 | 39947  | D1ZQT4 | 5147   |
| B2ACQ8 | 5145   | Q0UQ19 | 13684  | Q5M8X7 | 8364   |
| B2ACV8 | 5145   | Q27GM5 | 3702   | Q28I58 | 8364   |
| B2W091 | 426418 | Q2H2S0 | 38033  | D3B4I4 | 670386 |
| B2W5S5 | 426418 | Q2UCT8 | 5062   | B0CY75 | 486041 |
| B3L0V6 | 5851   | Q4P634 | 5270   | Q6PB16 | 8355   |
| B3LQZ0 | 285006 | Q4WS41 | 5085   | Q6IR98 | 8355   |
| B3LT00 | 285006 | Q595W3 | 4922   | Q54K00 | 44689  |
| B3MGP3 | 7217   | Q59SJ5 | 5476   | Q86AG8 | 44689  |
| B3MJE1 | 7217   | Q5BFG3 | 162425 | Q5E9N4 | 9913   |
| B3N8Z8 | 7220   | Q5KM46 | 5207   | Q8N5Z0 | 9606   |
| B3NPW9 | 7220   | Q6BMG0 | 4959   | Q4W5N8 | 9606   |
| B3RIR4 | 10228  | Q6C7F4 | 4952   | Q9WVM8 | 10090  |
| B3SB31 | 10228  | Q6CLF0 | 28985  | Q3UNS8 | 10090  |
| B4DJA6 | 9606   | Q6FX16 | 5478   | B7STY2 | 80604  |
| B4DY39 | 9606   | Q6MY81 | 5085   | Q64602 | 10116  |
| B4F9G1 | 4577   | Q6YV10 | 39947  | A8NRI2 | 240176 |
| B4FUH2 | 4577   | Q75B26 | 33169  | D6RP20 | 240176 |
| B4G803 | 7234   | Q7S9U6 | 5141   | D6RPR8 | 240176 |
| B4H584 | 7234   | Q8S3S8 | 39947  | Q2KEC9 | 242507 |
| B4HSK3 | 7238   | Q949X3 | 3702   | Q4PDK9 | 5270   |
| B4J5U2 | 7222   | Q9FEW2 | 4092   | Q4P8M5 | 5270   |
| B4JZ99 | 7222   |        |        | D6WQD2 | 7070   |
| B4KKW3 | 7230   |        |        | C1BQK8 | 217165 |
| B4KMG1 | 7230   |        |        | B8P756 | 561896 |
| B4KZL9 | 7230   |        |        |        |        |
| B4LCJ4 | 7244   |        |        |        |        |
| B4LNV2 | 7244   |        |        |        |        |
| B4LVII | 7244   |        |        |        |        |
| B4MQX8 | 7260   |        |        |        |        |

|        |        |
|--------|--------|
| B4N192 | 7260   |
| B4NW28 | 7245   |
| B4P6Q8 | 7245   |
| B4Q7L0 | 7240   |
| B4QHF7 | 7240   |
| B5E189 | 46245  |
| B5VM51 | 545124 |
| B5X142 | 8030   |
| B5X205 | 8030   |
| B5X2F0 | 8030   |
| B5X3Z1 | 8030   |
| B5YN39 | 35128  |
| B6HSS5 | 500485 |
| B6HVF7 | 500485 |
| B6HW12 | 500485 |
| B6HW52 | 500485 |
| B6JWD9 | 402676 |
| B6K3W4 | 402676 |
| B6KH83 | 508771 |
| B6Q2G9 | 441960 |
| B6QDD0 | 441960 |
| B6QPX5 | 441960 |
| B6T9J4 | 4577   |
| B6VBA1 | 135651 |
| B7G9Y7 | 556484 |
| B7GDE4 | 556484 |
| B7Q1F6 | 6945   |
| B7XA48 | 89462  |
| B7Z1I2 | 9606   |
| B7Z7E9 | 9606   |
| B7ZXK1 | 4577   |
| B8A0T6 | 4577   |
| B8AEH4 | 39946  |
| B8AEL7 | 39946  |
| B8B3J3 | 39946  |
| B8BQR8 | 296543 |
| B8LKC5 | 3332   |
| B8LLB8 | 3332   |
| B8LWS2 | 441959 |
| B8M6F1 | 441959 |
| B8MC93 | 441959 |
| B8MC94 | 441959 |
| B8NOW2 | 332952 |
| B8NBC7 | 332952 |
| B8NKG3 | 332952 |
| B9DGA8 | 3702   |

|        |        |
|--------|--------|
| B9H919 | 3694   |
| B9H920 | 3694   |
| B9HAW0 | 3694   |
| B9IA57 | 3694   |
| B9IL28 | 3694   |
| B9PQT7 | 5811   |
| B9QD75 | 432359 |
| B9RKN9 | 3988   |
| B9RNY6 | 3988   |
| B9RS46 | 3988   |
| B9RS47 | 3988   |
| B9SW33 | 3988   |
| B9WBI3 | 573826 |
| B9WFI3 | 573826 |
| B9WMG0 | 573826 |
| C0NCV0 | 447093 |
| C0NMW6 | 447093 |
| C0PSQ5 | 3332   |
| C0PSV4 | 3332   |
| C0S2A4 | 482561 |
| C0S545 | 482561 |
| C0S650 | 482561 |
| C1BMI0 | 217165 |
| C1BNE7 | 217165 |
| C1BS16 | 72036  |
| C1C1U3 | 344056 |
| C1E2Z1 | 296587 |
| C1G388 | 502780 |
| C1G3V5 | 502780 |
| C1G8V0 | 502780 |
| C1GRJ9 | 502779 |
| C1GVQ8 | 502779 |
| C1H6W5 | 502779 |
| C1L3B5 | 5127   |
| C1N9D2 | 564608 |
| C3YIV5 | 7739   |
| C3ZZL9 | 7739   |
| C4J030 | 4577   |
| C4JEM6 | 336963 |
| C4JFL7 | 336963 |
| C4JRQ5 | 336963 |
| C4QAH1 | 6183   |
| C4QEQ2 | 6183   |
| C4QWE4 | 644223 |
| C4R862 | 644223 |
| C4XWU9 | 306902 |



|        |        |
|--------|--------|
| C4XZV4 | 306902 |
| C4Y805 | 306902 |
| C4YHW0 | 5476   |
| C4YIK0 | 5476   |
| C5DGC6 | 559295 |
| C5DGI0 | 559295 |
| C5DRL3 | 559307 |
| C5DZC7 | 559307 |
| C5FPT6 | 554155 |
| C5FQ07 | 554155 |
| C5FUQ2 | 554155 |
| C5GEK9 | 559297 |
| C5GFQ6 | 559297 |
| C5GS95 | 559297 |
| C5JII9 | 559298 |
| C5JS27 | 559298 |
| C5JWL7 | 559298 |
| C5KR26 | 423536 |
| C5KTB2 | 423536 |
| C5KTB3 | 423536 |
| C5LTG3 | 423536 |
| C5LX48 | 423536 |
| C5M0L9 | 423536 |
| C5M0M0 | 423536 |
| C5M290 | 294747 |
| C5M6K3 | 294747 |
| C5M8E6 | 294747 |
| C5PAS0 | 222929 |
| C5PGG6 | 222929 |
| C5PHA1 | 222929 |
| C6H2K1 | 544712 |
| C6HI41 | 544712 |
| C6HJN1 | 544712 |
| C6LVT5 | 598745 |
| C6THE3 | 3847   |
| C6TNL0 | 3847   |
| C7GVK5 | 574961 |
| C7GXH3 | 574961 |
| C7Z199 | 660122 |
| C7Z7G7 | 660122 |
| C8V2V4 | 227321 |
| C8VA37 | 227321 |
| C8VL70 | 227321 |
| C8ZC70 | 643680 |
| C8ZCZ9 | 643680 |
| C9SFD1 | 526221 |

|        |        |
|--------|--------|
| D0A277 | 679716 |
| D0A706 | 679716 |
| D0MVV7 | 403677 |
| D2UYK0 | 5762   |
| D2V5T4 | 5762   |
| D3TRZ7 | 37546  |
| D4AKW1 | 663331 |
| D4ALE1 | 663331 |
| D4B5K0 | 663331 |
| D4DD02 | 663202 |
| D4DGI1 | 663202 |
| D4DKV6 | 663202 |
| D5GE31 | 39416  |
| D6VXI2 | 559292 |
| D6VY29 | 559292 |
| D6WJR3 | 7070   |
| D6WLK0 | 7070   |
| D7KU69 | 81972  |
| D7LCW9 | 81972  |
| D7LZ93 | 81972  |
| D7M3R5 | 81972  |
| D7MAT0 | 81972  |
| O01804 | 6239   |
| O20099 | 28957  |
| O22618 | 47247  |
| O42652 | 4896   |
| O48548 | 3847   |
| O48599 | 39947  |
| O94320 | 4896   |
| O96142 | 36329  |
| P00503 | 9823   |
| P00504 | 9031   |
| P00505 | 9606   |
| P00506 | 9823   |
| P00507 | 10116  |
| P00508 | 9031   |
| P05201 | 10090  |
| P05202 | 10090  |
| P08906 | 9796   |
| P12344 | 9913   |
| P13221 | 10116  |
| P17174 | 9606   |
| P23542 | 4932   |
| P28011 | 3879   |
| P28734 | 4039   |
| P33097 | 9913   |

|        |        |
|--------|--------|
| P37833 | 39947  |
| P46248 | 3702   |
| P46643 | 3702   |
| P46644 | 3702   |
| P46645 | 3702   |
| P46646 | 3702   |
| P93763 | 28957  |
| Q01802 | 4932   |
| Q019P1 | 70448  |
| Q0CGI9 | 341663 |
| Q0CGM4 | 341663 |
| Q0CPI2 | 341663 |
| Q0CZI5 | 341663 |
| Q0DBN4 | 39947  |
| Q0GA62 | 5037   |
| Q0JJ47 | 39947  |
| Q0UL49 | 13684  |
| Q0WSV8 | 3702   |
| Q16LN3 | 7159   |
| Q17983 | 6239   |
| Q17994 | 6239   |
| Q18L70 | 40286  |
| Q18L71 | 40284  |
| Q18L72 | 5664   |
| Q1EBW2 | 3702   |
| Q1HQC7 | 7091   |
| Q22066 | 6239   |
| Q22067 | 6239   |
| Q23JV0 | 312017 |
| Q28F67 | 8364   |
| Q29LN4 | 46245  |
| Q2PD61 | 5667   |
| Q2PD62 | 5666   |
| Q2PD75 | 5661   |
| Q2PD87 | 5661   |
| Q2PD89 | 5661   |
| Q2PD92 | 5671   |
| Q2TU84 | 9606   |
| Q2TZX5 | 5062   |
| Q2U6Q7 | 5062   |
| Q2UJK8 | 5062   |
| Q2V3D0 | 3702   |
| Q2XTE6 | 4113   |
| Q385Q9 | 5691   |
| Q3ECJ9 | 3702   |
| Q3UJH8 | 10090  |

|        |        |
|--------|--------|
| Q40107 | 3871   |
| Q40108 | 3871   |
| Q40325 | 3879   |
| Q41199 | 3847   |
| Q42391 | 4540   |
| Q42425 | 4540   |
| Q42794 | 3847   |
| Q42803 | 3847   |
| Q43057 | 4540   |
| Q43305 | 4540   |
| Q43781 | 34305  |
| Q4CRK6 | 5693   |
| Q4D080 | 5693   |
| Q4D1Q4 | 5693   |
| Q4FX34 | 347515 |
| Q4JHH9 | 6282   |
| Q4KYM6 | 29159  |
| Q4N691 | 5875   |
| Q4P5Q1 | 5270   |
| Q4PH18 | 5270   |
| Q4QAU4 | 5664   |
| Q4R559 | 9541   |
| Q4R5L1 | 9541   |
| Q4SXT0 | 99883  |
| Q4UDB3 | 5874   |
| Q4WCU8 | 5085   |
| Q4WK05 | 5085   |
| Q4WPT7 | 5085   |
| Q4X1K5 | 5085   |
| Q4YZE6 | 5821   |
| Q54SF7 | 44689  |
| Q55F21 | 44689  |
| Q55II6 | 5207   |
| Q56YR4 | 3702   |
| Q59N40 | 5476   |
| Q59ZG5 | 5476   |
| Q59ZM9 | 5476   |
| Q5AMH7 | 5476   |
| Q5ASM1 | 162425 |
| Q5B082 | 162425 |
| Q5BBT7 | 162425 |
| Q5DBC8 | 6182   |
| Q5K6H3 | 7159   |
| Q5K6H4 | 7159   |
| Q5K7X5 | 5207   |
| Q5K826 | 5207   |

|        |       |
|--------|-------|
| Q5NVH2 | 9601  |
| Q5R691 | 9601  |
| Q5REB0 | 9601  |
| Q5Z7I8 | 39947 |
| Q6BQN8 | 4959  |
| Q6BV55 | 4959  |
| Q6BXH3 | 4959  |
| Q6BZZ9 | 4952  |
| Q6CFZ7 | 4952  |
| Q6CJL3 | 28985 |
| Q6CK45 | 28985 |
| Q6EUS6 | 39947 |
| Q6FMF0 | 5478  |
| Q6FPE0 | 5478  |
| Q6FW98 | 5478  |
| Q6KAJ2 | 39947 |
| Q6NX26 | 8364  |
| Q753W1 | 33169 |
| Q75DQ5 | 33169 |
| Q7G1G6 | 3847  |
| Q7K221 | 7227  |
| Q7PM06 | 7165  |
| Q7RR40 | 73239 |
| Q7S9X7 | 5141  |
| Q7SC43 | 5141  |
| Q7SYK7 | 7955  |
| Q7SZS3 | 8355  |
| Q7YWB4 | 7227  |
| Q7ZTK9 | 8355  |
| Q7ZUW8 | 7955  |
| Q7ZWF5 | 7955  |
| Q86E27 | 6182  |
| Q8HQQ0 | 3885  |
| Q8IPY3 | 7227  |
| Q8L7N7 | 3702  |
| Q8T0M9 | 7227  |
| Q95VP1 | 6279  |
| Q964E9 | 5741  |
| Q964F0 | 5691  |
| Q964F1 | 5691  |
| Q964F2 | 5656  |
| Q9VQ61 | 7227  |

**tyrosine  
aminotransferase**

| <b>UniProt</b> | <b>TXID</b> |
|----------------|-------------|
| Q9LVY1         | 3702        |

**D-3-phosphoglycerate  
dehydrogenase**

| <b>UniProt</b> | <b>TXID</b> |
|----------------|-------------|
| A0SXJ4         | 4932        |

**phosphoserine  
aminotransferase**

| <b>UniProt</b> | <b>TXID</b> |
|----------------|-------------|
| P33330         | 4932        |

|        |        |        |        |        |        |
|--------|--------|--------|--------|--------|--------|
| D7MI01 | 81972  | A1C9P2 | 5057   | D6W2P0 | 559292 |
| B9MYE9 | 3694   | A1CIB1 | 5057   | C7GLR0 | 574961 |
| B9MYF0 | 3694   | A1CP23 | 5057   | B5VS68 | 545124 |
| B9MYF1 | 3694   | A1CWE9 | 331117 | B3LJL4 | 285006 |
| B9HZQ9 | 3694   | A1CZL2 | 331117 | A6ZP29 | 307796 |
| A9PF65 | 3694   | A1D1X7 | 331117 | C8ZGU3 | 643680 |
| A5AY27 | 29760  | A1DFM4 | 331117 | C5DWG5 | 559307 |
| A5BQ34 | 29760  | A1L3N1 | 8355   | A7THM8 | 436907 |
| Q6K5U4 | 39947  | A2DLU8 | 5722   | Q6FSL3 | 5478   |
| B9F563 | 39947  | A2F266 | 5722   | C5DN86 | 559295 |
| Q5Z7R3 | 39947  | A2F8V0 | 5722   | Q6CUH4 | 28985  |
| Q6K4T7 | 39947  | A2Q988 | 425011 | Q74ZB1 | 33169  |
| B7FA99 | 39947  | A2QU03 | 425011 | B9WBR9 | 573826 |
| A2X3T3 | 39946  | A2R9R5 | 425011 | Q59P52 | 5476   |
| A2X3V3 | 39946  | A2XYC2 | 39946  | C4R4X8 | 644223 |
| B8B1P8 | 39946  | A2YFS1 | 39946  | A3LW21 | 4924   |
| A2ZFA2 | 39946  | A2YVQ8 | 39946  | Q6BMW0 | 4959   |
| C5YQ31 | 4558   | A3BE72 | 39947  | C4Y8M3 | 306902 |
| C5Y4D9 | 4558   | A3LPQ2 | 4924   | A5DWY8 | 36914  |
| C5XA85 | 4558   | A4H3H6 | 5660   | Q6C2N1 | 4952   |
| C5Y4D8 | 4558   | A4HZ28 | 5671   | A5DG71 | 4929   |
| C5XPF1 | 4558   | A4R1I1 | 148305 | C7YUS7 | 660122 |
| C6T727 | 3847   | A4RI06 | 148305 | A1CM37 | 5057   |
| Q6DID9 | 8364   | A4RX85 | 436017 | A1DLY7 | 331117 |
| A0JMN6 | 7955   | A4S901 | 436017 | Q2GU63 | 38033  |
| Q16X98 | 7159   | A5A6P1 | 9598   | Q4WDJ5 | 5085   |
| Q4SKB4 | 99883  | A5C3X6 | 29760  | B0YCV4 | 451804 |
| B3NVU4 | 7220   | A5DEL5 | 4929   | Q10349 | 4896   |
| Q01FZ1 | 70448  | A5DSV7 | 36914  | B2B5S0 | 5145   |
| B0W9G3 | 7176   | A5GFY8 | 9823   | Q7RWH9 | 5141   |
| D3B9D9 | 670386 | A6QVW0 | 339724 | Q871N3 | 5141   |
| B4MTG1 | 7260   | A6QY69 | 339724 | A4R4Y8 | 148305 |
| B4Q2S3 | 7245   | A6R0F4 | 339724 | D4D9Z2 | 663202 |
| Q7QF69 | 7165   | A6RHA3 | 339724 | A2QBQ7 | 425011 |
| Q9VY42 | 7227   | A6RR69 | 332648 | A7EUP1 | 665079 |
| B4IGC3 | 7238   | A6RX75 | 332648 | D4AIQ9 | 663331 |
| B4L2T7 | 7230   | A6RZS6 | 332648 | C5P2B0 | 222929 |
| B4M2W5 | 7244   | A6ZR37 | 307796 | B8N7T9 | 332952 |
| C1MLQ1 | 564608 | A6ZVJ9 | 307796 | C9S8M5 | 526221 |
| B4H054 | 7234   | A7E4H2 | 665079 | Q2UID4 | 5062   |
| Q29H80 | 46245  | A7EN32 | 665079 | A6R965 | 339724 |
| B3RJH2 | 10228  | A7EW07 | 665079 | B6K167 | 402676 |
| B3SCB8 | 10228  | A7TRN8 | 436907 | C1DZS4 | 296587 |
| B4JJ14 | 7222   | A7TRX8 | 436907 | B6QEJ9 | 441960 |
| Q4E4E4 | 5693   | A8DWN5 | 45351  | Q0CZ29 | 341663 |
| Q4E4E9 | 5693   | A8ITU2 | 3055   | C4JP59 | 336963 |

|        |        |        |        |        |        |
|--------|--------|--------|--------|--------|--------|
| Q9GUA4 | 5698   | A8ITU6 | 3055   | C5FRR6 | 554155 |
| Q23DS3 | 312017 | A8ITU7 | 3055   | B8MCI4 | 441959 |
| A0E687 | 5888   | A8N1B6 | 240176 | A9SH82 | 145481 |
| Q6BG48 | 5888   | A8PWQ2 | 425265 | B3S7Q4 | 10228  |
| A4HPA3 | 5660   | A8XYH5 | 6238   | D5GHM5 | 39416  |
| A4IDL0 | 5671   | A9NXI5 | 3332   | A2XCQ4 | 39946  |
| A7S6Z0 | 45351  | A9PEK1 | 3694   | Q8LMR0 | 39947  |
| A8PPR4 | 6279   | A9RC42 | 145481 | C3Z0U0 | 7739   |
| A8X4H6 | 6238   | A9RIS6 | 145481 | C5GXJ2 | 559297 |
| A9SUV2 | 145481 | A9RZW6 | 145481 | Q9SHP0 | 3702   |
| B3MVS7 | 7217   | A9SKA3 | 145481 | Q0WPU8 | 3702   |
| B4FEZ7 | 4577   | A9V4F4 | 81824  | D6W9Q3 | 7070   |
| B7QLV1 | 6945   | B0CPN5 | 486041 | C1GXN9 | 502779 |
| B7ZWW7 | 4577   | B0EH41 | 370354 | B4FRI1 | 4577   |
| B8C0X0 | 35128  | B0WPU3 | 7176   | B6TXR8 | 4577   |
| B9RVV0 | 3988   | B0XMR9 | 451804 | D7L9G6 | 81972  |
| B9SBC0 | 3988   | B0XV36 | 451804 | D7MCE6 | 81972  |
| C3ZBR3 | 7739   | B0Y361 | 451804 | C8VNW8 | 227321 |
| D2W1X5 | 5762   | B0Y712 | 451804 | B6RB66 | 91233  |
| D6WN14 | 7070   | B2ACR5 | 5145   | B9H657 | 3694   |
| P04694 | 10116  | B2AQW9 | 5145   | Q803I7 | 7955   |
| P17735 | 9606   | B2B5Q8 | 5145   | Q6P2U8 | 7955   |
| Q22UJ3 | 312017 | B2VUB9 | 426418 | A4RUK4 | 436017 |
| Q4CVI0 | 5693   | B2VUF1 | 426418 | B8LRT6 | 3332   |
| Q4CYW7 | 5693   | B2W9P7 | 426418 | A6QR28 | 9913   |
| Q4D3Y8 | 5693   | B3LRJ9 | 285006 | B2W2S6 | 426418 |
| Q4E4E7 | 5693   | B3LTS5 | 285006 | A8IH03 | 3055   |
| Q4Q1I5 | 5664   | B3MMW3 | 7217   | C1BJA5 | 8014   |
| Q54K95 | 44689  | B3N4K2 | 7220   | B9S6T4 | 3988   |
| Q58CZ9 | 9913   | B3RTC6 | 10228  | Q96255 | 3702   |
| Q8QZR1 | 10090  | B4FWI4 | 4577   | Q1EBU1 | 3702   |
| Q93703 | 6239   | B4G011 | 4577   | Q8L7P0 | 3702   |
| Q9FN30 | 3702   | B4G9U8 | 7234   | Q8LBA3 | 3702   |
| A1L4G7 | 9606   | B4HX27 | 7238   | Q640D3 | 8355   |
| A3CCA4 | 39947  | B4JPK0 | 7222   | Q28I26 | 8364   |
| A5BY00 | 29760  | B4KHA6 | 7230   | A0JPC0 | 8364   |
| A6H7B2 | 9913   | B4LQG8 | 7244   | B4K5X3 | 7230   |
| A7TAK3 | 45351  | B4MWE0 | 7260   | P52877 | 3562   |
| A9CM06 | 39947  | B4P181 | 7245   | A9UW97 | 81824  |
| A9X448 | 226208 | B4QAC2 | 7240   | A0BLK8 | 5888   |
| B0I503 | 4577   | B5VHK9 | 545124 | A2DW27 | 5722   |
| B4F891 | 4577   | B6H0R3 | 500485 | A2FXW5 | 5722   |
| B8A175 | 4577   | B6HAI9 | 500485 | A6SD91 | 332648 |
| B8AFY0 | 39946  | B6HFP1 | 500485 | A7S471 | 45351  |
| B8AFY1 | 39946  | B6HTX7 | 500485 | A8NH91 | 240176 |
| B8LLE0 | 3332   | B6JXX0 | 402676 | A8PRI6 | 425265 |

|        |        |        |        |        |        |
|--------|--------|--------|--------|--------|--------|
| B9F575 | 39947  | B6K248 | 402676 | A8Y1C7 | 6238   |
| B9HGQ0 | 3694   | B6QBG9 | 441960 | B0D3P8 | 486041 |
| B9NGM4 | 3694   | B6QGR6 | 441960 | B0EQ60 | 370354 |
| B9RVU9 | 3988   | B6QQP8 | 441960 | B0WL19 | 7176   |
| D3DWS2 | 9606   | B6SKK1 | 4577   | B3M1I2 | 7217   |
| D3K4J1 | 3469   | B6SL40 | 4577   | B3P5J6 | 7220   |
| D4NYR2 | 39984  | B6SYR1 | 4577   | B4GPH5 | 7234   |
| D7F4K3 | 3656   | B7FY72 | 556484 | B4HZ76 | 7238   |
| D7MTM9 | 81972  | B7FY73 | 556484 | B4JYI7 | 7222   |
| P33447 | 5693   | B8C3X1 | 35128  | B4MBU3 | 7244   |
| Q3UEH2 | 10090  | B8LCI4 | 296543 | B4NFM9 | 7260   |
| Q4JR87 | 3880   | B8LWC9 | 441959 | B4PQ55 | 7245   |
| Q4ZJF7 | 3847   | B8M1U8 | 441959 | B6GXM1 | 500485 |
| Q5Z7R2 | 39947  | B8MBX9 | 441959 | B6KS29 | 508771 |
| Q6K2Y8 | 39947  | B8N110 | 332952 | B7FRD6 | 556484 |
| Q8GUE9 | 4142   | B8NCW5 | 332952 | B7Q0D6 | 6945   |
| Q8H146 | 3702   | B8NSD9 | 332952 | B9TIH1 | 3988   |
| Q8W462 | 3702   | B9FCV6 | 39947  | C5M730 | 294747 |
| Q9QWS4 | 10116  | B9G167 | 39947  | C5M731 | 294747 |
| Q9SMG7 | 4513   | B9GNT1 | 3694   | P91856 | 6239   |
| Q9ST02 | 4513   | B9HK69 | 3694   | Q0V4D2 | 13684  |
| Q9ST03 | 4513   | B9HVD9 | 3694   | Q16LP7 | 7159   |
| Q9ST44 | 4513   | B9MVW0 | 3694   | Q22NW6 | 312017 |
| Q9XSW4 | 452646 | B9P8C8 | 3694   | Q29BY2 | 46245  |
|        |        | B9P8U3 | 3694   | Q4P2Y2 | 5270   |
|        |        | B9P9I0 | 3694   | Q55CQ6 | 44689  |
|        |        | B9P9W6 | 3694   | Q5BAM1 | 162425 |
|        |        | B9R765 | 3988   | Q5KCD9 | 5207   |
|        |        | B9RYA3 | 3988   | Q5TRW7 | 7165   |
|        |        | B9SG91 | 3988   | Q60I38 | 5759   |
|        |        | B9W9J7 | 573826 | Q68FU2 | 10116  |
|        |        | C0NE90 | 447093 | Q99K85 | 10090  |
|        |        | C0NIB7 | 447093 | Q9VAN0 | 7227   |
|        |        | C0NJP0 | 447093 | Q9Y617 | 9606   |
|        |        | C0PKN2 | 4577   | A2D968 | 5722   |
|        |        | C0PLN9 | 4577   | B0ETT3 | 370354 |
|        |        | C0S590 | 482561 | B0ETT4 | 370354 |
|        |        | C0SD24 | 482561 | B1N376 | 5759   |
|        |        | C0SE91 | 482561 | B4DHX7 | 9606   |
|        |        | C1E6U3 | 296587 | B9PQI1 | 5811   |
|        |        | C1G4B3 | 502780 | B9QLX4 | 432359 |
|        |        | C1GF60 | 502780 | C4WYG7 | 7029   |
|        |        | C1GHI9 | 502780 | C5L0M1 | 423536 |
|        |        | C1GN15 | 502780 | C5LFP4 | 423536 |
|        |        | C1GW57 | 502779 | C6T8T9 | 3847   |
|        |        | C1HD60 | 502779 | D0MSZ0 | 403677 |



|        |        |        |       |
|--------|--------|--------|-------|
| C1HDR7 | 502779 | D2I860 | 9646  |
| C1ML13 | 564608 | D3TLH6 | 37546 |
| C3YSM4 | 7739   | P10658 | 9986  |
| C4J316 | 4577   | Q01CH3 | 70448 |
| C4JGI0 | 336963 | Q1HRL1 | 7159  |
| C4JMI7 | 336963 | Q2F5M8 | 7091  |
| C4JS89 | 336963 | Q3U6K9 | 10090 |
| C4R1C8 | 644223 | Q3ULZ3 | 10090 |
| C4WRS4 | 7029   | Q543K5 | 10090 |
| C4Y6R5 | 306902 | Q80YG1 | 10116 |
| C5DBS7 | 559295 | Q8BTJ1 | 10090 |
| C5DTI9 | 559307 | Q99JU9 | 10090 |
| C5FID3 | 554155 |        |       |
| C5FUA8 | 554155 |        |       |
| C5FV36 | 554155 |        |       |
| C5G128 | 554155 |        |       |
| C5GK58 | 559297 |        |       |
| C5GM12 | 559297 |        |       |
| C5GTT1 | 559297 |        |       |
| C5GWS0 | 559297 |        |       |
| C5JNH3 | 559298 |        |       |
| C5JTY2 | 559298 |        |       |
| C5JXG8 | 559298 |        |       |
| C5JYN3 | 559298 |        |       |
| C5MBK5 | 294747 |        |       |
| C5P7X8 | 222929 |        |       |
| C5PAN5 | 222929 |        |       |
| C5PG42 | 222929 |        |       |
| C5PGY2 | 222929 |        |       |
| C5Y9E6 | 4558   |        |       |
| C5YLQ3 | 4558   |        |       |
| C5Z776 | 4558   |        |       |
| C6HCU8 | 544712 |        |       |
| C6HG97 | 544712 |        |       |
| C6HJ26 | 544712 |        |       |
| C6HNQ7 | 544712 |        |       |
| C7GKK5 | 574961 |        |       |
| C7GRR4 | 574961 |        |       |
| C7YSG8 | 660122 |        |       |
| C7YTE6 | 660122 |        |       |
| C7YYH4 | 660122 |        |       |
| C7Z561 | 660122 |        |       |
| C8VG78 | 227321 |        |       |
| C8VQV6 | 227321 |        |       |
| C8Z793 | 643680 |        |       |
| C8ZAH1 | 643680 |        |       |

|        |        |
|--------|--------|
| C9S872 | 526221 |
| C9S898 | 526221 |
| C9ST75 | 526221 |
| D1ZVD8 | 5147   |
| D2D316 | 3635   |
| D2VJX3 | 5762   |
| D3DLY8 | 559292 |
| D3TPA7 | 37546  |
| D3TRK9 | 37546  |
| D4AUH4 | 663331 |
| D4AW29 | 663331 |
| D4AXG5 | 663331 |
| D4CZF5 | 663202 |
| D4D1K2 | 663202 |
| D4DBZ4 | 663202 |
| D4DGY5 | 663202 |
| D5G7B2 | 39416  |
| D5GIQ2 | 39416  |
| D6VVL0 | 559292 |
| D6WJ70 | 7070   |
| D7KF19 | 81972  |
| D7L3K7 | 81972  |
| D7L9Z5 | 81972  |
| D7MF42 | 81972  |
| O04130 | 3702   |
| O08651 | 10116  |
| O17626 | 6239   |
| O43175 | 9606   |
| O49485 | 3702   |
| P40054 | 4932   |
| P40510 | 4932   |
| P87228 | 4896   |
| Q00TL2 | 70448  |
| Q019N3 | 70448  |
| Q019N5 | 70448  |
| Q0CA06 | 341663 |
| Q0CR03 | 341663 |
| Q0D094 | 341663 |
| Q0DAG1 | 39947  |
| Q0QJL3 | 49495  |
| Q0U504 | 13684  |
| Q0UFP9 | 13684  |
| Q0VFN3 | 8364   |
| Q17AF8 | 7159   |
| Q1HR10 | 7159   |
| Q25AL6 | 4530   |

|        |        |
|--------|--------|
| Q28CH6 | 8364   |
| Q29M32 | 46245  |
| Q2GSY9 | 38033  |
| Q2GW64 | 38033  |
| Q2GZK2 | 38033  |
| Q2U0N3 | 5062   |
| Q2UJX7 | 5062   |
| Q2UTJ2 | 5062   |
| Q4PF80 | 5270   |
| Q4WHR3 | 5085   |
| Q4WQ76 | 5085   |
| Q4WTN4 | 5085   |
| Q54UH8 | 44689  |
| Q55YV2 | 5207   |
| Q56WY7 | 3702   |
| Q5A3K7 | 5476   |
| Q5AS64 | 162425 |
| Q5B1P6 | 162425 |
| Q5BFA5 | 162425 |
| Q5EAD2 | 9913   |
| Q5K657 | 121759 |
| Q5KN70 | 5207   |
| Q5R7M2 | 9601   |
| Q5RF12 | 9601   |
| Q60HD7 | 9541   |
| Q61753 | 10090  |
| Q67W99 | 39947  |
| Q6BWI7 | 4959   |
| Q6C284 | 4952   |
| Q6CTX5 | 28985  |
| Q6FIP3 | 5478   |
| Q6MY49 | 5085   |
| Q6PHU9 | 7955   |
| Q6ZAA5 | 39947  |
| Q75CF2 | 33169  |
| Q76KF5 | 5759   |
| Q7PWU4 | 7165   |
| Q7RWH3 | 5141   |
| Q7XMP6 | 39947  |
| Q871M4 | 5141   |
| Q8C5X4 | 10090  |
| Q8LGJ6 | 3702   |
| Q9LT69 | 3702   |
| Q9TXJ5 | 5664   |
| Q9VKI8 | 7227   |

**phosphoserine  
phosphatase**

**L-serine dehydratase**

**homoserine kinase**

| UniProt | TXID   | UniProt | TXID   | UniProt | TXID   |
|---------|--------|---------|--------|---------|--------|
| A0JCK1  | 51655  | P25379  | 4932   | A1C9S0  | 5057   |
| A1CJC3  | 5057   | D6VQV4  | 559292 | A1CZI7  | 331117 |
| A1D856  | 331117 | C8Z427  | 643680 | A2R9N8  | 425011 |
| A3CD22  | 39947  | B3LU22  | 285006 | A2XBC6  | 39946  |
| A3LND7  | 4924   | C7GT17  | 574961 | A3AD11  | 39947  |
| A4QR74  | 148305 | A6ZTD3  | 307796 | A3LZ82  | 4924   |
| A4S0L9  | 436017 | B5VEP8  | 545124 | A4HIP2  | 5660   |
| A5ABM6  | 425011 | A7TFC2  | 436907 | A4I5Y9  | 5671   |
| A5DIA2  | 4929   | Q6FX72  | 5478   | A4QUJ7  | 148305 |
| A5DUQ3  | 36914  | C5DYU2  | 559307 | A5B5G1  | 29760  |
| A6QXL5  | 339724 | B2G4A8  | 4956   | A5DJG5  | 4929   |
| A6SIF0  | 332648 | Q751S7  | 33169  | A5E2A2  | 36914  |
| A6ZUL9  | 307796 | Q6CV26  | 28985  | A6RK72  | 332648 |
| A7EG80  | 665079 | C5DJY9  | 559295 | A6ZST1  | 307796 |
| A7SA51  | 45351  | C4R1X7  | 644223 | A7E4T3  | 665079 |
| A7TEU0  | 436907 | A3LQ20  | 4924   | A7TH47  | 436907 |
| A8JEM3  | 3055   | A3LN10  | 4924   | A8I826  | 3055   |
| A8QCA2  | 6279   | Q6BZE0  | 4959   | A8N251  | 240176 |
| A8WQV3  | 6238   | Q6BTC6  | 4959   | A8Q9N6  | 425265 |
| A9PCH8  | 3694   | Q5A307  | 5476   | A9T5Q1  | 145481 |
| A9SSV1  | 145481 | A4QUX7  | 148305 | B0CQV8  | 486041 |
| A9UX52  | 81824  | A4R1F1  | 148305 | B0Y391  | 451804 |
| B0WEJ6  | 7176   | Q55SE3  | 5207   | B1X5R3  | 39717  |
| B0XY3   | 451804 | Q5KGT7  | 5207   | B2B725  | 5145   |
| B2AUN4  | 5145   | Q5K9Z3  | 5207   | B2WL10  | 426418 |
| B2LU26  | 9940   | Q55JK8  | 5207   | B3LSE6  | 285006 |
| B2VRC7  | 426418 | B9WAH5  | 573826 | B4FKF4  | 4577   |
| B3LI28  | 285006 | B9WEK5  | 573826 | B5VJV5  | 545124 |
| B3M6G1  | 7217   | B8M831  | 441959 | B6HGD7  | 500485 |
| B3NCF9  | 7220   | B8MK73  | 441959 | B6K3F7  | 402676 |
| B3RK08  | 10228  | C4XZ64  | 306902 | B6KT41  | 508771 |
| B4H1L4  | 7234   | C4Y2U5  | 306902 | B6QCY9  | 441960 |
| B4HKQ3  | 7238   | A6RLV9  | 332648 | B6UB59  | 4577   |
| B4IYA6  | 7222   | A5DUW2  | 36914  | B7G1B0  | 556484 |
| B4KVV4  | 7230   | A5DZC0  | 36914  | B8C5L6  | 35128  |
| B4LHQ1  | 7244   | A7EL82  | 665079 | B8LR75  | 3332   |
| B4MKL7  | 7260   | C7YLG5  | 660122 | B8MC15  | 441959 |
| B4NV80  | 7240   | C7YTU4  | 660122 | B8NSG6  | 332952 |
| B4PEX1  | 7245   | A1KYC1  | 6500   | B9MZ08  | 3694   |
| B4QN61  | 7240   | B2WFR0  | 426418 | B9Q0E9  | 5811   |
| B5X9K1  | 8030   | Q0CTG7  | 341663 | B9QNJ0  | 432359 |
| B6HFQ2  | 500485 | Q0CLL4  | 341663 | B9RVC5  | 3988   |
| B6K6U9  | 402676 | Q86B06  | 44689  | B9RVC9  | 3988   |
| B6QSZ5  | 441960 | B2B5V5  | 5145   | B9WH06  | 573826 |
| B6SU38  | 4577   | A1L2T1  | 8355   | C0NIL8  | 447093 |

|        |        |        |        |        |        |
|--------|--------|--------|--------|--------|--------|
| B7FV03 | 556484 | A1L2R8 | 8355   | C0S9H3 | 482561 |
| B7PHY5 | 6945   | Q6PAE9 | 8355   | C1GC00 | 502780 |
| B8BLF8 | 39946  | Q5M8H3 | 8364   | C1H0Q4 | 502779 |
| B8BPT0 | 39946  | C9SDW2 | 526221 | C4R5X1 | 644223 |
| B8BTL3 | 35128  | D1Z612 | 5147   | C4Y9P3 | 306902 |
| B8MLU6 | 441959 | Q8R238 | 10090  | C4YQW2 | 5476   |
| B8NUL7 | 332952 | Q3UEN6 | 10090  | C5DM98 | 559295 |
| B9ELP5 | 8030   | Q8VBT2 | 10090  | C5E0V8 | 559307 |
| B9NH06 | 3694   | A2QI44 | 425011 | C5FF32 | 554155 |
| B9RLN8 | 3988   | B3S1X5 | 10228  | C5G891 | 559297 |
| B9WAX5 | 573826 | Q9C2I1 | 5141   | C5JPN9 | 559298 |
| C0NEA3 | 447093 | D3B7Q8 | 670386 | C5MGS8 | 294747 |
| C0SDH0 | 482561 | A7RWI2 | 45351  | C5P8T2 | 222929 |
| C1BLX3 | 8014   | P09367 | 10116  | C5XWS4 | 4558   |
| C1GFM4 | 502780 | D3ZHV7 | 10116  | C6H7Y8 | 544712 |
| C1H593 | 502779 | C5PE25 | 222929 | C7GTV5 | 574961 |
| C1MZD9 | 564608 | A5PKH5 | 9913   | C7YS28 | 660122 |
| C3KJZ8 | 229290 | Q0VCW4 | 9913   | C8V9I7 | 227321 |
| C3YY11 | 7739   | P20132 | 9606   | C8ZA93 | 643680 |
| C4JE76 | 336963 | Q8WW81 | 9606   | C9SB40 | 526221 |
| C4QEG1 | 6183   | Q96GA7 | 9606   | D0MVQ7 | 403677 |
| C4R7E7 | 644223 | Q2GXT3 | 38033  | D1ZMW5 | 5147   |
| C4WU94 | 7029   | B7PN84 | 6945   | D2DKF1 | 3847   |
| C4WU95 | 7029   | A8NGQ4 | 240176 | D3BU36 | 670386 |
| C4Y8K3 | 306902 | Q5B5G3 | 162425 | D3DKX2 | 559292 |
| C4YJL9 | 5476   | A1CR51 | 5057   | D4AZS6 | 663331 |
| C5DC98 | 559295 | B0XPH8 | 451804 | D4DJ16 | 663202 |
| C5DX25 | 559307 | B6H8Y6 | 500485 | D5GIV1 | 39416  |
| C5FZJ1 | 554155 | B8NST7 | 332952 | D7L8T5 | 81972  |
| C5GPL3 | 559297 | Q2UUE9 | 5062   | O43056 | 4896   |
| C5JVC0 | 559298 | Q4WJF6 | 5085   | P17423 | 4932   |
| C5KQK8 | 423536 | Q6CPW0 | 28985  | Q0CA33 | 341663 |
| C5M656 | 294747 | A0BE77 | 5888   | Q0UEC5 | 13684  |
| C5PIN9 | 222929 | A0CM66 | 5888   | Q2GY67 | 38033  |
| C5Y6W1 | 4558   | A0DHM0 | 5888   | Q2UTL6 | 5062   |
| C6HN58 | 544712 | A1CHC6 | 5057   | Q4CME2 | 5693   |
| C6K7H8 | 51655  | A1CLE7 | 5057   | Q4DQQ2 | 5693   |
| C6TJ83 | 3847   | A1CXG1 | 331117 | Q4P5L6 | 5270   |
| C7GRP1 | 574961 | A1D5X3 | 331117 | Q4Q6Y2 | 5664   |
| C7YML7 | 660122 | A2FA06 | 5722   | Q4WTR4 | 5085   |
| C8Z9A1 | 643680 | A2FRC0 | 5722   | Q587A9 | 5691   |
| C9JBI3 | 9606   | A2QI80 | 425011 | Q5AS87 | 162425 |
| C9SNI7 | 526221 | A3LW23 | 4924   | Q5KBD4 | 5207   |
| D0MT22 | 403677 | A4H4N7 | 5660   | Q6BNS6 | 4959   |
| D1ZKP4 | 5147   | A4HSW5 | 5671   | Q6C1T8 | 4952   |
| D2A0T2 | 7070   | A4RI26 | 148305 | Q6CNL8 | 28985  |

|        |        |        |        |        |       |
|--------|--------|--------|--------|--------|-------|
| D3NQB6 | 6239   | A4S5M8 | 436017 | Q6FPV4 | 5478  |
| D3TSE0 | 37546  | A5DG69 | 4929   | Q6K969 | 39947 |
| D4ASR0 | 663331 | A5DWY6 | 36914  | Q75C47 | 33169 |
| D4D4I9 | 663202 | A6RUK3 | 332648 | Q7FLV1 | 3702  |
| D5AB90 | 3332   | A6SSX5 | 332648 | Q8L7R2 | 3702  |
| D5G8E5 | 39416  | A7EEW4 | 665079 | Q92209 | 5476  |
| D6VUZ1 | 559292 | A7F680 | 665079 | Q9HEA2 | 5141  |
| D7FPS7 | 2880   | A7TKZ0 | 436907 | Q9XEE0 | 3702  |
| O74382 | 4896   | A8BFR5 | 184922 |        |       |
| O82796 | 3702   | A8I9R1 | 3055   |        |       |
| P42941 | 4932   | A8N6Z1 | 240176 |        |       |
| P78330 | 9606   | A8PY36 | 425265 |        |       |
| Q014M9 | 70448  | A8WNC1 | 6238   |        |       |
| Q0CC21 | 341663 | A9TYA8 | 145481 |        |       |
| Q0IHZ7 | 8364   | B0D0M2 | 486041 |        |       |
| Q0MYU8 | 2903   | B0E7X3 | 370354 |        |       |
| Q0U8Y6 | 13684  | B0WUZ1 | 7176   |        |       |
| Q17M48 | 7159   | B3M069 | 7217   |        |       |
| Q17M49 | 7159   | B3P1R0 | 7220   |        |       |
| Q17M50 | 7159   | B4FIW6 | 4577   |        |       |
| Q26545 | 6183   | B4GP49 | 7234   |        |       |
| Q29FA2 | 46245  | B4HKF1 | 7238   |        |       |
| Q2H472 | 38033  | B4JI58 | 7222   |        |       |
| Q2KHU0 | 9913   | B4K4Y7 | 7230   |        |       |
| Q2QQ95 | 39947  | B4LW10 | 7244   |        |       |
| Q2R0W7 | 39947  | B4NAJ0 | 7260   |        |       |
| Q2U4H1 | 5062   | B4PUM3 | 7245   |        |       |
| Q498V7 | 7955   | B4QWN7 | 7240   |        |       |
| Q4WWP0 | 5085   | B6GW79 | 500485 |        |       |
| Q54ES3 | 44689  | B6H312 | 500485 |        |       |
| Q5A0H3 | 5476   | B6H461 | 500485 |        |       |
| Q5M819 | 10116  | B7FV67 | 556484 |        |       |
| Q5RB83 | 9601   | B8N9L9 | 332952 |        |       |
| Q5RCQ7 | 9601   | B8NEE4 | 332952 |        |       |
| Q6BJA8 | 4959   | B8P126 | 561896 |        |       |
| Q6CDX6 | 4952   | B8PIK6 | 561896 |        |       |
| Q6CN02 | 28985  | B9MTL7 | 3694   |        |       |
| Q6DFU1 | 8355   | B9SRK6 | 3988   |        |       |
| Q6FND4 | 5478   | B9WBR7 | 573826 |        |       |
| Q75CP9 | 33169  | C3Y9T1 | 7739   |        |       |
| Q7SFM8 | 5141   | C4JHR3 | 336963 |        |       |
| Q95Q10 | 6239   | C4JWT5 | 336963 |        |       |
| Q99LS3 | 10090  | C4LUI9 | 5759   |        |       |
| Q9U1W6 | 6239   | C4LVZ3 | 5759   |        |       |
| Q9U1W7 | 6239   | C4Q4Y7 | 6183   |        |       |
| Q9VSY6 | 7227   | C4QXV5 | 644223 |        |       |

|        |      |        |        |
|--------|------|--------|--------|
| Q9XEQ8 | 4558 | C4Y8M5 | 306902 |
|        |      | C5DCQ0 | 559295 |
|        |      | C5DQT2 | 559307 |
|        |      | C5M6K9 | 294747 |
|        |      | C5WN25 | 4558   |
|        |      | D2VDG8 | 5762   |
|        |      | D3DLZ2 | 559292 |
|        |      | O94634 | 4896   |
|        |      | Q0U0P1 | 13684  |
|        |      | Q0V4E4 | 13684  |
|        |      | Q17F43 | 7159   |
|        |      | Q17F44 | 7159   |
|        |      | Q21080 | 6239   |
|        |      | Q22B57 | 312017 |
|        |      | Q23ML3 | 312017 |
|        |      | Q23WP3 | 312017 |
|        |      | Q29BL4 | 46245  |
|        |      | Q2UGQ4 | 5062   |
|        |      | Q4P450 | 5270   |
|        |      | Q4WP28 | 5085   |
|        |      | Q4WP60 | 5085   |
|        |      | Q4WYW2 | 5085   |
|        |      | Q55JX2 | 5207   |
|        |      | Q5B6K0 | 162425 |
|        |      | Q5K9M8 | 5207   |
|        |      | Q6CAI4 | 4952   |
|        |      | Q6CMJ3 | 28985  |
|        |      | Q6FQM1 | 5478   |
|        |      | Q75BN9 | 33169  |
|        |      | Q7PQF6 | 7165   |
|        |      | Q7S456 | 5141   |
|        |      | Q86AP7 | 44689  |
|        |      | Q86ZL8 | 5145   |
|        |      | Q95XY8 | 6239   |
|        |      | Q9VHF0 | 7227   |
|        |      | Q9ZSS6 | 3702   |
|        |      | A0D3F4 | 5888   |
|        |      | A0D573 | 5888   |
|        |      | A0E6U7 | 5888   |
|        |      | A0FKE6 | 4081   |
|        |      | A1CH94 | 5057   |
|        |      | A1CXJ1 | 331117 |
|        |      | A1D414 | 331117 |
|        |      | A2FH13 | 5722   |
|        |      | A2QU10 | 425011 |
|        |      | A2XWA9 | 39946  |

|        |        |
|--------|--------|
| A4QUE4 | 148305 |
| A5HUN0 | 4513   |
| A6RBB5 | 339724 |
| A6RGX2 | 339724 |
| A6ZR41 | 307796 |
| A7A071 | 307796 |
| A7RTQ7 | 45351  |
| A8J977 | 3055   |
| A9NZE1 | 3332   |
| A9PI64 | 3694   |
| A9T7L7 | 145481 |
| B0EJK9 | 370354 |
| B0EK81 | 370354 |
| B0XZX9 | 451804 |
| B0Y5X4 | 451804 |
| B0Y607 | 451804 |
| B1N2N4 | 5759   |
| B1X3V5 | 39717  |
| B2WAH4 | 426418 |
| B2WP86 | 426418 |
| B3LQP1 | 285006 |
| B3LRK3 | 285006 |
| B5VHL2 | 545124 |
| B5VLU7 | 545124 |
| B6H3S9 | 500485 |
| B6QHL6 | 441960 |
| B6QVU8 | 441960 |
| B7FKK4 | 3880   |
| B7G9B5 | 556484 |
| B8C651 | 35128  |
| B8CA45 | 35128  |
| B8LQZ5 | 3332   |
| B8LR80 | 3332   |
| B8MJJ4 | 441959 |
| B8MTE8 | 441959 |
| B8N9Q5 | 332952 |
| B8NXW6 | 332952 |
| B9FB69 | 39947  |
| B9GKJ4 | 3694   |
| B9P9D4 | 3694   |
| B9RC97 | 3988   |
| B9TLI3 | 3988   |
| C0NUL1 | 447093 |
| C0NZL1 | 447093 |
| C0RYW0 | 482561 |
| C0SHC7 | 482561 |



|        |        |
|--------|--------|
| C1E7U4 | 296587 |
| C1G792 | 502780 |
| C1GGJ3 | 502780 |
| C1GX28 | 502779 |
| C1GYL4 | 502779 |
| C1MX69 | 564608 |
| C1MZ44 | 564608 |
| C4YIT5 | 5476   |
| C5FMW6 | 554155 |
| C5FSQ8 | 554155 |
| C5GDJ4 | 559297 |
| C5GRI2 | 559297 |
| C5JIT2 | 559298 |
| C5JRJ5 | 559298 |
| C5P446 | 222929 |
| C5PCI1 | 222929 |
| C6H216 | 544712 |
| C6HPI2 | 544712 |
| C6LRX6 | 598745 |
| C7GIZ5 | 574961 |
| C7GRR8 | 574961 |
| C7YIV4 | 660122 |
| C7YRV2 | 660122 |
| C7ZH37 | 660122 |
| C8V6G4 | 227321 |
| C8VPK7 | 227321 |
| C8Z799 | 643680 |
| C8ZBW2 | 643680 |
| D0MT19 | 403677 |
| D0N7P9 | 403677 |
| D3B961 | 670386 |
| D4AVK5 | 663331 |
| D4DDK1 | 663202 |
| D6VWY5 | 559292 |
| D6WSN2 | 7070   |
| D7L8V0 | 81972  |
| D7LZN3 | 81972  |
| O42615 | 37620  |
| O59791 | 4896   |
| P00927 | 4932   |
| P25306 | 4081   |
| P36007 | 4932   |
| Q0CLP5 | 341663 |
| Q0CS26 | 341663 |
| Q10DZ5 | 39947  |
| Q2GMH0 | 38033  |

|        |        |
|--------|--------|
| Q2HGP8 | 38033  |
| Q2PGG3 | 3702   |
| Q2TYD7 | 5062   |
| Q2U839 | 5062   |
| Q2UGM2 | 5062   |
| Q39469 | 3827   |
| Q4QJ04 | 5664   |
| Q59P56 | 5476   |
| Q5B6G4 | 162425 |
| Q5BAA5 | 162425 |
| Q6BMV7 | 4959   |
| Q6CE17 | 4952   |
| Q6JAG1 | 4558   |
| Q7XSN8 | 39947  |
| Q86QZ7 | 5741   |
| Q8GUG5 | 3702   |
| Q8GW70 | 3702   |
| Q8W314 | 39947  |
| Q8X0J0 | 5141   |
| Q9AUQ1 | 4530   |
| Q9AXU4 | 49451  |
| Q9T0D1 | 3702   |

| <b>threonine synthase</b> |             | <b>3-deoxy-7-phosphoheptulonate synthase</b> |             | <b>3-dehydroquininate synthase</b> |             |
|---------------------------|-------------|----------------------------------------------|-------------|------------------------------------|-------------|
| <b>UniProt</b>            | <b>TXID</b> | <b>UniProt</b>                               | <b>TXID</b> | <b>UniProt</b>                     | <b>TXID</b> |
| A1CK16                    | 5057        | A0BP53                                       | 5888        | Q8VYV7                             | 3702        |
| A1D7F2                    | 331117      | A0D7I3                                       | 5888        | D7MN11                             | 81972       |
| A2ETD5                    | 5722        | A0DJH3                                       | 5888        | Q30D01                             | 28930       |
| A2R773                    | 425011      | A0MH68                                       | 4058        | Q8RU74                             | 4081        |
| A2ZWT5                    | 39947       | A1CCF4                                       | 5057        | B9VU86                             | 29760       |
| A3LVC4                    | 4924        | A1CD93                                       | 5057        | A5B6G3                             | 29760       |
| A4H7J4                    | 5660        | A1CHI4                                       | 5057        | B9MXD6                             | 3694        |
| A4HVX7                    | 5671        | A1CS77                                       | 5057        | A9PE59                             | 3694        |
| A4RLU0                    | 148305      | A1CTE9                                       | 5057        | B9MXD7                             | 3694        |
| A4RVS2                    | 436017      | A1CUX4                                       | 331117      | C6TGX4                             | 3847        |
| A4RZC1                    | 436017      | A1CX96                                       | 331117      | B7FJL5                             | 3880        |
| A5DAD5                    | 4929        | A1D550                                       | 331117      | A2Z3J8                             | 39946       |
| A5E244                    | 36914       | A1DC71                                       | 331117      | B4FS26                             | 4577        |
| A6QTT7                    | 339724      | A2Q900                                       | 425011      | B6SJH0                             | 4577        |
| A6S215                    | 332648      | A2QII3                                       | 425011      | C5X6V7                             | 4558        |
| A6ZTN2                    | 307796      | A2R1A6                                       | 425011      | Q651F0                             | 39947       |
| A7F7A3                    | 665079      | A2YNU0                                       | 39946       | A9NUF2                             | 3332        |
| A7TT30                    | 436907      | A2YWD9                                       | 39946       | B8LRA2                             | 3332        |
| A8HZZ1                    | 3055        | A2ZAB4                                       | 39946       | A9RZH3                             | 145481      |
| A8NZN1                    | 240176      | A3C7D9                                       | 39947       | A8J463                             | 3055        |

|        |        |        |        |        |        |
|--------|--------|--------|--------|--------|--------|
| A8QD54 | 425265 | A3GG00 | 4924   | C1FE63 | 296587 |
| A9S5B7 | 145481 | A3LTF4 | 4924   | A4RXC8 | 436017 |
| A9SSV5 | 145481 | A4QYK1 | 148305 | Q019I7 | 70448  |
| A9TLR9 | 145481 | A4RQ73 | 148305 | B8BZI6 | 35128  |
| A9V4R9 | 81824  | A4RZ54 | 436017 | C1MKZ4 | 564608 |
| B0D421 | 486041 | A5C138 | 29760  | B9SUG6 | 3988   |
| B0XY96 | 451804 | A5DA85 | 4929   | B7G177 | 556484 |
| B1X4H4 | 39717  | A5DHG5 | 4929   | A1C9L3 | 5057   |
| B2B1N9 | 5145   | A5DUT1 | 36914  | A4RGL5 | 148305 |
| B2G3X2 | 4956   | A5DWM2 | 36914  | A6RS33 | 332648 |
| B2G4S4 | 4956   | A6R0W3 | 339724 | A7ESN1 | 665079 |
| B2VTP3 | 426418 | A6RB56 | 339724 | B6TGN6 | 4577   |
| B3LUB6 | 285006 | A6REQ1 | 339724 | B8BVV0 | 35128  |
| B6HD87 | 500485 | A6RHV6 | 332648 | C8V0N3 | 227321 |
| B6JVL7 | 402676 | A6RIN5 | 332648 | Q4PE60 | 5270   |
| B6KQ11 | 508771 | A6RX11 | 332648 | Q5AME2 | 5476   |
| B6QVH8 | 441960 | A6ZLI8 | 307796 | A5H2P4 | 36914  |
| B6THZ8 | 4577   | A6ZY03 | 307796 | A5H2Q8 | 36914  |
| B6TPP7 | 4577   | A7EFK5 | 665079 | B1X3Q4 | 39717  |
| B7G9C6 | 556484 | A7EHE7 | 665079 | B2VZE7 | 426418 |
| B8A807 | 39946  | A7F5B6 | 665079 | B4G168 | 4577   |
| B8AWH3 | 39946  | A7TEB1 | 436907 | B4G1Z7 | 4577   |
| B8BRC6 | 296543 | A7TTE0 | 436907 | B7ZXL4 | 4577   |
| B8CBR8 | 35128  | A8J6Q7 | 3055   | B9WFG1 | 573826 |
| B8MTK3 | 441959 | A8NJE5 | 240176 | C4R4R8 | 644223 |
| B8NMR6 | 332952 | A8NR52 | 240176 | C5M1X2 | 294747 |
| B9N1A4 | 3694   | A8PZM8 | 425265 | C7ZD11 | 660122 |
| B9Q3R4 | 5811   | A8Q6A5 | 425265 | C9SUJ9 | 526221 |
| B9QH30 | 432359 | A8QAQ6 | 425265 | D5G8D9 | 39416  |
| B9RK44 | 3988   | A8QD78 | 425265 | Q0UXE1 | 13684  |
| B9S5U4 | 3988   | A9NUF5 | 3332   | Q5AMU6 | 5476   |
| B9WHF0 | 573826 | A9NUN2 | 3332   | Q5AZ77 | 162425 |
| C0NNN6 | 447093 | A9NZV0 | 3332   | Q6C1X5 | 4952   |
| C0P6C5 | 4577   | A9PF21 | 3694   | Q8LFK9 | 3702   |
| C0RY59 | 482561 | A9RCS4 | 145481 | Q9FKX0 | 3702   |
| C1E0J2 | 296587 | A9RQX9 | 145481 |        |        |
| C1FFY5 | 296587 | A9RYQ7 | 145481 |        |        |
| C1G6H2 | 502780 | A9S036 | 145481 |        |        |
| C1HA31 | 502779 | A9SGL2 | 145481 |        |        |
| C1MQ40 | 564608 | A9TK65 | 145481 |        |        |
| C4JTQ2 | 336963 | A9TZP0 | 145481 |        |        |
| C4R057 | 644223 | A9VE96 | 81824  |        |        |
| C4Y559 | 306902 | B0CVS7 | 486041 |        |        |
| C4YRB0 | 5476   | B0D7J1 | 486041 |        |        |
| C5DBY5 | 559295 | B0DV44 | 486041 |        |        |
| C5DVQ5 | 559307 | B0XRH5 | 451804 |        |        |

|        |        |        |        |
|--------|--------|--------|--------|
| C5FH22 | 554155 | B0Y669 | 451804 |
| C5GIS3 | 559297 | B0YCB5 | 451804 |
| C5JGG1 | 559298 | B0YF87 | 451804 |
| C5KRV1 | 423536 | B1X4G2 | 39717  |
| C5MHG4 | 294747 | B2AAC1 | 5145   |
| C5P123 | 222929 | B2AQP5 | 5145   |
| C5XHG5 | 4558   | B2AYX6 | 5145   |
| C5YUZ5 | 4558   | B2VX29 | 426418 |
| C6HFX5 | 544712 | B2VZZ7 | 426418 |
| C7GJT3 | 574961 | B2WBX0 | 426418 |
| C7Z694 | 660122 | B2WF53 | 426418 |
| C8VIU2 | 227321 | B3LGN0 | 285006 |
| C8Z4E5 | 643680 | B3LMR3 | 285006 |
| C9ZT46 | 679716 | B4FMU0 | 4577   |
| D0NJP0 | 403677 | B4FZ59 | 4577   |
| D1ZU84 | 5147   | B5VEJ9 | 545124 |
| D3BUK1 | 670386 | B5VFT8 | 545124 |
| D4B5N4 | 663331 | B6HB61 | 500485 |
| D4D679 | 663202 | B6HMQ2 | 500485 |
| D5GJK7 | 39416  | B6HTS2 | 500485 |
| D6VR61 | 559292 | B6JV24 | 402676 |
| D7KR40 | 81972  | B6K4L8 | 402676 |
| D7MCH0 | 81972  | B6KQ33 | 508771 |
| P16120 | 4932   | B6Q8J3 | 441960 |
| Q00063 | 33169  | B6QE84 | 441960 |
| Q01B87 | 70448  | B6QLB1 | 441960 |
| Q0CIS5 | 341663 | B6T4J7 | 4577   |
| Q0UMX8 | 13684  | B6TUB8 | 4577   |
| Q2GV42 | 38033  | B6UAK5 | 4577   |
| Q2Q021 | 3847   | B7FRJ9 | 556484 |
| Q2U324 | 5062   | B8ARY1 | 39946  |
| Q42598 | 4896   | B8BVC7 | 35128  |
| Q4DIK8 | 5693   | B8LDP4 | 296543 |
| Q4DLL4 | 5693   | B8LMP9 | 3332   |
| Q4P6C2 | 5270   | B8LZB9 | 441959 |
| Q4QFV0 | 5664   | B8MB35 | 441959 |
| Q4WXC3 | 5085   | B8MB36 | 441959 |
| Q57X55 | 5691   | B8MB37 | 441959 |
| Q5AGE6 | 5476   | B8MHZ1 | 441959 |
| Q5B8U9 | 162425 | B8MVY2 | 332952 |
| Q5KMM7 | 5207   | B8MYJ8 | 332952 |
| Q66RI3 | 4932   | B8N9E7 | 332952 |
| Q6BKV1 | 4959   | B8PCB8 | 561896 |
| Q6C0N3 | 4952   | B9GUY5 | 3694   |
| Q6CTY8 | 28985  | B9MUW0 | 3694   |
| Q6FMB9 | 5478   | B9PYJ3 | 5811   |

|        |       |        |        |
|--------|-------|--------|--------|
| Q6L4H5 | 39947 | B9RJN2 | 3988   |
| Q8LJJ2 | 39947 | B9SZ06 | 3988   |
| Q8X0K4 | 5141  | B9T0A7 | 3988   |
| Q96VZ4 | 5207  | B9VU85 | 29760  |
| Q9MT28 | 4113  | B9W7T3 | 573826 |
| Q9S7B5 | 3702  | B9WAP2 | 573826 |
| Q9SSP5 | 3702  | C0NQD6 | 447093 |
|        |       | C0NV96 | 447093 |
|        |       | C0P1C9 | 447093 |
|        |       | C0RZ23 | 482561 |
|        |       | C0S2T2 | 482561 |
|        |       | C0SFV6 | 482561 |
|        |       | C1DYV8 | 296587 |
|        |       | C1G0J6 | 502780 |
|        |       | C1G7F9 | 502780 |
|        |       | C1GS88 | 502779 |
|        |       | C1GXV4 | 502779 |
|        |       | C1H5Y6 | 502779 |
|        |       | C1N1Q4 | 564608 |
|        |       | C4J284 | 4577   |
|        |       | C4JG84 | 336963 |
|        |       | C4JJ23 | 336963 |
|        |       | C4JU93 | 336963 |
|        |       | C4QXT0 | 644223 |
|        |       | C4R611 | 644223 |
|        |       | C4XWJ8 | 306902 |
|        |       | C4XX57 | 306902 |
|        |       | C4YED0 | 5476   |
|        |       | C5DE97 | 559295 |
|        |       | C5DX11 | 559307 |
|        |       | C5E1L8 | 559307 |
|        |       | C5E2I8 | 559295 |
|        |       | C5FC05 | 554155 |
|        |       | C5FGE6 | 554155 |
|        |       | C5GPH0 | 559297 |
|        |       | C5GSH6 | 559297 |
|        |       | C5GTI8 | 559297 |
|        |       | C5JDU9 | 559298 |
|        |       | C5JL00 | 559298 |
|        |       | C5JWU9 | 559298 |
|        |       | C5LMC8 | 423536 |
|        |       | C5M0P6 | 423536 |
|        |       | C5M6E4 | 294747 |
|        |       | C5MEN4 | 294747 |
|        |       | C5NZE4 | 222929 |
|        |       | C5P018 | 222929 |

|        |        |
|--------|--------|
| C5PJP4 | 222929 |
| C5WRG8 | 4558   |
| C5WXQ3 | 4558   |
| C5X2H5 | 4558   |
| C5YJQ4 | 4558   |
| C6H299 | 544712 |
| C6HHK1 | 544712 |
| C6HS65 | 544712 |
| C6TJC2 | 3847   |
| C7GMY2 | 574961 |
| C7GQ13 | 574961 |
| C7YHC2 | 660122 |
| C7YLD6 | 660122 |
| C7YWA2 | 660122 |
| C8VFP0 | 227321 |
| C8VNS1 | 227321 |
| C8Z4V7 | 643680 |
| C9K7C8 | 5599   |
| C9SIM7 | 526221 |
| C9SQE6 | 526221 |
| C9SQE7 | 526221 |
| D0MU15 | 403677 |
| D0NYT8 | 403677 |
| D0VBC5 | 29760  |
| D1Z3F5 | 5147   |
| D3UEZ6 | 643680 |
| D3YIJ4 | 119830 |
| D4ANK0 | 663331 |
| D4ANV0 | 663331 |
| D4CZ80 | 663202 |
| D4DBP2 | 663202 |
| D5G4I3 | 39416  |
| D5G834 | 39416  |
| D5GF45 | 39416  |
| D6RL96 | 240176 |
| D6VQP5 | 559292 |
| D6VS23 | 559292 |
| D7KLQ8 | 81972  |
| D7M8Q4 | 81972  |
| D7M981 | 81972  |
| O22407 | 4043   |
| O24046 | 43522  |
| O24051 | 43522  |
| O24052 | 43522  |
| P14843 | 4932   |
| P21357 | 4113   |

|        |        |
|--------|--------|
| P27608 | 4097   |
| P29976 | 3702   |
| P32449 | 4932   |
| P34725 | 5476   |
| P37215 | 4081   |
| P37216 | 4081   |
| P37822 | 4113   |
| P79023 | 5476   |
| P80576 | 5141   |
| Q00218 | 3702   |
| Q09755 | 4896   |
| Q0CB67 | 341663 |
| Q0CN52 | 341663 |
| Q0D4J5 | 39947  |
| Q0DRF3 | 39947  |
| Q0UWH1 | 13684  |
| Q0V1K6 | 13684  |
| Q0V4Y8 | 13684  |
| Q0VHY4 | 5911   |
| Q10KC0 | 39947  |
| Q2A710 | 120017 |
| Q2GTA2 | 38033  |
| Q2HDD0 | 38033  |
| Q2HG98 | 38033  |
| Q2UGW7 | 5062   |
| Q2URC2 | 5062   |
| Q2UTB3 | 5062   |
| Q30D02 | 28930  |
| Q336R7 | 39947  |
| Q4G2J0 | 71150  |
| Q4P9Q3 | 5270   |
| Q4PBX8 | 5270   |
| Q4PD03 | 5270   |
| Q4W9G6 | 5085   |
| Q4WG78 | 5085   |
| Q4WKK9 | 5085   |
| Q4WPC4 | 5085   |
| Q55MJ1 | 5207   |
| Q55W33 | 5207   |
| Q570U9 | 3702   |
| Q5ALQ9 | 5476   |
| Q5BCQ7 | 162425 |
| Q5BGH6 | 162425 |
| Q5EMW0 | 148305 |
| Q5K879 | 5207   |
| Q5KHW1 | 5207   |

|        |        |
|--------|--------|
| Q5KK60 | 5207   |
| Q6BIP1 | 4959   |
| Q6BZ40 | 4959   |
| Q6CCS4 | 4952   |
| Q6CDP1 | 4952   |
| Q6CDZ3 | 4952   |
| Q6CJG9 | 28985  |
| Q6CL12 | 28985  |
| Q6FRA6 | 5478   |
| Q6FX01 | 5478   |
| Q6YTT3 | 39947  |
| Q754W4 | 33169  |
| Q75DX5 | 33169  |
| Q75LR2 | 39947  |
| Q75W16 | 39947  |
| Q7S715 | 5141   |
| Q7SCQ0 | 5141   |
| Q7YW56 | 5811   |
| Q8H708 | 4787   |
| Q8H9C9 | 4113   |
| Q8LAR5 | 3702   |
| Q9AY42 | 4530   |
| Q9HEZ8 | 162425 |
| Q9HEZ9 | 162425 |
| Q9SK84 | 3702   |
| Q9UT09 | 4896   |

| <b>Pentafunctional AROM polypeptide</b> |             | <b>3-dehydroquinate dehydratase I/shikimate 5-dehydrogenase</b> |             | <b>shikimate kinase</b> |             |
|-----------------------------------------|-------------|-----------------------------------------------------------------|-------------|-------------------------|-------------|
| <b>UniProt</b>                          | <b>TXID</b> | <b>UniProt</b>                                                  | <b>TXID</b> | <b>UniProt</b>          | <b>TXID</b> |
| P08566                                  | 4932        | Q9SQT8                                                          | 3702        | A8MRG1                  | 3702        |
| D6VSB3                                  | 559292      | D7L5G1                                                          | 81972       | Q9SJ05                  | 3702        |
| C8Z543                                  | 643680      | B9RSY7                                                          | 3988        | Q8GY88                  | 3702        |
| B3LGE9                                  | 285006      | B9HSF2                                                          | 3694        | Q9SVA4                  | 3702        |
| A6ZY89                                  | 307796      | Q30D00                                                          | 28930       | D7LCM2                  | 81972       |
| C7GIN5                                  | 574961      | A5ATW2                                                          | 29760       | Q30CZ9                  | 28930       |
| C5DVG6                                  | 559307      | D2KBA9                                                          | 4113        | A5AZY1                  | 29760       |
| Q6FIV4                                  | 5478        | O65917                                                          | 4081        | B9VU88                  | 29760       |
| C5DN02                                  | 559295      | Q6PUF9                                                          | 4097        | B9HG21                  | 3694        |
| Q6CJC4                                  | 28985       | C8KH58                                                          | 35925       | Q00497                  | 4081        |
| Q74ZZ1                                  | 33169       | B8LLR2                                                          | 3332        | C6TLJ4                  | 3847        |
| C5M1X2                                  | 294747      | A9NUR4                                                          | 3332        | B4F8E9                  | 4577        |
| C4R4R8                                  | 644223      | B6TSW1                                                          | 4577        | B6TNA7                  | 4577        |
| C4Y9D5                                  | 306902      | B4FAK2                                                          | 4577        | Q7X7H9                  | 39947       |
| B9WFG1                                  | 573826      | B4FH30                                                          | 4577        | Q01HY3                  | 4530        |



|        |        |        |        |        |        |
|--------|--------|--------|--------|--------|--------|
| A3LSZ2 | 4924   | B4FN22 | 4577   | Q5JQX9 | 4530   |
| Q5AMU6 | 5476   | B6UCV5 | 4577   | B8B486 | 39946  |
| Q5AME2 | 5476   | B8BM99 | 39946  | A2X9M5 | 39946  |
| A5H2Q8 | 36914  | B8A8A3 | 39946  | B8AV75 | 39946  |
| A5H2P4 | 36914  | C5YPB6 | 4558   | C5Y8Y1 | 4558   |
| Q6C1X5 | 4952   | C5XLB0 | 4558   | B9T204 | 3988   |
| C7YZ74 | 660122 | B9GDI1 | 39947  | A9NUN9 | 3332   |
| D5G8D9 | 39416  | Q5ZCV1 | 39947  | A8IGF0 | 3055   |
| Q8X071 | 5141   | A9S495 | 145481 | A9SQ82 | 145481 |
| D1ZA70 | 5147   | C1FDQ3 | 296587 | C1EGE2 | 296587 |
| A7F7H0 | 665079 | A8IZ72 | 3055   | B7GAC8 | 556484 |
| B2B223 | 5145   | A4S5X6 | 436017 | B8C8C4 | 296543 |
| Q5XNP0 | 5180   | Q00XP3 | 70448  | D7M8K9 | 81972  |
| Q9P7R0 | 4896   | B3VLC1 | 332125 | Q00VP6 | 70448  |
| A4RD09 | 148305 | B9I9X4 | 3694   | B9GT47 | 3694   |
| B6JVD0 | 402676 | B9REX9 | 3988   | Q0DXJ9 | 39947  |
| C9SE96 | 526221 | A2WQ65 | 39946  | Q5AME2 | 5476   |
| B6QCA7 | 441960 | A5ATW0 | 29760  | A5DK69 | 4929   |
| B6QWH9 | 441960 | A5ATW1 | 29760  | A5H2P4 | 36914  |
| A1D244 | 331117 | B9I835 | 3694   | A5H2Q8 | 36914  |
| B8M0U4 | 441959 | B9MZN1 | 3694   | B4FPS0 | 4577   |
| B8N4Q9 | 332952 | B9REY0 | 3988   | B6UDH4 | 4577   |
| C5PA86 | 222929 | B9REY1 | 3988   | B9F302 | 39947  |
| Q4WS76 | 5085   | B9REY2 | 3988   | B9FSA8 | 39947  |
| Q8TFZ0 | 5085   | B9S3X5 | 3988   | B9NKZ2 | 3694   |
| B0XRM8 | 451804 | C5YPB7 | 4558   | B9WFG1 | 573826 |
| B6HAA7 | 500485 | Q0JMN4 | 39947  | C0PNT9 | 4577   |
| P07547 | 162425 | Q6PUG0 | 4097   | C4R4R8 | 644223 |
| Q2UCP6 | 5062   |        |        | C5M1X2 | 294747 |
| A1CP85 | 5057   |        |        | C6THS3 | 3847   |
| Q0D0F3 | 341663 |        |        | D5G8D9 | 39416  |
| D4D596 | 663202 |        |        | Q5AMU6 | 5476   |
| D4ALM9 | 663331 |        |        | Q5NTH3 | 39947  |
| C5FQ73 | 554155 |        |        | Q5NTH4 | 39947  |
| C0S433 | 482561 |        |        | Q6C1X5 | 4952   |
| Q0V3H0 | 13684  |        |        |        |        |
| A5DK69 | 4929   |        |        |        |        |
| C4JYG6 | 336963 |        |        |        |        |
| C5JKE6 | 559298 |        |        |        |        |
| C5G8R4 | 559297 |        |        |        |        |
| C0NL63 | 447093 |        |        |        |        |
| C6HCG7 | 544712 |        |        |        |        |
| Q8J294 | 107832 |        |        |        |        |
| B0D6H2 | 486041 |        |        |        |        |
| Q5KME5 | 5207   |        |        |        |        |
| Q2GP00 | 38033  |        |        |        |        |

|        |        |
|--------|--------|
| Q12659 | 4754   |
| A8NMB4 | 240176 |
| Q4P8F6 | 5270   |
| A8QCB2 | 425265 |
| A9V1N3 | 81824  |
| D0NXA2 | 403677 |
| C1FYJ9 | 502780 |
| C1H8L1 | 502779 |
| A6R8Q8 | 339724 |
| B2VVY2 | 426418 |
| Q0VIN9 | 5911   |
| A0C9W9 | 5888   |
| A0DH09 | 5888   |
| C5LBY1 | 423536 |
| B7FY07 | 556484 |
| A5DK70 | 4929   |
| B2VVY3 | 426418 |
| B8BW72 | 35128  |
| C8VRD2 | 227321 |

**3-phosphoshikimate 1-carboxyvinyltransferase**

| UniProt | TXID   |
|---------|--------|
| Q9FVP6  | 3702   |
| D7KD66  | 81972  |
| A4SB81  | 436017 |
| A8JH48  | 3055   |
| A9SYF9  | 145481 |
| B7FSS5  | 556484 |
| B8BW66  | 35128  |
| B9GPE8  | 3694   |
| B9RDA3  | 3988   |
| C5Z3D1  | 4558   |
| P05466  | 3702   |
| Q5AME2  | 5476   |
| Q5VNW0  | 39947  |
| A2T9R8  | 3046   |
| A2Y8X9  | 39946  |
| A3B841  | 39947  |
| A5C3Y3  | 29760  |
| A5DK69  | 4929   |
| A5H2P4  | 36914  |
| A5H2Q8  | 36914  |
| A7Y7Y2  | 3635   |
| A9P0E4  | 3332   |

**chorismate synthase**

| UniProt | TXID   |
|---------|--------|
| P28777  | 4932   |
| D6VU01  | 559292 |
| C8Z8A2  | 643680 |
| C7GPQ5  | 574961 |
| B5VII2  | 545124 |
| B3LHK3  | 285006 |
| A6ZU35  | 307796 |
| Q6FV38  | 5478   |
| Q6CNY1  | 28985  |
| C5DL16  | 559295 |
| A7TIP8  | 436907 |
| C5DPE2  | 559307 |
| Q75B59  | 33169  |
| C4XZV9  | 306902 |
| Q6BQN1  | 4959   |
| A5DJM9  | 4929   |
| C4R1A7  | 644223 |
| B9WMG9  | 573826 |
| Q59K34  | 5476   |
| C4YMI5  | 5476   |
| A3LYZ8  | 4924   |
| C5M8C8  | 294747 |

**bifunctional indole-3-glycerol phosphate synthase/anthranilate synthase component II**

| UniProt | TXID   |
|---------|--------|
| P00937  | 4932   |
| D6VWZ2  | 559292 |
| C8ZBW9  | 643680 |
| B5VLV6  | 545124 |
| B3LQP8  | 285006 |
| A7A078  | 307796 |
| C7GJ02  | 574961 |
| C5DZ89  | 559307 |
| Q6FUV9  | 5478   |
| A7TE28  | 436907 |
| Q6CV69  | 28985  |
| C5DC85  | 559295 |
| Q6C9H7  | 4952   |
| C4R637  | 644223 |
| Q755S2  | 33169  |
| P20409  | 4837   |
| B9W9L6  | 573826 |
| Q5A3M7  | 5476   |
| C4YGA0  | 5476   |
| C5MBQ8  | 294747 |
| D5GHJ8  | 39416  |
| B2AXK8  | 5145   |

|        |        |        |        |        |        |
|--------|--------|--------|--------|--------|--------|
| B2C1I9 | 3635   | A5E0D5 | 36914  | P00908 | 5141   |
| B2CM20 | 480913 | Q6C8Q1 | 4952   | Q2H6W2 | 38033  |
| B3GGJ9 | 4123   | B6H629 | 500485 | C9SP56 | 526221 |
| B5M6A1 | 4565   | D5GMG1 | 39416  | B2WJ92 | 426418 |
| B8XU22 | 3635   | B6K4C9 | 402676 | A7F349 | 665079 |
| B9WFG1 | 573826 | A1CQW8 | 5057   | A6RML4 | 332648 |
| C1EG02 | 296587 | O74413 | 4896   | C7YYQ5 | 660122 |
| C1MWX5 | 564608 | C0S9E6 | 482561 | C4XX83 | 306902 |
| C4R4R8 | 644223 | A6RUL9 | 332648 | A3LYT4 | 4924   |
| C5MIX2 | 294747 | Q4WJ77 | 5085   | Q0UCF0 | 13684  |
| C8YXI5 | 107608 | B0XPR6 | 451804 | A4R8N0 | 148305 |
| C8YXI6 | 107608 | C1GBW5 | 502780 | C4JLE2 | 336963 |
| C8YYL6 | 277990 | C5JIX7 | 559298 | C5FHC2 | 554155 |
| C8YYL7 | 277990 | C5GEA6 | 559297 | P24773 | 5076   |
| D0VBC7 | 29760  | A1D3T1 | 331117 | B6H5A3 | 500485 |
| D3JPP9 | 309978 | C5P8X2 | 222929 | B6QCL2 | 441960 |
| D3JPQ0 | 309978 | A7EEZ6 | 665079 | B8M271 | 441959 |
| D5G8D9 | 39416  | B8ML69 | 441959 | A5DSY8 | 36914  |
| D7LCH4 | 81972  | B8LU03 | 441959 | A1CPF3 | 5057   |
| O80428 | 39947  | B6QWH7 | 441960 | C5JGB7 | 559298 |
| P10748 | 4081   | B6Q851 | 441960 | C5GII0 | 559297 |
| P11043 | 4102   | C5FEW3 | 554155 | Q0D0N0 | 341663 |
| P17688 | 3708   | C0NGC3 | 447093 | C5P5A9 | 222929 |
| P23981 | 4097   | C4JX7  | 336963 | P05328 | 5061   |
| Q00VW9 | 70448  | Q12640 | 5141   | D4DA85 | 663202 |
| Q0PKR0 | 3885   | A6R7D8 | 339724 | D4ARE5 | 663331 |
| Q1KPV4 | 91198  | C6H8B7 | 544712 | A1D2B1 | 331117 |
| Q1M157 | 16922  | Q5B149 | 162425 | B0XR95 | 451804 |
| Q30CZ8 | 28930  | C8VFK9 | 227321 | Q6MYH9 | 5085   |
| Q3ECU2 | 3702   | D1ZLW0 | 5147   | Q6BWE2 | 4959   |
| Q587N9 | 3847   | Q2UMA1 | 5062   | C1HD27 | 502779 |
| Q5AMU6 | 5476   | B8N4L8 | 332952 | A2QRH6 | 425011 |
| Q6C1X5 | 4952   | A4R7D4 | 148305 | C6HFS8 | 544712 |
| Q6E6L4 | 72917  | Q2GNE9 | 38033  | C0NNJ0 | 447093 |
| Q6E6L5 | 72917  | B2W1P0 | 426418 | C1GJ38 | 502780 |
| Q6JDV0 | 3711   | A8N225 | 240176 | C0S7N5 | 482561 |
| Q71LY8 | 3847   | C8Z2I6 | 100787 | P18483 | 105351 |
| Q8LC97 | 3702   | A8PWP1 | 425265 | Q2UCI0 | 5062   |
| Q8W1M5 | 71234  | B8P2V9 | 561896 | Q96VL5 | 71696  |
| Q93VK6 | 4530   | B0CQS1 | 486041 | B8N4X9 | 332952 |
| Q946U9 | 173162 | C7YR83 | 660122 | D1ZBC5 | 5147   |
| Q946V0 | 173162 | Q5KCY4 | 5207   | P06531 | 162425 |
|        |        | D4D2D9 | 663202 | Q92370 | 4896   |
|        |        | C1HAK5 | 502779 | Q76JQ3 | 5334   |
|        |        | D4AVG4 | 663331 | A5DER2 | 4929   |
|        |        | B2B197 | 5145   | A8N699 | 240176 |

|        |        |        |        |
|--------|--------|--------|--------|
| Q0UTJ3 | 13684  | Q96WP2 | 5341   |
| A9V1N2 | 81824  | B6JXZ5 | 402676 |
| B9SUA2 | 3988   | P25170 | 5306   |
| Q10NY1 | 39947  | Q6KCN7 | 76867  |
| B8AKA5 | 39946  | Q873X5 | 5530   |
| B4FLA2 | 4577   | P09575 | 4905   |
| B6T4U1 | 4577   | B0D0Y7 | 486041 |
| B4FRH6 | 4577   | Q9HGK1 | 38945  |
| B4FTP6 | 4577   | Q5KC22 | 5207   |
| C5WQV1 | 4558   | Q4PBY7 | 5270   |
| B5AAU3 | 112509 | A8PZV8 | 425265 |
| Q30CZ7 | 28930  | Q92411 | 5016   |
| Q42884 | 4081   | C8VS06 | 227321 |
| Q42885 | 4081   | A6QTP2 | 339724 |
| B8LL06 | 3332   | B8M8Z8 | 441959 |
| B8BT00 | 296543 | B8M8Z9 | 441959 |
| A9RTV8 | 145481 | P48261 | 2762   |
| P27793 | 3464   |        |        |
| B7FS76 | 556484 |        |        |
| A0DHI8 | 5888   |        |        |
| A1XYU5 | 39717  |        |        |
| A5APN1 | 29760  |        |        |
| B9VU84 | 29760  |        |        |
| A8J2Z6 | 3055   |        |        |
| A9PGP7 | 3694   |        |        |
| B9HLM0 | 3694   |        |        |
| C1E5R8 | 296587 |        |        |
| A4RTB7 | 436017 |        |        |
| D7KD60 | 81972  |        |        |
| Q0WUP7 | 3702   |        |        |
| P57720 | 3702   |        |        |
| Q2V4H9 | 3702   |        |        |
| Q2V4I0 | 3702   |        |        |
| Q38RG6 | 3847   |        |        |
| C1MMY6 | 564608 |        |        |
| A7T8F5 | 45351  |        |        |
| B3L7H9 | 5851   |        |        |
| B6KIM6 | 508771 |        |        |
| C6KT66 | 36329  |        |        |
| Q23FV7 | 312017 |        |        |
| Q4PER1 | 5270   |        |        |
| Q4XVI2 | 5825   |        |        |
| Q4Z596 | 5821   |        |        |
| Q7RHB8 | 73239  |        |        |
| Q8WRC8 | 5855   |        |        |
| B9PUU8 | 5811   |        |        |

|        |        |
|--------|--------|
| B9QG39 | 432359 |
| C9SJN6 | 526221 |
| D0MU16 | 403677 |
| O02607 | 5811   |
| O15864 | 5833   |
| Q0CTR0 | 341663 |
| Q4X9S6 | 5825   |

**anthranilate  
phosphoribosyltransferase**

| UniProt | TXID   |
|---------|--------|
| A1CIC4  | 5057   |
| A1CWD6  | 331117 |
| A2Q9B1  | 425011 |
| A2XBZ0  | 39946  |
| A3GEY1  | 4924   |
| A4QT64  | 148305 |
| A4RYP9  | 436017 |
| A5B8K2  | 29760  |
| A5DM37  | 4929   |
| A5E7Q9  | 36914  |
| A6QVU0  | 339724 |
| A6RR68  | 332648 |
| A6ZYV4  | 307796 |
| A7EN33  | 665079 |
| A7THU8  | 436907 |
| A8IBN0  | 3055   |
| A8NRZ3  | 240176 |
| A8PWM8  | 425265 |
| A9T6I7  | 145481 |
| B0DQ35  | 486041 |
| B0Y4G1  | 451804 |
| B2B367  | 5145   |
| B2VTL9  | 426418 |
| B3LFU7  | 285006 |
| B4FB65  | 4577   |
| B5VGN6  | 545124 |
| B6HUC6  | 500485 |
| B6K3I2  | 402676 |
| B6QQI1  | 441960 |
| B7G4F0  | 556484 |
| B8A0L5  | 4577   |
| B8LWE3  | 441959 |
| B8N131  | 332952 |
| B9NGG3  | 3694   |
| B9RB03  | 3988   |
| B9WF64  | 573826 |

**phosphoribosylanthranilate  
isomerase**

| UniProt | TXID   |
|---------|--------|
| A3GFA8  | 4924   |
| A4Z4U7  | 4911   |
| A5DK25  | 4929   |
| A5DVR7  | 36914  |
| A6ZXX3  | 307796 |
| A7T441  | 45351  |
| A7TI73  | 436907 |
| A7ULH8  | 272698 |
| A8DWA1  | 45351  |
| A8J650  | 3055   |
| A9UKH6  | 4905   |
| B3H4J9  | 3702   |
| B3LGQ1  | 285006 |
| B4FHC1  | 4577   |
| B4FZQ3  | 4577   |
| B5VFR6  | 545124 |
| B6U7W9  | 4577   |
| B7FWK1  | 556484 |
| B8AFB5  | 39946  |
| B9HHQ7  | 3694   |
| B9I455  | 3694   |
| B9SQM9  | 3988   |
| B9W6H2  | 573826 |
| C4J8W8  | 4577   |
| C4QV11  | 644223 |
| C4Y5L4  | 306902 |
| C4YFW5  | 5476   |
| C5DNE4  | 559295 |
| C5DPN7  | 559307 |
| C5MDZ4  | 294747 |
| C5XZK5  | 4558   |
| C5Z371  | 4558   |
| C7GXY3  | 574961 |
| C8Z4S7  | 643680 |
| D6VRZ5  | 559292 |
| D7LYY8  | 81972  |

**indole-3-glycerol  
phosphate synthase**

| UniProt | TXID   |
|---------|--------|
| P49572  | 3702   |
| Q1EBW5  | 3702   |
| Q8GYM9  | 3702   |
| Q9LUB2  | 3702   |
| A8MS79  | 3702   |
| D7L7H9  | 81972  |
| B9G099  | 39947  |
| Q8H3R5  | 39947  |
| Q6K307  | 39947  |
| Q6K306  | 39947  |
| C1N2H5  | 564608 |
| D7ML37  | 81972  |
| B9T1U0  | 3988   |
| B7FI09  | 3880   |
| C0PGV5  | 4577   |
| B4G1Z5  | 4577   |
| C5YA91  | 4558   |
| Q01IS1  | 4530   |
| Q7XJW1  | 4530   |
| A9NUS4  | 3332   |
| B8AV46  | 39946  |
| B9IAU9  | 3694   |
| A9TUX8  | 145481 |
| C1DZA7  | 296587 |
| A4RZE7  | 436017 |
| A8HT60  | 3055   |
| B4FS35  | 4577   |
| B6UGU8  | 4577   |
| B8CAE6  | 35128  |
| C5X8Y0  | 4558   |
| C5Y188  | 4558   |
| B4FLA1  | 4577   |
| B7FXG0  | 556484 |
| B8B9Q2  | 39946  |
| B8BDF0  | 39946  |
| B9FFL9  | 39947  |

|        |        |        |        |        |       |
|--------|--------|--------|--------|--------|-------|
| C0NJM9 | 447093 | O13504 | 4922   | B9NGG4 | 3694  |
| C0S5A0 | 482561 | P00912 | 4932   | C0P9Q8 | 4577  |
| C1E0Z8 | 296587 | P13997 | 28985  | C4J6J4 | 4577  |
| C1G4C3 | 502780 | P43073 | 5476   | C5YJF0 | 4558  |
| C1GW67 | 502779 | P50857 | 5478   | C8TFG9 | 39946 |
| C4JSB2 | 336963 | Q01128 | 29829  |        |       |
| C4R7F6 | 644223 | Q1M2R6 | 37620  |        |       |
| C4Y377 | 306902 | Q39245 | 3702   |        |       |
| C5DJH7 | 559295 | Q39246 | 3702   |        |       |
| C5DY18 | 559307 | Q3E9L0 | 3702   |        |       |
| C5FU89 | 554155 | Q42440 | 3702   |        |       |
| C5GWR0 | 559297 | Q42527 | 3702   |        |       |
| C5JXH8 | 559298 | Q42528 | 3702   |        |       |
| C5PG24 | 222929 | Q5AB75 | 5476   |        |       |
| C5X013 | 4558   | Q5XQP9 | 114524 |        |       |
| C6HJ38 | 544712 | Q6BY13 | 4959   |        |       |
| C7GMI0 | 574961 | Q6ETX4 | 39947  |        |       |
| C7YH07 | 660122 | Q6UYC0 | 3702   |        |       |
| C8V439 | 227321 | Q757J9 | 33169  |        |       |
| C8Z5R5 | 643680 | Q875I3 | 4927   |        |       |
| C9S867 | 526221 | Q8LP19 | 3702   |        |       |
| D0NUM7 | 403677 | Q8VY51 | 3702   |        |       |
| D1ZI58 | 5147   | Q8X1D9 | 4952   |        |       |
| D4AW48 | 663331 | Q9FFF7 | 3702   |        |       |
| D4DBX8 | 663202 | Q9HFW8 | 4954   |        |       |
| D5G442 | 39416  | Q9S731 | 3702   |        |       |
| D6VSY4 | 559292 | Q9SPV7 | 3702   |        |       |
| D7FW59 | 2880   | Q9SPV8 | 3702   |        |       |
| D7LC24 | 81972  | Q9SPV9 | 3702   |        |       |
| D7LDH9 | 81972  | Q9SPW0 | 3702   |        |       |
| D7LXP9 | 81972  | Q9SPW1 | 3702   |        |       |
| O60122 | 4896   |        |        |        |       |
| P07285 | 4932   |        |        |        |       |
| Q017G3 | 70448  |        |        |        |       |
| Q02166 | 3702   |        |        |        |       |
| Q0CR19 | 341663 |        |        |        |       |
| Q0UME3 | 13684  |        |        |        |       |
| Q10SD5 | 39947  |        |        |        |       |
| Q10SD6 | 39947  |        |        |        |       |
| Q2H180 | 38033  |        |        |        |       |
| Q2UJZ6 | 5062   |        |        |        |       |
| Q4PH95 | 5270   |        |        |        |       |
| Q4WQ89 | 5085   |        |        |        |       |
| Q547D7 | 3702   |        |        |        |       |
| Q5A0Z7 | 5476   |        |        |        |       |
| Q5A168 | 5476   |        |        |        |       |

|        |        |
|--------|--------|
| Q5B746 | 162425 |
| Q5KN34 | 5207   |
| Q6BI72 | 4959   |
| Q6C7L2 | 4952   |
| Q6CMB3 | 28985  |
| Q6FY26 | 5478   |
| Q756L5 | 33169  |
| Q7RZ63 | 5141   |
| Q8S5W5 | 39947  |

| <b>tryptophan synthase</b> |             | <b>anthranilate synthase component I</b> |             | <b>anthranilate synthase component II</b> |             |
|----------------------------|-------------|------------------------------------------|-------------|-------------------------------------------|-------------|
| <b>UniProt</b>             | <b>TXID</b> | <b>UniProt</b>                           | <b>TXID</b> | <b>UniProt</b>                            | <b>TXID</b> |
| A1C701                     | 5057        | P00899                                   | 4932        | Q9FXK1                                    | 3702        |
| A1C8N4                     | 5057        | D3DLZ7                                   | 559292      | Q9FE37                                    | 3702        |
| A1CUJ3                     | 5057        | C8Z7A6                                   | 643680      | A4S3X3                                    | 436017      |
| A1DHM9                     | 331117      | C7GRS3                                   | 574961      | A8HP28                                    | 3055        |
| A1DLE7                     | 331117      | B5VHL7                                   | 545124      | A9TZ60                                    | 145481      |
| A1DMZ6                     | 331117      | B3LRK8                                   | 285006      | B6UGS8                                    | 4577        |
| A1DP73                     | 331117      | A6ZR46                                   | 307796      | B9HVR6                                    | 3694        |
| A2QC38                     | 425011      | Q6FQM6                                   | 5478        | B9SNH9                                    | 3988        |
| A2QZ07                     | 425011      | A7TMV6                                   | 436907      | C5WN01                                    | 4558        |
| A2R771                     | 425011      | C5DQU0                                   | 559307      | Q42565                                    | 3702        |
| A2RAW9                     | 425011      | Q6CMI3                                   | 28985       | Q764B9                                    | 39947       |
| A2XMX3                     | 39946       | C5DE84                                   | 559295      | Q7XUS2                                    | 39947       |
| A2XMX4                     | 39946       | C5M4E1                                   | 294747      | Q9FJM5                                    | 3702        |
| A2XMX5                     | 39946       | Q6BYR7                                   | 4959        | A1CPF3                                    | 5057        |
| A2YFA8                     | 39946       | A3M0I8                                   | 4924        | A1D2B1                                    | 331117      |
| A2YIT3                     | 39946       | B9WKY8                                   | 573826      | A2QRH6                                    | 425011      |
| A2YR01                     | 39946       | C4YKZ6                                   | 5476        | A2XUC4                                    | 39946       |
| A3ANM5                     | 39947       | Q5A9L8                                   | 5476        | A4R8N0                                    | 148305      |
| A3ANM6                     | 39947       | Q5A9B9                                   | 5476        | A6QTP2                                    | 339724      |
| A3BDS5                     | 39947       | C4XWR7                                   | 306902      | A6RML4                                    | 332648      |
| A3BH76                     | 39947       | C4QZU0                                   | 644223      | A7F349                                    | 665079      |
| A3GH63                     | 4924        | A5DEH6                                   | 4929        | B0XR95                                    | 451804      |
| A4R8A0                     | 148305      | Q75D13                                   | 33169       | B1X4B6                                    | 39717       |
| A4RVE9                     | 436017      | Q6C5V8                                   | 4952        | B2AXK8                                    | 5145        |
| A4S0C1                     | 436017      | Q2ULK9                                   | 5062        | B2WJ92                                    | 426418      |
| A5AI98                     | 29760       | B8N253                                   | 332952      | B6H5A3                                    | 500485      |
| A5E4I2                     | 36914       | A2QLM4                                   | 425011      | B6QCL2                                    | 441960      |
| A6RAG5                     | 339724      | A1CU99                                   | 5057        | B6T2R9                                    | 4577        |
| A6RUK6                     | 332648      | C1H2L2                                   | 502779      | B6TJE4                                    | 4577        |
| A6ZUW8                     | 307796      | C5JD45                                   | 559298      | B7FJB9                                    | 3880        |
| A7ES09                     | 665079      | C5GVJ5                                   | 559297      | B8AQP1                                    | 39946       |
| A7TKX5                     | 436907      | B8M905                                   | 441959      | B8M271                                    | 441959      |
| A7UX21                     | 5141        | B8MAL9                                   | 441959      | B8M8Z8                                    | 441959      |
| A8IFZ9                     | 3055        | C1GB53                                   | 502780      | B8M8Z9                                    | 441959      |

|        |        |        |        |        |        |
|--------|--------|--------|--------|--------|--------|
| A8J599 | 3055   | C0S905 | 482561 | B8N4X9 | 332952 |
| A8NEP3 | 240176 | A1DNY2 | 331117 | B9FFK4 | 39947  |
| A8PRB2 | 425265 | Q4WLR6 | 5085   | B9TB57 | 3988   |
| A9NUV8 | 3332   | B0Y8U4 | 451804 | C0NNJ0 | 447093 |
| A9PGZ5 | 3694   | C4JSG9 | 336963 | C0PIP8 | 4577   |
| A9PJJ9 | 3695   | Q0CSS2 | 341663 | C0S7N5 | 482561 |
| A9RDX2 | 145481 | B6QDK2 | 441960 | C1ECT8 | 296587 |
| A9RJ02 | 145481 | A6R6G6 | 339724 | C1GJ38 | 502780 |
| A9RJP2 | 145481 | D4DH22 | 663202 | C1HD27 | 502779 |
| A9RTF1 | 145481 | A4R7P3 | 148305 | C1N9X4 | 564608 |
| A9S4R5 | 145481 | C5PFW8 | 222929 | C4JBA3 | 4577   |
| A9V2F2 | 81824  | C5FL75 | 554155 | C4JLE2 | 336963 |
| B0CS16 | 486041 | C9SKS1 | 526221 | C4R637 | 644223 |
| B0XM82 | 451804 | C8V7L2 | 227321 | C5DC85 | 559295 |
| B0XTB9 | 451804 | C0NHA0 | 447093 | C5DZ89 | 559307 |
| B0ZSJ6 | 3847   | A7E6R5 | 665079 | C5FHC2 | 554155 |
| B2ACV4 | 5145   | D5GN36 | 39416  | C5GII0 | 559297 |
| B2W653 | 426418 | Q5B6Y5 | 162425 | C5JGB7 | 559298 |
| B2Y0K4 | 4577   | B6HT18 | 500485 | C5P5A9 | 222929 |
| B3LIN9 | 285006 | O94582 | 4896   | C6HFS8 | 544712 |
| B4F800 | 4577   | C6H6M2 | 544712 | C7YYQ5 | 660122 |
| B4FGW7 | 4577   | B6K2N8 | 402676 | C9SP56 | 526221 |
| B4FIR7 | 4577   | Q0UL85 | 13684  | D4ARE5 | 663331 |
| B4FTB8 | 4577   | Q4PHV9 | 5270   | D4DA85 | 663202 |
| B6HLH5 | 500485 | A8NHG9 | 240176 | D5GHJ8 | 39416  |
| B6HT75 | 500485 | B0D3J2 | 486041 | D7KAK0 | 81972  |
| B6K8C9 | 402676 | A5DS63 | 36914  | D7LCU7 | 81972  |
| B6QC07 | 441960 | D4ATA7 | 663331 | D7LP35 | 81972  |
| B6SCC6 | 103766 | B2ADS2 | 5145   | D7LQ09 | 81972  |
| B6SCC7 | 103766 | Q55R50 | 5207   | P00908 | 5141   |
| B6SCC8 | 565971 | Q5KF19 | 5207   | P05328 | 5061   |
| B6SCC9 | 565971 | Q872P4 | 5141   | P06531 | 162425 |
| B6SCD0 | 565971 | C7Z803 | 660122 | P18483 | 105351 |
| B6SCD2 | 53161  | A8PQY2 | 425265 | P20409 | 4837   |
| B6TI69 | 4577   | D1ZJV6 | 5147   | P24773 | 5076   |
| B6TS31 | 4577   | D0MTW7 | 403677 | P48261 | 2762   |
| B6U662 | 4577   | B2W891 | 426418 | P51362 | 2787   |
| B7FQI2 | 556484 | Q2GU28 | 38033  | Q00ZS5 | 70448  |
| B8ALB1 | 39946  | A6S6K0 | 332648 | Q0D0N0 | 341663 |
| B8CEN4 | 35128  | A9SGW3 | 145481 | Q0UCF0 | 13684  |
| B8LQ55 | 3332   | A9T285 | 145481 | Q1XDC5 | 2788   |
| B8M3L9 | 441959 | A9T2B2 | 145481 | Q25A90 | 4530   |
| B8MZR1 | 332952 | B9SI04 | 3988   | Q2H6W2 | 38033  |
| B8N9Y5 | 332952 | B9SLL9 | 3988   | Q2UCI0 | 5062   |
| B8NGL5 | 332952 | C5WU43 | 4558   | Q4PBY7 | 5270   |
| B8NW60 | 332952 | P32068 | 3702   | Q5KC22 | 5207   |



|        |        |        |        |        |        |
|--------|--------|--------|--------|--------|--------|
| B9GS77 | 3694   | P32069 | 3702   | Q6B925 | 285951 |
| B9H8G5 | 3694   | Q10B97 | 39947  | Q6MYH9 | 5085   |
| B9HZK8 | 3694   | Q45KJ2 | 4577   | Q873X5 | 5530   |
| B9I0B9 | 3694   | Q9XJ29 | 39947  | Q8L9I8 | 3702   |
| B9I7M4 | 3694   | A2XNK3 | 39946  | Q92370 | 4896   |
| B9PET1 | 3694   | A5BV77 | 29760  | Q92411 | 5016   |
| B9PFJ8 | 3694   | A6S6J9 | 332648 |        |        |
| B9RXQ0 | 3988   | B1X521 | 39717  |        |        |
| B9S4R8 | 3988   | B4F8P4 | 4577   |        |        |
| B9SAI8 | 3988   | B8AKD7 | 39946  |        |        |
| B9WQG5 | 573826 | B9F770 | 39947  |        |        |
| C0HGY6 | 4577   | C1E0B2 | 296587 |        |        |
| C0NSJ2 | 447093 | C1MRE5 | 564608 |        |        |
| C0P7Z2 | 4577   | C4JBB1 | 4577   |        |        |
| C0SC97 | 482561 | D7LLC3 | 81972  |        |        |
| C1DY75 | 296587 | D7LV96 | 81972  |        |        |
| C1DZ74 | 296587 | D7LZ03 | 81972  |        |        |
| C1FGK1 | 296587 | O81533 | 4097   |        |        |
| C1GI69 | 502780 | Q015Q7 | 70448  |        |        |
| C1H5U4 | 502779 | Q0KIX3 | 4498   |        |        |
| C1MQU0 | 564608 | Q0KIX4 | 4498   |        |        |
| C4J9I9 | 4577   | Q0KIX5 | 4498   |        |        |
| C4JV91 | 336963 | Q10NN4 | 39947  |        |        |
| C4R1F2 | 644223 | Q10NN5 | 39947  |        |        |
| C4R547 | 644223 | Q10NN7 | 39947  |        |        |
| C4XZK1 | 306902 | Q10NN8 | 39947  |        |        |
| C5DHV1 | 559295 | Q41155 | 37565  |        |        |
| C5E048 | 559307 | Q41156 | 37565  |        |        |
| C5FPG0 | 554155 | Q5XLF2 | 16922  |        |        |
| C5GT68 | 559297 | Q5XLF3 | 16922  |        |        |
| C5JLJ6 | 559298 | Q84QB7 | 39947  |        |        |
| C5MCT3 | 294747 | Q944Q5 | 3702   |        |        |
| C5P0D6 | 222929 | Q94GF1 | 4530   |        |        |
| C5WX66 | 4558   | Q9AW95 | 4058   |        |        |
| C5WX67 | 4558   | Q9LY58 | 3702   |        |        |
| C5WX69 | 4558   | Q9XJ30 | 39947  |        |        |
| C5XB29 | 4558   |        |        |        |        |
| C5Z690 | 4558   |        |        |        |        |
| C6HDU0 | 544712 |        |        |        |        |
| C6T703 | 3847   |        |        |        |        |
| C6TF21 | 3847   |        |        |        |        |
| C6THT5 | 3847   |        |        |        |        |
| C6TKV4 | 3847   |        |        |        |        |
| C7GS99 | 574961 |        |        |        |        |
| C7Z1A2 | 660122 |        |        |        |        |
| C8V1R2 | 227321 |        |        |        |        |

|        |        |
|--------|--------|
| C8VGH6 | 227321 |
| C8Z8L6 | 643680 |
| C9SFC8 | 526221 |
| D0AB52 | 39946  |
| D0AB53 | 39946  |
| D0N5Q5 | 403677 |
| D1ZU10 | 5147   |
| D3AW64 | 670386 |
| D4AMB4 | 663331 |
| D4D9I8 | 663202 |
| D5ABD1 | 3332   |
| D5G583 | 39416  |
| D5GHY3 | 39416  |
| D6RKG0 | 240176 |
| D6VUB2 | 559292 |
| D7KMG3 | 81972  |
| D7LUW2 | 81972  |
| D7M3G0 | 81972  |
| D7MEJ4 | 81972  |
| D7MJX6 | 81972  |
| D7MUW5 | 81972  |
| O04225 | 4530   |
| O13831 | 4896   |
| O22765 | 3702   |
| O50046 | 16922  |
| P00931 | 4932   |
| P13228 | 5141   |
| P14671 | 3702   |
| P16578 | 5346   |
| P25269 | 3702   |
| P42390 | 4577   |
| P43283 | 4577   |
| P43284 | 4577   |
| Q014Y8 | 70448  |
| Q01BL5 | 70448  |
| Q0CF14 | 341663 |
| Q0CIQ9 | 341663 |
| Q0CYD3 | 341663 |
| Q0ULK5 | 13684  |
| Q0WS13 | 3702   |
| Q0WUI8 | 3702   |
| Q0WWE0 | 3702   |
| Q2GMW7 | 38033  |
| Q2TX96 | 5062   |
| Q2UFA5 | 5062   |
| Q2UGE4 | 5062   |

|        |        |
|--------|--------|
| Q2UQB8 | 5062   |
| Q42529 | 3702   |
| Q4P5M9 | 5270   |
| Q4WLH4 | 5085   |
| Q4X0J6 | 5085   |
| Q55Z78 | 5207   |
| Q56YC7 | 3702   |
| Q58A35 | 4565   |
| Q58A36 | 4565   |
| Q59KP3 | 5476   |
| Q5AZP9 | 162425 |
| Q5B1Y6 | 162425 |
| Q5CDU1 | 237895 |
| Q5KNJ3 | 5207   |
| Q5KT13 | 96455  |
| Q659I8 | 161756 |
| Q67VM1 | 39947  |
| Q67VM2 | 39947  |
| Q6BS14 | 4959   |
| Q6C0G7 | 4952   |
| Q6CNQ8 | 28985  |
| Q6FXZ3 | 5478   |
| Q6YYB9 | 39947  |
| Q6ZL61 | 39947  |
| Q752T8 | 33169  |
| Q7XAK6 | 4565   |
| Q7Y1H9 | 39947  |
| Q7Y1I6 | 39947  |
| Q7Y1I9 | 39947  |
| Q7Y1J1 | 39947  |
| Q874B5 | 96454  |
| Q8GWQ8 | 3702   |
| Q8LA83 | 3702   |
| Q8W0T4 | 4558   |
| Q9FFW8 | 3702   |
| Q9FQ75 | 4577   |
| Q9FQ77 | 4577   |
| Q9P4D5 | 162425 |

**pyruvate  
dehydrogenase**

| <b>UniProt</b> | <b>TXID</b> |
|----------------|-------------|
| A0BMJ5         | 5888        |
| A0BWV5         | 5888        |
| A0BYJ3         | 5888        |
| A0C608         | 5888        |
| A0C609         | 5888        |

**GDH2**

| <b>UniProt</b> | <b>TXID</b> |
|----------------|-------------|
| P33327         | 4932        |
| D6VRD9         | 559292      |
| B3LH95         | 285006      |
| A6ZXB8         | 307796      |
| C8Z6Q4         | 643680      |

**GLUD1**

| <b>UniProt</b> | <b>TXID</b> |
|----------------|-------------|
| A0AG12         | 386043      |
| A0AQX1         | 1599        |
| A0BLL2         | 5888        |
| A0BRD6         | 5888        |
| A0D0R3         | 5888        |

|        |        |        |        |        |        |
|--------|--------|--------|--------|--------|--------|
| A0CAD2 | 5888   | C7GSW2 | 574961 | A0DCF5 | 5888   |
| A0CTC0 | 5888   | Q6FT35 | 5478   | A0K0R0 | 290399 |
| A0DIQ3 | 5888   | C5DTM8 | 559307 | A0K4J4 | 331272 |
| A0DRP7 | 5888   | A7TL77 | 436907 | A0LNB5 | 335543 |
| A1CC50 | 5057   | C5DD00 | 559295 | A0LND6 | 335543 |
| A1CEI6 | 5057   | Q750J1 | 33169  | A0LZA8 | 411154 |
| A1CQW6 | 5057   | Q6CRJ9 | 28985  | A0M5G0 | 411154 |
| A1D3S9 | 331117 | A5DKC9 | 4929   | A0M685 | 411154 |
| A1DFQ7 | 331117 | C4YB08 | 306902 | A0Q1V4 | 386415 |
| A1DKN9 | 331117 | C4YK87 | 5476   | A0Q832 | 401614 |
| A2CI50 | 3144   | Q5A2L3 | 5476   | A0R3E3 | 246196 |
| A2Q7C0 | 425011 | Q5A2S3 | 5476   | A0RBU7 | 412694 |
| A2QPI1 | 425011 | A3LVW5 | 4924   | A0RR57 | 360106 |
| A2QWB4 | 425011 | B8YJM3 | 4924   | A0RU01 | 46770  |
| A2XPT6 | 39946  | Q6BUJ8 | 4959   | A0YQX1 | 313612 |
| A2YB83 | 39946  | C5M741 | 294747 | A0YYR7 | 313612 |
| A2YXH5 | 39946  | B9WC72 | 573826 | A0ZB83 | 313624 |
| A2Z2Z0 | 39946  | A5DX46 | 36914  | A0ZZA6 | 367928 |
| A3CJH1 | 39947  | C4R0A2 | 644223 | A1ABU2 | 405955 |
| A3GEX9 | 4924   | D1ZFZ8 | 5147   | A1APQ5 | 338966 |
| A3LYM2 | 4924   | P00365 | 5141   | A1AUR9 | 338966 |
| A4H9P1 | 5660   | B2WN29 | 426418 | A1B8U4 | 318586 |
| A4HEH1 | 5660   | Q0UEU1 | 13684  | A1BCV7 | 290317 |
| A4HY08 | 5671   | B6Q390 | 441960 | A1HLZ4 | 401526 |
| A4IIL9 | 5671   | B6Q389 | 441960 | A1HSF6 | 401526 |
| A4R8U2 | 148305 | B2AW77 | 5145   | A1KVB4 | 272831 |
| A4RNF5 | 148305 | B8LT73 | 441959 | A1R9V9 | 290340 |
| A4RRY3 | 436017 | D5GF65 | 39416  | A1RT74 | 384616 |
| A4RYZ2 | 436017 | C5PHJ9 | 222929 | A1RVI3 | 384616 |
| A5A6L0 | 9598   | A4QSW7 | 148305 | A1RYG4 | 368408 |
| A5ACP6 | 29760  | Q9C2U8 | 5127   | A1SH86 | 196162 |
| A5B2Z7 | 29760  | B0XVW9 | 451804 | A1TEH7 | 350058 |
| A5DKG2 | 4929   | Q4WHB4 | 5085   | A1TIL2 | 397945 |
| A5DM34 | 4929   | A1DG18 | 331117 | A1TXD9 | 351348 |
| A5E4A4 | 36914  | B6HS95 | 500485 | A1V0F0 | 320388 |
| A5E7Q7 | 36914  | A1C5Y4 | 5057   | A1VGK8 | 391774 |
| A5JTL8 | 7091   | Q6XNK7 | 162425 | A1VM77 | 365044 |
| A5K3U7 | 5855   | Q5AW79 | 162425 | A1W2B5 | 232721 |
| A5K4Q5 | 5855   | C8VBC6 | 227321 | A1W4P2 | 232721 |
| A5YVE9 | 9606   | Q0CHP4 | 341663 | A1WIK0 | 391735 |
| A6QVF3 | 339724 | Q2UMK8 | 5062   | A1WT43 | 349124 |
| A6RDB1 | 339724 | Q6C6H1 | 4952   | A1ZDU1 | 313606 |
| A6RQX9 | 332648 | C5GF51 | 559297 | A1ZG68 | 313606 |
| A6S8P7 | 332648 | C1GR57 | 502779 | A1ZR86 | 313606 |
| A6ZLG0 | 307796 | C1G989 | 502780 | A2BL51 | 415426 |
| A6ZRD5 | 307796 | C4JF29 | 336963 | A2CA49 | 59922  |

|        |        |        |        |        |        |
|--------|--------|--------|--------|--------|--------|
| A7EWB7 | 665079 | A2QFH7 | 425011 | A2D8B4 | 5722   |
| A7F173 | 665079 | D4DHP3 | 663202 | A2DWI3 | 5722   |
| A7MB35 | 9913   | D4AL96 | 663331 | A2G1Y8 | 5722   |
| A7S6S9 | 45351  | C0S0Y3 | 482561 | A2S5H7 | 412022 |
| A7SRY1 | 45351  | C5FNT6 | 554155 | A2SMA9 | 420662 |
| A7TJM1 | 436907 | C5JT14 | 559298 | A2SRC2 | 410358 |
| A7TM51 | 436907 | A6R1Z2 | 339724 | A2TQI4 | 313590 |
| A7UUV1 | 7165   | C0NCJ6 | 447093 | A2TSV1 | 313590 |
| A8IWK9 | 3055   | Q4P1M9 | 5270   | A2TYE4 | 313598 |
| A8IXJ9 | 3711   | B0CUZ3 | 486041 | A2U018 | 313598 |
| A8JBC6 | 3055   | B0DSY6 | 486041 | A2VSW9 | 350702 |
| A8JBC7 | 3055   | Q9Y8G5 | 5341   | A2WCN3 | 350701 |
| A8JCF6 | 3055   | B8NPE3 | 332952 | A2X7V1 | 39946  |
| A8NXQ0 | 240176 | A8NSP9 | 240176 | A2XMV1 | 39946  |
| A8P325 | 240176 | Q5KJ92 | 5207   | A2XW22 | 39946  |
| A8P370 | 6279   | Q9USN5 | 4896   | A3ANK4 | 39947  |
| A8P5C2 | 6279   | A8PWR2 | 425265 | A3CKW9 | 388919 |
| A8PHS0 | 6279   | D3BT84 | 670386 | A3DCD3 | 203119 |
| A8PHS1 | 6279   | Q54VI3 | 44689  | A3DLU5 | 399550 |
| A8PIV1 | 6279   | Q2H9P5 | 38033  | A3HU52 | 388413 |
| A8Q0F0 | 425265 | A6SRU5 | 332648 | A3HW69 | 388413 |
| A8Q2M5 | 425265 | D0NHJ6 | 403677 | A3IB39 | 388400 |
| A8XZA8 | 6238   | A9URB8 | 81824  | A3IFY6 | 388400 |
| A9NWC1 | 3332   | B9PR57 | 5811   | A3IL52 | 391612 |
| A9NWX6 | 3332   | B9QD05 | 432359 | A3J255 | 391598 |
| A9NWM3 | 3332   | B6KHF0 | 508771 | A3J2Y4 | 391598 |
| A9NWY7 | 3332   | C5LBR2 | 423536 | A3J3F7 | 391598 |
| A9P841 | 3694   | C5L8Y0 | 423536 | A3JK00 | 270374 |
| A9P9K0 | 3694   | C5L543 | 423536 | A3JWL9 | 388401 |
| A9PF50 | 3694   | A7APP0 | 5865   | A3K3C4 | 388399 |
| A9S485 | 145481 | A7E3Y0 | 665079 | A3M3G4 | 400667 |
| A9S8R2 | 145481 | Q38EX6 | 5691   | A3M9D7 | 400667 |
| A9SPL8 | 145481 | O99877 | 5691   | A3MPG2 | 320389 |
| A9SXT8 | 145481 | C9ZXU0 | 679716 | A3MUY9 | 410359 |
| A9T5Q6 | 145481 | Q25415 | 5689   | A3MWK6 | 410359 |
| A9TBP7 | 145481 | Q4QF83 | 5664   | A3MZE5 | 416269 |
| A9TC13 | 145481 | A4H874 | 5660   | A3NDI7 | 320373 |
| A9TTX3 | 145481 | Q4N166 | 5875   | A3NZ98 | 357348 |
| A9TY50 | 145481 | Q4U8H1 | 5874   | A3PLD8 | 349101 |
| A9V0I3 | 81824  | A4HWJ9 | 5671   | A3RRM9 | 342110 |
| A9VB15 | 81824  | C8WZJ8 | 485915 | A3S765 | 52598  |
| B0CYG4 | 486041 | B8DRK8 | 883    | A3SMT7 | 89187  |
| B0DCT7 | 486041 | B7FWY4 | 556484 | A3T1P0 | 314267 |
| B0W2T1 | 7176   | B8BVC6 | 35128  | A3U211 | 252305 |
| B0WB92 | 7176   | Q72DG5 | 882    | A3U5S5 | 216432 |
| B0X5L5 | 7176   | C5U0R2 | 573059 | A3U848 | 216432 |

|        |        |        |        |        |        |
|--------|--------|--------|--------|--------|--------|
| B0XA87 | 7176   | Q312G5 | 207559 | A3V3Q4 | 314232 |
| B0XPR8 | 451804 | D1U2S7 | 643562 | A3VPB7 | 314260 |
| B0XVD8 | 451804 | C4MA71 | 5759   | A3W2R2 | 314264 |
| B0XZB4 | 451804 | A1VF24 | 391774 | A3X055 | 314253 |
| B1X3R0 | 39717  | D0LMG4 | 502025 | A3X6R2 | 314262 |
| B1X423 | 39717  | B3KZC7 | 5851   | A3X960 | 314262 |
| B2ATG7 | 5145   | D2L065 | 644968 | A3XI35 | 398720 |
| B2AXC0 | 5145   | D6YSD5 | 716544 | A3XQE9 | 398720 |
| B2R5P7 | 9606   | B0ENR3 | 370354 | A3ZUB7 | 314230 |
| B2WEK4 | 426418 | Q7RIC4 | 73239  | A4A3G4 | 314285 |
| B2WLB2 | 426418 | Q4YNP5 | 5821   | A4AE18 | 314285 |
| B3L549 | 5851   | Q6MB29 | 264201 | A4APW2 | 313603 |
| B3L9V4 | 5851   | A5KCJ5 | 5855   | A4ATX0 | 313603 |
| B3LMU1 | 285006 | D1R8E4 | 159254 | A4BV92 | 314278 |
| B3LRT8 | 285006 | C0QAW6 | 177437 | A4BYJ2 | 313594 |
| B3MM14 | 7217   | C0QBC7 | 177437 | A4CJJ4 | 313596 |
| B3MT41 | 7217   | C0QD21 | 177437 | A4CMC0 | 313596 |
| B3MZ63 | 7217   | C0QGJ6 | 177437 | A4ENJ3 | 391593 |
| B3MZ64 | 7217   | A5GDM2 | 351605 | A4EU82 | 388739 |
| B3NU60 | 7220   | A5GB85 | 351605 | A4FGG9 | 405948 |
| B3NU61 | 7220   | C6MU48 | 443143 | A4FGH8 | 405948 |
| B3P5L5 | 7220   | C6MRG2 | 443143 | A4FM84 | 405948 |
| B3RI95 | 10228  | Q74CV7 | 35554  | A4GJ67 | 415439 |
| B3RY46 | 10228  | D7AIZ4 | 663917 | A4HGZ4 | 5660   |
| B4DDD7 | 9606   | B5EHY2 | 404380 | A4I426 | 5671   |
| B4E2N3 | 9606   | C6E4K3 | 443144 | A4IQB6 | 420246 |
| B4F8B8 | 4577   | B3E403 | 398767 | A4IT39 | 420246 |
| B4FGJ4 | 4577   | B9M6R2 | 316067 | A4IXJ1 | 418136 |
| B4FML9 | 4577   | Q39UW5 | 269799 | A4JBj3 | 269482 |
| B4G2H5 | 7234   | Q11CT2 | 266779 | A4KPQ5 | 412422 |
| B4G974 | 7234   | A0B191 | 331272 | A4MF39 | 425067 |
| B4GV47 | 7234   | A0KKL0 | 380703 | A4MXA4 | 374927 |
| B4GV48 | 7234   | A0KW49 | 94122  | A4N597 | 375432 |
| B4HZ58 | 7238   | A0L7M2 | 156889 | A4NC90 | 375177 |
| B4I0V9 | 7238   | A0LVR1 | 351607 | A4NHF6 | 374928 |
| B4I0W0 | 7238   | A0QDD7 | 243243 | A4NM81 | 374932 |
| B4J5T9 | 7222   | A0R1C2 | 246196 | A4NTY9 | 374933 |
| B4JLC4 | 7222   | A0RBU7 | 412694 | A4NYZ3 | 375063 |
| B4JRR3 | 7222   | A1KLH2 | 410289 | A4QFE5 | 340322 |
| B4K754 | 7230   | A1KUS5 | 272831 | A4QHY0 | 340322 |
| B4KK39 | 7230   | A1RJ05 | 351745 | A4T6P7 | 350054 |
| B4L471 | 7230   | A1S5Z3 | 326297 | A4VI30 | 379731 |
| B4L472 | 7230   | A1SG04 | 196162 | A4W9I4 | 399742 |
| B4LTB1 | 7244   | A1ST78 | 357804 | A4WM05 | 340102 |
| B4M0B1 | 7244   | A1U206 | 351348 | A4WMJ4 | 340102 |
| B4M3I9 | 7244   | A1UJ73 | 189918 | A4WQS9 | 349102 |

|        |        |        |        |        |        |
|--------|--------|--------|--------|--------|--------|
| B4M3J0 | 7244   | A1VP09 | 365044 | A4YIG2 | 399549 |
| B4MWW8 | 7260   | A3MUY9 | 410359 | A4YQZ0 | 114615 |
| B4NBF7 | 7260   | A3Q2L9 | 164757 | A5BSM5 | 29760  |
| B4NEE4 | 7260   | A3QDX7 | 323850 | A5EFM4 | 288000 |
| B4NEE5 | 7260   | A4F9C3 | 405948 | A5FBS3 | 376686 |
| B4PQ74 | 7245   | A4FH38 | 405948 | A5FMS4 | 376686 |
| B4Q027 | 7245   | A4IQB6 | 420246 | A5G5A5 | 351605 |
| B4Q028 | 7245   | A4JPF2 | 269482 | A5G5J9 | 351605 |
| B4QZG5 | 7240   | A4SME1 | 382245 | A5I2T3 | 441771 |
| B4R4P7 | 7240   | A4T7V6 | 350054 | A5IFK8 | 400673 |
| B4R4P8 | 7240   | A4VM44 | 379731 | A5ING2 | 390874 |
| B5DIC8 | 46245  | A4XAT7 | 369723 | A5IRD6 | 359786 |
| B5G1H2 | 59729  | A4XWG7 | 399739 | A5J911 | 334802 |
| B5LAW2 | 4072   | A4Y7I3 | 319224 | A5K0U3 | 5855   |
| B5LAW3 | 4072   | A5FYF5 | 349163 | A5K164 | 5855   |
| B5VEH3 | 545124 | A5I2T3 | 441771 | A5KL31 | 411460 |
| B5VHW0 | 545124 | A5IC79 | 400673 | A5LDP8 | 406556 |
| B5X4R5 | 8030   | A5IRD6 | 359786 | A5LN10 | 406557 |
| B6GZG1 | 500485 | A5U5H2 | 419947 | A5LVW0 | 406558 |
| B6H5P2 | 500485 | A5VF76 | 392499 | A5M484 | 406559 |
| B6HQM6 | 500485 | A5VSF9 | 444178 | A5M7R4 | 406560 |
| B6JZG7 | 402676 | A5W6M4 | 351746 | A5MGJ7 | 406561 |
| B6K381 | 402676 | A5WEF7 | 349106 | A5MRJ7 | 406562 |
| B6KDD9 | 508771 | A5WQ88 | 336982 | A5MSW6 | 406563 |
| B6QAQ6 | 441960 | A6QFG8 | 426430 | A5N1R2 | 431943 |
| B6QI45 | 441960 | A6TLH2 | 293826 | A5P6Y6 | 161528 |
| B6QTP8 | 441960 | A6U065 | 359787 | A5UAW4 | 374930 |
| B6T565 | 4577   | A6UED1 | 366394 | A5ULL5 | 420247 |
| B6T6H3 | 4577   | A6V310 | 381754 | A5UU09 | 357808 |
| B6TC14 | 4577   | A6VUB2 | 400668 | A5V1G5 | 357808 |
| B6TD83 | 4577   | A6WEM1 | 266940 | A5V3C0 | 392499 |
| B6TD94 | 4577   | A6WP31 | 402882 | A5VGL3 | 392499 |
| B6TKX6 | 4577   | A6WXV0 | 439375 | A5VNF6 | 444178 |
| B6TMS5 | 4577   | A7FUM1 | 441770 | A5XV02 | 334803 |
| B6TP75 | 4577   | A7GE56 | 441772 | A5Z9F7 | 411463 |
| B6TQ36 | 4577   | A7GN28 | 315749 | A5ZR80 | 411459 |
| B6UI91 | 4577   | A7IF87 | 78245  | A6BKL3 | 411462 |
| B7E707 | 39947  | A7N0L5 | 338187 | A6C0C8 | 344747 |
| B7EWY7 | 39947  | A7X0H1 | 418127 | A6CBA5 | 344747 |
| B7FJJ4 | 3880   | A7Z646 | 326423 | A6CG24 | 344747 |
| B7FZN6 | 556484 | A7ZA02 | 326423 | A6CK18 | 161544 |
| B7GAB0 | 556484 | A8EZV8 | 293613 | A6CP62 | 161544 |
| B7PR86 | 6945   | A8F2P6 | 416276 | A6CR94 | 161544 |
| B7PZE3 | 6945   | A8FEN2 | 315750 | A6DKS2 | 313628 |
| B7Z3T7 | 9606   | A8FW62 | 425104 | A6DTG1 | 313628 |
| B7Z3X5 | 9606   | A8GPN7 | 293614 | A6DYL7 | 391613 |

|        |        |        |        |        |        |
|--------|--------|--------|--------|--------|--------|
| B7ZWU6 | 4577   | A8GTM0 | 392021 | A6E717 | 391596 |
| B8ANM1 | 39946  | A8GUP5 | 391896 | A6EMP5 | 50743  |
| B8B945 | 39946  | A8H3X7 | 398579 | A6EN51 | 50743  |
| B8BN11 | 39946  | A8HYW7 | 438753 | A6FQ52 | 351016 |
| B8BVN4 | 35128  | A8M2G7 | 391037 | A6H0W7 | 402612 |
| B8LC08 | 296543 | A8MJK9 | 350688 | A6LIH9 | 435591 |
| B8LPU2 | 3332   | A8Z064 | 451516 | A6LJS6 | 391009 |
| B8LRC3 | 3332   | A9AQQ3 | 395019 | A6LKL9 | 391009 |
| B8M064 | 441959 | A9CHD5 | 176299 | A6NVM8 | 411467 |
| B8MLB2 | 441959 | A9IZE8 | 382640 | A6QBL6 | 387093 |
| B8MNW2 | 441959 | A9KFS5 | 434922 | A6QFG8 | 426430 |
| B8N4B6 | 332952 | A9L4D1 | 399599 | A6SUM1 | 375286 |
| B8N7H4 | 332952 | A9M0J4 | 374833 | A6SXZ7 | 375286 |
| B8NL85 | 332952 | A9M857 | 483179 | A6T7S2 | 272620 |
| B9FSH9 | 39947  | A9NDT8 | 360115 | A6T8K3 | 272620 |
| B9GMQ4 | 3694   | A9VLQ8 | 315730 | A6TLH2 | 293826 |
| B9GRR1 | 3694   | A9WMN1 | 288705 | A6U065 | 359787 |
| B9HLV5 | 3694   | A9WWU4 | 470137 | A6VLA6 | 339671 |
| B9HU92 | 3694   | B0BV56 | 452659 | A6WVM7 | 439375 |
| B9IJS2 | 3694   | B0K183 | 399726 | A6X7S8 | 439375 |
| B9PIC5 | 5811   | B0K9J6 | 340099 | A7A2X9 | 411481 |
| B9Q6G0 | 432359 | B0KG75 | 76869  | A7AJB2 | 411477 |
| B9RFW4 | 3988   | B0RRS4 | 509169 | A7AS73 | 5865   |
| B9RNK3 | 3988   | B0S1R7 | 334413 | A7AYC2 | 411470 |
| B9S0Z5 | 3988   | B0T423 | 366602 | A7B911 | 411466 |
| B9S2H9 | 3988   | B0TIY1 | 458817 | A7FUM1 | 441770 |
| B9TI82 | 3988   | B0U746 | 405440 | A7GE56 | 441772 |
| B9WF66 | 573826 | B0UCK2 | 426117 | A7GN28 | 315749 |
| B9WG75 | 573826 | B1HXF2 | 444177 | A7GWG7 | 360105 |
| C0HAN7 | 8030   | B1IM79 | 498213 | A7HC09 | 404589 |
| C0L943 | 65672  | B1J592 | 390235 | A7HEQ1 | 404589 |
| C0NY78 | 447093 | B1K2B6 | 406425 | A7HLX9 | 381764 |
| C0NZ02 | 447093 | B1KDM7 | 392500 | A7HS59 | 402881 |
| C0P3K5 | 4577   | B1KSB4 | 498214 | A7I0A6 | 360107 |
| C0S739 | 482561 | B1M669 | 426355 | A7JB60 | 430557 |
| C0S8J0 | 482561 | B1MMT4 | 561007 | A7JJE2 | 430558 |
| C0Z306 | 3702   | B1VUY9 | 455632 | A7JNJ5 | 442346 |
| C1BKT8 | 8014   | B1Y879 | 395495 | A7JY81 | 150340 |
| C1BUV4 | 72036  | B1YI38 | 262543 | A7N9W0 | 458234 |
| C1BUZ3 | 72036  | B1YXD5 | 398577 | A7NH98 | 383372 |
| C1BXA8 | 8010   | B2A3W6 | 457570 | A7NKS4 | 383372 |
| C1C0S3 | 344056 | B2FLA4 | 522373 | A7S6F3 | 45351  |
| C1C2R8 | 344056 | B2GGY9 | 378753 | A7SE06 | 45351  |
| C1EJE1 | 296587 | B2HNI6 | 216594 | A7VHP8 | 411489 |
| C1FHD4 | 296587 | B2IAI7 | 405441 | A7VIA6 | 411489 |
| C1G056 | 502780 | B2JR70 | 391038 | A7VQT4 | 428125 |



|        |        |        |        |        |        |
|--------|--------|--------|--------|--------|--------|
| C1G547 | 502780 | B2S7P3 | 430066 | A7X0H1 | 418127 |
| C1GSN9 | 502779 | B2SW49 | 360094 | A7YRY8 | 430556 |
| C1HC04 | 502779 | B2TGT9 | 398527 | A7YVW3 | 3625   |
| C1MUI7 | 564608 | B2UK21 | 402626 | A7YVW4 | 3625   |
| C1N531 | 564608 | B3CPG6 | 570417 | A7Z646 | 326423 |
| C3ZAR7 | 7739   | B3CVC9 | 334380 | A7ZA02 | 326423 |
| C3ZNR2 | 7739   | B3D838 | 395019 | A7ZB01 | 360104 |
| C4JGN6 | 336963 | B3PIM1 | 498211 | A7ZMNO | 331111 |
| C4JQ30 | 336963 | B3PS34 | 491916 | A8A0V4 | 331112 |
| C4PXN7 | 6183   | B3R4P0 | 164546 | A8AHF5 | 290338 |
| C4QIQ4 | 6183   | B4ELY2 | 216591 | A8BFF8 | 184922 |
| C4QYX8 | 644223 | B4RCX5 | 450851 | A8EIB4 | 360118 |
| C4R290 | 644223 | B4RKS4 | 521006 | A8F3U9 | 416591 |
| C4WXZ1 | 7029   | B4RZ46 | 314275 | A8FEN2 | 315750 |
| C4Y374 | 306902 | B4SPB0 | 391008 | A8FIU2 | 315750 |
| C4Y4H6 | 306902 | B5FE16 | 388396 | A8GEN4 | 399741 |
| C5DN45 | 559295 | B5Y6Y1 | 309798 | A8GKZ5 | 399741 |
| C5DQ72 | 559307 | B5ZV29 | 395492 | A8JGD1 | 3055   |
| C5DSP9 | 559307 | B6IUZ5 | 414684 | A8KUC1 | 331978 |
| C5E2N9 | 559295 | B6IZQ2 | 434923 | A8LCL1 | 298653 |
| C5FGS2 | 554155 | B6J7N6 | 434924 | A8M7B0 | 391037 |
| C5FRR0 | 554155 | B7GHM2 | 491915 | A8MAL7 | 397948 |
| C5GNW4 | 559297 | B7HHP4 | 405532 | A8MJK9 | 350688 |
| C5GYE7 | 559297 | B7HKZ9 | 405534 | A8NRG3 | 6279   |
| C5JVV9 | 559298 | B7IP68 | 405531 | A8RDE0 | 428127 |
| C5K304 | 559298 | B7JGX6 | 405535 | A8RJF0 | 411902 |
| C5MDI0 | 294747 | B7UVX9 | 557722 | A8RQ20 | 411902 |
| C5MI45 | 294747 | B7VNK8 | 575788 | A8RVA7 | 411902 |
| C5P3C0 | 222929 | B8CPG1 | 225849 | A8SQ78 | 411474 |
| C5P3J7 | 222929 | B8E983 | 407976 | A8U8B8 | 333990 |
| C5WR68 | 4558   | B8GXH7 | 565050 | A8UDU7 | 391603 |
| C5X5A2 | 4558   | B8HBK7 | 452863 | A8X0P1 | 6238   |
| C5XZ73 | 4558   | B8ICZ7 | 460265 | A8YF61 | 267872 |
| C5YBS3 | 4558   | B8ZRA5 | 561304 | A8Z064 | 451516 |
| C5YSC6 | 4558   | B9DIU1 | 396513 | A9A0F1 | 96561  |
| C5Z7K8 | 4558   | B9EAN0 | 458233 | A9A2G9 | 436308 |
| C6H5C5 | 544712 | B9IVL3 | 361100 | A9AH92 | 395019 |
| C6T827 | 3847   | B9JEU7 | 311403 | A9AZT9 | 316274 |
| C6T902 | 3847   | B9JV35 | 311402 | A9BGN9 | 403833 |
| C6TDD9 | 3847   | B9KIA8 | 320483 | A9BJ14 | 403833 |
| C6TGZ8 | 3847   | B9L9E1 | 598659 | A9BN74 | 398578 |
| C6TL67 | 3847   | C0R5K1 | 66084  | A9BPJ0 | 398578 |
| C6TMA9 | 3847   | C0RF69 | 546272 | A9DMC0 | 391587 |
| C7GMT2 | 574961 | C0Z4V2 | 358681 | A9EC10 | 391624 |
| C7GS31 | 574961 | C0ZCA2 | 358681 | A9F2A8 | 448385 |
| C7YYZ0 | 660122 | C1A1Q4 | 234621 | A9F5T9 | 383629 |

|        |        |        |        |        |        |
|--------|--------|--------|--------|--------|--------|
| C7ZKY6 | 660122 | C1AEU3 | 561275 | A9GCU4 | 391619 |
| C8VF33 | 227321 | C1AVS4 | 632772 | A9GCX2 | 448385 |
| C8Z7K2 | 643680 | C1D8T1 | 557598 | A9GGT2 | 448385 |
| C9SBS2 | 526221 | C1DDX7 | 322710 | A9HFA8 | 391595 |
| C9SUX1 | 526221 | C1EMY8 | 572264 | A9I0G0 | 340100 |
| C9ZK62 | 679716 | C1FNV0 | 536232 | A9INH5 | 340100 |
| D0A589 | 679716 | C3KD82 | 216595 | A9KKP2 | 357809 |
| D0MZU0 | 403677 | C3KX46 | 515621 | A9LB64 | 412021 |
| D0NYZ7 | 403677 | C3L9G7 | 568206 | A9M1S9 | 374833 |
| D1ZML0 | 5147   | C3LMH5 | 579112 | A9M7R4 | 483179 |
| D2D323 | 3635   | C3MAR3 | 394    | A9MVX6 | 272994 |
| D2VQJ9 | 5762   | C3NQI3 | 593588 | A9N282 | 272994 |
| D3AX60 | 670386 | C3P579 | 592021 | A9NH73 | 441768 |
| D3BCH5 | 670386 | C3PLN7 | 347255 | A9NXM5 | 3332   |
| D3BML8 | 670386 | C4K1F8 | 562019 | A9SZX5 | 145481 |
| D3DM87 | 559292 | C4L6L5 | 360911 | A9V780 | 81824  |
| D3PGB6 | 72036  | C4XRI8 | 573370 | A9VLQ8 | 315730 |
| D3PI89 | 72036  | C5BKZ4 | 377629 | A9WCC4 | 324602 |
| D3PJ65 | 72036  | C5C3D2 | 471853 | A9WEM0 | 324602 |
| D3TMY3 | 37546  | C5D3H7 | 471223 | B0A793 | 445973 |
| D3TPF3 | 37546  | C5D7D8 | 471223 | B0A794 | 445973 |
| D3UEW6 | 643680 | C6AAW5 | 634504 | B0AM54 | 486624 |
| D4A5G8 | 10116  | C6B069 | 395491 | B0BTT0 | 434271 |
| D4AIR7 | 663331 | C6BLR2 | 428406 | B0CFT6 | 329726 |
| D4DFT9 | 663202 | C6CU94 | 324057 | B0CJ82 | 470137 |
| D5G7G7 | 39416  | C6DN06 | 478434 | B0G3F6 | 411461 |
| D5GGK4 | 39416  | C6S7U3 | 662598 | B0JQI9 | 449447 |
| D6VQL7 | 559292 | C6V502 | 434131 | B0K183 | 399726 |
| D6WH06 | 7070   | C6WQ28 | 446462 | B0K9J6 | 340099 |
| D6WHR4 | 7070   | C6XFI2 | 537021 | B0MHT7 | 411490 |
| D6X401 | 7070   | C6XNG9 | 582402 | B0N555 | 445974 |
| D7FIP4 | 2880   | C7LE50 | 568815 | B0NA80 | 411468 |
| D7KEQ8 | 81972  | C7M2J7 | 525909 | B0NCN8 | 411468 |
| D7KMA1 | 81972  | C7MZW4 | 471857 | B0P2A6 | 411484 |
| D7KPH3 | 81972  | C7NDS3 | 523794 | B0PDC5 | 445972 |
| D7KQB5 | 81972  | C7NFI5 | 478801 | B0Q2D0 | 486619 |
| D7KXE8 | 81972  | C7QFE1 | 479433 | B0R2S8 | 478009 |
| D7KXX5 | 81972  | C7R6H0 | 523791 | B0R3T5 | 478009 |
| D7L1E7 | 81972  | C7RFH9 | 525919 | B0R537 | 478009 |
| D7LH23 | 81972  | C7RQT3 | 522306 | B0TX73 | 484022 |
| D7MQB7 | 81972  | C8WW69 | 521098 | B0UW88 | 228400 |
| O13366 | 28985  | C8XGM6 | 479431 | B0V7W9 | 509173 |
| O13392 | 4924   | C9RV07 | 544556 | B0V9Q6 | 509173 |
| O16144 | 6253   | C9S041 | 544556 | B0VJV7 | 456827 |
| O24457 | 3702   | C9XIV3 | 645462 | B0VQ84 | 509170 |
| O24458 | 3702   | C9YHY9 | 645463 | B0VSA6 | 509170 |

|        |        |        |        |        |        |
|--------|--------|--------|--------|--------|--------|
| O44451 | 6239   | C9YZL4 | 680198 | BOWNE2 | 7176   |
| O64688 | 3702   | D0B9Y5 | 224914 | BOX5C8 | 7176   |
| O82450 | 3702   | D0K3M6 | 681288 | B1B9U1 | 445337 |
| O96865 | 5693   | D0LAG6 | 526226 | B1C1G6 | 428126 |
| P08559 | 9606   | D0M259 | 150340 | B1C5T8 | 445971 |
| P11177 | 9606   | D1AEZ6 | 471852 | B1ENR6 | 502347 |
| P11966 | 9913   | D1ASA8 | 574556 | B1EYP0 | 486623 |
| P16387 | 4932   | D1YWP3 | 304371 | B1FPM6 | 396596 |
| P26267 | 6253   | D2BET0 | 479432 | B1G7C9 | 396598 |
| P26268 | 6253   | D2NQG0 | 680646 | B1GFG5 | 486620 |
| P26269 | 6253   | D2PMN3 | 479435 | B1HV12 | 444177 |
| P26284 | 10116  | D2RM10 | 591001 | B1HXF2 | 444177 |
| P29803 | 9606   | D2S5H1 | 526225 | B1ICB8 | 487214 |
| P29804 | 9823   | D2UDX7 | 380358 | B1IM79 | 498213 |
| P32473 | 4932   | D3FPS8 | 398511 | B1IPG9 | 481805 |
| P35486 | 10090  | D3G018 | 398511 | B1JVT3 | 406425 |
| P35487 | 10090  | D3HTD9 | 661367 | B1KSB4 | 498214 |
| P49432 | 10116  | D3P1Y0 | 137722 | B1L7M0 | 374847 |
| P51266 | 2787   | D3P9I2 | 639282 | B1L891 | 126740 |
| P51267 | 2787   | D3PZE9 | 446470 | B1LDW9 | 439855 |
| P52899 | 6239   | D3QE37 | 698737 | B1MGD0 | 561007 |
| P52900 | 9302   | D3T8X3 | 580331 | B1N211 | 320374 |
| P52901 | 3702   | D4H5Z4 | 522772 | B1QDG7 | 445335 |
| P52902 | 3888   | D4HEB1 | 553199 | B1QQR1 | 445336 |
| P52903 | 4113   | D4YZH1 | 452662 | B1S3K0 | 453362 |
| P52904 | 3888   | D4ZJH9 | 637905 | B1S8L5 | 473819 |
| Q016W5 | 70448  | D5BVG7 | 472759 | B1SCE7 | 471872 |
| Q01MR6 | 4530   | D5DFY2 | 592022 | B1TC47 | 396597 |
| Q06437 | 10116  | D5DL42 | 592022 | B1UMZ3 | 486622 |
| Q09171 | 4896   | D5DRI5 | 545693 | B1VG71 | 504474 |
| Q0CJX0 | 341663 | D5DSM6 | 545693 | B1VMK1 | 455632 |
| Q0CPX2 | 341663 | D5TDI0 | 423212 | B1W2R9 | 455632 |
| Q0CRE7 | 341663 | D5TUX8 | 714359 | B1WT18 | 43989  |
| Q0J0H4 | 39947  | D5UWZ1 | 521096 | B1XGM2 | 316385 |
| Q0U5F0 | 13684  | D5V4J4 | 572480 | B1XI27 | 32049  |
| Q0UIH2 | 13684  | D5VDR1 | 509190 | B1XXB2 | 395495 |
| Q10489 | 4896   | D5WIV3 | 640511 | B1Y209 | 395495 |
| Q10G38 | 39947  | D5WQR8 | 562970 | B1Y8Z9 | 444157 |
| Q10G39 | 39947  | D5WSM1 | 562970 | B1YI38 | 262543 |
| Q16IL3 | 7159   | D6XVC0 | 439292 | B1YTC1 | 398577 |
| Q17AH1 | 7159   | D6Y6E1 | 469371 | B1ZWE8 | 452637 |
| Q17AH2 | 7159   | D6Z8R5 | 640132 | B2A3W6 | 457570 |
| Q17D51 | 7159   | D7A5Y6 | 639283 | B2AH46 | 164546 |
| Q1ACLO | 55564  | D7ANZ2 | 583358 | B2DRM3 | 453363 |
| Q1EGE2 | 70075  | D7B5A2 | 446468 | B2DTN0 | 453364 |
| Q1EGE3 | 70075  | D7CRN5 | 649638 | B2DY74 | 453365 |

|        |        |         |        |        |        |
|--------|--------|---------|--------|--------|--------|
| Q1EGE4 | 70075  | D7CYM9  | 691437 | B2E593 | 453366 |
| Q1EGE5 | 291624 | D7D4S4  | 691437 | B2GH78 | 378753 |
| Q1EGH7 | 70075  | O53203  | 1773   | B2H0H3 | 331109 |
| Q1EGH1 | 70075  | P39633  | 1423   | B2HVT4 | 405416 |
| Q1EGI2 | 291624 | P50735  | 1423   | B2HZS7 | 405416 |
| Q1HPJ1 | 7091   | Q02PN0  | 208963 | B2IEJ1 | 395963 |
| Q1KSF0 | 5811   | Q0A4W8  | 187272 | B2IQA4 | 516950 |
| Q1LVS0 | 7955   | Q0AKI2  | 394221 | B2J2W4 | 63737  |
| Q1XDM0 | 2788   | Q0B893  | 339670 | B2JGW2 | 391038 |
| Q1XDM1 | 2788   | Q0BXL2  | 228405 | B2KCG1 | 445932 |
| Q231N2 | 312017 | Q0HJL1  | 60480  | B2N2M1 | 344610 |
| Q23JH9 | 312017 | Q0K BX7 | 381666 | B2NS03 | 444451 |
| Q23KL2 | 312017 | Q0RUA8  | 326424 | B2P625 | 444452 |
| Q27YD8 | 4922   | Q0VP55  | 393595 | B2PNK5 | 444453 |
| Q28G62 | 8364   | Q128V8  | 296591 | B2Q5T9 | 471874 |
| Q29AC1 | 46245  | Q12NG3  | 318161 | B2RKJ1 | 431947 |
| Q29IF6 | 46245  | Q13LC7  | 266265 | B2S8W5 | 430066 |
| Q29IF7 | 46245  | Q15UB8  | 342610 | B2SDV3 | 441952 |
| Q2H5C3 | 38033  | Q18CS0  | 272563 | B2SYL9 | 398527 |
| Q2H6J1 | 38033  | Q1AT32  | 266117 | B2TLD1 | 508765 |
| Q2HTC6 | 3880   | Q1B5W3  | 164756 | B2U3E5 | 344609 |
| Q2KH68 | 242507 | Q1BP79  | 331271 | B2UFJ1 | 402626 |
| Q2QM55 | 39947  | Q1ICM8  | 384676 | B2UP90 | 349741 |
| Q2T9Y3 | 9913   | Q1MA37  | 216596 | B2UUI0 | 512562 |
| Q2U738 | 5062   | Q1QAX4  | 335284 | B2V1W6 | 508767 |
| Q2UBL6 | 5062   | Q21JX1  | 203122 | B2VEU7 | 338565 |
| Q2ULS2 | 5062   | Q21YB1  | 338969 | B3AA50 | 478004 |
| Q32RM2 | 35869  | Q2FZU5  | 93061  | B3ATA1 | 478005 |
| Q32RS0 | 102822 | Q2GBW4  | 279238 | B3B351 | 478006 |
| Q38799 | 3702   | Q2K2T8  | 347834 | B3BJS9 | 478008 |
| Q388X3 | 5691   | Q2P230  | 342109 | B3BY31 | 478007 |
| Q3B8A4 | 8355   | Q2RN38  | 269796 | B3DP13 | 205913 |
| Q3HVN3 | 4113   | Q2SD03  | 349521 | B3DXA7 | 481448 |
| Q3UFJ3 | 10090  | Q2WBE0  | 342108 | B3E388 | 398767 |
| Q4DB91 | 5693   | Q2YLG9  | 359391 | B3EEP5 | 290315 |
| Q4DXQ0 | 5693   | Q2YWS8  | 273036 | B3ESG9 | 452471 |
| Q4FZZ4 | 10116  | Q397W0  | 269483 | B3EUE2 | 452471 |
| Q4P1A8 | 5270   | Q3BS58  | 316273 | B3H0U1 | 537457 |
| Q4P7Q9 | 5270   | Q3IGZ0  | 326442 | B3HJ16 | 340184 |
| Q4Q9R8 | 5664   | Q3ILZ7  | 348780 | B3HR05 | 340197 |
| Q4QDQ1 | 5664   | Q3J6X6  | 323261 | B3IB67 | 340185 |
| Q4SFM3 | 99883  | Q3YSF5  | 269484 | B3IJU9 | 340186 |
| Q4WEY1 | 5085   | Q472M5  | 264198 | B3JAM7 | 405536 |
| Q4WHM5 | 5085   | Q47M08  | 269800 | B3KT18 | 9606   |
| Q4WJ75 | 5085   | Q480K5  | 167879 | B3KV55 | 9606   |
| Q4Y6X7 | 5825   | Q48FX7  | 264730 | B3LA84 | 5851   |

|        |        |        |        |        |        |
|--------|--------|--------|--------|--------|--------|
| Q4YXR1 | 5821   | Q49V91 | 342451 | B3LAJ5 | 5851   |
| Q54C70 | 44689  | Q49W97 | 342451 | B3LV21 | 7217   |
| Q55M90 | 5207   | Q4KD35 | 220664 | B3M317 | 7217   |
| Q57ZD2 | 5691   | Q4L4X4 | 279808 | B3P7D7 | 7220   |
| Q5A0Z9 | 5476   | Q4UVV9 | 314565 | B3P8B7 | 7220   |
| Q5A5V6 | 5476   | Q4ZVQ0 | 205918 | B3PIL2 | 498211 |
| Q5AQM7 | 162425 | Q57B70 | 235    | B3QL55 | 517417 |
| Q5B2R8 | 162425 | Q5E5B7 | 312309 | B3QU23 | 517418 |
| Q5BK15 | 8364   | Q5HBK7 | 254945 | B3RBG0 | 164546 |
| Q5BSR1 | 6182   | Q5HHC7 | 93062  | B3SB32 | 10228  |
| Q5DFX8 | 6182   | Q5HQB3 | 176279 | B3T4F8 | 455574 |
| Q5DLW4 | 70075  | Q5KXR6 | 1462   | B3TAG7 | 455603 |
| Q5ECP6 | 4102   | Q5L3K6 | 1462   | B3TCA2 | 455612 |
| Q5F426 | 9031   | Q5P3E4 | 76114  | B3W6Y4 | 543734 |
| Q5JPU0 | 9606   | Q5QX66 | 135577 | B3WNY1 | 344601 |
| Q5JPU3 | 9606   | Q5WGV8 | 66692  | B3X2B4 | 358708 |
| Q5K8I1 | 5207   | Q5WWK9 | 297245 | B3XG27 | 358709 |
| Q5KES4 | 5207   | Q5X4Y1 | 297246 | B3XZH7 | 86029  |
| Q5R490 | 9601   | Q5ZV59 | 272624 | B3XZH8 | 86029  |
| Q5R755 | 9601   | Q607S1 | 414    | B3YG31 | 439842 |
| Q5RE79 | 9601   | Q60A41 | 414    | B3YKI7 | 439842 |
| Q5VGY3 | 5833   | Q63DP1 | 288681 | B3YRI6 | 405917 |
| Q5VGY4 | 5833   | Q65I01 | 279010 | B3Z7M7 | 451707 |
| Q5XGY5 | 8355   | Q67Q62 | 2734   | B3ZU13 | 451709 |
| Q654V6 | 39947  | Q6FYF6 | 803    | B3ZZ86 | 454168 |
| Q66JA7 | 8355   | Q6G5B9 | 38323  | B4A127 | 454168 |
| Q6B8T1 | 285951 | Q6GAW8 | 282459 | B4AJQ9 | 536229 |
| Q6B8T2 | 285951 | Q6GID0 | 282458 | B4AKG2 | 536229 |
| Q6BI75 | 4959   | Q6LRA3 | 74109  | B4APU8 | 545422 |
| Q6BUP4 | 4959   | Q6MPX2 | 959    | B4B6W9 | 497965 |
| Q6C0Y7 | 4952   | Q73B03 | 222523 | B4BL27 | 495036 |
| Q6C4G4 | 4952   | Q7A1B9 | 196620 | B4BQY6 | 495036 |
| Q6CKM3 | 28985  | Q7A6H8 | 158879 | B4D5I8 | 497964 |
| Q6DEB0 | 8355   | Q7D728 | 1773   | B4DGN5 | 9606   |
| Q6DGZ9 | 7955   | Q7MKX5 | 196600 | B4DMF5 | 9606   |
| Q6FKF1 | 5478   | Q7NTH1 | 536    | B4DMG8 | 9606   |
| Q6FMM4 | 5478   | Q7TYH9 | 1765   | B4E0N9 | 9606   |
| Q6GR17 | 8355   | Q81F58 | 226900 | B4EEU7 | 216591 |
| Q6KCM1 | 3039   | Q81SY3 | 1392   | B4F018 | 529507 |
| Q6NX32 | 8364   | Q82DA7 | 33903  | B4F9J5 | 4577   |
| Q6P948 | 7955   | Q83CA2 | 777    | B4FFP2 | 4577   |
| Q6Z1G7 | 39947  | Q87DA1 | 183190 | B4G3Y5 | 7234   |
| Q6Z5N4 | 39947  | Q87PB5 | 670    | B4G4C1 | 7234   |
| Q6ZYP7 | 5061   | Q88L55 | 160488 | B4HFD8 | 7238   |
| Q74ZU5 | 33169  | Q895H9 | 1513   | B4HG10 | 7238   |
| Q75EB0 | 33169  | Q89C03 | 375    | B4JRH4 | 7222   |

|        |        |        |        |        |        |
|--------|--------|--------|--------|--------|--------|
| Q7K5K3 | 7227   | Q8CJY0 | 1902   | B4JRQ0 | 7222   |
| Q7KVX1 | 7227   | Q8CPU5 | 176280 | B4K740 | 7230   |
| Q7Q2S3 | 7165   | Q8D9G3 | 672    | B4KAW1 | 7230   |
| Q7R908 | 73239  | Q8D9G4 | 672    | B4KAW2 | 7230   |
| Q7RRB2 | 73239  | Q8EDZ7 | 70863  | B4LXF2 | 7244   |
| Q7RYJ2 | 5141   | Q8EQ98 | 182710 | B4LXF3 | 7244   |
| Q7T368 | 7955   | Q8FYP5 | 29461  | B4MOC5 | 7244   |
| Q7XTJ3 | 39947  | Q8IAM0 | 36329  | B4N918 | 7260   |
| Q7YU05 | 7227   | Q8RA84 | 119072 | B4N9E8 | 7260   |
| Q852R9 | 161934 | Q8RAK8 | 119072 | B4PL48 | 7245   |
| Q852S0 | 161934 | Q8RG30 | 76856  | B4PN68 | 7245   |
| Q85FX1 | 45157  | Q92KX8 | 382    | B4QSD4 | 7240   |
| Q85FX2 | 45157  | Q98ES5 | 381    | B4R1F7 | 7240   |
| Q86HX0 | 44689  | Q99VD0 | 158878 | B4R8T2 | 450851 |
| Q8H1Y0 | 3702   | Q9ABY2 | 155892 | B4RGD7 | 450851 |
| Q8HXW9 | 9541   | Q9HZE0 | 287    | B4RN81 | 521006 |
| Q8I111 | 6239   | Q9K5Z3 | 86665  | B4RV54 | 314275 |
| Q8IGJ4 | 7227   | Q9K9D0 | 86665  | B4S8U0 | 290512 |
| Q8IIB8 | 36329  | Q9KCE9 | 86665  | B4SUI7 | 423368 |
| Q8ILO9 | 36329  | Q9KRZ1 | 666    | B4T3Y9 | 423368 |
| Q8LAI3 | 3702   | Q9PBP9 | 2371   | B4TGD6 | 454169 |
| Q8MA03 | 96477  | A0JYF8 | 290399 | B4TKC5 | 454169 |
| Q8SQM8 | 6035   | A0LNB5 | 335543 | B4TUB6 | 439843 |
| Q8SS26 | 6035   | A0NWT6 | 384765 | B4TXW5 | 439843 |
| Q95VS5 | 278021 | A0Y1E5 | 156578 | B4U375 | 552526 |
| Q9C6Z3 | 3702   | A0YYR7 | 313612 | B4UC71 | 447217 |
| Q9D051 | 10090  | A1APQ5 | 338966 | B4UL58 | 447217 |
| Q9D9X9 | 10090  | A1EQD0 | 345076 | B4V7F3 | 465541 |
| Q9LDY2 | 3702   | A1F7S7 | 412614 | B4VK35 | 118168 |
| Q9MAM6 | 3702   | A1HLZ4 | 401526 | B4WTC6 | 91464  |
| Q9MUR4 | 41882  | A1HSF6 | 401526 | B4WX92 | 236097 |
| Q9P3R3 | 5141   | A1RT74 | 384616 | B5BA76 | 554290 |
| Q9SAV3 | 3702   | A1RVI3 | 384616 | B5BI57 | 554290 |
| Q9TLS2 | 2771   | A1TCE6 | 350058 | B5BZB3 | 439846 |
| Q9TLS3 | 2771   | A1UR01 | 360095 | B5C299 | 439846 |
| Q9W4H4 | 7227   | A1WVU5 | 349124 | B5CFX7 | 454165 |
| Q9W4H6 | 7227   | A2BL51 | 415426 | B5CIL9 | 454165 |
| Q9ZQY0 | 4577   | A2PAL3 | 412966 | B5CM20 | 471875 |
| Q9ZQY1 | 4577   | A2PQR5 | 412883 | B5DPT4 | 46245  |
| Q9ZQY2 | 4577   | A2V2U0 | 399804 | B5E539 | 512566 |
| Q9ZQY3 | 4577   | A2VKJ9 | 348776 | B5E987 | 404380 |
|        |        | A2VY28 | 350702 | B5F4F2 | 454166 |
|        |        | A2WFG3 | 350701 | B5F852 | 454166 |
|        |        | A3D5C0 | 325240 | B5FJE2 | 439851 |
|        |        | A3EMV6 | 345075 | B5FTN9 | 439851 |
|        |        | A3GPF0 | 417399 | B5GKV5 | 465543 |

|        |        |        |        |
|--------|--------|--------|--------|
| A3H2C3 | 417400 | B5HT00 | 463191 |
| A3IB39 | 388400 | B5ICF2 | 439481 |
| A3IL52 | 391612 | B5IVF4 | 391623 |
| A3JK00 | 270374 | B5J9T0 | 391626 |
| A3KWA1 | 350704 | B5JE84 | 382464 |
| A3LA48 | 350703 | B5JF32 | 382464 |
| A3MWK6 | 410359 | B5K4W5 | 391616 |
| A3RTJ2 | 342110 | B5KBH2 | 391616 |
| A3TQZ7 | 313589 | B5L6W8 | 6689   |
| A3UEH2 | 314254 | B5MQ26 | 439847 |
| A3UZH4 | 314291 | B5MSW9 | 439847 |
| A3WPC1 | 314276 | B5MZL9 | 440534 |
| A3Y3X2 | 314290 | B5N2U8 | 440534 |
| A3YHB0 | 314277 | B5NA84 | 454167 |
| A3ZUB7 | 314230 | B5NAD5 | 454167 |
| A4A3G4 | 314285 | B5NU80 | 454231 |
| A4BNN6 | 314278 | B5NVR5 | 454231 |
| A4BV92 | 314278 | B5P0Q1 | 454164 |
| A4CC90 | 87626  | B5P7Y8 | 454164 |
| A4KJM5 | 395095 | B5PH00 | 465518 |
| A4WM05 | 340102 | B5PKB9 | 465518 |
| A4WMJ4 | 340102 | B5PP90 | 465516 |
| A5CFM8 | 357244 | B5PZA5 | 465516 |
| A5F840 | 345073 | B5QAA0 | 465517 |
| A5G5J9 | 351605 | B5QDE1 | 465517 |
| A5IFK8 | 400673 | B5QT82 | 1582   |
| A5ING2 | 390874 | B5QWJ4 | 550537 |
| A5L4F1 | 391574 | B5R2X5 | 550537 |
| A5P981 | 161528 | B5R905 | 550538 |
| A5TX97 | 393480 | B5S8H2 | 305    |
| A5UU09 | 357808 | B5SG61 | 564066 |
| A5VNF6 | 444178 | B5URX9 | 405533 |
| A6A6L5 | 417398 | B5W8D8 | 513049 |
| A6B6T9 | 419109 | B5WHU7 | 516466 |
| A6CBA5 | 344747 | B5X0T5 | 8030   |
| A6CK18 | 161544 | B5X1B8 | 8030   |
| A6CP62 | 161544 | B5XRH1 | 507522 |
| A6CR94 | 161544 | B5XS60 | 507522 |
| A6D6G0 | 391591 | B5Y6Y1 | 309798 |
| A6EXA6 | 443152 | B5YQ50 | 444450 |
| A6F0Y7 | 443152 | B5Z871 | 563041 |
| A6LJS6 | 391009 | B6AZK9 | 314270 |
| A6LKL9 | 391009 | B6BA15 | 439496 |
| A6WVM7 | 439375 | B6BG40 | 439496 |
| A6XUY9 | 404974 | B6BKM6 | 439483 |
| A6Y606 | 345074 | B6BYE6 | 473788 |

|        |        |        |        |
|--------|--------|--------|--------|
| A7BKE8 | 422288 | B6BZE1 | 473788 |
| A7HLX9 | 381764 | B6FJG4 | 500632 |
| A7K626 | 150340 | B6FVZ6 | 500633 |
| A7NKS4 | 383372 | B6GCU1 | 445975 |
| A8F3U9 | 416591 | B6IBI2 | 409438 |
| A8MAL7 | 397948 | B6JIA2 | 504832 |
| A8PNX1 | 59196  | B6JMR5 | 570508 |
| A8TOY8 | 314289 | B6KQJ7 | 508771 |
| A8TXS5 | 331869 | B6WSB9 | 411464 |
| A8YF61 | 267872 | B6XAW7 | 520999 |
| A9AZT9 | 316274 | B6XS18 | 566552 |
| A9CUL4 | 411684 | B6YSV5 | 523850 |
| A9EJA0 | 314608 | B7A1X9 | 502346 |
| A9M7R4 | 483179 | B7A595 | 498848 |
| A9VKT4 | 315730 | B7A596 | 498848 |
| A9WCC4 | 324602 | B7AWD8 | 483218 |
| A9WEM0 | 324602 | B7BDK4 | 537006 |
| B0A7U3 | 445973 | B7C7D7 | 518637 |
| B0AM54 | 486624 | B7CLI9 | 557724 |
| B0CFT6 | 329726 | B7DT50 | 543302 |
| B0CJ82 | 470137 | B7GHM2 | 491915 |
| B0DLZ4 | 486041 | B7GSG9 | 391904 |
| B0JQI9 | 449447 | B7GVU6 | 557600 |
| B0K190 | 399726 | B7GXT1 | 557600 |
| B0Q2D0 | 486619 | B7HHP4 | 405532 |
| B0R2S8 | 478009 | B7HKZ9 | 405534 |
| B0R537 | 478009 | B7I8U8 | 480119 |
| B0UFW9 | 426117 | B7IAQ4 | 480119 |
| B1EYPO | 486623 | B7IG24 | 484019 |
| B1FDF3 | 396596 | B7IP68 | 405531 |
| B1G0J4 | 396598 | B7JGX6 | 405535 |
| B1GFG5 | 486620 | B7JYG4 | 41431  |
| B1L891 | 126740 | B7K9R8 | 65393  |
| B1QDG7 | 445335 | B7L300 | 440085 |
| B1QQR1 | 445336 | B7L6N4 | 585055 |
| B1T670 | 396597 | B7LQ31 | 585054 |
| B1UMZ3 | 486622 | B7M1H3 | 585034 |
| B1WT18 | 43989  | B7MAX1 | 585035 |
| B1XI27 | 32049  | B7MVN9 | 585397 |
| B1Y8Z9 | 444157 | B7N596 | 585056 |
| B1ZWE8 | 452637 | B7NT17 | 585057 |
| B2IEJ1 | 395963 | B7P4E1 | 6945   |
| B2S8W5 | 430066 | B7QWT2 | 439497 |
| B3DXA7 | 481448 | B7R2V8 | 246969 |
| B3JAM7 | 405536 | B7R7L2 | 391606 |
| B3XZH7 | 86029  | B7RCI9 | 443254 |



|        |        |        |        |
|--------|--------|--------|--------|
| B3XZH8 | 86029  | B7RH26 | 391589 |
| B3YRI6 | 405917 | B7STY6 | 4442   |
| B3Z7M7 | 451707 | B7USE2 | 574521 |
| B3ZU13 | 451709 | B7WR10 | 399795 |
| B4AKG2 | 536229 | B7X125 | 399795 |
| B4B6W9 | 497965 | B7ZZ39 | 4577   |
| B4BL27 | 495036 | B8A4B0 | 7955   |
| B4D5I8 | 497964 | B8D6P6 | 490899 |
| B4RV54 | 314275 | B8DA65 | 552536 |
| B4VG18 | 465541 | B8G0B1 | 272564 |
| B4VK35 | 118168 | B8G4T1 | 326427 |
| B4W5N0 | 391600 | B8G8N4 | 326427 |
| B4WTC6 | 91464  | B8GSN0 | 396588 |
| B4X3K2 | 236097 | B8H6K7 | 452863 |
| B5GHN1 | 465543 | B8HN81 | 395961 |
| B5H187 | 443255 | B8I5M4 | 394503 |
| B5HD85 | 457429 | B8IGL7 | 460265 |
| B5I834 | 463191 | B8IZX9 | 525146 |
| B5IVF4 | 391623 | B8J999 | 455488 |
| B5JF32 | 382464 | B8JGR7 | 455488 |
| B5S4E1 | 305    | B8KKZ0 | 566466 |
| B5SCB2 | 305    | B8KWA2 | 565045 |
| B5URX9 | 405533 | B8Y4H6 | 1894   |
| B5WP29 | 516466 | B8ZK25 | 561276 |
| B6BG40 | 439496 | B9AEN0 | 483214 |
| B6C5Q5 | 473788 | B9B972 | 513051 |
| B6FVZ6 | 500633 | B9BXG1 | 513052 |
| B6R1Y8 | 439495 | B9CJN7 | 513053 |
| B6W713 | 561177 | B9CKM5 | 553184 |
| B6Y9H2 | 569881 | B9CQM1 | 553212 |
| B6YSV5 | 523850 | B9CX16 | 591023 |
| B7DT50 | 543302 | B9DIU1 | 396513 |
| B7DUC0 | 543302 | B9DRY4 | 218495 |
| B7IG24 | 484019 | B9E5H1 | 583346 |
| B7JYG4 | 41431  | B9EAN0 | 458233 |
| B7K9R8 | 65393  | B9FGE7 | 39947  |
| B7L300 | 440085 | B9I5Y2 | 3694   |
| B7R2V8 | 246969 | B9ICE5 | 3694   |
| B7R7L2 | 391606 | B9IPQ2 | 3694   |
| B7RCI9 | 443254 | B9IVL3 | 361100 |
| B8G4T1 | 326427 | B9K9V6 | 309803 |
| B8G8N4 | 326427 | B9KDG9 | 306263 |
| B8HN81 | 395961 | B9KKE0 | 557760 |
| B8IGL7 | 460265 | B9KZK6 | 309801 |
| B8KE79 | 391586 | B9LED0 | 480224 |
| B8L4T8 | 391601 | B9LH26 | 480224 |

|        |        |        |        |
|--------|--------|--------|--------|
| B9AZL8 | 513051 | B9LN57 | 416348 |
| B9BHG0 | 513052 | B9LUS4 | 416348 |
| B9C1G4 | 513053 | B9LZJ9 | 316067 |
| B9CQM1 | 553212 | B9MAJ1 | 535289 |
| B9K9V6 | 309803 | B9MEN4 | 535289 |
| B9KZK6 | 309801 | B9MHY9 | 535289 |
| B9LED0 | 480224 | B9MUV2 | 3694   |
| B9LH26 | 480224 | B9NAP2 | 3694   |
| B9LUS4 | 416348 | B9NP16 | 467661 |
| B9QVX9 | 244592 | B9PY05 | 5811   |
| B9WPP9 | 2252   | B9QLJ6 | 432359 |
| B9XLJ6 | 320771 | B9RA12 | 3988   |
| C0DS07 | 546274 | B9SEE3 | 3988   |
| C0EQX2 | 546264 | B9SHF8 | 3988   |
| C0G3Z3 | 595497 | B9WPP9 | 2252   |
| C0GCV7 | 555088 | B9XLJ6 | 320771 |
| C0GDU8 | 555088 | B9XW63 | 544405 |
| C0RGS5 | 546272 | B9XZU7 | 544406 |
| C0WE93 | 563191 | C0ATZ8 | 471881 |
| C1B758 | 632772 | C0BB24 | 470146 |
| C1BAD2 | 632772 | C0BIH7 | 487796 |
| C1PEX5 | 345219 | C0BLL5 | 487797 |
| C1V8W8 | 469382 | C0BUC3 | 547043 |
| C1V8W9 | 469382 | C0BX65 | 553973 |
| C2BEX3 | 525254 | C0BZQ2 | 553973 |
| C2CA41 | 592313 | C0E4U7 | 566549 |
| C2CJ21 | 525255 | C0E9U2 | 537013 |
| C2G976 | 548473 | C0ENR3 | 546264 |
| C2HRQ4 | 593585 | C0ETW9 | 411469 |
| C2I332 | 593586 | C0FPZ9 | 622312 |
| C2JIL3 | 593587 | C0G3Z3 | 595497 |
| C2LVV9 | 629742 | C0GCV7 | 555088 |
| C2MIF5 | 526973 | C0GDU8 | 555088 |
| C2MYI3 | 526980 | C0HA51 | 8030   |
| C2NFA2 | 526970 | C0M727 | 553482 |
| C2NWI2 | 526967 | C0MEK1 | 553483 |
| C2PCK9 | 526971 | C0Q339 | 476213 |
| C2PT40 | 526972 | C0Q6Y4 | 476213 |
| C2PTM6 | 526972 | C0QGH3 | 177437 |
| C2Q9M6 | 526968 | C0QWK1 | 565034 |
| C2QQN5 | 526977 | C0RGS5 | 546272 |
| C2R5R6 | 526969 | C0VJB9 | 525244 |
| C2RKR4 | 526974 | C0VLI3 | 525244 |
| C2S1D5 | 526975 | C0VV97 | 548477 |
| C2SH92 | 526976 | C0W243 | 525245 |
| C2SHI1 | 526976 | C0W5L5 | 525246 |

|        |        |        |        |
|--------|--------|--------|--------|
| C2SYL9 | 526978 | C0WKF5 | 525260 |
| C2TE71 | 526979 | C0X578 | 491074 |
| C2TUJ7 | 526981 | C0XIV4 | 525327 |
| C2TUY9 | 526981 | C0XS81 | 525263 |
| C2UBI8 | 526982 | C0Y6L1 | 595498 |
| C2UT11 | 526983 | C0YUW1 | 525257 |
| C2V554 | 526983 | C0Z4V2 | 358681 |
| C2V919 | 526984 | C0ZCA2 | 358681 |
| C2V9F9 | 526984 | C1A1R9 | 234621 |
| C2VRC2 | 526985 | C1A8S6 | 379066 |
| C2W5M3 | 526986 | C1ARQ2 | 632772 |
| C2W609 | 526986 | C1AV88 | 632772 |
| C2WK38 | 526987 | C1AVT4 | 632772 |
| C2X518 | 526988 | C1B589 | 632772 |
| C2X9H1 | 526989 | C1B5G6 | 632772 |
| C2XRM5 | 526990 | C1B6F7 | 632772 |
| C2Y8C7 | 526991 | C1C7T1 | 488221 |
| C2YPB2 | 526992 | C1CEQ8 | 488222 |
| C2Z5J5 | 526993 | C1CL37 | 488223 |
| C2ZHT5 | 526993 | C1CR03 | 487213 |
| C2ZLS1 | 526994 | C1CX96 | 546414 |
| C2ZM61 | 526994 | C1CX97 | 546414 |
| C3A345 | 526997 | C1D8T0 | 557598 |
| C3A3A4 | 526997 | C1DWD7 | 204536 |
| C3AJ94 | 526998 | C1EMY8 | 572264 |
| C3AJL7 | 526998 | C1F3U4 | 240015 |
| C3B148 | 526999 | C1FNV0 | 536232 |
| C3B1F8 | 526999 | C1HLD1 | 469598 |
| C3BHS2 | 527000 | C1HYU7 | 528345 |
| C3BI67 | 527000 | C1I8B3 | 457396 |
| C3BZZ6 | 527024 | C1M3R4 | 469595 |
| C3CGF9 | 527021 | C1M5E3 | 469595 |
| C3CZB2 | 527025 | C1PEX5 | 345219 |
| C3DHI5 | 527026 | C1V8W8 | 469382 |
| C3E178 | 527027 | C1V8W9 | 469382 |
| C3EIH0 | 527023 | C2BNQ5 | 525264 |
| C3EZ98 | 527022 | C2BYG3 | 525367 |
| C3FHU1 | 527031 | C2CNP2 | 525268 |
| C3G0L7 | 527032 | C2CYM6 | 525310 |
| C3GGG3 | 527029 | C2D848 | 525256 |
| C3GYP2 | 527030 | C2DD07 | 525278 |
| C3HG40 | 527028 | C2DQA1 | 525281 |
| C3HY27 | 527019 | C2EDD3 | 525362 |
| C3IH83 | 527020 | C2EJJ3 | 525364 |
| C3IYR0 | 550542 | C2FDD8 | 525337 |
| C3J4A4 | 550542 | C2FKR1 | 525338 |

|        |        |        |        |
|--------|--------|--------|--------|
| C3JRR2 | 596309 | C2FU68 | 525372 |
| C3KKH2 | 394    | C2FVZ9 | 525372 |
| C3WHI8 | 469599 | C2FZV1 | 525372 |
| C3WRU1 | 469606 | C2G976 | 548473 |
| C3WWJ5 | 457405 | C2GKR8 | 548478 |
| C4IN97 | 641140 | C2GY27 | 548480 |
| C4IT22 | 641140 | C2H567 | 525271 |
| C4RQ40 | 219305 | C2HC73 | 525279 |
| C4W997 | 596319 | C2JJR6 | 491075 |
| C4WH45 | 641118 | C2KTF9 | 585199 |
| C4WJ25 | 641118 | C2LOW2 | 585501 |
| C4ZJN3 | 85643  | C2LEJ3 | 525369 |
| C5A1Q6 | 593117 | C2LTS1 | 596322 |
| C5N438 | 450394 | C2LVV9 | 629742 |
| C5NXG6 | 546270 | C2M4R2 | 553178 |
| C5PY83 | 548474 | C2MIF5 | 526973 |
| C5Q7N8 | 525374 | C2MYI3 | 526980 |
| C5QHR1 | 548475 | C2NFA2 | 526970 |
| C5QQR1 | 525378 | C2NWX2 | 526967 |
| C5QVT1 | 525376 | C2PCK9 | 526971 |
| C5RT38 | 573062 | C2PTM6 | 526972 |
| C5RT45 | 573062 | C2Q9M6 | 526968 |
| C5SJK8 | 573065 | C2QQN5 | 526977 |
| C5TNM1 | 596320 | C2R5R6 | 526969 |
| C5U9S6 | 509193 | C2RKR4 | 526974 |
| C5UB71 | 509193 | C2S1D5 | 526975 |
| C6A3G9 | 604354 | C2SHI1 | 526976 |
| C6HJC6 | 544712 | C2SYL9 | 526978 |
| C6HJC8 | 544712 | C2TE71 | 526979 |
| C6IXD6 | 621372 | C2TUJ7 | 526981 |
| C6JLG8 | 469618 | C2TUY9 | 526981 |
| C6M3Y3 | 547045 | C2UBI8 | 526982 |
| C6MNF5 | 443143 | C2UT11 | 526983 |
| C6N0S9 | 658187 | C2V554 | 526983 |
| C6N5E8 | 658187 | C2V919 | 526984 |
| C6N7I2 | 658187 | C2V9F9 | 526984 |
| C6QPG8 | 581103 | C2VRC2 | 526985 |
| C6R2N3 | 553201 | C2W5M3 | 526986 |
| C6RX96 | 661513 | C2W609 | 526986 |
| C6S9S7 | 663926 | C2WK38 | 526987 |
| C6SNJ8 | 295996 | C2X9H1 | 526989 |
| C6YC53 | 345072 | C2XRM5 | 526990 |
| C7CFH7 | 661410 | C2Y8C7 | 526991 |
| C7HK66 | 588857 | C2YPB2 | 526992 |
| C7HK73 | 588857 | C2Z5J5 | 526993 |
| C7HVG3 | 655811 | C2ZM61 | 526994 |

|        |        |        |        |
|--------|--------|--------|--------|
| C7IT23 | 589861 | C3A345 | 526997 |
| C7IVB2 | 589861 | C3AJ94 | 526998 |
| C7LFT0 | 568815 | C3AJL7 | 526998 |
| C7P2C4 | 485914 | C3B148 | 526999 |
| C7P570 | 485914 | C3B1F8 | 526999 |
| C7QXG9 | 395962 | C3BHS2 | 527000 |
| C7R731 | 523791 | C3BI67 | 527000 |
| C7XMM1 | 469604 | C3BZZ6 | 527024 |
| C7ZVH1 | 585143 | C3CGF9 | 527021 |
| C8A309 | 585145 | C3CZB2 | 527025 |
| C8AAH8 | 585146 | C3DHI5 | 527026 |
| C8AI52 | 585153 | C3E178 | 527027 |
| C8AQJ4 | 585158 | C3EIH0 | 527023 |
| C8KLW3 | 452948 | C3EZ98 | 527022 |
| C8KUA8 | 455227 | C3FHU1 | 527031 |
| C8L6H9 | 553565 | C3G0L7 | 527032 |
| C8LCF4 | 553567 | C3GGG3 | 527029 |
| C8LM30 | 553568 | C3GYP2 | 527030 |
| C8LUV0 | 553571 | C3HG40 | 527028 |
| C8LWX5 | 553573 | C3HY27 | 527019 |
| C8M6F6 | 553581 | C3IH83 | 527020 |
| C8MG48 | 553583 | C3IYR0 | 550542 |
| C8MPL0 | 553588 | C3J4A4 | 550542 |
| C8MRD9 | 553592 | C3JU89 | 596309 |
| C8N4S8 | 553596 | C3K2C9 | 216595 |
| C8PS27 | 596324 | C3KKH2 | 394    |
| C8SWI0 | 536019 | C3KX46 | 515621 |
| C8VY59 | 485916 | C3L9G7 | 568206 |
| C8WXA1 | 521098 | C3MNL1 | 429572 |
| C9MYP5 | 634994 | C3MVT6 | 427317 |
| C9N8V6 | 591167 | C3MX56 | 427317 |
| C9NX03 | 675814 | C3N3F5 | 427318 |
| C9P4T8 | 675813 | C3N4K0 | 427318 |
| C9PDH6 | 675811 | C3NBJ1 | 439386 |
| C9Q6W9 | 675810 | C3ND80 | 439386 |
| C9QI10 | 675816 | C3NIH5 | 419942 |
| C9SP25 | 526221 | C3NKV6 | 419942 |
| C9T509 | 520459 | C3P579 | 592021 |
| C9T7Z1 | 520459 | C3PH96 | 548476 |
| C9TED0 | 520460 | C3RKH6 | 556270 |
| C9TGP3 | 520460 | C3T742 | 562    |
| C9TMR2 | 520463 | C3WAP6 | 469616 |
| C9TRC8 | 520463 | C3X4W9 | 556268 |
| C9TSR0 | 520461 | C3XB31 | 556269 |
| C9TT50 | 520461 | C3XFD4 | 613026 |
| C9U5T7 | 520454 | C3XJS4 | 556267 |

|        |        |        |        |
|--------|--------|--------|--------|
| C9U7G1 | 520454 | C3XQA6 | 7739   |
| C9UF10 | 520452 | C4ANY3 | 320390 |
| C9UGN5 | 520452 | C4F1M2 | 521005 |
| C9UP98 | 520451 | C4F5W7 | 521004 |
| C9UQX5 | 520451 | C4F820 | 521003 |
| C9UVW3 | 520450 | C4FD46 | 518635 |
| C9V082 | 520450 | C4FN67 | 546273 |
| C9V8A3 | 520456 | C4G6Y9 | 592010 |
| C9VDB8 | 520456 | C4GAE3 | 626523 |
| C9VL93 | 520457 | C4GF98 | 629741 |
| C9VMG9 | 520457 | C4IN97 | 641140 |
| C9VUW6 | 520455 | C4KFD0 | 426118 |
| C9VVX2 | 520455 | C4KG51 | 426118 |
| C9WYM9 | 604162 | C4KV59 | 536230 |
| D0AZH6 | 575591 | C4L6L5 | 360911 |
| D0B174 | 575591 | C4LHR0 | 645127 |
| D0B4S8 | 224914 | C4QM82 | 6183   |
| D0BDB8 | 520488 | C4V2L2 | 638302 |
| D0BJ17 | 520488 | C4VE20 | 553209 |
| D0BRP7 | 469603 | C4W997 | 596319 |
| D0GD78 | 520465 | C4WH45 | 641118 |
| D0GHI0 | 520465 | C4X724 | 484021 |
| D0GLV1 | 596323 | C4X7R3 | 484021 |
| D0GVJ2 | 675806 | C4Y7X8 | 306902 |
| D0H8D0 | 675807 | C4Z318 | 515620 |
| D0HGS6 | 675820 | C4Z8N8 | 515619 |
| D0HMR1 | 675808 | C4ZIU4 | 85643  |
| D0HWZ5 | 675809 | C4ZM37 | 85643  |
| D0IAI4 | 675812 | C4ZZB7 | 595496 |
| D0IET5 | 675815 | C5A1Q5 | 593117 |
| D0P8N9 | 520489 | C5A1Q6 | 593117 |
| D0PAQ5 | 520489 | C5AB11 | 626418 |
| D0PHZ3 | 520487 | C5BB17 | 634503 |
| D0PNE2 | 520487 | C5BWF2 | 471853 |
| D0RLL9 | 437701 | C5C851 | 465515 |
| D0W0I2 | 546262 | C5C933 | 465515 |
| D0WBV1 | 546265 | C5CD78 | 521045 |
| D0X0V8 | 674977 | C5CDZ3 | 521045 |
| D0XD73 | 673519 | C5CN50 | 543728 |
| D0XD74 | 673519 | C5D3H7 | 471223 |
| D0XIV4 | 633149 | C5D7D8 | 471223 |
| D1C4B5 | 479434 | C5E973 | 537937 |
| D1CFL6 | 525904 | C5EXX2 | 537972 |
| D1CVG1 | 520449 | C5F9Y0 | 537973 |
| D1CZI5 | 520449 | C5N438 | 450394 |
| D1EM50 | 520462 | C5N7H2 | 436115 |

|        |        |        |        |
|--------|--------|--------|--------|
| D1EQ98 | 520462 | C5PM11 | 525373 |
| D1EZW6 | 520464 | C5PTG7 | 525373 |
| D1F1J5 | 520464 | C5PV37 | 525373 |
| D1F6I8 | 520466 | C5PY83 | 548474 |
| D1FAV2 | 520466 | C5Q7N8 | 525374 |
| D1FHQ5 | 520458 | C5QHR1 | 548475 |
| D1FK13 | 520458 | C5QQR1 | 525378 |
| D1GRD2 | 663951 | C5QVT1 | 525376 |
| D1JAA5 | 115547 | C5RB90 | 585506 |
| D1Q9J2 | 553594 | C5RID0 | 573061 |
| D1QGJ0 | 553601 | C5RT38 | 573062 |
| D1R0C0 | 553574 | C5S0Z8 | 637911 |
| D1RMG8 | 638315 | C5TA65 | 573060 |
| D1S597 | 644283 | C5TB05 | 573060 |
| D1UCM5 | 640510 | C5TKE9 | 596320 |
| D1VUR4 | 596330 | C5U059 | 573059 |
| D1WLB4 | 596317 | C5U9S6 | 509193 |
| D1WVF2 | 649189 | C5UPY2 | 536233 |
| D1XQ50 | 647653 | C5VD14 | 553207 |
| D1YBK5 | 679194 | C5VK09 | 553174 |
| D2C507 | 590168 | C5VLX4 | 553174 |
| D2F573 | 585149 | C5VRL1 | 592027 |
| D2FBQ2 | 585151 | C5W4T4 | 511693 |
| D2FKI1 | 585152 | C5WG08 | 486410 |
| D2FTY3 | 585159 | C5YD28 | 4558   |
| D2FZW5 | 585160 | C5ZCD3 | 357347 |
| D2G8B3 | 585161 | C5ZXL8 | 537970 |
| D2GES1 | 585148 | C6A3G9 | 604354 |
| D2GP28 | 585150 | C6AJR8 | 634176 |
| D2N5S0 | 523796 | C6BC43 | 428406 |
| D2R268 | 530564 | C6BS98 | 526222 |
| D2RXF9 | 543526 | C6CCZ3 | 579405 |
| D2RY65 | 543526 | C6CU94 | 324057 |
| D2RZ42 | 543526 | C6CXF6 | 324057 |
| D2RZC1 | 543526 | C6DJB5 | 561230 |
| D2RZC6 | 543526 | C6DZH6 | 443144 |
| D2S0I1 | 543526 | C6E8X1 | 443144 |
| D2UKS3 | 585155 | C6ECJ6 | 469008 |
| D2UQQ4 | 585147 | C6IXQ9 | 621372 |
| D2YH77 | 671074 | C6J7W9 | 457412 |
| D2YT37 | 671076 | C6LMB6 | 478749 |
| D2ZSM5 | 546266 | C6M0A8 | 598745 |
| D3A3B0 | 546268 | C6MB43 | 153948 |
| D3C3F6 | 648999 | C6MNF5 | 443143 |
| D3EV51 | 703339 | C6N0S9 | 658187 |
| D3MF09 | 679195 | C6N5E8 | 658187 |

|        |        |        |        |
|--------|--------|--------|--------|
| D3MF10 | 679195 | C6P885 | 580327 |
| D3MLG6 | 686659 | C6PTN9 | 536227 |
| D3MSI0 | 596329 | C6QID7 | 582899 |
| D3N116 | 640512 | C6QPG8 | 581103 |
| D3RWS3 | 589924 | C6RAQ4 | 553206 |
| D3SX02 | 547559 | C6RHN9 | 553219 |
| D3SX05 | 547559 | C6RJT5 | 596318 |
| D3T0V9 | 547559 | C6RMH6 | 596318 |
| D3T144 | 547559 | C6RQU4 | 596318 |
| D4CUY0 | 546275 | C6S8E8 | 662598 |
| D4FNV8 | 525375 | C6SBQ2 | 663926 |
| D4FY67 | 645657 | C6SL48 | 295996 |
| D4G2W2 | 645657 | C6SQZ5 | 511691 |
| D4GPR3 | 309800 | C6TDZ0 | 3847   |
| D4GY63 | 309800 | C6TY86 | 320371 |
| D4GY69 | 309800 | C6UJ75 | 413997 |
| D4SQM9 | 427081 | C6UX17 | 544404 |
| D4T216 | 427082 | C6VNY5 | 644042 |
| D4U8Z7 | 553590 | C6VSW5 | 471854 |
| D4UDF8 | 553580 | C6VYT1 | 471854 |
| D4Y2I2 | 634956 | C6WZG7 | 531844 |
| D5AY29 | 449216 | C6XS85 | 485917 |
| D5BVC3 | 472759 | C6XXL3 | 485917 |
| D5MHU6 | 671143 | C6Y3X1 | 485917 |
| D5N0E4 | 703612 | C6YTX8 | 539329 |
| D5N4X9 | 703612 | C7BU49 | 553480 |
| D5N7Z3 | 243261 | C7BXF1 | 592205 |
| D5PH40 | 525368 | C7CFH7 | 661410 |
| D5PPU3 | 525370 | C7CT29 | 565636 |
| D5PT98 | 525370 | C7D3S6 | 565637 |
| D5Q9B1 | 525259 | C7DAG8 | 633131 |
| D5QPZ9 | 595536 | C7DHY8 | 425595 |
| D5RE87 | 525283 | C7G5J4 | 536231 |
| D5S4M2 | 525258 | C7GZY3 | 592031 |
| D5SC00 | 762948 | C7HHQ3 | 572545 |
| D5VZM8 | 758678 | C7HK66 | 588857 |
| D5XVQ2 | 515617 | C7IDC0 | 588581 |
| D5Y565 | 520141 | C7IT23 | 589861 |
| D5YU92 | 515616 | C7LFT0 | 568815 |
| D5Z602 | 537209 | C7LQK9 | 525897 |
| D5ZH62 | 537210 | C7MAV2 | 446465 |
| D5ZZ71 | 566461 | C7MNC8 | 469378 |
| D6AHH9 | 457431 | C7MXH8 | 471857 |
| D6B3K5 | 457425 | C7MZK2 | 471857 |
| D6BDQ7 | 556264 | C7N599 | 471855 |
| D6EV17 | 457428 | C7NKM4 | 478801 |



|        |        |        |        |
|--------|--------|--------|--------|
| D6FJ37 | 611303 | C7NSW5 | 519442 |
| D6FYK6 | 611304 | C7P2A4 | 485914 |
| D6GU59 | 546269 | C7P2C4 | 485914 |
| D6GYE6 | 585156 | C7P570 | 485914 |
| D6HFF7 | 585144 | C7PSY3 | 485918 |
| D6IYV2 | 585157 | C7QXG9 | 395962 |
| D6K2E3 | 645465 | C7R2K2 | 471856 |
| D6LCM6 | 469602 | C7R731 | 523791 |
| D6LGV7 | 469621 | C7U7K5 | 565638 |
| D6LKG7 | 520448 | C7UGI0 | 565642 |
| D6LLF8 | 520448 | C7UP10 | 565641 |
| D6LW48 | 585154 | C7UV78 | 565650 |
| D6SB14 | 525282 | C7V5G4 | 565640 |
| D6SFN9 | 548470 | C7VCG4 | 565644 |
| D6T6S5 | 553577 | C7VNK8 | 565646 |
| D6UBX8 | 762962 | C7VW65 | 565649 |
| D7BVP8 | 749414 | C7W2T1 | 565647 |
| D7E021 | 551115 | C7W9W7 | 565648 |
| D7ETI9 | 515615 | C7WKH6 | 565643 |
| D7H1D6 | 520453 | C7WNY5 | 565651 |
| D7H499 | 520453 | C7X246 | 565645 |
| D7HJJ1 | 412967 | C7X6E5 | 563193 |
| D7I303 | 693985 | C7YAS1 | 565639 |
| D7N0C9 | 641149 | C7ZVH1 | 585143 |
| D7N8L1 | 575609 | C8A309 | 585145 |
| O52310 | 53953  | C8AAH8 | 585146 |
| O59650 | 311400 | C8AI52 | 585153 |
| O74024 | 49899  | C8AQJ4 | 585158 |
| P27346 | 1496   | C8JVB1 | 393124 |
| P28997 | 1258   | C8K3J9 | 393125 |
| P29051 | 2242   | C8K7X8 | 393128 |
| P54386 | 1148   | C8KLW3 | 452948 |
| P80319 | 2261   | C8KUA8 | 455227 |
| P96110 | 2336   | C8L6H9 | 553565 |
| Q02D11 | 234267 | C8LCF4 | 553567 |
| Q081J8 | 318167 | C8LM30 | 553568 |
| Q0E5I0 | 1570   | C8LUV0 | 553571 |
| Q0HV7  | 60481  | C8LWX5 | 553573 |
| Q0SB12 | 101510 | C8M6F6 | 553581 |
| Q0SGX1 | 101510 | C8MG48 | 553583 |
| Q0W8B2 | 351160 | C8MPL0 | 553588 |
| Q0W8B3 | 351160 | C8MRD9 | 553592 |
| Q10WR8 | 203124 | C8N4S8 | 553596 |
| Q12UM4 | 259564 | C8N8B6 | 638300 |
| Q18J04 | 362976 | C8NNN6 | 196164 |
| Q1GQV5 | 117207 | C8NPT9 | 196164 |

|        |        |        |        |
|--------|--------|--------|--------|
| Q1LP59 | 266264 | C8NTT8 | 585529 |
| Q1N646 | 207949 | C8QEF4 | 592316 |
| Q1NA38 | 314266 | C8RTU9 | 525262 |
| Q1QXW3 | 290398 | C8S361 | 371731 |
| Q1RKJ5 | 336407 | C8T607 | 667127 |
| Q1V5E2 | 314288 | C8T6I9 | 667127 |
| Q1Z9A6 | 314280 | C8TSS7 | 573235 |
| Q1ZD05 | 314282 | C8UA24 | 585395 |
| Q1ZD06 | 314282 | C8UBL5 | 585396 |
| Q1ZQY0 | 314292 | C8VY59 | 485916 |
| Q2B639 | 313627 | C8WAA2 | 521095 |
| Q2BHA6 | 207954 | C8WI25 | 479437 |
| Q2BMD5 | 207954 | C8WW69 | 521098 |
| Q2BXZ9 | 121723 | C9A1D2 | 565653 |
| Q2GDP8 | 222891 | C9ACQ0 | 565655 |
| Q2GG64 | 205920 | C9ADJ6 | 565662 |
| Q2GKF6 | 212042 | C9AMB6 | 565663 |
| Q2N6W6 | 314225 | C9B0M9 | 565652 |
| Q2YP74 | 359391 | C9B4P5 | 565658 |
| Q31EJ5 | 317025 | C9BEH6 | 565659 |
| Q3A571 | 338963 | C9BQJ0 | 565657 |
| Q3EN96 | 339854 | C9BZD6 | 565661 |
| Q3IS94 | 348780 | C9C7M6 | 565660 |
| Q3ISK4 | 348780 | C9CAF1 | 565656 |
| Q3KBB0 | 205922 | C9CNZ8 | 565654 |
| Q3M5M1 | 240292 | C9CVM8 | 644076 |
| Q3R4W8 | 155920 | C9KN37 | 500635 |
| Q3RAJ7 | 155920 | C9LB68 | 537007 |
| Q3RC72 | 155919 | C9LQX0 | 592028 |
| Q47950 | 29292  | C9LXX3 | 546271 |
| Q47951 | 39456  | C9M5D0 | 645512 |
| Q4C653 | 165597 | C9MCJ1 | 656913 |
| Q4ED18 | 307502 | C9MIH4 | 656912 |
| Q4FSU4 | 259536 | C9MRD2 | 649761 |
| Q4MGB5 | 269801 | C9NDK4 | 591167 |
| Q4UK71 | 42862  | C9P7J4 | 675813 |
| Q56304 | 2265   | C9PLW8 | 675811 |
| Q57FF3 | 235    | C9PN71 | 667128 |
| Q5FHJ1 | 302409 | C9QTU7 | 536056 |
| Q5GTA1 | 292805 | C9R6N5 | 668336 |
| Q5PB16 | 234826 | C9RNS6 | 59374  |
| Q5V3Y8 | 2238   | C9RV07 | 544556 |
| Q5V4X6 | 2238   | C9S041 | 544556 |
| Q5V6I7 | 2238   | C9T509 | 520459 |
| Q5X2P3 | 297246 | C9TED0 | 520460 |
| Q5Z090 | 37329  | C9TMR2 | 520463 |

|        |        |        |        |
|--------|--------|--------|--------|
| Q5Z0H0 | 37329  | C9TT50 | 520461 |
| Q64BT4 | 285389 | C9U7G1 | 520454 |
| Q64CH4 | 286719 | C9UGN5 | 520452 |
| Q64CM6 | 286721 | C9UQX5 | 520451 |
| Q67KK8 | 2734   | C9UVW3 | 520450 |
| Q68VZ1 | 785    | C9V8A3 | 520456 |
| Q6A837 | 1747   | C9VL93 | 520457 |
| Q6ANZ7 | 84980  | C9VVX2 | 520455 |
| Q6KZF2 | 263820 | C9WY24 | 604162 |
| Q73IE5 | 163164 | C9X5X2 | 568708 |
| Q73XL5 | 1770   | C9XFX9 | 568708 |
| Q7P4E5 | 209882 | C9XIV3 | 645462 |
| Q7P9S4 | 272951 | C9YGH6 | 667019 |
| Q8G2T7 | 29461  | C9YHY9 | 645463 |
| Q8PZY2 | 2209   | C9Z6P4 | 680198 |
| Q8TL71 | 2214   | D0ADQ1 | 565666 |
| Q8YF04 | 29459  | D0ALR7 | 565664 |
| Q8YJ55 | 29459  | D0AZH6 | 575591 |
| Q8ZT48 | 13773  | D0B4S8 | 224914 |
| Q8ZW33 | 13773  | D0BDB8 | 520488 |
| Q92GE9 | 781    | D0BYB4 | 575564 |
| Q977U6 | 2252   | DOC0M9 | 575564 |
| Q977X9 | 90909  | DOC906 | 575584 |
| Q97AN9 | 273116 | DOCCU3 | 575584 |
| Q9F0J1 | 1901   | DOCSZ8 | 644107 |
| Q9HK32 | 2303   | DOCZL4 | 501479 |
| Q9HQE1 | 2242   | D0FSJ4 | 79967  |
| Q9HRM7 | 2242   | DOGHI0 | 520465 |
| Q9HSM4 | 2242   | DOGUP7 | 675806 |
| Q9NGT0 | 5833   | DOHHK9 | 675820 |
| Q9X7B2 | 1769   | DOITD0 | 290847 |
| Q9Y8I4 | 2277   | DOIVD0 | 688245 |
| Q9ZCI2 | 782    | DOJ1V2 | 688245 |
|        |        | DOJ9U8 | 600809 |
|        |        | DOJAG4 | 331104 |
|        |        | DOK0F2 | 684950 |
|        |        | DOK3M6 | 681288 |
|        |        | DOKE64 | 561231 |
|        |        | DOKPB0 | 555311 |
|        |        | DOKPS0 | 555311 |
|        |        | DOKV60 | 555311 |
|        |        | DOL7K3 | 526226 |
|        |        | DOLGK4 | 502025 |
|        |        | DOLHW9 | 502025 |
|        |        | DOLLJ2 | 502025 |
|        |        | DOMD96 | 518766 |

|        |        |
|--------|--------|
| DOPAQ5 | 520489 |
| DOPNE2 | 520487 |
| DORLL9 | 437701 |
| DORSL1 | 469609 |
| DOS072 | 575585 |
| DOS496 | 575585 |
| DOS8G5 | 575586 |
| DOSAL3 | 575586 |
| DOSJC0 | 575587 |
| DOSKD0 | 575587 |
| DOSMD0 | 575587 |
| DOSUU2 | 575588 |
| DOSWA0 | 575588 |
| DOT4P8 | 575589 |
| DOT4U3 | 575589 |
| DOT5I3 | 575589 |
| DOTCW4 | 469589 |
| DOW527 | 546262 |
| DOWEM6 | 649764 |
| DOWLT4 | 649743 |
| DOWS85 | 674977 |
| DOYPN7 | 596328 |
| DOYSR2 | 596328 |
| DOZGL3 | 498217 |
| DOZJ71 | 588858 |
| DOZW30 | 588858 |
| D1A2H6 | 471852 |
| D1AKZ0 | 526218 |
| D1B531 | 525898 |
| D1B825 | 525903 |
| D1B8F3 | 525903 |
| D1BC07 | 446469 |
| D1BEM5 | 446469 |
| D1BPB9 | 479436 |
| D1BVJ5 | 446471 |
| D1BX67 | 446471 |
| D1C4B5 | 479434 |
| D1C557 | 479434 |
| D1CFL6 | 525904 |
| D1CVG1 | 520449 |
| D1D6W1 | 528346 |
| D1DA26 | 528352 |
| D1DGC3 | 528354 |
| D1DQN2 | 528356 |
| D1DXB4 | 528355 |
| D1E3Z9 | 528358 |

|        |        |
|--------|--------|
| D1EA59 | 528359 |
| D1EGY9 | 528360 |
| D1EQ98 | 520462 |
| D1F1J5 | 520464 |
| D1F6I8 | 520466 |
| D1FHQ5 | 520458 |
| D1GRD2 | 663951 |
| D1JAA5 | 115547 |
| D1NLN9 | 492476 |
| D1NWC2 | 561180 |
| D1P0C7 | 500637 |
| D1PC66 | 537011 |
| D1PIU8 | 411471 |
| D1PUP4 | 585502 |
| D1PVJ6 | 585502 |
| D1Q9J2 | 553594 |
| D1QGJ0 | 553601 |
| D1QQK2 | 649760 |
| D1R0C0 | 553574 |
| D1RRM8 | 682634 |
| D1RYM0 | 682634 |
| D1SQ63 | 643561 |
| D1UHF4 | 640510 |
| D1VNC1 | 298654 |
| D1VUR4 | 596330 |
| D1VYL3 | 679189 |
| D1W6L1 | 679190 |
| D1WLB4 | 596317 |
| D1WTX5 | 649189 |
| D1WUS2 | 649189 |
| D1XQ85 | 647653 |
| D1Y2A2 | 352165 |
| D1YDA3 | 679194 |
| D1YQ21 | 686660 |
| D1YWP3 | 304371 |
| D2AFF8 | 591020 |
| D2ALP0 | 510831 |
| D2AZR2 | 479432 |
| D2BFC1 | 479432 |
| D2C507 | 590168 |
| D2EQG4 | 563037 |
| D2F573 | 585149 |
| D2FBQ2 | 585151 |
| D2FKI1 | 585152 |
| D2FTY3 | 585159 |
| D2FZW5 | 585160 |

|        |        |
|--------|--------|
| D2G8B3 | 585161 |
| D2GES1 | 585148 |
| D2GP28 | 585150 |
| D2LZH8 | 649639 |
| D2MN04 | 679192 |
| D2N5S0 | 523796 |
| D2NJ38 | 431946 |
| D2NY56 | 653938 |
| D2PA11 | 637381 |
| D2PHJ8 | 425944 |
| D2PI86 | 425944 |
| D2Q6I5 | 401473 |
| D2QS31 | 504472 |
| D2R268 | 530564 |
| D2RXF9 | 543526 |
| D2RY65 | 543526 |
| D2RZ42 | 543526 |
| D2RZC1 | 543526 |
| D2RZC6 | 543526 |
| D2S0I1 | 543526 |
| D2SGC4 | 526225 |
| D2TB98 | 644651 |
| D2TUK6 | 637910 |
| D2U087 | 638    |
| D2UKS3 | 585155 |
| D2UQQ4 | 585147 |
| D2V2V3 | 5762   |
| D2V6F5 | 5762   |
| D2YJ06 | 671074 |
| D2YQC3 | 671076 |
| D2Z542 | 469381 |
| D2ZB99 | 500639 |
| D2ZPY7 | 521002 |
| D2ZZV4 | 546266 |
| D3AI09 | 566550 |
| D3C045 | 653733 |
| D3D3X2 | 102897 |
| D3DZ61 | 634498 |
| D3EV51 | 703339 |
| D3F4P9 | 469383 |
| D3F9G9 | 469383 |
| D3FPS8 | 398511 |
| D3FUG4 | 398511 |
| D3FWN6 | 398511 |
| D3G018 | 398511 |
| D3GVH4 | 216592 |

|        |        |
|--------|--------|
| D3H869 | 365659 |
| D3HE25 | 637909 |
| D3I165 | 575611 |
| D3I787 | 575612 |
| D3I8X6 | 575612 |
| D3IAQ1 | 575614 |
| D3KL75 | 393121 |
| D3L5E6 | 592015 |
| D3LG75 | 565665 |
| D3LKL2 | 596312 |
| D3LS85 | 596312 |
| D3MGM7 | 679195 |
| D3MP04 | 686659 |
| D3MSI0 | 596329 |
| D3N3Y9 | 640512 |
| D3PM55 | 504728 |
| D3PM56 | 504728 |
| D3QE37 | 698737 |
| D3QUV4 | 701177 |
| D3RAM2 | 640131 |
| D3RH42 | 640131 |
| D3RJ65 | 640131 |
| D3RWS3 | 589924 |
| D3SX02 | 547559 |
| D3SX05 | 547559 |
| D3TOV9 | 547559 |
| D3T144 | 547559 |
| D3T8X3 | 580331 |
| D3TA98 | 439481 |
| D3TQR2 | 37546  |
| D3UGI7 | 679897 |
| D3USF6 | 683837 |
| D3UY64 | 406818 |
| D3VF16 | 406817 |
| D4B8M6 | 500640 |
| D4BAI2 | 500640 |
| D4BLG5 | 518634 |
| D4C241 | 521000 |
| D4CDT0 | 411486 |
| D4CKH1 | 608534 |
| D4DN64 | 546263 |
| D4DYU0 | 667129 |
| D4ED00 | 694569 |
| D4EPZ4 | 699185 |
| D4ERV7 | 699186 |
| D4FNV8 | 525375 |

|        |        |
|--------|--------|
| D4FTM1 | 655813 |
| D4FY67 | 645657 |
| D4G2W2 | 645657 |
| D4GEM7 | 706191 |
| D4GPR3 | 309800 |
| D4GY63 | 309800 |
| D4GY69 | 309800 |
| D4H2E9 | 522772 |
| D4HFC6 | 553199 |
| D4I2J9 | 665029 |
| D4ICQ6 | 716540 |
| D4IQD3 | 717959 |
| D4J2B6 | 657324 |
| D4J437 | 717962 |
| D4JCV2 | 717960 |
| D4JI76 | 657317 |
| D4KF87 | 657316 |
| D4KKW8 | 657315 |
| D4L424 | 718255 |
| D4L843 | 657321 |
| D4LFA8 | 213810 |
| D4LPM4 | 657323 |
| D4LSA1 | 657314 |
| D4M5L5 | 657313 |
| D4M9E2 | 651822 |
| D4MXD7 | 245018 |
| D4N6X9 | 684057 |
| D4N759 | 684059 |
| D4PIU4 | 393117 |
| D4PR78 | 393131 |
| D4Q3R2 | 401650 |
| D4QHVO | 529885 |
| D4QQR5 | 535205 |
| D4R228 | 535206 |
| D4R6G3 | 544875 |
| D4RLZ6 | 546340 |
| D4RMW1 | 547468 |
| D4S0B6 | 511680 |
| D4S8A3 | 585503 |
| D4SAK9 | 585531 |
| D4SLZ9 | 645663 |
| D4TWN4 | 649742 |
| D4U8Z7 | 553590 |
| D4UDF8 | 553580 |
| D4UMW4 | 246199 |
| D4UN78 | 246199 |



|        |        |
|--------|--------|
| D4UYQ9 | 791166 |
| D4VVZ9 | 791161 |
| D4XC87 | 742159 |
| D4XNM2 | 707232 |
| D4XP09 | 707232 |
| D4XRH8 | 707232 |
| D4Y2I2 | 634956 |
| D4YH29 | 655812 |
| D4YQB5 | 585530 |
| D4ZR61 | 696747 |
| D5BBT4 | 655815 |
| D5BCK8 | 655815 |
| D5BM99 | 655815 |
| D5BQY2 | 488538 |
| D5BVC3 | 472759 |
| D5BY05 | 472759 |
| D5CCV4 | 716541 |
| D5D411 | 714962 |
| D5DDK5 | 592022 |
| D5DFY2 | 592022 |
| D5DL42 | 592022 |
| D5DRI5 | 545693 |
| D5DSM6 | 545693 |
| D5E439 | 545693 |
| D5ED85 | 572547 |
| D5EJE7 | 583355 |
| D5EUQ2 | 264731 |
| D5HBJ8 | 761659 |
| D5HDH9 | 751585 |
| D5MHU6 | 671143 |
| D5NOE4 | 703612 |
| D5N4X9 | 703612 |
| D5NRK3 | 243261 |
| D5NU55 | 649754 |
| D5PPW1 | 525370 |
| D5Q9B1 | 525259 |
| D5QPZ9 | 595536 |
| D5R8K4 | 642492 |
| D5S4M2 | 525258 |
| D5S619 | 760570 |
| D5TUX8 | 714359 |
| D5U2J2 | 633148 |
| D5U7Q3 | 526224 |
| D5UHH3 | 446466 |
| D5VAL1 | 749219 |
| D5VZM8 | 758678 |

|        |        |
|--------|--------|
| D5WD52 | 640511 |
| D5WQR8 | 562970 |
| D5WSM1 | 562970 |
| D5WYN1 | 75379  |
| D6A4N4 | 566461 |
| D6A5F7 | 566461 |
| D6AI30 | 457431 |
| D6B9J6 | 457425 |
| D6CN89 | 426114 |
| D6DAY9 | 722911 |
| D6DGX1 | 717608 |
| D6DTW7 | 718254 |
| D6E321 | 657318 |
| D6E6Z1 | 657308 |
| D6EE73 | 457428 |
| D6GDX8 | 469608 |
| D6GN49 | 469608 |
| D6GYE6 | 585156 |
| D6H6N1 | 528348 |
| D6HFF7 | 585144 |
| D6HL81 | 552396 |
| D6HXP2 | 550672 |
| D6IB74 | 550676 |
| D6IQP0 | 656380 |
| D6IYV2 | 585157 |
| D6JA48 | 550677 |
| D6JKW7 | 528351 |
| D6JRN2 | 575565 |
| D6JX36 | 575565 |
| D6KBG9 | 645465 |
| D6KJY8 | 457416 |
| D6KQF5 | 450749 |
| D6KTP9 | 641146 |
| D6L4N0 | 641144 |
| D6LLF8 | 520448 |
| D6LW48 | 585154 |
| D6SFN9 | 548470 |
| D6T6S5 | 553577 |
| D6THA7 | 485913 |
| D6TL40 | 485913 |
| D6UBX8 | 762962 |
| D6UKB7 | 585535 |
| D6V8X3 | 666684 |
| D6VEJ3 | 596153 |
| D6VIC2 | 596153 |
| D6WCS6 | 7070   |

|        |        |
|--------|--------|
| D6X9Z0 | 457429 |
| D6XQU5 | 637913 |
| D6XUQ4 | 439292 |
| D6XVC0 | 439292 |
| D6XX88 | 439292 |
| D6Y2I7 | 469371 |
| D6YQU5 | 712898 |
| D6Z5V7 | 589865 |
| D6ZKH1 | 548479 |
| D6ZS37 | 525381 |
| D6ZX62 | 759350 |
| D7AI85 | 663917 |
| D7ANZ2 | 583358 |
| D7BF42 | 526227 |
| D7BF43 | 526227 |
| D7C6S8 | 749414 |
| D7C9D5 | 749414 |
| D7CNN7 | 643648 |
| D7CYM9 | 691437 |
| D7D4S4 | 691437 |
| D7DB91 | 591019 |
| D7E021 | 551115 |
| D7EIW1 | 7070   |
| D7FCS9 | 693745 |
| D7GFF9 | 754252 |
| D7H1D6 | 520453 |
| D7IN64 | 469592 |
| D7JR10 | 656379 |
| D7L1B5 | 81972  |
| D7LXS2 | 81972  |
| D7M0I9 | 81972  |
| D7N3R1 | 641149 |
| D7NA33 | 563008 |
| O02375 | 6289   |
| O04937 | 4092   |
| O52310 | 53953  |
| O59650 | 311400 |
| O60995 | 5693   |
| O60996 | 5693   |
| O61083 | 5693   |
| O74024 | 49899  |
| O87403 | 1402   |
| O96940 | 5833   |
| P00366 | 9913   |
| P00367 | 9606   |
| P00368 | 9031   |

|        |        |
|--------|--------|
| POC934 | 837    |
| P10860 | 10116  |
| P14657 | 2725   |
| P26443 | 10090  |
| P27346 | 1496   |
| P28724 | 5741   |
| P29051 | 2242   |
| P31026 | 1718   |
| P39633 | 1423   |
| P43793 | 727    |
| P49448 | 9606   |
| P50735 | 1423   |
| P52596 | 29760  |
| P54385 | 7227   |
| P54386 | 1148   |
| P55990 | 210    |
| P80053 | 2287   |
| P80319 | 2261   |
| P82264 | 36190  |
| P93541 | 4081   |
| P96110 | 2336   |
| Q01X95 | 234267 |
| Q02D11 | 234267 |
| Q03M22 | 322159 |
| Q04K22 | 373153 |
| Q095H5 | 378806 |
| Q095S1 | 378806 |
| Q0A6S2 | 187272 |
| Q0AIP4 | 335283 |
| Q0AUZ3 | 335541 |
| Q0BIA1 | 339670 |
| Q0BNP9 | 393011 |
| Q0E5I0 | 1570   |
| Q0FF08 | 367336 |
| Q0FNM4 | 314265 |
| Q0I4P4 | 205914 |
| Q0IG14 | 7159   |
| Q0JBB6 | 39947  |
| Q0JZU7 | 381666 |
| Q0KEF0 | 381666 |
| Q0KHB4 | 6689   |
| Q0RB72 | 326424 |
| Q0RY06 | 101510 |
| Q0SBJ5 | 101510 |
| Q0SC90 | 101510 |
| Q0SGW0 | 101510 |

|        |        |
|--------|--------|
| Q0SJ78 | 101510 |
| Q0SJW1 | 101510 |
| Q0T4W7 | 373384 |
| Q0TH69 | 362663 |
| Q0USN5 | 13684  |
| Q0VMQ0 | 393595 |
| Q0W8B2 | 351160 |
| Q0W8B3 | 351160 |
| Q10WR8 | 203124 |
| Q127Y9 | 296591 |
| Q12UM4 | 259564 |
| Q13UA2 | 266265 |
| Q14J69 | 393115 |
| Q15Z70 | 342610 |
| Q169D8 | 375451 |
| Q16SW1 | 7159   |
| Q17YH3 | 382638 |
| Q18CS0 | 272563 |
| Q18J04 | 362976 |
| Q1BZ56 | 331271 |
| Q1CSJ3 | 357544 |
| Q1D013 | 246197 |
| Q1D4C2 | 246197 |
| Q1GEN4 | 292414 |
| Q1GPE6 | 117207 |
| Q1H5A3 | 3702   |
| Q1HDV6 | 29760  |
| Q1IJ35 | 204669 |
| Q1IT55 | 204669 |
| Q1J137 | 319795 |
| Q1J138 | 319795 |
| Q1JT17 | 383379 |
| Q1K016 | 281689 |
| Q1KYN6 | 222440 |
| Q1LD03 | 266264 |
| Q1LRE2 | 266264 |
| Q1NJF0 | 262489 |
| Q1NW86 | 262489 |
| Q1PVP6 | 174633 |
| Q1QJW6 | 323097 |
| Q1QPK1 | 323097 |
| Q1RB31 | 364106 |
| Q1VBD1 | 314288 |
| Q1VPY8 | 313595 |
| Q1WSM5 | 362948 |
| Q23621 | 6239   |

|        |        |
|--------|--------|
| Q23ZD8 | 312017 |
| Q24BW7 | 312017 |
| Q24BX6 | 312017 |
| Q24MK0 | 138119 |
| Q26B44 | 156586 |
| Q26BC3 | 156586 |
| Q28LQ5 | 290400 |
| Q298M7 | 46245  |
| Q29A69 | 46245  |
| Q2A5D8 | 376619 |
| Q2B639 | 313627 |
| Q2CDB1 | 314256 |
| Q2F5R4 | 7091   |
| Q2FZU5 | 93061  |
| Q2G8V7 | 279238 |
| Q2IDY1 | 290397 |
| Q2IIQ6 | 290397 |
| Q2J4Q6 | 106370 |
| Q2KQ98 | 7159   |
| Q2KU68 | 360910 |
| Q2L0R9 | 360910 |
| Q2LQG2 | 56780  |
| Q2LW88 | 56780  |
| Q2NEG6 | 339860 |
| Q2NWM5 | 343509 |
| Q2S0C1 | 309807 |
| Q2S582 | 309807 |
| Q2SZ78 | 271848 |
| Q2YP74 | 359391 |
| Q2YWS8 | 273036 |
| Q30QE4 | 326298 |
| Q31EJ5 | 317025 |
| Q321Q3 | 300268 |
| Q32GA3 | 300267 |
| Q33E23 | 39947  |
| Q38946 | 3702   |
| Q39JL1 | 269483 |
| Q39WF1 | 269799 |
| Q3A571 | 338963 |
| Q3D0Y7 | 342615 |
| Q3D6F6 | 342616 |
| Q3DFQ8 | 342617 |
| Q3DJH6 | 342614 |
| Q3DQR9 | 342613 |
| Q3EN96 | 339854 |
| Q3IL85 | 326442 |

|         |        |
|---------|--------|
| Q3ILZ7  | 348780 |
| Q3IS94  | 348780 |
| Q3ISK4  | 348780 |
| Q3J0W2  | 272943 |
| Q3J9I2  | 323261 |
| Q3JCR9  | 323261 |
| Q3JNP7  | 320372 |
| Q3M5M1  | 240292 |
| Q3MDV8  | 240292 |
| Q3SQA1  | 323098 |
| Q3XZ31  | 333849 |
| Q3Z2A7  | 300269 |
| Q43260  | 4577   |
| Q43314  | 3702   |
| Q467V9  | 269797 |
| Q46UV2  | 264198 |
| Q475U5  | 264198 |
| Q47950  | 29292  |
| Q47951  | 39456  |
| Q47CI0  | 159087 |
| Q47Q60  | 269800 |
| Q49V91  | 342451 |
| Q49W97  | 342451 |
| Q4C653  | 165597 |
| Q4D5C2  | 5693   |
| Q4DWW8  | 5693   |
| Q4EID3  | 267410 |
| Q4E VW3 | 267409 |
| Q4FLE4  | 198252 |
| Q4JCA3  | 2285   |
| Q4JV01  | 306537 |
| Q4K5S2  | 220664 |
| Q4L4X4  | 279808 |
| Q4MGB5  | 269801 |
| Q4Q7X1  | 5664   |
| Q4QP01  | 281310 |
| Q4S2P6  | 99883  |
| Q4X2W2  | 5825   |
| Q53199  | 394    |
| Q54KB7  | 44689  |
| Q56304  | 2265   |
| Q57FF3  | 235    |
| Q57NL7  | 28901  |
| Q57PY4  | 28901  |
| Q5F2M8  | 3847   |
| Q5F2M9  | 3847   |

|        |        |
|--------|--------|
| Q5F731 | 242231 |
| Q5HHC7 | 93062  |
| Q5HQK3 | 176279 |
| Q5KTR6 | 151740 |
| Q5KXR6 | 1462   |
| Q5L3K6 | 1462   |
| Q5LSM4 | 89184  |
| Q5M148 | 299768 |
| Q5M5N6 | 264199 |
| Q5MBG2 | 2242   |
| Q5NHR7 | 119856 |
| Q5P0F8 | 76114  |
| Q5QDM6 | 3873   |
| Q5QVZ2 | 135577 |
| Q5SI03 | 300852 |
| Q5SI04 | 300852 |
| Q5V3Y8 | 2238   |
| Q5V4X6 | 2238   |
| Q5V6I7 | 2238   |
| Q5WCI5 | 66692  |
| Q5WGV8 | 66692  |
| Q5WMA2 | 146919 |
| Q5X2P3 | 297246 |
| Q5XGI4 | 8364   |
| Q5YQU8 | 37329  |
| Q60A41 | 414    |
| Q62H34 | 13373  |
| Q63DP1 | 288681 |
| Q63QU9 | 28450  |
| Q64BT4 | 285389 |
| Q64CH4 | 286719 |
| Q64CM6 | 286721 |
| Q64HZ8 | 9598   |
| Q64HZ9 | 9580   |
| Q64I00 | 9600   |
| Q64I01 | 9595   |
| Q65GI2 | 279010 |
| Q65I01 | 279010 |
| Q65W57 | 221988 |
| Q67KK8 | 2734   |
| Q6A7K5 | 1747   |
| Q6AJB1 | 84980  |
| Q6ANZ7 | 84980  |
| Q6AZJ0 | 8355   |
| Q6DB50 | 29471  |
| Q6F931 | 62977  |



|        |        |
|--------|--------|
| Q6FD67 | 62977  |
| Q6GAW8 | 282459 |
| Q6GID0 | 282458 |
| Q6H3Y7 | 39947  |
| Q6J667 | 158899 |
| Q6KZF2 | 263820 |
| Q6MPX2 | 959    |
| Q6NZ29 | 7955   |
| Q6P3L9 | 7955   |
| Q6SI43 | 257382 |
| Q722Z0 | 265669 |
| Q72F40 | 882    |
| Q72IC0 | 262724 |
| Q72IC1 | 262724 |
| Q73B03 | 222523 |
| Q73P03 | 158    |
| Q74DL1 | 35554  |
| Q74MJ2 | 228908 |
| Q7A1B9 | 196620 |
| Q7A6H8 | 158879 |
| Q7M823 | 844    |
| Q7NA25 | 141679 |
| Q7NLJ0 | 33072  |
| Q7PHE4 | 7165   |
| Q7RGT5 | 73239  |
| Q7RQ39 | 73239  |
| Q7TPI5 | 10116  |
| Q7UPH7 | 265606 |
| Q7V7V9 | 74547  |
| Q7VGS9 | 32025  |
| Q7VSN6 | 520    |
| Q7VXC5 | 520    |
| Q7WA25 | 519    |
| Q7WEU7 | 518    |
| Q7WJ54 | 518    |
| Q7XN06 | 39947  |
| Q7YWC6 | 6832   |
| Q7ZZK8 | 8030   |
| Q7ZZK9 | 8030   |
| Q7ZZL0 | 8030   |
| Q803T3 | 7955   |
| Q81FS8 | 226900 |
| Q81SY3 | 1392   |
| Q82MM4 | 33903  |
| Q82U80 | 915    |
| Q835G2 | 1351   |

|        |        |
|--------|--------|
| Q83RH0 | 623    |
| Q852M0 | 39947  |
| Q88XM9 | 1590   |
| Q8CPU5 | 176280 |
| Q8DPG0 | 171101 |
| Q8DUL2 | 1309   |
| Q8EQ98 | 182710 |
| Q8FGY8 | 217992 |
| Q8FTJ1 | 152794 |
| Q8G2T7 | 29461  |
| Q8G6L0 | 216816 |
| Q8GR85 | 274    |
| Q8GR86 | 274    |
| Q8ILF7 | 36329  |
| Q8ILTO | 36329  |
| Q8IMY1 | 7227   |
| Q8JHX9 | 8022   |
| Q8JHY1 | 8022   |
| Q8KAX7 | 1097   |
| Q8L6A0 | 4097   |
| Q8PRZ1 | 2209   |
| Q8PZY2 | 2209   |
| Q8RA84 | 119072 |
| Q8RC70 | 119072 |
| Q8RQP4 | 152794 |
| Q8T453 | 7227   |
| Q8TL71 | 2214   |
| Q8W1X4 | 4081   |
| Q8Y256 | 305    |
| Q8Y9G8 | 1639   |
| Q8YF04 | 29459  |
| Q8YPE2 | 103690 |
| Q8ZT48 | 13773  |
| Q8ZW33 | 13773  |
| Q92E91 | 1642   |
| Q930S3 | 382    |
| Q93IM2 | 274    |
| Q94AA6 | 3702   |
| Q94F14 | 3702   |
| Q94IA5 | 3708   |
| Q94IH7 | 3120   |
| Q94IH8 | 3120   |
| Q96YC6 | 111955 |
| Q977U6 | 2252   |
| Q977X9 | 90909  |
| Q97AN9 | 273116 |

|        |        |
|--------|--------|
| Q97AP0 | 273116 |
| Q97L29 | 1488   |
| Q97QB4 | 1313   |
| Q97WS2 | 2287   |
| Q97X22 | 2287   |
| Q97Y81 | 2287   |
| Q99VD0 | 158878 |
| Q9AGH6 | 28451  |
| Q9BSD0 | 9606   |
| Q9CPJ4 | 747    |
| Q9FES0 | 29760  |
| Q9GTK5 | 5833   |
| Q9HK32 | 2303   |
| Q9HKG4 | 2303   |
| Q9HQE1 | 2242   |
| Q9HRM7 | 2242   |
| Q9HSM4 | 2242   |
| Q9K5Z3 | 86665  |
| Q9K9D0 | 86665  |
| Q9KB34 | 86665  |
| Q9KCE9 | 86665  |
| Q9KEM8 | 86665  |
| Q9L0F9 | 1902   |
| Q9LEC8 | 4092   |
| Q9RTN9 | 1299   |
| Q9RVP5 | 1299   |
| Q9S7A0 | 3702   |
| Q9TVN3 | 47911  |
| Q9TXS8 | 5833   |
| Q9VCN3 | 7227   |
| Q9Y8I4 | 2277   |
| Q9YC65 | 56636  |
| Q9ZKD8 | 85963  |
| Q9ZRZ0 | 4686   |

**GDH1/3**

| <b>UniProt</b> | <b>TXID</b> |
|----------------|-------------|
| A0AG12         | 386043      |
| A0AQX1         | 1599        |
| A0K0R0         | 290399      |
| A0KIR1         | 380703      |
| A0M685         | 411154      |
| A0Q1V4         | 386415      |
| A0Q832         | 401614      |
| A0R3E3         | 246196      |
| A0RR57         | 360106      |
| A0YQX1         | 313612      |
| A0YYR7         | 313612      |
| A0ZB83         | 313624      |
| A0ZZA6         | 367928      |

|        |        |
|--------|--------|
| A1ABU2 | 405955 |
| A1APQ5 | 338966 |
| A1AUR9 | 338966 |
| A1B8U4 | 318586 |
| A1CGX0 | 5057   |
| A1CXW1 | 331117 |
| A1JSP8 | 393305 |
| A1KVB4 | 272831 |
| A1R9V9 | 290340 |
| A1RT74 | 384616 |
| A1RVI3 | 384616 |
| A1SH86 | 196162 |
| A1TEH7 | 350058 |
| A1TXD9 | 351348 |
| A1UL36 | 189918 |
| A1W4P2 | 232721 |
| A1WT43 | 349124 |
| A1ZR86 | 313606 |
| A2BL51 | 415426 |
| A2CA49 | 59922  |
| A2D8B4 | 5722   |
| A2DWI3 | 5722   |
| A2FCY9 | 5722   |
| A2G1Y8 | 5722   |
| A2QHT6 | 425011 |
| A2TF52 | 1307   |
| A2TF53 | 1307   |
| A2TQI4 | 313590 |
| A2TYE4 | 313598 |
| A3CKW9 | 388919 |
| A3DCD3 | 203119 |
| A3IFY6 | 388400 |
| A3IL52 | 391612 |
| A3J2Y4 | 391598 |
| A3J3F7 | 391598 |
| A3JK00 | 270374 |
| A3L3S9 | 350704 |
| A3LKH9 | 350703 |
| A3LS93 | 4924   |
| A3M3G4 | 400667 |
| A3MUY9 | 410359 |
| A3MWK6 | 410359 |
| A3MZE5 | 416269 |
| A3Q5I4 | 164757 |
| A3U5S5 | 216432 |
| A3WHR0 | 237727 |

|        |        |
|--------|--------|
| A3WLP4 | 314276 |
| A3XQE9 | 398720 |
| A3ZUB7 | 314230 |
| A4A3G4 | 314285 |
| A4AE18 | 314285 |
| A4APW2 | 313603 |
| A4BI48 | 314283 |
| A4BV92 | 314278 |
| A4BX97 | 313594 |
| A4CIM6 | 313596 |
| A4E704 | 411903 |
| A4ENJ3 | 391593 |
| A4FM84 | 405948 |
| A4G269 | 204773 |
| A4HGZ4 | 5660   |
| A4I426 | 5671   |
| A4IT39 | 420246 |
| A4IXJ1 | 418136 |
| A4KPQ5 | 412422 |
| A4MXA4 | 374927 |
| A4N597 | 375432 |
| A4NC90 | 375177 |
| A4NHF6 | 374928 |
| A4NM81 | 374932 |
| A4NTY9 | 374933 |
| A4NYZ3 | 375063 |
| A4QFE5 | 340322 |
| A4RGW8 | 148305 |
| A4SPC8 | 382245 |
| A4T6P7 | 350054 |
| A4TQX9 | 386656 |
| A4VI30 | 379731 |
| A4VSY1 | 391295 |
| A4VZ67 | 391296 |
| A4W9I4 | 399742 |
| A4WM05 | 340102 |
| A4WMJ4 | 340102 |
| A4XT69 | 399739 |
| A4ZYU8 | 562    |
| A5APE2 | 29760  |
| A5D6B0 | 370438 |
| A5DKU4 | 4929   |
| A5E4Q2 | 36914  |
| A5FM33 | 376686 |
| A5G5A5 | 351605 |
| A5G5J9 | 351605 |

|        |        |
|--------|--------|
| A5IFK8 | 400673 |
| A5ING2 | 390874 |
| A5K0U3 | 5855   |
| A5K164 | 5855   |
| A5KL31 | 411460 |
| A5LDP8 | 406556 |
| A5LN10 | 406557 |
| A5LVW0 | 406558 |
| A5M484 | 406559 |
| A5M7R4 | 406560 |
| A5MGJ7 | 406561 |
| A5MRJ7 | 406562 |
| A5MSW6 | 406563 |
| A5N1R2 | 431943 |
| A5P6Y6 | 161528 |
| A5UAW4 | 374930 |
| A5ULL5 | 420247 |
| A5UU09 | 357808 |
| A5V3C0 | 392499 |
| A5V5X9 | 392499 |
| A5VGL3 | 392499 |
| A5VNF6 | 444178 |
| A5VYB0 | 351746 |
| A5WEK2 | 349106 |
| A5Z9F7 | 411463 |
| A5ZLC7 | 411901 |
| A5ZLD5 | 411901 |
| A5ZR80 | 411459 |
| A6BKL3 | 411462 |
| A6BWR4 | 412420 |
| A6CBA5 | 344747 |
| A6DKS2 | 313628 |
| A6EQC4 | 50743  |
| A6GWB2 | 402612 |
| A6KX04 | 435590 |
| A6KX09 | 435590 |
| A6LIH4 | 435591 |
| A6LIH9 | 435591 |
| A6LJS6 | 391009 |
| A6NVM8 | 411467 |
| A6QBL6 | 387093 |
| A6R7P3 | 339724 |
| A6SLQ7 | 332648 |
| A6SXZ7 | 375286 |
| A6T7S2 | 272620 |
| A6USH6 | 406327 |

|        |        |
|--------|--------|
| A6VBX5 | 381754 |
| A6VLA6 | 339671 |
| A6VWJ0 | 400668 |
| A6WVM7 | 439375 |
| A6ZPK3 | 307796 |
| A7A0A7 | 307796 |
| A7A2X9 | 411481 |
| A7AJ97 | 411477 |
| A7AJB2 | 411477 |
| A7AS73 | 5865   |
| A7AYC2 | 411470 |
| A7B911 | 411466 |
| A7EUW2 | 665079 |
| A7FP04 | 349747 |
| A7GWG7 | 360105 |
| A7HEQ1 | 404589 |
| A7HLX9 | 381764 |
| A7I0A6 | 360107 |
| A7JB60 | 430557 |
| A7JJE2 | 430558 |
| A7JNJ5 | 442346 |
| A7JY81 | 150340 |
| A7LQM4 | 411476 |
| A7LSB5 | 411476 |
| A7N9W0 | 458234 |
| A7NKS4 | 383372 |
| A7RFX2 | 45351  |
| A7SE06 | 45351  |
| A7TKG3 | 436907 |
| A7V1Y1 | 411479 |
| A7V203 | 411479 |
| A7VHP8 | 411489 |
| A7VQT4 | 428125 |
| A7YRY8 | 430556 |
| A7ZB01 | 360104 |
| A7ZMNO | 331111 |
| A8A0V4 | 331112 |
| A8AHF5 | 290338 |
| A8BFF8 | 184922 |
| A8ERI8 | 367737 |
| A8F3U9 | 416591 |
| A8FIU2 | 315750 |
| A8GKZ5 | 399741 |
| A8GZW8 | 398579 |
| A8LTK4 | 398580 |
| A8MAL7 | 397948 |

|        |        |
|--------|--------|
| A8P5F5 | 240176 |
| A8RDE0 | 428127 |
| A8RQ20 | 411902 |
| A8S385 | 411902 |
| A8SAT6 | 411485 |
| A8SQ78 | 411474 |
| A8U8B8 | 333990 |
| A8UIQ6 | 391603 |
| A8YF61 | 267872 |
| A9A0F1 | 96561  |
| A9AZT9 | 316274 |
| A9BGN9 | 403833 |
| A9BJ14 | 403833 |
| A9BN74 | 398578 |
| A9DQI4 | 391587 |
| A9GCX2 | 448385 |
| A9H304 | 391595 |
| A9I0G0 | 340100 |
| A9KKP2 | 357809 |
| A9M1S9 | 374833 |
| A9M7R4 | 483179 |
| A9N282 | 272994 |
| A9NH73 | 441768 |
| A9R5J0 | 349746 |
| A9RG07 | 145481 |
| A9RTS6 | 145481 |
| A9RXU2 | 145481 |
| A9WCC4 | 324602 |
| A9WEM0 | 324602 |
| A9Z5Q1 | 373665 |
| B0A1H9 | 404214 |
| B0A793 | 445973 |
| B0A794 | 445973 |
| B0BTT0 | 434271 |
| B0CFT6 | 329726 |
| B0CJ82 | 470137 |
| B0G3F6 | 411461 |
| B0GH05 | 404218 |
| B0GU84 | 404217 |
| B0HAC4 | 404216 |
| B0HKL2 | 404215 |
| B0HTX0 | 360099 |
| B0JQI9 | 449447 |
| B0KME1 | 76869  |
| B0MHT7 | 411490 |
| B0MRS7 | 428128 |



|        |        |
|--------|--------|
| BOMVZ4 | 445970 |
| BON555 | 445974 |
| BONCN8 | 411468 |
| BONU92 | 449673 |
| BONUB9 | 449673 |
| BOP2A6 | 411484 |
| BOPDC5 | 445972 |
| BOR2S8 | 478009 |
| BOR537 | 478009 |
| BORZ86 | 59201  |
| BOTS30 | 458817 |
| BOTX73 | 484022 |
| BOUW88 | 228400 |
| BOV9Q6 | 509173 |
| BOVJV7 | 456827 |
| BOVSA6 | 509170 |
| BOY5K4 | 451804 |
| B1B9U1 | 445337 |
| B1BJJ0 | 445334 |
| B1BW10 | 451755 |
| B1C1G6 | 428126 |
| B1C5T8 | 445971 |
| B1ENR6 | 502347 |
| B1HV12 | 444177 |
| B1ICB8 | 487214 |
| B1IPG9 | 481805 |
| B1JF25 | 390235 |
| B1JHU9 | 502800 |
| B1L891 | 126740 |
| B1LDW9 | 439855 |
| B1MGD0 | 561007 |
| B1QXD1 | 447214 |
| B1R556 | 451754 |
| B1RGN1 | 451756 |
| B1RPY4 | 451757 |
| B1S3K0 | 453362 |
| B1S8L5 | 473819 |
| B1SCE7 | 471872 |
| B1V119 | 488537 |
| B1VG71 | 504474 |
| B1W2R9 | 455632 |
| B1WT18 | 43989  |
| B1XGM2 | 316385 |
| B1XI27 | 32049  |
| B1Y8Z9 | 444157 |
| B1ZVK9 | 452637 |

|        |        |
|--------|--------|
| B1ZWE8 | 452637 |
| B2B5X0 | 5145   |
| B2DRM3 | 453363 |
| B2DTN0 | 453364 |
| B2DY74 | 453365 |
| B2E593 | 453366 |
| B2EBY1 | 486409 |
| B2GH78 | 378753 |
| B2HVT4 | 405416 |
| B2IEJ1 | 395963 |
| B2IQA4 | 516950 |
| B2J2W4 | 63737  |
| B2K6K4 | 502801 |
| B2KCG1 | 445932 |
| B2N2M1 | 344610 |
| B2NS03 | 444451 |
| B2P625 | 444452 |
| B2PNK5 | 444453 |
| B2Q5S7 | 471874 |
| B2Q5T9 | 471874 |
| B2RKJ1 | 431947 |
| B2S8W5 | 430066 |
| B2SDV3 | 441952 |
| B2TLD1 | 508765 |
| B2U3E5 | 344609 |
| B2UP90 | 349741 |
| B2UUI0 | 512562 |
| B2V1W6 | 508767 |
| B2W0U7 | 426418 |
| B3AA50 | 478004 |
| B3ATA1 | 478005 |
| B3B351 | 478006 |
| B3BJS9 | 478008 |
| B3BY31 | 478007 |
| B3CIV7 | 471870 |
| B3CIY0 | 471870 |
| B3DP13 | 205913 |
| B3DXA7 | 481448 |
| B3E388 | 398767 |
| B3H0U1 | 537457 |
| B3HJ16 | 340184 |
| B3HR05 | 340197 |
| B3IB67 | 340185 |
| B3IJU9 | 340186 |
| B3JKL2 | 470145 |
| B3JKM7 | 470145 |

|        |        |
|--------|--------|
| B3LA84 | 5851   |
| B3LAJ5 | 5851   |
| B3LK29 | 285006 |
| B3LUZ4 | 285006 |
| B3PIL2 | 498211 |
| B3RBG0 | 164546 |
| B3W6Y4 | 543734 |
| B3WNY1 | 344601 |
| B3X2B4 | 358708 |
| B3XG27 | 358709 |
| B3YKI7 | 439842 |
| B4A127 | 454168 |
| B4AJQ9 | 536229 |
| B4APU8 | 545422 |
| B4B6W9 | 497965 |
| B4BQY6 | 495036 |
| B4D5I8 | 497964 |
| B4F018 | 529507 |
| B4R8T2 | 450851 |
| B4RN81 | 521006 |
| B4RV54 | 314275 |
| B4RXA2 | 314275 |
| B4S8U0 | 290512 |
| B4T3Y9 | 423368 |
| B4TGD6 | 454169 |
| B4TUB6 | 439843 |
| B4U375 | 552526 |
| B4UL58 | 447217 |
| B4V7F3 | 465541 |
| B4VK35 | 118168 |
| B4WTC6 | 91464  |
| B4WX92 | 236097 |
| B5ATN7 | 1307   |
| B5BA76 | 554290 |
| B5BZB3 | 439846 |
| B5CIL9 | 454165 |
| B5CM20 | 471875 |
| B5CYJ2 | 484018 |
| B5CYL1 | 484018 |
| B5E539 | 512566 |
| B5E987 | 404380 |
| B5F852 | 454166 |
| B5FJE2 | 439851 |
| B5GKV5 | 465543 |
| B5ICF2 | 439481 |
| B5JE84 | 382464 |

|        |        |
|--------|--------|
| B5JF32 | 382464 |
| B5MQ26 | 439847 |
| B5MZL9 | 440534 |
| B5NAD5 | 454167 |
| B5NU80 | 454231 |
| B5P7Y8 | 454164 |
| B5PKB9 | 465518 |
| B5PZA5 | 465516 |
| B5QDE1 | 465517 |
| B5QJG0 | 486408 |
| B5QT82 | 1582   |
| B5QWJ4 | 550537 |
| B5VDG0 | 545124 |
| B5W8D8 | 513049 |
| B5XS60 | 507522 |
| B5YQ50 | 444450 |
| B5Z871 | 563041 |
| B6BG40 | 439496 |
| B6BKM6 | 439483 |
| B6BZE1 | 473788 |
| B6FJG4 | 500632 |
| B6GCU1 | 445975 |
| B6HSV9 | 500485 |
| B6IBI2 | 409438 |
| B6JIA2 | 504832 |
| B6JMR5 | 570508 |
| B6K3S5 | 402676 |
| B6KQJ7 | 508771 |
| B6Q267 | 441960 |
| B6V7E4 | 5061   |
| B6VS76 | 483217 |
| B6VSG6 | 483217 |
| B6WSB9 | 411464 |
| B6XAW7 | 520999 |
| B6XSI8 | 566552 |
| B7A1X9 | 502346 |
| B7AD89 | 483216 |
| B7ADB1 | 483216 |
| B7AWD8 | 483218 |
| B7BDK4 | 537006 |
| B7BDL4 | 537006 |
| B7C7D7 | 518637 |
| B7G3X3 | 556484 |
| B7GSG9 | 391904 |
| B7GXT1 | 557600 |
| B7I8U8 | 480119 |

|        |        |
|--------|--------|
| B7IG24 | 484019 |
| B7JYG4 | 41431  |
| B7K9R8 | 65393  |
| B7L300 | 440085 |
| B7L6N4 | 585055 |
| B7LQ31 | 585054 |
| B7M1H3 | 585034 |
| B7MAX1 | 585035 |
| B7MVN9 | 585397 |
| B7N596 | 585056 |
| B7NT17 | 585057 |
| B7RCI9 | 443254 |
| B7U3Y2 | 1307   |
| B7USE2 | 574521 |
| B7V0D1 | 557722 |
| B7WR10 | 399795 |
| B8AA37 | 39946  |
| B8DA65 | 552536 |
| B8DV15 | 442563 |
| B8G0B1 | 272564 |
| B8G4T1 | 326427 |
| B8G8N4 | 326427 |
| B8H6K7 | 452863 |
| B8HN81 | 395961 |
| B8I5M4 | 394503 |
| B8IGL7 | 460265 |
| B8IZX9 | 525146 |
| B8JGR7 | 455488 |
| B8KKZ0 | 566466 |
| B8KWA2 | 565045 |
| B8LUC1 | 441959 |
| B8NA36 | 332952 |
| B8Y4H6 | 1894   |
| B8ZK25 | 561276 |
| B9AEN0 | 483214 |
| B9CKM5 | 553184 |
| B9CX16 | 591023 |
| B9DRY4 | 218495 |
| B9E5H1 | 583346 |
| B9K9V6 | 309803 |
| B9KDG9 | 306263 |
| B9KZK6 | 309801 |
| B9LED0 | 480224 |
| B9LH26 | 480224 |
| B9LUS4 | 416348 |
| B9LZJ9 | 316067 |

|        |        |
|--------|--------|
| B9MEN4 | 535289 |
| B9MHY9 | 535289 |
| B9N1A0 | 3694   |
| B9PY05 | 5811   |
| B9QLJ6 | 432359 |
| B9QUN2 | 244592 |
| B9RQ63 | 3988   |
| B9WGQ6 | 573826 |
| B9WPP9 | 2252   |
| B9WW23 | 286604 |
| B9XLJ6 | 320771 |
| B9XW63 | 544405 |
| B9XZU7 | 544406 |
| B9Y2T7 | 545696 |
| COA9E2 | 278957 |
| COATZ7 | 471881 |
| COATZ8 | 471881 |
| COBB24 | 470146 |
| COBIH7 | 487796 |
| COBLL5 | 487797 |
| COBUC3 | 547043 |
| COBX65 | 553973 |
| COCS54 | 476272 |
| COCTM3 | 518636 |
| COE4U7 | 566549 |
| COE9U2 | 537013 |
| COENR2 | 546264 |
| COENR3 | 546264 |
| COETW9 | 411469 |
| COFPZ9 | 622312 |
| COG3Z3 | 595497 |
| COM727 | 553482 |
| COMEK1 | 553483 |
| CON2Z5 | 637616 |
| CONIM4 | 447093 |
| COQ6Y4 | 476213 |
| COQGH3 | 177437 |
| COQWK1 | 565034 |
| CORGS5 | 546272 |
| COS9G7 | 482561 |
| COVV97 | 548477 |
| COW243 | 525245 |
| COW5L5 | 525246 |
| COWKF5 | 525260 |
| COX578 | 491074 |
| COXIV4 | 525327 |

|        |        |
|--------|--------|
| C0XS81 | 525263 |
| C0YUW1 | 525257 |
| C1A1R9 | 234621 |
| C1AVT4 | 632772 |
| C1C7T1 | 488221 |
| C1CEQ8 | 488222 |
| C1CL37 | 488223 |
| C1CR03 | 487213 |
| C1D8T0 | 557598 |
| C1GBZ4 | 502780 |
| C1HAN5 | 502779 |
| C1HLD1 | 469598 |
| C1HYU7 | 528345 |
| C1I8B3 | 457396 |
| C1M3R4 | 469595 |
| C1V8W8 | 469382 |
| C1V8W9 | 469382 |
| C2BNQ5 | 525264 |
| C2BYG3 | 525367 |
| C2CNP2 | 525268 |
| C2CYM6 | 525310 |
| C2D848 | 525256 |
| C2DD07 | 525278 |
| C2DQA1 | 525281 |
| C2EDD3 | 525362 |
| C2EJJ3 | 525364 |
| C2FDD8 | 525337 |
| C2FKR1 | 525338 |
| C2FVZ9 | 525372 |
| C2GKR8 | 548478 |
| C2GY27 | 548480 |
| C2H567 | 525271 |
| C2HC73 | 525279 |
| C2JJR6 | 491075 |
| C2K157 | 525361 |
| C2KTF9 | 585199 |
| C2LOW2 | 585501 |
| C2LEJ3 | 525369 |
| C2LTS1 | 596322 |
| C2M4R2 | 553178 |
| C2M4S2 | 553178 |
| C2ME01 | 596327 |
| C3J8J3 | 553175 |
| C3JU89 | 596309 |
| C3K2C9 | 216595 |
| C3KKH2 | 394    |

|        |        |
|--------|--------|
| C3PH96 | 548476 |
| C3Q3H0 | 457395 |
| C3Q3H5 | 457395 |
| C3QI46 | 556258 |
| C3QI53 | 556258 |
| C3QX18 | 469590 |
| C3QX38 | 469590 |
| C3RBL6 | 556260 |
| C3RBM1 | 556260 |
| C3RKH6 | 556270 |
| C3T742 | 562    |
| C3WAP6 | 469616 |
| C3X4W9 | 556268 |
| C3XB31 | 556269 |
| C3XFD4 | 613026 |
| C3XJS4 | 556267 |
| C4F1M2 | 521005 |
| C4F5W7 | 521004 |
| C4F820 | 521003 |
| C4FD46 | 518635 |
| C4G6Y9 | 592010 |
| C4GAE3 | 626523 |
| C4GF98 | 629741 |
| C4GYZ8 | 547047 |
| C4HFN0 | 547046 |
| C4IDT1 | 632245 |
| C4IN97 | 641140 |
| C4JAW3 | 4577   |
| C4JW59 | 336963 |
| C4LHR0 | 645127 |
| C4QW46 | 644223 |
| C4S086 | 349968 |
| C4SC10 | 349967 |
| C4SLU2 | 349966 |
| C4T263 | 349965 |
| C4TR58 | 527012 |
| C4U520 | 527002 |
| C4UN23 | 527005 |
| C4UUT2 | 527004 |
| C4V2L2 | 638302 |
| C4VE20 | 553209 |
| C4WH45 | 641118 |
| C4X724 | 484021 |
| C4Y7X8 | 306902 |
| C4YGN3 | 5476   |
| C4Z318 | 515620 |



|        |        |
|--------|--------|
| C4Z8N8 | 515619 |
| C4ZIU4 | 85643  |
| C4ZZB7 | 595496 |
| C5BB17 | 634503 |
| C5BWF2 | 471853 |
| C5C933 | 465515 |
| C5D7D8 | 471223 |
| C5DFW7 | 559295 |
| C5DSI5 | 559307 |
| C5E973 | 537937 |
| C5ER19 | 457421 |
| C5EXX2 | 537972 |
| C5F9Y0 | 537973 |
| C5FF36 | 554155 |
| C5G895 | 559297 |
| C5JPP3 | 559298 |
| C5MCT4 | 294747 |
| C5P8S8 | 222929 |
| C5PTG7 | 525373 |
| C5RB90 | 585506 |
| C5RID0 | 573061 |
| C5S0Z7 | 637911 |
| C5S0Z8 | 637911 |
| C5TA65 | 573060 |
| C5TKE9 | 596320 |
| C5UPY2 | 536233 |
| C5VD14 | 553207 |
| C5VK09 | 553174 |
| C5VLX4 | 553174 |
| C5VRL1 | 592027 |
| C5VYI0 | 218494 |
| C5W4T4 | 511693 |
| C5WG08 | 486410 |
| C5XN30 | 4558   |
| C5ZXL8 | 537970 |
| C6A5L0 | 580050 |
| C6AG68 | 555970 |
| C6AJR8 | 634176 |
| C6BS98 | 526222 |
| C6CXF6 | 324057 |
| C6DJB5 | 561230 |
| C6E8X1 | 443144 |
| C6ECJ6 | 469008 |
| C6EVR5 | 5421   |
| C6GQT9 | 568813 |
| C6GUU4 | 568814 |

|        |        |
|--------|--------|
| C6H7Z4 | 544712 |
| C6I9Z8 | 457392 |
| C6IA26 | 457392 |
| C6IME1 | 469586 |
| C6IMJ7 | 469586 |
| C6IXQ9 | 621372 |
| C6J7W9 | 457412 |
| C6LMB6 | 478749 |
| C6M0A8 | 598745 |
| C6M581 | 547045 |
| C6MB43 | 153948 |
| C6MNF5 | 443143 |
| C6N0S9 | 658187 |
| C6N5E8 | 658187 |
| C6P885 | 580327 |
| C6PTN9 | 536227 |
| C6QID7 | 582899 |
| C6RAQ4 | 553206 |
| C6RHN9 | 553219 |
| C6RMH6 | 596318 |
| C6S8E8 | 662598 |
| C6SBQ2 | 663926 |
| C6SL48 | 295996 |
| C6SQZ5 | 511691 |
| C6UJ75 | 413997 |
| C6UX17 | 544404 |
| C6VNY5 | 644042 |
| C6VYT1 | 471854 |
| C6WZG7 | 531844 |
| C6XS85 | 485917 |
| C6YTX8 | 539329 |
| C6Z9F0 | 457394 |
| C6Z9F5 | 457394 |
| C7BU49 | 553480 |
| C7BXF1 | 592205 |
| C7CFH7 | 661410 |
| C7CT29 | 565636 |
| C7D3S6 | 565637 |
| C7G5J4 | 536231 |
| C7GPH9 | 574961 |
| C7GUL4 | 574961 |
| C7GZY3 | 592031 |
| C7H7A0 | 411483 |
| C7HHQ3 | 572545 |
| C7IDC0 | 588581 |
| C7LFT0 | 568815 |

|        |        |
|--------|--------|
| C7LQK9 | 525897 |
| C7M8B3 | 521097 |
| C7MAV2 | 446465 |
| C7MNC8 | 469378 |
| C7MZK2 | 471857 |
| C7N599 | 471855 |
| C7NHY3 | 478801 |
| C7P570 | 485914 |
| C7QXG9 | 395962 |
| C7R2K2 | 471856 |
| C7R731 | 523791 |
| C7TA59 | 568703 |
| C7TGU1 | 568704 |
| C7U7K5 | 565638 |
| C7UGI0 | 565642 |
| C7UP10 | 565641 |
| C7UV78 | 565650 |
| C7V5G4 | 565640 |
| C7VCG4 | 565644 |
| C7VNK8 | 565646 |
| C7VW65 | 565649 |
| C7W2T1 | 565647 |
| C7W9W7 | 565648 |
| C7WKH6 | 565643 |
| C7WNY5 | 565651 |
| C7X246 | 565645 |
| C7X6E0 | 563193 |
| C7X6E5 | 563193 |
| C7YAS1 | 565639 |
| C7YTV6 | 660122 |
| C8JVB1 | 393124 |
| C8K3J9 | 393125 |
| C8K7X8 | 393128 |
| C8N8B6 | 638300 |
| C8NPT9 | 196164 |
| C8NTT8 | 585529 |
| C8PF63 | 553220 |
| C8PZ35 | 553217 |
| C8RTU9 | 525262 |
| C8T6I9 | 667127 |
| C8TSS7 | 573235 |
| C8UA24 | 585395 |
| C8UBL5 | 585396 |
| C8V8W7 | 227321 |
| C8WAA2 | 521095 |
| C8WI25 | 479437 |

|        |        |
|--------|--------|
| C8Z3M7 | 643680 |
| C8ZHC3 | 643680 |
| C9A1D2 | 565653 |
| C9ACQ0 | 565655 |
| C9ADJ6 | 565662 |
| C9AMB6 | 565663 |
| C9B0M9 | 565652 |
| C9B4P5 | 565658 |
| C9BEH6 | 565659 |
| C9BQJ0 | 565657 |
| C9BZD6 | 565661 |
| C9C7M6 | 565660 |
| C9CAF1 | 565656 |
| C9CNZ8 | 565654 |
| C9KN37 | 500635 |
| C9KV79 | 483215 |
| C9KV88 | 483215 |
| C9LB68 | 537007 |
| C9LHG2 | 626522 |
| C9LXX3 | 546271 |
| C9MCJ1 | 656913 |
| C9MIH4 | 656912 |
| C9MRD2 | 649761 |
| C9NDK4 | 591167 |
| C9P7J4 | 675813 |
| C9PLW8 | 675811 |
| C9PN71 | 667128 |
| C9PVK5 | 619693 |
| C9QTU7 | 536056 |
| C9R6N5 | 668336 |
| C9RNS6 | 59374  |
| C9T509 | 520459 |
| C9TED0 | 520460 |
| C9TMR2 | 520463 |
| C9TT50 | 520461 |
| C9U7G1 | 520454 |
| C9UGN5 | 520452 |
| C9UQX5 | 520451 |
| C9UVW3 | 520450 |
| C9V8A3 | 520456 |
| C9VL93 | 520457 |
| C9VVX2 | 520455 |
| C9WY24 | 604162 |
| C9XFX9 | 568708 |
| D0ADQ1 | 565666 |
| D0ALR7 | 565664 |

|        |        |
|--------|--------|
| DOAZH6 | 575591 |
| DOB4S8 | 224914 |
| DOBDB8 | 520488 |
| DOCOM9 | 575564 |
| DOC906 | 575584 |
| DOGHIO | 520465 |
| DOGUP7 | 675806 |
| DOHHK9 | 675820 |
| DOITD0 | 290847 |
| DOJ1V2 | 688245 |
| DOJK87 | 637382 |
| DOJUB8 | 637385 |
| DOKOF2 | 684950 |
| DOKE64 | 561231 |
| DOL7K3 | 526226 |
| DOLGK4 | 502025 |
| DOPAQ5 | 520489 |
| DOPNE2 | 520487 |
| DORLL9 | 437701 |
| DORSL1 | 469609 |
| DOS072 | 575585 |
| DOSAL3 | 575586 |
| DOSMD0 | 575587 |
| DOSUU2 | 575588 |
| DOT4P8 | 575589 |
| DOTCW4 | 469589 |
| DOTCW9 | 469589 |
| DOTR30 | 469588 |
| DOTR38 | 469588 |
| DOW527 | 546262 |
| DOW6E5 | 546265 |
| DOWEM6 | 649764 |
| DOWLT4 | 649743 |
| DOWS85 | 674977 |
| DOYPN7 | 596328 |
| DOZGL3 | 498217 |
| DOZW30 | 588858 |
| D1A2H6 | 471852 |
| D1AKZ0 | 526218 |
| D1B531 | 525898 |
| D1BEM5 | 446469 |
| D1BVJ5 | 446471 |
| D1C4B5 | 479434 |
| D1CFL6 | 525904 |
| D1CVG1 | 520449 |
| D1D6W1 | 528346 |

|        |        |
|--------|--------|
| D1DA26 | 528352 |
| D1DGC3 | 528354 |
| D1DQN2 | 528356 |
| D1DXB4 | 528355 |
| D1E3Z9 | 528358 |
| D1EA59 | 528359 |
| D1EGY9 | 528360 |
| D1EQ98 | 520462 |
| D1F1J5 | 520464 |
| D1F6I8 | 520466 |
| D1FHQ5 | 520458 |
| D1JAA5 | 115547 |
| D1JUC7 | 469587 |
| D1JUF1 | 469587 |
| D1K6K4 | 457391 |
| D1K6L0 | 457391 |
| D1NBA2 | 340101 |
| D1NLN9 | 492476 |
| D1NWC2 | 561180 |
| D1POC7 | 500637 |
| D1PC66 | 537011 |
| D1PIU8 | 411471 |
| D1PUP4 | 585502 |
| D1PVJ6 | 585502 |
| D1Q465 | 545431 |
| D1QQK2 | 649760 |
| D1RYM0 | 682634 |
| D1SE87 | 644283 |
| D1TVF9 | 687916 |
| D1VYL3 | 679189 |
| D1W6L1 | 679190 |
| D1WTX5 | 649189 |
| D1XQ85 | 647653 |
| D1XVC1 | 553171 |
| D1YDA3 | 679194 |
| D1ZT36 | 5147   |
| D2AFF8 | 591020 |
| D2ALP0 | 510831 |
| D2BFC1 | 479432 |
| D2C507 | 590168 |
| D2EQG4 | 563037 |
| D2EZH8 | 585543 |
| D2EZM0 | 585543 |
| D2KKK9 | 1307   |
| D2KKL0 | 1307   |
| D2KKL1 | 1307   |

|        |        |
|--------|--------|
| D2LZH8 | 649639 |
| D2MN04 | 679192 |
| D2NJ38 | 431946 |
| D2NY56 | 653938 |
| D2PA11 | 637381 |
| D2Q6I5 | 401473 |
| D2R268 | 530564 |
| D2RXF9 | 543526 |
| D2RY65 | 543526 |
| D2RZ42 | 543526 |
| D2RZC6 | 543526 |
| D2S0I1 | 543526 |
| D2SGC4 | 526225 |
| D2TUK6 | 637910 |
| D2U087 | 638    |
| D2YJ06 | 671074 |
| D2YQC3 | 671076 |
| D2ZB99 | 500639 |
| D2ZPY7 | 521002 |
| D2ZZV4 | 546266 |
| D3A3C1 | 546268 |
| D3AI09 | 566550 |
| D3C045 | 653733 |
| D3CE47 | 648999 |
| D3DZ61 | 634498 |
| D3EDK3 | 481743 |
| D3FWN6 | 398511 |
| D3GVH4 | 216592 |
| D3H869 | 365659 |
| D3HE25 | 637909 |
| D3HXZ4 | 575611 |
| D3I165 | 575611 |
| D3I787 | 575612 |
| D3I8X6 | 575612 |
| D3IAQ1 | 575614 |
| D3IEB0 | 575614 |
| D3IK01 | 575615 |
| D3KL75 | 393121 |
| D3LG75 | 565665 |
| D3LKL2 | 596312 |
| D3LW10 | 699218 |
| D3MGM7 | 679195 |
| D3MP04 | 686659 |
| D3QUV4 | 701177 |
| D3R7E3 | 552531 |
| D3RJ65 | 640131 |

|        |        |
|--------|--------|
| D3SX02 | 547559 |
| D3T0V9 | 547559 |
| D3T144 | 547559 |
| D3TA98 | 439481 |
| D3UGI7 | 679897 |
| D3USF6 | 683837 |
| D3UY64 | 406818 |
| D3VF16 | 406817 |
| D4B2H4 | 663331 |
| D4BAI2 | 500640 |
| D4BLG5 | 518634 |
| D4C241 | 521000 |
| D4CDT0 | 411486 |
| D4CKH1 | 608534 |
| D4DLM1 | 663202 |
| D4DN64 | 546263 |
| D4DYU0 | 667129 |
| D4ED00 | 694569 |
| D4EPZ4 | 699185 |
| D4ERV7 | 699186 |
| D4FAH4 | 500638 |
| D4FTM1 | 655813 |
| D4G8V5 | 515618 |
| D4GPR3 | 309800 |
| D4GY63 | 309800 |
| D4GY69 | 309800 |
| D4H2E9 | 522772 |
| D4HFC6 | 553199 |
| D4INE4 | 717959 |
| D4IQD3 | 717959 |
| D4J2B6 | 657324 |
| D4J437 | 717962 |
| D4JCV2 | 717960 |
| D4JI76 | 657317 |
| D4JS51 | 657319 |
| D4JZ94 | 718252 |
| D4KBX4 | 657322 |
| D4KF87 | 657316 |
| D4KKW8 | 657315 |
| D4L424 | 718255 |
| D4L843 | 657321 |
| D4LFA8 | 213810 |
| D4LPM4 | 657323 |
| D4LSA1 | 657314 |
| D4M5L5 | 657313 |
| D4MB72 | 657310 |



|        |        |
|--------|--------|
| D4MKI4 | 717961 |
| D4MXD7 | 245018 |
| D4PIU4 | 393117 |
| D4PR78 | 393131 |
| D4Q3R2 | 401650 |
| D4QHVO | 529885 |
| D4QQR5 | 535205 |
| D4R228 | 535206 |
| D4R6G3 | 544875 |
| D4RLZ6 | 546340 |
| D4RMW1 | 547468 |
| D4S0B6 | 511680 |
| D4S8A3 | 585503 |
| D4SAK9 | 585531 |
| D4SLZ9 | 645663 |
| D4TWN4 | 649742 |
| D4UMW4 | 246199 |
| D4UN78 | 246199 |
| D4UYQ9 | 791166 |
| D4VC17 | 702446 |
| D4VC22 | 702446 |
| D4VQU5 | 702447 |
| D4VQV2 | 702447 |
| D4VVZ9 | 791161 |
| D4WGG5 | 702443 |
| D4WGH6 | 702443 |
| D4X2R5 | 702444 |
| D4X2S2 | 702444 |
| D4X4P0 | 742159 |
| D4XP09 | 707232 |
| D4YH29 | 655812 |
| D4YQB5 | 585530 |
| D4ZR61 | 696747 |
| D5AFS8 | 423211 |
| D5B872 | 637386 |
| D5BCK8 | 655815 |
| D5BVC3 | 472759 |
| D5CCV4 | 716541 |
| D5D411 | 714962 |
| D5DDK5 | 592022 |
| D5E439 | 545693 |
| D5ESC7 | 264731 |
| D5EUQ2 | 264731 |
| D5G4A5 | 39416  |
| D5HDH9 | 751585 |
| D5MHU6 | 671143 |

|        |        |
|--------|--------|
| D5NU55 | 649754 |
| D5PPW1 | 525370 |
| D5QPZ9 | 595536 |
| D5R8K4 | 642492 |
| D5S619 | 760570 |
| D5TES2 | 573236 |
| D5U7Q3 | 526224 |
| D5UKD3 | 446466 |
| D5VAL1 | 749219 |
| D6A4N4 | 566461 |
| D6AI30 | 457431 |
| D6B9J6 | 457425 |
| D6CW74 | 657309 |
| D6CW84 | 657309 |
| D6DAY9 | 722911 |
| D6DGX1 | 717608 |
| D6DTW7 | 718254 |
| D6E321 | 657318 |
| D6E6Z1 | 657308 |
| D6EE73 | 457428 |
| D6GN49 | 469608 |
| D6H6N1 | 528348 |
| D6HL81 | 552396 |
| D6HXP2 | 550672 |
| D6IB74 | 550676 |
| D6IQP0 | 656380 |
| D6JA48 | 550677 |
| D6JKW7 | 528351 |
| D6JRN2 | 575565 |
| D6KBG9 | 645465 |
| D6KTP9 | 641146 |
| D6L4N0 | 641144 |
| D6LLF8 | 520448 |
| D6UKB7 | 585535 |
| D6V8X3 | 666684 |
| D6VEJ3 | 596153 |
| D6VPF7 | 559292 |
| D6W368 | 559292 |
| D6X9Z0 | 457429 |
| D6XQU5 | 637913 |
| D6XUQ4 | 439292 |
| D6Y2I7 | 469371 |
| D6Z5V7 | 589865 |
| D6ZKH1 | 548479 |
| D6ZS37 | 525381 |
| D6ZX62 | 759350 |

|        |        |
|--------|--------|
| D7AI85 | 663917 |
| D7B798 | 446468 |
| D7BM14 | 644284 |
| D7BUM8 | 749414 |
| D7C6S8 | 749414 |
| D7CNN7 | 643648 |
| D7E021 | 551115 |
| D7FCS9 | 693745 |
| D7GFF9 | 754252 |
| D7H1D6 | 520453 |
| D7IC11 | 469585 |
| D7IC14 | 469585 |
| D7IN59 | 469592 |
| D7IN64 | 469592 |
| D7IY50 | 585544 |
| D7IY62 | 585544 |
| D7JGE2 | 575590 |
| D7JR10 | 656379 |
| D7K6C0 | 457390 |
| D7K6D0 | 457390 |
| D7KHV1 | 81972  |
| D7N3R1 | 641149 |
| D7NA33 | 563008 |
| O60995 | 5693   |
| O60996 | 5693   |
| O61083 | 5693   |
| O87403 | 1402   |
| O93934 | 40559  |
| O96940 | 5833   |
| P00369 | 5141   |
| P07262 | 4932   |
| P0C934 | 837    |
| P14657 | 2725   |
| P18819 | 162425 |
| P24295 | 1512   |
| P28724 | 5741   |
| P28998 | 3076   |
| P29051 | 2242   |
| P29507 | 27300  |
| P31026 | 1718   |
| P39708 | 4932   |
| P43793 | 727    |
| P54386 | 1148   |
| P54387 | 5341   |
| P54388 | 486041 |
| P55990 | 210    |

|        |        |
|--------|--------|
| P78804 | 4896   |
| P94316 | 817    |
| P94598 | 818    |
| P95544 | 839    |
| P96110 | 2336   |
| Q02D11 | 234267 |
| Q02G89 | 208963 |
| Q03M22 | 322159 |
| Q04K22 | 373153 |
| Q0A6S2 | 187272 |
| Q0AIP4 | 335283 |
| Q0BNP9 | 393011 |
| Q0CL71 | 341663 |
| Q0I4P4 | 205914 |
| Q0JZU7 | 381666 |
| Q0SGW0 | 101510 |
| Q0SST9 | 289380 |
| Q0T4W7 | 373384 |
| Q0TH69 | 362663 |
| Q0TQ84 | 195103 |
| Q0USN4 | 13684  |
| Q0USN5 | 13684  |
| Q0VMQ0 | 393595 |
| Q0VMQ1 | 393595 |
| Q0W981 | 5127   |
| Q0WA46 | 632    |
| Q10WR8 | 203124 |
| Q14J69 | 393115 |
| Q15Z70 | 342610 |
| Q166S7 | 375451 |
| Q17YH3 | 382638 |
| Q18J04 | 362976 |
| Q1B412 | 164756 |
| Q1C1B1 | 360102 |
| Q1CDI3 | 377628 |
| Q1CSJ3 | 357544 |
| Q1GPE6 | 117207 |
| Q1H1T3 | 265072 |
| Q1IF28 | 384676 |
| Q1IT55 | 204669 |
| Q1JT17 | 383379 |
| Q1K016 | 281689 |
| Q1KYN6 | 222440 |
| Q1LD03 | 266264 |
| Q1N3D2 | 207949 |
| Q1NJF0 | 262489 |

|        |        |
|--------|--------|
| Q1NW86 | 262489 |
| Q1Q9E1 | 335284 |
| Q1QPK1 | 323097 |
| Q1RB31 | 364106 |
| Q1VBD1 | 314288 |
| Q1VY22 | 313595 |
| Q1WSM5 | 362948 |
| Q24MK0 | 138119 |
| Q26GG7 | 156586 |
| Q2A5D8 | 376619 |
| Q2G8V7 | 279238 |
| Q2GWE1 | 38033  |
| Q2IDY1 | 290397 |
| Q2KU68 | 360910 |
| Q2LC62 | 5551   |
| Q2LQG2 | 56780  |
| Q2NBY5 | 314225 |
| Q2NEG6 | 339860 |
| Q2UG98 | 5062   |
| Q2Y685 | 323848 |
| Q2YP74 | 359391 |
| Q30QE4 | 326298 |
| Q31EJ5 | 317025 |
| Q321Q3 | 300268 |
| Q32GA3 | 300267 |
| Q39WF1 | 269799 |
| Q3A571 | 338963 |
| Q3D0Y7 | 342615 |
| Q3D6F6 | 342616 |
| Q3DFQ8 | 342617 |
| Q3DJH6 | 342614 |
| Q3DQR9 | 342613 |
| Q3IL85 | 326442 |
| Q3ILZ7 | 348780 |
| Q3IS94 | 348780 |
| Q3ISK4 | 348780 |
| Q3JCR9 | 323261 |
| Q3K6J3 | 205922 |
| Q3M5M1 | 240292 |
| Q3MDV8 | 240292 |
| Q3XZ31 | 333849 |
| Q3Z2A7 | 300269 |
| Q46UV2 | 264198 |
| Q47Q60 | 269800 |
| Q49JG7 | 58096  |
| Q4C653 | 165597 |

|        |        |
|--------|--------|
| Q4D5C2 | 5693   |
| Q4DWV8 | 5693   |
| Q4EID3 | 267410 |
| Q4EWW3 | 267409 |
| Q4FR40 | 259536 |
| Q4JV01 | 306537 |
| Q4K5S2 | 220664 |
| Q4KTJ5 | 1358   |
| Q4PAR2 | 5270   |
| Q4Q7X1 | 5664   |
| Q4QP01 | 281310 |
| Q4WNQ8 | 5085   |
| Q4X2W2 | 5825   |
| Q57FF3 | 235    |
| Q57PY4 | 28901  |
| Q59KP4 | 5476   |
| Q5F731 | 242231 |
| Q5JKR7 | 39947  |
| Q5KL32 | 5207   |
| Q5L9U9 | 272559 |
| Q5L9X6 | 272559 |
| Q5M148 | 299768 |
| Q5M5N6 | 264199 |
| Q5NHR7 | 119856 |
| Q5P0F8 | 76114  |
| Q5QVZ2 | 135577 |
| Q5V3Y8 | 2238   |
| Q5V4X6 | 2238   |
| Q5V6I7 | 2238   |
| Q5WCI5 | 66692  |
| Q5X2P3 | 297246 |
| Q5YQU8 | 37329  |
| Q60A41 | 414    |
| Q64BT4 | 285389 |
| Q64CH4 | 286719 |
| Q64CM6 | 286721 |
| Q64Q81 | 817    |
| Q65C63 | 230603 |
| Q65C64 | 55189  |
| Q65C65 | 27292  |
| Q65C67 | 4931   |
| Q65GI2 | 279010 |
| Q65W57 | 221988 |
| Q664F6 | 633    |
| Q6A7K5 | 1747   |
| Q6AF05 | 59736  |

|        |        |
|--------|--------|
| Q6AJB1 | 84980  |
| Q6ANZ7 | 84980  |
| Q6BTN2 | 4959   |
| Q6C1A9 | 4952   |
| Q6CLT3 | 28985  |
| Q6DB50 | 29471  |
| Q6FD67 | 62977  |
| Q6FWH3 | 5478   |
| Q6KZF2 | 263820 |
| Q6MPX2 | 959    |
| Q6NGH0 | 1717   |
| Q6SI43 | 257382 |
| Q722Z0 | 265669 |
| Q74DL1 | 35554  |
| Q7M823 | 844    |
| Q7NA25 | 141679 |
| Q7NLJ0 | 33072  |
| Q7RGT5 | 73239  |
| Q7RQ39 | 73239  |
| Q7V7V9 | 74547  |
| Q7VGS9 | 32025  |
| Q7VSN6 | 520    |
| Q7WEU7 | 518    |
| Q7XXT6 | 2788   |
| Q82U80 | 915    |
| Q835G2 | 1351   |
| Q83RH0 | 623    |
| Q84WI8 | 3702   |
| Q88Q23 | 160488 |
| Q88XM9 | 1590   |
| Q8A6B2 | 818    |
| Q8CZK9 | 632    |
| Q8DPG0 | 171101 |
| Q8DUL2 | 1309   |
| Q8FGY8 | 217992 |
| Q8G2T7 | 29461  |
| Q8G6L0 | 216816 |
| Q8GE72 | 1265   |
| Q8ILF7 | 36329  |
| Q8ILT0 | 36329  |
| Q8PZY2 | 2209   |
| Q8RQP4 | 152794 |
| Q8TFF6 | 4931   |
| Q8TL71 | 2214   |
| Q8XK85 | 1502   |
| Q8Y9G8 | 1639   |

|        |        |
|--------|--------|
| Q8YF04 | 29459  |
| Q8YPE2 | 103690 |
| Q8ZT48 | 13773  |
| Q8ZW33 | 13773  |
| Q92E91 | 1642   |
| Q930S3 | 382    |
| Q96UJ9 | 76867  |
| Q96VJ7 | 5127   |
| Q977U6 | 2252   |
| Q97AN9 | 273116 |
| Q97L29 | 1488   |
| Q97QB4 | 1313   |
| Q9AGH6 | 28451  |
| Q9AIW1 | 1307   |
| Q9C8I0 | 3702   |
| Q9CPJ4 | 747    |
| Q9GTK5 | 5833   |
| Q9HFR6 | 42251  |
| Q9HGS2 | 4959   |
| Q9HGU3 | 40126  |
| Q9HGU4 | 5142   |
| Q9HK32 | 2303   |
| Q9HQE1 | 2242   |
| Q9HRM7 | 2242   |
| Q9HSM4 | 2242   |
| Q9HVJ7 | 287    |
| Q9K580 | 573    |
| Q9KB34 | 86665  |
| Q9LOF9 | 1902   |
| Q9RTN9 | 1299   |
| Q9S1F9 | 81861  |
| Q9TVN3 | 47911  |
| Q9TXS8 | 5833   |
| Q9URS1 | 5076   |
| Q9Y8I4 | 2277   |
| Q9Z3C4 | 287    |
| Q9ZKD8 | 85963  |
